# Supplementary material for: Identification of nonsense-mediated decay inhibitors that alter the tumor immune landscape
Source: bioRxiv preprint, doi:10.1101/2023.12.28.573594, version 2 (2024-06-10)
Supplement: supplemental table [file 573594_file04.xlsx]

## Sheet: Sheet1
Catalog Number	Product Name	M.w.	CAS Number	Target	URL	Information	Pathway	Formula	Form	Synonyms	SMILES	ALogP	HBA_Count	HBD_Count	RotatableBond
S1001	Navitoclax (ABT-263)	974.61	923564-51-6	Bcl-2	http://www.selleckchem.com/products/ABT-263.html	ABT-263 (Navitoclax) is a potent inhibitor of Bcl-xL, Bcl-2 and Bcl-w with Ki of ≤ 0.5 nM, ≤1 nM and ≤1 nM, but binds more weakly to Mcl-1 and A1. Phase 1/2.	Apoptosis	C47H55ClF3N5O6S3	Free Base	N/A	CC1(C)CCC(=C(CN2CCN(CC2)C2=CC=C(C=C2)C(=O)NS(=O)(=O)C2=CC(=C(N[C@H](CCN3CCOCC3)CSC3=CC=CC=C3)C=C2)S(=O)(=O)C(F)(F)F)C1)C1=CC=C(Cl)C=C1 |r,c:17,19,47,49,52,69,t:5,15,28,30,45,64,66|	10.495	6	2	17
S1002	ABT-737	813.43	852808-04-9	Autophagy,Bcl-2	http://www.selleckchem.com/products/ABT-737.html	ABT-737 is a BH3 mimetic inhibitor of Bcl-xL, Bcl-2 and Bcl-w with EC50 of 78.7 nM, 30.3 nM and 197.8 nM, respectively; no inhibition observed against Mcl-1, Bcl-B or Bfl-1. Phase 2.	Apoptosis	C42H45ClN6O5S2	Free Base	N/A	CN(C)CC[C@H](CSC1=CC=CC=C1)NC1=CC=C(C=C1[N+]([O-])=O)S(=O)(=O)NC(=O)C1=CC=C(C=C1)N1CCN(CC2=C(C=CC=C2)C2=CC=C(Cl)C=C2)CC1 |r,c:10,12,18,20,34,36,46,48,56,t:8,16,32,44,51,53|	8.198	3	2	16
S1003	Linifanib (ABT-869)	375.41	796967-16-3	CSF-1R,PDGFR,VEGFR	http://www.selleckchem.com/products/ABT-869.html	Linifanib (ABT-869) is a novel, potent ATP-competitive VEGFR/PDGFR inhibitor for KDR, CSF-1R, Flt-1/3 and PDGFRβ with IC50 of 4 nM, 3 nM, 3 nM/4 nM and 66 nM respectively, mostly effective in mutant kinase-dependent cancer cells (i.e. FLT3). Phase 3.	Protein Tyrosine Kinase	C21H18FN5O	Free Base	AL-39324	CC1=CC(NC(=O)NC2=CC=C(C=C2)C2=C3C(N)=NNC3=CC=C2)=C(F)C=C1 |c:10,12,15,18,22,24,29,t:1,8,26|	4.169	2	4	3
S1004	Veliparib (ABT-888)	244.29	912444-00-9	PARP	http://www.selleckchem.com/products/ABT-888.html	Veliparib (ABT-888) is a potent inhibitor of PARP1 and PARP2 with Ki of 5.2 nM and 2.9 nM, respectively. It is inactive to SIRT2. Phase 1/2.	DNA Damage	C13H16N4O	Free Base	N/A	C[C@@]1(CCCN1)C1=NC2=C(C=CC=C2N1)C(N)=O |r,c:11,13,t:7,9|	0.986	2	3	2
S1005	Axitinib	386.47	319460-85-0	c-Kit,PDGFR,VEGFR	http://www.selleckchem.com/products/Axitinib.html	Axitinib is a multi-target inhibitor of VEGFR1, VEGFR2, VEGFR3, PDGFRβ and c-Kit with IC50 of 0.1 nM, 0.2 nM, 0.1-0.3 nM, 1.6 nM and 1.7 nM, respectively.	Protein Tyrosine Kinase	C22H18N4OS	Free Base	AG 013736	CNC(=O)C1=CC=CC=C1SC1=CC2=C(C=C1)C(\C=C\C1=CC=CC=N1)=NN2 |c:6,8,14,16,24,26,28,t:4,12,22|	4.492	3	2	5
S1006	Saracatinib (AZD0530)	542.03	379231-04-6	Bcr-Abl,Src	http://www.selleckchem.com/products/AZD0530.html	Saracatinib (AZD0530) is a potent Src inhibitor with IC50 of 2.7 nM, and potent to c-Yes, Fyn, Lyn, Blk, Fgr and Lck; less active for Abl and EGFR (L858R and L861Q). Phase 1/2.	Angiogenesis	C27H32ClN5O5	Free Base	N/A	CN1CCN(CCOC2=CC(OC3CCOCC3)=C3C(NC4=C(Cl)C=CC5=C4OCO5)=NC=NC3=C2)CC1 |c:22,25,27,33,35,38,t:8,18|	3.814	7	1	8
S1007	Roxadustat (FG-4592)	352.34	808118-40-3	HIF	http://www.selleckchem.com/products/fg-4592.html	FG-4592 is an HIF α prolyl hydroxylase inhibitor, stabilizes HIF-2 and induces EPO production. Phase 2/3.	Angiogenesis	C19H16N2O5	Free Base	N/A	CC1=NC(C(=O)NCC(O)=O)=C(O)C2=C1C=C(OC1=CC=CC=C1)C=C2 |c:13,21,23,26,t:1,10,16,19|	2.306	4	2	5
S1008	Selumetinib (AZD6244)	457.68	606143-52-6	MEK	http://www.selleckchem.com/products/AZD6244.html	Selumetinib (AZD6244) is a potent, highly selective MEK1 inhibitor with IC50 of 14 nM, also inhibits ERK1/2 phosphorylation with IC50 of 10 nM, no inhibition to p38α, MKK6, EGFR, ErbB2, ERK2, B-Raf, etc. Phase 1/2.	MAPK	C17H15BrClFN4O3	Free Base	ARRY-142886	CN1C=NC2=C(F)C(NC3=CC=C(Br)C=C3Cl)=C(C=C12)C(=O)NOCCO |c:2,4,14,17,t:9,11,19|	3.234	3	3	6
S1010	Nintedanib (BIBF 1120)	539.62	656247-17-5	FGFR,PDGFR,VEGFR	http://www.selleckchem.com/products/BIBF1120.html	Nintedanib (BIBF 1120) is a potent triple angiokinase inhibitor for VEGFR1/2/3, FGFR1/2/3 and PDGFRα/β with IC50 of 34 nM/13 nM/13 nM, 69 nM/37 nM/108 nM and 59 nM/65 nM. Phase 3.	Protein Tyrosine Kinase	C31H33N5O4	Free Base	N/A	COC(=O)C1=CC=C2C(NC(=O)\C2=C(/NC2=CC=C(C=C2)N(C)C(=O)CN2CCN(C)CC2)C2=CC=CC=C2)=C1 |c:6,18,20,38,40,42,t:4,16,36|	2.965	4	2	8
S1011	Afatinib (BIBW2992)	485.94	439081-18-2	EGFR,HER2	http://www.selleckchem.com/products/BIBW2992.html	Afatinib (BIBW2992) irreversibly inhibits EGFR/HER2 including EGFR(wt), EGFR(L858R), EGFR(L858R/T790M) and HER2 with IC50 of 0.5 nM, 0.4 nM, 10 nM and 14 nM, respectively; 100-fold more active against Gefitinib-resistant L858R-T790M EGFR mutant. Phase 3.	Protein Tyrosine Kinase	C24H25ClFN5O3	Free Base	N/A	CN(C)C\C=C\C(=O)NC1=CC2=C(NC3=CC=C(F)C(Cl)=C3)N=CN=C2C=C1O[C@H]1CCOC1 |r,c:11,20,23,25,28,t:9,14,16|	3.917	5	2	8
S1012	BMS-536924	479.96	468740-43-4	IGF-1R	http://www.selleckchem.com/products/BMS-536924.html	BMS-536924 is an ATP-competitive IGF-1R/IR inhibitor with IC50 of 100 nM/73 nM, modest activity for Mek, Fak, and Lck with very little activity for Akt1, MAPK1/2.	Protein Tyrosine Kinase	C25H26ClN5O3	Free Base	N/A	CC1=C2N=C(NC2=CC(=C1)N1CCOCC1)C1=C(NC[C@@H](O)C2=CC=CC(Cl)=C2)C=CNC1=O |r,c:1,3,7,9,19,27,30,33,t:25|	2.385	3	4	6
S1014	Bosutinib (SKI-606)	530.45	380843-75-4	Src	http://www.selleckchem.com/products/Bosutinib.html	Bosutinib (SKI-606) is a novel, dual Src/Abl inhibitor with IC50 of 1.2 nM and 1 nM, respectively.	Angiogenesis	C26H29Cl2N5O3	Free Base	N/A	COC1=C(Cl)C=C(Cl)C(NC2=C(C=NC3=CC(OCCCN4CCN(C)CC4)=C(OC)C=C23)C#N)=C1 |c:2,12,37,t:5,10,14,28,32|	4.883	4	1	9
S1017	Cediranib (AZD2171)	450.51	288383-20-0	VEGFR	http://www.selleckchem.com/products/Cediranib.html	Cediranib (AZD2171) is a highly potent VEGFR(KDR) inhibitor with IC50 of <1 nM, also inhibits Flt1/4 with IC50 of 5 nM/≤3 nM, similar activity against c-Kit and PDGFRβ, 36-, 110-fold and >1000-fold selective more for VEGFR than PDGFR-α, CSF-1R and Flt3, Phase 2/3.	Protein Tyrosine Kinase	C25H27FN4O3	Free Base	Recentin	COC1=C(OCCCN2CCCC2)C=C2N=CN=C(OC3=C(F)C4=C(NC(C)=C4)C=C3)C2=C1 |c:2,16,21,28,31,35,t:14,18,24|	4.761	5	1	8
S1018	Dovitinib (TKI-258, CHIR-258)	392.43	405169-16-6	c-Kit,FGFR,FLT3,PDGFR,VEGFR	http://www.selleckchem.com/products/CHIR-258.html	Dovitinib (TKI258, CHIR258) is a multitargeted RTK inhibitor, mostly for class III (FLT3/c-Kit) with IC50 of 1 nM/2 nM, also potent to class IV (FGFR1/3) and class V (VEGFR1-4) RTKs with IC50 of 8-13 nM, less potent to InsR, EGFR, c-Met, EphA2, Tie2, IGF-1R and HER2. Phase 4.	Angiogenesis	C21H21FN6O	Citrate	CHIR-258	CN1CCN(CC1)C1=CC2=C(C=C1)N=C(N2)C1=C(N)C2=C(NC1=O)C=CC=C2F |c:10,12,15,19,22,28,30,t:8|	1.781	2	3	2
S1020	PD184352 (CI-1040)	478.67	212631-79-3	MEK	http://www.selleckchem.com/products/CI-1040-(PD184352).html	CI-1040 (PD 184352) is an ATP non-competitive MEK1/2 inhibitor with IC50 of 17 nM, 100-fold more selective for MEK1/2 than MEK5. Phase 2.	MAPK	C17H14ClF2IN2O2	Free Base	N/A	FC1=CC=C(C(=O)NOCC2CC2)C(NC2=CC=C(I)C=C2Cl)=C1F |c:21,24,t:1,3,16,18|	4.907	2	2	6
S1021	Dasatinib	488.01	302962-49-8	Bcr-Abl,c-Kit,Src	http://www.selleckchem.com/products/Dasatinib.html	Dasatinib is a novel, potent and multi-targeted inhibitor that targets Abl, Src and c-Kit, with IC50 of ＜1 nM, 0.8 nM and 79 nM, respectively.	Angiogenesis	C22H26ClN7O2S	Free Base	Sprycel	CC1=NC(NC2=NC=C(S2)C(=O)NC2=C(Cl)C=CC=C2C)=CC(=N1)N1CCN(CCO)CC1 |c:7,14,17,19,22,24,t:1,5|	3.439	4	3	7
S1022	Ridaforolimus (Deforolimus, MK-8669)	990.21	572924-54-0	mTOR	http://selleckchem.com/products/Deforolimus.html	Ridaforolimus (Deforolimus, MK-8669) is a selective mTOR inhibitor with IC50 of 0.2 nM in HT-1080 cell line; while not classified as a prodrug, mTOR inhibition and FKBP12 binding is similar to rapamycin. Phase 3.	PI3K/Akt/mTOR	C53H84NO14P	Free Base	AP23573, MK-8669	[H][C@@]12CC[C@@H](C)[C@@](O)(O1)C(=O)C(=O)N1CCCC[C@@]1([H])C(=O)O[C@@H](CC(=O)[C@H](C)\C=C(C)\[C@@H](O)[C@@H](OC)C(=O)[C@H](C)C[C@H](C)\C=C\C=C\C=C(C)\[C@H](C2)OC)[C@H](C)C[C@@H]1CC[C@@H](OP(C)(C)=O)[C@@H](C1)OC |r,c:31,50,t:46,48|	6.303	12	1	8
S1023	Erlotinib HCl (OSI-744)	429.9	183319-69-9	Autophagy,EGFR	http://www.selleckchem.com/products/Erlotinib-Hydrochloride.	Erlotinib HCl (OSI-744) is an EGFR inhibitor with IC50 of 2 nM, >1000-fold more sensitive for EGFR than human c-Src or v-Abl. Phase 3.	Protein Tyrosine Kinase	C22H24ClN3O4	Hydrochloride	(CP358774, NSC 718781) HCl	Cl.COCCOC1=C(OCCOC)C=C2C(NC3=CC=CC(=C3)C#C)=NC=NC2=C1 |c:5,18,20,24,26,29,t:12,16|	4.691	6	1	10
S1025	Gefitinib (ZD1839)	446.9	184475-35-2	EGFR	http://www.selleckchem.com/products/Gefitinib.html	Gefitinib (ZD-1839) is an EGFR inhibitor for Tyr1173, Tyr992, Tyr1173 and Tyr992 in the NR6wtEGFR and NR6W cells with IC50 of 37 nM, 37nM, 26 nM and 57 nM, respectively.	Protein Tyrosine Kinase	C22H24ClFN4O3	Free Base	ZD-1839	COC1=C(OCCCN2CCOCC2)C=C2C(NC3=CC=C(F)C(Cl)=C3)=NC=NC2=C1 |c:2,25,27,29,32,t:15,19,21|	4.203	5	1	8
S1026	Imatinib Mesylate (STI571)	589.71	220127-57-1	Bcr-Abl,c-Kit,PDGFR	http://www.selleckchem.com/products/Imatinib-Mesylate.html	Imatinib Mesylate (STI571) is an orally bioavailability mesylate salt of Imatinib, which is a multi-target inhibitor of v-Abl, c-Kit and PDGFR with IC50 of 0.6 μM, 0.1 μM and 0.1 μM, respectively.	Protein Tyrosine Kinase	C30H35N7O4S	Mesylate	Glivec, CGP-57148B, STI-571	CS(O)(=O)=O.CN1CCN(CC2=CC=C(C=C2)C(=O)NC2=CC=C(C)C(NC3=NC=CC(=N3)C3=CC=CN=C3)=C2)CC1 |c:12,14,29,31,36,38,40,t:10,20,22,27,34|	3.806	4	2	7
S1028	Lapatinib (GW-572016) Ditosylate	925.46	388082-77-7	EGFR,HER2	http://www.selleckchem.com/products/Lapatinib-Ditosylate.html	Lapatinib Ditosylate (GW572016, GW2016) is a potent EGFR and ErbB2 inhibitor with IC50 of 10.8 and 9.2 nM, respectively.	Protein Tyrosine Kinase	C43H42ClFN4O10S3	Ditosylat	GW-57201	CC1=CC=C(C=C1)S(O)(=O)=O.CC1=CC=C(C=C1)S(O)(=O)=O.CS(=O)(=O)CCNCC1=CC=C(O1)C1=CC=C2N=CN=C(NC3=CC=C(OCC4=CC=CC(F)=C4)C(Cl)=C3)C2=C1 |c:3,5,14,16,32,40,53,56,60,64,t:1,12,30,36,38,42,45,47,51|	9.339	6	2	13
S1029	Lenalidomide (CC-5013)	259.26	191732-72-6	TNF-alpha	http://www.selleckchem.com/products/Lenalidomide.html	Lenalidomide (CC-5013) is a TNF-α secretion inhibitor with IC50 of 13 nM.	Apoptosis	C13H13N3O3	Free Base	CC-5013	NC1=C2CN(C3CCC(=O)NC3=O)C(=O)C2=CC=C1 |c:1,17,19|	-0.515	3	2	1
S1030	Panobinostat (LBH589)	349.43	404950-80-7	HDAC	http://www.selleckchem.com/products/LBH-589.html	Panobinostat (LBH589) is a novel broad-spectrum HDAC inhibitor with IC50 of 5 nM. Phase 3.	Epigenetics	C21H23N3O2	Free Base	N/A	CC1=C(CCNCC2=CC=C(\C=C\C(=O)NO)C=C2)C2=C(N1)C=CC=C2 |c:1,17,20,24,26,t:7,9|	3.194	1	3	7
S1032	Motesanib Diphosphate (AMG-706)	569.44	857876-30-3	VEGFR,PDGFR,c-Kit	http://www.selleckchem.com/products/Motesanib-Diphosphate.html	Motesanib Diphosphate (AMG-706) is a potent ATP-competitive inhibitor of VEGFR1/2/3 with IC50 of 2 nM/3 nM/6 nM, respectively; similar activity against Kit, ~10-fold more selective for VEGFR than PDGFR and Ret. Phase 1/2.	Protein Tyrosine Kinase	C22H29N5O9P2	Diphosphate	AMG-706	OP(O)(O)=O.OP(O)(O)=O.CC1(C)CNC2=CC(NC(=O)C3=C(NCC4=CC=NC=C4)N=CC=C3)=CC=C12 |c:19,25,27,30,32,34,t:13,23,36|	1.783	3	3	5
S1033	Nilotinib (AMN-107)	529.52	641571-10-0	Bcr-Abl	http://www.selleckchem.com/products/Nilotinib.html	Nilotinib (AMN-107) is a Bcr-Abl inhibitor with IC50 less than 30 nM.	Angiogenesis	C28H22F3N7O	Free Base	Tasigna	CC1=CN(C=N1)C1=CC(NC(=O)C2=CC=C(C)C(NC3=NC=CC(=N3)C3=CN=CC=C3)=C2)=CC(=C1)C(F)(F)F |c:4,22,24,29,31,33,35,37,t:1,7,13,15,20,27|	5.084	5	2	7
S1034	NVP-AEW541	439.55	475489-16-8	IGF-1R	http://www.selleckchem.com/products/NVP-AEW541.html	NVP-AEW541 is a potent inhibitor of IGF-1R with IC50 of 86 nM, 27-fold greater selectivity for IGF-1R than InsR.	Protein Tyrosine Kinase	C27H29N5O	Free Base	AEW541	NC1=NC=NC2=C1C(=CN2[C@@H]1C[C@H](CN2CCC2)C1)C1=CC(OCC2=CC=CC=C2)=CC=C1 |r,c:3,5,8,30,32,34,36,t:1,23,28|	4.226	3	1	7
S1035	Pazopanib HCl (GW786034 HCl)	473.98	635702-64-6	c-Kit,PDGFR,VEGFR	http://www.selleckchem.com/products/Pazopanib-Hydrochloride.html	Pazopanib (GW786034) is a novel multi-target inhibitor of VEGFR1, VEGFR2, VEGFR3, PDGFR, FGFR, c-Kit and c-Fms with IC50 of 10 nM, 30 nM, 47 nM, 84 nM, 74 nM, 140 nM and 146 nM, respectively.	Protein Tyrosine Kinase	C21H24ClN7O2S	Hydrochloride	GW786034	Cl.CN(C1=CC2=NN(C)C(C)=C2C=C1)C1=NC(NC2=CC=C(C)C(=C2)S(N)(=O)=O)=NC=C1 |c:9,12,24,30,32,t:2,4,15,19,21|	4.123	5	2	5
S1036	PD0325901	482.19	391210-10-9	MEK	http://www.selleckchem.com/products/PD-0325901.html	PD0325901 (PD325901) is selective and non ATP-competitive MEK inhibitor with IC50 of 0.33 nM, roughly 500-fold more potent than CI-1040 on phosphorylation of ERK1 and ERK2. Phase 1/2.	DNA Damage	C16H14F3IN2O4	Free Base	N/A	OC[C@@H](O)CONC(=O)C1=C(NC2=CC=C(I)C=C2F)C(F)=C(F)C=C1 |r,c:9,17,25,t:12,14,22|	2.578	2	4	7
S1038	PI-103	348.36	371935-74-9	Autophagy,DNA-PK,mTOR,PI3K	http://www.selleckchem.com/products/PI-103.html	PI-103 is a multi-targeted PI3K inhibitor for p110α/β/δ/γ with IC50 of 2 nM/3 nM/3 nM/15 nM, less potent to mTOR/DNA-PK with IC50 of 30 nM/23 nM.	Neuronal Signaling	C19H16N4O3	Free Base	N/A	OC1=CC(=CC=C1)C1=NC2=C(OC3=C2C=CC=N3)C(=N1)N1CCOCC1 |c:3,5,13,16,18,21,t:1,8,10|	2.798	5	1	2
S1039	Rapamycin (Sirolimus)	914.18	53123-88-9	Autophagy,mTOR	http://www.selleckchem.com/products/Rapamycin.html	Rapamycin (Sirolimus, AY-22989, WY-090217) is a specific mTOR inhibitor with IC50 of ~0.1 nM.	DNA Damage	C51H79NO13	Free Base	N/A	CO[C@@H]1C[C@H](C[C@@H](C)[C@@H]2CC(=O)[C@H](C)\C=C(C)\[C@@H](O)[C@@H](OC)C(=O)[C@H](C)C[C@H](C)\C=C\C=C\C=C(C)\[C@H](C[C@@H]3CC[C@@H](C)[C@@](O)(O3)C(=O)C(=O)N3CCCC[C@H]3C(=O)O2)OC)CC[C@H]1O |r,c:14,33,t:29,31|	6.295	10	2	6
S1040	Sorafenib Tosylate	637.03	475207-59-1	PDGFR,Raf,VEGFR	http://www.selleckchem.com/products/Sorafenib-Tosylate.html	Sorafenib Tosylate (Bay 43-9006) is a multikinase inhibitor of Raf-1, B-Raf and VEGFR-2 with IC50 of 6 nM, 22 nM and 90 nM, respectively.	Neuronal Signaling	C28H24ClF3N4O6S	Tosylate	Bay 43-9006	CC1=CC=C(C=C1)S(O)(=O)=O.CNC(=O)C1=CC(OC2=CC=C(NC(=O)NC3=CC=C(Cl)C(=C3)C(F)(F)F)C=C2)=CC=N1 |c:3,5,32,39,41,43,t:1,15,19,21,27,29|	5.824	4	3	7
S1041	STF-62247	267.35	315702-99-9	Others	http://selleckchem.com/products/STF-62247.html	STF-62247 shows selective toxicity and growth inhibition of renal cells lacking VHL; 25-fold greater sensitivity observed for cells with VHL deficiency compared to wild-type (VHL+).	Others	C15H13N3S	Free Base	N/A	CC1=CC(NC2=NC(=CS2)C2=CC=NC=C2)=CC=C1 |c:7,13,15,17,19,t:1,5,11|	3.659	2	1	3
S1042	Sunitinib Malate	532.56	341031-54-7	c-Kit,PDGFR,VEGFR	http://www.selleckchem.com/products/Sunitinib-Malate-(Sutent).html	Sunitinib Malate is a multi-targeted RTK inhibitor targeting VEGFR2 (Flk-1) and PDGFRβ with IC50 of 80 nM and 2 nM, and also inhibits c-Kit.	Microbiology	C26H33FN4O7	Malate	SU-11248	O[C@@H](CC(O)=O)C(O)=O.CCN(CC)CCNC(=O)C1=C(C)NC(\C=C2/C(=O)NC3=CC=C(F)C=C23)=C1C |r,c:18,36,t:28,30,33|	-1.049	4	4	10
S1044	Temsirolimus (CCI-779, NSC 683864)	1030.29	162635-04-3	mTOR	http://www.selleckchem.com/products/Temsirolimus.html	Temsirolimus (CCI-779) is a specific mTOR inhibitor with IC50 of 1.76 μM.	Neuronal Signaling	C56H87NO16	Free Base	N/A	CO[C@@H]1C[C@H](C[C@@H](C)[C@@H]2CC(=O)[C@H](C)\C=C(C)\[C@@H](O)[C@@H](OC)C(=O)[C@H](C)C[C@H](C)\C=C\C=C\C=C(C)\[C@H](C[C@@H]3CC[C@@H](C)[C@@](O)(O3)C(=O)C(=O)N3CCCC[C@H]3C(=O)O2)OC)CC[C@H]1OC(=O)C(C)(CO)CO |r,c:14,33,t:29,31|	6.039	12	3	11
S1045	Trichostatin A (TSA)	302.4	58880-19-6	HDAC	http://www.selleckchem.com/products/Trichostatin-A.html	Trichostatin A (TSA) is an HDAC inhibitor with IC50 of ~1.8 nM – HDAC8 is the only known member of the HDAC-family that is not affected by TSA. Phase 3.	Others	C17H22N2O3	Free Base	TSA	C[C@H](\C=C(C)\C=C\C(=O)NO)C(=O)C1=CC=C(C=C1)N(C)C |r,c:15,17,t:13|	2.772	2	1	6
S1046	Vandetanib (ZD6474)	475.35	443913-73-3	VEGFR	http://www.selleckchem.com/products/Vandetanib.html	Vandetanib (ZD6474) is a potent inhibitor of VEGFR2 with IC50 of 40 nM.	Endocrinology & Hormones	C22H24BrFN4O2	Free Base	ZD6474	COC1=CC2=C(C=C1OCC1CCN(C)CC1)N=CN=C2NC1=C(F)C=C(Br)C=C1 |c:4,6,19,21,25,31,t:2,28|	5.087	4	1	6
S1047	Vorinostat (SAHA, MK0683)	264.3	149647-78-9	Autophagy,HDAC	http://www.selleckchem.com/products/Vorinostat-(SAHA).html	Vorinostat (suberoylanilide hydroxamic acid, SAHA) is an HDAC inhibitor with IC50 of ~10 nM.	Endocrinology & Hormones	C14H20N2O3	Free Base	Zolinza, MK-0683	ONC(=O)CCCCCCC(=O)NC1=CC=CC=C1 |c:15,17,t:13|	2.005	2	2	8
S1048	Tozasertib (VX-680, MK-0457)	464.59	639089-54-6	Aurora Kinase	http://www.selleckchem.com/products/VX-680(MK-0457).html	VX-680 (Tozasertib, MK-0457) is a pan-Aurora inhibitor, mostly against Aurora A with Kiapp of 0.6 nM, less potent towards Aurora B/Aurora C and 100-fold more selective for Aurora A than 55 other kinases. Phase 2.	Endocrinology & Hormones	C23H28N8OS	Free Base	N/A	CN1CCN(CC1)C1=NC(SC2=CC=C(NC(=O)C3CC3)C=C2)=NC(NC2=NNC(C)=C2)=C1 |c:23,25,33,35,t:8,12,14,29|	4.445	4	3	7
S1049	Y-27632 2HCl	320.26	129830-38-2	Autophagy,ROCK	http://www.selleckchem.com/products/Y-27632.html	Y-27632 2HCl is a selective ROCK1 (p160ROCK) inhibitor with Ki of 140 nM, exhibits >200-fold selectivity over other kinases, including PKC, cAMP-dependent protein kinase, MLCK and PAK.	Others	C14H23Cl2N3O	Dihydrochloride	N/A	Cl.Cl.C[C@@H](N)[C@H]1CC[C@@H](CC1)C(=O)NC1=CC=NC=C1 |r,c:15,17,t:13|	1.871	2	2	3
S1052	Elesclomol (STA-4783)	400.5	488832-69-5	HSP (e.g. HSP90)	http://www.selleckchem.com/products/Elesclomol.html	Elesclomol (STA-4783) is a novel potent oxidative stress inducer that elicits pro-apoptosis events among tumor cells.	Angiogenesis	C19H20N4O2S2	Free Base	STA-4783	CN(NC(=O)CC(=O)NN(C)C(=S)C1=CC=CC=C1)C(=S)C1=CC=CC=C1 |c:15,17,24,26,t:13,22|	2.885	2	2	8
S1053	Entinostat (MS-275)	376.41	209783-80-2	HDAC	http://www.selleckchem.com/products/MS-275.html	Entinostat (MS-275) strongly inhibits HDAC1 and HDAC3 with IC50 of 0.51 μM and 1.7 μM, compared with HDACs 4, 6, 8, and 10. Phase 1/2.	Transmembrane Transporters	C21H20N4O3	Free Base	SNDX-275	NC1=CC=CC=C1NC(=O)C1=CC=C(CNC(=O)OCC2=CN=CC=C2)C=C1 |c:3,5,23,25,28,t:1,11,13,21|	2.071	4	3	7
S1055	Enzastaurin (LY317615)	515.61	170364-57-5	PKC	http://www.selleckchem.com/products/Enzastaurin.html	Enzastaurin (LY317615) is a potent PKCβ selective inhibitor with IC50 of 6 nM, 6- to 20-fold selectivity against PKCα, PKCγ and PKCε. Phase 3.	Neuronal Signaling	C32H29N5O2	Free Base	N/A	CN1C=C(C2=CC=CC=C12)C1=C(C(=O)NC1=O)C1=CN(C2CCN(CC3=NC=CC=C3)CC2)C2=CC=CC=C12 |c:2,6,30,32,40,t:4,8,12,20,28,38,42|	4.32	3	1	5
S1056	AC480 (BMS-599626)	567.01	714971-09-2	EGFR,HER2	http://www.selleckchem.com/products/BMS-599626.html	AC480 (BMS-599626) is a selective and efficacious inhibitor of HER1 and HER2 with IC50 of 20 nM and 30 nM, ~8-fold less potent to HER4, >100-fold to VEGFR2, c-Kit, Lck, MET etc. Phase 1.	Neuronal Signaling	C27H27FN8O3	Free Base	N/A	CC1=C2N(C=C1NC(=O)OC[C@@H]1COCCN1)N=CN=C2NC1=CC2=C(C=C1)N(CC1=CC=CC(F)=C1)N=C2 |r,c:4,19,21,27,29,36,39,42,t:1,25,34|	3.726	6	3	8
S1057	Obatoclax Mesylate (GX15-070)	413.49	803712-79-0	Autophagy,Bcl-2	http://www.selleckchem.com/products/Obatoclax-Mesylate.html	Obatoclax (GX15-070) is an antagonist of Bcl-2 with Ki of 0.22 μM, can assist in overcoming MCL-1 mediated resistance to apoptosis. Phase 1/2.	Neuronal Signaling	C21H23N3O4S	Mesylate	N/A	CS(O)(=O)=O.COC1=CC(=N\C\1=C/C1=C(C)C=C(C)N1)C1=CC2=CC=CC=C2N1 |c:8,13,25,27,t:6,16,21,23|	3.757	2	2	3
S1060	Olaparib (AZD2281, Ku-0059436)	434.46	763113-22-0	PARP	http://www.selleckchem.com/products/AZD2281(Olaparib).html	Olaparib (AZD2281, KU0059436) is a selective inhibitor of PARP1/2 with IC50 of 5 nM/1 nM, 300-times less effective against tankyrase-1. Phase 1/2.	Protein Tyrosine Kinase	C24H23FN4O3	Free Base	KU-0059436	FC1=C(C=C(CC2=NNC(=O)C3=C2C=CC=C3)C=C1)C(=O)N1CCN(CC1)C(=O)C1CC1 |c:11,14,16,19,t:1,3,6|	2.127	4	1	4
S1061	Nutlin-3	581.5	548472-68-0	E3 Ligase ,Mdm2	http://www.selleckchem.com/products/Nutlin-3.html	Nutlin-3 is a potent and selective Mdm2 (RING finger-dependent ubiquitin protein ligase for itself and p53) antagonist with IC50 of 90 nM; stabilizes p73 in p53-deficient cells.	Neuronal Signaling	C30H30Cl2N4O4	Free Base	N/A	COC1=CC(OC(C)C)=C(C=C1)C1=NC(C(N1C(=O)N1CCNC(=O)C1)C1=CC=C(Cl)C=C1)C1=CC=C(Cl)C=C1 |c:8,10,34,42,t:2,13,29,31,37,39|	5.434	5	1	6
S1064	Masitinib (AB1010)	498.64	790299-79-5	c-Kit,PDGFR	http://www.selleckchem.com/products/Masitinib-(AB1010).html	Masitinib is a novel inhibitor for Kit and PDGFRα/β with IC50 of 200 nM and 540 nM/800 nM, weak inhibition to ABL and c-Fms. Phase 2/3.	Others	C28H30N6OS	Free Base	N/A	CN1CCN(CC2=CC=C(C=C2)C(=O)NC2=CC(NC3=NC(=CS3)C3=CC=CN=C3)=C(C)C=C2)CC1 |c:8,10,22,28,30,35,t:6,16,20,26,32|	4.475	3	2	7
S1065	Pictilisib (GDC-0941)	513.64	957054-30-7	PI3K	http://www.selleckchem.com/products/GDC-0941.html	GDC-0941 is a potent inhibitor of PI3Kα/δ with IC50 of 3 nM, with modest selectivity against p110β (11-fold) and p110γ (25-fold).	Metabolism	C23H27N7O3S2	Free Base	N/A	CS(=O)(=O)N1CCN(CC2=CC3=NC(=NC(N4CCOCC4)=C3S2)C2=CC=CC3=C2C=NN3)CC1 |c:13,22,29,31,34,t:9,11,27|	2.153	6	1	5
S1066	SL-327	335.35	305350-87-2	MEK	http://www.selleckchem.com/products/SL327.html	SL327 is a selective inhibitor for MEK1/2 with IC50 of 0.18 μM/ 0.22 μM, no activity towards Erk1, MKK3, MKK4, c-JUN, PKC, PKA, or CamKII;capable of transport through the blood-brain barrier.	Others	C16H12F3N3S	Free Base	N/A	N\C(SC1=CC=C(N)C=C1)=C(\C#N)C1=C(C=CC=C1)C(F)(F)F |c:8,16,18,t:3,5,14|	3.705	0	2	4
S1067	SB431542	384.39	301836-41-9	TGF-beta/Smad	http://www.selleckchem.com/products/SB-431542.html	SB431542 is a potent and selective inhibitor of ALK5 with IC50 of 94 nM, 100-fold more selective for ALK5 than p38 MAPK and other kinases.	Others	C22H16N4O3	Free Base	N/A	NC(=O)C1=CC=C(C=C1)C1=NC(=C(N1)C1=NC=CC=C1)C1=CC2=C(OCO2)C=C1 |c:5,7,12,18,20,31,t:3,10,16,23,25|	3.447	5	2	4
S1068	Crizotinib (PF-02341066)	450.34	877399-52-5, 877399-53-6 (acetate)	ALK,c-Met	http://www.selleckchem.com/products/PF-2341066.html	PF-2341066 (Crizotinib) is a potent inhibitor of c-Met and ALK with IC50 of 11 nM and 24 nM, respectivley.	Others	C21H22Cl2FN5O	Free Base	N/A	C[C@@H](OC1=C(N)N=CC(=C1)C1=CN(N=C1)C1CCNCC1)C1=C(Cl)C=CC(F)=C1Cl |r,c:3,6,8,14,24,27,30,t:11|	3.693	3	2	5
S1069	Luminespib (AUY-922, NVP-AUY922)	465.54	747412-49-3	HSP (e.g. HSP90)	http://www.selleckchem.com/products/NVP-AUY922.html	AUY922 (NVP-AUY922) is a highly potent HSP90 inhibitor for HSP90α/β with IC50 of 13 nM /21 nM, weaker potency against the HSP90 family members GRP94 and TRAP-1, exhibits the tightest binding of any small-molecule HSP90 ligand. Phase 1/2.	Others	C26H31N3O5	Free Base	N/A	CCNC(=O)C1=NOC(=C1C1=CC=C(CN2CCOCC2)C=C1)C1=CC(C(C)C)=C(O)C=C1O |c:8,23,34,t:5,11,13,26,31|	4.069	4	3	7
S1070	PHA-665752	641.61	477575-56-7	c-Met	http://www.selleckchem.com/products/PHA-665752.html	PHA-665752 is a potent, selective and ATP-competitive c-Met inhibitor with IC50 of 9 nM, >50-fold selectivity for c-Met than RTKs or STKs.	Others	C32H34Cl2N4O4S	Free Base	N/A	CC1=C(C(=O)N2CCC[C@@H]2CN2CCCC2)C(C)=C(N1)\C=C1/C(=O)NC2=C1C=C(C=C2)S(=O)(=O)CC1=C(Cl)C=CC=C1Cl |r,c:1,19,28,31,33,40,43,45|	5.689	4	2	7
S1071	HA14-1	409.23	65673-63-4	Bcl-2	http://www.selleckchem.com/products/HA14-1.html	HA14-1 is a non-peptidic ligand of a Bcl-2 surface pocket with IC50 of ~9 μM.	Neuronal Signaling	C17H17BrN2O5	Free Base	HA141	[H][C@@]1([C@H](C#N)C(=O)OCC)C2=CC(Br)=CC=C2OC(N)=C1C(=O)OCC |r,c:13,15,20,t:10|	2.511	5	1	7
S1072	ZSTK474	417.41	475110-96-4	PI3K	http://www.selleckchem.com/products/ZSTK474.html	ZSTK474 inhibits class I PI3Kisoforms with IC50 of 37 nM, mostly PI3Kδ.	Neuronal Signaling	C19H21F2N7O2	Free Base	N/A	FC(F)C1=NC2=C(C=CC=C2)N1C1=NC(=NC(=N1)N1CCOCC1)N1CCOCC1 |c:7,9,16,18,t:3,5,14|	3.366	6	0	4
S1075	SB216763	371.22	280744-09-4	GSK-3	http://www.selleckchem.com/products/SB-216763.html	SB216763 is a potent and selective GSK-3 inhibitor with IC50 of 34.3 nM for GSK-3α and equally effective at inhibiting human GSK-3β.	Others	C19H12Cl2N2O2	Free Base	N/A	CN1C=C(C2=C1C=CC=C2)C1=C(C(=O)NC1=O)C1=CC=C(Cl)C=C1Cl |c:2,4,7,9,25,t:12,20,22|	4.391	2	1	2
S1076	SB203580	377.43	152121-47-6	p38 MAPK	http://www.selleckchem.com/products/SB-203580.html	SB203580 is a p38 MAPK inhibitor with IC50 of 0.3-0.5 μM, 10-fold less sensitive to SAPK3(106T) and SAPK4(106T) and blocks PKB phosphorylation with IC50 of 3-5 μM.	Transmembrane Transporters	C21H16FN3OS	Free Base	N/A	CS(=O)C1=CC=C(C=C1)C1=NC(=C(N1)C1=CC=NC=C1)C1=CC=C(F)C=C1 |c:5,7,12,18,20,28,t:3,10,16,23,25|	3.883	3	1	4
S1077	SB202190 (FHPI)	331.34	152121-30-7	p38 MAPK	http://www.selleckchem.com/products/SB-202190.html	SB202190 (FHPI) is a potent p38 MAPK inhibitor targeting p38α/β with IC50 of 50 nM/100 nM, sometimes used instead of SB 203580 to investigate potential roles for SAPK2a/p38 in vivo.	PI3K/Akt/mTOR	C20H14FN3O	Free Base	N/A	OC1=CC=C(C=C1)C1=NC(=C(N1)C1=CC=NC=C1)C1=CC=C(F)C=C1 |c:3,5,10,16,18,26,t:1,8,14,21,23|	4.211	2	2	3
S1078	MK-2206 2HCl	480.39	1032350-13-2	Akt	http://www.selleckchem.com/products/MK-2206.html	MK-2206 2HCl is a highly selective inhibitor of Akt1/2/3 with IC50 of 8 nM/12 nM/65 nM, respectively; no inhibitory activities against 250 other protein kinases observed. Phase 2.	Others	C25H23Cl2N5O	Dihydrochloride	N/A	Cl.Cl.NC1(CCC1)C1=CC=C(C=C1)C1=C(C=C2C3=NNC(=O)N3C=CC2=N1)C1=CC=CC=C1 |c:8,10,24,27,32,34,t:6,13,15,17,30|	4.183	3	2	3
S1080	SU11274	568.09	658084-23-2	c-Met	http://www.selleckchem.com/products/SU11274.html	SU11274 is a selective Met inhibitor with IC50 of 10 nM, no effects on PGDFRβ, EGFR or Tie2.	Neuronal Signaling	C28H30ClN5O4S	Free Base	PKI-SU11274	CN(C1=CC(Cl)=CC=C1)S(=O)(=O)C1=CC2=C(NC(=O)\C2=C/C2=C(C)C(C(=O)N3CCN(C)CC3)=C(C)N2)C=C1 |c:5,7,23,41,t:2,13,15,36|	3.477	4	2	5
S1082	Vismodegib (GDC-0449)	421.3	879085-55-9	Hedgehog/Smoothened	http://www.selleckchem.com/products/GDC-0449.html	Vismodegib (GDC-0449) is a potent, novel and specific hedgehog inhibitor with IC50 of 3 nM and also inhibits P-gp with IC50 of 3.0 μM.	Neuronal Signaling	C19H14Cl2N2O3S	Free Base	N/A	CS(=O)(=O)C1=CC=C(C(=O)NC2=CC(=C(Cl)C=C2)C2=NC=CC=C2)C(Cl)=C1 |c:16,21,23,27,t:4,6,11,13,19|	4.265	4	1	4
S1084	Brivanib (BMS-540215)	370.38	649735-46-6	FGFR,VEGFR	http://www.selleckchem.com/products/Brivanib.html	Brivanib is an ATP-competitive inhibitor against VEGFR2 with IC50 of 25 nM, moderate potency against VEGFR-1 and FGFR-1, but >240-fold against PDGFR-β. Phase 3.	GPCR & G Protein	C19H19FN4O3	Free Base	N/A	C[C@@H](O)COC1=CN2N=CN=C(OC3=C(F)C4=C(NC(C)=C4)C=C3)C2=C1C |r,c:8,13,20,23,27,t:5,10,16|	3.481	4	2	5
S1085	Belinostat (PXD101)	318.35	414864-00-9	HDAC	http://www.selleckchem.com/products/Belinostat.html	Belinostat (PXD101) is a novel HDAC inhibitor with IC50 of 27 nM, with activity demonstrated in cisplatin-resistant tumors. Phase 1/2.	Others	C15H14N2O4S	Free Base	N/A	ONC(=O)\C=C\C1=CC(=CC=C1)S(=O)(=O)NC1=CC=CC=C1 |c:8,10,19,21,t:6,17|	1.8	3	2	5
S1087	Iniparib (BSI-201)	292.03	160003-66-7	PARP	http://www.selleckchem.com/products/BSI-201.html	BSI-201 (Iniparib, SAR240550) is a PARP1 inhibitor with demonstrated effectiveness in triple-negative breast cancer (TNBC). Phase 3.	Others	C7H5IN2O3	Free Base	SAR240550	NC(=O)C1=CC(=C(I)C=C1)[N+]([O-])=O |c:8,t:3,5|	1.304	1	1	2
S1089	Refametinib (RDEA119, Bay 86-9766)	572.34	923032-37-5	MEK	http://www.selleckchem.com/products/refametinib-rdea119-bay86-9766.html	Refametinib (RDEA119, Bay 86-9766) is a potent, ATP non-competitive and highly selective inhibitor of MEK1 and MEK2 with IC50 of 19 nM and 47 nM, respectively.	Others	C19H20F3IN2O5S	Free Base	BAY 869766	COC1=C(NS(=O)(=O)C2(C[C@H](O)CO)CC2)C(NC2=CC=C(I)C=C2F)=C(F)C(F)=C1 |r,c:2,24,31,t:19,21,27|	2.827	3	4	9
S1090	Abexinostat (PCI-24781)	397.42	783355-60-2	HDAC	http://www.selleckchem.com/products/PCI-24781.html	PCI-24781 is a novel pan-HDAC inhibitor mostly targeting HDAC1 with Ki of 7 nM, modest potent to HDACs 2, 3, 6, and 10 and greater than 40-fold selectivity against HDAC8. Phase 1/2.	Others	C21H23N3O5	Free Base	CRA-02478	CN(C)CC1=C(OC2=CC=CC=C12)C(=O)NCCOC1=CC=C(C=C1)C(=O)NO |c:9,23,25,t:4,7,11,21|	2.353	4	2	8
S1091	Linsitinib (OSI-906)	421.49	867160-71-2	IGF-1R	http://www.selleckchem.com/products/OSI-906.html	OSI-906 (Linsitinib) is a selective inhibitor of IGF-1R with IC50 of 35 nM; modestly potent to InsR with IC50 of 75 nM, and no activity towards Abl, ALK, BTK, EGFR, FGFR1/2, PKA etc. Phase 3.	Others	C26H23N5O	Free Base	N/A	C[C@@]1(O)C[C@@H](C1)C1=NC(=C2N1C=CN=C2N)C1=CC=C2C=CC(=NC2=C1)C1=CC=CC=C1 |r,c:9,13,15,23,25,28,33,35,t:7,19,21,31|	3.757	3	1	3
S1092	KU-55933 (ATM Kinase Inhibitor)	395.49	587871-26-9	ATM/ATR	http://www.selleckchem.com/products/KU-55933.html	KU-55933 is a potent and specific ATM inhibitor with IC50/Ki of 12.9 nM/2.2 nM, and is highly selective for ATM as compared to DNA-PK, PI3K/PI4K, ATR and mTOR.	Others	C21H17NO3S2	Free Base	N/A	O=C1C=C(OC(=C1)C1=CC=CC2=C1SC1=CC=CC=C1S2)N1CCOCC1 |c:2,5,10,12,18,20,t:8,16|	4.393	3	0	2
S1093	GSK1904529A	851.96	1089283-49-7	IGF-1R	http://www.selleckchem.com/products/GSK1904529A.html	GSK1904529A is a selective inhibitor of IGF-1R and IR with IC50 of 27 nM and 25 nM, >100-fold more selective for IGF-1R/InsR than Akt1/2, Aurora A/B,B-Raf, CDK2, EGFR etc.	Others	C44H47F2N9O5S	Free Base	N/A	CCC1=CC(NC2=NC(=CC=N2)C2=C(N=C3C=CC=CN23)C2=CC(C(=O)NC3=C(F)C=CC=C3F)=C(OC)C=C2)=C(OC)C=C1N1CCC(CC1)N1CCN(CC1)S(C)(=O)=O |c:8,10,17,19,30,33,35,42,48,t:2,6,13,15,24,38,44|	6.571	8	2	12
S1094	PF-04217903	372.38	956905-27-4	c-Met	http://www.selleckchem.com/products/PF-04217903.html	PF-04217903 is a selective ATP-competitive c-Met inhibitor with IC50 of 4.8 nM, susceptible to oncogenic mutations (no activity to Y1230C mutant). Phase 1.	Others	C19H16N8O	Free Base	N/A	OCCN1C=C(C=N1)C1=NC2=C(N=NN2CC2=CC3=CC=CN=C3C=C2)N=C1 |c:4,6,13,22,24,27,30,t:9,11,18,20|	1.561	6	1	5
S1095	Dacinostat (LAQ824)	379.459	404951-53-7	HDAC	http://www.selleckchem.com/products/LAQ824(NVP-LAQ824).html	LAQ824 (Dacinostat) is a novel HDAC inhibitor with IC50 of 32 nM and is known to activate the p21 promoter.	Others	C22H25N3O3	Free Base	N/A	OCCN(CCC1=CNC2=C1C=CC=C2)CC1=CC=C(\C=C\C(=O)NO)C=C1 |c:9,12,14,28,t:6,18,20|	3.045	1	3	9
S1096	Quisinostat (JNJ-26481585) 2HCl	394.476	875320-31-3	HDAC	http://www.selleckchem.com/products/JNJ-26481585.html	JNJ-26481585 is a novel second-generation HDAC inhibitor with highest potency for HDAC1 with IC50 of 0.11 nM, modest potent to HDACs 2, 4, 10, and 11; greater than 30-fold selectivity against HDACs 3, 5, 8, and 9 and lowest potency to HDACs 6 and 7. Phase 2.	Others	C21H28Cl2N6O2	Dihydrochloride	N/A	Cl.Cl.CN1C=C(CNCC2CCN(CC2)C2=NC=C(C=N2)C(=O)NO)C2=CC=CC=C12 |c:16,18,27,t:2,14,25,29|	2.749	3	2	6
S1097	BTZ043 Racemate	431.39	957217-65-1	Others	http://www.selleckchem.com/products/BTZ043.html	BTZ043 racemate is a decaprenylphosphoryl-β-D-ribose 2'-epimerase (DprE1) inhibitor acting as a new antimycobacterial agent that kill Mycobacterium tuberculosis.	Others	C17H16F3N3O5S	Free Base	BTZ038, BTZ044	CC1COC2(CCN(CC2)C2=NC(=O)C3=CC(=CC([N+]([O-])=O)=C3S2)C(F)(F)F)O1 |c:17,22,t:11,15|	3.515	4	0	3
S1098	Rucaparib (AG-014699,PF-01367338) phosphate	421.36	459868-92-9	PARP	http://www.selleckchem.com/products/AG-014699.html	Rucaparib (AG-014699, PF-01367338) is an inhibitor of PARP with Ki of 1.4 nM for PARP1, also showing binding affinity to eight other PARP domains. Phase 1/2.	Others	C19H21FN3O5P	Phosphate	AG-014447	OP(O)(O)=O.CNCC1=CC=C(C=C1)C1=C2CCNC(=O)C3=CC(F)=CC(N1)=C23 |c:9,11,14,24,t:7,21,28|	2.49	1	3	3
S1100	MLN8054	476.86	869363-13-3	Aurora Kinase	http://www.selleckchem.com/products/MLN8054.html	MLN8054 is a potent and selective inhibitor of Aurora A with IC50 of 4 nM. It is more than 40-fold selective for Aurora A than Aurora B. Phase 1.	Others	C25H15ClF2N4O2	Free Base	N/A	OC(=O)C1=CC=C(NC2=NC3=C(CN=C(C4=CC(Cl)=CC=C34)C3=C(F)C=CC=C3F)C=N2)C=C1 |c:13,18,24,27,29,33,36,t:3,5,8,10,15,20|	6.192	4	1	4
S1101	Vatalanib (PTK787) 2HCl	419.73	212141-51-0	c-Kit,VEGFR	http://www.selleckchem.com/products/Vatalanib,Dihydrochloride-Salt.html	Vatalanib (PTK787) is an inhibitor of VEGFR2/KDR with IC50 of 37 nM, less potent against VEGFR1/Flt-1, 18-fold against VEGFR3/Flt-4. Phase 1/2.	Others	C20H17Cl3N4	Dihydrochloride	ZK222584	Cl.Cl.ClC1=CC=C(NC2=NN=C(CC3=CC=NC=C3)C3=CC=CC=C23)C=C1 |c:13,15,20,26,t:1,3,6,8,11,18,22|	5.469	3	1	4
S1102	U0126-EtOH	426.56	1173097-76-1	MEK	http://www.selleckchem.com/products/U0126.html	U0126-EtOH is a highly selective inhibitor of MEK1/2 with IC50 of 0.07 μM/0.06 μM, 100-fold higher affinity for ΔN3-S218E/S222D MEK than PD098059.	Others	C20H22N6OS2	Ethanolate	N/A	CCO.N\C(SC1=CC=CC=C1N)=C(C#N)\C(C#N)=C(\N)SC1=CC=CC=C1N |c:7,9,24,26,t:5,22|	2.169	0	5	5
S1103	ZM 447439	513.59	331771-20-1	Aurora Kinase	http://www.selleckchem.com/products/ZM-447439.html	ZM 447439 is a selective and ATP-competitive inhibitor for Aurora A and Aurora B with IC50 of 110 nM and 130 nM, respectively. It is more than 8-fold selective for Aurora A/B than MEK1, Src, Lck and has little effect againstCDK1/2/4, Plk1, Chk1, etc.	Others	C29H31N5O4	Free Base	N/A	COC1=C(OCCCN2CCOCC2)C=C2N=CN=C(NC3=CC=C(NC(=O)C4=CC=CC=C4)C=C3)C2=C1 |c:2,17,31,33,36,40,t:15,19,22,24,29|	4.118	6	2	10
S1104	GDC-0879	334.37	905281-76-7	Raf	http://www.selleckchem.com/products/GDC-0879.html	GDC-0879 is a novel, potent, and selective B-Raf inhibitor with IC50 of 0.13 nM with activity against c-Raf as well; no inhibition known to other protein kinases.	Others	C19H18N4O2	Free Base	N/A	OCCN1C=C(C(=N1)C1=CC=NC=C1)C1=CC=C2C(CC\C2=N/O)=C1 |c:4,6,11,13,18,26,t:9,16|	2.387	3	1	4
S1105	LY294002	307.34	154447-36-6	Autophagy,PI3K	http://www.selleckchem.com/products/LY294002.html	LY294002 is the first synthetic molecule known to inhibit PI3Kα/δ/β with IC50 of 0.5 μM/0.57 μM/0.97 μM, respectively; more stable in solution than Wortmannin, and also blocks autophagosome formation.	Others	C19H17NO3	Free Base	N/A	O=C1C=C(OC2=C(C=CC=C12)C1=CC=CC=C1)N1CCOCC1 |c:2,7,15,17,t:5,9,13|	3.342	3	0	2
S1106	OSU-03012 (AR-12)	460.45	742112-33-0	PDK	http://www.selleckchem.com/products/OSU-03012.html	OSU-03012 is a potent inhibitor of recombinant PDK-1 with IC50 of 5 μM and 2-fold increase in potency over OSU-02067.	Others	C26H19F3N4O	Free Base	AR-12	NCC(=O)NC1=CC=C(C=C1)N1N=C(C=C1C1=CC2=C(C=C1)C1=C(C=CC=C1)C=C2)C(F)(F)F |c:7,9,13,15,20,22,27,29,32,t:5,18,25|	5.212	2	2	5
S1107	Danusertib (PHA-739358)	474.55	827318-97-8	Aurora Kinase,Bcr-Abl,c-RET,FGFR	http://www.selleckchem.com/products/PHA-739358(Danusertib).html	Danusertib (PHA-739358) is an Aurora kinase inhibitor for Aurora A/B/C with IC50 of 13 nM/79 nM/61 nM, modestly potent to Abl, TrkA, c-RET and FGFR1, and less potent to Lck, VEGFR2/3, c-Kit, CDK2, etc. Phase 2.	Others	C26H30N6O3	Free Base	N/A	CO[C@@H](C(=O)N1CC2=C(C1)C(NC(=O)C1=CC=C(C=C1)N1CCN(C)CC1)=NN2)C1=CC=CC=C1 |r,c:7,17,19,29,35,37,t:15,33|	2.337	4	2	6
S1109	BI 2536	521.66	755038-02-9	PLK	http://www.selleckchem.com/products/BI-2536.html	BI2536 is a potent Plk1 inhibitor with IC50 of 0.83 nM. It shows 4- and 11-fold greater selectivity against Plk2 and Plk3. Phase 2.	Others	C28H39N7O3	Free Base	N/A	CC[C@H]1N(C2CCCC2)C2=NC(NC3=CC=C(C=C3OC)C(=O)NC3CCN(C)CC3)=NC=C2N(C)C1=O |r,c:16,18,33,35,t:10,14|	3.548	5	2	7
S1110	Varespladib (LY315920)	380.39	172732-68-2	Phospholipase (e.g. PLA)	http://www.selleckchem.com/products/LY315920(Varespladib).html	LY315920 (Varespladib) is a potent and selective human non-pancreatic secretory phospholipase A2 (hnsPLA) inhibitor with IC50 of 7 nM,. Phase 3.	Others	C21H20N2O5	Free Base	LY-333013	CCC1=C(C(=O)C(N)=O)C2=C(C=CC=C2OCC(O)=O)N1CC1=CC=CC=C1 |c:2,11,13,26,28,t:9,24|	3.078	4	1	8
S1111	Foretinib (GSK1363089)	632.65	849217-64-7	c-Met,VEGFR	http://www.selleckchem.com/products/XL880(GSK1363089,EXEL-2880).html	Foretinib (GSK1363089) is an ATP-competitive inhibitor of HGFR and VEGFR, mostly for Met and KDR with IC50 of 0.4 nM and 0.9 nM. Less potent against Ron, Flt-1/3/4, Kit, PDGFRα/β and Tie-2, and little activity to FGFR1 and EGFR. Phase 2.	Others	C34H34F2N4O6	Free Base	N/A	COC1=CC2=C(C=C1OCCCN1CCOCC1)N=CC=C2OC1=C(F)C=C(NC(=O)C2(CC2)C(=O)NC2=CC=C(F)C=C2)C=C1 |c:4,6,20,22,26,46,49,t:2,29,41,43|	4.437	7	2	12
S1112	SGX-523	359.41	1022150-57-7	c-Met	http://www.selleckchem.com/products/SGX-523.html	SGX-523 is a selective Met inhibitor with IC50 of 4 nM, no activity to BRAFV599E, c-Raf, Abl and p38α. Phase 1.	Others	C18H13N7S	Free Base	N/A	CN1C=C(C=N1)C1=NN2C(SC3=CC=C4N=CC=CC4=C3)=NN=C2C=C1 |c:2,4,16,18,21,23,25,28,t:7,12,14|	3.58	5	0	3
S1113	GSK690693	425.48	937174-76-0	Akt	http://www.selleckchem.com/products/GSK690693.html	GSK690693 is a pan-Akt inhibitor targeting Akt1/2/3 with IC50 of 2 nM/13 nM/9 nM, also sensitive to the AGC kinase family: PKA, PrkX and PKC isozymes. Phase 1.	Others	C21H27N7O3	Free Base	N/A	CCN1C(=NC2=C1C(OC[C@H]1CCCNC1)=CN=C2C#CC(C)(C)O)C1=NON=C1N |r,c:3,5,17,19,31,t:28|	1.839	6	2	7
S1114	JNJ-38877605	377.35	943540-75-8	c-Met	http://www.selleckchem.com/products/JNJ-38877605.html	JNJ-38877605 is an ATP-competitive inhibitor of c-Met with IC50 of 4 nM, 600-fold selective for c-Met than 200 other tyrosine and serine-threonine kinases. Phase 1.	Others	C19H13F2N7	Free Base	N/A	CN1C=C(C=N1)C1=NN2C(C=C1)=NN=C2C(F)(F)C1=CC2=C(C=C1)N=CC=C2 |c:2,4,11,13,15,23,25,28,30,t:7,21|	3.052	5	0	3
S1115	Odanacatib (MK-0822)	525.56	603139-19-1	Cysteine Protease	http://www.selleckchem.com/products/Odanacatib-(MK0822).html	Odanacatib (MK 0822) is a potent, selective, and neutral inhibitor of cathepsin K (human/rabbit) with IC50 of 0.2 nM/1 nM, and demonstrated high selectivity versus off-target cathepsin B, L, S. Phase 3.	Others	C25H27F4N3O3S	Free Base	MK0822	CC(C)(F)C[C@H](N[C@@H](C1=CC=C(C=C1)C1=CC=C(C=C1)S(C)(=O)=O)C(F)(F)F)C(=O)NC1(CC1)C#N |r,c:10,12,17,19,t:8,15|	3.978	3	2	10
S1117	Triciribine	320.3	35943-35-2	Akt	http://www.selleckchem.com/products/Triciribine.html	Triciribine is a DNA synthesis inhibitor, also inhibits Akt and HIV-1 with IC50 of 130 nM and 20 nM, respectively; does not inhibit PI3K/PDK1; 5000-fold less active in cells lacking adenosine kinase. Phase 1/2.	Others	C13H16N6O4	Free Base	N/A	CN1N=C(N)C2=CN([C@@H]3O[C@H](CO)[C@@H](O)[C@H]3O)C3=C2C1=NC=N3 |r,c:18,24,t:2,5,22|	-1.119	4	4	2
S1119	Cabozantinib (XL184, BMS-907351)	501.51	849217-68-1	TAM Receptor,c-Kit,c-Met,FLT3,Tie-2,VEGFR	http://www.selleckchem.com/products/XL184.html	Cabozantinib (XL184, BMS-907351) is a potent VEGFR2 inhibitor with IC50 of 0.035 nM and also inhibits c-Met, Ret, Kit, Flt-1/3/4, Tie2, and AXL with IC50 of 1.3 nM, 4 nM, 4.6 nM, 12 nM/11.3 nM/6 nM, 14.3 nM and 7 nM, respectively.	Others	C28H24FN3O5	Free Base	BMS-907351	COC1=CC2=C(C=C1OC)C(OC1=CC=C(NC(=O)C3(CC3)C(=O)NC3=CC=C(F)C=C3)C=C1)=CC=N2 |c:4,6,32,35,37,39,t:2,13,15,27,29|	4.342	6	2	8
S1120	Everolimus (RAD001)	958.22	159351-69-6	mTOR	http://www.selleckchem.com/products/Everolimus(RAD001).html	Everolimus (RAD001) is an mTOR inhibitor of FKBP12 with IC50 of 1.6-2.4 nM.	Others	C53H83NO14	Free Base	Certican, Zortress, Afinitor	CO[C@@H]1C[C@H](C[C@H](C)[C@@H]2CC(=O)[C@H](C)\C=C(C)\[C@@H](O)[C@@H](OC)C(=O)[C@H](C)C[C@H](C)\C=C\C=C\C=C(C)\[C@H](C[C@@H]3CC[C@@H](C)[C@@](O)(O3)C(=O)C(=O)N3CCCC[C@H]3C(=O)O2)OC)CC[C@H]1OCCO |r,c:14,33,t:29,31|	6.164	11	2	9
S1121	TW-37	573.7	877877-35-5	Bcl-2	http://www.selleckchem.com/products/TW-37.html	TW-37 is a novel nonpeptide inhibitor to recombinant Bcl-2, Bcl-xL and Mcl-1 with Ki of 0.29 μM, 1.11 μM and 0.26 μM, respectively.	Others	C33H35NO6S	Free Base	N/A	CC(C)C1=CC=CC=C1CC1=CC(C(=O)NC2=CC=C(C=C2)S(=O)(=O)C2=C(C=CC=C2)C(C)(C)C)=C(O)C(O)=C1O |c:5,7,19,21,29,31,41,t:3,11,17,27,37|	7.56	3	4	8
S1122	Mocetinostat (MGCD0103)	396.44	726169-73-9	HDAC	http://www.selleckchem.com/products/MGCD0103(Mocetinostat).html	Mocetinostat (MGCD0103) is a potent HDAC inhibitor with most potency for HDAC1 with IC50 of 0.15 μM, 2- to 10- fold selectivity against HDAC2, 3, and 11, and no activity to HDAC4, 5, 6, 7, and 8. Phase 1/2.	Others	C23H20N6O	Free Base	N/A	NC1=CC=CC=C1NC(=O)C1=CC=C(CNC2=NC=CC(=N2)C2=CC=CN=C2)C=C1 |c:3,5,19,21,26,28,31,t:1,11,13,17,24|	2.798	4	3	6
S1124	BMS-754807	461.49	1001350-96-4	c-Met,IGF-1R,Trk receptor	http://www.selleckchem.com/products/BMS-754807.html	BMS-754807 is a potent and reversible inhibitor of IGF-1R/InsR with IC50 of 1.8 nM/1.7 nM, less potent to Met, Aurora A/B, TrkA/B and Ron, and shows little activity to Flt3, Lck, MK2, PKA, PKC etc. Phase 1/2.	Others	C23H24FN9O	Free Base	N/A	C[C@]1(CCCN1C1=NN2C=CC=C2C(NC2=NNC(=C2)C2CC2)=N1)C(=O)NC1=CC=C(F)N=C1 |r,c:10,12,20,26,37,t:7,17,32,34|	4.069	5	3	6
S1129	SRT1720 HCl	506.02	1001645-58-4	Sirtuin	http://www.selleckchem.com/products/SRT1720.html	SRT1720 is a selective SIRT1 activator with EC50 of 0.16 μM, but is >230-fold less potent for SIRT2 and SIRT3.	Others	C25H24ClN7OS	Hydrochloride	N/A	Cl.O=C(NC1=CC=CC=C1C1=CN2C(CN3CCNCC3)=CSC2=N1)C1=NC2=CC=CC=C2N=C1 |c:5,7,21,25,32,34,37,t:3,10,28,30|	3.018	4	2	5
S1130	YM155 (Sepantronium Bromide)	443.29	781661-94-7	Survivin	http://www.selleckchem.com/products/YM155.html	YM155 is a potent survivin suppressant by inhibiting Survivin promoter activity with IC50 of 0.54 nM; does not significantly inhibit SV40 promoter activity, but is observed to slightly inhibit the interaction of Survivin with XIAP. Phase 1/2.	Others	C20H19BrN4O3	Bromide	N/A	[Br-].COCCN1C(C)=[N+](CC2=CN=CC=N2)C2=C1C(=O)C1=C(C=CC=C1)C2=O |c:11,13,16,23,25,t:6,9,21|	-0.733	5	0	5
S1132	INO-1001 (3-Aminobenzamide)	136.15	3544-24-9	PARP	http://www.selleckchem.com/products/INO-1001.html	INO-1001 is a potent inhibitor of PARP with IC50 of <50 nM in CHO cells and a mediator of oxidant-induced myocyte dysfunction during reperfusion. Phase 2.	Others	C7H8N2O	Free Base	N/A	NC(=O)C1=CC(N)=CC=C1 |c:6,8,t:3|	0.085	1	2	1
S1133	Alisertib (MLN8237)	518.92	1028486-01-2	Aurora Kinase	http://www.selleckchem.com/products/MLN8237.html	Alisertib (MLN8237) is a selective Aurora A inhibitor with IC50 of 1.2 nM. It has >200-fold higher selectivity for Aurora A than Aurora B. Phase 3.	Others	C27H20ClFN4O4	Free Base	Alisertib	COC1=C(C=CC(NC2=NC3=C(CN=C(C4=C3C=CC(Cl)=C4)C3=C(OC)C=CC=C3F)C=N2)=C1)C(O)=O |c:4,13,15,18,21,24,28,30,34,36,t:2,8,10|	5.954	6	1	6
S1134	AT9283	381.43	896466-04-9	Aurora Kinase,Bcr-Abl,JAK	http://www.selleckchem.com/products/AT9283.html	AT9283 is a potent JAK2/3 inhibitor with IC50 of 1.2 nM/1.1 nM; also potent to Aurora A/B, Abl(T315I). Phase 1/2.	Others	C19H23N7O2	Free Base	N/A	O=C(NC1CC1)NC1=CNN=C1C1=NC2=CC(CN3CCOCC3)=CC=C2N1 |c:11,26,28,t:8,14,16|	1.51	4	4	5
S1137	Malotilate	288.38	59937-28-9	Others	http://www.selleckchem.com/products/Malotilate.html	Malotilate is a liver protein metabolism improved compound.	Others	C12H16O4S2	Free Base	N/A	CC(C)OC(=O)C(C(=O)OC(C)C)=C1SC=CS1 |c:15|	2.363	4	0	6
S1138	Brivanib Alaninate (BMS-582664)	441.46	649735-63-7	FGFR,VEGFR	http://www.selleckchem.com/products/Brivanib-alaninate.html	Brivanib alaninate (BMS-582664) is the prodrug of BMS-540215, an ATP-competitive inhibitor against VEGFR2 with IC50 of 25 nM.	Others	C22H24FN5O4	Alaninate	N/A	C[C@H](COC1=CN2N=CN=C(OC3=C(F)C4=C(NC(C)=C4)C=C3)C2=C1C)OC(=O)[C@H](C)N |r,c:7,12,19,22,26,t:4,9,15|	3.383	6	2	8
S1139	ADL5859 HCl	428.95	850173-95-4	Opioid Receptor	http://www.selleckchem.com/products/ADL-5859.html	ADL5859 HCl is a δ-opioid receptor agonist with Ki of 0.8 nM, selectivity against opioid receptor κ, μ, and weak inhibitory activity at the hERG channel. Phase 2.	Others	C24H29ClN2O3	Hydrochloride	N/A	Cl.CCN(CC)C(=O)C1=CC=C(C=C1)C1=CC2(CCNCC2)OC2=CC=CC(O)=C12 |c:9,11,26,t:7,14,24,29|	3.196	2	2	4
S1140	Andarine	441.36	401900-40-1	Androgen Receptor	http://www.selleckchem.com/products/Andarine.html	Andarine is a selective non-steroidal androgen receptor (AR) agonist with Ki of 4 nM, tissue-selective for anabolic organs.	Others	C19H18F3N3O6	Free Base	GTX-007	CC(=O)NC1=CC=C(OC[C@](C)(O)C(=O)NC2=CC=C(C(=C2)C(F)(F)F)[N+]([O-])=O)C=C1 |r,c:18,20,30,t:4,6,16|	2.314	3	2	8
S1141	Tanespimycin (17-AAG)	585.69	75747-14-7	HSP (e.g. HSP90)	http://www.selleckchem.com/products/17-AAG(Geldanamycin).html	17-AAG is a potent HSP90 inhibitor with IC50 of 5 nM, having a 100-fold higher binding affinity for HSP90 derived from tumour cells than HSP90 from normal cells.	Others	C31H43N3O8	Free Base	N/A	CO[C@H]1C[C@H](C)CC2=C(NCC=C)C(=O)C=C(NC(=O)\C(C)=C\C=C/[C@H](OC)[C@@H](OC(N)=O)\C(C)=C\[C@H](C)[C@H]1O)C2=O |r,c:7,23,t:15,21,34|	2.524	7	4	7
S1142	Alvespimycin (17-DMAG) HCl	653.21	467214-21-7	HSP (e.g. HSP90)	http://www.selleckchem.com/products/17-DMAG,Hydrochloride-Salt.html	17-DMAG is a potent, water-soluble HSP90 inhibitor with IC50 of 62 nM.	Others	C32H49ClN4O8	Hydrochloride	NSC 707545	Cl.CO[C@H]1C[C@H](C)CC2=C(NCCN(C)C)C(=O)C=C(NC(=O)\C(C)=C\C=C/[C@H](OC)[C@@H](OC(N)=O)\C(C)=C\[C@H](C)[C@H]1O)C2=O |r,c:7,25,t:17,23,36|	2.428	7	4	8
S1143	AG-490 (Tyrphostin B42)	294.3	133550-30-8	EGFR,JAK	http://www.selleckchem.com/products/AG-490.html	AG-490 (Tyrphostin B42) is an inhibitor of EGFR with IC50 of 0.1 μM, 135-fold more selective for EGFR versus ErbB2, also inhibits JAK2 with no activity to Lck, Lyn, Btk, Syk and Src.	Others	C17H14N2O3	Free Base	N/A	OC1=C(O)C=C(\C=C(/C#N)C(=O)NCC2=CC=CC=C2)C=C1 |c:1,16,18,21,t:4,14|	2.444	1	3	4
S1144	Ivacaftor (VX-770)	392.49	873054-44-5	CFTR	http://www.selleckchem.com/products/VX-770.html	Ivacaftor (VX-770) is a potentiator of CFTR targeting G551D-CFTR and F508del-CFTR with EC50 of 100 nM and 25 nM, respectively.	Others	C24H28N2O3	Free Base	N/A	CC(C)(C)C1=CC(=C(NC(=O)C2=CNC3=C(C=CC=C3)C2=O)C=C1O)C(C)(C)C |c:16,18,24,t:4,6,11,14|	4.516	2	3	4
S1145	SNS-032 (BMS-387032)	380.53	345627-80-7	CDK	http://www.selleckchem.com/products/SNS-032.html	SNS-032 has firstly been described as a selective inhibitor of CDK2 with IC50 of 48 nM and is 10- and 20-fold selective over CDK1/CDK4. It is also found to be sensitive to CDK7/9 with IC50 of 62 nM/4 nM, with little effect on CDK6. Phase 1.	Others	C17H24N4O2S2	Free Base	BMS-387032	CC(C)(C)C1=CN=C(CSC2=CN=C(NC(=O)C3CCNCC3)S2)O1 |t:4,6,10,12|	2.07	4	2	6
S1147	Barasertib (AZD1152-HQPA)	507.56	722544-51-6	Aurora Kinase	http://www.selleckchem.com/products/AZD1152-HQPA.html	AZD1152-HQPA (Barasertib) is a highly selective Aurora B inhibitor with IC50 of 0.37 nM, ~100 fold more selective for Aurora B over Aurora A.	Others	C26H30FN7O3	Free Base	AZD1152	CCN(CCO)CCCOC1=CC=C2C(NC3=CC(CC(=O)NC4=CC=CC(F)=C4)=NN3)=NC=NC2=C1 |c:25,28,30,33,35,38,t:10,12,16,23|	3.493	5	4	13
S1148	Docetaxel	807.88	114977-28-5	Microtubule Associated	http://www.selleckchem.com/products/Docetaxel(Taxotere).html	Docetaxel, an analog of taxol, is an inhibitor of depolymerisation of microtubules by binding to stabilized microtubules.	Others	C43H53NO14	Free Base	N/A	CC(=O)O[C@@]12CO[C@@H]1C[C@H](O)[C@]1(C)C2[C@H](OC(=O)C2=CC=CC=C2)[C@]2(O)C[C@H](OC(=O)[C@H](O)[C@@H](NC(=O)OC(C)(C)C)C3=CC=CC=C3)C(C)=C([C@@H](O)C1=O)C2(C)C |r,c:22,24,47,49,t:20,45,53|	2.586	10	4	13
S1150	Paclitaxel	853.91	33069-62-4	Autophagy,Microtubule Associated	http://www.selleckchem.com/products/Paclitaxel(Taxol).html	Paclitaxel is a microtubule polymer stabilizer with IC50 of 0.1 pM in human endothelial cells.	Others	C47H51NO14	Free Base	N/A	CC(=O)O[C@@H]1C2=C(C)[C@H](C[C@@](O)([C@@H](OC(=O)C3=CC=CC=C3)C3[C@@]4(CO[C@@H]4C[C@H](O)[C@@]3(C)C1=O)OC(C)=O)C2(C)C)OC(=O)[C@H](O)[C@@H](NC(=O)C1=CC=CC=C1)C1=CC=CC=C1 |r,c:5,18,20,57,59,64,66,t:16,55,62|	3.055	11	3	14
S1152	PLX-4720	413.83	918505-84-7	Raf	http://www.selleckchem.com/products/PLX-4720.html	PLX4720 is a potent and selective inhibitor of B-RafV600E with IC50 of 13 nM, equally potent to c-Raf-1(Y340D and Y341D mutations), 10-fold selectivity for B-RafV600E than wild-type B-Raf.	Others	C17H14ClF2N3O3S	Free Base	N/A	CCCS(=O)(=O)NC1=CC=C(F)C(C(=O)C2=CNC3=NC=C(Cl)C=C23)=C1F |c:26,t:7,9,15,18,20,23|	3.435	4	2	6
S1153	Roscovitine (Seliciclib,CYC202)	354.45	186692-46-6	CDK	http://www.selleckchem.com/products/Roscovitine.html	Roscovitine (Seliciclib, CYC202) is a potent and selective CDK inhibitor for Cdc2, CDK2 and CDK5 with IC50 of 0.65 μM, 0.7 μM and 0.16 μM. It shows little effect on CDK4/6. Phase 2.	Others	C19H26N6O	Free Base	N/A	CC[C@H](CO)NC1=NC(NCC2=CC=CC=C2)=C2N=CN(C(C)C)C2=N1 |r,c:13,15,19,26,t:6,11,17|	3.32	3	3	8
S1154	SNS-314 Mesylate	527.04	1146618-41-8	Aurora Kinase	http://www.selleckchem.com/products/SNS-314.html	SNS-314 Mesylate is a potent and selective inhibitor of Aurora A, Aurora B and Aurora C with IC50 of 9 nM, 31 nM, and 3 nM, respectively. It is less potent to Trk A/B, Flt4, Fms, Axl, c-Raf and DDR2. Phase 1.	Others	C19H19ClN6O4S3	Mesylate	N/A	CS(O)(=O)=O.ClC1=CC=CC(NC(=O)NC2=NC=C(CCNC3=NC=NC4=C3SC=C4)S2)=C1 |c:7,23,25,29,33,t:5,14,16,21|	3.539	4	3	6
S1155	S3I-201	365.36	501919-59-1	STAT	http://www.selleckchem.com/products/S31-201.html	S3I-201 shows potent inhibition of STAT3 DNA-binding activity with IC50 of 86 μM, and low activity towards STAT1 and STAT5.	Others	C16H15NO7S	Free Base	N/A	CC1=CC=C(C=C1)S(=O)(=O)OCC(=O)NC1=CC=C(C(O)=O)C(O)=C1 |c:3,5,24,t:1,16,18|	1.712	3	2	6
S1156	Capecitabine	359.35	154361-50-9	DNA/RNA Synthesis	http://www.selleckchem.com/products/Capecitabine(Xeloda).html	Capecitabine is a tumor-selective fluoropyrimidine carbamate which achieves higher intratumoral 5-FU level with lower toxicity than 5-FU.	Others	C15H22FN3O6	Free Base	Captabin	CCCCCOC(=O)NC1=NC(=O)N(C=C1F)[C@@H]1O[C@H](C)[C@@H](O)[C@H]1O |r,c:14,t:9|	0.82	5	3	7
S1157	Delanzomib (CEP-18770)	413.28	847499-27-8	Proteasome	http://www.selleckchem.com/products/cep-18770.html	CEP-18770 is an orally active inhibitor of the chymotrypsin-like activity of proteasome with IC50 of 3.8 nM, with only marginal inhibition of the tryptic and peptidylglutamyl activities of the proteosome. Phase 1/2.	Others	C21H28BN3O5	Free Base	N/A	CC(C)[C@H](CNC(=O)[C@@H](NC(=O)C1=NC(=CC=C1)C1=CC=CC=C1)[C@@H](C)O)B(O)O |r,c:14,16,21,23,t:12,19|	2.646	3	3	9
S1158	MK-8245	467.25	1030612-90-8	Dehydrogenase	http://selleckchem.com/products/mk-8245.html	MK-8245 is an liver-targeting inhibitor of stearoyl-CoA desaturase (SCD) with IC50 of 1 nM for human SCD1 and 3 nM for both rat SCD1 and mouse SCD1, with anti-diabetic and anti-dyslipidemic efficacy. Phase 2.	Metabolism	C17H16BrFN6O4	Free Base	N/A	OC(=O)CN1N=NC(=N1)C1=CC(=NO1)N1CCC(CC1)OC1=CC(F)=CC=C1Br |c:5,7,12,27,29,t:10,24|	2.991	7	0	6
S1159	Ganetespib (STA-9090)	364.4	888216-25-9	HSP (e.g. HSP90)	http://www.selleckchem.com/products/ganetespib-sta-9090.html	Ganetespib is an HSP90 inhibitor with IC50 of 4 nM in OSA 8 cells, induces apoptosis of OSA cells while normal osteoblasts are not affected; active metabolite of STA-1474.	Others	C20H20N4O3	Free Base	N/A	CC(C)C1=C(O)C=C(O)C(=C1)C1=NNC(=O)N1C1=CC2=C(C=C1)N(C)C=C2 |c:3,9,21,23,28,t:6,12,19|	3.866	2	3	3
S1162	PA-824	359.26	187235-37-6	Antifection	http://www.selleckchem.com/products/pa-824.html	PA-824 is an anti-tuberculosis drug for tuberculosis with MIC less than 2.8 μM.	Others	C14H12F3N3O5	Free Base	N/A	[O-][N+](=O)C1=CN2C[C@@H](COC2=N1)OCC1=CC=C(OC(F)(F)F)C=C1 |r,c:11,25,t:3,16,18|	4.301	4	0	6
S1163	Onalespib (AT13387)	409.52	912999-49-6	HSP (e.g. HSP90)	http://www.selleckchem.com/products/at13387.html	AT13387 is a selective potent Hsp90 inhibitor with IC50 of 18 nM in A375 cells, displays a long duration of anti-tumor activity.	Others	C24H31N3O3	Free Base	N/A	CC(C)C1=C(O)C=C(O)C(=C1)C(=O)N1CC2=C(C1)C=C(CN1CCN(C)CC1)C=C2 |c:3,9,16,31,t:6,20|	3.322	1	2	4
S1164	Lenvatinib (E7080)	426.85	417716-92-8	VEGFR	http://www.selleckchem.com/products/E7080.html	E7080 (Lenvatinib) is a multi-target inhibitor, mostly for VEGFR2(KDR)/VEGFR3(Flt-4) with IC50 of 4 nM/5.2 nM, less potent against VEGFR1/Flt-1, ~10-fold more selective for VEGFR2/3 against FGFR1, PDGFRα/β. Phase 3.	Protein Tyrosine Kinase	C21H19ClN4O4	Free Base	N/A	COC1=C(C=C2C(OC3=CC(Cl)=C(NC(=O)NC4CC4)C=C3)=CC=NC2=C1)C(N)=O |c:21,23,25,28,t:2,4,8,11|	2.832	5	3	6
S1165	ABT-751 (E7010)	371.41	141430-65-1	Microtubule Associated	http://www.selleckchem.com/products/ABT-751.html	ABT-751 (E7010) binds to the colchicine site on β-tubulin and inhibits polymerization of microtubules, not a substrate for the MDR transporter and is active against cell lines resistant to vincristine, doxorubicin, and cisplatin. Phase 1/2.	Cytoskeletal Signaling	C18H17N3O4S	Free Base	N/A	COC1=CC=C(C=C1)S(=O)(=O)NC1=C(NC2=CC=C(O)C=C2)N=CC=C1 |c:4,6,13,21,24,26,t:2,16,18|	2.997	4	3	6
S1167	CP-724714	469.53	537705-08-1	EGFR,HER2	http://www.selleckchem.com/products/CP-724714.html	CP-724,714 is a potent, selective inhibitor of HER2/ErbB2 with IC50 of 10 nM, >640-fold selectivity against EGFR, InsR, IRG-1R, PDGFR, VEGFR2, Abl, Src, c-Met etc. Phase 2.	Protein Tyrosine Kinase	C27H27N5O3	Free Base	N/A	COCC(=O)NC\C=C\C1=CC=C2N=CN=C(NC3=CC=C(OC4=CC=C(C)N=C4)C(C)=C3)C2=C1 |c:13,28,32,36,t:9,11,15,18,20,23,25|	3.987	6	2	9
S1168	Valproic acid sodium salt (Sodium valproate)	166.19	1069-66-5	GABA Receptor,HDAC,Autophagy	http://www.selleckchem.com/products/Sodium-valproate.html	Valproic acid sodium salt (Sodium valproate) is a HDAC inhibitor with IC50 of 0.4 mM and also inhibits GABA-transaminase or succinic semialdehyde dehydrogenase.	Neuronal Signaling	C8H15NaO2	Sodium salt	N/A	[Na+].CCCC(CCC)C([O-])=O	1.275	0	0	5
S1169	TGX-221	364.44	663619-89-4	PI3K	http://www.selleckchem.com/products/TGX-221.html	TGX-221 is a p110β-specific inhibitor with IC50 of 5 nM, 1000-fold more selective for p110β than p110α.	PI3K/Akt/mTOR	C21H24N4O2	Free Base	N/A	CC(NC1=CC=CC=C1)C1=CC(C)=CN2C(=O)C=C(N=C12)N1CCOCC1 |c:5,7,13,18,t:3,10,20|	2.373	3	1	4
S1170	WZ3146	464.95	1214265-56-1	EGFR	http://www.selleckchem.com/products/WZ3146.html	WZ3146 is a mutant-selective irreversible inhibitor of EGFR(L858R) and EGFR(E746_A750) with IC50 of 2 nM and 2 nM; does not inhibit ERBB2 phosphorylation (T798I).	Protein Tyrosine Kinase	C24H25ClN6O2	Free Base	N/A	CN1CCN(CC1)C1=CC=C(NC2=NC=C(Cl)C(OC3=CC(NC(=O)C=C)=CC=C3)=N2)C=C1 |c:27,29,31,34,t:8,10,13,15,20|	4.823	4	2	7
S1171	CYC116	368.46	693228-63-6	Aurora Kinase,VEGFR	http://www.selleckchem.com/products/CYC116.html	CYC116 is a potent inhibitor of Aurora A/B with Ki of 8.0 nM/9.2 nM, is less potent to VEGFR2 (Ki of 44 nM), with 50-fold greater potency than CDKs, not active against PKA, Akt/PKB, PKC, no effect on GSK-3α/β, CK2, Plk1 and SAPK2A. Phase 1.	Cell Cycle	C18H20N6OS	Free Base	N/A	CC1=C(SC(N)=N1)C1=NC(NC2=CC=C(C=C2)N2CCOCC2)=NC=C1 |c:5,14,16,25,27,t:1,8,12|	2.743	4	2	4
S1172	JNJ-26854165 (Serdemetan)	328.41	881202-45-5	E3 Ligase ,p53	http://www.selleckchem.com/products/JNJ-26854165.html	JNJ-26854165 acts as a HDM2 ubiquitin ligase antagonist and also induces early apoptosis in p53 wild-type cells, inhibits cellular proliferation followed by delayed apoptosis in the absence of functional p53. Phase 1.	Apoptosis	C21H20N4	Free Base	N/A	C(CC1=CNC2=CC=CC=C12)NC1=CC=C(NC2=CC=NC=C2)C=C1 |c:7,21,23,26,t:2,5,9,14,16,19|	4.236	1	3	6
S1173	WZ4002	494.18	1213269-23-8	EGFR	http://www.selleckchem.com/products/WZ4002.html	WZ4002 is a novel, mutant-selective EGFR inhibitor for EGFR(L858R)/(T790M) with IC50 of 2 nM/8 nM; does not inhibit ERBB2 phosphorylation (T798I).	Protein Tyrosine Kinase	C25H27ClN6O3	Free Base	N/A	COC1=C(NC2=NC=C(Cl)C(OC3=CC(NC(=O)C=C)=CC=C3)=N2)C=CC(=C1)N1CCN(C)CC1 |c:2,19,21,23,26,28,t:5,7,12|	4.807	5	2	8
S1174	MK-2866 (GTx-024)	389.33	841205-47-8	Androgen Receptor	http://www.selleckchem.com/products/Ostarine.html	MK-2866 (GTx-024) is a selective androgen receptor modulator (SARM) with Ki of 3.8 nM, and is tissue-selective for anabolic organs. Phase 3.	Endocrinology & Hormones	C19H14F3N3O3	Free Base	GTx-024, MK-2866	C[C@](O)(COC1=CC=C(C=C1)C#N)C(=O)NC1=CC=C(C#N)C(=C1)C(F)(F)F |r,c:7,9,23,t:5,17,19|	3.057	2	1	6
S1175	BIIB021	318.76	848695-25-0	HSP (e.g. HSP90)	http://www.selleckchem.com/products/BIIB021.html	BIIB021 is an orally available, fully synthetic small-molecule inhibitor of HSP90 with Ki and EC50 of 1.7 nM and 38 nM, respectively.	Cytoskeletal Signaling	C14H15ClN6O	Free Base	CNF2024	COC1=C(C)C=NC(CN2C=NC3=C(Cl)N=C(N)N=C23)=C1C |c:2,5,10,12,21,t:15,18|	2.223	5	1	3
S1176	Plinabulin (NPI-2358)	336.39	714272-27-2	VDA	http://www.selleckchem.com/products/NPI-2358.html	Plinabulin (NPI-2358) is a <b>vascular disrupting agent (VDA)</b> against tubulin-depolymerizing with <b>IC50</b> of 9.8~18 nM in tumor cells. Phase 1/2.	Angiogenesis	C19H20N4O2	Free Base	N/A	CC(C)(C)C1=C(\C=C2/NC(=O)\C(NC2=O)=C\C2=CC=CC=C2)N=CN1 |c:4,19,21,24,t:17|	1.921	3	3	3
S1177	PD98059	267.28	167869-21-8	MEK	http://www.selleckchem.com/products/PD-98059.html	PD98059 is a non-ATP competitive MEK inhibitor with IC50 of 2 μM, specifically inhibits MEK-1-mediated activation of MAPK; does not directly inhibit ERK1 or ERK2.	MAPK	C16H13NO3	Free Base	N/A	COC1=C(N)C(=CC=C1)C1=CC(=O)C2=CC=CC=C2O1 |c:2,5,7,16,18,t:10,14|	2.373	3	1	2
S1178	Regorafenib (BAY 73-4506)	482.82	755037-03-7	c-RET,VEGFR	http://www.selleckchem.com/products/BAY-73-4506.html	Regorafenib (BAY 73-4506) is a multi-target inhibitor for VEGFR1, VEGFR2, VEGFR3, PDGFRβ, Kit, RET and Raf-1 with IC50 of 13 nM/4.2 nM/46 nM, 22 nM, 7 nM, 1.5 nM and 2.5 nM, respectively.	Protein Tyrosine Kinase	C21H15ClF4N4O3	Free Base	BAY 73-4506	CNC(=O)C1=CC(OC2=CC(F)=C(NC(=O)NC3=CC=C(Cl)C(=C3)C(F)(F)F)C=C2)=CC=N1 |c:22,29,31,33,t:4,8,11,17,19|	4.381	4	3	6
S1179	WZ8040	481.01	1214265-57-2	EGFR	http://www.selleckchem.com/products/WZ8040.html	WZ8040 is a novel mutant-selective irreversible EGFRT790M inhibitor, does not inhibit ERBB2 phosphorylation (T798I).	Protein Tyrosine Kinase	C24H25ClN6OS	Free Base	N/A	CN1CCN(CC1)C1=CC=C(NC2=NC=C(Cl)C(SC3=CC(NC(=O)C=C)=CC=C3)=N2)C=C1 |c:27,29,31,34,t:8,10,13,15,20|	5.381	3	2	7
S1180	XAV-939	312.31	284028-89-3	Wnt/beta-catenin	http://www.selleckchem.com/products/XAV-939.html	XAV-939 selectively inhibits Wnt/β-catenin-mediated transcription through tankyrase1/2 inhibition with IC50 of 11 nM/4 nM, regulates axin levels and does not affect CRE, NF-κB or TGF-β.	Stem Cells & Wnt	C14H11F3N2OS	Free Base	N/A	OC1=C2CSCCC2=NC(=N1)C1=CC=C(C=C1)C(F)(F)F |c:1,8,10,15,17,t:13|	3.676	2	1	2
S1181	ENMD-2076	375.47	934353-76-1	Aurora Kinase,FLT3,VEGFR	http://www.selleckchem.com/products/ENMD-2076.html	ENMD-2076 has selective activity against Aurora A and Flt3 with IC50 of 14 nM and 1.86 nM, 25-fold selective for Aurora A than over Aurora B and less potent to VEGFR2/KDR and VEGFR3, FGFR1 and FGFR2 and PDGFRα. Phase 2.	Angiogenesis	C21H25N7	Tartaric Acid	N/A	CN1CCN(CC1)C1=CC(NC2=NNC(C)=C2)=NC(\C=C\C2=CC=CC=C2)=N1 |c:16,18,25,27,29,t:8,12,23|	4.015	3	2	5
S1183	Danoprevir (ITMN-191)	731.83	850876-88-9, 916881-67-9, 1001913-18-3, 1225266-12-5	HCV Protease	http://www.selleckchem.com/products/Danoprevir.html	Danoprevir(ITMN-191) is a peptidomimetic inhibitor of the NS3/4A protease of hepatitis C virus (HCV) with IC50 of 0.2-3.5 nM, inhibition effect for HCV genotypes 1A/1B/4/5/6 is ~10-fold higher than 2B/3A. Phase 2.	Proteases	C35H46FN5O9S	Free Base	RG7227, ITMN-191, RO5190591	CC(C)(C)OC(=O)N[C@H]1CCCCC\C=C/[C@@H]2C[C@]2(NC(=O)[C@@H]2C[C@H](CN2C1=O)OC(=O)N1CC2=C(C1)C(F)=CC=C2)C(=O)NS(=O)(=O)C1CC1 |r,c:14,37,42,44|	2.922	9	3	8
S1185	Ritonavir	720.94	155213-67-5	HIV Protease,P450 (e.g. CYP17)	http://www.selleckchem.com/products/Ritonavir.html	Ritonavir is an antiretroviral drug which inhibits a particular liver enzyme that normally metabolizes protease inhibitors, cytochrome P450-3A4 (CYP3A4).	Proteases	C37H48N6O5S2	Free Base	Norvir, Norvir Softgel	CC(C)[C@H](NC(=O)N(C)CC1=CSC(=N1)C(C)C)C(=O)N[C@H](C[C@H](O)[C@H](CC1=CC=CC=C1)NC(=O)OCC1=CN=CS1)CC1=CC=CC=C1 |r,c:13,30,32,42,49,51,t:10,28,40,47|	4.978	6	4	18
S1186	BIBR 1532	331.36	321674-73-1	Telomerase	http://www.selleckchem.com/products/BIBR1532.html	BIBR 1532 is a potent, selective, non-competitive telomerase inhibitor with IC50 of 100 nM.	DNA Damage	C21H17NO3	Free Base	N/A	CC(=C/C(=O)NC1=C(C=CC=C1)C(O)=O)\C1=CC2=CC=CC=C2C=C1 |c:8,10,20,22,25,t:6,16,18|	4.067	2	1	4
S1188	Anastrozole	293.37	120511-73-1	Aromatase	http://www.selleckchem.com/products/Anastrozole.html	Anastrozole is a third-generation nonsteroidal selective aromatase inhibitor.	Endocrinology & Hormones	C17H19N5	Free Base	Arimidex	CC(C)(C#N)C1=CC(=CC(CN2C=NC=N2)=C1)C(C)(C)C#N |c:7,12,14,16,t:5|	2.965	2	0	4
S1189	Aprepitant	534.43	170729-80-3	Substance P	http://www.selleckchem.com/products/Aprepitant.html	Aprepitant is a potent and selective neurokinin-1 receptor antagonist.	Others	C23H21F7N4O3	Free Base	MK-0869, MK-869, L-754030, Emend	C[C@@H](O[C@H]1OCCN(CC2=NNC(=O)N2)[C@H]1C1=CC=C(F)C=C1)C1=CC(=CC(=C1)C(F)(F)F)C(F)(F)F |r,c:23,28,30,t:9,18,20,26|	4.635	4	2	8
S1190	Bicalutamide	430.37	90357-06-5	Androgen Receptor	http://www.selleckchem.com/products/Bicalutamide(Casodex).html	Bicalutamide is an androgen receptor (AR) antagonist with IC50 of 0.16 μM.	Endocrinology & Hormones	C18H14F4N2O4S	Free Base	N/A	CC(O)(CS(=O)(=O)C1=CC=C(F)C=C1)C(=O)NC1=CC=C(C#N)C(=C1)C(F)(F)F |c:12,24,t:7,9,18,20|	2.926	3	1	6
S1191	Fulvestrant	606.77	129453-61-8	Estrogen/progestogen Receptor	http://www.selleckchem.com/products/Fulvestrant.html	Fulvestrant is an estrogen receptor (ER) antagonist with IC50 of 0.094 nM.	Endocrinology & Hormones	C32H47F5O3S	Free Base	N/A	[H][C@@]12CC[C@H](O)[C@@]1(C)CC[C@]1([H])C3=C(C[C@@H](CCCCCCCCCS(=O)CCCC(F)(F)C(F)(F)F)[C@@]21[H])C=C(O)C=C3 |r,c:13,45,t:42|	8.437	1	2	15
S1192	Raltitrexed	458.49	112887-68-0	DNA/RNA Synthesis	http://www.selleckchem.com/products/Raltitrexed.html	Raltitrexed is a thymidylate synthase inhibitor with an IC50 of 9 nM for the inhibition of L1210 cell growth.	DNA Damage	C21H22N4O6S	Free Base	N/A	CN(CC1=CC2=C(C=C1)N=C(C)NC2=O)C1=CC=C(S1)C(=O)N[C@@H](CCC(O)=O)C(O)=O |r,c:5,7,19,t:3,10,17|	1.528	5	2	9
S1193	Thalidomide	258.23	50-35-1	E3 Ligase ,TNF-alpha	http://www.selleckchem.com/products/Thalidomide.html	Thalidomide was introduced as a sedative drug, immunomodulatory agent and also is investigated for treating symptoms of many cancers. Thalidomide inhibits an E3 ubiquitin ligase, which is a CRBN-DDB1-Cul4A complex.Phase 3.	Apoptosis	C13H10N2O4	Free Base	Thalomid	O=C1N(C2CCC(=O)NC2=O)C(=O)C2=C1C=CC=C2 |c:14,17,19|	0.097	4	1	1
S1194	CUDC-101	434.49	1012054-59-9	EGFR,HDAC,HER2	http://www.selleckchem.com/products/CUDC-101.html	CUDC-101 is a potent multi-targeted inhibitor against HDAC, EGFR and HER2 with IC50 of 4.4 nM, 2.4 nM, and 15.7 nM, and inhibits class I/II HDACs, but not class III, Sir-type HDACs. Phase 1.	Epigenetics	C24H26N4O4	Free Base	N/A	COC1=CC2=C(C=C1OCCCCCCC(=O)NO)C(NC1=CC(=CC=C1)C#C)=NC=N2 |c:4,6,24,26,30,32,t:2,22|	5.376	5	2	11
S1195	TAK-700 (Orteronel)	307.35	566939-85-3	P450 (e.g. CYP17)	http://www.selleckchem.com/products/TAK-700.html	TAK-700 (Orteronel) is a potent and highly selective human 17,20-lyase inhibitor with IC50 of 38 nM, exhibits >1000-fold selectivity over other CYPs (e.g. 11-hydroxylase and CYP3A4). Phase 3.	Metabolism	C18H17N3O2	Free Base	TAK700	CNC(=O)C1=CC=C2C=C(C=CC2=C1)C1(O)CCN2C=NC=C12 |c:8,10,13,21,t:4,6,23|	1.075	2	1	2
S1196	Exemestane	296.4	107868-30-4	Aromatase	http://www.selleckchem.com/products/Exemestane.html	Exemestane is an aromatase inhibitor, inhibits human placental and rat ovarian aromatase with IC50 of 30 nM and 40 nM, respectively.	Endocrinology & Hormones	C20H24O2	Free Base	Aromasin	[H][C@@]12CCC(=O)[C@@]1(C)CC[C@@]1([H])[C@@]2([H])CC(=C)C2=CC(=O)C=C[C@]12C |r,c:23,t:19|	3.606	2	0	0
S1197	Finasteride	372.54	98319-26-7	5-alpha Reductase	http://www.selleckchem.com/products/Finasteride.html	Finasteride is an inhibitor of steroid Type II 5α-reductase.	Endocrinology & Hormones	C23H36N2O2	Free Base	N/A	[H][C@@]12CC[C@H](C(=O)NC(C)(C)C)[C@@]1(C)CC[C@@]1([H])[C@@]2([H])CC[C@@]2([H])NC(=O)C=C[C@]12C |r,c:29|	3.174	2	2	2
S1198	Irinotecan	586.68	97682-44-5	Topoisomerase	http://www.selleckchem.com/products/Irinotecan.html	Irinotecan is a topoisomerase I inhibitor for LoVo cells and HT-29 cells with IC50 of 15.8 μM and 5.17 μM, respectively.	DNA Damage	C33H38N4O6	Free Base	Camptosar, Campto	CCC1=C2C=C(OC(=O)N3CCC(CC3)N3CCCCC3)C=CC2=NC2=C1CN1C2=CC2=C(COC(=O)[C@]2(O)CC)C1=O |r,c:2,23,26,28,t:4,34,36|	3.686	6	0	5
S1199	Cladribine	285.69	4291-63-8	DNA/RNA Synthesis	http://www.selleckchem.com/products/Cladribine.html	Cladribine is an adenosine deaminase inhibitor for U266, RPMI8226, and MM1.S cells with IC50 of approximately 2.43 μM, 0.75 μM, and 0.18 μM, respectively.	DNA Damage	C10H12ClN5O3	Free Base	Leustatin	NC1=NC(Cl)=NC2=C1N=CN2[C@H]1C[C@H](O)[C@@H](CO)O1 |r,c:4,6,9,t:1|	-0.259	4	3	2
S1200	Decitabine	228.21	2353-33-5	DNA Methyltransferase	http://www.selleckchem.com/products/Decitabine.html	Decitabine is a potent inhibitor of DNA methylation with IC50 of 438 nM and 4.38 nM in HL-60 and KG1a cells, respectively.	Epigenetics	C8H12N4O4	Free Base	Dacogen	NC1=NC(=O)N(C=N1)[C@H]1C[C@H](O)[C@@H](CO)O1 |r,c:6,t:1|	-1.093	4	3	2
S1201	Dimesna	326.34	16208-51-8	Others	http://www.selleckchem.com/products/Dimesna.html	Dimesna is an uroprotective agent used to decrease urotoxicity.	Others	C4H8Na2O6S4	Disodium salt	BNP7787, Tavocept, BioNumerik	[Na+].[Na+].[O-]S(=O)(=O)CCSSCCS([O-])(=O)=O	-4.295	0	0	7
S1202	Dutasteride	528.53	164656-23-9	5-alpha Reductase	http://www.selleckchem.com/products/Dutasteride.html	Dutasteride is a dual 5-α reductase inhibitor that inhibits conversion of testosterone to dihydrotestosterone (DHT).	Endocrinology & Hormones	C27H30F6N2O2	Free Base	Avodart	[H][C@@]12CC[C@H](C(=O)NC3=CC(=CC=C3C(F)(F)F)C(F)(F)F)[C@@]1(C)CC[C@@]1([H])[C@@]2([H])CC[C@@]2([H])NC(=O)C=C[C@]12C |r,c:10,12,40,t:8|	5.703	2	2	4
S1204	Melatonin	232.28	73-31-4	MT Receptor	http://www.selleckchem.com/products/Melatonin.html	Melatonin is a hormone produced in the brain by the pineal gland from the amino acid tryptophan.	Others	C13H16N2O2	Free Base	Melatonex	COC1=CC2=C(NC=C2CCNC(C)=O)C=C1 |c:7,16,t:2,4|	1.555	2	2	4
S1205	PIK-75 HCl	488.74	372196-77-5	DNA-PK,PI3K	http://www.selleckchem.com/products/PIK-75-Hydrochloride.html	PIK-75 is a p110α inhibitor with IC50 of 5.8 nM (200-fold more potently than p110β), isoform-specific mutants at Ser773, and also potently inhibits DNA-PK with IC50 of 2 nM.	PI3K/Akt/mTOR	C16H15BrClN5O4S	Hydrochloride	N/A	Cl.CN(\N=C\C1=CN=C2C=CC(Br)=CN12)S(=O)(=O)C1=C(C)C=CC(=C1)[N+]([O-])=O |c:8,11,19,22,24,t:4,6|	3.272	4	0	5
S1206	Bisoprolol fumarate	441.52	104344-23-2	Adrenergic Receptor	http://www.selleckchem.com/products/Bisoprolol-Fumarate.html	Bisoprolol fumarate is a selective type β1 adrenergic receptor blocker.	Neuronal Signaling	C22H35NO8	fumarate	Zebeta	OC(=O)\C=C\C(O)=O.CC(C)NCC(O)COC1=CC=C(COCCOC(C)C)C=C1 |c:28,t:16,18|	-0.635	5	2	14
S1207	Tivozanib (AV-951)	454.86	475108-18-0	c-Kit,PDGFR,VEGFR	http://www.selleckchem.com/products/AV-951.html	Tivozanib (AV-951) is a potent and selective VEGFR inhibitor for VEGFR1/2/3 with IC50 of 30 nM/6.5 nM/15 nM, and also inhibits PDGFR and c-Kit, low activity observed against FGFR-1, Flt3, c-Met EGFR and IGF-1R. Phase 3.	Protein Tyrosine Kinase	C22H19ClN4O5	Free Base	N/A	COC1=CC2=C(C=C1OC)C(OC1=CC=C(NC(=O)NC3=NOC(C)=C3)C(Cl)=C1)=CC=N2 |c:4,6,25,29,31,33,t:2,13,15,21|	4.039	7	2	6
S1208	Doxorubicin (Adriamycin) HCl	579.98	25316-40-9	Autophagy,Topoisomerase	http://www.selleckchem.com/products/Adriamycin.html	Doxorubicin (Adriamycin) is an antibiotic agent that inhibits DNA topoisomerase II and induces DNA damage and apoptosis.	DNA Damage	C27H30ClNO11	Hydrochloride	N/A	Cl.[H][C@@]1(C[C@H](N)[C@H](O)[C@H](C)O1)O[C@H]1C[C@@](O)(CC2=C(O)C3=C(C(=O)C4=C(OC)C=CC=C4C3=O)C(O)=C12)C(=O)CO |r,c:17,24,28,30,t:20,37|	0.338	6	5	5
S1209	Fluorouracil (5-Fluoracil, 5-FU)	130.08	51-21-8	DNA/RNA Synthesis	http://www.selleckchem.com/products/Adrucil(Fluorouracil).html	Fluorouracil (5-Fluoracil, 5-FU) is an DNA/RNA synthesis inhibitor, which interrupts nucleotide synthetic by inhibiting thymidylate synthase (TS).	DNA Damage	C4H3FN2O2	Free Base	5-FU, Carac, Efudex, Fluoroplex	FC1=CNC(=O)NC1=O |t:1|	-1.102	2	2	0
S1210	Methotrexate	454.44	59-05-2	DHFR	http://www.selleckchem.com/products/Abitrexate.html	Methotrexate is an antimetabolite and antifolate drug, which acts by inhibiting the metabolism of folic acid.	Metabolism	C20H22N8O5	Free Base	Methotrexate, Rheumatrex, Trexall	CN(CC1=NC2=C(N)N=C(N)N=C2N=C1)C1=CC=C(C=C1)C(=O)N[C@@H](CCC(O)=O)C(O)=O |r,c:5,11,14,19,21,t:3,8,17|	0.114	7	3	9
S1211	Imiquimod	240.3	99011-02-6	Immunology & Inflammation related	http://selleckchem.com/products/Imiquimod.html	Imiquimod is a novel synthetic agent with immune response modifying activity.	Angiogenesis	C14H16N4	Free Base	Aldara	CC(C)CN1C=NC2=C(N)N=C3C=CC=CC3=C12 |c:5,7,12,14,t:10,17|
S1212	Bendamustine HCl	394.72	3543-75-7	DNA/RNA Synthesis	http://www.selleckchem.com/products/Bendamustine-Hydrochloride.html	Bendamustine HCL is a DNA-damaging agent with IC50 of 50 μM.	Others	C16H22Cl3N3O2	Hydrochloride	Ribomustin, Treanda, SDX-105	Cl.CN1C(CCCC(O)=O)=NC2=CC(=CC=C12)N(CCCl)CCCl |c:8,12,t:10,14|	3.988	2	0	9
S1213	Nelarabine	297.27	121032-29-9	DNA/RNA Synthesis	http://www.selleckchem.com/products/Arranon.html	Nelarabine is a purine nucleoside analog and DNA synthesis inhibitor with IC50 from 0.067-2.15 μM in tumor cells.	DNA Damage	C11H15N5O5	Free Base	Arranon	COC1=NC(N)=NC2=C1N=CN2[C@@H]1O[C@H](CO)[C@@H](O)[C@@H]1O |r,c:5,7,10,t:2|	-1.376	5	4	3
S1214	Bleomycin Sulfate	1512.62	9041-93-4	DNA/RNA Synthesis	http://www.selleckchem.com/products/Bleomycin-sulfate.html	Bleomycin Sulfate is a glycopeptide antibiotic and an anticancer agent for squamous cell carcinomas (SCC) with IC50 of 4 nM in UT-SCC-19A cells.	DNA Damage	C55H85N17O25S4	Sulfate	Blenoxane	OS([O-])(=O)=O.[H][C@]1(O[C@H]2O[C@H](CO)[C@@H](O)[C@H](OC(N)=O)[C@@H]2O)[C@@H](OC([C@H](NC(=O)C2=C(C)C(N)=NC(=N2)[C@H](CC(N)=O)NC[C@@H](N)C(N)=O)C(=O)N[C@@H](C)[C@H](O)[C@@H](C)C(=O)N[C@H]([C@@H](C)O)C(=O)NCCC2=NC(=CS2)C2=NC(=CS2)C(=O)NCCC[S+](C)C)C2=CNC=N2)O[C@H](CO)[C@H](O)[C@H]1O |r,c:29,33,35,73,79,95,t:71,77,92|	-10.534	18	20	36
S1216	PFI-1 (PF-6405761)	347.39	1403764-72-6	Epigenetic Reader Domain	http://www.selleckchem.com/products/pfl-1.html	PFI-1 is a selective BET (bromodomain-containing protein) inhibitor for BRD4 with IC50 of 0.22 μM.	Epigenetics	C16H17N3O4S	Free Base	PF-06405761	COC1=C(C=CC=C1)S(=O)(=O)NC1=CC=C2NC(=O)N(C)CC2=C1 |c:4,6,24,t:2,13,15|	1.376	4	2	4
S1218	Clofarabine	303.68	123318-82-1	DNA/RNA Synthesis	http://www.selleckchem.com/products/Clofarabine.html	Clofarabine inhibits the enzymatic activities of ribonucleotide reductase (IC50 = 65 nM) and DNA polymerase.	DNA Damage	C10H11ClFN5O3	Free Base	Clolar, Evoltra	NC1=C2N=CN([C@@H]3O[C@H](CO)[C@@H](O)[C@@H]3F)C2=NC(Cl)=N1 |r,c:1,3,17,20|	-0.085	4	3	2
S1219	YM201636	467.48	371942-69-7	PI3K	http://www.selleckchem.com/products/ym201636.html	YM201636 is a selective PIKfyve inhibitor with IC50 of 33 nM, less potent to p110α and insensitive to Fabl (yeast orthologue).	PI3K/Akt/mTOR	C25H21N7O3	Free Base	N/A	NC1=CC=C(C=N1)C(=O)NC1=CC=CC(=C1)C1=NC(N2CCOCC2)=C2OC3=NC=CC=C3C2=N1 |c:3,5,13,15,32,34,38,t:1,11,18,27,30|	2.467	7	2	4
S1220	OSI-930	443.44	728033-96-3	c-Kit,CSF-1R,VEGFR	http://www.selleckchem.com/products/OSI-930.html	OSI-930 is a potent inhibitor of Kit, KDR and CSF-1R with IC50 of 80 nM, 9 nM and 15 nM, respectively; also potent to Flt-1, c-Raf and Lck and low activity against PDGFRα/β, Flt-3 and Abl. Phase 1.	Protein Tyrosine Kinase	C22H16F3N3O2S	Free Base	N/A	FC(F)(F)OC1=CC=C(NC(=O)C2=C(NCC3=CC=NC4=CC=CC=C34)C=CS2)C=C1 |c:12,18,22,28,32,t:5,7,16,20,24|	6.266	3	2	7
S1221	Dacarbazine	182.18	4342-03-4	DNA/RNA Synthesis	http://www.selleckchem.com/products/Dacarbazine.html	Dacarbazine is an antineoplastic chemotherapy drug used in the treatment of various cancers.	DNA Damage	C6H10N6O	Free Base	DTIC	CN(C)\N=N\C1=C(N=CN1)C(N)=O |c:7,t:5|	-0.344	4	2	3
S1222	Dexrazoxane HCl (ICRF-187, ADR-529)	304.73	149003-01-0	Others	http://www.selleckchem.com/products/Dexrazoxane-Hydrochloride.html	A cardioprotective agent	Others	C11H17ClN4O4	Hydrochloride	Totect, ICRF-187, Zinecard, Cardioxane	Cl.C[C@@H](CN1CC(=O)NC(=O)C1)N1CC(=O)NC(=O)C1 |r|	-1.722	4	2	3
S1223	Epirubicin HCl	579.98	56390-09-1	Topoisomerase	http://www.selleckchem.com/products/Ellence.html	Epirubicin HCl, a semisynthetic L-arabino derivative of doxorubicin, is an antineoplastic agent by inhibiting Topoisomerase.	DNA Damage	C27H30ClNO11	Hydrochloride	Ellence, Pharmorubicin, Epirubicin Ebewe	Cl.[H][C@@]1(C[C@H](N)[C@@H](O)[C@H](C)O1)O[C@H]1C[C@@](O)(CC2=C(O)C3=C(C(=O)C4=C(OC)C=CC=C4C3=O)C(O)=C12)C(=O)CO |r,c:17,24,28,30,t:20,37|	0.338	6	5	5
S1224	Oxaliplatin	397.29	61825-94-3	DNA/RNA Synthesis	http://www.selleckchem.com/products/Eloxatin.html	Oxaliplatin inhibits DNA synthesis by conforming DNA adducts.	DNA Damage	C8H14N2O4Pt	Free Base	Eloxatin	[Pt++].[O-]C(=O)C([O-])=O.N[C@@H]1CCCC[C@H]1N |r|	-3.423	0	2	1
S1225	Etoposide	588.56	33419-42-0	Topoisomerase	http://www.selleckchem.com/products/Etopophos.html	Etoposide is a semisynthetic derivative of podophyllotoxin, which inhibits DNA synthesis via topoisomerase II inhibition activity.	DNA Damage	C29H32O13	Free Base	Vepesid	[H][C@]12COC(=O)[C@]1([H])[C@H](C1=CC(OC)=C(O)C(OC)=C1)C1=C(C=C3OCOC3=C1)[C@H]2O[C@]1([H])O[C@]2([H])CO[C@@H](C)O[C@@]2([H])[C@H](O)[C@H]1O |r,c:19,30,t:10,14,22,24|	0.935	10	3	5
S1226	KU-0063794	465.54	938440-64-3	mTOR	http://www.selleckchem.com/products/KU-0063794.html	KU-0063794 is a potent and highly specific dual-mTOR inhibitor of mTORC1 and mTORC2 with IC50 of ~10 nM; no effect on PI3Ks.	PI3K/Akt/mTOR	C25H31N5O4	Free Base	N/A	COC1=C(CO)C=C(C=C1)C1=NC2=NC(=NC(N3CCOCC3)=C2C=C1)N1C[C@H](C)O[C@H](C)C1 |r,c:2,6,8,15,24,27,t:11,13|	3.274	6	1	5
S1227	Raloxifene HCl	510.04	82640-04-8	Estrogen/progestogen Receptor	http://www.selleckchem.com/products/Evista.html	Raloxifene is estrogen antagonists, inhibits human cytosolic aldehyde oxidase-catalyzed phthalazine oxidation activity with IC50 of 5.7 nM.	Endocrinology & Hormones	C28H28ClNO4S	Hydrochloride	Raloxifene Hydrochloride, keoxifene	Cl.OC1=CC=C(C=C1)C1=C(C(=O)C2=CC=C(OCCN3CCCCC3)C=C2)C2=C(S1)C=C(O)C=C2 |c:3,5,8,26,29,36,t:1,12,14,33|	6.843	2	2	7
S1229	Fludarabine Phosphate	365.21	75607-67-9	DNA/RNA Synthesis	http://www.selleckchem.com/products/Fludara.html	Fludarabine Phosphate is an analogue of adenosine and deoxyadenosine, which is able to compete with dATP for incorporation into DNA and inhibit DNA synthesis.	DNA Damage	C10H13FN5O7P	Phosphate	N/A	NC1=NC(F)=NC2=C1N=CN2[C@@H]1O[C@H](COP(O)(O)=O)[C@@H](O)[C@@H]1O |r,c:4,6,9,t:1|	-1.384	5	3	4
S1230	Flavopiridol (Alvocidib)	401.84	146426-40-6	CDK	http://selleckchem.com/products/Flavopiridol.html	Flavopiridol (Alvocidib) competes with ATP to inhibit CDKs including <b>CDK1</b>, <b>CDK2</b>, <b>CDK4</b> and <b>CDK6</b> with <b>IC50</b> of ~ 40 nM. It is 7.5-fold more selective for CDK1, 2, 4, 6 versus CDK7. Flavopiridol is initially found to inhibit EGFR and PKA. Phase 1/2.	Cell Cycle	C21H20ClNO5	Free Base	Alvocidib	[H][C@@]1(CCN(C)C[C@H]1O)C1=C2OC(=CC(=O)C2=C(O)C=C1O)C1=C(Cl)C=CC=C1 |r,c:10,13,21,25,28,30,t:18|	3.108	2	3	2
S1231	Topotecan HCl	457.91	119413-54-6	Topoisomerase	http://www.selleckchem.com/products/Topotecan-Hydrochloride.html	Topotecan (NSC 609699) is a topoisomerase I inhibitor for MCF-7 Luc cells and DU-145 Luc cells with IC50 of 13 nM and 2 nM, respectively.	DNA Damage	C23H24ClN3O5	Hydrochloride	Hycamtin, NSC 609699	Cl.CC[C@@]1(O)C(=O)OCC2=C1C=C1N(CC3=C1N=C1C=CC(O)=C(CN(C)C)C1=C3)C2=O |r,c:8,11,15,20,30,t:18,23|	1.959	4	1	3
S1233	2-Methoxyestradiol (2-MeOE2)	302.41	362-07-2	HIF	http://www.selleckchem.com/products/2-Methoxyestradiol(2ME2).html	2-Methoxyestradiol depolymerizes microtubules and blocks HIF-1α nuclear accumulation and HIF-transcriptional activity. Phase 2.	Angiogenesis	C19H26O3	Free Base	2-ME2	[H][C@@]12CC[C@H](O)[C@@]1(C)CC[C@]1([H])C3=CC(OC)=C(O)C=C3CC[C@@]21[H] |r,c:20,t:13,17|	3.821	1	2	1
S1234	AG-1024	305.17	65678-07-1	IGF-1R	http://www.selleckchem.com/products/ag-1024-tyrphostin.html	AG-1024 (Tyrphostin) inhibits IGF-1R autophosphorylation with IC50 of 7 μM, is less potent to IR with IC50 of 57 μM and specifically distinguishes between InsR and IGF-1R (as compared to other tyrphostins).	Protein Tyrosine Kinase	C14H13BrN2O	Free Base	N/A	CC(C)(C)C1=C(O)C(Br)=CC(C=C(C#N)C#N)=C1 |c:4,8,16|	3.922	0	1	2
S1235	Letrozole	285.3	112809-51-5	Aromatase	http://www.selleckchem.com/products/Letrozole.html	Letrozole is a third generation inhibitor of aromatase with IC50 of 0.07-20 nM.	Endocrinology & Hormones	C17H11N5	Free Base	Femara, Piroxicam	N#CC1=CC=C(C=C1)C(N1C=NC=N1)C1=CC=C(C=C1)C#N |c:4,6,11,13,18,20,t:2,16|	2.749	2	0	3
S1237	Temozolomide	194.15	85622-93-1	DNA/RNA Synthesis	http://www.selleckchem.com/products/Methazolastone.html	Temozolomide is a DNA damage inducer.	Ubiquitin	C6H6N6O2	Free Base	Methazolastone, Temodar, Temodal	CN1N=NC2=C(N=CN2C1=O)C(N)=O |c:2,6,t:4|	0.052	5	1	1
S1238	Tamoxifen	371.51	10540-29-1	Autophagy,Estrogen/progestogen Receptor	http://selleckchem.com/products/Nolvadex.html	Tamoxifen is an antagonist of the estrogen receptor in breast tissue.	Angiogenesis	C32H37NO8	Free Base	10540-29-1	OC(=O)CC(O)(CC(O)=O)C(O)=O.CC\C(C1=CC=CC=C1)=C(/C1=CC=CC=C1)C1=CC=C(OCCN(C)C)C=C1 |c:17,19,25,27,40,t:15,23,30,32|	1.966	4	0	13
S1241	Vincristine sulfate	923.04	2068-78-2	Autophagy,Microtubule Associated	http://www.selleckchem.com/products/Vincristine-Sulfate.html	Vincristine is an inhibitor of polymerization of microtubules by binding to tubulin with IC50 of 32 μM.	Cytoskeletal Signaling	C46H58N4O14S	Free Base	Leurocristine	OS(O)(=O)=O.[H][C@@]12N3CCC11C4=C(C=C(OC)C(=C4)[C@]4(C[C@@]5([H])CN(C[C@](O)(CC)C5)CCC5=C4NC4=C5C=CC=C4)C(=O)OC)N(C=O)[C@@]1([H])[C@](O)([C@H](OC(C)=O)[C@]2(CC)C=CC3)C(=O)OC |r,c:17,35,39,42,44,68,t:11,13|	3.365	8	1	10
S1243	Agomelatine	243.3	138112-76-2	5-HT Receptor	http://www.selleckchem.com/products/Agomelatine.html	Agomelatine is classified as a norepinephrine-dopamine disinhibitor (NDDI) due to its antagonism of the 5-HT2C receptor.	Neuronal Signaling	C15H17NO2	Free Base	Valdoxan, Melitor, Thymanax	COC1=CC2=C(CCNC(C)=O)C=CC=C2C=C1 |c:4,12,14,17,t:2|	2.17	2	1	4
S1244	Amuvatinib (MP-470)	447.51	850879-09-3	c-Kit,FLT3,PDGFR	http://www.selleckchem.com/products/MP-470.html	Amuvatinib (MP-470) is a potent and multi-targeted inhibitor of c-Kit, PDGFRα and Flt3 with IC50 of 10 nM, 40 nM and 81 nM, respectively. Phase 2.	Protein Tyrosine Kinase	C23H21N5O3S	Free Base	N/A	S=C(NCC1=CC=C2OCOC2=C1)N1CCN(CC1)C1=NC=NC2=C1OC1=CC=CC=C21 |c:12,24,26,32,t:4,6,22,30,34|	4.867	5	1	5
S1247	Leflunomide	270.21	75706-12-6	Dehydrogenase	http://www.selleckchem.com/products/Leflunomide.html	Leflunomide is an immunosuppressant agent. Its active metabolite is Teriflunomide.	Others	C12H9F3N2O2	Free Base	Arava	CC1=C(C=NO1)C(=O)NC1=CC=C(C=C1)C(F)(F)F |c:3,12,14,t:1,10|	2.156	3	1	3
S1249	JNJ-7706621	394.36	443797-96-4	Aurora Kinase,CDK	http://www.selleckchem.com/products/JNJ-7706621.html	JNJ-7706621 is pan-CDK inhibitor with the highest potency on CDK1/2 with IC50 of 9 nM/4 nM and showing >6-fold selectivity for CDK1/2 than CDK3/4/6. It also potently inhibits Aurora A/B and has no activity on Plk1 and Wee1.	Cell Cycle	C15H12F2N6O3S	Free Base	N/A	NC1=NC(NC2=CC=C(C=C2)S(N)(=O)=O)=NN1C(=O)C1=C(F)C=CC=C1F |c:7,9,15,21,24,26,t:1,5|	2.226	5	3	4
S1250	Enzalutamide (MDV3100)	464.44	915087-33-1	Androgen Receptor	http://www.selleckchem.com/products/MDV3100.html	Enzalutamide (MDV3100) is an androgen-receptor (AR) antagonist with IC50 of 36 nM.	Endocrinology & Hormones	C21H16F4N4O2S	Free Base	N/A	CNC(=O)C1=C(F)C=C(C=C1)N1C(=S)N(C(=O)C1(C)C)C1=CC=C(C#N)C(=C1)C(F)(F)F |c:4,7,9,28,t:22,24|	4.954	2	1	4
S1251	Dienogest	311.42	65928-58-7	Estrogen/progestogen Receptor	http://www.selleckchem.com/products/Dienogest.html	Dienogest is an orally active synthetic progesterone (or progestin).	Endocrinology & Hormones	C20H25NO2	Free Base	Natazia	[H][C@@]12CC[C@@](O)(CC#N)[C@@]1(C)CCC1=C3CCC(=O)C=C3CC[C@@]21[H] |r,c:14,20|	3.046	1	0	1
S1252	Entecavir Hydrate	295.29	209216-23-9	Reverse Transcriptase	http://www.selleckchem.com/products/Entecavir.html	Entecavir hydrate belongs to the family of medicines called antivirals.	Others	C12H17N5O4	Hydrate	Baraclude	O.NC1=NC(=O)C2=C(N1)N(C=N2)C1C[C@H](O)[C@@H](CO)C1=C |r,c:5,10,t:1,@@:9|	-1.611	3	4	2
S1255	Nepafenac	254.28	78281-72-8	COX	http://www.selleckchem.com/products/Nepafenac.html	Nepafenac is a non-steroidal anti-inflammatory agent.	Others	C15H14N2O2	Free Base	Nevanac	NC(=O)CC1=CC=CC(C(=O)C2=CC=CC=C2)=C1N |c:6,13,15,17,t:4,11|	1.524	2	2	4
S1256	Rufinamide	238.19	106308-44-5	Sodium Channel	http://www.selleckchem.com/products/Rufinamide.html	Rufinamide, a triazole derivative, is an anticonvulsant medication.	Transmembrane Transporters	C10H8F2N4O	Free Base	Banzel	NC(=O)C1=CN(CC2=C(F)C=CC=C2F)N=N1 |c:7,10,12,16,t:3|	1.437	3	1	3
S1257	Posaconazole	700.78	171228-49-2	P450 (e.g. CYP17)	http://www.selleckchem.com/products/Posaconazole.html	Posaconazole is a sterol C14ɑ demethylase inhibitor with an IC50 of 0.25 nM.	Others	C37H42F2N8O4	Free Base	Noxafil	CC[C@@H]([C@H](C)O)N1N=CN(C1=O)C1=CC=C(C=C1)N1CCN(CC1)C1=CC=C(OC[C@@H]2CO[C@](CN3C=NC=N3)(C2)C2=CC=C(F)C=C2F)C=C1 |r,c:7,15,17,39,41,51,55,t:13,27,29,46,48|	5.096	6	1	12
S1258	Prasugrel	373.44	150322-43-3	P2 Receptor	http://www.selleckchem.com/products/Prasugrel.html	A novel platelet inhibitor	Neuronal Signaling	C20H20FNO3S	Free Base	Effient, Efient, Prasita	CC(=O)OC1=CC2=C(CCN(C2)C(C(=O)C2CC2)C2=CC=CC=C2F)S1 |c:22,24,t:4,6,20|	3.801	3	0	6
S1259	Ramelteon	259.34	196597-26-9	MT Receptor	http://www.selleckchem.com/products/Ramelteon.html	Ramelteon is a novel melatonin receptor agonist for human MT1 and MT2 receptors and chick forebrain melatonin receptors with Ki of 14 pM, 112 pM and 23.1 pM, respectively.	GPCR & G Protein	C16H21NO2	Free Base	Rozerem, TAK-375	CCC(=O)NCC[C@@H]1CCC2=CC=C3OCCC3=C12 |r,t:10,12,18|	2.826	2	1	4
S1260	Cinacalcet HCl	393.87	364782-34-3	CaSR	http://www.selleckchem.com/products/Cinacalcet-hydrochloride.html	AMG-073 represents a new class of compounds for the treatment of hyperparathyroidism.	GPCR & G Protein	C22H23ClF3N	Hydrochloride	Mimpara, Sensipar	Cl.[H][C@](C)(NCCCC1=CC(=CC=C1)C(F)(F)F)C1=CC=CC2=C1C=CC=C2 |r,c:9,11,20,22,25,27,t:7,18|	6.338	0	1	7
S1261	Celecoxib	381.37	169590-42-5	COX	http://www.selleckchem.com/products/Celecoxib.html	Celecoxib is a selective COX-2 inhibitor with IC50 of 40 nM.	Neuronal Signaling	C17H14F3N3O2S	Free Base	Celebrex, Celebra	CC1=CC=C(C=C1)C1=CC(=NN1C1=CC=C(C=C1)S(N)(=O)=O)C(F)(F)F |c:3,5,10,16,18,t:1,8,14|	4.428	3	1	4
S1262	Avagacestat (BMS-708163)	520.88	1146699-66-2	Beta Amyloid,Gamma-secretase	http://www.selleckchem.com/products/BMS-708163.html	Avagacestat (BMS-708163) is a potent, selective, orally bioavailable γ-secretase inhibitor of Aβ40 and Aβ42 with IC50 of 0.3 nM and 0.27 nM, demonstrating a 193-fold selectivity against Notch. Phase 2.	Proteases	C20H17ClF4N4O4S	Free Base	N/A	NC(=O)[C@@H](CCC(F)(F)F)N(CC1=C(F)C=C(C=C1)C1=NOC=N1)S(=O)(=O)C1=CC=C(Cl)C=C1 |r,c:12,15,17,23,34,t:20,29,31|	3.364	6	1	10
S1263	CHIR-99021 (CT99021)	465.34	252917-06-9	GSK-3	http://selleckchem.com/products/CHIR-99021.html	CHIR-99021 (CT99021) is a <b>GSK-3α</b> and <b>GSK-3β</b> inhibitor with <b>IC50</b> of 10 nM and 6.7 nM, respectively.	PI3K/Akt/mTOR	C22H18Cl2N8	Free Base	CT99021	CC1=CNC(=N1)C1=CN=C(NCCNC2=NC=C(C=C2)C#N)N=C1C1=CC=C(Cl)C=C1Cl |c:4,17,19,24,32,t:1,7,9,15,27,29|	4.476	4	3	7
S1264	PD173074	523.67	219580-11-7	FGFR,VEGFR	http://www.selleckchem.com/products/PD-173074.html	PD173074 is a potent FGFR1 inhibitor with IC50 of ~25 nM and also inhibits VEGFR2 with IC50 of 100-200 nM, ~1000-fold selective for FGFR1 than PDGFR and c-Src.	Angiogenesis	C28H41N7O3	Free Base	N/A	CCN(CC)CCCCNC1=NC=C2C=C(C(NC(=O)NC(C)(C)C)=NC2=N1)C1=CC(OC)=CC(OC)=C1 |c:14,24,27,34,38,t:10,12,30|	4.313	6	3	13
S1266	WYE-354	495.53	1062169-56-5	mTOR	http://www.selleckchem.com/products/WYE-354.html	WYE-354 is a potent, specific and ATP-competitive inhibitor of mTOR with IC50 of 5 nM, blocks mTORC1/P-S6K(T389) and mTORC2/P-AKT(S473) not P-AKT(T308), selective for mTOR than PI3Kα (>100-fold) and PI3Kγ (>500-fold).	PI3K/Akt/mTOR	C24H29N7O5	Free Base	N/A	COC(=O)NC1=CC=C(C=C1)C1=NC2=C(C=NN2C2CCN(CC2)C(=O)OC)C(=N1)N1CCOCC1 |c:7,9,16,31,t:5,12,14|	1.886	8	1	6
S1267	Vemurafenib (PLX4032, RG7204)	489.92	918504-65-1	Raf	http://www.selleckchem.com/products/PLX-4032.html	Vemurafenib (PLX4032, RG7204) is a novel and potent inhibitor of B-RafV600E with IC50 of 31 nM.	MAPK	C23H18ClF2N3O3S	Free Base	RG7204	CCCS(=O)(=O)NC1=CC=C(F)C(C(=O)C2=CNC3=NC=C(C=C23)C2=CC=C(Cl)C=C2)=C1F |c:20,31,33,t:7,9,15,18,22,26,28|	4.953	4	2	7
S1271	Acarbose	645.6	56180-94-0	Others	http://www.selleckchem.com/products/Acarbose.html	Acarbose is an anti-diabetic drug used to treat type 2 diabetes mellitus and, in some countries, prediabetes.	Others	C25H43NO18	Free Base	Prandase, Precose, Glucobay, Bay-g 5421	C[C@H]1O[C@H](O[C@@H]2[C@@H](CO)O[C@H](O[C@@H]3[C@@H](CO)O[C@@H](O)[C@H](O)[C@H]3O)[C@H](O)[C@H]2O)[C@H](O)[C@@H](O)[C@@H]1N[C@H]1C=C(CO)[C@@H](O)[C@H](O)[C@H]1O |r,t:37|	-6.839	5	13	9
S1274	BX-795	591.47	702675-74-9	IκB/IKK,PDK	http://www.selleckchem.com/products/bx-795.html	BX795 is a potent and specific PDK1 inhibitor with IC50 of 6 nM, 140- and 1600-fold more selective for PDK1 than PKA and PKC, respectively. Meanwhile, in comparison to GSK3β more than 100-fold selectivity observed for PDK1.	PI3K/Akt/mTOR	C23H26IN7O2S	Free Base	N/A	IC1=CN=C(NC2=CC(NC(=O)N3CCCC3)=CC=C2)N=C1NCCCNC(=O)C1=CC=CS1 |c:17,19,22,34,t:1,3,6,32|	3.704	4	4	9
S1275	BX-912	471.35	702674-56-4	PDK	http://www.selleckchem.com/products/bx-912.html	BX912 is a potent and specific PDK1 inhibitor with IC50 of 12 nM, 9- and 105- fold greater selectivity for PDK1 than PKA and PKC, respectively. In comparison to GSK3β, selectivity for PDK1 is 600-fold.	PI3K/Akt/mTOR	C20H23BrN8O	Free Base	N/A	BrC1=CN=C(NC2=CC(NC(=O)N3CCCC3)=CC=C2)N=C1NCCC1=CN=CN1 |c:17,19,22,30,t:1,3,6,28|	2.798	4	4	7
S1276	Adapalene	412.52	106685-40-9	Retinoid Receptor	http://www.selleckchem.com/products/Adapalene.html	Adapalene is a third-generation topical retinoid primarily used in the treatment of acne.	Others	C28H28O3	Free Base	Differin	COC1=C(C=C(C=C1)C1=CC2=C(C=C1)C=C(C=C2)C(O)=O)C12CC3CC(CC(C3)C1)C2 |c:4,6,11,13,16,18,t:2,9|	6.279	2	0	4
S1278	Altretamine	210.28	645-05-6	DNA alkylator	http://www.selleckchem.com/products/Altretamine.html	Altretamine is an anti-neoplastic agent.	Others	C9H18N6	Free Base	Hexalen	CN(C)C1=NC(=NC(=N1)N(C)C)N(C)C |c:5,7,t:3|	1.995	3	0	3
S1280	Amisulpride	369.48	71675-85-9	Dopamine Receptor	http://www.selleckchem.com/products/Amisulpride.html	Amisulpride is an atypical antipsychotic used to treat psychosis in schizophrenia and episodes of mania in bipolar disorder.	Neuronal Signaling	C17H27N3O4S	Free Base	Solian	CCN1CCCC1CNC(=O)C1=CC(=C(N)C=C1OC)S(=O)(=O)CC |c:17,t:12,14|	1.127	4	2	7
S1281	Aniracetam	219.24	72432-10-1	AMPA Receptor-kainate Receptor-NMDA Receptor	http://www.selleckchem.com/products/Aniracetam.html	Aniracetam is a nootropics and neuroprotective drug.	Neuronal Signaling	C12H13NO3	Free Base	Draganon, Sarpul, Ampamet	COC1=CC=C(C=C1)C(=O)N1CCCC1=O |c:4,6,t:2|	1.267	3	0	2
S1282	Artemisinin	282.33	63968-64-9	Antifection	http://www.selleckchem.com/products/Artemisinin.html	Artemisinin is a drug used to treat multi-drug resistant strains of falciparum malaria.	Others	C15H22O5	Free Base	Qinghaosu	[H][C@@]12CC[C@@H](C)[C@]3([H])CC[C@@]4(C)OO[C@@]13[C@]([H])(OC(=O)[C@@H]2C)O4 |r|	1.998	5	0	0
S1283	Asenapine maleate	401.84	65576-45-6, 135883-08-8 (Maleic acid)	5-HT Receptor,Adrenergic Receptor	http://www.selleckchem.com/products/Asenapine.html	Asenapine inhibits adrenergic receptor (α1, α2A, α2B, α2C) with Ki of 0.25-1.2 nM and also inhibits 5-HT receptor (1A, 1B, 2A, 2B, 2C, 5A, 6, 7) with Ki of 0.03-4.0 nM.	Neuronal Signaling	C21H20ClNO5	Maleate	Saphris	OC(=O)\C=C/C(O)=O.[H][C@]12CN(C)C[C@]1([H])C1=C(OC3=C2C=CC=C3)C=CC(Cl)=C1 |r,c:16,19,22,24,27,30|	0.883	3	0	2
S1284	Benazepril HCl	460.95	86541-74-4	RAAS	http://www.selleckchem.com/products/Benazepril-hydrochloride.html	Benazepril is a medication used to treat high blood pressure.	Endocrinology & Hormones	C24H29ClN2O5	Hydrochloride	Lotensin	Cl.CCOC(=O)[C@H](CCC1=CC=CC=C1)N[C@H]1CCC2=C(C=CC=C2)N(CC(O)=O)C1=O |r,c:10,12,21,23,t:8,19|	1.003	4	1	10
S1286	Budesonide	430.53	51333-22-3	Glucocorticoid Receptor	http://www.selleckchem.com/products/Budesonide.html	Budesonide is a glucocorticoid steroid for the treatment of asthma, non-infectious rhinitis.	Others	C25H34O6	Free Base	Rhinocort, Pulmicort , Entocort, Symbicort, Noex. Entocort EC	[H][C@@]1(CCC)O[C@@H]2C[C@@]3([H])[C@]4([H])CCC5=CC(=O)C=C[C@]5(C)[C@@]4([H])[C@@H](O)C[C@]3(C)[C@@]2(O1)C(=O)CO |r,c:18,t:14|	2.198	4	2	4
S1287	Bumetanide	364.42	28395-03-1	Others	http://www.selleckchem.com/products/Bumetanide.html	Bumetanide (Bumex) is a loop diuretic of the sulfamyl category to treat heart failure.	Others	C17H20N2O5S	Free Base	Bumex	CCCCNC1=C(OC2=CC=CC=C2)C(=CC(=C1)C(O)=O)S(N)(=O)=O |c:5,10,12,15,17,t:8|	2.862	4	2	8
S1289	Carmofur	257.26	61422-45-5	DNA/RNA Synthesis	http://www.selleckchem.com/products/Carmofur.html	Carmofur is a pyrimidine analogue used as an antineoplastic agent.	DNA Damage	C11H16FN3O3	Free Base	HCFU	CCCCCCNC(=O)N1C=C(F)C(=O)NC1=O |t:10|	1.125	3	2	5
S1290	Celastrol	450.61	34157-83-0	Proteasome	http://www.selleckchem.com/products/Celastrol.html	Celastrol is a potent <b>proteasome</b> inhibitor for the chymotrypsin-like activity of a purified 20S proteasome with <b>IC50</b> of 2.5 μM.	Proteases	C29H38O4	Free Base	N/A	[H][C@@]12C[C@@](C)(CC[C@]1(C)CC[C@]1(C)C3=CC=C4C(C)=C(O)C(=O)C=C4[C@]3(C)CC[C@@]21C)C(O)=O |r,c:24,t:14,16,19|	5.475	2	1	1
S1291	Cetirizine DiHCl	461.81	83881-52-1	Histamine Receptor	http://www.selleckchem.com/products/Cetirizine-di-hcl.html	Cetirizine DiHCl is an antihistamine.	Neuronal Signaling	C21H27Cl3N2O3	Dihydrochloride	Zyrtec, Reactine	Cl.Cl.OC(=O)COCCN1CCN(CC1)C(C1=CC=CC=C1)C1=CC=C(Cl)C=C1 |c:17,19,27,t:15,22,24|	1.217	2	0	8
S1293	Cilnidipine	492.52	132203-70-4	Calcium Channel	http://www.selleckchem.com/products/Cilnidipine.html	Cilnidipine is a calcium channel blocker.	Transmembrane Transporters	C27H28N2O7	Free Base	FRC 8653	COCCOC(=O)C1=C(C)NC(C)=C(C1C1=CC(=CC=C1)[N+]([O-])=O)C(=O)OC\C=C\C1=CC=CC=C1 |c:7,12,18,20,34,36,t:16,32|	3.686	5	1	12
S1294	Cilostazol	369.46	73963-72-1	PDE	http://www.selleckchem.com/products/Cilostazol.html	Cilostazol is a potent cyclic nucleotide phosphodiesterase type 3 (PDE3) inhibitor with IC50 of 0.2 μM and inhibitor of adenosine uptake.	Metabolism	C20H27N5O2	Free Base	Pletal	O=C1CCC2=C(N1)C=CC(OCCCCC1=NN=NN1C1CCCCC1)=C2 |c:4,8,18,28,t:16|	3.23	5	1	7
S1297	Epothilone A	493.66	152044-53-6	Microtubule Associated	http://www.selleckchem.com/products/Epothilone-A.html	Epothilone A is a Taxol-like microtubule-stabilizing agent with EC0.01 of 2 μM.	Cytoskeletal Signaling	C26H39NO6S	Free Base	N/A	C[C@H]1CCC[C@H]2O[C@H]2C[C@H](OC(=O)C[C@H](O)C(C)(C)C(=O)[C@H](C)[C@H]1O)C(\C)=C\C1=CSC(C)=N1 |r,c:34,t:30|	3.574	5	2	2
S1299	Floxuridine	246.19	50-91-9	DNA/RNA Synthesis	http://www.selleckchem.com/products/Floxuridine.html	Floxuridine is a prodrugs of floxuridine and an oncology agent with an GI50 of 5.1 μM for the inhibition of MDCK/PEPT1.	DNA Damage	C9H11FN2O5	Free Base	Fludara, Fluorodeoxyuridine, FUDR, FdUrd, Floxuridin, FAMP	OC[C@H]1O[C@H](C[C@@H]1O)N1C=C(F)C(=O)NC1=O |r,t:10|	-1.775	3	3	2
S1300	Tegafur (FT-207, NSC 148958)	200.17	17902-23-7	DNA/RNA Synthesis	http://www.selleckchem.com/products/Ftorafur.html	FT-207 (NSC 148958) is a substance being used in the treatment of some types of cancer.	DNA Damage	C8H9FN2O3	Free Base	N/A	FC1=CN([C@H]2CCCO2)C(=O)NC1=O |r,t:1|	-0.625	3	1	1
S1302	Ifosfamide	261.09	3778-73-2	DNA/RNA Synthesis	http://www.selleckchem.com/products/Ifosfamide.html	Ifosfamide is a nitrogen mustard alkylating agent used in the treatment of cancer.	DNA Damage	C7H15Cl2N2O2P	Free Base	Mitoxana, Ifex	ClCCNP1(=O)OCCCN1CCCl	0.144	2	1	5
S1304	Megestrol Acetate	384.51	595-33-5	Androgen Receptor,Estrogen/progestogen Receptor	http://www.selleckchem.com/products/Megestrol-Acetate.html	Megestrol Acetate is a synthetic progesteronal agent with an IC50 of 260 μM for the inhibition of HegG2.	Endocrinology & Hormones	C24H32O4	Free Base	Megace, Megace ES	[H][C@@]12CC[C@](OC(C)=O)(C(C)=O)[C@@]1(C)CC[C@@]1([H])[C@@]2([H])C=C(C)C2=CC(=O)CC[C@]12C |r,t:22,25|	3.505	4	0	3
S1305	Mercaptopurine (6-MP)	152.18	50-44-2	DNA/RNA Synthesis	http://www.selleckchem.com/products/Mercaptopurine.html	Mercaptopurine is a widely used antileukemic agent and immunosuppressive drug that inhibits de novo purine synthesis through incorporation of thiopurine methyltransferase metabolites into DNA and RNA.	DNA Damage	C5H4N4S	Free Base	Purinethol, 6-mercaptopurine, 6-MP	S=C1N=CNC2=C1NC=N2 |c:2,5,9|	0.367	2	2	0
S1312	Streptozotocin (STZ)	265.22	18883-66-4	DNA alkylator	http://www.selleckchem.com/products/Streptozotocin.html	Streptozotocin is a glucosamine-nitrosourea derivative, which is a methylating, carcinogenic, antibiotic and diabetes inducing agent.	Others	C8H15N3O7	Free Base	Streptozocin, Zanosar, STZ	CN(N=O)C(=O)N[C@H]1[C@@H](O)O[C@H](CO)[C@@H](O)[C@@H]1O |r|	-2.285	3	4	3
S1315	Ki16425	474.96	355025-24-0	LPA Receptor	http://www.selleckchem.com/products/Ki16425.html	Ki16425 is a competitive, potent and reversible antagonist to LPA1, LPA2 and LPA3 with Ki of 0.34 μM, 6.5 μM and 0.93 μM, respectively, shows no activity at LPA4, LPA5, LPA6.	GPCR & G Protein	C23H23ClN2O5S	Free Base	N/A	CC(OC(=O)NC1=C(ON=C1C)C1=CC=C(CSCCC(O)=O)C=C1)C1=C(Cl)C=CC=C1 |c:9,24,27,30,32,t:6,13,15|	5.043	5	1	10
S1319	Costunolide	232.32	553-21-9	Telomerase	http://www.selleckchem.com/products/Costunolide.html	Costunolide, a natural sesquiterpene compound with multiple biological activities; inhibits FPTase with IC50 of 20 μM, also inhibits telomerase with IC50 of 65-90 μM.	DNA Damage	C15H20O2	Free Base	N/A	CC1=CCC\C(C)=C\[C@H]2OC(=O)C(=C)[C@@H]2CC1 |r,t:6|	4.022	2	0	0
S1322	Dexamethasone (DHAP)	392.46	50-02-2	Autophagy,IL Receptor	http://www.selleckchem.com/products/Dexamethasone.html	Dexamethasone is an anti-inflammatory and immunosuppressant.	Others	C22H29FO5	Free Base	Decadron	[H][C@@]12C[C@@H](C)[C@](O)(C(=O)CO)[C@@]1(C)C[C@H](O)[C@@]1(F)[C@@]2([H])CCC2=CC(=O)C=C[C@]12C |r,c:28,t:24|	1.708	2	2	2
S1324	Doxazosin Mesylate	547.58	77883-43-3	Adrenergic Receptor	http://www.selleckchem.com/products/Doxazosin-mesylate.html	Doxazosin mesylate is an alpha-1 adrenergic receptor blocker.	Neuronal Signaling	C24H29N5O8S	Mesylate	Cardura, Carduran	CS(O)(=O)=O.COC1=C(OC)C=C2C(N)=NC(=NC2=C1)N1CCN(CC1)C(=O)C1COC2=C(O1)C=CC=C2 |c:6,13,15,18,33,37,39,t:10|	2.071	7	1	4
S1326	Edaravone	174.2	89-25-8	Others	http://www.selleckchem.com/products/Edaravone.html	Edaravone, a strong novel free radical scavenger, is used for treatment of patients with acute brain infarction.	Others	C10H10N2O	Free Base	Radicut	CC1=NN(C(=O)C1)C1=CC=CC=C1 |c:10,12,t:1,8|	1.123	2	0	1
S1327	Ellagic acid	302.19	476-66-4	Topoisomerase	http://selleckchem.com/products/Ellagic-acid.html	Ellagic acid has antiproliferative and antioxidant property.	DNA Damage	C14H6O8	Free Base	N/A	OC1=CC2=C3C(OC(=O)C4=CC(O)=C(O)C(OC2=O)=C34)=C1O |c:3,22,t:1,9,12,19|
S1328	Etodolac	287.35	41340-25-4	COX	http://www.selleckchem.com/products/Etodolac.html	Etodolac (Lodine) is a COX inhibitor with an IC50 of 53.5 nM.	Neuronal Signaling	C17H21NO3	Free Base	Lodine, Lodine XL	CCC1=CC=CC2=C1NC1=C2CCO[C@]1(CC)CC(O)=O |r,c:4,6,10,t:2|	3.723	2	1	4
S1329	Etomidate	244.29	33125-97-2	GABA Receptor	http://www.selleckchem.com/products/Etomidate.html	Etomidate is a GABAA receptors agonist at GABAA receptors.	Neuronal Signaling	C14H16N2O2	Free Base	Amidate	CCOC(=O)C1=CN=CN1C(C)C1=CC=CC=C1 |c:7,15,17,t:5,13|	2.379	3	0	5
S1330	Felbamate	238.24	25451-15-4	NMDAR	http://www.selleckchem.com/products/Felbamate.html	Felbamate (Felbatol) is an anticonvulsant drug used in the treatment of epilepsy.	Others	C11H14N2O4	Free Base	Felbatol	NC(=O)OCC(COC(N)=O)C1=CC=CC=C1 |c:13,15,t:11|	0.984	4	2	7
S1331	Fluconazole	306.27	86386-73-4	P450 (e.g. CYP17)	http://www.selleckchem.com/products/Fluconazole.html	Fluconazole is a triazole antifungal drug used in the treatment and prevention of superficial and systemic fungal infections.	Others	C13H12F2N6O	Free Base	Diflucan, Trican, Alfumet	OC(CN1C=NC=N1)(CN1C=NC=N1)C1=C(F)C=C(F)C=C1 |c:4,6,11,13,16,22,t:19|	0.75	4	0	5
S1332	Flumazenil	303.29	78755-81-4	GABA Receptor	http://www.selleckchem.com/products/Flumazenil.html	Flumazenil is a benzodiazepine antagonist.	Neuronal Signaling	C15H14FN3O3	Free Base	Flumazepil, Ro 15-1788, Anexate, Lanexat, Mazicon, Roma	CCOC(=O)C1=C2CN(C)C(=O)C3=CC(F)=CC=C3N2C=N1 |c:5,15,17,22,t:12|	1.583	4	0	3
S1333	Fluoxetine HCl	345.79	56296-78-7	5-HT Receptor	http://www.selleckchem.com/products/Fluoxetine-hydrochloride.html	Fluoxetine HCl is an antidepressant of the selective serotonin reuptake inhibitor (SSRI)class.	Neuronal Signaling	C17H19ClF3NO	Hydrochloride	Prozac, Sarafem	Cl.CNCCC(OC1=CC=C(C=C1)C(F)(F)F)C1=CC=CC=C1 |c:8,10,19,21,t:6,17|	4.415	1	1	7
S1334	Flupirtine maleate	420.39	75507-68-5	DNA/RNA Synthesis	http://www.selleckchem.com/products/Flupirtine-maleate.html	Flupirtine maleate is the salt form of Flupirtine, which is a centrally acting non-opioid analgesia, is a selective neuronal potassium channel opener that also has NMDA receptor antagonist properties. Phase 2.	DNA Damage	C19H21FN4O6	Maleate	Katadolon	OC(=O)\C=C\C(O)=O.CCOC(=O)NC1=C(N)N=C(NCC2=CC=C(F)C=C2)C=C1 |c:13,25,28,t:16,20,22|	2.76	5	3	8
S1336	Fluvoxamine maleate	434.41	61718-82-9	5-HT Receptor	http://www.selleckchem.com/products/Fluvoxamine-maleate.html	Fluvoxamine maleate is a selective serotonin (5-HT) reuptake inhibitor (SSRI).	Neuronal Signaling	C19H25F3N2O6	Maleate	Luvox	OC(=O)\C=C/C(O)=O.COCCCC\C(C1=CC=C(C=C1)C(F)(F)F)=N/OCCN |c:16,18,t:14|	0.111	5	1	12
S1340	Gatifloxacin	375.39	112811-59-3	Topoisomerase	http://www.selleckchem.com/products/Gatifloxacin.html	Gatifloxacin is an antibiotic of the fourth-generation fluoroquinolone family, and inhibits the bacterial enzymes <b>DNA gyrase</b> and </b>topoisomerase IV</b>.	DNA Damage	C19H22FN3O4	Free Base	Gatiflo,Tequin and Zymar	COC1=C2N(C=C(C(O)=O)C(=O)C2=CC(F)=C1N1CCNC(C)C1)C1CC1 |c:2,13,16,t:5|	-0.909	3	1	4
S1342	Genistein	270.24	446-72-0	EGFR,Topoisomerase	http://www.selleckchem.com/products/Genistein.html	Genistein, a phytoestrogen found in soy products, is a highly specific inhibitor of protein tyrosine kinase (PTK) which blocks the mitogenic effect mediated by EGF on NIH-3T3 cells with IC50 of 12μM or by insulin with IC50 of 19 μM.	Protein Tyrosine Kinase	C15H10O5	Free Base	N/A	OC1=CC=C(C=C1)C1=COC2=C(C(O)=CC(O)=C2)C1=O |c:3,5,14,17,t:1,8,11|	2.14	2	3	1
S1343	Ginkgolide B	424.4	15291-77-7	PAFR	http://www.selleckchem.com/products/Ginkgolide-B.html	Ginkgolide B is a PAFR antagonist with IC50 of 3.6 μM.	Others	C20H24O10	Free Base	BN 52021	[H][C@@]12OC(=O)[C@H](O)C11[C@@H](C[C@H]3OC(=O)[C@]4(O2)[C@@]2(O)[C@H](C)C(=O)O[C@@]2([H])[C@@H](O)C134)C(C)(C)C |r|	-0.854	7	2	1
S1344	Glimepiride	490.62	93479-97-1	Potassium Channel	http://www.selleckchem.com/products/Glimepiride.html	Glimepiride is a medium-to-long acting sulfonylurea anti-diabetic compound with an ED50 of 182 μg/kg.	Proteases	C24H34N4O5S	Free Base	Amaryl, Glista OD	CCC1=C(C)CN(C(=O)NCCC2=CC=C(C=C2)S(=O)(=O)NC(=O)N[C@H]2CC[C@H](C)CC2)C1=O |r,c:2,14,16,t:12|	3.781	5	3	7
S1351	Ivermectin	875.09	70288-86-7	Antifection	http://www.selleckchem.com/products/Ivermectin.html	Ivermectin is a broad-spectrum antiparasitic medication.	Others	C48H74O14	Free Base	Stromectol	[H][C@@]12OC\C3=C/C=C/[C@H](C)[C@H](O[C@@]4([H])C[C@H](OC)[C@@H](O[C@@]5([H])C[C@H](OC)[C@@H](O)[C@H](C)O5)[C@H](C)O4)\C(C)=C\C[C@]4([H])C[C@@H](C[C@]5(CC[C@H](C)[C@]([H])(O5)[C@@H](C)CC)O4)OC(=O)[C@]([H])(C=C(C)[C@H]1O)[C@@]23O |r,c:4,t:6,37,65|	4.743	11	2	8
S1352	TG100-115	346.34	677297-51-7	PI3K	http://www.selleckchem.com/products/TG100-115.html	TG100115 is a PI3Kγ/δ inhibitor with IC50 of 83 nM/235 nM, with little effect on PI3Kα/β. Phase 1/2.	PI3K/Akt/mTOR	C18H14N6O2	Free Base	N/A	NC1=NC2=NC(C3=CC=CC(O)=C3)=C(N=C2C(N)=N1)C1=CC(O)=CC=C1 |c:8,11,13,15,19,25,27,t:1,3,6,22|	2.687	4	4	2
S1353	Ketoconazole	531.43	65277-42-1	P450 (e.g. CYP17)	http://www.selleckchem.com/products/Ketoconazole.html	Ketoconazole inhibits cyclosporine oxidase and testosterone 6 beta-hydroxylase with IC50 of 0.19 mM and 0.22 mM, respectively.	Metabolism	C26H28Cl2N4O4	Free Base	Nizoral, Extina, Xolegel, Kuric	CC(=O)N1CCN(CC1)C1=CC=C(OC[C@H]2CO[C@@](CN3C=CN=C3)(O2)C2=CC=C(Cl)C=C2Cl)C=C1 |r,c:22,24,34,38,t:10,12,29,31|	3.61	5	0	7
S1354	Lansoprazole	369.36	103577-45-3	Proton Pump	http://www.selleckchem.com/products/Lansoprazole.html	Lansoprazole is a proton-pump inhibitor (PPI) which prevents the stomach from producing gastric acid.	Transmembrane Transporters	C16H14F3N3O2S	Free Base	Prevacid, Prevacid NapraPAC, Prevacid SoluTab	CC1=C(OCC(F)(F)F)C=CN=C1CS(=O)C1=NC2=CC=CC=C2N1 |c:1,9,11,21,23,t:17,19|	3.442	4	1	6
S1356	Levetiracetam	170.21	102767-28-2	Calcium Channel	http://www.selleckchem.com/products/Levetiracetam.html	Levetiracetam is an antiepileptic compound.	Others	C8H14N2O2	Free Base	Keppra, Keppra XR	CC[C@H](N1CCCC1=O)C(N)=O |r|	-0.304	2	1	3
S1357	Lidocaine	234.34	137-58-6	Histamine Receptor	http://www.selleckchem.com/products/Lidocaine.html	Lidocaine is a selective inverse peripheral histamine H1-receptor agonist with an IC50 of >32 μM.	Neuronal Signaling	C14H22N2O	Free Base	Alphacaine, Xylocaine, lignocaine	CCN(CC)CC(=O)NC1=C(C)C=CC=C1C |c:9,12,14|	2.626	1	1	5
S1358	Loratadine	382.88	79794-75-5	Histamine Receptor	http://www.selleckchem.com/products/Loratadine.html	Loratadine is a selective inverse peripheral histamine H1-receptor agonist with an IC50 of >32 μM.	Neuronal Signaling	C22H23ClN2O2	Free Base	Alavert, Claritin	CCOC(=O)N1CCC(CC1)=C1C2=C(CCC3=C1N=CC=C3)C=C(Cl)C=C2 |c:13,17,20,22,28,t:25|	5	3	0	2
S1359	Losartan Potassium (DuP 753)	462.01	124750-99-8	RAAS	http://www.selleckchem.com/products/losartan-potassium.html	Losartan is an angiotensin II receptor antagonist, competes with the binding of angiotensin II to AT1 receptors with IC50 of 20 nM.	Endocrinology & Hormones	C22H23ClKN6O	Potassium salt	Cozaar	[K].CCCCC1=NC(Cl)=C(CO)N1CC1=CC=C(C=C1)C1=C(C=CC=C1)C1=NN=NN1 |c:16,18,23,25,30,t:4,7,14,21,28|	4.241	4	2	8
S1361	MGCD-265	517.6	875337-44-3	c-Met,Tie-2,VEGFR	http://www.selleckchem.com/products/MGCD-265.html	MGCD-265 is a potent, multi-target and ATP-competitive inhibitor of c-Met and VEGFR1/2/3 with IC50 of 1 nM, 3 nM/3 nM/4 nM, respectively; also inhibits Ron and Tie2. Phase 1/2.	Protein Tyrosine Kinase	C26H20FN5O2S2	Free Base	N/A	CN1C=NC(=C1)C1=CC2=NC=CC(OC3=CC=C(NC(=S)NC(=O)CC4=CC=CC=C4)C=C3F)=C2S1 |c:2,4,11,28,30,33,36,t:7,9,15,17,26|	6.037	4	2	8
S1362	Rigosertib (ON-01910)	473.47	1225497-78-8	PLK	http://www.selleckchem.com/products/ON-01910.html	Rigosertib (ON-01910) is a non-ATP-competitive inhibitor of PLK1 with IC50 of 9 nM. It shows 30-fold greater selectivity against Plk2 and no activity to Plk3. Phase 3.	Cell Cycle	C21H24NNaO8S	Sodium Salt	ON-01910	[Na+].COC1=CC(OC)=C(\C=C\S(=O)(=O)CC2=CC=C(OC)C(NCC([O-])=O)=C2)C(OC)=C1 |c:25,30,t:2,6,14,16|	0.632	6	1	11
S1363	Ki8751	469.41	228559-41-9	c-Kit,PDGFR,VEGFR	http://www.selleckchem.com/products/Ki8751.html	Ki8751 is a potent and selective inhibitor of VEGFR2 with IC50 of 0.9 nM, >40-fold selective for VEGFR2 than c-Kit, PDGFRα and FGFR-2, little activity to EGFR, HGFR and InsR.	Protein Tyrosine Kinase	C24H18F3N3O4	Free Base	N/A	COC1=CC2=NC=CC(OC3=CC=C(NC(=O)NC4=CC=C(F)C=C4F)C(F)=C3)=C2C=C1OC |c:6,23,28,30,33,t:2,4,10,12,18,20|	4.853	5	2	6
S1364	Patupilone (EPO906, Epothilone B)	507.68	152044-54-7	Microtubule Associated	http://www.selleckchem.com/products/Epothilone-B.html	Epothilone B is a Taxol-like microtubule-stabilizing agent with EC0.01 of 1.8 μM. Phase 2.	Cytoskeletal Signaling	C27H41NO6S	Free Base	N/A	C[C@H]1CCC[C@@]2(C)O[C@H]2C[C@H](OC(=O)C[C@H](O)C(C)(C)C(=O)[C@H](C)[C@H]1O)C(\C)=C\C1=CSC(C)=N1 |r,c:35,t:31|	3.779	5	2	2
S1366	BMS-707035	410.42	729607-74-3	Integrase	http://www.selleckchem.com/products/BMS-707035.html	BMS-707035 is a specific HIV-I integrase (IN) inhibitor with IC50 of 15 nM. Phase 2.	Microbiology	C17H19FN4O5S	Free Base	N/A	CN1C(=O)C(O)=C(N=C1N1CCCCS1(=O)=O)C(=O)NCC1=CC=C(F)C=C1 |c:5,7,28,t:23,25|	0.385	5	2	4
S1367	Amonafide	283.33	69408-81-7	Topoisomerase	http://www.selleckchem.com/products/Amonafide.html	Amonafide produces protein-associated DNA-strand breaks through a topoisomerase II-mediated reaction, but does not produce topoisomerase I-mediated DNA cleavage. Phase 3.	DNA Damage	C16H17N3O2	Free Base	AS1413, Xanafide, Quinamed	CN(C)CCN1C(=O)C2=CC(N)=CC3=CC=CC(C1=O)=C23 |c:11,15,t:8,13,20|	1.162	2	1	3
S1368	Acitretin	326.43	55079-83-9	Retinoid Receptor	http://www.selleckchem.com/products/Acitretin.html	Acitretin is a second generation retinoid used for psoriasis.	Others	C21H26O3	Free Base	Soriatane	COC1=CC(C)=C(\C=C\C(C)=C\C=C\C(C)=C\C(O)=O)C(C)=C1C |c:21,t:2,5|	5.665	2	0	6
S1369	Bafetinib (INNO-406)	576.62	859212-16-1	Bcr-Abl	http://www.selleckchem.com/products/Bafetinib.html	Bafetinib (INNO-406) is a potent and selective dual <b>Bcr-Abl/Lyn</b> inhibitor with <b>IC50</b> of 5.8 nM/19 nM in cell-free assays, does not inhibit the phosphorylation of the T315I mutant and is less potent to PDGFR and c-Kit. Phase 2.	Angiogenesis	C30H31F3N8O	Free Base	NS-187	CN(C)[C@H]1CCN(CC2=CC=C(C=C2C(F)(F)F)C(=O)NC2=CC=C(C)C(NC3=NC=C(C=N3)C3=CN=CN=C3)=C2)C1 |r,c:10,12,31,33,38,40,42,t:8,22,24,29,36|	4.197	5	2	9
S1374	Doripenem Hydrate	438.52	364622-82-2	Antifection	http://www.selleckchem.com/products/Doripenem-Hydrate.html	Doripenem Hydrate is an ultra-broad spectrum injectable antibiotic.	Others	C15H26N4O7S2	Hydrate	S-4661	O.[H][C@]12[C@@H](C)C(S[C@@H]3CN[C@H](CNS(N)(=O)=O)C3)=C(N1C(=O)[C@]2([H])[C@@H](C)O)C(O)=O |r,c:17|	-5.546	4	4	7
S1376	Gestodene	310.43	60282-87-3	Estrogen/progestogen Receptor	http://www.selleckchem.com/products/Gestodene.html	Gestodene is a progestogen hormonal contraceptive.	Endocrinology & Hormones	C21H26O2	Free Base	N/A	[H][C@@]12C=C[C@@](O)(C#C)[C@@]1(CC)CC[C@]1([H])[C@@]3([H])CCC(=O)C=C3CC[C@@]21[H] |r,c:2,22|	4.462	1	0	1
S1377	Drospirenone	366.49	67392-87-4	Estrogen/progestogen Receptor	http://www.selleckchem.com/products/Drospirenone.html	Drospirenone is a synthetic progestin that is an analog to spironolactone.	Endocrinology & Hormones	C24H30O3	Free Base	Angeliq	[H][C@@]12C[C@]1([H])[C@@]1([H])[C@]3([H])[C@]4([H])C[C@]4([H])[C@@]4(CCC(=O)O4)[C@@]3(C)CC[C@]1([H])[C@@]1(C)CCC(=O)C=C21 |r,t:37|	3.383	3	0	0
S1378	Ruxolitinib (INCB018424)	306.37	941678-49-5	JAK	http://www.selleckchem.com/products/INCB18424.html	INCB018424 is the first potent, selective, JAK1/2 inhibitor to enter the clinic with IC50 of 3.3 nM/2.8 nM, >130-fold selectivity for JAK1/2 versus JAK3. Phase 3.	JAK/STAT	C17H18N6	Free Base	N/A	N#CC[C@H](C1CCCC1)N1C=C(C=N1)C1=NC=NC2=C1C=CN2 |r,c:11,13,18,20,23,t:16|	2.88	3	1	4
S1379	Isotretinoin	300.44	4759-48-2	Hydroxylase	http://www.selleckchem.com/products/Isotretinoin.html	It was developed to be used as a chemotherapy medication for the treatment of brain cancer, pancreatic cancer and more.	Metabolism	C20H28O2	Free Base	Accutane, Amnesteem, Claravis, Sotret	CC(\C=C\C1=C(C)CCCC1(C)C)=C\C=C\C(C)=C/C(O)=O |c:4|	5.551	1	0	5
S1380	Lopinavir	628.8	192725-17-0	HIV Protease	http://www.selleckchem.com/products/Lopinavir.html	Lopinavir is a potent HIV protease inhibitor with Ki of 1.3 pM.	Proteases	C37H48N4O5	Free Base	ABT-378	CC(C)[C@H](N1CCCNC1=O)C(=O)N[C@H](C[C@H](O)[C@H](CC1=CC=CC=C1)NC(=O)COC1=C(C)C=CC=C1C)CC1=CC=CC=C1 |r,c:23,25,33,36,38,45,47,t:21,43|	4.926	4	4	15
S1381	Meropenem	383.46	96036-03-2	Antifection	http://www.selleckchem.com/products/Meropenem.html	Meropenem is an ultra-broad spectrum injectable antibiotic.	Others	C17H25N3O5S	Free Base	Merrem, Meronem	CC(O)C1C2C(C)C(SC3CNC(C3)C(=O)N(C)C)=C(N2C1=O)C(O)=O |c:19|	-4.129	3	2	5
S1382	Mianserin HCl	300.83	21535-47-7	Histamine Receptor(HT receptr?)	http://www.selleckchem.com/products/Mianserin-hydrochloride.html	Mianserin HCl is a psychoactive agent of the tetracyclic antidepressant.	Neuronal Signaling	C18H21ClN2	Hydrochloride	Bolvidon, Norval, Tolvon	Cl.CN1CCN2C(C1)C1=C(CC3=C2C=CC=C3)C=CC=C1 |c:8,11,14,16,19,21|	4.088	0	0	0
S1385	Mosapride Citrate	614.02	112885-42-4	5-HT Receptor	http://www.selleckchem.com/products/Mosapride-citrate.html	Mosapride Citrate is a gastroprokinetic agent that acts as a selective 5HT4 agonist.	Neuronal Signaling	C27H33ClFN3O10	Citrate	TAK-370, AS-4370, Gasmot	OC(=O)CC(O)(CC(O)=O)C(O)=O.CCOC1=CC(N)=C(Cl)C=C1C(=O)NCC1CN(CC2=CC=C(F)C=C2)CCO1 |c:21,37,t:15,18,32,34|	-1.422	6	2	12
S1386	Nafamostat Mesylate	539.58	82956-11-4	Serine Protease	http://www.selleckchem.com/products/Nafamostat-mesylate.html	Nafamostat Mesylate is an anticoagulant.Phase 4.	Proteases	C21H25N5O8S2	Dimesylate	Futhan, FUT-175	CS(O)(=O)=O.CS(O)(=O)=O.NC(=N)NC1=CC=C(C=C1)C(=O)OC1=CC2=C(C=C1)C=C(C=C2)C(N)=N |c:14,16,24,26,29,31,t:12,22|	1.364	2	3	6
S1387	Naftopidil DiHCl	465.41	57149-08-3	Adrenergic Receptor	http://www.selleckchem.com/products/Naftopidil-Dihydrochloride.html	Naftopidil DiHCl is a selective 5-HT1A and α1-adrenergic receptor antagonist with IC50 of 0.1 μM and 0.2 μM, respectively. Phase 3.	Neuronal Signaling	C24H30Cl2N2O3	Dihydrochloride	Flivas, KT-611, Avishot	Cl.Cl.COC1=CC=CC=C1N1CCN(CC(O)COC2=C3C=CC=CC3=CC=C2)CC1 |c:4,6,18,20,22,25,27,t:2|	4.726	2	1	7
S1389	Omeprazole	345.42	73590-58-6	Autophagy,Proton Pump	http://www.selleckchem.com/products/Omeprazole.html	Omeprazole(Prilosec) is a proton pump inhibitor used in the treatment of dyspepsia.	Transmembrane Transporters	C17H19N3O3S	Free Base	Losec, Omesec, Prilosec, Zegerid	COC1=CC=C2NC(=NC2=C1)S(=O)CC1=C(C)C(OC)=C(C)C=N1 |c:7,10,16,24,t:2,4,21|	2.904	5	1	5
S1390	Ondansetron HCl	329.82	99614-01-4	5-HT Receptor	http://www.selleckchem.com/products/Ondansetron-hydrochloride.html	Ondansetron HCl is a serotonin 5-HT3 receptor antagonist.	Neuronal Signaling	C18H20ClN3O	Hydrochloride	Ondemet, Emeset, Emetron	Cl.CN1C2=CC=CC=C2C2=C1CCC(CN1C=CN=C1C)C2=O |c:4,6,9,17,19,t:2|	3.016	2	0	2
S1391	Oxcarbazepine	252.27	28721-07-5	Sodium Channel	http://www.selleckchem.com/products/Oxcarbazepine.html	Oxcarbazepine inhibits the binding of [3H]BTX to sodium channels with IC50 of 160 μM and also inhibits the influx of 22Na+ into rat brain synaptosomes with IC50 about 100 μM.	Transmembrane Transporters	C15H12N2O2	Free Base	Trileptal	NC(=O)N1C2=C(CC(=O)C3=C1C=CC=C3)C=CC=C2 |c:4,9,12,14,17,19|	2.131	2	1	0
S1392	Pelitinib (EKB-569)	467.92	257933-82-7	EGFR	http://www.selleckchem.com/products/Pelitinib.html	Pelitinib (EKB-569) is a potent irreversible EGFR inhibitor with IC50 of 38.5 nM. Phase2.	Protein Tyrosine Kinase	C24H23ClFN5O2	Free Base	WAY-EKB 569	CCOC1=C(NC(=O)\C=C\CN(C)C)C=C2C(=C1)N=CC(C#N)=C2NC1=CC(Cl)=C(F)C=C1 |c:3,14,16,19,23,33,t:27,30|	4.455	3	2	8
S1393	Pirarubicin	627.64	72496-41-4	Topoisomerase	http://selleckchem.com/products/Pirarubicin.html	Pirarubicin is an anthracycline antibiotic, and also a DNA/RNA synthesis inhibitor by intercalating into DNA and interacts with topoisomerase II, used as an antineoplastic agent.	DNA Damage	C32H37NO12	Free Base	N/A	[H][C@]1(CCCCO1)O[C@H]1[C@@H](N)C[C@H](O[C@@]2([H])C[C@@](O)(CC3=C2C(O)=C2C(=O)C4=C(C=CC=C4OC)C(=O)C2=C3O)C(=O)CO)O[C@H]1C |r,c:21,31,33,41,t:25,29|	1.091	8	4	7
S1394	Pizotifen Malate	429.53	5189-11-7	5-HT Receptor	http://www.selleckchem.com/products/Pizotifen-malate.html	Pizotifen Malate is a benzocycloheptane based agent used for recurrent migraine headaches.	Others	C23H27NO5S	Malate	Sandomigran, pizotyline	OC(CC(O)=O)C(O)=O.CN1CCC(CC1)=C1C2=C(CCC3=C1C=CC=C3)SC=C2 |c:17,21,24,26,30|	0.292	2	1	3
S1396	Resveratrol	228.24	501-36-0	Autophagy,Sirtuin	http://www.selleckchem.com/products/Resveratrol.html	Resveratrol is a phytoalexin produced naturally by several plants with anti-cancer, anti-inflammatory, blood-sugar-lowering and other beneficial cardiovascular effects.	Epigenetics	C14H12O3	Free Base	N/A	OC1=CC=C(\C=C\C2=CC(O)=CC(O)=C2)C=C1 |c:10,13,16,t:1,3,7|	3.09	0	3	2
S1397	Rocuronium Bromide	609.68	119302-91-9	AChR	http://www.selleckchem.com/products/Rocuronium-bromide.html	Rocuronium Bromide is an aminosteroid non-depolarizing neuromuscular blocker or muscle relaxant.	Neuronal Signaling	C32H53BrN2O4	Bromide	Zemuron, Esmeron	[Br-].[H][C@@]12C[C@@H]([C@H](OC(C)=O)[C@@]1(C)CC[C@@]1([H])[C@@]2([H])CC[C@@]2([H])C[C@H](O)[C@H](C[C@]12C)N1CCOCC1)[N+]1(CC=C)CCCC1 |r|	0.282	3	1	6
S1398	Stavudine (d4T)	224.21	3056-17-5	Reverse Transcriptase	http://www.selleckchem.com/products/Stavudine.html	Stavudine is a nucleoside analog reverse transcriptase inhibitor (NARTI) active against HIV.	Microbiology	C10H12N2O4	Free Base	Zerit	CC1=CN(C2OC(CO)C=C2)C(=O)NC1=O |c:9,t:1|	-0.515	3	2	2
S1400	Tenofovir Disoproxil Fumarate	635.51	202138-50-9	Reverse Transcriptase	http://www.selleckchem.com/products/Tenofovir-Disoproxil-Fumarate.html	Tenofovir Disoproxil Fumarate belongs to a class of antiretroviral drugs, it inhibits the activity of <b>HIV reverse transcriptase</b> by competing with the natural substrate deoxyadenosine 5’-triphosphate and, after incorporation into DNA, by DNA chain termination.	Microbiology	C23H34N5O14P	Fumarate	Viread	OC(=O)\C=C\C(O)=O.CC(C)OC(=O)OCOP(=O)(CO[C@H](C)CN1C=NC2=C1N=CN=C2N)OCOC(=O)OC(C)C |r,c:24,26,29,31|	1.729	14	1	19
S1401	Tenofovir	287.21	147127-20-6	Reverse Transcriptase	http://www.selleckchem.com/products/Tenofovir.html	Tenofovir blocks <b>reverse transcriptase</b> and hepatitis B virus infections.	Microbiology	C9H14N5O4P	Free Base	Viread	C[C@H](CN1C=NC2=C(N)N=CN=C12)OCP(O)(O)=O |r,c:4,6,9,t:11|	-0.772	4	1	5
S1403	Tigecycline	585.65	220620-09-7	Antifection	http://www.selleckchem.com/products/Tigecycline.html	Tigecycline is bacteriostatic and is a protein synthesis inhibitor by binding to the 30S ribosomal subunit of bacteria and thereby blocking entry of Aminoacyl-tRNA into the A site of the ribosome during prokaryotic translation.	Others	C29H39N5O8	Free Base	Tygacil, GAR-936, WAY-GAR-936, TBG-MINO	[H][C@@]12CC3=C(C(=O)C1=C(O)[C@]1(O)C(=O)C(C(N)=O)=C(O)[C@@H](N(C)C)[C@]1([H])C2)C(O)=C(NC(=O)CNC(C)(C)C)C=C3N(C)C |r,c:3,42,t:8,18,31|	-0.381	4	6	7
S1404	Trilostane	329.43	13647-35-3	Dehydrogenase	http://www.selleckchem.com/products/Trilostane.html	Trilostane is an inhibitor of 3 β-hydroxysteroid dehydrogenase used in the treatment of Cushing’s syndrome.	Metabolism	C20H27NO3	Free Base	Vetoryl	[H][C@]12O[C@]11CC[C@@]3([H])[C@]4([H])CC[C@H](O)[C@@]4(C)CC[C@]3([H])[C@@]1(C)CC(C#N)=C2O |r,c:29|	2.434	1	2	0
S1405	Vecuronium Bromide	637.73	50700-72-6	AChR	http://www.selleckchem.com/products/Vecuronium-Bromide.html#	Vecuronium Bromide is a muscle relaxant in the category of non-depolarizing blocking agents.	Others	C34H57BrN2O4	Bromide	Norcuron, Org NC 45	[Br-].[H][C@@]12C[C@@H]([C@H](OC(C)=O)[C@@]1(C)CC[C@@]1([H])[C@@]2([H])CC[C@@]2([H])C[C@H](OC(C)=O)[C@H](C[C@]12C)N1CCCCC1)[N+]1(C)CCCCC1 |r|	1.73	4	0	6
S1407	Bimatoprost	415.57	155206-00-1	Immunology & Inflammation related	http://www.selleckchem.com/products/Bimatoprost.html	Bimatoprost is a prostaglandin analog used topically (as eye drops) to control the progression of glaucoma and in the management of ocular hypertension.	Others	C25H37NO4	Free Base	Lumigan	CCNC(=O)CCC\C=C/C[C@H]1[C@@H](O)C[C@H](O)[C@@H]1\C=C\C(O)CCC1=CC=CC=C1 |r,c:27,29,t:25|	3.03	1	4	12
S1408	Linezolid	337.35	165800-03-3	Antifection	http://www.selleckchem.com/products/Linezolid(Zyvox).html	Linezolid is a synthetic antibiotic used for the treatment of serious infections.	Others	C16H20FN3O4	Free Base	Zyvoxid, Zyvoxam	CC(=O)NC[C@H]1CN(C(=O)O1)C1=CC=C(N2CCOCC2)C(F)=C1 |r,c:24,t:12,14|	0.894	4	1	4
S1409	Alfuzosin HCl	425.91	81403-68-1	Adrenergic Receptor	http://www.selleckchem.com/products/Alfuzosin-hydrochloride.html	Alfuzosin(Uroxatral) is an alpha1 receptor antagonist used to treat benign prostatic hyperplasia (BPH).	Neuronal Signaling	C19H28ClN5O4	Hydrochloride	Uroxatral	Cl.COC1=C(OC)C=C2C(N)=NC(=NC2=C1)N(C)CCCNC(=O)C1CCCO1 |c:2,9,11,14,t:6|	1.8	6	2	8
S1415	Clopidogrel	419.9	120202-66-6	P2 Receptor	http://www.selleckchem.com/products/Clopidogrel-bisulfate.html	Clopidogrel (Plavix) is an oral, thienopyridine class antiplatelet agent.	Neuronal Signaling	C16H18ClNO6S2	Sulfate	Iscover	OS(O)(=O)=O.COC(=O)[C@@H](N1CCC2=C(C1)C=CS2)C1=C(Cl)C=CC=C1 |r,c:12,16,20,23,25|	3.128	2	0	4
S1422	Droxinostat	243.69	99873-43-5	HDAC	http://www.selleckchem.com/products/Droxinostat.html	Droxinostat (CMH, 5809354) is a selective inhibitor of HDAC, mostly for HDACs 6 and 8 with IC50 of 2.47μM and 1.46 μM, greater than 8-fold selective against HDAC3 and no inhibition to HDAC1, 2, 4, 5, 7, 9, and 10.	Cytoskeletal Signaling	C11H14ClNO3	Free Base	N/A	CC1=CC(Cl)=CC=C1OCCCC(=O)NO |c:4,6,t:1|	2.4	2	1	5
S1424	Prazosin HCl	419.86	19237-84-4	Adrenergic Receptor	http://selleckchem.com/products/Prazosin-hydrochloride.html	Prazosin HCl is a competitive alpha-1 adrenoceptor antagonist, used to treat high blood pressure or benign prostatic hyperplasia.	GPCR & G Protein	C19H22ClN5O4	Hydrochloride	Minipress,Vasoflex,Pressin and Hypovase	Cl.COC1=CC2=C(C=C1OC)C(N)=NC(=N2)N1CCN(CC1)C(=O)C1=CC=CO1 |c:4,6,12,14,28,t:2,26|	2.489	6	1	4
S1425	Ranolazine 2HCl	500.46	95635-56-6	Calcium Channel	http://www.selleckchem.com/products/Ranolazine-dihydrochloride.html	Ranolazine 2HCl, is an antianginal medication.	Transmembrane Transporters	C24H35Cl2N3O4	Dihydrochloride	RS 43285-193, RS-43285, Ranexa, renolazine	Cl.Cl.COC1=CC=CC=C1OCC(O)CN1CCN(CC(=O)NC2=C(C)C=CC=C2C)CC1 |c:4,6,22,25,27,t:2|	3.755	3	2	9
S1426	Repaglinide	452.59	135062-02-1	Potassium Channel	http://www.selleckchem.com/products/Repaglinide.html	Repaglinide is for the treatment of type II diabetes.	Transmembrane Transporters	C27H36N2O4	Free Base	Prandin, GlucoNorm, NovoNorm	CCOC1=C(C=CC(CC(=O)N[C@@H](CC(C)C)C2=CC=CC=C2N2CCCCC2)=C1)C(O)=O |r,c:5,19,21,30,t:3,17|	5.307	3	1	10
S1430	Rolipram	275.34	61413-54-5	PDE	http://www.selleckchem.com/products/Rolipram.html	Rolipram is a PDE4-inhibitor and an anti-inflammatory agent.Phase 1.	Metabolism	C16H21NO3	Free Base	N/A	COC1=C(OC2CCCC2)C=C(C=C1)C1CNC(=O)C1 |c:2,11,13|	2.349	3	1	4
S1431	Sildenafil Citrate	666.7	171599-83-0	PDE	http://www.selleckchem.com/products/Sildenafil-citrate.html	Sildenafil, a selective inhibitor of cyclic guanosine monophosphate (cGMP)-specific phosphodiesterase type 5 (PDE5), is a well-tolerated and highly effective treatment for erectile dysfunction.	Metabolism	C28H38N6O11S	Citrate	Viagra, Revatio	OC(=O)CC(O)(CC(O)=O)C(O)=O.CCCC1=NN(C)C2=C1N=C(NC2=O)C1=CC(=CC=C1OCC)S(=O)(=O)N1CCN(C)CC1 |c:19,22,30,32,t:15,28|	-2.107	9	1	12
S1432	Sumatriptan Succinate	413.49	103628-48-4	5-HT Receptor	http://www.selleckchem.com/products/Sumatriptan-succinate.html	Sumatriptan Succinate is a triptan sulfa drug containing a sulfonamide group for the treatment of migraine headaches.	Neuronal Signaling	C18H27N3O6S	Succinate	Imigran, mitrex, Imitrex, Suminat, Sumitrex	OC(=O)CCC(O)=O.CNS(=O)(=O)CC1=CC=C2NC=C(CCN(C)C)C2=C1 |c:26,t:13,15,18|	-1.958	4	2	9
S1435	Tamsulosin hydrochloride	444.97	106463-17-6, 106133-20-4 (free base)	Others	http://selleckchem.com/products/Tamsulosin-hydrochloride.html	Tamsulosin hydrochloride is an antagonist of alpha1A adrenoceptors in the prostate.	Others	C20H29ClN2O5S	hydrochloride		Cl.CCOC1=C(OCCNC(C)CC2=CC=C(OC)C(=C2)S(N)(=O)=O)C=CC=C1 |c:3,18,25,27,t:12,14|	3.101	5	2	11
S1436	Tianeptine sodium	458.93	30123-17-2	5-HT Receptor	http://www.selleckchem.com/products/Tianeptine-sodium-salt.html	Tianeptine is a selective serotonin reuptake enhancer (SSRE) compound used for treating major depressive episodes.	Neuronal Signaling	C21H24ClN2NaO4S	Sodium Salt	Stablon, Coaxil, Tatinol	[Na+].CN1C2=C(C=CC=C2)C(NCCCCCCC([O-])=O)C2=CC=C(Cl)C=C2S1(=O)=O |c:4,6,25,t:2,20,22|	2.453	2	1	8
S1437	Tizanidine HCl	290.17	64461-82-1	Adrenergic Receptor	http://www.selleckchem.com/products/Tizanidine-hydrochloride.html	Tizanidine HCl is an α2-adrenergic receptor agonist and inhibits neurotransmitter release from CNS noradrenergic neurons.	Neuronal Signaling	C9H9Cl2N5S	Hydrochloride	Zanaflex, Sirdalud	Cl.ClC1=C(NC2=NCCN2)C2=NSN=C2C=C1 |c:1,13,16,t:4,10|	2.199	3	2	2
S1438	Topiramate	339.36	97240-79-4	Carbonic Anhydrase	http://www.selleckchem.com/products/Topiramate.html	Topiramate is an anticonvulsant compound.	Metabolism	C12H21NO8S	Free Base	Topamax	CC1(C)O[C@@H]2CO[C@@]3(COS(N)(=O)=O)OC(C)(C)O[C@H]3[C@@H]2O1 |r|	-1.932	6	1	3
S1439	Tranilast	327.33	53902-12-8	Immunology & Inflammation related	http://www.selleckchem.com/products/Tranilast.html	Tranilast is an antiallergic compound.	Others	C18H17NO5	Free Base	Rizaben, MK 341, Tranpro	COC1=C(OC)C=C(\C=C\C(=O)NC2=CC=CC=C2C(O)=O)C=C1 |c:2,15,17,23,t:6,13|	2.679	4	1	6
S1441	Venlafaxine HCl	313.86	99300-78-4	5-HT Receptor	http://www.selleckchem.com/products/Venlafaxine-hydrochloride.html	Venlafaxine is an arylalkanolamine serotonin-norepinephrine reuptake inhibitor (SNRI).	Neuronal Signaling	C17H28ClNO2	Hydrochloride	Effexor, Efexor	Cl.COC1=CC=C(C=C1)C(CN(C)C)C1(O)CCCCC1 |c:4,6,t:2|	3.404	1	0	5
S1442	Voriconazole	349.31	137234-62-9	P450 (e.g. CYP17)	http://www.selleckchem.com/products/Voriconazole.html	Voriconazole is a new triazole derivative similar to fluconazole and itraconazole that acts by inhibiting fungal cytochrome P-450-dependent, 14-alpha-sterol demethylase-mediated synthesis of ergosterol.	Metabolism	C16H14F3N5O	Free Base	Vfend	C[C@@H](C1=NC=NC=C1F)[C@](O)(CN1C=NC=N1)C1=CC=C(F)C=C1F |r,c:4,6,14,16,24,t:2,19,21|	2.071	4	0	5
S1443	Zileuton	236.29	111406-87-2	Lipoxygenase	http://www.selleckchem.com/products/Zileuton.html	Zileuton is an orally active inhibitor of 5-lipoxygenase, and thus inhibits leukotrienes (LTB4, LTC4, LTD4, and LTE4) formation.	Others	C11H12N2O2S	Free Base	ZYFLO	CC(N(O)C(N)=O)C1=CC2=CC=CC=C2S1 |c:11,13,t:7,9|	2.184	1	1	2
S1444	Ziprasidone HCl	449.4	122883-93-6	5-HT Receptor,Dopamine Receptor	http://www.selleckchem.com/products/Ziprasidone-hydrochloride.html	Ziprasidone HCl was the fifth atypical antipsychotic.	Others	C21H22Cl2N4OS	Hydrochloride	Geodon, Zeldox	Cl.ClC1=CC2=C(CC(=O)N2)C=C1CCN1CCN(CC1)C1=NSC2=C1C=CC=C2 |c:10,25,28,30,t:1,3,22|	4.641	2	1	4
S1445	Zonisamide	212.23	68291-97-4	Sodium Channel	http://www.selleckchem.com/products/Zonisamide.html	Zonisamide is a sulfonamide anticonvulsant approved for use as an adjunctive.	Others	C8H8N2O3S	Free Base	Zonegran	NS(=O)(=O)CC1=NOC2=CC=CC=C12 |c:10,t:5,8,12|	0.411	4	1	2
S1451	Aurora A Inhibitor I	588.07	1158838-45-9	Aurora Kinase	http://www.selleckchem.com/products/Aurora-A-Inhibitor-I.html	Aurora A Inhibitor I is a novel, potent, and selective inhibitor of Aurora A with IC50 of 3.4 nM. It is 1000-fold more selective for Aurora A than Aurora B.	Cell Cycle	C31H31ClFN7O2	Free Base	N/A	CCN1CCN(CC1)C(=O)CC1=CC=C(NC2=NC(NC3=CC=C(C=C3)C(=O)NC3=CC=CC=C3Cl)=C(F)C=N2)C=C1 |c:23,25,33,35,41,44,t:12,14,17,21,31,38|	5.621	4	3	9
S1452	Ispinesib (SB-715992)	517.06	336113-53-2	Kinesin	http://www.selleckchem.com/products/Ispinesib-mesilate(SB-715992).html	Ispinesib (SB-715992, CK0238273) is a potent, specific and reversible inhibitor of kinesin spindle protein (KSP) with Ki app of 1.7 nM, no inhibition to CENP-E, RabK6, MCAK, MKLP1, KHC or Kif1A. Phase 1/2.	Cytoskeletal Signaling	C30H33ClN4O2	Free Base	N/A	CC(C)[C@@H](N(CCCN)C(=O)C1=CC=C(C)C=C1)C1=NC2=C(C=CC(Cl)=C2)C(=O)N1CC1=CC=CC=C1 |r,c:16,23,26,36,38,t:11,13,19,21,34|	5.259	3	1	9
S1453	Tipifarnib	489.4	192185-72-1	Transferase	http://www.selleckchem.com/products/Tipifarnib(R115777).html	Tipifarnib (R115777) is a potent and specific farnesyltransferase (FTase) inhibitor with IC50 of 0.6 nM, its anti-proliferative effects are most prominent in H-ras or N-ras mutant cells. Phase 3.	Metabolism	C27H22Cl2N4O	Free Base	R115777	CN1C=NC=C1[C@@](N)(C1=CC=C(Cl)C=C1)C1=CC2=C(C=C1)N(C)C(=O)C=C2C1=CC(Cl)=CC=C1 |r,c:2,4,14,19,21,28,34,36,t:9,11,17,31|	4.808	2	1	4
S1454	PHA-680632	501.62	398493-79-3	Aurora Kinase	http://www.selleckchem.com/products/PHA-680632.html	PHA-680632 is potent inhibitor of Aurora A, Aurora B and Aurora C with IC50 of 27 nM, 135 nM and 120 nM, respectively. It has 10- to 200-fold higher IC50 for FGFR1, FLT3, LCK, PLK1, STLK2, and VEGFR2/3.	Cell Cycle	C28H35N7O2	Free Base	N/A	CCC1=CC=CC(CC)=C1NC(=O)N1CC2=C(C1)C(NC(=O)C1=CC=C(C=C1)N1CCN(C)CC1)=NN2 |c:4,8,16,26,28,38,t:2,24|	4.339	3	3	6
S1455	Cilomilast	343.42	153259-65-5	PDE	http://www.selleckchem.com/products/Cilomilast(SB-207499).html	Cilomilast is a potent PDE4 inhibitor with IC50 of about 110 nM, has anti-inflammatory activity and low central nervous system activity.	Metabolism	C20H25NO4	Free Base	N/A	[H]C1(CCC(CC1)(C#N)C1=CC(OC2CCCC2)=C(OC)C=C1)C(O)=O |c:23,t:10,19|	4.174	3	0	5
S1456	Zibotentan (ZD4054)	424.43	186497-07-4	Endothelin Receptor	http://www.selleckchem.com/products/Zibotentan(ZD4054).html	Zibotentan (ZD4054) is a specific Endothelin (ET)A antagonist with IC50 of 21 nM, exhibiting no activity at ETB. Phase 3.	GPCR & G Protein	C19H16N6O4S	Free Base	N/A	COC1=NC(C)=CN=C1NS(=O)(=O)C1=CC=CN=C1C1=CC=C(C=C1)C1=NN=CO1 |c:5,7,16,18,23,25,30,t:2,14,21,28|	1.456	9	1	6
S1457	Atazanavir Sulfate	802.93	229975-97-7	HIV Protease	http://www.selleckchem.com/products/Atazanavir.html	Atazanavir is a HIV protease inhibitor with Ki of 2.66 nM.	Proteases	C38H54N6O11S	Sulfate	BMS-232632-05, Reyataz	OS(O)(=O)=O.COC(=O)N[C@H](C(=O)N[C@@H](CC1=CC=CC=C1)[C@@H](O)CN(CC1=CC=C(C=C1)C1=NC=CC=C1)NC(=O)[C@@H](NC(=O)OC)C(C)(C)C)C(C)(C)C |r,c:17,19,29,31,36,38,t:15,27,34|	4.083	7	5	18
S1458	VX-745	436.26	209410-46-8	p38 MAPK	http://www.selleckchem.com/products/VX-745.html	VX-745 is a potent and selective inhibitor of p38α with IC50 of 10 nM, 22-fold greater selectivity versus p38β and no inhibition to p38γ.	MAPK	C19H9Cl2F2N3OS	Free Base	N/A	FC1=CC(F)=C(SC2=NN3C=NC(=O)C(=C3C=C2)C2=C(Cl)C=CC=C2Cl)C=C1 |c:10,14,17,20,23,25,29,t:1,4,7|	5.342	3	0	3
S1459	Thiazovivin	311.36	1226056-71-8	ROCK	http://www.selleckchem.com/products/Thiazovivin.html	Thiazovivin (Tzv) is a novel ROCK inhibitor with IC50 of 0.5 μM, promotes hESC survival after single-cell dissociation.	Cell Cycle	C15H13N5OS	Free Base	N/A	O=C(NCC1=CC=CC=C1)C1=CSC(NC2=CC=NC=N2)=N1 |c:6,8,18,20,22,t:4,11,16|	2.357	4	2	5
S1460	SP600125	220.23	129-56-6	JNK	http://www.selleckchem.com/products/SP600125.html	SP600125 is a broad-spectrum JNK inhibitor for JNK1, JNK2 and JNK3 with IC50 of 40 nM, 40 nM and 90 nM, respectively; 10-fold greater selectivity against MKK4, 25-fold greater selectivity against MKK3, MKK6, PKB, and PKCα, and 100-fold selectivity against ERK2, p38, Chk1, EGFR etc.	MAPK	C14H8N2O	Free Base	N/A	O=C1C2=C3C(NN=C3C3=C1C=CC=C3)=CC=C2 |c:6,9,12,14,16,18,t:2|	2.994	2	1	0
S1462	AZD6482	408.45	1173900-33-8	PI3K	http://www.selleckchem.com/products/azd6482.html	AZD6482 is a PI3Kβ inhibitor with IC50 of 10 nM, 8-, 87- and 109-fold more selective to PI3Kβ than PI3Kδ, PI3Kα and PI3Kγ. Phase 1.	PI3K/Akt/mTOR	C22H24N4O4	Free Base	N/A	C[C@@H](NC1=CC=CC=C1C(O)=O)C1=CC(C)=CN2C(=O)C=C(N=C12)N1CCOCC1 |r,c:5,7,16,21,t:3,13,23|	2.003	4	1	5
S1463	Ofloxacin	361.37	82419-36-1	Topoisomerase	http://selleckchem.com/products/Ofloxacin(Floxin).html	Ofloxacin is a synthetic broad-spectrum antimicrobial agent.	DNA Damage	C18H20FN3O4	Free Base	DL-8280, HOE-280, Exocin, Flobacin, Floxin, Floxil, Monoflocet	CC1COC2=C(N3CCN(C)CC3)C(F)=CC3=C2N1C=C(C(O)=O)C3=O |c:4,15,17,t:22|
S1464	Marbofloxacin	362.36	115550-35-1	Topoisomerase	http://www.selleckchem.com/products/Marbofloxacin.html	Marbofloxacin is a potent antibiotic inhibiting bacterial <b>DNA</b> replication.	DNA Damage	C17H19FN4O4	Free Base	Marbocyl, Zeniquin	CN1CCN(CC1)C1=C(F)C=C2C(=O)C(=CN3N(C)COC1=C23)C(O)=O |c:8,15,23,t:11|	-2.038	3	0	2
S1465	Moxifloxacin HCl	437.89	186826-86-8	Topoisomerase	http://www.selleckchem.com/products/Moxifloxacin.html	Moxifloxacin is a fourth-generation synthetic fluoroquinolone antibacterial agent.	DNA Damage	C21H25ClFN3O4	Hydrochloride	Avelox, Avalox	Cl.[H][C@]12CN(C[C@@]1([H])NCCC2)C1=C(F)C=C2C(=O)C(=CN(C3CC3)C2=C1OC)C(O)=O |r,c:13,20,28,t:16|	-0.32	3	1	4
S1467	Doxercalciferol	412.65	54573-75-0	Vitamin	http://www.selleckchem.com/products/Doxercalciferol(Hectorol).html	Doxercalciferol is a synthetic analog of vitamin D.	Others	C28H44O2	Free Base	Hectorol	[H][C@@]1(CC[C@]2([H])[C@]1(C)CCC\C2=C/C=C1\C[C@@H](O)C[C@H](O)C1=C)[C@H](C)\C=C\[C@@H](C)C(C)C |r|	6.337	0	2	5
S1468	Alfacalcidol	400.64	41294-56-8	Vitamin	http://www.selleckchem.com/products/Alfacalcidol.html	Alfacalcidol is a non-selective VDR activator medication.	Endocrinology & Hormones	C27H44O2	Free Base	Alpha D3, Etalpha	[H][C@@]12CC[C@H]([C@H](C)CCCC(C)C)[C@@]1(C)CCC\C2=C\C=C1/C[C@@H](O)C[C@H](O)C1=C |r|	6.53	0	2	6
S1469	Calcifediol	400.64	19356-17-3	Vitamin	http://selleckchem.com/products/Calcifediol.html	Calcifediol is a major circulating metabolite of vitamin D3 and acts as a competitive inhibitor with an apparent Ki of 3.9 μM. It also suppresses PTH secretion and mRNA (ED50=2 nM).	Others	C27H44O2	Free Base	Calcidiol, Didrogyl, Hidroferol	[H][C@@]1(CC[C@]2([H])[C@]1(C)CCC\C2=C/C=C1/C[C@@H](O)CCC1=C)[C@H](C)CCCC(C)(C)O |r|	6.404	0	1	6
S1470	Orantinib (TSU-68, SU6668)	310.35	252916-29-3	FGFR,PDGFR,VEGFR	http://www.selleckchem.com/products/TSU-68(SU6668).html	SU6668 has greatest potency against PDGFR autophosphorylation with Ki of 8 nM, but also strongly inhibits Flk-1 and FGFR1 trans-phosphorylation, little activity against IGF-1R, Met, Src, Lck, Zap70, Abl and CDK2; does not inhibit EGFR. Phase 3.	Protein Tyrosine Kinase	C18H18N2O3	Free Base	SU6668	CC1=C(CCC(O)=O)C(C)=C(N1)\C=C1/C(=O)NC2=CC=CC=C12 |c:1,9,20,t:18,22|	2.868	2	2	4
S1472	Safinamide Mesylate	398.45	202825-46-5	MAO	http://www.selleckchem.com/products/Safinamide-mesilate.html	Safinamide Mesylate is mesylate salt of Safinamide, selectively and reversibly inhibits MAO-B with IC50 of 98 nM, exhibits 5918-fold selectivity against MAO-A. Phase 3.	Metabolism	C18H23FN2O5S	Mesylate	FCE-28073(R-isomer), PNU-151774E, NW-1015	CS(O)(=O)=O.C[C@H](NCC1=CC=C(OCC2=CC(F)=CC=C2)C=C1)C(N)=O |r,c:17,19,22,t:8,10,14|	2.064	2	2	7
S1474	GSK429286A	432.37	864082-47-3	ROCK	http://www.selleckchem.com/products/GSK429286A.html	GSK429286A is a selective inhibitor of ROCK1 and ROCK2 with IC50 of 14 nM and 63 nM, respectively.	Cell Cycle	C21H16F4N4O2	Free Base	N/A	CC1=C(C(CC(=O)N1)C1=CC=C(C=C1)C(F)(F)F)C(=O)NC1=C(F)C=C2NN=CC2=C1 |c:11,13,23,29,32,t:1,9,26|	3.033	3	3	4
S1475	Pimasertib (AS-703026)	431.2	1236699-92-5	MEK	http://www.selleckchem.com/products/AS703026.html	AS-703026 is a highly selective, potent, ATP non-competitive allosteric inhibitor of MEK1/2 with IC50 of 5 nM-2 μM in MM cell lines. Phase 1/2.	MAPK	C15H15FIN3O3	Free Base	N/A	OC[C@@H](O)CNC(=O)C1=CC=NC=C1NC1=C(F)C=C(I)C=C1 |r,c:10,12,16,22,t:8,19|	1.171	2	4	6
S1476	SB525334	343.42	356559-20-1	TGF-beta/Smad	http://www.selleckchem.com/products/SB-525334.html	SB525334 is a potent and selective inhibitor of TGFβ receptor I (ALK5) with IC50 of 14.3 nM, is 4-fold less potent to ALK4 than ALK5 and inactive to ALK2, 3, and 6.	TGF-beta/Smad	C21H21N5	Free Base	N/A	CC1=NC(=CC=C1)C1=C(NC(=N1)C(C)(C)C)C1=CC=C2N=CC=NC2=C1 |c:3,5,11,22,24,27,t:1,8,18,20|	4.305	4	1	3
S1480	Lomibuvir (VX-222, VCH-222)	445.61	1026785-55-6	HCV Protease	http://www.selleckchem.com/products/VX-222.html	VX-222 (VCH-222) is a novel, potent and selective inhibitor of HCV polymerase with IC50 of 0.94-1.2 μM, 15.3-fold less effective for mutant M423T, and 108-fold less effective for mutant I482L. Phase 2.	Proteases	C25H35NO4S	Free Base	VCH222	C[C@H]1CC[C@@H](CC1)C(=O)N([C@@H]1CC[C@H](O)CC1)C1=C(SC(=C1)C#CC(C)(C)C)C(O)=O |r,c:22,t:19|	6.021	2	1	6
S1481	Zosuquidar (LY335979) 3HCl	636.99	167465-36-3	P-gp	http://www.selleckchem.com/products/LY335979.html	Zosuquidar (LY335979) is a potent modulator of P-glycoprotein-mediated multi-drug resistance with Ki of 60 nM. Phase 3.	Transmembrane Transporters	C32H34Cl3F2N3O2	Trihydrochlorid	RS-33295-198	Cl.Cl.Cl.O[C@@H](COC1=CC=CC2=C1C=CC=N2)CN1CCN(CC1)[C@@H]1C2=C(C=CC=C2)[C@@H]2[C@H](C3=C1C=CC=C3)C2(F)F |r,c:6,8,11,13,27,29,34,37,39,t:4,25|	5.845	2	1	6
S1482	Daclatasvir (BMS-790052)	738.88	1009119-64-5	HCV Protease	http://www.selleckchem.com/products/BMS-790052.html	BMS-790052 is a highly selective inhibitor of HCV NS5A with EC50 of 9-50 pM, for a broad range of HCV replicon genotypes and the JFH-1 genotype 2a infectious virus in cell culture. Phase 3.	Proteases	C40H50N8O6	Free Base	N/A	COC(=O)N[C@@H](C(C)C)C(=O)N1CCC[C@H]1C1=NC=C(N1)C1=CC=C(C=C1)C1=CC=C(C=C1)C1=CN=C(N1)[C@@H]1CCCN1C(=O)[C@@H](NC(=O)OC)C(C)C |r,c:19,25,27,32,34,39,t:17,23,30,37|	5.048	8	4	13
S1483	Iloperidone	426.48	133454-47-4	5-HT Receptor	http://www.selleckchem.com/products/Iloperidone(Fanapt).html	Iloperidone is an atypical antipsychotic for the treatment of schizophrenia.	Others	C24H27FN2O4	Free Base	Fanapta, Zomaril	COC1=C(OCCCN2CCC(CC2)C2=NOC3=C2C=CC(F)=C3)C=CC(=C1)C(C)=O |c:2,18,21,24,27,29,t:15|	4.016	5	0	8
S1484	MC1568	314.31	852475-26-4	HDAC	http://www.selleckchem.com/products/MC1568.html	MC1568 is a selective HDAC inhibitor for maize HD1-A with IC50 of 100 nM. It is 34-fold more selective for HD1-A than HD1-B.	Cytoskeletal Signaling	C17H15FN2O3	Free Base	N/A	CN1C=C(\C=C\C(=O)C2=CC=CC(F)=C2)C=C1\C=C\C(=O)NO |c:10,13,16,t:2,8|	2.981	2	1	5
S1485	HMN-214	424.47	173529-46-9	PLK	http://www.selleckchem.com/products/HMN-214.html	HMN-214 is a prodrug of HMN-176, which alters the cellular spatial orientation of Plk1.	Cell Cycle	C22H20N2O5S	Free Base	N/A	COC1=CC=C(C=C1)S(=O)(=O)N(C(C)=O)C1=C(\C=C\C2=CC=[N+]([O-])C=C2)C=CC=C1 |c:4,6,16,25,28,30,t:2,20,22|	2.282	4	0	6
S1486	AEE788 (NVP-AEE788)	440.58	497839-62-0	EGFR,HER2,VEGFR	http://www.selleckchem.com/products/AEE788.html	AEE788 is a potent inhibitor of EGFR and HER2/ErbB2 with IC50 of 2 nM and 6 nM, less potent to VEGFR2/KDR, c-Abl, c-Src, and Flt-1, does not inhibit Ins-R, IGF-1R, PKCα and CDK1. Phase 1/2.	Protein Tyrosine Kinase	C27H32N6	Free Base	N/A	CCN1CCN(CC2=CC=C(C=C2)C2=CC3=C(N[C@H](C)C4=CC=CC=C4)N=CN=C3N2)CC1 |r,c:9,11,16,23,25,28,30,t:7,14,21|	5.042	2	2	7
S1487	PHA-793887	361.48	718630-59-2	CDK	http://www.selleckchem.com/products/PHA-793887.html	PHA-793887 is a novel and potent inhibitor of CDK2, CDK5 and CDK7 with IC50 of 8 nM, 5 nM and 10 nM. It is greater than 6-fold more selective for CDK2, 5, and 7 than CDK1, 4, and 9. Phase 1.	Cell Cycle	C19H31N5O2	Free Base	N/A	CC(C)CC(=O)NC1=NNC2=C1CN(C(=O)C1CCN(C)CC1)C2(C)C |c:10,t:7|	1.895	3	2	4
S1488	Naratriptan HCl	371.93	143388-64-1	5-HT Receptor	http://www.selleckchem.com/products/Naratriptan(Amerge).html	Naratriptan (Amerge) is a triptan agent that is used for the treatment of migraine headaches.	Neuronal Signaling	C17H26ClN3O2S	Hydrochloride	Amerge, Naramig	Cl.CNS(=O)(=O)CCC1=CC=C2NC=C(C3CCN(C)CC3)C2=C1 |c:23,t:7,9,12|	2.435	2	2	5
S1489	PIK-93	389.88	593960-11-3	PI3K	http://www.selleckchem.com/products/PIK-93.html	PIK-93 is the first potent, synthetic PI4K (PI4KIIIβ) inhibitor with IC50 of 19 nM; shown to inhibit PI3Kα with IC50 of 39 nM.	PI3K/Akt/mTOR	C14H16ClN3O4S2	Free Base	N/A	CC(=O)NC1=NC(C)=C(S1)C1=CC(=C(Cl)C=C1)S(=O)(=O)NCCO |c:7,16,t:4,11,13|	1.076	4	3	6
S1490	Ponatinib (AP24534)	532.56	943319-70-8	Bcr-Abl,FGFR,PDGFR,VEGFR	http://www.selleckchem.com/products/AP24534.html	Ponatinib (AP24534) is a novel, potent multi-target inhibitor of Abl, PDGFRα, VEGFR2, FGFR1 and Src with IC50 of 0.37 nM, 1.1 nM, 1.5 nM, 2.2 nM and 5.4 nM, respectively.	Angiogenesis	C29H27F3N6O	Free Base	N/A	CN1CCN(CC2=C(C=C(NC(=O)C3=CC(C#CC4=CN=C5C=CC=NN45)=C(C)C=C3)C=C2)C(F)(F)F)CC1 |c:22,24,31,34,t:6,8,13,18,20,28|	4.884	3	1	7
S1491	Fludarabine	285.23	21679-14-1	DNA/RNA Synthesis,STAT	http://www.selleckchem.com/products/Fludarabine(Fludara).html	Fludarabine is a <b>STAT1</b> activation inhibitor and a <b>DNA</b> synthesis inhibitor in Vascular smooth muscle cells.	JAK/STAT	C10H12FN5O4	Free Base	F-ara-A, NSC 118218	NC1=NC(F)=NC2=C1N=CN2[C@@H]1O[C@H](CO)[C@@H](O)[C@@H]1O |r,c:4,6,9,t:1|	-1.312	4	4	2
S1497	Pralatrexate	477.47	146464-95-1	DHFR	http://www.selleckchem.com/products/Pralatrexate(Folotyn).html	Pralatrexate(Folotyn) is an antifolate, and structurally a folate analog. Its IC50 is < 300 nM in some cell lines.	Metabolism	C23H23N7O5	Free Base	Folotyn	NC1=NC(N)=C2N=C(CC(CC#C)C3=CC=C(C=C3)C(=O)N[C@@H](CCC(O)=O)C(O)=O)C=NC2=N1 |r,c:15,17,32,35,t:1,4,6,13|	1.94	7	3	10
S1500	Betamethasone	392.46	378-44-9	Glucocorticoid Receptor	http://www.selleckchem.com/products/Betamethasone-(Celestone).html	Betamethasone is a glucocorticoid steroid with anti-inflammatory and immunosuppressive properties.	Others	C22H29FO5	Free Base	Celestone, Betadexamethasone, Flubenisolone, Sch-4831, NCS-39470	[H][C@@]12C[C@H](C)[C@](O)(C(=O)CO)[C@@]1(C)C[C@H](O)[C@@]1(F)[C@@]2([H])CCC2=CC(=O)C=C[C@]12C |r,c:28,t:24|	1.708	2	2	2
S1501	Mycophenolate Mofetil	433.49	128794-94-5	Dehydrogenase	http://www.selleckchem.com/products/Mycophenolate-mofetil-(CellCept).html	Mycophenolate Mofetil is a non-competitive, selective and reversible inhibitor of inosine monophosphate dehydrogenase I/II with IC50 of 39 nM and 27 nM, respectively.	Metabolism	C23H31NO7	Free Base	CellCept, RS 61443, TM-MMF	COC1=C(C)C2=C(C(=O)OC2)C(O)=C1C\C=C(/C)CCC(=O)OCCN1CCOCC1 |c:2,13,t:5|	3.209	6	1	10
S1504	Dyphylline	254.24	479-18-5	PDE	http://www.selleckchem.com/products/Dyphylline(Dilor).html	Dyphylline is a xanthine derivative with bronchodilator and vasodilator effects.	Metabolism	C10H14N4O4	Free Base	Neothylline, Lufyllin, diprophylline	CN1C2=C(N(CC(O)CO)C=N2)C(=O)N(C)C1=O |c:10,t:2|	-1.151	3	2	3
S1505	Aztreonam	435.43	78110-38-0	Antifection	http://www.selleckchem.com/products/Aztreonam(Azactam).html	Aztreonam is a synthetic monocyclic beta-lactam antibiotic.	Others	C13H17N5O8S2	Free Base	Monobactam, SQ 26776, Squibb 26776	C[C@H]1[C@H](NC(=O)C(=N/OC(C)(C)C(O)=O)\C2=CSC(N)=N2)C(=O)N1S(O)(=O)=O |r,c:19,t:15|	-1.035	6	2	7
S1507	Irbesartan	428.53	138402-11-6	RAAS	http://selleckchem.com/products/Irbesartan(Avapro).html	Irbesartan (SR-47436, BMS-186295) is a highly potent and specific angiotensin II type 1 (AT1) receptor antagonist with IC50 of 1.3 nM.	Endocrinology & Hormones	C25H28N6O	Free Base	BMS-186295, SR-47436	CCCCC1=NC2(CCCC2)C(=O)N1CC1=CC=C(C=C1)C1=CC=CC=C1C1=NNN=N1 |c:19,21,26,28,34,t:4,17,24,31|
S1508	Alprostadil	354.48	745-65-3	Immunology & Inflammation related	http://www.selleckchem.com/products/Alprostadil(Caverject).html	Alprostadil is used as a drug in the treatment of erectile dysfunction and has vasodilatory properties.	Others	C20H34O5	Free Base	Prostaglandin E1, Edex, Muse, Liprostin	CCCCC[C@H](O)\C=C\[C@H]1[C@H](O)CC(=O)[C@@H]1CCCCCCC(O)=O |r|	3.644	2	2	13
S1509	Norfloxacin	319.33	70458-96-7	Topoisomerase	http://selleckchem.com/products/Norfloxacin(Norxacin).html	Norfloxacin is a broad-spectrum antibiotic.	DNA Damage	C16H18FN3O3	Free Base	Chibroxin, MK-366, Baccidal, Sebercim, Zoroxin	CCN1C=C(C(O)=O)C(=O)C2=CC(F)=C(C=C12)N1CCNCC1 |c:13,t:3,10,15|
S1511	Lactulose	342.3	4618-18-2	Others	http://www.selleckchem.com/products/Lactulose(Enulose).html	Lactulose, a disaccharide composed of galactose and fructose, is a stimulator of health-promoting bacterium growth in the gastrointestinal tract, used to treat chronic constipation and hepatic encephalopathy._x000D_	Others	C12H22O11	Free Base	N/A	[H][C@@](O[C@@H]1O[C@H](CO)[C@H](O)[C@H](O)[C@H]1O)([C@H](O)CO)[C@H](O)C(=O)CO |r|	-4.621	3	8	8
S1512	Tadalafil	389.4	171596-29-5	PDE	http://www.selleckchem.com/products/Tadalafil(Cialis).html	Tadalafil is a PDE-5 inhibitor with IC50 of 1.8 nM.	Metabolism	C22H19N3O4	Free Base	IC 351	[H][C@]12CC3=C(NC4=C3C=CC=C4)[C@H](N1C(=O)CN(C)C2=O)C1=CC=C2OCOC2=C1 |r,c:6,9,11,33,t:3,25,27|	2.183	4	1	1
S1514	Cyclosporine	1202.61	79217-60-0	phosphatase	http://www.selleckchem.com/products/Cyclosporine.html	Cyclosporine (Neoral) is an immunosuppressant drug.	Others	C62H111N11O12	Free Base	Sandimmune, Gengraf, Restasis, Atopica, Sangcya	CCC1NC(=O)C([C@H](O)[C@H](C)C\C=C\C)N(C)C(=O)C(C(C)C)N(C)C(=O)C(CC(C)C)N(C)C(=O)C(CC(C)C)N(C)C(=O)C(C)NC(=O)C(C)NC(=O)C(CC(C)C)N(C)C(=O)C(NC(=O)C(CC(C)C)N(C)C(=O)CN(C)C1=O)C(C)C |r|	4.333	11	5	15
S1515	Pracinostat (SB939)	358.48	929016-96-6	HDAC	http://www.selleckchem.com/products/SB939.html	SB939 is a potent pan-HDAC inhibitor with IC50 of 40-140 nM with exception for HDAC6. It has no activity against the class III isoenzyme SIRT I. Phase 2.	Cytoskeletal Signaling	C20H30N4O2	Free Base	N/A	CCCCC1=NC2=CC(=CC=C2N1CCN(CC)CC)\C=C\C(=O)NO |c:8,10,t:4,6|	3.71	2	1	10
S1517	Natamycin	665.73	7681-93-8	Antifection	http://www.selleckchem.com/products/Natamycin(Pimaricin).htm	Natamycin is a naturally occurring antifungal agent.	Others	C33H47NO13	Free Base	Pimaricin	[H][C@@]12C[C@H](O)C[C@]3(O)C[C@H](O)[C@@H](C(O)=O)[C@]([H])(CC(O[C@]4([H])O[C@H](C)[C@@H](O)[C@H](N)[C@@H]4O)\C=C\C=C\C=C\C=C\C[C@@H](C)OC(=O)\C=C\[C@H]1O2)O3 |r,t:32,34,36,38,46|	-2.824	7	5	3
S1523	Voxtalisib (SAR245409, XL765) Analogue	599.66	1349796-36-6	mTOR,PI3K	http://www.selleckchem.com/products/XL765(SAR245409).html#	SAR245409 (XL765) is a dual inhibitor of mTOR/PI3K, mostly for p110γ with IC50 of 9 nM; also inhibits DNA-PK and mTOR. Phase 1/2.	PI3K/Akt/mTOR	C31H29N5O6S	Free Base	N/A	COC1=CC(NC2=NC3=CC=CC=C3N=C2NS(=O)(=O)C2=CC=C(NC(=O)C3=CC=C(C)C(OC)=C3)C=C2)=CC(OC)=C1 |c:10,12,15,36,39,41,45,t:2,6,8,22,24,29,31|	5.631	8	3	10
S1524	AT7519	382.24	844442-38-2	CDK	http://www.selleckchem.com/products/AT7519.html	AT7519 is a multi-CDK inhibitor for CDK1, 2, 4, 6 and 9 with IC50 of 10-210 nM. It is less potent to CDK3 and little active to CDK7. Phase 1.	Cell Cycle	C16H17Cl2N5O2	Free Base	N/A	ClC1=CC=CC(Cl)=C1C(=O)NC1=CNN=C1C(=O)NC1CCNCC1 |c:3,6,15,t:1,12|	1.599	3	4	4
S1525	MK-1775	500.6	955365-80-7	Wee1	http://www.selleckchem.com/products/MK-1775.html	MK-1775 is a potent and selective Wee1 inhibitor with IC50 of 5.2 nM; hinders G2 DNA damage checkpoint. Phase 2.	Cell Cycle	C27H32N8O2	Free Base	N/A	CN1CCN(CC1)C1=CC=C(NC2=NC3=C(C=N2)C(=O)N(CC=C)N3C2=NC(=CC=C2)C(C)(C)O)C=C1 |c:15,17,30,32,39,t:8,10,13,28|	4.158	4	1	7
S1526	Quizartinib (AC220)	560.67	950769-58-1	FLT3	http://www.selleckchem.com/products/AC-220.html	Quizartinib (AC220) is a second-generation FLT3 inhibitor for Flt3(ITD/WT) with IC50 of 1.1 nM/4.2 nM, 10-fold more selective for Flt3 than KIT, PDGFRα, PDGFRβ, RET, and CSF-1R. Phase 1/2.	Angiogenesis	C29H32N6O4S	Free Base	N/A	CC(C)(C)C1=CC(NC(=O)NC2=CC=C(C=C2)C2=CN3C(SC4=CC(OCCN5CCOCC5)=CC=C34)=N2)=NO1 |c:13,15,35,40,42,t:4,11,18,23,37|	5.064	6	2	8
S1528	LY2811376	320.36	1194044-20-6	BACE,Beta Amyloid	http://www.selleckchem.com/products/LY2811376.html	LY2811376 is the first orally available non-peptidic β-secretase(BACE1) inhibitor with IC50 of 239 nM-249 nM, that act to decrease Aβ secretion with EC50 of 300 nM, demonstrated to have 10-fold selectivity towards BACE1 over BACE2, and more than 50-fold inhibition over other aspartic proteases including cathepsin D, pepsin, or renin. Phase 1.	Proteases	C15H14F2N4S	Free Base	LY 2811376	C[C@]1(CCSC(N)=N1)C1=CC(=C(F)C=C1F)C1=CN=CN=C1 |r,c:6,14,20,22,t:9,11,18|	2.478	3	1	2
S1529	Hesperadin	516.65	422513-13-1	Aurora Kinase	http://www.selleckchem.com/products/Hesperadin.html	Hesperadin potently inhibits Aurora B with IC50 of 250 nM. It markedly reduces the activity of AMPK, Lck, MKK1, MAPKAP-K1, CHK1 and PHK while it does not inhibit MKK1 activity in vivo.	Cell Cycle	C29H32N4O3S	Free Base	N/A	CCS(=O)(=O)NC1=CC=C2NC(=O)\C(C2=C1)=C(/NC1=CC=C(CN2CCCCC2)C=C1)C1=CC=CC=C1 |c:15,32,37,39,t:6,8,20,22,35|	4.071	3	3	8
S1530	BIX 02188	412.48	1094614-84-2	MEK	http://www.selleckchem.com/products/BIX-02188.html	BIX02188 is a selective inhibitor of MEK5 with IC50 of 4.3 nM, also inhibits ERK5 catalytic activity with IC50 of 810 nM, and does not inhibit closely related kinases MEK1, MEK2, ERK2, and JNK2.	MAPK	C26H26N4O2	Free Base	N/A	CNC(=O)C1=CC=C2C(NC(=O)\C2=C(/NC2=CC(CN(C)C)=CC=C2)C2=CC=CC=C2)=C1 |c:6,22,24,29,31,33,t:4,16,27|	3.102	2	3	6
S1531	BIX 02189	440.54	1094614-85-3	MEK	http://www.selleckchem.com/products/BIX-02189.html	BIX02189 is a selective inhibitor of MEK5 with IC50 of 1.5 nM, also inhibits ERK5 catalytic activity with IC50 of 810 nM, and does not inhibit closely related kinases MEK1, MEK2, ERK2, and JNK2.	MAPK	C27H28N4O2	Free Base	N/A	CN(C)CC1=CC=CC(N\C(C2=CC=CC=C2)=C2/C(=O)NC3=CC(=CC=C23)C(=O)N(C)C)=C1 |c:6,13,15,24,34,t:4,11,22,26|	3.308	2	2	6
S1532	AZD7762	362.42	860352-01-8	Chk	http://www.selleckchem.com/products/AZD7762.html	AZD7762 is a potent and selective inhibitor of Chk1 with IC50 of 5 nM. It is equally potent against Chk2 and less potent against CAM, Yes, Fyn, Lyn, Hck and Lck. Phase 1.	Cell Cycle	C17H19FN4O2S	Free Base	N/A	NC(=O)NC1=C(SC(=C1)C1=CC(F)=CC=C1)C(=O)N[C@H]1CCCNC1 |r,c:7,13,15,t:4,10|	2.009	2	4	4
S1533	R406 (free base)	470.45	841290-80-0	Syk	http://www.selleckchem.com/products/R406(free-base).html	R406 (free base) is a potent Syk inhibitor with IC50 of 41 nM, strongly inhibits Syk but not Lyn, 5-fold less potent to Flt3. Phase 2.	Angiogenesis	C22H23FN6O5	Free Base	N/A	COC1=CC(NC2=NC(NC3=NC4=C(OC(C)(C)C(=O)N4)C=C3)=C(F)C=N2)=CC(OC)=C1OC |c:22,27,29,33,t:2,6,10,12,24|	3.881	8	3	7
S1534	Org 27569	409.95	868273-06-7	Cannabinoid Receptor	http://www.selleckchem.com/products/Org-27569.html	Org 27569 is an allosteric modulator of cannabinoid CB1 receptor, induces a CB1 receptor state that is characterized by enhanced agonist affinity and decreased inverse agonist affinity.	GPCR & G Protein	C24H28ClN3O	Free Base	ab120342	CCC1=C(NC2=CC=C(Cl)C=C12)C(=O)NCCC1=CC=C(C=C1)N1CCCCC1 |c:21,23,t:2,5,7,10,19|	6.213	1	2	6
S1536	CP-673451	417.5	343787-29-1	PDGFR	http://www.selleckchem.com/products/CP-673451.html	CP 673451 is a selective inhibitor of PDGFRα/β with IC50 of 10 nM/1 nM, exhibits >450-fold selectivity over other angiogenic receptors, has antiangiogenic and antitumor activity.	Protein Tyrosine Kinase	C24H27N5O2	Free Base	CP673451	COCCOC1=CC=C2N(C=NC2=C1)C1=NC2=C(C=CC=C2C=C1)N1CCC(N)CC1 |c:10,13,20,22,25,t:5,7,16,18|	3.011	4	1	6
S1537	DMXAA (Vadimezan)	282.29	117570-53-3	VDA	http://www.selleckchem.com/products/DMXAA(ASA404).html	DMXAA (Vadimezan) is a vascular disrupting agents (VDA) and competitive inhibitor of DT-diaphorase with Ki of 20 μM and IC50 of 62.5 μM, respectively. Phase 3.	Angiogenesis	C17H14O4	Free Base	AS-1404, 5,6-MeXAA, NSC-640488, Vadimezan	CC1=C(C)C2=C(C=C1)C(=O)C1=C(O2)C(CC(O)=O)=CC=C1 |c:1,4,6,11,19,21|	3.601	3	0	2
S1538	Telaprevir (VX-950)	679.85	402957-28-2	HCV Protease	http://www.selleckchem.com/products/Telaprevir(VX-950).html	Telaprevir (VX-950) is an HCV NS3-4A serine protease inhibitor with IC50 of 0.35 μM.	Proteases	C36H53N7O6	Free Base	LY-570310, MP-424	[H][C@@]12CCC[C@]1([H])[C@H](N(C2)C(=O)[C@@H](NC(=O)[C@@H](NC(=O)C1=NC=CN=C1)C1CCCCC1)C(C)(C)C)C(=O)N[C@@H](CCC)C(=O)C(=O)NC1CC1 |r,c:24,26,t:22|	2.685	8	4	14
S1540	Saxagliptin	315.41	361442-04-8	DPP-4	http://www.selleckchem.com/products/Saxagliptin(Onglyza).html	Saxagliptin is a selective and reversible DPP4 inhibitor with IC50 of 26 nM.	Proteases	C18H25N3O2	Free Base	N/A	[H][C@@]12C[C@]1([H])N([C@@H](C2)C#N)C(=O)[C@@H](N)C12CC3CC(CC(O)(C3)C1)C2 |r|	0.275	1	1	2
S1541	Selisistat (EX 527)	248.71	49843-98-3	Sirtuin	http://www.selleckchem.com/products/EX-527.html	EX 527 is a potent and selective SIRT1 inhibitor with IC50 of 38 nM, exhibits >200-fold selectivity against SIRT2 and SIRT3.	Epigenetics	C13H13ClN2O	Free Base	SEN0014196	NC(=O)C1CCCC2=C1NC1=C2C=C(Cl)C=C1 |c:7,11,17,t:14|	3.149	1	2	1
S1544	AM1241	503.33	444912-48-5	Cannabinoid Receptor	http://www.selleckchem.com/products/AM-1241.html	AM-1241 is a selective cannabinoid CB2 receptor agonist with Ki of 3.4 nM, exhibits 82-fold selectivity over CB1 receptor.	GPCR & G Protein	C22H22IN3O3	Free Base	AM1241	CN1CCCCC1CN1C=C(C(=O)C2=CC(=CC=C2I)[N+]([O-])=O)C2=C1C=CC=C2 |c:16,18,25,28,30,t:10,14|	5.29	1	0	5
S1545	SB408124	356.37	288150-92-5	OX Receptor	http://www.selleckchem.com/products/SB-408124.html	SB408124 (Tocris-1963) is a non-peptide antagonist for OX1 receptor with Ki of 57 nM and27 nM in both whole cell and membrane, respectively, exhibits 50-fold selectivity over OX2 receptor.	GPCR & G Protein	C19H18F2N4O	Free Base	N/A	CN(C)C1=CC=C(NC(=O)NC2=CC(C)=NC3=C(F)C=C(F)C=C23)C=C1 |c:14,16,26,t:3,5,11,19,22|	3.565	2	2	3
S1547	Febuxostat	316.37	144060-53-7	Others	http://www.selleckchem.com/products/Febuxostat(Uloric).html	Febuxostat is selective xanthine oxidase inhibitor with Ki of 0.6 nM.	Others	C16H16N2O3S	Free Base	Adenuric	CC(C)COC1=C(C=C(C=C1)C1=NC(C)=C(S1)C(O)=O)C#N |c:7,9,15,t:5,12|	3.468	3	0	5
S1548	Dapagliflozin	408.87	461432-26-8	SGLT	http://www.selleckchem.com/products/Dapagliflozin.html	Dapagliflozin is a potent and selective hSGLT2 inhibitor with EC50 of 1.1 nM, exhibiting 1200-fold selectivity over hSGLT1. Phase 3.	GPCR & G Protein	C21H25ClO6	Free Base	BMS-512148	CCOC1=CC=C(CC2=CC(=CC=C2Cl)[C@@H]2O[C@H](CO)[C@@H](O)[C@H](O)[C@H]2O)C=C1 |r,c:10,12,28,t:3,5,8|	2.409	2	4	6
S1549	Nebivolol	441.9	152520-56-4	Adrenergic Receptor	http://www.selleckchem.com/products/Nebivolol(Bystolic).html	Nebivolol selectively inhibits β1-adrenoceptor with IC50 of 0.8 nM.	Neuronal Signaling	C22H26ClF2NO4	Hydrochloride	N/A	Cl.[H][C@]1(CCC2=CC(F)=CC=C2O1)[C@@H](O)CNC[C@H](O)[C@@]1([H])CCC2=C(O1)C=CC(F)=C2 |r,c:7,9,25,29,32,t:4|	3.939	2	3	6
S1550	Pimobendan	334.37	74150-27-9	PDE	http://www.selleckchem.com/products/Pimobendan(Vetmedin).html	Pimobendan is a selective inhibitor of PDE3 with IC50 of 0.32 μM.	Metabolism	C19H18N4O2	Free Base	Acardi, pimobendane	COC1=CC=C(C=C1)C1=NC2=CC(=CC=C2N1)C1=NNC(=O)CC1C |c:4,6,13,15,t:2,9,11,20|	2.936	4	2	3
S1555	AZD8055	465.54	1009298-09-2	mTOR	http://www.selleckchem.com/products/AZD8055.html	AZD8055 is a novel ATP-competitive mTOR inhibitor with IC50 of 0.8 nM with excellent selectivity (∼1,000-fold) against PI3K isoforms and ATM/DNA-PK. Phase 1.	PI3K/Akt/mTOR	C25H31N5O4	Free Base	N/A	COC1=C(CO)C=C(C=C1)C1=NC2=C(C=C1)C(=NC(=N2)N1CCOC[C@@H]1C)N1CCOC[C@@H]1C |r,c:2,6,8,13,15,18,20,t:11|	3.274	6	1	5
S1556	PHT-427	409.61	1191951-57-1	Akt,PDK	http://www.selleckchem.com/products/PHT-427.html	PHT-427 is a dual Akt and PDPK1 inhibitor (high affinity binding for the PH domains of Akt and PDPK1) with Ki of 2.7 μM and 5.2 μM, respectively.	PI3K/Akt/mTOR	C20H31N3O2S2	Free Base	N/A	CCCCCCCCCCCCC1=CC=C(C=C1)S(=O)(=O)NC1=NN=CS1 |c:14,16,25,t:12,23|	6.296	4	1	14
S1557	KRN 633	416.86	286370-15-8	PDGFR,VEGFR	http://www.selleckchem.com/products/KRN-633.html	KRN 633 is an ATP-competitive inhibitor of VEGFR1/2/3 with IC50 of 170 nM/160 nM/125 nM, weakly inhibits PDGFR-α/β and c-Kit, does not block the phosphorylation of FGFR-1, EGFR or c-Met in cell.	Protein Tyrosine Kinase	C20H21ClN4O4	Free Base	N/A	CCCNC(=O)NC1=CC=C(OC2=NC=NC3=CC(OC)=C(OC)C=C23)C=C1Cl |c:14,28,t:7,9,12,16,20,24|	4.107	6	2	7
S1558	AT7867	337.85	857531-00-1	Akt,S6 Kinase	http://www.selleckchem.com/products/AT7867.html	AT7867 is a potent ATP-competitive inhibitor of Akt1/2/3 and p70S6K/PKA with IC50 of 32 nM/17 nM/47 nM and 85 nM/20 nM, respectively; little activity outside the AGC kinase family.	PI3K/Akt/mTOR	C20H20ClN3	Free Base	N/A	ClC1=CC=C(C=C1)C1(CCNCC1)C1=CC=C(C=C1)C1=CNN=C1 |c:3,5,17,19,25,t:1,15,22|	3.85	1	2	3
S1561	BMS-777607	512.89	1025720-94-8	TAM Receptor,c-Met	http://www.selleckchem.com/products/BMS-777607.html	BMS-777607 is a Met-related inhibitor for c-Met, Axl, Ron and Tyro3 with IC50 of 3.9 nM, 1.1 nM, 1.8 nM and 4.3 nM, 40-fold more selective for Met-related targets versus Lck, VEGFR-2, and TrkA/B, and more than 500-fold greater selectivity versus all other receptor and non receptor kinases. Phase 1/2.	Protein Tyrosine Kinase	C25H19ClF2N4O4	Free Base	N/A	CCOC1=C(C(=O)NC2=CC=C(OC3=CC=NC(N)=C3Cl)C(F)=C2)C(=O)N(C=C1)C1=CC=C(F)C=C1 |c:3,15,18,23,29,37,t:8,10,13,32,34|	3.517	5	2	7
S1565	VX-809 (Lumacaftor)	452.41	936727-05-8	CFTR	http://www.selleckchem.com/products/VX-809.html	VX-809 acts to correct CFTR mutations common in cystic fibrosis by increasing mutant CFTR (F508del-CFTR) maturation,EC50 of 0.1 μM. Phase 3.	Transmembrane Transporters	C24H18F2N2O5	Free Base	N/A	CC1=C(N=C(NC(=O)C2(CC2)C2=CC3=C(OC(F)(F)O3)C=C2)C=C1)C1=CC=CC(=C1)C(O)=O |c:22,25,30,32,t:1,3,12,14,28|	6.411	5	1	5
S1567	Pomalidomide	273.24	19171-19-8	TNF-alpha	http://www.selleckchem.com/products/Pomalidomide(CC-4047).html	Pomalidomide inhibits LPS-induced TNF-α release with IC50 of 13 nM.	Apoptosis	C13H11N3O4	Free Base	CC-4047	NC1=C2C(=O)N(C3CCC(=O)NC3=O)C(=O)C2=CC=C1 |c:1,18,20|	-0.65	4	2	1
S1568	PD318088	561.09	391210-00-7	MEK	http://www.selleckchem.com/products/PD318088.html	PD318088 is a non-ATP competitive allosteric MEK1/2 inhibitor, binds simultaneously with ATP in a region of the MEK1 active site that is adjacent to the ATP-binding site.	MAPK	C16H13BrF3IN2O4	Free Base	N/A	OCC(O)CONC(=O)C1=C(NC2=CC=C(I)C=C2F)C(F)=C(F)C(Br)=C1 |c:9,17,26,t:12,14,22|	3.327	2	4	7
S1569	Tazarotene	351.46	118292-40-3	Retinoid Receptor	http://www.selleckchem.com/products/Tazarotene(Avage).html	Tazarotene is a prescription topical retinoid sold as a cream or gel.	Others	C21H21NO2S	Free Base	Tazorac, Avage, Zora	CCOC(=O)C1=CN=C(C=C1)C#CC1=CC2=C(SCCC2(C)C)C=C1 |c:7,9,25,t:5,14,16|	4.951	3	0	5
S1570	KU-60019	547.67	925701-49-1	ATM/ATR	http://www.selleckchem.com/products/KU-60019.html	KU-60019 is an improved analogue of KU-55933, with IC50 of 6.3 nM for ATM, 270- and 1600-fold more selective for ATM than DNA-PK and ATR,and is a highly effective radiosensitizer.	DNA Damage	C30H33N3O5S	Free Base	N/A	C[C@H]1CN(CC(=O)NC2=CC3=C(SC4=C(C3)C=CC=C4C3=CC(=O)C=C(O3)N3CCOCC3)C=C2)C[C@@H](C)O1 |r,c:13,17,19,26,37,t:8,10,22|	3.818	5	1	5
S1572	BS-181 HCl	416.99	1397219-81-6	CDK	http://www.selleckchem.com/products/BS-181.html	BS-181 is a highly selective CDK7 inhibitor with IC50 of 21 nM. It is more than 40-fold selective for CDK7 than CDK1, 2, 4, 5, 6, or 9.	Cell Cycle	C22H33ClN6	Hydrochloride	N/A	Cl.CC(C)C1=C2N=C(NCCCCCCN)C=C(NCC3=CC=CC=C3)N2N=C1 |c:3,21,23,28,t:5,15,19|	4.684	2	3	11
S1573	Fasudil (HA-1077) HCl	327.83	105628-07-7	Autophagy,ROCK	http://www.selleckchem.com/products/Fasudil-HCl(HA-1077).html	Fasudil (HA-1077) is a potent inhibitor of ROCK-II, PKA, PKG, PKC, and MLCK with Ki of 0.33 μM, 1.6 μM, 1.6 μM, 3.3 μM and 36 μM, respectively.	Cell Cycle	C14H18ClN3O2S	Hydrochloride	AT-877	Cl.O=S(=O)(N1CCCNCC1)C1=C2C=CN=CC2=CC=C1 |c:11,13,15,18,20|	0.57	3	1	2
S1574	Doramapimod (BIRB 796)	527.66	285983-48-4	p38 MAPK	http://www.selleckchem.com/products/BIRB-796-(Doramapimod).html	BIRB 796 (Doramapimod) is a highly selective p38α MAPK inhibitor with Kd of 0.1 nM, 330-fold greater selectivity versus JNK2, weak inhibition for c-RAF, Fyn and Lck, insignificant inhibition of ERK-1, SYK, IKK2, ZAP-70, EGFR, HER2, PKA, PKC, PKCα/β/γ.	MAPK	C31H37N5O3	Free Base	N/A	CC1=CC=C(C=C1)N1N=C(C=C1NC(=O)NC1=CC=C(OCCN2CCOCC2)C2=C1C=CC=C2)C(C)(C)C |c:3,5,9,11,32,35,37,t:1,18,20|	5.907	4	2	8
S1575	RO4929097	469.4	847925-91-1	Beta Amyloid,Gamma-secretase	http://www.selleckchem.com/products/RO4929097.html	RO4929097 is a γ secretase inhibitor with IC50 of 4 nM, inhibiting cellular processing of Aβ40 and Notch with EC50 of 14 nM and 5 nM, respectively. Phase 2.	Proteases	C22H20F5N3O3	Free Base	RO-4929097	CC(C)(C(=O)NCC(F)(F)C(F)(F)F)C(=O)N[C@H]1C2=C(C=CC=C2)C2=C(NC1=O)C=CC=C2 |r,c:20,22,25,31,33,t:18|	3.184	3	3	6
S1576	Sulfasalazine	398.39	599-79-1	COX,NF-κB	http://www.selleckchem.com/products/Sulfasalazine(Azulfidine).html	Sulfasalazine is a sulfa agent and a derivative of mesalazine used primarily as an anti-inflammatory agent.	Others	C18H14N4O5S	Free Base	Azulfidine, Salazopyrin, Sulphasalazine	OC(=O)C1=C(O)C=CC(=C1)\N=N\C1=CC=C(C=C1)S(=O)(=O)NC1=CC=CC=N1 |c:3,6,8,15,17,26,28,t:13,24|	3.463	6	2	6
S1577	Tie2 kinase inhibitor	439.53	948557-43-5	Tie-2	http://www.selleckchem.com/products/Tie2-kinase-inhibitor.html	Tie2 kinase inhibitor is an optimized compound of SB-203580, selective to Tie2 with IC50 of 0.25 μM, 200-fold more potent than p38.	Protein Tyrosine Kinase	C26H21N3O2S	Free Base	N/A	COC1=CC2=C(C=C1)C=C(C=C2)C1=C(N=C(N1)C1=CC=C(C=C1)S(C)=O)C1=CC=NC=C1 |c:4,6,9,11,16,22,24,32,34,t:2,14,20,30|	4.57	4	1	5
S1578	Candesartan	440.45	139481-59-7	RAAS	http://www.selleckchem.com/products/Candesartan(Atacand).html	Candesartan is an angiotensin II receptor antagonist with IC50 of 0.26 nM.	Endocrinology & Hormones	C24H20N6O3	Free Base	Atacand, Blopress, Amias, Ratacand	CCOC1=NC2=C(N1CC1=CC=C(C=C1)C1=CC=CC=C1C1=NNN=N1)C(=CC=C2)C(O)=O |c:5,12,14,19,21,27,30,32,t:3,10,17,24|	4.626	6	1	7
S1582	H 89 2HCl	519.28	130964-39-5	PKA,S6 Kinase	http://www.selleckchem.com/products/H-89-dihydrochloride.html	H 89 2HCl is a potent PKA inhibitor with Ki of 48 nM, 10-fold selective for PKA than PKG, greater than 500-fold selectivity than PKC, MLCK, calmodulin kinase II and casein kinase I/II.	PI3K/Akt/mTOR	C20H22BrCl2N3O2S	Dihydrochloride	N/A	Cl.Cl.BrC1=CC=C(\C=C\CNCCNS(=O)(=O)C2=CC=CC3=C2C=CN=C3)C=C1 |c:17,19,22,24,27,t:1,3,15|	3.665	3	2	8
S1590	TWS119	318.33	601514-19-6	GSK-3	http://www.selleckchem.com/products/TWS119.html	TWS119 is a GSK-3β inhibitor with IC50 of 30 nM; capable of inducing neuronal differentiation and may be useful to stem cell biology.	PI3K/Akt/mTOR	C18H14N4O2	Free Base	N/A	NC1=CC(=CC=C1)C1=CC2=C(N1)N=CN=C2OC1=CC=CC(O)=C1 |c:3,5,10,14,16,22,25,t:1,8,20|	3.464	3	3	3
S1593	Apixaban	459.5	503612-47-3	Factor Xa	http://www.selleckchem.com/products/Apixaban(BMS-562247-01).html	Apixaban is a highly selective, reversible inhibitor of Factor Xa with Ki of 0.08 nM and 0.17 nM in human and rabbit, respectively.	Metabolism	C25H25N5O4	Free Base	N/A	COC1=CC=C(C=C1)N1N=C(C(N)=O)C2=C1C(=O)N(CC2)C1=CC=C(C=C1)N1CCCCC1=O |c:4,6,15,26,28,t:2,10,24|	2.865	5	1	5
S1594	Semagacestat (LY450139)	361.44	425386-60-3	Gamma-secretase	http://www.selleckchem.com/products/Semagacestat(LY450139).html	Semagacestat (LY450139) is a γ-secretase blocker for Aβ42, Aβ40 and Aβ38 with IC50 of 10.9 nM, 12.1 nM and 12.0 nM, also inhibits Notch signaling with IC50 of 14.1 nM. Phase 3.	Proteases	C19H27N3O4	Free Base	LY-450139, LY450139	CC(C)[C@H](O)C(=O)N[C@@H](C)C(=O)N[C@H]1C2=C(CCN(C)C1=O)C=CC=C2 |r,c:14,23,25|	0.632	3	3	5
S1601	Reserpine	608.68	50-55-5	Others	http://www.selleckchem.com/products/Reserpine.html	Reserpine is an indole alkaloid antipsychotic and antihypertensive drug that has been used for the control of high blood pressure and for the relief of psychotic symptoms.	Others	C33H40N2O9	Free Base	N/A	[H][C@]12C[C@@H](OC(=O)C3=CC(OC)=C(OC)C(OC)=C3)[C@H](OC)[C@@H](C(=O)OC)[C@@]1([H])C[C@@]1([H])N(CCC3=C1NC1=C3C=CC(OC)=C1)C2 |r,c:17,37,41,44,48,t:7,11|	4.242	9	1	10
S1603	Furosemide	330.74	54-31-9	Sodium Channel	http://www.selleckchem.com/products/Furosemide(Lasix).html	Furosemide(Lasix) is a loop diuretic used in the treatment of congestive heart failure and edema.	Others	C12H11ClN2O5S	Free Base	Lasix, Frusemide	NS(=O)(=O)C1=C(Cl)C=C(NCC2=CC=CO2)C(=C1)C(O)=O |c:4,13,17,t:7,11|	1.403	4	2	5
S1604	Olmesartan Medoxomil	558.59	144689-63-4	RAAS	http://www.selleckchem.com/products/olmesartan-medoxomil-Benicar.html	Olmesartan medoxomil is a compound which is hydrolyzed to olmesartan that is a selective AT1 subtype angiotensin II receptor antagonist.	Endocrinology & Hormones	C29H30N6O6	Free Base	Olmetec	CCCC1=NC(=C(N1CC1=CC=C(C=C1)C1=CC=CC=C1C1=NNN=N1)C(=O)OCC1=C(C)OC(=O)O1)C(C)(C)O |c:5,12,14,19,21,27,34,t:3,10,17,24|	4.814	9	1	11
S1605	Cefdinir	395.41	91832-40-5	Antifection	http://www.selleckchem.com/products/Cefdinir(Omnicef).html	Cefdinir(Omnicef) is a bacteriocidal antibiotic.	Others	C14H13N5O5S2	Free Base	FK-482, BMY-28488, PD 134393, CI-983	[H][C@]12SCC(C=C)=C(N1C(=O)[C@@]2([H])NC(=O)C(=N/O)\C1=CSC(N)=N1)C(O)=O |r,c:6,25,t:21|	-0.172	5	2	5
S1606	Clotrimazole	344.84	23593-75-1	Antifection	http://www.selleckchem.com/products/Clotrimazole(Canesten).html	Clotrimazole is a synthetic, antifungal and broad-spectrum derivate of imidazole.	Others	C22H17ClN2	Free Base	Lotrimin, Mycelex, Canesten	ClC1=C(C=CC=C1)C(N1C=CN=C1)(C1=CC=CC=C1)C1=CC=CC=C1 |c:3,5,10,12,17,19,24,26,t:1,15,22|	5.222	1	0	4
S1607	Rizatriptan Benzoate	391.47	145202-66-0	5-HT Receptor	http://www.selleckchem.com/products/Rizatriptan-Benzoate(Maxalt).html	Rizatriptan Benzoate is an agonist at serotonin <b>5-HT1B</b> and <b>5-HT1D</b> receptors, used to treat acute migraine attacks.	Neuronal Signaling	C22H25N5O2	Benzoate	MK-462, Maxalt	OC(=O)C1=CC=CC=C1.CN(C)CCC1=CNC2=C1C=C(CN1C=NC=N1)C=C2 |c:5,7,17,24,26,29,t:3,14,20|	0.492	3	1	6
S1608	Pyridostigmine Bromide	261.12	101-26-8	AChR	http://www.selleckchem.com/products/Pyridostigmine-Bromide(Mestinon).html	Pyridostigmine Bromide is a parasympathomimetic and a reversible cholinesterase inhibitor.	Neuronal Signaling	C9H13BrN2O2	Bromide	Mestinon, Regonol	[Br-].CN(C)C(=O)OC1=C[N+](C)=CC=C1 |c:9,11,t:6|	-1.014	2	0	2
S1609	Methimazole	114.17	60-56-0	Others	http://www.selleckchem.com/products/Methimazole(Tapazole).html	Methimazole(Tapazole, Northyx) is an antithyroid medicine.	Others	C4H6N2S	Free Base	Basolan, Metazolo, Thiamazole	CN1C=CNC1=S |c:2|	0.414	0	1	0
S1610	Metolazone	365.83	17560-51-9	Others	http://www.selleckchem.com/products/Metolazone(Zaroxolyn).html	Metolazone(Zaroxolyn) is primarily used to treat congestive heart failure and high blood pressure.	Others	C16H16ClN3O3S	Free Base	Mykrox, Zaroxolyn, Diulo	CC1NC2=CC(Cl)=C(C=C2C(=O)N1C1=CC=CC=C1C)S(N)(=O)=O |c:6,8,17,19,t:3,15|	2.463	3	2	2
S1611	Cefoperazone	645.67	62893-19-0	Antifection	http://www.selleckchem.com/products/cefoperazone-cefobid.html	Cefoperazone is a cephalosporin antibiotic for inhibition of rMrp2-mediated [3H]E217βG uptake with IC50 of 199 μM.	Others	C25H27N9O8S2	Free Base	N/A	[H][C@]12SCC(CSC3=NN=NN3C)=C(N1C(=O)[C@H]2NC(=O)[C@H](NC(=O)N1CCN(CC)C(=O)C1=O)C1=CC=C(O)C=C1)C(O)=O |r,c:9,13,44,t:7,39,41|	-0.792	9	3	9
S1613	Silodosin	495.53	160970-54-7	Adrenergic Receptor	http://www.selleckchem.com/products/Silodosin(Rapaflo).html	Silodosin(Rapaflo) is an α1-adrenoceptor antagonist with high uroselectivity.	Neuronal Signaling	C25H32F3N3O4	Free Base	N/A	C[C@H](CC1=CC2=C(N(CCCO)CC2)C(=C1)C(N)=O)NCCOC1=CC=CC=C1OCC(F)(F)F |r,c:15,27,29,t:3,5,25|	3.451	3	3	14
S1614	Riluzole	234.2	1744-22-5	GluR,Sodium Channel	http://www.selleckchem.com/products/Riluzole(Rilutek).html	Riluzole is a drug used to treat amyotrophic lateral sclerosis.	Transmembrane Transporters	C8H5F3N2OS	Free Base	PK-26124, RP-54274, Rilutek	NC1=NC2=C(S1)C=C(OC(F)(F)F)C=C2 |c:3,14,t:1,7|	3.828	2	1	2
S1615	Risperidone	410.48	106266-06-2	5-HT Receptor	http://www.selleckchem.com/products/Risperidone(Risperdal).html	Risperidone(Risperdal) is an atypical antipsychotic used to treat schizophrenia.	Neuronal Signaling	C23H27FN4O2	Free Base	R 64 766, Risperdal	CC1=C(CCN2CCC(CC2)C2=NOC3=C2C=CC(F)=C3)C(=O)N2CCCCC2=N1 |c:1,15,18,21,32,t:12|	3.317	4	0	4
S1617	Sulfapyridine	249.29	144-83-2	Antifection	http://selleckchem.com/products/Sulfapyridine(Dagenan).html	Sulfapyridine is a sulfonamide antibacterial.	Others	C11H11N3O2S	Free Base	Coccoclase, Eubasin, Eubasinum, Haptocil	NC1=CC=C(C=C1)S(=O)(=O)NC1=NC=CC=C1 |c:3,5,14,16,t:1,12|	0.959	3	2	3
S1618	Sulfameter	280.3	651-06-9	DHFR	http://www.selleckchem.com/products/Sulfameter(Bayrena).html	Sulfameter(Bayrena) is a long-acting sulfonamide antibacterial.	Others	C11H12N4O3S	Free Base	Sulfamethoxydiazine, Sulfametin, Sulfametorine, Sulfamethoxine, AHR-857, Berlicid	COC1=CN=C(NS(=O)(=O)C2=CC=C(N)C=C2)N=C1 |c:15,18,t:2,4,10,12|	0.297	5	2	4
S1619	Prilocaine	220.31	721-50-6	Sodium Channel	http://www.selleckchem.com/products/Prilocaine.html	Prilocaine is a local anesthetic of the amino amide type.	Others	C13H20N2O	Free Base	N/A	CCCNC(C)C(=O)NC1=C(C)C=CC=C1 |c:9,12,14|	2.263	1	2	5
S1620	Darunavir Ethanolate	593.73	635728-49-3	HIV Protease	http://www.selleckchem.com/products/Darunavir-Ethanolate(Prezista).html	Darunavir Ethanolate is an HIV protease inhibitor.	Proteases	C29H43N3O8S	Ethanolate	Prezista, TMC114	CCO.[H][C@@](O)(CN(CC(C)C)S(=O)(=O)C1=CC=C(N)C=C1)[C@]([H])(CC1=CC=CC=C1)NC(=O)O[C@@]1([H])CO[C@@]2([H])OCC[C@@]12[H] |r,c:19,27,29,t:14,16,25|	2.622	6	4	12
S1621	Theophylline	180.16	58-55-9	TGF-beta/Smad	http://selleckchem.com/products/Theophylline(Theo-Dur).html	Theophylline (Theo-Dur) is a methylxanthine agent and has bronchodilator properties and is used in the treatment of asthma and COAD.	TGF-beta/Smad	C7H8N4O2	Free Base		CN1C2=C(NC=N2)C(=O)N(C)C1=O |c:5,t:2|	-0.306	3	1	0
S1622	Prednisone	358.43	53-03-2	Glucocorticoid Receptor	http://www.selleckchem.com/products/Prednisone.html	Prednisone (Adasone) is a synthetic corticosteroid agent that is particularly effective as an immunosuppressant compound.	Others	C21H26O5	Free Base	Deltasone, Liquid Pred, Orasone, Adasone	[H][C@@]12CC[C@](O)(C(=O)CO)[C@@]1(C)CC(=O)[C@@]1([H])[C@@]2([H])CCC2=CC(=O)C=C[C@]12C |r,c:27,t:23|	1.217	3	1	2
S1623	Acetylcysteine	163.19	616-91-1	TNF-alpha,ROS	http://www.selleckchem.com/products/Acetylcysteine.html	Acetylcysteine is a pharmaceutical drug and nutritional supplement used primarily as a mucolytic agent and in the management of paracetamol (acetaminophen) overdose.	Others	C5H9NO3S	Free Base	N-acetylcysteine, N-acetyl-L-cysteine, NAC, A	[H][C@@](CS)(NC(C)=O)C(O)=O |r|	-0.578	2	1	3
S1624	Alendronate sodium trihydrate	326.13	121268-17-5	Others	http://selleckchem.com/products/Alendronate-Sodium(Fosamax).html	Alendronate, a nitrogen-containing bisphosphonate, is a potent inhibitor of bone resorption used for the treatment and prevention of osteoporosis.	Others	C4H19NNaO10P2	Sodium Salt	N/A	O.O.O.[Na].NCCCC(O)(P(O)(O)=O)P(O)(O)=O
S1625	Ethinyl Estradiol	296.4	57-63-6	Estrogen/progestogen Receptor	http://www.selleckchem.com/products/Ethinyl-Estradiol.html	Ethynyl estradiol is an orally bio-active estrogen used in almost all modern formulations of combined oral contraceptive pills.	Others	C20H24O2	Free Base	Ethynylestradiol	[H][C@@]12CC[C@@](O)(C#C)[C@@]1(C)CC[C@]1([H])C3=CC=C(O)C=C3CC[C@@]21[H] |r,c:20,t:15,17|	4.886	0	1	0
S1626	Naproxen Sodium	252.24	26159-34-2	COX	http://www.selleckchem.com/products/Naproxen-Sodium(Aleve).html	Naproxen is a COX inhibitor for COX-1 and COX-2 with IC50 of 8.7 μM and 5.2 μM, respectively.	Neuronal Signaling	C14H13NaO3	Sodium Salt	Anaprox, Naprelan	[Na+].COC1=CC=C2C=C(C=CC2=C1)[C@H](C)C([O-])=O |r,c:6,8,11,t:2,4|	1.375	1	0	3
S1627	Nitazoxanide	307.28	55981-09-4	Others	http://www.selleckchem.com/products/Nitazoxanide(Alinia).html	Nitazoxanide is a synthetic nitrothiazolyl-salicylamide derivative and an antiprotozoal agent. (IC50 for canine influenza virus ranges from 0.17 to 0.21 μM)	Others	C12H9N3O5S	Free Base	Daxon, Dexidex, Kidonax, Pacovanton, Paramix, Nitax, Zox, Nitazox, Toza	CC(=O)OC1=C(C=CC=C1)C(=O)NC1=NC=C(S1)[N+]([O-])=O |c:6,8,16,t:4,14|	1.398	4	1	5
S1628	Triamcinolone Acetonide	434.5	76-25-5	Glucocorticoid Receptor	http://www.selleckchem.com/products/Triamcinolone-Acetonide.html	Triamcinolone Acetonide is a more potent type of triamcinolone, being about 8 times as effective as prednisone.	Others	C24H31FO6	Free Base	Azmacort	[H][C@@]12C[C@H]3OC(C)(C)O[C@@]3(C(=O)CO)[C@@]1(C)C[C@H](O)[C@@]1(F)[C@@]2([H])CCC2=CC(=O)C=C[C@]12C |r,c:32,t:28|	1.157	4	2	2
S1629	Orlistat	495.73	96829-58-2	Lipase	http://www.selleckchem.com/products/Orlistat(Alli).html	Orlistat is a general lipase inhibitor with IC50 of 122 ng/ml for PL from human duodenal juice.	Others	C29H53NO5	Free Base	Tetrahydrolipstatin	CCCCCCCCCCC[C@@H](C[C@@H]1OC(=O)[C@H]1CCCCCC)OC(=O)[C@H](CC(C)C)NC=O |r|	8.333	5	1	23
S1630	Allopurinol	136.11	315-30-0	Others	http://www.selleckchem.com/products/Allopurinol(Zyloprim).html	Allopurinol (Zyloprim) is a xanthine oxidase inhibitor with an IC50 of 7.82±0.12 μM.	GPCR & G Protein	C5H4N4O	Free Base	Aloprim	O=C1N=CN=C2NNC=C12 |c:2,t:4,8|	-2.125	3	2	0
S1631	Allopurinol Sodium	159.1	17795-21-0	Others	http://www.selleckchem.com/products/Allopurinol-Sodium(Aloprim).html	Allopurinol Sodium is a xanthine oxidase inhibitor with an IC50 of 7.82±0.12 μM.	Others	C5H4N4NaO+	Sodium Salt	Lopurin, Zyloprim, Aloprim	[Na+].O=C1NC=NC2=C1C=NN2 |c:3,5,8|	-0.681	3	2	0
S1633	Zafirlukast	575.68	107753-78-6	LTR	http://www.selleckchem.com/products/Zafirlukast(Accolate).html	Zafirlukast is a leukotriene receptor antagonist (LTRA). (IC50=0.6μM, IC50=7.0 µM for CYP2C9)	Others	C31H33N3O6S	Free Base	Accolate, Accoleit, Vanticon	COC1=CC(=CC=C1CC1=CN(C)C2=C1C=C(NC(=O)OC1CCCC1)C=C2)C(=O)NS(=O)(=O)C1=CC=CC=C1C |c:4,6,14,29,40,42,t:2,10,17,38|	6.299	6	2	9
S1634	Acetaminophen	151.16	103-90-2,16958-94-4 (sodium salt)	COX	http://www.selleckchem.com/products/Acetaminophen(Tylenol).html	Acetaminophen is a COX inhibitor for COX-1 and COX-2 with IC50 of 113.7 μM and 25.8 μM, respectively.	Neuronal Signaling	C8H9NO2	Free Base	Paracetamol, Tylenol	[CH3:9][C:8](=[O:10])[NH:7][C:2]1=[CH:1][CH:6]=[C:5]([OH:11])[CH:4]=[CH:3]1	0.708	1	2	1
s1635	Erythromycin	733.93	114-07-8	Antifection	http://www.selleckchem.com/products/Erythromycin(E-Mycin).ht	Erythromycin is a macrolide antibiotic that has an antimicrobial spectrum similar to or slightly wider than that of penicillin (IC50=1.5 μg/ml).	Others	C37H67NO13	Free Base	E-Mycin	[H][C@]1(O[C@@H]2[C@@H](C)[C@H](O[C@H]3C[C@@](C)(OC)[C@@H](O)[C@H](C)O3)[C@@H](C)C(=O)O[C@H](CC)[C@@](C)(O)[C@H](O)[C@@H](C)C(=O)[C@H](C)C[C@@]2(C)O)O[C@H](C)C[C@@H]([C@H]1O)N(C)C |r|	1.792	8	3	7
S1636	Amphotericin B	924.08	1397-89-3	Antifection	http://www.selleckchem.com/products/Amphotericin-B(Abelcet).	Amphotericin B (AmB) is an amphipathic polyene antibiotic which permeabilizes ergosterol-containing membranes.	Others	C47H73NO17	Free Base	N/A	[H][C@]12C[C@@H](O[C@]3([H])O[C@H](C)[C@@H](O)[C@H](N)[C@@H]3O)\C=C\C=C\C=C\C=C\C=C\C=C\C=C\[C@H](C)[C@@H](O)[C@@H](C)[C@H](C)OC(=O)C[C@H](O)C[C@H](O)CC[C@@H](O)[C@H](O)C[C@H](O)C[C@](O)(C[C@H](O)[C@H]1C(O)=O)O2 |r,t:17,19,21,23,25,27,29|	-2.617	6	10	3
S1638	Ibuprofen	206.28	15687-27-1	COX	http://www.selleckchem.com/products/Ibuprofen(Advil).html	Ibuprofen (Dolgesic) is an anti-inflammatory inhibitor targeting COX-1 and COX-2 with IC50 of 13 μM and 370 μM, respectively.	Neuronal Signaling	C13H18O2	Free Base	Brufen, Nurofen, Motrin	CC(C)CC1=CC=C(C=C1)C(C)C(O)=O |c:6,8,t:4|	3.607	1	0	4
S1639	Amprenavir	505.63	161814-49-9	HIV Protease	http://www.selleckchem.com/products/Amprenavir-(Agenerase).html	Amprenavir is an HIV protease inhibitor with IC50 of 14.6 ng/mL in wild-type HIV isolates.	Proteases	C25H35N3O6S	Free Base	Agenerase	CC(C)CN(C[C@@H](O)[C@H](CC1=CC=CC=C1)NC(=O)O[C@H]1CCOC1)S(=O)(=O)C1=CC=C(N)C=C1 |r,c:12,14,35,t:10,30,32|	2.429	5	3	12
S1640	Albendazole	265.33	54965-21-8	Microtubule Associated	http://www.selleckchem.com/products/Albendazole(Albenza).html	Albendazole is a member of the benzimidazole compounds used as a drug indicated for the treatment of a variety of worm infestations.	Others	C12H15N3O2S	Free Base	Albenza, Eskazole, Zentel, Andazol	CCCSC1=CC=C2N=C(NC(=O)OC)NC2=C1 |c:17,t:4,6,8|	3.065	3	2	5
S1641	Chlorothiazide	295.72	58-94-6	Others	http://www.selleckchem.com/products/Chlorothiazide(Diuril).html	Chlorothiazide is a diuretic and antihypertensive. (IC50=3.8 mM)	Others	C7H6ClN3O4S2	Free Base	Diuril, Chlotride	NS(=O)(=O)C1=C(Cl)C=C2N=CNS(=O)(=O)C2=C1 |c:4,9,16,t:7|	-0.177	5	2	1
S1642	Methyldopa	211.21	555-30-6	5-HT Receptor,Adrenergic Receptor,Dopamine Receptor,Decarboxylase	http://selleckchem.com/products/Methyldopa(Aldomet).html	Methyldopa (Aldomet) is a DOPA decarboxylase competitive inhibitor with an ED50 of 21.8 mg/kg.	Neuronal Signaling	C10H13NO4	Free Base	Aldoril	C[C@](N)(CC1=CC(O)=C(O)C=C1)C(O)=O |r,c:10,t:4,7|
S1643	Ursodiol	392.57	128-13-2	Others	http://www.selleckchem.com/products/Ursodiol(Actigal).html	Ursodiol reduces cholesterol absorption and is used to dissolve (cholesterol) gallstones. (IC50=0.22 μM	Others	C24H40O4	Free Base	Ursodeoxycholic acid, UDCA, Ursosan, Ursofalk, Urso Forte, Udiliv	[H][C@@]1(CC[C@@]2([H])[C@]3([H])[C@@H](O)C[C@]4([H])C[C@H](O)CC[C@]4(C)[C@@]3([H])CC[C@]12C)[C@H](C)CCC(O)=O |r|	4.014	1	2	4
S1644	Nitrofural	198.14	59-87-0	Antifection	http://www.selleckchem.com/products/Nitrofurazone(ACTIN-N).html	Nitrofural is a topical anti-infective agent with an IC50 of 22.83 ± 1.2 μM. (Rat LD50 = 590 mg/kg)	Others	C6H6N4O4	Free Base	Nitrofural, Furacilin, ACTIN-N, Otofuran	NC(=O)N\N=C\C1=CC=C(O1)[N+]([O-])=O |c:8,t:6|	0.223	3	2	3
S1645	Ketoprofen	254.28	22071-15-4	COX	http://www.selleckchem.com/products/Ketoprofen(Actron).html	Ketoprofen (Actron) is a non-selective NSAID with IC50 of 0.5 μM and 2.33 μM for human recombinant COX-1 and COX-2, respectively.	Neuronal Signaling	C16H14O3	Free Base	Orudis, Oruvail	CC(C(O)=O)C1=CC(=CC=C1)C(=O)C1=CC=CC=C1 |c:7,9,16,18,t:5,14|	3.361	2	0	4
S1646	Ketorolac	376.4	74103-07-4	COX	http://www.selleckchem.com/products/Ketorolac-Tromethamine(Toradol).html	Ketorolac (Ketorolac tromethamine) is a non-selective COX inhibitor of COX-1 and COX-2 with IC50 of 1.23 μM and 3.50 μM, respectively.	Neuronal Signaling	C15H13NO3	Free Base	N/A	OC(=O)C1CCN2C1=CC=C2C(=O)C1=CC=CC=C1 |c:10,17,19,t:8,15|	2.832	2	0	3
S1647	Adenosine	267.24	58-61-7	Others	http://www.selleckchem.com/products/Adenosine(Adenocard).html	Adenosine is a nucleoside composed of a molecule of adenine attached to a ribose sugar molecule (ribofuranose) moiety via a β-N9-glycosidic bond.	Others	C10H13N5O4	Free Base	Adenocard	NC1=NC=NC2=C1N=CN2[C@@H]1O[C@H](CO)[C@@H](O)[C@H]1O |r,c:3,5,8,t:1|	-1.881	4	4	2
S1649	Zolmitriptan	287.36	139264-17-8	5-HT Receptor	http://www.selleckchem.com/products/Zolmitriptan(Zomig).html	Zolmitriptan(Zomig) is a selective serotonin receptor agonist.	Neuronal Signaling	C16H21N3O2	Free Base	Zomig, Zomigon, AscoTopand, Zomigoro	CN(C)CCC1=CNC2=C1C=C(C[C@H]1COC(=O)N1)C=C2 |r,c:8,21,t:5,11|	2.457	2	2	5
S1651	Telbivudine	242.23	3424-98-4	Reverse Transcriptase	http://www.selleckchem.com/products/Telbivudine(Sebivo).html	Telbivudine is an antiviral agent used in the treatment of hepatitis B infection.	Others	C10H14N2O5	Free Base	N/A	CC1=CN([C@@H]2C[C@@H](O)[C@H](CO)O2)C(=O)NC1=O |r,t:1|	-1.238	3	3	2
S1652	Monobenzone	200.23	103-16-2	Tyrosinase	http://www.selleckchem.com/products/Monobenzone(Benoquin).html	Monobenzone is a compound used as a topical agent for medical depigmentation.	Others	C13H12O2	Free Base	Benoquin	OC1=CC=C(OCC2=CC=CC=C2)C=C1 |c:9,11,14,t:1,3,7|	3.155	1	1	3
S1653	Tretinoin	300.4	302-79-4	Retinoid Receptor	http://www.selleckchem.com/products/Tretinoin(Aberela).html	All−trans Retinoic acid (ATRA), whith is a ligand for both the retinoic acid receptor (RAR) and the retinoid X receptor (RXR), can induce granulocytic differentiation and apoptosis in acute promyelocytic leukemia (APL) cells.	Others	C20H28O2	Free Base	Vesanoid, Airol, Renova, Atralin, Retin-A, Avita, Stieva-A, all-trans retinoic acid	CC(/C=C/C1=C(C)CCCC1(C)C)=C\C=C\C(C)=C\C(O)=O |c:4|	5.551	1	0	5
S1654	Phenylbutazone	308.37	50-33-9	COX	http://www.selleckchem.com/products/Phenylbutazone(Butazolidin).html	Phenylbutazone(Butazolidin, Butatron) is used as a non-steroidal anti-inflammatory agent for the treatment of chronic pain, including the symptoms of arthritis.	Others	C19H20N2O2	Free Base	Bute, Butazolidin, Butatron	CCCCC1C(=O)N(N(C1=O)C1=CC=CC=C1)C1=CC=CC=C1 |c:14,16,21,23,t:12,19|	3.954	2	0	5
S1655	Ezetimibe	409.4	163222-33-1	Others	http://www.selleckchem.com/products/Ezetimibe(Zetia).html	Ezetimibe (Zetia) is a compound that lowers cholesterol.	Others	C24H21F2NO3	Free Base	Zetia, Ezetrol	O[C@@H](CC[C@@H]1[C@H](N(C1=O)C1=CC=C(F)C=C1)C1=CC=C(O)C=C1)C1=CC=C(F)C=C1 |r,c:15,23,31,t:10,12,18,20,26,28|	4.633	1	2	6
S1657	Enalaprilat Dihydrate	348.4	84680-54-6	RAAS	http://www.selleckchem.com/products/Enalaprilat.html	Enalaprilat is an angiotensin-converting enzyme (ACE) inhibitor with IC50 of 1.94 nM.	Endocrinology & Hormones	C18H28N2O7	Dihydrate	N/A	O.O.C[C@H](N[C@@H](CCC1=CC=CC=C1)C(O)=O)C(=O)N1CCC[C@H]1C(O)=O |r,c:8,10,t:6|	-1.53	3	1	8
S1658	Dofetilide	441.56	115256-11-6	Potassium Channel	http://www.selleckchem.com/products/Dofetilide(Tikosyn).html	Dofetilide(Tikosyn) is a class III antiarrhythmic agent.	Others	C19H27N3O5S2	Free Base	Tikosyn, UK68798	CN(CCOC1=CC=C(NS(C)(=O)=O)C=C1)CCC1=CC=C(NS(C)(=O)=O)C=C1 |c:14,28,t:5,7,19,21|	1.679	5	2	11
S1662	Isradipine	371.39	75695-93-1	Calcium Channel	http://www.selleckchem.com/products/Isradipine(Dynacirc).html	Isradipine(Dynacirc) is a calcium channel blocker with an IC50 of 34±8 μM.	Transmembrane Transporters	C19H21N3O5	Free Base	DynaCirc, Prescal, PN-200-110, Clivoten, Esradin	COC(=O)C1=C(C)NC(C)=C(C1C1=CC=CC2=NON=C12)C(=O)OC(C)C |c:4,9,15,t:13,17,20|	2.168	7	1	6
S1665	Estrone	270.37	53-16-7	Estrogen/progestogen Receptor	http://www.selleckchem.com/products/Estrone.html	Estrone is an estrogenic hormone.	Endocrinology & Hormones	C18H22O2	Free Base	Oestrone	[H][C@@]12CCC(=O)[C@@]1(C)CC[C@]1([H])C3=CC=C(O)C=C3CC[C@@]21[H] |r,c:18,t:13,15|	3.938	1	1	0
S1666	Flucytosine	129.09	2022-85-7	Antifection	http://www.selleckchem.com/products/Flucytosine(Ancobon).html	Flucytosine (5-Fluorocytosine, 5-FC) is an antifungal drug with IC50 of 0.93 μM in C. albicans.	Others	C4H4FN3O	Free Base	5-fluorocytosine, Ancotil	NC1=NC(=O)NC=C1F |c:6,t:1|	-1.048	2	2	0
S1667	Trichlormethiazide	380.66	133-67-5	Others	http://www.selleckchem.com/products/Trichlormethiazide(Achletin).html	Trichlormethiazide(Achletin) is a diuretic with properties similar to those of hydrochlorothiazide.	Others	C8H8Cl3N3O4S2	Free Base	Achletin, Diu-Hydrin, Triflumen	NS(=O)(=O)C1=C(Cl)C=C2NC(NS(=O)(=O)C2=C1)C(Cl)Cl |c:4,16,t:7|	1.046	4	3	2
S1669	Loteprednol etabonate	466.95	82034-46-6	Glucocorticoid Receptor	http://www.selleckchem.com/products/Loteprednol-etabonate.html	Loteprednol etabonate is a potent <b>glucocorticoid receptor</b> agonist, used in treatment of inflammation of the eye due to allergies.	Endocrinology & Hormones	C24H31ClO7	Free Base	Alrex, Lotemax	[H][C@@]12CC[C@](OC(=O)OCC)(C(=O)OCCl)[C@@]1(C)C[C@H](O)[C@@]1([H])[C@@]2([H])CCC2=CC(=O)C=C[C@]12C |r,c:33,t:29|	3.865	6	1	7
S1671	（6-）ε-​Aminocaproic acid	131.17	60-32-2	Others	http://www.selleckchem.com/products/Aminocaproic-acid(Amicar).html	（6-）ε-​Aminocaproic acid is a derivative and analogue of the amino acid lysine.	Others	C6H13NO2	Free Base	Amicar, ε-amino caproic acid, ε-Ahx, 6-aminohexanoic acid	NCCCCCC(O)=O	-2.164	1	1	5
S1672	Aminoglutethimide	232.28	125-84-8	Aromatase	http://www.selleckchem.com/products/Aminoglutethimide(Cytadren).html	Aminoglutethimide is an aromatase inhibitor with IC50 of 10 μM.	Endocrinology & Hormones	C13H16N2O2	Free Base	N/A	CCC1(CCC(=O)NC1=O)C1=CC=C(N)C=C1 |c:16,t:11,13|	1.285	2	2	2
S1673	Aminophylline	420.43	317-34-0	PDE	http://www.selleckchem.com/products/Aminophylline(Truphylline).html	Aminophylline is a competitive nonselective phosphodiesterase inhibitor with an IC50 of 0.12 mM and also a nonselective adenosine receptor antagonist.	Metabolism	C16H24N10O4	Ethylenediamine	Somopphyllin, Aminocadol, Phyllocontin	NCCN.CN1C2=C(NC=N2)C(=O)N(C)C1=O.CN1C2=C(NC=N2)C(=O)N(C)C1=O |c:8,22,t:5,19|	-2.089	6	4	1
S1676	Amorolfine HCl	353.97	78613-38-4	Antifection	http://www.selleckchem.com/products/Amorolfine-Hydrochloride.html	Amorolfine hydrochloride is a antifungal reagent.	Others	C21H36ClNO	Hydrochloride	Amorolfin, Curanail, Loceryl, Locetar, Odenil	Cl.CCC(C)(C)C1=CC=C(CC(C)CN2C[C@H](C)O[C@H](C)C2)C=C1 |r,c:22,t:5,7|	5.681	1	0	6
S1677	Chloramphenicol	323.13	56-75-7	Antifection	http://www.selleckchem.com/products/Chloramphenicol(Chloromycetin).html	Chloramphenicol is a bacteriostatic antimicrobial.	Others	C11H12Cl2N2O5	Free Base	Alficetyn, Chlornitromycin, Chloromycetin	OC[C@@H](NC(=O)C(Cl)Cl)[C@H](O)C1=CC=C(C=C1)[N+]([O-])=O |r,c:13,15,t:11|	1.025	1	3	6
S1679	Flurbiprofen	244.26	51543-39-6	COX	http://www.selleckchem.com/products/Flurbiprofen(Ansaid).html	Flurbiprofen is a member of the phenylalkanoic acid derivative family of non-steroidal anti-inflammatory drugs (NSAIDs).	Others	C15H13FO2	Free Base	Urbifen, Ansaid, Flurwood, Froben	C[C@H](C(O)=O)C1=CC(F)=C(C=C1)C1=CC=CC=C1 |r,c:8,10,15,17,t:5,13|	3.68	1	0	3
S1680	Disulfiram	296.54	97-77-8	Dehydrogenase	http://www.selleckchem.com/products/Disulfiram(Antabuse).html	Disulfiram is an agent used to support the treatment of chronic alcoholism by producing an acute sensitivity to alcohol.	Others	C10H20N2S4	Free Base	Antabuse, Antabus	CCN(CC)C(=S)SSC(=S)N(CC)CC	5.6	0	0	9
S1681	Mesalamine	153.14	89-57-6	IκB/IKK	http://www.selleckchem.com/products/Mesalamine(Lialda).html	Mesalamine is an anti-inflammatory compound.	Others	C7H7NO3	Free Base	Apriso, 5-aminosalicylic acid, Mesalazine, Asacol, Pentasa, Canasa	NC1=CC=C(O)C(=C1)C(O)=O |c:6,t:1,3|	0.471	1	2	1
S1683	Ipratropium Bromide	412.37	22254-24-6	AChR	http://www.selleckchem.com/products/Ipratropium-bromide.html	Ipratropium bromide is a muscarinic antagonist, bronchodilator, N-Isopropyl salt of atropine.	Others	C20H30BrNO3	Bromide	Atrovent, Apovent, Aerovent	[Br-].CC(C)[N+]1(C)C2CCC1C[C@H](C2)OC(=O)C(CO)C1=CC=CC=C1 |r,c:22,24,t:20|	-1.326	2	1	6
S1685	Sulfanilamide	172.2	63-74-1	Antifection	http://www.selleckchem.com/products/Sulfanilamide.html	Sulfanilamide (Sulphanilamide) is a competitive inhibitor for bacterial enzyme dihydropteroate synthetase with IC50 of 320 μM.	Others	C6H8N2O2S	Free Base	N/A	NC1=CC=C(C=C1)S(N)(=O)=O |c:3,5,t:1|	-0.212	2	2	1
S1688	Betamethasone Dipropionate	504.59	5593-20-4	Glucocorticoid Receptor	http://www.selleckchem.com/products/Betamethasone-Dipropionate(Diprolene).html	Betamethasone Dipropionate is a glucocorticoid steroid with anti-inflammatory and immunosuppressive abilities.	Endocrinology & Hormones	C28H37FO7	Free Base	Diprospan, Diprolene, Diprosone, Diprolene AF	[H][C@@]12C[C@H](C)[C@](OC(=O)CC)(C(=O)COC(=O)CC)[C@@]1(C)C[C@H](O)[C@@]1(F)[C@@]2([H])CCC2=CC(=O)C=C[C@]12C |r,c:36,t:32|	3.8	6	1	8
S1689	Meprednisone	372.455	1247-42-3	Glucocorticoid Receptor	http://www.selleckchem.com/products/Betapar(Meprednisone).html	Meprednisone is a glucocorticoid and a methylated derivative of prednisone.	Others	C22H28O5	Free Base	Betanisona	[H][C@@]12C[C@H](C)[C@](O)(C(=O)CO)[C@@]1(C)CC(=O)[C@@]1([H])[C@@]2([H])CCC2=CC(=O)C=C[C@]12C |r,c:28,t:24|	1.536	3	1	2
S1690	Betamethasone Valerate	476.58	2152-44-5	Glucocorticoid Receptor	http://www.selleckchem.com/products/Betamethasone-valerate(Betnovate).html	Betamethasone Valerate is a moderately potent glucocorticoid steroid with anti-inflammatory and immunosuppressive properties.	Endocrinology & Hormones	C27H37FO6	Free Base	Betnovate, Celestone, Betaderm, Luxiq	[H][C@@]12C[C@H](C)[C@](OC(=O)CCCC)(C(=O)CO)[C@@]1(C)C[C@H](O)[C@@]1(F)[C@@]2([H])CCC2=CC(=O)C=C[C@]12C |r,c:34,t:30|	3.666	4	2	7
S1691	Praziquantel	312.41	55268-74-1	Antifection	http://www.selleckchem.com/products/Praziquantel(Biltricide).html	Praziquantel is an anthelmintic effective against flatworms.	Others	C19H24N2O2	Free Base	Droncit	O=C(C1CCCCC1)N1CC2N(CCC3=CC=CC=C23)C(=O)C1 |c:17,t:15,19|	2.477	2	0	1
S1692	Busulfan	246.3	55-98-1	DNA alkylator	http://www.selleckchem.com/products/Busulfan(Busulfex).html	Busulfan(Myleran, Busulfex) is a cell cycle non-specific alkylating antineoplastic agent.	Others	C6H14O6S2	Free Base	Myleran, Busulfex	CS(=O)(=O)OCCCCOS(C)(=O)=O	-0.289	2	0	7
S1693	Carbamazepine	236.27	298-46-4	Autophagy,Sodium Channel	http://www.selleckchem.com/products/Carbamazepine(Carbatrol).html	Carbamazepine (Carbatrol) is a sodium channel blocker with IC50 of 131 μM in rat brain synaptosomes.	Transmembrane Transporters	C15H12N2O	Free Base	Equetro, Tegretol, Biston	NC(=O)N1C2=C(C=CC=C2)C=CC2=C1C=CC=C2 |c:6,8,11,13,16,18,t:4|	2.679	1	1	0
S1696	Hydrocortisone	362.46	50-23-7	Glucocorticoid Receptor	http://www.selleckchem.com/products/Hydrocortisone.html	Hydrocortisone is a steroid hormone or glucocorticoid produced by the adrenal gland.	Others	C21H30O5	Free Base	Cortisol	[H][C@@]12CC[C@](O)(C(=O)CO)[C@@]1(C)C[C@H](O)[C@@]1([H])[C@@]2([H])CCC2=CC(=O)CC[C@]12C |r,t:23|	1.283	2	2	2
S1698	Torsemide	348.42	56211-40-6	Others	http://selleckchem.com/products/Torsemide(Demadex).html	Torsemide is a pyridyl sulfonylurea with a chemical structure between that of traditional loop diuretics and Cl- channel blockers, used to treat hypertension.	Others	C16H20N4O3S	Free Base	Demadex	CC(C)NC(=O)NS(=O)(=O)C1=C(NC2=CC(C)=CC=C2)C=CN=C1 |c:10,16,18,21,23,t:13|
S1701	Desonide	416.51	638-94-8	Glucocorticoid Receptor	http://www.selleckchem.com/products/Desonide.html	Desonide is a low potency topical corticosteroid.	Others	C24H32O6	Free Base	Locapred, Topifug, Tridesilon	[H][C@@]12C[C@@]3([H])[C@]4([H])CCC5=CC(=O)C=C[C@]5(C)[C@@]4([H])[C@@H](O)C[C@]3(C)[C@@]1(OC(C)(C)O2)C(=O)CO |r,c:13,t:9|	1.028	4	2	2
S1702	Didanosine	236.23	69655-05-6	Reverse Transcriptase	http://www.selleckchem.com/products/Didanosine(Videx).html	Didanosine(Videx, Videx EC) is a reverse transcriptase inhibitor with an IC50 of 0.49 μM.	Microbiology	C10H12N4O3	Free Base	Videx EC	OC[C@@H]1CC[C@@H](O1)N1C=NC2=C1N=CNC2=O |r,c:9,11,14|	-0.844	4	2	2
S1703	Divalproex Sodium	310.41	76584-70-8	HDAC	http://www.selleckchem.com/products/Divalproex-sodium.html	Divalproex sodium consists of a compound of sodium valproate and valproic acid in a 1:1 molar relationship in an enteric coated form.	Ubiquitin	C16H31NaO4	Sodium Salt	Depakote, Epival	[Na+].CCCC(CCC)C(O)=O.CCCC(CCC)C([O-])=O	4.025	1	0	10
S1704	Emtricitabine	247.25	143491-57-0	Reverse Transcriptase	http://www.selleckchem.com/products/Emtricitabine.html	Emtricitabine (Emtriva) is a nucleoside reverse transcriptase inhibitor with an IC50 of 27.7 μM.	Microbiology	C8H10FN3O3S	Free Base	Atripla	NC1=NC(=O)N(C=C1F)[C@@H]1CS[C@H](CO)O1 |r,c:6,t:1|	-0.68	3	2	2
S1705	Progesterone	314.46	57-83-0	Estrogen/progestogen Receptor	http://www.selleckchem.com/products/Progesterone(Prometrium).html	Progesterone is a C-21 steroid hormone.	Others	C21H30O2	Free Base	Prometrium, Agolutin, Corlutin	[H][C@@]12CC[C@H](C(C)=O)[C@@]1(C)CC[C@@]1([H])[C@@]2([H])CCC2=CC(=O)CC[C@]12C |r,t:20|	3.86	2	0	1
S1706	Lamivudine	229.26	134678-17-4	Reverse Transcriptase	http://www.selleckchem.com/products/Lamivudine(Epivir).html	Lamivudine(Epivir) is a potent nucleoside analog reverse transcriptase inhibitor with an IC50 of 2.7 mM.	Microbiology	C8H11N3O3S	Free Base	3TC, Zeffix, Heptovir, Epivir, Epivir-HBV	NC1=NC(=O)N(C=C1)[C@@H]1CS[C@H](CO)O1 |r,c:6,t:1|	-0.59	3	2	2
S1707	Eplerenone	414.49	107724-20-9	Glucocorticoid Receptor	http://selleckchem.com/products/Eplerenone(Inspra).html	Eplerenone is a mineralocorticoid receptor antagonist, and blocks the action of aldosterone, used to control high blood pressure.	Others	C24H30O6	Free Base	Inspra	[H][C@@]12CC[C@@]3(CCC(=O)O3)[C@@]1(C)C[C@H]1O[C@@]11[C@@]2([H])[C@@H](CC2=CC(=O)CC[C@]12C)C(=O)OC |r,t:24|
S1708	Hydrochlorothiazide	297.74	58-93-5	Others	http://www.selleckchem.com/products/Hydrochlorothiazide.html	Hydrochlorothiazide is a first line diuretic compound of the thiazide class.	Others	C7H8ClN3O4S2	Free Base	Aquazide H,Carozide,Diaqua,Esidrix,Ezide,HydroPar,HydroDIURIL,Hydrocot,Hydrokraft,Loqua,Oretic	NS(=O)(=O)C1=C(Cl)C=C2NCNS(=O)(=O)C2=C1 |c:4,16,t:7|	-0.28	4	3	1
S1709	Estradiol	272.38	50-28-2	Estrogen/progestogen Receptor	http://www.selleckchem.com/products/Estradiol.html	Estradiol is the predominant sex hormone.	Others	C18H24O2	Free Base	17β-estradiol, oestradiol, 17β-Oestradiol, β-Estradiol	[H][C@@]12CC[C@H](O)[C@@]1(C)CC[C@]1([H])C3=C(CC[C@@]21[H])C=C(O)C=C3 |r,c:13,24,t:21|	3.838	0	2	0
S1712	Deferasirox	373.36	201530-41-8	P450 (e.g. CYP17)	http://www.selleckchem.com/products/Deferasirox(Exjade).html	Deferasirox(Exjade) is a rationally-designed oral iron chelator.	Others	C21H15N3O4	Free Base	Exjade, ICL-670, ICL-670A, CGP-72670	OC(=O)C1=CC=C(C=C1)N1N=C(N=C1C1=CC=CC=C1O)C1=CC=CC=C1O |c:5,7,11,13,18,20,26,28,t:3,16,24|	4.063	3	2	4
S1713	Piroxicam	331.35	36322-90-4	COX	http://www.selleckchem.com/products/Piroxicam(Feldene).html	Piroxicam (Feldene) is a non-selective COX inhibitor with an IC50 of 6 mM.	Neuronal Signaling	C15H13N3O4S	Free Base	Roxam	CN1C(C(=O)NC2=NC=CC=C2)=C(O)C2=C(C=CC=C2)S1(=O)=O |c:8,10,17,19,t:6,12,15|	0.501	4	2	2
S1714	Gemcitabine	263.2	95058-81-4	Autophagy,DNA/RNA Synthesis	http://www.selleckchem.com/products/Gemcitabine(Gemzar).html	Gemcitabine(Gemzar) belongs to the group of medicines called antimetabolites.Phase 3.	DNA Damage	C9H11F2N3O4	Free Base	Gemzar	NC1=NC(=O)N(C=C1)[C@@H]1O[C@H](CO)[C@@H](O)C1(F)F |r,c:6,t:1|	-1.394	3	3	2
S1715	Glipizide	445.54	29094-61-9	Others	http://www.selleckchem.com/products/Glipizide(Glucotrol).html	Glipizide(Glucotrol) is used to treat high blood sugar levels caused by a type of diabetes mellitus called type 2 diabetes.	Others	C21H27N5O4S	Free Base	Glucotrol XL	CC1=NC=C(N=C1)C(=O)NCCC1=CC=C(C=C1)S(=O)(=O)NC(=O)NC1CCCCC1 |c:3,5,15,17,t:1,13|	1.902	6	3	7
S1716	Glyburide (Glibenclamide)	494	10238-21-8	Potassium Channel	http://www.selleckchem.com/products/Glyburide(Diabeta).html	Glyburide (Diabeta) is an anti-diabetic compound in a class of medications known as sulfonylureas, closely related to sulfa agents.	Others	C23H28ClN3O5S	Free Base	Glibenclamide, Glycron, Glynase, Micronase, Daonil, Semi-Daonil, Euglucon, Delmide	COC1=C(C=C(Cl)C=C1)C(=O)NCCC1=CC=C(C=C1)S(=O)(=O)NC(=O)NC1CCCCC1 |c:7,17,19,t:2,4,15|	4.14	5	3	8
S1717	Fomepizole	82.1	7554-65-6	Dehydrogenase	http://selleckchem.com/products/Fomepizole(Antizol).html	Fomepizole is a competitive inhibitor of alcohol dehydrogenase, the enzyme that catalyzes the initial steps in the metabolism of ethylene glycol and methanol to their toxic metabolites.	Angiogenesis	C4H6N2	Free Base	4-methylpyrazole, Antizol, Antizol-Vet	CC1=CNN=C1 |c:4,t:1|	0.76	1	1	0
S1718	Adefovir Dipivoxil	501.47	142340-99-6	Reverse Transcriptase	http://www.selleckchem.com/products/Adefovir-Dipivoxil(Preveon).html	Adefovir Dipivoxil(Preveon, Hepsera) works by blocking reverse transcriptase, an enzyme that is crucial for the hepatitis B virus (HBV) to reproduce in the body.	Microbiology	C20H32N5O8P	Free Base	Bis-POM PMEA, Preveon, Hepsera	CC(C)(C)C(=O)OCOP(=O)(COCCN1C=NC2=C1N=CN=C2N)OCOC(=O)C(C)(C)C |c:16,18,21,23|	1.666	10	1	15
S1719	Zalcitabine	211.22	7481-89-2	Reverse Transcriptase	http://www.selleckchem.com/products/Zalcitabine.html	Zalcitabine is a nucleoside analog HIV reverse transcriptase inhibitor (NARTI).	Microbiology	C9H13N3O3	Free Base	Hivid, Dideoxycytidine	NC1=NC(=O)N(C=C1)[C@H]1CC[C@@H](CO)O1 |r,c:6,t:1|	-0.991	3	2	2
S1721	Azathioprine	277.26	446-86-6	Rho	http://www.selleckchem.com/products/Azathioprine(Azasan).html	Azathioprine(Azasan, Imuran) is a drug that suppresses the immune system and is used in organ transplantation and autoimmune disease.	Others	C9H7N7O2S	Free Base	Azasan, Imuran, Azamun, BW-57-322, NSC-39084	CN1C=NC(=C1SC1=C2NC=NC2=NC=N1)[N+]([O-])=O |c:2,4,8,11,14,16|	1.071	4	1	3
S1723	Indomethacin	357.79	53-86-1	COX	http://www.selleckchem.com/products/Indomethacin(Indocid).html	Indomethacin(Indocid, Indocin) is a non-steroidal anti-inflammatory compound commonly used to reduce fever, pain, stiffness, and swelling.	Others	C19H16ClNO4	Free Base	Indomethacin, Indochron E-R, Indocin-SR, Indocid, Indocin	COC1=CC=C2N(C(=O)C3=CC=C(Cl)C=C3)C(C)=C(CC(O)=O)C2=C1 |c:14,25,t:2,4,9,11,18|	4.235	3	0	4
S1724	Paliperidone	426.48	144598-75-4	Dopamine Receptor	http://selleckchem.com/products/Paliperidone(Invega).html	Paliperidone, the main active metabolite of Risperidone, is a potent serotonin-2A and dopamine-2 receptor antagonist, used in the treatment of schizophrenia.	Neuronal Signaling	C23H27FN4O3	Free Base	N/A	CC1=C(CCN2CCC(CC2)C2=NOC3=C2C=CC(F)=C3)C(=O)N2CCCC(O)C2=N1 |c:1,15,18,21,33,t:12|
S1725	Terbinafine	291.43	91161-71-6	Antifection	http://www.selleckchem.com/products/Terbinafine(Lamisil).html	Terbinafine(Lamisil, Terbinex) is used to treat infections caused by a fungus. It works by killing the fungus or preventing its growth.	Others	C21H25N	Free Base	Lamisil, Terbinex, Corbinal, Zabel	CN(C\C=C\C#CC(C)(C)C)CC1=CC=CC2=CC=CC=C12 |c:14,18,t:12,16,20|	5.335	0	0	6
S1727	Levonorgestrel	312.45	797-63-7	Estrogen/progestogen Receptor	http://www.selleckchem.com/products/Levonorgestrel(Levonelle).html	Levonorgestrel(Levonelle) is a synthetic progestogen used as an active ingredient in some hormonal contraceptives.	Others	C21H28O2	Free Base	Levonelle, D-Norgestrel, Levonova	[H][C@@]12CC[C@@](O)(C#C)[C@@]1(CC)CC[C@]1([H])[C@@]3([H])CCC(=O)C=C3CC[C@@]21[H] |r,c:22|	4.771	1	0	1
S1729	Gemfibrozil	250.33	25812-30-0	PPAR	http://www.selleckchem.com/products/Gemfibrozil(Lopid).html	Gemfibrozil (Lopid) is a compound used to lower lipid levels.	Others	C15H22O3	Free Base	Gemcor, Lopid, Jezil, Gen-Fibro	CC1=CC(OCCCC(C)(C)C(O)=O)=C(C)C=C1 |c:16,t:1,13|	4.172	2	0	6
S1730	Indapamide	365.83	26807-65-8	Others	http://www.selleckchem.com/products/Indapamide(Lozol).html	Indapamide(Lozol) is a non-thiazide sulphonamide diuretic compound, generally used in the treatment of hypertension, as well as decompensated cardiac failure.	Others	C16H16ClN3O3S	Free Base	Arifon, Fludex, Noranat, Veroxil, Tertensif	CC1CC2=C(C=CC=C2)N1NC(=O)C1=CC=C(Cl)C(=C1)S(N)(=O)=O |c:5,7,20,t:3,15,17|	2.664	3	2	3
S1732	Mitotane	320.04	53-19-0	Others	http://www.selleckchem.com/products/Mitotane(Lysodren).html	Mitotane(Lysodren), is an antineoplastic medication used in the treatment of adrenocortical carcinoma.	Others	C14H10Cl4	Free Base	Lysodren, Mitotan	ClC(Cl)C(C1=CC=C(Cl)C=C1)C1=C(Cl)C=CC=C1 |c:9,12,15,17,t:4,6|	5.745	0	0	3
S1733	Methylprednisolone	374.47	83-43-2	Glucocorticoid Receptor	http://www.selleckchem.com/products/Methylprednisolone.html	Methylprednisolone is a synthetic corticosteroid with anti-inflammatory and immunomodulating properties.	Others	C22H30O5	Free Base	Medrol, Solu-Medrol, Medrone	[H][C@@]12CC[C@](O)(C(=O)CO)[C@@]1(C)C[C@H](O)[C@@]1([H])[C@@]2([H])C[C@H](C)C2=CC(=O)C=C[C@]12C |r,c:28,t:24|	1.512	2	2	2
S1734	Meloxicam	351.4	71125-38-7	COX	http://www.selleckchem.com/products/Meloxicam(Mobic).html	Meloxicam (Mobic) is a nonsteroidal anti-inflammatory agent with analgesic and fever reducer effects.	Others	C14H13N3O4S2	Free Base	Metacam, Parocin	CN1C(C(=O)NC2=NC=C(C)S2)=C(O)C2=C(C=CC=C2)S1(=O)=O |c:17,19,t:6,8,12,15|	0.255	4	2	2
S1735	Mesna	164.18	19767-45-4	Others	http://www.selleckchem.com/products/Mesna(Uromitexan).html	Mesna(Uromitexan, Mesnex), a sulfhydryl compound that is used to reduce the incidence of hemorrhagic cystitis associated with certain chemotherapeutic agents.	Others	C2H5NaO3S2	Sodium Salt	Uromitexan, Mesnex	[Na+].[O-]S(=O)(=O)CCS	-2.227	0	0	2
S1736	Methocarbamol	241.24	532-03-6	Carbonic Anhydrase	http://www.selleckchem.com/products/Methocarbamol(Robaxin).html	Methocarbamol(Robaxin) is a central muscle relaxant used to treat skeletal muscle spasms.	Others	C11H15NO5	Free Base	Robaxin	COC1=C(OCC(O)COC(N)=O)C=CC=C1 |c:2,13,15|	0.916	4	2	7
S1737	Prednisolone	360.44	50-24-8	Glucocorticoid Receptor	http://www.selleckchem.com/products/Prednisolone(Hydroretrocortine).html	Prednisolone(Hydroretrocortine) is a synthetic glucocorticoid with anti-inflammatory and immunomodulating properties.	Others	C21H28O5	Free Base	Decaprednil, Predonine	[H][C@@]12CC[C@](O)(C(=O)CO)[C@@]1(C)C[C@H](O)[C@@]1([H])[C@@]2([H])CCC2=CC(=O)C=C[C@]12C |r,c:27,t:23|	1.26	2	2	2
S1738	Telmisartan	514.62	144701-48-4	RAAS	http://www.selleckchem.com/products/Telmisartan(Micardis).html	Telmisartan (Micardis) is an angiotensin II receptor antagonist (ARB) used in the management of hypertension.	Endocrinology & Hormones	C33H30N4O2	Free Base	Targit	CCCC1=NC2=C(C=C(C=C2C)C2=NC3=C(C=CC=C3)N2C)N1CC1=CC=C(C=C1)C1=CC=CC=C1C(O)=O |c:7,9,17,19,30,32,37,39,t:3,5,13,15,28,35|	7.799	3	0	7
S1739	Thiabendazole	201.25	148-79-8	P450 (e.g. CYP17)	http://www.selleckchem.com/products/Thiabendazole.html	Thiabendazole inhibites the mitochondrial helminth-specific enzyme, fumarate reductase, with anthelminthic property.	Others	C10H7N3S	Free Base	Mintezol, Equizole	N1C2=C(C=CC=C2)N=C1C1=CSC=N1 |c:3,5,8,14,t:1,11|	2.154	2	1	1
S1740	Guaifenesin	198.22	93-14-1	Others	http://www.selleckchem.com/products/Guaifenesin(Guaiphenesin).html	Guaifenesin(Guaiphenesin) is thought to act as an expectorant.	Others	C10H14O4	Free Base	Guaiphenesin, Glyceryl guaiacolate	COC1=C(OCC(O)CO)C=CC=C1 |c:2,10,12|	0.747	2	2	5
S1741	Rifabutin	847	72559-06-9	Antifection	http://www.selleckchem.com/products/Rifabutin(Mycobutin).html	Rifabutin(Mycobutin) is a semisynthetic ansamycin antibiotic with potent antimycobacterial properties.	Others	C46H62N4O11	Free Base	Mycobutin, Ansamycin, LM 427, Ansatipine	CO[C@H]1\C=C\O[C@@]2(C)OC3=C(C2=O)C2=C(C(=O)C(NC(=O)\C(C)=C\C=C\[C@H](C)[C@H](O)[C@@H](C)[C@@H](O)[C@@H](C)[C@H](OC(C)=O)[C@@H]1C)=C1NC4(CCN(CC(C)C)CC4)N=C21)C(O)=C3C |r,c:9,t:3,14,23,25,44,58|	3.931	9	5	5
S1742	Nevirapine	266.3	129618-40-2	Reverse Transcriptase	http://www.selleckchem.com/products/Nevirapine(Viramune).html	Nevirapine(Viramune) is a non-nucleoside reverse transcriptase inhibitor (NNRTI) used to treat HIV-1 infection and AIDS.	Microbiology	C15H14N4O	Free Base	Viramune, BI-RG 587	CC1=CC=NC2=C1NC(=O)C1=C(N=CC=C1)N2C1CC1 |c:3,5,13,15,t:1,11|	2.293	3	1	1
S1743	NEXIUM (esomeprazole magnesium)	713.12	161973-10-0	Proton Pump	http://www.selleckchem.com/products/Esomeprazole-magnesium(Nexium).html	Esomeprazole Magnesium is a <b>proton pump</b> inhibitor to reduce gastric acid secretion.	Transmembrane Transporters	C34H36MgN6O6S2	Magnesium salt	N/A	[Mg++].COC1=CC2=C([N-]C(=N2)[S@@](=O)CC2=NC=C(C)C(OC)=C2C)C=C1.COC1=CC2=C([N-]C(=N2)[S@@](=O)CC2=C(C)C(OC)=C(C)C=N2)C=C1	6.1	10	0	10
S1744	Nicotinic Acid	123.11	59-67-6	Vitamin	http://www.selleckchem.com/products/Niacin(Nicotinic-acid).html	Nicotinic Acid is a water-soluble vitamin belonging to the vitamin B family.	Others	C6H5NO2	Free Base	Vitamin B3, Niacinamide, Nicotinic acid	OC(=O)C1=CC=CN=C1 |c:5,7,t:3|	0.309	2	0	1
S1747	Nimodipine	418.44	66085-59-4	Autophagy,Calcium Channel	http://www.selleckchem.com/products/Nimodipine(Nimotop).html	Nimodipine(Nimotop) is a dihydropyridine derivative and an analogue of the calcium channel blocker nifedipine, with antihypertensive activity.Nimodipine decreases intracellular free Ca2+,Beclin-1 and autophagy.	Transmembrane Transporters	C21H26N2O7	Free Base	Nimotop	COCCOC(=O)C1=C(C)NC(C)=C(C1C1=CC=CC(=C1)[N+]([O-])=O)C(=O)OC(C)C |c:7,12,18,20,t:16|	2.361	5	1	10
S1748	Nisoldipine	388.41	63675-72-9	Calcium Channel	http://www.selleckchem.com/products/Nisoldipine(Sular).html	Nisoldipine (Sular) is a calcium channel blocker belonging to the dihydropyridines class, specific for L-type Cav1.2 with IC50 of 10 nM.	Others	C20H24N2O6	Free Base	Zadipina	COC(=O)C1=C(C)NC(C)=C(C1C1=CC=CC=C1[N+]([O-])=O)C(=O)OCC(C)C |c:4,9,15,17,t:13|	2.958	4	1	8
S1754	Oxybutynin	357.49	5633-20-5	AChR	http://www.selleckchem.com/products/Oxybutynin(Ditropan).html	Oxybutynin is a competitive antagonist of the M1, M2, and M3 subtypes of the <b>muscarinic acetylcholine receptor</b>, used to relieve urinary and bladder difficulties.	Neuronal Signaling	C22H31NO3	Free Base	Ditropan, Lyrinel XL, Oxytrol	CCN(CC)CC#CCOC(=O)C(O)(C1CCCCC1)C1=CC=CC=C1 |c:23,25,t:21|	4.646	2	0	10
S1756	Enoxacin	320.32	74011-58-8	Topoisomerase	http://www.selleckchem.com/products/Enoxacin(Penetrex).html	Enoxacin(Penetrex)is an oral broad-spectrum fluoroquinolone antibacterial agent used in the treatment of urinary tract infections and gonorrhea. Insomnia is a common adverse effect.	Others	C15H17FN4O3	Free Base	Almitil, Bactidan, Bactidron, Comprecin, Enoksetin, Enoxen, Enroxil, Enoxin, Enoxor, Flumark, Gyrami	CCN1C=C(C(O)=O)C(=O)C2=CC(F)=C(N=C12)N1CCNCC1 |c:13,t:3,10,15|	-1.483	3	1	3
S1759	Pitavastatin Calcium	880.98	147526-32-7	HMG-CoA Reductase	http://www.selleckchem.com/products/Pitavastatin-calcium(Livalo).html	Pitavastatin calcium is a novel member of the medication class of statins.	Others	C50H46CaF2N2O8	Calcium salt	Livalo	[Ca++].O[C@H](C[C@H](O)C=CC1=C(C2=CC=C(F)C=C2)C2=CC=CC=C2N=C1C1CC1)CC([O-])=O.O[C@H](C[C@H](O)C=CC1=C(C2=CC=C(F)C=C2)C2=CC=CC=C2N=C1C1CC1)CC([O-])=O |r,c:7,14,19,21,24,41,48,53,55,58,t:9,11,17,43,45,51|	4.96	2	4	16
S1760	Rifapentine	877.03	61379-65-5	DNA/RNA Synthesis	http://www.selleckchem.com/products/Rifapentine(Priftin).html	Rifapentine (Priftin) is an antibiotic compound used in the treatment of tuberculosis.	Others	C47H64N4O12	Free Base	Cyclopentylrifampicin	CO[C@H]1\C=C\O[C@@]2(C)OC3=C(C2=O)C2=C(O)C(\C=N\N4CCN(CC4)C4CCCC4)=C(NC(=O)C(C)=C\C=C\[C@H](C)[C@H](O)[C@@H](C)[C@@H](O)[C@@H](C)[C@H](OC(C)=O)[C@@H]1C)C(O)=C2C(O)=C3C |r,c:9,14,t:3,32,40|	4.664	8	6	6
S1761	Suprofen	260.31	40828-46-4	COX	http://www.selleckchem.com/products/Suprofen(Profenal).html	Suprofen(Profenal) is an NSAID.	Others	C14H12O3S	Free Base	Profenal, Topalgic, Suprol	CC(C(O)=O)C1=CC=C(C=C1)C(=O)C1=CC=CS1 |c:7,9,16,t:5,14|	3.314	2	0	4
S1762	Pyrazinamide	123.11	98-96-4	Antifection	http://www.selleckchem.com/products/Pyrazinamide(Pyrazinoic-acid-amide).html	Pyrazinamide is an agent used to treat tuberculosis.	Others	C5H5N3O	Free Base	Pezetamid, Pyrafat, Zinamide, Tebrazid, Pyrafat	NC(=O)C1=NC=CN=C1 |c:5,7,t:3|	-1.041	3	1	1
S1763	Quetiapine Fumarate	883.09	111974-72-2	Dopamine Receptor	http://www.selleckchem.com/products/Quetiapine-fumarate(Seroquel).html	Quetiapine fumarate(Seroquel) is an atypical antipsychotic used in the treatment of schizophrenia, bipolar I mania, bipolar II depression, bipolar I depression.	Neuronal Signaling	C46H54N6O8S2	Fumarate	ICI-204636, ZD 5077, ZM 204636, Seroquel XR	OC(=O)\C=C\C(O)=O.OCCOCCN1CCN(CC1)C1=NC2=CC=CC=C2SC2=C1C=CC=C2.OCCOCCN1CCN(CC1)C1=NC2=CC=CC=C2SC2=C1C=CC=C2 |c:24,26,30,33,35,54,56,60,63,65,t:20,22,50,52|	-0.718	6	2	14
S1764	Rifampin	822.94	13292-46-1	DNA/RNA Synthesis	http://www.selleckchem.com/products/Rifampin(Rifadin).html	Rifampin is a bactericidal antibiotic agent of the rifamycin group.	Others	C43H58N4O12	Free Base	Rifampicin	CO[C@H]1\C=C\O[C@@]2(C)OC3=C(C2=O)C2=C(O)C(\C=N\N4CCN(C)CC4)=C(NC(=O)C(C)=C\C=C\[C@H](C)[C@H](O)[C@@H](C)[C@@H](O)[C@@H](C)[C@H](OC(C)=O)[C@@H]1C)C(O)=C2C(O)=C3C |r,c:9,14,t:3,27,35|	3.262	8	6	5
S1768	Cefditoren Pivoxil	620.72	117467-28-4	Antifection	http://www.selleckchem.com/products/Cefditoren-pivoxil.html	Cefditoren pivoxil is used to treat uncomplicated skin and skin structure infections, etc.	Others	C25H28N6O7S3	Free Base	Spectracef , Meiact	[H][C@]12SCC(\C=C/C3=C(C)N=CS3)=C(N1C(=O)[C@H]2NC(=O)C(=N/OC)\C1=CSC(N)=N1)C(=O)OCOC(=O)C(C)(C)C |r,c:7,10,13,32,t:28|	1.926	10	2	12
S1770	Sulfadiazine	250.28	68-35-9	Antifection	http://www.selleckchem.com/products/Sulfadiazine.html	Sulfadiazine is a sulfonamide antibiotic.	Others	C10H10N4O2S	Free Base	Adiazin, Adiazine, Debenal, Liquadiazine	NC1=CC=C(C=C1)S(=O)(=O)NC1=NC=CC=N1 |c:3,5,14,16,t:1,12|	0.313	4	2	3
S1771	Chlorprothixene	315.86	113-59-7	Dopamine Receptor	http://www.selleckchem.com/products/Chlorprothixene.html	Chlorprothixene has strong binding affinities to dopamine and histamine receptors, such as D1, D2, D3, D5, H1, 5-HT2, 5-HT6 and 5-HT7, with Ki of 18 nM, 2.96 nM, 4.56 nM, 9 nM, 3.75 nM, 9.4 nM, 3 nM and 5.6 nM, respectively.	Neuronal Signaling	C18H18ClNS	Free Base	Cloxan, Taractan, Truxal	CN(C)CC\C=C1\C2=CC=CC=C2SC2=C1C=C(Cl)C=C2 |c:9,11,15,21,t:7,18|	5.123	0	0	3
S1773	Oxytetracycline (Terramycin)	460.43	79-57-2	Antifection	http://www.selleckchem.com/products/Oxytetracycline(Terramycin).html	Oxytetracycline(Terramycin) was the second of the broad-spectrum tetracycline group of antibiotics to be discovered.	Others	C22H24N2O9	Free Base	Terramycin, Liquamycin	[H][C@@]12[C@@H](O)[C@@]3([H])C(C(=O)[C@]1(O)C(=O)C(C(N)=O)=C(O)[C@H]2N(C)C)=C(O)C1=C(C=CC=C1O)[C@@]3(C)O |r,c:29,31,t:17,24,27|	-1.904	3	5	2
S1776	Toremifene Citrate	598.08	89778-27-8	Estrogen/progestogen Receptor	www.selleckchem.com/products/Toremifene-Citrate(Fareston).html	Toremifene Citrate is an oral selective estrogen receptor modulator (SERM) which helps oppose the actions of estrogen in the body.	Endocrinology & Hormones	C32H36ClNO8	Citrate	Fareston, Acapodene	OC(=O)CC(O)(CC(O)=O)C(O)=O.CN(C)CCOC1=CC=C(C=C1)C(=C(\CCCl)C1=CC=CC=C1)\C1=CC=CC=C1 |c:20,22,32,34,39,41,t:18,30,37|	1.945	4	0	14
S1777	Ethionamide	166.24	536-33-4	Antifection	http://www.selleckchem.com/products/Ethionamide.html	Ethionamide(2-ethylthioisonicotinamide) is an antibiotic used in the treatment of tuberculosis.	Others	C8H10N2S	Free Base	2-ethylthioisonicotinamide, Trecator SC, Amidazine	CCC1=NC=CC(=C1)C(N)=S |c:4,6,t:2|	1.498	1	1	2
S1778	Trifluridine	296.2	70-00-8	DNA/RNA Synthesis	http://www.selleckchem.com/products/Trifluridine(Viroptic).html	Trifluridine (Viroptic) is an anti-herpesvirus antiviral agent used primarily on the eye.	Others	C10H11F3N2O5	Free Base	Viroptic, Trifluorothymidine	OC[C@H]1O[C@H](C[C@@H]1O)N1C=C(C(=O)NC1=O)C(F)(F)F |r,c:10|	-0.782	3	3	3
S1782	Azacitidine	244.2	320-67-2	DNA Methyltransferase	http://www.selleckchem.com/products/Azacitidine(Vidaza).html	Azacitidine is a nucleoside analogue of cytidine that specifically inhibits DNA methylation by trapping DNA methyltransferases.	DNA Damage	C8H12N4O5	Free Base	5-azacytidine, Mylosar, Ladakamycin	NC1=NC(=O)N(C=N1)[C@@H]1O[C@H](CO)[C@@H](O)[C@H]1O |r,c:6,t:1|	-2.505	4	4	2
S1784	Vidarabine	267.24	5536-17-4	DNA/RNA Synthesis	http://www.selleckchem.com/products/Vidarabine(Vira-A).html	Vidarabine(Vira-A) is an antiviral drug which is active against herpes simplex and varicella zoster viruses.	Others	C10H13N5O4	Free Base	Vira-A	NC1=C2N=CN([C@@H]3O[C@H](CO)[C@@H](O)[C@@H]3O)C2=NC=N1 |r,c:1,3,17,19|	-1.881	4	4	2
S1787	Teniposide	656.65	29767-20-2	Topoisomerase	http://www.selleckchem.com/products/Teniposide(Vumon).html	Teniposide(Vumon)is a chemotherapeutic medication mainly used in the treatment of childhood acute lymphocytic leukemia (ALL).	Others	C32H32O13S	Free Base	Vumon, VM-26, Vehem, NSC 122819	[H][C@@]12[C@H](COC1=O)[C@H](O[C@@H]1O[C@@H]3CO[C@H](O[C@H]3[C@H](O)[C@H]1O)C1=CC=CS1)C1=CC3=C(OCO3)C=C1[C@H]2C1=CC(OC)=C(O)C(OC)=C1 |r,c:26,38,52,t:24,30,32,43,47|	2.516	10	3	6
S1788	Stanozolol	328.49	10418-03-8	Others	http://selleckchem.com/products/Stanozolol(Winstrol).html	Stanozolol(Winstrol, Winstrol Depot) is a synthetic anabolic steroid derived from testosterone.	Others	C21H32N2O	Free Base		[H][C@@]12CC[C@](C)(O)[C@@]1(C)CC[C@@]1([H])[C@@]2([H])CC[C@@]2([H])CC3=C(C[C@]12C)C=NN3 |r,c:22,29|	3.849	1	1	0
S1789	Tetrabenazine (Xenazine)	317.42	58-46-8	Dopamine Receptor	http://selleckchem.com/products/Tetrabenazine(Nitoman).html	Tetrabenazine (Nitoman, Xenazine) is a compound for the symptomatic treatment of hyperkinetic movement disorder.	PI3K/Akt/mTOR	C19H27NO3	Free Base	N/A	COC1=CC2=C(C=C1OC)C1CC(=O)C(CC(C)C)CN1CC2 |c:4,6,t:2|	3.365	3	0	4
S1790	Rifaximin	785.88	80621-81-4	DNA/RNA Synthesis	http://www.selleckchem.com/products/Rifaximin(Xifaxan).html	Rifaximin(Xifaxan), an orally administered, semi-synthetic, nonsystemic antibiotic derived from rifamycin SV with antibacterial activity.	Others	C43H51N3O11	Free Base	Rifacol, Fatroximin	CO[C@H]1\C=C\O[C@@]2(C)OC3=C(C2=O)C2=C(C(O)=C3C)C(O)=C(NC(=O)\C(C)=C/C=C/[C@H](C)[C@H](O)[C@@H](C)[C@@H](O)[C@@H](C)[C@H](OC(C)=O)[C@@H]1C)C1=C2N=C2C=C(C)C=CN12 |r,c:9,14,17,28,50,58,t:3,22,30,53,55|	4.805	8	5	3
S1792	Simvastatin	418.57	79902-63-9	HMG-CoA Reductase	http://www.selleckchem.com/products/Simvastatin(Zocor).html	Simvastatin is a competitive inhibitor of HMG-CoA reductase with Ki of 0.1-0.2 nM .	Others	C25H38O5	Free Base	Simlup, Simcard, Simvacor, Simvoget, Zorced	[H][C@@]1(CC[C@H]2[C@@H](C)C=CC3=C[C@H](C)C[C@H](OC(=O)C(C)(C)CC)[C@]23[H])C[C@@H](O)CC(=O)O1 |r,c:7,t:9|	4.634	4	1	7
S1793	Ramipril	416.51	87333-19-5	RAAS	http://www.selleckchem.com/products/Ramipril(Altace).html	Ramipril is an angiotensin-converting enzyme (ACE) inhibitor with IC50 of 5 nM.	Endocrinology & Hormones	C23H32N2O5	Free Base	Tritace	CCOC(=O)[C@H](CCC1=CC=CC=C1)N[C@@H](C)C(=O)N1[C@H]2CCC[C@H]2C[C@H]1C(O)=O |r,c:10,12,t:8|	0.308	4	1	10
S1794	Fenofibrate	360.83	49562-28-9	PPAR	http://www.selleckchem.com/products/Fenofibrate(Tricor).html	Fenofibrate (Tricor, Trilipix) is a compound of the fibrate class and fibric acid derivative.	Others	C20H21ClO4	Free Base	Antara, Fenoglide, Fibricor, Lipofen, Lofibra, Triglide	CC(C)OC(=O)C(C)(C)OC1=CC=C(C=C1)C(=O)C1=CC=C(Cl)C=C1 |c:12,14,24,t:10,19,21|	5.111	4	0	7
S1799	Ranolazine	427.54	95635-55-5	Calcium Channel	http://www.selleckchem.com/products/Ranolazine(Ranexa).html	Ranolazine(Ranexa) is an antianginal medication.	Others	C24H33N3O4	Free Base	Ranexa	COC1=CC=CC=C1OCC(O)CN1CCN(CC(=O)NC2=C(C)C=CC=C2C)CC1 |c:4,6,22,25,27,t:2|	2.991	3	2	9
S1801	Ranitidine Hydrochloride	350.86	66357-59-3	Histamine Receptor	http://www.selleckchem.com/products/Ranitidine-hydrochloride(Zantac).html	Ranitidine is a histamine H2-receptor antagonist with IC50 of 3.3 ± 1.4 μM.	Neuronal Signaling	C13H23ClN4O3S	Hydrochloride	Azantac	Cl.CN\C(NCCSCC1=CC=C(CN(C)C)O1)=C/[N+]([O-])=O |t:8,10|	1.421	1	2	10
S1802	AICAR (Acadesine)	258.23	2627-69-2	AMPK	http://www.selleckchem.com/products/Acadesine.html	Acadesine results in accumulation of ZMP, which mimics the stimulating effect of AMP on AMPK and AMPK kinase. Phase 3.	PI3K/Akt/mTOR	C9H14N4O5	Free Base	AICAR, AICA-riboside	NC(=O)C1=C(N)N(C=N1)[C@@H]1O[C@H](CO)[C@@H](O)[C@H]1O |r,c:3,7|	-2.913	3	5	3
S1805	Acetylcholine Chloride	181.66	60-31-1	AChR	http://www.selleckchem.com/products/Acetylcholine-chloride.html	The chemical compound acetylcholine (ACh) is a neurotransmitter in both the peripheral nervous system (PNS) and central nervous system (CNS) in many organisms including humans.	Neuronal Signaling	C7H16ClNO2	Chloride	N/A	[Cl-].CC(=O)OCC[N+](C)(C)C	-3.869	2	0	4
S1806	Acipimox	154.12	51037-30-0	Others	http://www.selleckchem.com/products/Acipimox.html	Acipimox is a niacin derivative used as a hypolipidemic agent.	Others	C6H6N2O3	Free Base	K-9321, Olbemox, Olbetam	CC1=CN=C(C=[N+]1[O-])C(O)=O |c:3,5,t:1|	-0.975	2	0	1
S1807	Aciclovir	225.2	59277-89-3	Antifection	http://www.selleckchem.com/products/Acyclovir(Aciclovir).html	Acyclovir is a synthetic nucleoside analogue active against herpesviruses.	Others	C8H11N5O3	Free Base	Aciclovir, Acycloguanosine, Zovirax	NC1=NC2=C(N=CN2COCCO)C(=O)N1 |c:5,t:1,3|	-1.423	4	3	4
S1808	Nifedipine	346.33	21829-25-4	Calcium Channel	http://www.selleckchem.com/products/Nifedipine(Adalat).html	Nifedipine(Adalat), a potent vasodilator agent with calcium antagonistic action.	Others	C17H18N2O6	Free Base	Anifed, Afeditab CR, Nifediac, Nifedical, Procardia	COC(=O)C1=C(C)NC(C)=C(C1C1=C(C=CC=C1)[N+]([O-])=O)C(=O)OC |c:4,9,15,17,t:13|	1.766	4	1	6
S1811	Amiloride HCl	266.09	2016-88-8	Sodium Channel,Calcium Channel	http://www.selleckchem.com/products/Amiloride-hydrochloride(Midamor).html	Amiloride hydrochloride(Midamor), a pyrazine compound inhibiting sodium reabsorption through sodium channels in renal epithelial cells.	Others	C6H9Cl2N7O	Hydrochloride	Midamor, Colectril, Amipramizide, Guanamprazine hydrochloride	Cl.NC(=N)NC(=O)C1=NC(Cl)=C(N)N=C1N |c:12,t:6,9|	-0.366	3	4	2
S1813	Amlodipine Besylate	567.05	111470-99-6	Calcium Channel	selleckchem.com/products/Amlodipine-besylate(Norvasc).html	Amlodipine (Norvasc) is a long-acting calcium channel blocker with an IC50 of 1.9 nM.	Transmembrane Transporters	C26H31ClN2O8S	Besylate	Istin	OS(=O)(=O)C1=CC=CC=C1.CCOC(=O)C1=C(COCCN)NC(C)=C(C1C1=C(Cl)C=CC=C1)C(=O)OC |c:6,8,15,24,28,31,33,t:4|	2.739	5	2	11
S1816	Chlorpheniramine Maleate	390.86	113-92-8	Histamine Receptor	http://www.selleckchem.com/products/Chlorpheniramine-maleate.html	Chlorpheniramine (Chlorpheniramine maleate, Chlorphenamine) is an histamine H1 receptor antagonist with IC50 of 12 nM.	Neuronal Signaling	C20H23ClN2O4	Maleate	Piriton	OC(=O)\C=C/C(O)=O.CN(C)CCC(C1=CC=C(Cl)C=C1)C1=NC=CC=C1 |c:18,23,25,t:13,15,21|	0.7	3	0	7
S1823	Fenoprofen Calcium	522.6	34597-40-5	Immunology & Inflammation related	http://www.selleckchem.com/products/fenoprofen-calcium.html	Fenoprofen calcium is a nonsteroidal, anti-inflammatory antiarthritic agent.	Others	C30H26CaO6	Calcium salt	Nalfon	[Ca++].CC(C([O-])=O)C1=CC(OC2=CC=CC=C2)=CC=C1.CC(C([O-])=O)C1=CC(OC2=CC=CC=C2)=CC=C1 |c:11,13,15,17,30,32,34,36,t:5,9,24,28|	4.086	2	0	8
S1825	Erdosteine	249.31	84611-23-4	Others	http://www.selleckchem.com/products/erdosteine.html	Erdosteine is a mucolytic which is used in treatment of excessive viscous mucus.	Others	C8H11NO4S2	Free Base	N/A	OC(=O)CSCC(=O)NC1CCSC1=O	-0.382	3	1	5
S1827	Betaxolol HCl	343.89	63659-19-8	Adrenergic Receptor	http://www.selleckchem.com/products/betaxolol-hydrochloride-betoptic.html	Betaxolol is a β1 adrenergic receptor blocker with IC50 of 6 μM.	Neuronal Signaling	C18H30ClNO3	Hydrochloride	Lokren ,Kerlone	Cl.CC(C)NCC(O)COC1=CC=C(CCOCC2CC2)C=C1 |c:21,t:9,11|	2.959	2	2	11
S1828	Proparacaine HCl	330.85	5875-06-9	Sodium Channel	http://www.selleckchem.com/products/proparacaine-hcl.html	Proparacaine HCl is a voltage-gated sodium channels antagonist with ED50 of 3.4 mM.	Transmembrane Transporters	C16H27ClN2O3	Hydrochloride	N/A	Cl.CCCOC1=C(N)C=C(C=C1)C(=O)OCCN(CC)CC |c:4,7,9|	3.013	3	1	10
S1829	Pranlukast	481.5	103177-37-3	Immunology & Inflammation related	http://www.selleckchem.com/products/pranlukast.html	Pranlukast is a selective cysteinyl leukotriene receptor antagonist.	Others	C27H23N5O4	Free Base	N/A	O=C(NC1=CC2=C(C=C1)C(=O)C=C(O2)C1=NN=NN1)C1=CC=C(OCCCCC2=CC=CC=C2)C=C1 |c:5,7,12,18,33,35,38,t:3,16,22,24,31|	4.232	7	2	9
S1830	Oxfendazole	315.35	53716-50-0	Antifection	http://www.selleckchem.com/products/oxfendazole.html	Oxfendazole is the sulfoxide form of fenbendazole which is a broad spectrum benzimidazole anthelmintic.	Others	C15H13N3O3S	Free Base	N/A	COC(=O)NC1=NC2=C(N1)C=C(C=C2)S(=O)C1=CC=CC=C1 |c:7,11,13,20,22,t:5,18|	2.657	4	2	4
S1831	Carvedilol	406.47	72956-09-3	Adrenergic Receptor	http://www.selleckchem.com/products/carvedilol.html	Carvedilol is a non-selective beta blocker/alpha-1 blocker with an IC50 of 3.8 μM for inhibition of LDL oxidation.	Neuronal Signaling	C24H26N2O4	Free Base	Coreg, Dilatrend	COC1=CC=CC=C1OCCNCC(O)COC1=C2C(NC3=C2C=CC=C3)=CC=C1 |c:4,6,22,25,27,29,31,t:2,18|	4.014	3	3	10
S1832	Atracurium Besylate	1243.48	64228-81-5	AChR	http://www.selleckchem.com/products/atracurium-besylate.html	Atracurium Besylate is a neuromuscular blocking agent with ED95 of 0.2 mg/kg.	Others	C65H82N2O18S2	Dibesylate	N/A	[O-]S(=O)(=O)C1=CC=CC=C1.[O-]S(=O)(=O)C1=CC=CC=C1.COC1=CC=C(CC2C3=CC(OC)=C(OC)C=C3CC[N+]2(C)CCC(=O)OCCCCCOC(=O)CC[N+]2(C)CCC3=CC(OC)=C(OC)C=C3C2CC2=CC=C(OC)C(OC)=C2)C=C1OC |c:6,8,16,18,36,71,85,88,t:4,14,22,24,28,32,63,67,77,79|	3.646	12	0	28
S1833	Butoconazole nitrate	474.79	64872-77-1	Antifection	http://www.selleckchem.com/products/butoconazole-nitrate.html	Butoconazole nitrate is an anti-fungal agent for IL-2, TNFα, IFN and GM-CSF with IC50 of 7.2 μg/mL, 14.4 μg/mL, 7.36 μg/mL and 7.6 μg/mL, respectively.	Others	C19H18Cl3N3O3S	Nitrate	N/A	O[N+]([O-])=O.ClC1=CC=C(CCC(CN2C=CN=C2)SC2=C(Cl)C=CC=C2Cl)C=C1 |c:13,15,19,22,24,28,t:4,6|	5.238	1	0	7
s1835	Azithromycin	748.98	83905-01-5	Autophagy	http://www.selleckchem.com/products/azithromycin-zithromax.h	Azithromycin is an antibiotic for inhibition of parasite growth with IC50 of 8.4 μM.	Ubiquitin	C38H72N2O12	Free Base	CP-62993, XZ-450	[H][C@@]1(C[C@@](C)(OC)[C@@H](O)[C@H](C)O1)O[C@H]1[C@H](C)[C@@H](O[C@@]2([H])O[C@H](C)C[C@@H]([C@H]2O)N(C)C)C(C)(O)C[C@@H](C)CN(C)[C@H](C)[C@@H](O)[C@](C)(O)[C@@H](CC)OC(=O)[C@@H]1C |r|	2.078	7	3	7
S1836	Albendazole Oxide	281.33	54029-12-8	Microtubule Associated	http://www.selleckchem.com/products/albendazole-oxide-ricobendazole.html	Albendazole Oxide is a tubulin polymerization or assembly inhibitor.	Others	C12H15N3O3S	Free Base	N/A	CCCS(=O)C1=CC2=C(C=C1)N=C(NC(=O)OC)N2 |c:7,9,t:5,12|	1.953	4	2	5
S1837	Flubendazole	313.28	31430-15-6	Autophagy	http://selleckchem.com/products/flubendazole-flutelmium.html	Flubendazole is an autophagy inducer by targeting Atg4B, used to treat internal parasite and worm infection.	Autophagy	C16H12FN3O3	Free Base	N/A	COC(=O)NC1=NC2=C(N1)C=C(C=C2)C(=O)C1=CC=C(F)C=C1 |c:7,11,13,23,t:5,18,20|	3.26	4	2	4
S1839	Chloroxine	214.05	773-76-2	Antifection	http://www.selleckchem.com/products/Chloroxine.html	Chloroxine is a synthetic antibacterial compound that is effective in the treatment of dandruff and seborrheic dermatitis when incorporated in a shampoo.	Others	C9H5Cl2NO	Free Base	Capitrol	OC1=C(Cl)C=C(Cl)C2=C1N=CC=C2 |c:1,7,10,12,t:4|	3.103	1	1	0
S1840	Lomustine	233.7	13010-47-4	DNA/RNA Synthesis	http://www.selleckchem.com/products/Lomustine(CeeNU).html	Lomustine inhibits cancer cells by damaging the DNA and stops cells from dividing.	Others	C9H16ClN3O2	Free Base	CCNU	ClCCN(N=O)C(=O)NC1CCCCC1	2.394	2	1	4
S1843	Chenodeoxycholic Acid	392.57	474-25-9	FXR	http://www.selleckchem.com/products/Chenodeoxycholic-acid.html	Chenodeoxycholic acid is a naturally occurring human bile acid.	Others	C24H40O4	Free Base	Chenodiol, Chenodesoxycholic acid, Chenocholic acid	[H][C@@]1(CC[C@@]2([H])[C@]3([H])[C@H](O)C[C@]4([H])C[C@H](O)CC[C@]4(C)[C@@]3([H])CC[C@]12C)[C@H](C)CCC(O)=O |r|	4.014	1	2	4
S1845	Cimetidine	252.34	51481-61-9	Histamine Receptor	http://www.selleckchem.com/products/Cimetidine(Tagamet).html	Cimetidine(Tagamet), a histamine congener, competitively inhibits histamine binding to histamine H2 receptors.	Neuronal Signaling	C10H16N6S	Free Base	Tagamet, SKF-92334, Tratul, Tametin, Dyspamet, Acinil	CN\C(NCCSCC1=C(C)NC=N1)=N/C#N |c:8,12|	0.007	2	3	7
S1847	Clemastine Fumarate	459.96	14976-57-9	Histamine Receptor	http://www.selleckchem.com/products/Clemastine-Fumarate.html	Clemastine Fumarate (Clemastine) is a selective histamine H1 receptor antagonist with IC50 of 3 nM.	Neuronal Signaling	C25H30ClNO5	Fumarate	Tavist, Agasten	OC(=O)\C=C\C(O)=O.CN1CCC[C@@H]1CCO[C@](C)(C1=CC=CC=C1)C1=CC=C(Cl)C=C1 |r,c:21,23,31,t:19,26,28|	1.81	3	0	8
S1848	Curcumin	368.38	458-37-7	NF-κB,Histone Acetyltransferase,Nrf2	http://www.selleckchem.com/products/Curcumin.html	Curcumin is the principal curcuminoid of the popular Indian spice turmeric, which is a member of the ginger family (Zingiberaceae).	Others	C21H20O6	Free Base	Diferuloylmethane, Natural Yellow 3, C.I. 75300	COC1=CC(\C=C\C(O)=C\C(=O)\C=C\C2=CC(OC)=C(O)C=C2)=CC=C1O |c:21,23,25,t:2,14,18|	3.573	3	3	7
S1849	Daidzein	254.24	486-66-8	Others	http://www.selleckchem.com/products/Daidzein.html	Daidzein belongs to the group of isoflavones.	Others	C15H10O4	Free Base	N/A	OC1=CC=C(C=C1)C1=COC2=CC(O)=CC=C2C1=O |c:3,5,14,16,t:1,8,11|	2.382	2	2	1
S1854	Bifonazole	310.39	60628-96-8	Antifection	http://www.selleckchem.com/products/bifonazole.html	Bifonazole is an antifungal agent and a prostatic aromatase activity inhibitor with IC50 of 1.6 μM.	Others	C22H18N2	Free Base	N/A	C1=CN(C=N1)C(C1=CC=CC=C1)C1=CC=C(C=C1)C1=CC=CC=C1 |c:0,3,9,11,16,18,23,25,t:7,14,21|	4.637	1	0	4
S1855	Pefloxacin Mesylate	429.46	70458-95-6	Antifection	http://www.selleckchem.com/products/pefloxacin-mesylate.html	Pefloxacin mesylate is a synthetic chemotherapeutic agent and an antibacterial agent with IC50 of 6.7 nM.	Others	C18H24FN3O6S	Mesylate	N/A	CS(O)(=O)=O.CCN1C=C(C(O)=O)C(=O)C2=CC(F)=C(C=C12)N1CCN(C)CC1 |c:17,t:7,14,19|	-1.618	2	0	3
S1856	Metoprolol Tartrate	684.81	392-17-7	Adrenergic Receptor	http://www.selleckchem.com/products/metoprolol-tartrate.html	Metoprolol tartrate is a cardioselective β-adrenergic receptor blocker with IC50 of 42 ng/mL.	Neuronal Signaling	C34H56N2O12	Tartrate	N/A	O[C@H]([C@@H](O)C(O)=O)C(O)=O.COCCC1=CC=C(OCC(O)CNC(C)C)C=C1.COCCC1=CC=C(OCC(O)CNC(C)C)C=C1 |r,c:26,45,t:13,15,32,34|	-3.559	6	6	21
S1859	Diethylstilbestrol	268.35	56-53-1	Estrogen/progestogen Receptor	http://www.selleckchem.com/products/Diethylstilbestrol(Stilbestrol).html	Diethylstilbestrol, a synthetic nonsteroidal estrogen used in the treatment of menopausal and postmenopausal disorders.	Others	C18H20O2	Free Base	diethylstilboestrol, DES, Stilbestrol, Agostilben	CC\C(C1=CC=C(O)C=C1)=C(\CC)C1=CC=C(O)C=C1 |c:8,19,t:3,5,14,16|	5.137	0	2	4
S1865	Diltiazem HCl	450.98	33286-22-5	Calcium Channel	http://www.selleckchem.com/products/Diltiazem-HCl(Tiazac).html	Diltiazem HCl (Tiazac) is a benzothiazepine derivative with vasodilating action due to its antagonism of the actions of the calcium ion in membrane functions.	Others	C22H27ClN2O4S	Hydrochloride	Cardizem	Cl.COC1=CC=C(C=C1)[C@@H]1SC2=C(C=CC=C2)N(CCN(C)C)C(=O)[C@@H]1OC(C)=O |r,c:4,6,13,15,t:2,11|	3.475	4	0	7
S1866	Diphenhydramine HCl	291.82	147-24-0	Histamine Receptor	http://www.selleckchem.com/products/Diphenhydramine-hydrochloride(Benadryl).html	Diphenhydramine HCl (Benadryl), a histamine H1 antagonist used as an antiemetic, antitussive, for dermatoses and pruritus, for hypersensitivity reactions, as a hypnotic, an antiparkinson, and as an ingredient in common cold preparations.	Others	C17H22ClNO	Hydrochloride	Dimedrol	Cl.CN(C)CCOC(C1=CC=CC=C1)C1=CC=CC=C1 |c:9,11,16,18,t:7,14|	3.766	1	0	6
S1869	Dapoxetine HCl	341.87	129938-20-1	5-HT Receptor	http://www.selleckchem.com/products/Dapoxetine-hydrochloride(Priligy).html	Dapoxetine hydrochloride is a short-acting novel selective serotonin reuptake inhibitor.	Neuronal Signaling	C21H24ClNO	Hydrochloride	Priligy, LY-210448 hydrochloride	Cl.CN(C)[C@@H](CCOC1=C2C=CC=CC2=CC=C1)C1=CC=CC=C1 |r,c:7,9,11,14,16,21,23,t:19|	4.917	1	0	6
S1876	Valaciclovir HCl	360.8	124832-27-5	Antifection	http://www.selleckchem.com/products/valaciclovir-hcl.html	Valaciclovir hydrochloride is an antiviral drug used in the management of herpes simplex, herpes zoster, and herpes B.	Others	C13H21ClN6O4	Hydrochloride	N/A	Cl.CC(C)[C@H](N)C(=O)OCCOCN1C=NC2=C1N=C(N)NC2=O |r,c:13,15,t:18|	-0.296	6	3	8
S1878	Ganciclovir	255.23	82410-32-0	Antifection	http://www.selleckchem.com/products/ganciclovir.html	Ganciclovir is an antiviral drug for feline herpesvirus type-1 with IC50 of 5.2 μM.	Others	C9H13N5O4	Free Base	Cytovene	NC1=NC2=C(N=CN2COC(CO)CO)C(=O)N1 |c:5,t:1,3|	-1.934	4	4	5
S1880	Roxatidine Acetate HCl	384.9	93793-83-0	Histamine Receptor	http://www.selleckchem.com/products/roxatidine-acetate-hcl.html	Roxatidine Acetate HCl is a specific and competitive histamin H2-receptor antagonist, with IC50 of 3.2 μM, inhibits gastric acid secretion and ulcer formation.	Neuronal Signaling	C19H29ClN2O4	Hydrochloride	N/A	Cl.CC(=O)OCC(=O)NCCCOC1=CC=CC(CN2CCCCC2)=C1 |c:14,24,t:12|	2.148	4	1	10
S1881	Protionamide	180.27	14222-60-7	Antifection	http://www.selleckchem.com/products/protionamide-prothionamide.html	Protionamide is a drug used in the treatment of tuberculosis.	Others	C9H12N2S	Free Base	N/A	CCCC1=NC=CC(=C1)C(N)=S |c:5,7,t:3|	1.954	1	1	3
S1883	Idoxuridine	354.1	54-42-2	Antifection	http://www.selleckchem.com/products/idoxuridine.html	Idoxuridine is an antiviral agent for feline herpesvirus type-1 with IC50 of 4.3 µM.	Others	C9H11IN2O5	Free Base	N/A	OC[C@H]1O[C@H](C[C@@H]1O)N1C=C(I)C(=O)NC1=O |r,t:10|	-1.402	3	3	2
S1884	Sparfloxacin	392.4	110871-86-8	Antifection	http://www.selleckchem.com/products/sparfloxacin.html	Sparfloxacin is a fluoroquinolone antibiotic, shows broad and potent antibacterial activity.	Others	C19H22F2N4O3	Free Base	N/A	C[C@H]1CN(C[C@@H](C)N1)C1=C(F)C2=C(C(=O)C(=CN2C2CC2)C(O)=O)C(N)=C1F |r,c:9,16,28,t:12|	-1.056	2	2	3
S1885	Felodipine	384.25	72509-76-3	Calcium Channel	http://www.selleckchem.com/products/Felodipine(Plendil).html	Felodipine is a selective L-type Ca2+ channel blocker with IC50 of 0.15 nM.	Transmembrane Transporters	C18H19Cl2NO4	Free Base	Renedil, Feloday	CCOC(=O)C1=C(C)NC(C)=C(C1C1=CC=CC(Cl)=C1Cl)C(=O)OC |c:5,10,16,19,t:14|	3.549	4	1	6
S1888	Deflazacort	441.52	14484-47-0	Glucocorticoid Receptor	http://www.selleckchem.com/products/Deflazacor.html	Deflazacort(Calcort) is a glucocorticoid used as an anti-inflammatory and immunosuppressant.	Others	C25H31NO6	Free Base	Cortax, Decortil, Deflanil	[H][C@@]12C[C@@]3([H])[C@]4([H])CCC5=CC(=O)C=C[C@]5(C)[C@@]4([H])[C@@H](O)C[C@]3(C)[C@@]1(N=C(C)O2)C(=O)COC(C)=O |r,c:13,t:9,29|	1.67	6	1	4
S1889	Mitoxantrone	444.48	65271-80-9	Topoisomerase	http://www.selleckchem.com/products/Mitoxantrone.html	Mitoxantrone is a type II topoisomerase inhibitor with IC50 of 2.0 μM, 0.42 mM for HepG2 and MCF-7/wt cells, respectively	Cell Cycle	C22H28N4O6	Free Base	Novantrone	OCCNCCNC1=CC=C(NCCNCCO)C2=C1C(=O)C1=C(O)C=CC(O)=C1C2=O |c:18,23,26,29,t:7,9|	0.068	2	8	12
S1890	Nizatidine	331.46	76963-41-2	Histamine Receptor	http://www.selleckchem.com/products/Nizatidine(Axid).html	Nizatidine is a histamine H2 receptor antagonist with IC50 of 6.7 nM for AChE.	Neuronal Signaling	C12H21N5O2S2	Free Base	Axid	CN\C(NCCSCC1=CSC(CN(C)C)=N1)=C\[N+]([O-])=O |c:15,t:8|	0.643	1	2	10
S1891	Carbidopa	226.23	28860-95-9	Decarboxylase	http://www.selleckchem.com/products/Carbidopa.html	Carbidopa is an aromatic-L-amino-acid decarboxylase inhibitor with an IC50 of 29 ± 2 μM.	Others	C10H14N2O4	Free Base	Lodosyn	C[C@@](CC1=CC(O)=C(O)C=C1)(NN)C(O)=O |r,c:9,t:3,6|	0.364	1	4	4
S1894	Valsartan	435.52	137862-53-4	RAAS	http://www.selleckchem.com/products/Valsartan(Diovan).html	Valsartan (Diovan) is an angiotensin II receptor antagonist with IC50 of ranging from 39.5 to 116 μM	Endocrinology & Hormones	C24H29N5O3	Free Base	N/A	[H][C@@](C(C)C)(N(CC1=CC=C(C=C1)C1=CC=CC=C1C1=NNN=N1)C(=O)CCCC)C(O)=O |r,c:9,11,16,18,24,t:7,14,21|	4.538	5	1	10
S1895	Dipyridamole	504.63	58-32-2	PDE	http://www.selleckchem.com/products/Dipyridamole(Permole,-Persantine).html	Dipyridamole (Persantine) is a phosphodiesterase inhibitor that blocks uptake and metabolism of adenosine by erythrocytes and vascular endothelial cells.	Others	C24H40N8O4	Free Base	Permole	OCCN(CCO)C1=NC2=C(N=C(N=C2N2CCCCC2)N(CCO)CCO)C(=N1)N1CCCCC1 |c:11,13,30,t:7,9|	2.483	4	4	12
S1896	Hydroxyurea	76.05	127-07-1	DNA/RNA Synthesis	http://www.selleckchem.com/products/Hydroxyurea(Cytodrox).html	Hydroxyurea is an antineoplastic agent that inhibits DNA synthesis through the inhibition of ribonucleoside diphosphate reductase.	Others	CH4N2O2	Free Base	Hydrea, Biosupressin	NC(=O)NO	-1.03	1	2	0
S1897	Potassium Iodide	166	7681-11-0	Others	http://www.selleckchem.com/products/Potassium-iodide.html	Potassium iodide is used to treat overactive thyroid and to protect the thyroid gland from the effects of radiation from inhaled or swallowed radioactive iodine.	Others	IK	Inorganic salt	N/A	[K+].[I-]	-3.113	0	0	0
S1898	Tropisetron HCl	320.81	105826-92-4	5-HT Receptor	http://www.selleckchem.com/products/Tropisetron-hydrochloride.html	Tropisetron is a selective 5-HT3 receptor antagonist and α7-nicotinic receptor agonist with an IC50 of 70.1 ± 0.9 nM for 5-HT3 receptor.	Neuronal Signaling	C17H21ClN2O2	Hydrochloride	Navoban	Cl.[H][C@]12CC[C@]([H])(CC(C1)OC(=O)C1C=NC3=CC=CC=C13)N2C |r,c:14,18,t:16,20|	2.366	3	0	3
S1899	Nicotinamide (Vitamin B3)	122.12	98-92-0	Sirtuin	http://www.selleckchem.com/products/Nicotinamide(Niacinamide).html	Nicotinamide (Vitamin B3) is a water-soluble vitamin and is part of the vitamin B group.	Others	C6H6N2O	Free Base	Niacinamide, Nicotinic acid amide	NC(=O)C1=CC=CN=C1 |c:5,7,t:3|	-0.319	2	1	1
S1902	Vitamin B12	1355.37	68-19-9	Vitamin	http://www.selleckchem.com/products/Vitamin-B12.html	Vitamin B12 is a water soluble vitamin with a key role in the normal functioning of the brain and nervous system, and for the formation of blood.	Others	C63H88CoN14O14P	Free Base	Cobalamin, vitamin B-12, Cyanocobalamin	[Co++]C#N.[H][C@]12N=C(\C(C)=C3/N=C(/C=C4\N=C(\C(C)=C5/[N-][C@]1(C)[C@@](C)(CC(N)=O)[C@@H]5CCC(N)=O)[C@@](C)(CC(N)=O)[C@@H]4CCC(N)=O)C(C)(C)[C@@H]3CCC(N)=O)[C@](C)(CCC(=O)NC[C@@H](C)OP([O-])(=O)O[C@@H]1[C@@H](CO)O[C@@H]([C@@H]1O)N1C=NC3=C1C=C(C)C(C)=C3)[C@H]2CC(N)=O |r,c:7,11,16,83,85,92,t:4,9,13,88|	-1.129	14	9	26
S1903	Diclofenac Sodium	318.13	15307-79-6	COX	http://www.selleckchem.com/products/Diclofenac-sodium.html	Diclofenac Sodium is a non-selective COX inhibitor with IC50 of 60 and 220 nM for ovine COX-1 and -2, respectively.	Neuronal Signaling	C14H10Cl2NNaO2	Sodium Salt	Voltaren, Solaraze, Ecofenac	[Na+].[O-]C(=O)CC1=C(NC2=C(Cl)C=CC=C2Cl)C=CC=C1 |c:4,7,10,12,16,18|	2.899	0	1	4
S1904	Avobenzone	310.39	70356-09-1	Others	http://www.selleckchem.com/products/Avobenzone(Parsol-1789).html	Avobenzone is an oil soluble ingredient used in sunscreen products to absorb the full spectrum of UVA rays and a dibenzoylmethane derivative.	Others	C20H22O3	Free Base	Eusolex 9020, Escalol 517, Parsol 1789	COC1=CC=C(C=C1)C(=O)CC(=O)C1=CC=C(C=C1)C(C)(C)C |c:4,6,16,18,t:2,14|	4.538	3	0	6
S1905	Amlodipine	408.88	88150-42-9	Calcium Channel	http://www.selleckchem.com/products/Amlodipine(Norvasc).html	Amlodipine(Norvasc) is a long-acting calcium channel blocker with an IC50 of 1.9 nM.	Transmembrane Transporters	C20H25ClN2O5	Free Base	Istin, Norvasc, Caduet	CCOC(=O)C1=C(COCCN)NC(C)=C(C1C1=C(Cl)C=CC=C1)C(=O)OC |c:5,14,18,21,23|	1.576	5	2	10
S1907	Metronidazole	171.15	443-48-1	DNA/RNA Synthesis	http://www.selleckchem.com/products/Metronidazole(Flagyl).html	Metronidazole(Flagyl)is a nitroimidazole antibiotic medication used particularly for anaerobic bacteria and protozoa.	Others	C6H9N3O3	Free Base	Nidagyl, Mepagyl, Anagiardil, Bayer 5360, NSC 50364, NSC69587	CC1=NC=C(N1CCO)[N+]([O-])=O |c:3,t:1|	-0.337	1	1	3
S1908	Flutamide	276.21	13311-84-7	Androgen Receptor	http://www.selleckchem.com/products/Flutamide(Eulexin).html	Flutamide is an antiandrogen drug, with its active metablolite binding at androgen receptor with Ki values of 55 nM, and primarily used to treat prostate cancer. Phase 4.	Endocrinology & Hormones	C11H11F3N2O3	Free Base	Flutamin, Drogenil	CC(C)C(=O)NC1=CC(=C(C=C1)[N+]([O-])=O)C(F)(F)F |c:8,10,t:6|	2.916	1	1	4
S1909	Fluvastatin Sodium	433.45	93957-55-2	HMG-CoA Reductase	http://www.selleckchem.com/products/Fluvastatin-Sodium(Lescol).htm	Fluvastatin Sodium inhibits HMG-CoA reductase activity with IC50 of 8 nM.	Metabolism	C24H25FNNaO4	Sodium	Vastin	[Na+].CC(C)N1C(\C=C\[C@@H](O)C[C@@H](O)CC([O-])=O)=C(C2=C1C=CC=C2)C1=CC=C(F)C=C1 |r,c:15,17,20,22,30,t:25,27|	2.77	0	2	8
S1910	Tioconazole	387.71	65899-73-2	Antifection	http://www.selleckchem.com/products/tioconazole.html	Tioconazole is an antifungal medication with an average IC50 of 1.7 μM.	Others	C16H13Cl3N2OS	Free Base	N/A	ClC1=C(COC(CN2C=CN=C2)C2=CC=C(Cl)C=C2Cl)C=CS1 |c:1,8,10,18,22,t:13,15|	4.437	2	0	6
S1913	Tropicamide	284.35	1508-75-4	AChR	http://www.selleckchem.com/products/tropicamide.html	Tropicamide is an anticholinergic and a muscarinic receptor subtype M4-preferring antagonist with IC50 of 8.0 nM.	Neuronal Signaling	C17H20N2O2	Free Base	N/A	CCN(CC1=CC=NC=C1)C(=O)C(CO)C1=CC=CC=C1 |c:6,8,18,20,t:4,16|	1.432	2	1	6
S1914	Pregnenolone	316.48	145-13-1	Estrogen/progestogen Receptor	http://www.selleckchem.com/products/pregnenolone.html	Pregnenolone is an endogenous steroid hormone for inhibition of M1 receptor- and M3 receptor-mediated currents with IC50 of 11.4 µM and 6.0 µM, respectively.	Endocrinology & Hormones	C21H32O2	Free Base	N/A	[H][C@@]12CC[C@H](C(C)=O)[C@@]1(C)CC[C@@]1([H])[C@@]2([H])CC=C2C[C@@H](O)CC[C@]12C |r,t:19|	3.624	1	1	1
S1915	Sulfamethoxazole	253.28	723-46-6	Antifection	http://www.selleckchem.com/products/Sulfamethoxazole.html	Sulfamethoxazole is a sulfonamide bacteriostatic antibiotic with an IC50 of 2.7 μM.	Others	C10H11N3O3S	Free Base	Gantanol	CC1=CC(NS(=O)(=O)C2=CC=C(N)C=C2)=NO1 |c:13,15,t:1,8,10|	0.709	4	2	3
S1916	Sulfisoxazole	267.3	127-69-5	Antifection	http://www.selleckchem.com/products/Sulfisoxazole.html	Sulfisoxazole is a sulfonamide antibacterial with an oxazole substituent.	Others	C11H13N3O3S	Free Base	Sulfafurazole, Gantrisin Pediatric	CC1=NOC(NS(=O)(=O)C2=CC=C(N)C=C2)=C1C |c:14,16,t:1,9,11|	0.918	4	2	3
S1917	Crystal Violet	407.98	548-62-9	Others	http://www.selleckchem.com/products/Crystal-violet.html	Crystal violet is a triarylmethane dye.	Others	C25H30ClN3	quaternary-N chloride salt	Gentian violet, Hexamethyl pararosaniline chloride	[Cl-].CN(C)C1=CC=C(C=C1)C(C1=CC=C(C=C1)N(C)C)=C1C=CC(C=C1)=[N+](C)C |c:5,7,13,15,22,25,t:3,11|	2.25	0	0	4
S1920	Haloperidol	375.86	52-86-8	Dopamine Receptor	http://www.selleckchem.com/products/Haloperidol(Haldol).html	Haloperidol (Haldol) is an antipsychotic and butyrophenone.	Others	C21H23ClFNO2	Free Base	Aloperidin, Bioperidolo, Brotopon, Dozic, Duraperidol, Einalon S	OC1(CCN(CCCC(=O)C2=CC=C(F)C=C2)CC1)C1=CC=C(Cl)C=C1 |c:15,26,t:10,12,21,23|	3.887	1	0	6
S1921	Phenindione	222.24	83-12-5	Vitamin	http://www.selleckchem.com/products/Phenindione(Rectadione).html	Phenindione is an anticoagulant which functions as a Vitamin K antagonist.	Others	C15H10O2	Free Base	Dindevan, Rectadione	O=C1C(C(=O)C2=CC=CC=C12)C1=CC=CC=C1 |c:7,15,17,t:5,9,13|	2.819	2	0	1
S1928	Alibendol	251.28	26750-81-2	Others	http://www.selleckchem.com/products/alibendol.html	Alibendol is an antispasmodic,choleretic, and cholekinetic.	Others	C13H17NO4	Free Base	N/A	COC1=CC(CC=C)=CC(C(=O)NCCO)=C1O |c:7,15,t:2|	1.248	2	3	6
S1929	Irsogladine	256.09	57381-26-7	AChR,PDE	http://www.selleckchem.com/products/Irsogladine-maleate.html	Irsogladine is an anti-gastric ulcer agent that facilitates gap-junctional intercellular communication through M1 muscarininc acetylcholine receptor binding.	Metabolism	C9H7Cl2N5	Free Base	N/A	NC1=NC(=NC(N)=N1)C1=C(Cl)C=CC(Cl)=C1 |c:3,6,9,12,15,t:1|	2.443	3	2	1
S1933	Triamcinolone	394.43	124-94-7	Glucocorticoid Receptor	http://www.selleckchem.com/products/Triamcinolone(Aristocort).html	Triamcinolone is a glucocorticoid given, as the free alcohol or in esterified form, orally, intramuscularly, by local injection, by inhalation, or applied topically in the management of various disorders in which corticosteroids are indicated.	Others	C21H27FO6	Free Base	Kenacort, Tri-Nasal, Triaderm, Azmacort, Trilone, Volon A, Tristoject, Fougera, Tricortone	[H][C@@]12C[C@@H](O)[C@](O)(C(=O)CO)[C@@]1(C)C[C@H](O)[C@@]1(F)[C@@]2([H])CCC2=CC(=O)C=C[C@]12C |r,c:28,t:24|	0.422	2	3	2
S1934	Nystatin (Fungicidin)	1056.24	62997-67-5	Others	http://www.selleckchem.com/products/Nystatin(Mycostatin).htm	Nystatin, which belongs to the polyene group of antimycotics, is frequently used as a topical agent in the treatment of oro-pharyngeal candidosis.	Others	C47H75NO17	Free Base	N/A	C[C@@H]1OC(C[C@@H](O)[C@H]1O)O[C@@H]1[C@@H](C)\C=C\C=C\CC\C=C\C=C\C=C\C=C\[C@@H](C[C@@H]2O[C@@](O)(C[C@H](O)[C@H]2C(O)=O)C[C@@H](O)[C@H](O)CC[C@@H](O)C[C@@H](O)C[C@@H](O)CC(=O)O[C@@H](C)[C@@H]1C)O[C@H]1O[C@@H](C)[C@H](O)[C@@H](N)[C@H]1O	-2.265	8	11	5
S1937	Isoniazid	137.14	54-85-3	Antifection	http://www.selleckchem.com/products/Isoniazid(Tubizid).html	Isoniazid is a prodrug and must be activated by bacterial catalase.	Others	C6H7N3O	Free Base	Tubizid, Laniazid, Nydrazid, Isonicotinylhydrazine	NNC(=O)C1=CC=NC=C1 |c:6,8,t:4|	-0.811	2	2	1
S1940	Levofloxacin	361.37	100986-85-4	Topoisomerase	http://www.selleckchem.com/products/Levofloxacin(Levaquin).html	Levofloxacin is a synthetic fluoroquinolone (fluoroquinolones) antibacterial agent.	Others	C18H20FN3O4	Free Base	Levaquin, Tavanic	[H][C@]1(C)COC2=C(N3CCN(C)CC3)C(F)=CC3=C2N1C=C(C(O)=O)C3=O |r,c:5,16,18,t:23|	-1.374	3	0	2
S1941	Enalapril Maleate	492.52	76095-16-4	RAAS	http://www.selleckchem.com/products/Enalapril-maleate(Vasotec).html	Enalapril Maleate, the active metabolite of enalapril, competes with angiotensin I for binding at the angiotensin-converting enzyme, blocking the conversion of angiotensin I to angiotensin II.	Endocrinology & Hormones	C24H32N2O9	Maleate	Glioten, Renitec	OC(=O)\C=C/C(O)=O.CCOC(=O)[C@H](CCC1=CC=CC=C1)N[C@@H](C)C(=O)N1CCC[C@H]1C(O)=O |r,c:17,19,t:15|	-0.502	6	1	12
S1949	Menadione	172.18	58-27-5	DNA/RNA Synthesis,phosphatase	http://www.selleckchem.com/products/Menadione.html	Menadione, a synthetic naphthoquinone without the isoprenoid side chain and biological activity, but can be converted to active vitamin K2, menaquinone, after alkylation in vivo.	Others	C11H8O2	Free Base	Vitamin K3	CC1=CC(=O)C2=CC=CC=C2C1=O |c:7,9,t:1,5|	2.204	2	0	0
S1952	Methoxsalen	216.19	298-81-7	P450 (e.g. CYP17)	http://www.selleckchem.com/products/Methoxsalen(Oxsoralen).html	Methoxsalen (Oxsoralen) a naturally occurring furocoumarin compound found in several species of plants, including Psoralea corylifolia, is an agent used to treat psoriasis, eczema, vitiligo and some cutaneous Lymphomas in conjunction with exposing the skin to sunlight.	Others	C12H8O4	Free Base	Xanthotoxin, Metoxaleno, Dltasoralen, Meladinine, Uvadex	COC1=C2OC=CC2=CC2=C1OC(=O)C=C2 |c:2,5,8,10,16|	2.187	4	0	1
S1956	Miconazole Nitrate	479.14	22832-87-7	Antifection	http://www.selleckchem.com/products/Miconazole-nitrate.html	Miconazole is an imidazole antifungal agent that is used topically and by intravenous infusion.	Others	C18H15Cl4N3O4	Nitrate	Fungisdin, Albistat, Andergin, Daktacort	O[N+]([O-])=O.ClC1=CC=C(COC(CN2C=CN=C2)C2=CC=C(Cl)C=C2Cl)C(Cl)=C1 |c:13,15,23,28,t:4,6,18,20|	4.387	2	0	6
S1957	Sulfamethizole	270.33	144-82-1	Antifection	http://www.selleckchem.com/products/Sulfamethizole(Proklar).html	Sulfamethizole(Proklar) is a sulfathiazole antibacterial agent.	Others	C9H10N4O2S2	Free Base	Proklar	CC1=NN=C(NS(=O)(=O)C2=CC=C(N)C=C2)S1 |c:14,t:1,3,9,11|	0.305	4	2	3
S1958	Sulbactam	233.24	68373-14-8	Antifection	http://www.selleckchem.com/products/sulbactam.html	Sulbactam is a beta-lactamase inhibitor with an average IC50 of 0.8 μM.	Others	C8H11NO5S	Free Base	N/A	[H][C@@]12CC(=O)N1[C@@]([H])(C(O)=O)C(C)(C)S2(=O)=O |r|	-0.671	4	0	1
S1959	Tolfenamic Acid	261.7	13710-19-5	COX	http://www.selleckchem.com/products/tolfenamic-acid.html	Tolfenamic acid is a COX-2 inhibitor with IC50 of 0.2 μM.	Neuronal Signaling	C14H12ClNO2	Free Base	N/A	CC1=C(Cl)C=CC=C1NC1=C(C=CC=C1)C(O)=O |c:1,4,6,12,14,t:10|	4.16	1	1	3
S1960	Pranoprofen	255.27	52549-17-4	COX	http://www.selleckchem.com/products/pranoprofen.html	Pranoprofen is a PGE2 inhibitor with IC50 of 7.5 μM.	Others	C15H13NO3	Free Base	N/A	CC(C(O)=O)C1=CC2=C(OC3=NC=CC=C3C2)C=C1 |c:12,14,19,t:5,7,10|	3.05	3	0	2
S1962	Sulphadimethoxine	310.33	122-11-2	Antifection	http://www.selleckchem.com/products/sulphadimethoxine.html	Sulphadimethoxine is a non-reducing glucuronide.	Others	C12H14N4O4S	Free Base	Di-Methox, Albon	COC1=CC(NS(=O)(=O)C2=CC=C(N)C=C2)=NC(OC)=N1 |c:14,16,20,t:2,9,11|	1.358	6	2	5
S1964	Rimantadine	179.3	13392-28-4	Antifection	http://www.selleckchem.com/products/rimantadine-flumadine.html	Rimantadine (Flumadine) is an anti-influenza virus drug for T. brucei with IC50 of 7 μM.	Others	C12H21N	Free Base	N/A	CC(N)C12CC3CC(CC(C3)C1)C2	2.204	0	1	1
S1965	Primidone	218.25	125-33-7	Sodium Channel	http://www.selleckchem.com/products/Primidone(Mysoline).html	Primidone(Mysoline) is an anticonvulsant of the pyrimidinedione class.	Others	C12H14N2O2	Free Base	Mysoline, Neurosyn, Mylepsin	CCC1(C(=O)NCNC1=O)C1=CC=CC=C1 |c:13,15,t:11|	0.931	2	2	2
S1969	Nefiracetam	246.3	77191-36-7	GABA Receptor	http://www.selleckchem.com/products/Nefiracetam(Translon).html	Nefiracetam is a GABAergic, cholinergic, and monoaminergic neuronal systems enhancer for Ro 5-4864-induced convulsions. Phase 2.	Neuronal Signaling	C14H18N2O2	Free Base	DM 9384, Translon, DZL-221	CC1=CC=CC(C)=C1NC(=O)CN1CCCC1=O |c:3,6,t:1|	1.443	2	1	3
S1971	Nicorandil	211.17	65141-46-0	Potassium Channel	http://www.selleckchem.com/products/Nicorandil(Ikorel).html	Nicorandil is potassium channel activator.	Transmembrane Transporters	C8H9N3O4	Free Base	Ikorel, Dancor, Nikoran, Aprior, Nitorubin, Sigmart	[O-][N+](=O)OCCNC(=O)C1=CC=CN=C1 |c:11,13,t:9|	1.758	3	1	5
S1972	Tamoxifen Citrate	563.64	54965-24-1	Autophagy,Estrogen/progestogen Receptor	http://www.selleckchem.com/products/Tamoxifen-Citrate(Nolvadex).html	Tamoxifen Citrate is an antagonist of the estrogen receptor by competitive inhibition of estrogen binding.	Endocrinology & Hormones	C32H37NO8	Citrate	Istubal	OC(=O)CC(O)(CC(O)=O)C(O)=O.CC\C(C1=CC=CC=C1)=C(/C1=CC=CC=C1)C1=CC=C(OCCN(C)C)C=C1 |c:17,19,25,27,40,t:15,23,30,32|	1.966	4	0	13
S1973	Cyclocytidine HCl	261.66	10212-25-6	DNA/RNA Synthesis	http://www.selleckchem.com/products/cyclocytidine-hcl.html	Cyclocytidine is the prodrug of cytarabine, which is a pyrimidine nucleoside analog that inhibits the DNA synthesis and used mainly in the treatment of leukemia.	Others	C9H12ClN3O4	Hydrochloride	N/A	Cl.OC[C@H]1O[C@@H]2[C@@H](OC3=NC(=N)C=CN23)[C@@H]1O |r,c:11,t:7|	-1.395	3	2	1
S1974	Meglumine	195.21	6284-40-8	Others	http://www.selleckchem.com/products/meglumine.html	Meglumine is an amino sugar derived from sorbitol for THP-1 cells with IC50 of 22 μg/mL.	Others	C7H17NO5	Free Base	N/A	CNC[C@H](O)[C@@H](O)[C@H](O)[C@H](O)CO |r|	-2.798	0	6	6
S1975	Aripiprazole	448.39	129722-12-9	5-HT Receptor	http://www.selleckchem.com/products/aripiprazole-abilify.html	Aripiprazole is a human 5-HT1A receptor partial agonist with a Ki of 4.2 nM.	Neuronal Signaling	C23H27Cl2N3O2	Free Base	N/A	ClC1=CC=CC(N2CCN(CCCCOC3=CC=C4CCC(=O)NC4=C3)CC2)=C1Cl |c:3,25,30,t:1,15,17|	4.998	2	1	7
S1977	Sarafloxacin HCl	421.83	91296-87-6	Antifection	http://selleckchem.com/products/sarafloxacin-hydrochloride.html	Sarafloxacin HCl is a hydrochloride salt form of sarafloxacin which is a quinolone antibiotic drug with IC50 of 0.96 μg/L.	Others	C20H18ClF2N3O3	Hydrochloride	N/A	Cl.OC(=O)C1=CN(C2=CC=C(F)C=C2)C2=C(C=C(F)C(=C2)N2CCNCC2)C1=O |c:11,19,t:3,6,8,14,16|
S1978	Methscopolamine	398.29	155-41-9	AChR	http://www.selleckchem.com/products/Methscopolamine-bromide(Pamine).html	Methscopolamine (Pamine) is a muscarinic acetylcholine receptor blocker.	Neuronal Signaling	C18H24BrNO4	quaternary-N bromide salt	N/A	[Br-].[H][C@]12O[C@@]1([H])[C@]1([H])C[C@@H](C[C@@]2([H])[N+]1(C)C)OC(=O)[C@H](CO)C1=CC=CC=C1 |r,c:26,28,t:24|	-2.949	3	1	5
S1979	Amiodarone HCl	681.77	19774-82-4	Autophagy,Potassium Channel	http://www.selleckchem.com/products/amiodarone-hcl.html	Amiodarone HCl is an antiarrhythmic drug for inhibition of ATP-sensitive potassium channel with IC50 of 19.1 μM.	Transmembrane Transporters	C25H30ClI2NO3	Hydrochloride	N/A	Cl.CCCCC1=C(C(=O)C2=CC(I)=C(OCCN(CC)CC)C(I)=C2)C2=C(O1)C=CC=C2 |c:4,22,25,29,31,t:8,11|	7.62	3	0	11
S1983	Adenine HCl	171.59	2922-28-3	DNA/RNA Synthesis	http://www.selleckchem.com/products/adenine-hydrochloride.html	Adenine hydrochloride is a hydrochloride salt form of adenine which is a purine derivative and a nucleobase with a variety of roles in biochemistry.	DNA Damage	C5H6ClN5	Hydrochloride	N/A	Cl.NC1=NC=NC2=C1N=CN2 |c:3,5,8,t:1|	-0.06	3	2	0
S1986	Meclizine 2HCl	463.87	1104-22-9	Histamine Receptor	http://selleckchem.com/products/meclizine-dihydrochloride.html	Meclizine is a histamine H1 receptor antagonist used to treat nausea and motion sickness, has anti-histamine, anti-muscarinic and anti-oxidative phosphorylation properties, also an agonist ligand for mCAR (constitutive androstane receptor) and an inverse agonist for hCAR.	Neuronal Signaling	C25H29Cl3N2	Dihydrochloride	N/A	Cl.Cl.CC1=CC(CN2CCN(CC2)C(C2=CC=CC=C2)C2=CC=C(Cl)C=C2)=CC=C1 |c:15,17,25,27,29,t:1,13,20,22|
S1987	Mometasone furoate	521.43	83919-23-7	Glucocorticoid Receptor	http://www.selleckchem.com/products/mometasone-furoate.html	Mometasone furoate is a glucocorticosteroid used topically to reduce inflammation of the skin or in the airways.	Others	C27H30Cl2O6	Furoate	N/A	[H][C@@]12C[C@@H](C)[C@](OC(=O)C3=CC=CO3)(C(=O)CCl)[C@@]1(C)C[C@H](O)[C@@]1(Cl)[C@@]2([H])CCC2=CC(=O)C=C[C@]12C |r,c:11,36,t:9,32|	4.616	5	1	5
S1988	Propylthiouracil	170.23	51-52-5	Others	http://www.selleckchem.com/products/Propylthiouracil.html	Propylthiouracil is a thyroperoxidase and 5'-deiodinase inhibitor.	Others	C7H10N2OS	Free Base	6-n-Propylthiouracil	CCCC1=CC(=O)NC(=S)N1 |t:3|	1.575	1	2	2
S1992	Fluticasone propionate	500.57	80474-14-2	Glucocorticoid Receptor	http://www.selleckchem.com/products/fluticasone-propionate-Flonase-Veramyst.html	Fluticasone propionate (Flonase, Veramyst) is a synthetic corticosteroid which is derived from fluticasone used to treat asthma and allergic rhinitis (hay fever).	Others	C25H31F3O5S	Free Base	N/A	[H][C@@]12C[C@@H](C)[C@](OC(=O)CC)(C(=O)SCF)[C@@]1(C)C[C@H](O)[C@@]1(F)[C@@]2([H])C[C@H](F)C2=CC(=O)C=C[C@]12C |r,c:34,t:30|	4.086	4	1	6
S1994	Lacidipine	455.54	103890-78-4	Calcium Channel	http://www.selleckchem.com/products/lacidipine-lacipil-motens.html	Lacidipine (Lacipil, Motens) is a L-type calcium channel blocker.	Transmembrane Transporters	C26H33NO6	Free Base	Lacipil, Motens	CCOC(=O)C1=C(C)NC(C)=C(C1C1=C(\C=C\C(=O)OC(C)(C)C)C=CC=C1)C(=O)OCC |c:5,10,14,25,27|	3.824	6	1	11
S2001	Elvitegravir (GS-9137, JTK-303)	447.88	697761-98-1	Integrase	http://www.selleckchem.com/products/Elvitegravir.html	Elvitegravir (EVG, JTK-303/GS-9137) is an HIV integrase inhibitor for HIV-1 IIIB, HIV-2 EHO and HIV-2 ROD with IC50 of 0.7 nM, 2.8 nM and 1.4 nM, respectively.	Microbiology	C23H23ClFNO5	Free Base	N/A	COC1=CC2=C(C=C1CC1=C(F)C(Cl)=CC=C1)C(=O)C(=CN2[C@H](CO)C(C)C)C(O)=O |r,c:4,6,10,14,16,21,t:2|	4.665	3	1	7
S2003	Maraviroc	513.67	376348-65-1	CCR	http://www.selleckchem.com/products/Maraviroc.html	Maraviroc is a CCR5 antagonist for MIP-1α, MIP-1β and RANTES with IC50 of 3.3 nM, 7.2 nM and 5.2 nM, respectively.	Microbiology	C29H41F2N5O	Free Base	UK-427857, Celsentri	CC(C)C1=NN=C(C)N1C1CC2CCC(C1)N2CC[C@H](NC(=O)C1CCC(F)(F)CC1)C1=CC=CC=C1 |r,c:37,39,t:3,5,35|	3.921	3	1	8
S2005	Raltegravir (MK-0518)	444.42	518048-05-0	Integrase	http://www.selleckchem.com/products/Raltegravir-(MK-0518).html	Raltegravir (MK-0518) is a potent integrase (IN) inhibitor for WT and S217Q PFV IN with IC50 of 90 nM and 40 nM, respectively.	Microbiology	C20H21FN6O5	Free Base	Isentress	CN1C(=O)C(O)=C(N=C1C(C)(C)NC(=O)C1=NN=C(C)O1)C(=O)NCC1=CC=C(F)C=C1 |c:5,7,32,t:16,18,27,29|	-0.291	7	3	6
S2006	Pyrimethamine	248.71	58-14-0	DHFR	http://www.selleckchem.com/products/Pyrimethamine.html	Pyrimethamine is a dihydrofolate reductase(DHFR) inhibitor with an IC50 of 15.4 nM.	Metabolism	C12H13ClN4	Free Base	Daraprim	CCC1=NC(N)=NC(N)=C1C1=CC=C(Cl)C=C1 |c:5,8,16,t:2,11,13|	2.75	2	2	2
S2007	Sulindac	356.41	38194-50-2	COX	http://www.selleckchem.com/products/Sulindac(Clinoril).html	Sulindac (Clinoril) is a non-steroidal anti-inflammatory agent of the arylalkanoic acid class.	Others	C20H17FO3S	Free Base	Clinoril, Aflodac, Sulreuma	CC1=C(CC(O)=O)C2=C(C=CC(F)=C2)C\1=C/C1=CC=C(C=C1)S(C)=O |c:1,9,12,20,22,t:7,18|	3.639	2	0	4
S2011	Pramipexole 2HCl Monohydrate	302.26	191217-81-9	Dopamine Receptor	http://www.selleckchem.com/products/Pramipexole-dihydrochloride-monohydrate.html	Pramipexole is a partial/full D2S, D2L, D3, D4, receptor agonist with a Ki of 3.9, 2.2, 0.5, 5.1 nM.	Neuronal Signaling	C10H21Cl2N3OS	Dihydrochloride monohydrate	Mirapex	O.Cl.Cl.CCCN[C@H]1CCC2=C(C1)SC(N)=N2 |r,c:7,13|	1.94	1	2	3
S2012	PCI-34051	296.32	950762-95-5	HDAC	http://www.selleckchem.com/products/pci-34051.html	PCI-34051 is a potent and specific HDAC8 inhibitor with IC50 of 10 nM. It has greater than 200-fold selectivity over HDAC1 and 6, more than 1000-fold selectivity over HDAC2, 3, and 10.	Epigenetics	C17H16N2O3	Free Base	N/A	COC1=CC=C(CN2C=CC3=C2C=C(C=C3)C(=O)NO)C=C1 |c:8,10,13,15,22,t:2,4|	2.911	2	1	4
S2013	PF-573228	491.49	869288-64-2	FAK	http://www.selleckchem.com/products/pf-573228.html	PF-573228 is an ATP-competitive inhibitor of FAK with IC50 of 4 nM, ~50- to 250-fold selective for FAK than Pyk2, CDK1/7 and GSK-3β.	Angiogenesis	C22H20F3N5O3S	Free Base	N/A	CS(=O)(=O)C1=CC(CNC2=NC(NC3=CC4=C(NC(=O)CC4)C=C3)=NC=C2C(F)(F)F)=CC=C1 |c:23,25,27,33,35,t:4,9,13,15|	3.967	5	3	7
S2014	BMS-265246	345.34	582315-72-8	CDK	http://www.selleckchem.com/products/bms-265246.html	BMS-265246 is a potent and selective CDK1/2 inhibitor with IC50 of 6 nM/9 nM. It is 25-fold more selective for CDK1/2 than CDK4.	Cell Cycle	C18H17F2N3O2	Free Base	N/A	CCCCOC1=C2C=NNC2=NC=C1C(=O)C1=C(F)C=C(C)C=C1F |c:5,7,11,13,18,24,t:21|	4.135	4	1	6
S2015	Suplatast Tosylate	499.64	94055-76-2	IL Receptor	http://www.selleckchem.com/products/suplatast-tosilate.html	Suplatast Tosilate is a novel capsular anti-asthmatic agent that suppresses both IgE production, IL-4 and IL-5 synthesis with IC50 above 100 μM.	Others	C23H33NO7S2	Tosylate	IPD 1151T	CC1=CC=C(C=C1)S([O-])(=O)=O.CCOCC(O)COC1=CC=C(NC(=O)CC[S+](C)C)C=C1 |c:3,5,31,t:1,19,21|	0.877	3	2	11
S2016	Mirtazapine	265.35	85650-52-8	5-HT Receptor	http://www.selleckchem.com/products/mirtazapine-remeron-avanza.html	Mirtazapine is a potent tetracyclic antidepressant.	Others	C17H19N3	Free Base	N/A	CN1CCN2C(C1)C1=C(CC3=C2N=CC=C3)C=CC=C1 |c:8,11,14,16,19,21|	3.094	1	0	0
S2017	Benidipine HCl	542.02	91599-74-5	Calcium Channel	http://www.selleckchem.com/products/benidipine-hydrochloride.html	Benidipine HCl is a hydrochloride salt form of benidipine which is a dihydropyridine calcium channel blocker.	Transmembrane Transporters	C28H32ClN3O6	Hydrochloride	N/A	Cl.COC(=O)C1=C(C)NC(C)=C([C@@H]1C1=CC(=CC=C1)[N+]([O-])=O)C(=O)O[C@@H]1CCCN(CC2=CC=CC=C2)C1 |r,c:4,9,15,17,34,36,t:13,32|	4.36	4	1	9
S2018	ENMD-2076 L-(+)-Tartaric acid	525.56	1291074-87-7	Aurora Kinase,FLT3,VEGFR	http://selleckchem.com/products/enmd-2076-l-tartaric-acid.html	ENMD-2076 L-(+)-Tartaric acid is the tartaric acid of ENMD-2076, selective activity against Aurora A and Flt3 with IC50 of 14 nM and 1.86 nM, 25-fold more selective for Aurora A than Aurora B and less potent to VEGFR2/KDR and VEGFR3, FGFR1 and FGFR2 and PDGFRα. Phase 2.	Angiogenesis	C25H31N7O6	Free Base	N/A	O[C@H]([C@@H](O)C(O)=O)C(O)=O.CN1CCN(CC1)C1=NC(\C=C\C2=CC=CC=C2)=NC(NC2=NNC(C)=C2)=C1 |r,c:24,26,28,36,38,t:17,22,32|	-0.683	5	4	8
S2020	Formoterol Hemifumarate	402.4	43229-80-7	Adrenergic Receptor	http://www.selleckchem.com/products/formoterol-hemifumarate.html	Formoterol hemifumarate is a potent, selective and long-acting β2-adrenoceptor agonist to β2 and β1 receptors with pKd of 8.12 and 5.58, respectively.	Neuronal Signaling	C42H52N4O12	Hemifumarate	N/A	OC(=O)\C=C\C(O)=O.COC1=CC=C(C[C@H](C)NC[C@@H](O)C2=CC=C(O)C(NC=O)=C2)C=C1.COC1=CC=C(C[C@H](C)NC[C@@H](O)C2=CC=C(O)C(NC=O)=C2)C=C1 |r,c:28,31,54,57,t:9,11,20,22,35,37,46,48|	-1.526	6	8	18
S2021	Chlormezanone	273.74	80-77-3	Others	http://www.selleckchem.com/products/Chlormezanone(Trancopal).html	Chlormezanone(Trancopal)，a non-benzodiazepine that is used in the management of anxiety. It has been suggested for use in the treatment of muscle spasm.	Others	C11H12ClNO3S	Free Base	Trancopal	CN1C(C2=CC=C(Cl)C=C2)S(=O)(=O)CCC1=O |c:8,t:3,5|	1.559	3	0	1
S2024	Ketotifen Fumarate	425.5	34580-14-8	Histamine Receptor	http://www.selleckchem.com/products/ketotifen-fumarate-zaditor.html	Ketotifen fumarate (Zaditor) is a fumaric acid salt of ketotifen which is a H1-antihistamine and mast cell stabilizer.	Neuronal Signaling	C23H23NO5S	Fumarate	N/A	OC(=O)\C=C\C(O)=O.CN1CCC(CC1)=C1C2=C(SC=C2)C(=O)CC2=C1C=CC=C2 |c:19,25,28,30,t:16|	0.772	3	0	2
S2025	Urapidil HCl	423.94	64887-14-5	5-HT Receptor	http://www.selleckchem.com/products/urapidil-hydrochloride.html	Urapidil hydrochloride is a hydrochloride salt form of urapidil which is α1-adrenoceptor antagonist and 5-HT1A receptor agonist with pIC50 of 6.13 and 6.4 respectively.	Neuronal Signaling	C20H30ClN5O3	Hydrochloride	N/A	Cl.COC1=CC=CC=C1N1CCN(CCCNC2=CC(=O)N(C)C(=O)N2C)CC1 |c:4,6,t:2,17|	1.808	3	1	7
S2026	Ginkgolide A	408.4	15291-75-5	GABA Receptor	http://www.selleckchem.com/products/ginkgolide-a.html	Ginkgolide A is an extract from in Ginkgo biloba and a g-aminobutyric acid (GABA) antagonist with a Ki of 14.5 μM.	Neuronal Signaling	C20H24O9	Free Base	BN52020	[H][C@]12CC34[C@@]5([H])C[C@@H](C(C)(C)C)C33[C@@H](O)C(=O)O[C@H]3O[C@@]4(C(=O)O5)[C@@]1(O)[C@H](C)C(=O)O2 |r|	-0.022	7	1	1
S2028	Diclazuril	407.64	101831-37-2	Antifection	http://www.selleckchem.com/products/diclazuril.html	Diclazuril is an anti-coccidial drug.	Others	C17H9Cl3N4O2	Free Base	N/A	ClC1=CC=C(C=C1)C(C#N)C1=C(Cl)C=C(C=C1Cl)N1N=CC(=O)NC1=O |c:3,5,11,14,16,21,t:1|	4.191	3	1	3
S2029	Uridine	244.2	58-96-8	DNA/RNA Synthesis	http://www.selleckchem.com/products/uridine.html	Uridine is a nucleoside, contains a uracil attached to a ribose ring via a β-N1-glycosidic bond.	DNA Damage	C9H12N2O6	Free Base	N/A	OC[C@H]1O[C@H]([C@H](O)[C@@H]1O)N1C=CC(=O)NC1=O |r,c:11|	-2.451	3	4	2
S2030	Flunarizine 2HCl	477.42	30484-77-6	Calcium Channel	http://www.selleckchem.com/products/flunarizine-dihydrochloride.html	Flunarizine dihydrochloride is a dihydrochloride salt form which is a calcium channel blocker with a Ki of 68 nM.	Transmembrane Transporters	C26H28Cl2F2N2	2HCl	N/A	Cl.Cl.FC1=CC=C(C=C1)C(N1CCN(C\C=C\C2=CC=CC=C2)CC1)C1=CC=C(F)C=C1 |c:3,5,18,20,31,t:1,16,26,28|	6.699	0	0	6
S2031	Fenticonazole Nitrate	518.41	73151-29-8	Antifection	http://www.selleckchem.com/products/fenticonazole-nitrate.html	Fenticonazole nitrate is an azole antifungal agent.	Others	C24H21Cl2N3O4S	Nitrate	N/A	O[N+]([O-])=O.ClC1=CC=C(C(CN2C=CN=C2)OCC2=CC=C(SC3=CC=CC=C3)C=C2)C(Cl)=C1 |c:11,13,25,27,30,34,t:4,6,18,20,23|	5.176	2	0	8
S2032	Rebamipide	370.79	90098-04-7	Others	http://www.selleckchem.com/products/rebamipide.html	Rebamipide is a cholecystokinin type 1 (CCK1) receptor inhibitor for inhibiting [125I]BH-CCK-8S with IC50 of 37.7 μM.	Others	C19H15ClN2O4	Free Base	N/A	OC(=O)C(CC1=CC(=O)NC2=C1C=CC=C2)NC(=O)C1=CC=C(Cl)C=C1 |c:10,13,15,26,t:5,21,23|	2.606	3	2	5
S2035	Epalrestat	319.4	82159-09-9	Others	http://www.selleckchem.com/products/epalrestat.html	Epalrestat is an aldose reductase inhibitor with IC50 of 72 nM.	Others	C15H13NO3S2	Free Base	N/A	CC(\C=C1/SC(=S)N(CC(O)=O)C1=O)=C/C1=CC=CC=C1 |c:18,20,t:16|	3.442	2	0	4
S2036	Aspartame	294.3	22839-47-0	Others	http://www.selleckchem.com/products/aspartame.html	Aspartame is an artificial, non-saccharide sweetener used as a sugar substitute in some foods and beverages.	Others	C14H18N2O5	Free Base	Nutrasweet	COC(=O)[C@H](CC1=CC=CC=C1)NC(=O)[C@@H](N)CC(O)=O |r,c:8,10,t:6|	-2.455	4	2	8
S2037	Candesartan Cilexetil	610.66	145040-37-5	RAAS	http://www.selleckchem.com/products/Candesartan-cilexetil-Atacand.html	Candesartan Cilexetil is a specific nonpeptide Ang II receptor (ATR) antagonist and the prodrug of candesartan which is an ATR antagonist with an IC50 of 15 μg/kg	Endocrinology & Hormones	C33H34N6O6	Free Base	Atacand, Amias, Blopress, Ratacand, TCV 116, TCY 116	CCOC1=NC2=C(N1CC1=CC=C(C=C1)C1=C(C=CC=C1)C1=NN=NN1)C(=CC=C2)C(=O)OC(C)OC(=O)OC1CCCCC1 |c:5,12,14,19,21,26,30,32,t:3,10,17,24|	6.913	10	1	13
S2038	Phentolamine Mesylate	377.46	65-28-1	Adrenergic Receptor	http://www.selleckchem.com/products/phentolamine-mesilate.html	Phentolamine Mesylate is a nonselective alpha-adrenergic antagonist with IC50 of 0.1 μM.	Neuronal Signaling	C18H23N3O4S	Mesylate	Regitine	CS(O)(=O)=O.CC1=CC=C(C=C1)N(CC1=NCCN1)C1=CC(O)=CC=C1 |c:7,9,23,25,t:5,14,20|	2.555	1	2	4
S2040	Nimesulide	308.31	51803-78-2	COX	http://www.selleckchem.com/products/nimesulide.html	Nimesulide is a relatively COX-2 selective inhibitor with IC50 of 26 μM.	Neuronal Signaling	C13H12N2O5S	Free Base	N/A	CS(=O)(=O)NC1=C(OC2=CC=CC=C2)C=C(C=C1)[N+]([O-])=O |c:5,10,12,15,17,t:8|	2.195	3	1	5
S2041	Dyclonine HCl	325.87	536-43-6	Sodium Channel	http://www.selleckchem.com/products/dyclonine-hydrochloride.html	Dyclonine hydrochloride is a hydrochloride salt form of dyclonine which is an oral anaesthetic.	Others	C18H28ClNO2	Hydrochloride	N/A	Cl.CCCCOC1=CC=C(C=C1)C(=O)CCN1CCCCC1 |c:7,9,t:5|	4.435	2	0	8
S2042	Cyproterone Acetate	416.94	427-51-0	Androgen Receptor	http://www.selleckchem.com/products/cyproterone-acetate.html	Cyproterone acetate is an androgen receptor (AR) antagonist with IC50 of 7.1 nM, as well as a weak progesterone receptor agonist with weak pro-gestational and glucocorticoid activity.	Endocrinology & Hormones	C24H29ClO4	Free Base	N/A	[H][C@@]12CC[C@](OC(C)=O)(C(C)=O)[C@@]1(C)CC[C@@]1([H])[C@@]2([H])C=C(Cl)C2=CC(=O)[C@@H]3C[C@@H]3[C@]12C |r,t:22,25|	3.314	4	0	3
S2043	Memantine HCl	215.76	41100-52-1	AMPA Receptor-kainate Receptor-NMDA Receptor	http://www.selleckchem.com/products/memantine-hydrochloride-namenda.html	Memantine hydrochloride (Namenda) is a CYP2B6 and CYP2D6 inhibitor for recombinant CYP2B6 and CYP2D6 with Ki of 0.51 nM and 94.9 μM, respectively.	Neuronal Signaling	C12H22ClN	Hydrochloride	N/A	Cl.CC12CC3CC(C)(C1)CC(N)(C3)C2	2.289	0	1	0
S2044	Cyproheptadine HCl	323.86	969-33-5	Histamine Receptor	http://www.selleckchem.com/products/cyproheptadine-hydrochloride-periactin.html	Cyproheptadine hydrochloride (Periactin) is a hydrochloride salt form of cyproheptadine which is a histamine receptor antagonist for 5-HT2 receptor with IC50 of 0.6 nM.	Neuronal Signaling	C21H22ClN	Hydrochloride	N/A	Cl.CN1CCC(CC1)=C1C2=C(C=CC=C2)C=CC2=C1C=CC=C2 |c:11,13,16,18,21,23,t:9|	4.744	0	0	0
S2045	Doxifluridine	246.19	3094-09-5	Phosphorylase	http://www.selleckchem.com/products/doxifluridine.html	Doxifluridine is a thymidine phosphorylase activator for PC9-DPE2 cells with IC50 of 0.62 μM.	Others	C9H11FN2O5	Free Base	N/A	C[C@H]1O[C@H]([C@H](O)[C@@H]1O)N1C=C(F)C(=O)NC1=O |r,t:10|	-1.653	3	3	1
S2046	Pioglitazone HCl	392.9	112529-15-4	P450 (e.g. CYP17)	http://www.selleckchem.com/products/pioglitazone-hydrochloride-actos.html	Pioglitazone HCl is a hydrochloride salt form of pioglitazone which is a cytochrome P450 (CYP)2C8 and CYP3A4 enzymes inhibitor for CYP2C8, CYP3A4 and CYP2C9 with Ki of 1.7 μM, 11.8 μM and 32.1 μM, respectively.	Metabolism	C19H21ClN2O3S	Hydrochloride	N/A	Cl.CCC1=CC=C(CCOC2=CC=C(CC3SC(=O)NC3=O)C=C2)N=C1 |c:22,25,t:2,4,9,11|	4.289	4	1	7
S2047	Lornoxicam	371.82	70374-39-9	COX	http://www.selleckchem.com/products/lornoxicam-xefo.html	Lornoxicam is a COX-1 and COX-2 inhibitor with IC50 of 5 nM and 8 nM, respectively.	Neuronal Signaling	C13H10ClN3O4S2	Free Base	N/A	CN1C(C(=O)NC2=NC=CC=C2)=C(O)C2=C(C=C(Cl)S2)S1(=O)=O |c:8,10,t:6,12,15,17|	0.913	4	2	2
S2051	Captopril	217.29	62571-86-2	RAAS	http://www.selleckchem.com/products/captopril-capoten.html	Captopril is an angiotensin-converting enzyme (ACE) inhibitor with IC50 of 6 nM.	Endocrinology & Hormones	C9H15NO3S	Free Base	N/A	C[C@H](CS)C(=O)N1CCC[C@H]1C(O)=O |r|	0.667	2	0	3
S2052	Oxytetracycline Dihydrate	496.46	6153-64-6	Others	http://www.selleckchem.com/products/oxytetracycline-dihydrate.html	Oxytetracycline Dihydrate is a prescription antibiotic, interfering with the ability of bacteria to produce essential proteins.	Others	C22H28N2O11	Dihydrate	N/A	O.O.[H][C@@]12[C@@H](O)[C@@]3([H])C(C(=O)C4=C(O)C=CC=C4[C@@]3(C)O)=C(O)[C@]1(O)C(=O)C(C(N)=O)=C(O)[C@H]2N(C)C |r,c:9,12,14,t:20,31|	-2.309	3	5	2
S2053	Cytidine	243.22	65-46-3	Others	http://www.selleckchem.com/products/cytidine.html	Cytidine is a nucleoside molecule that is formed when cytosine is attached to a ribose ring, cytidine is a component of RNA.	Others	C9H13N3O5	Free Base	N/A	NC1=NC(=O)N(C=C1)[C@@H]1O[C@H](CO)[C@@H](O)[C@H]1O |r,c:6,t:1|	-2.396	3	4	2
S2054	Orphenadrine Citrate	461.5	4682-36-4	AChR	http://www.selleckchem.com/products/orphenadrine-citrate-norflex.html	Orphenadrine citrate is a skeletal muscle relaxant, it acts in the central nervous system to produce its muscle relaxant effects.	Neuronal Signaling	C24H31NO8	Citrate	N/A	OC(=O)CC(O)(CC(O)=O)C(O)=O.CN(C)CCOC(C1=CC=CC=C1)C1=CC=CC=C1C |c:21,23,28,30,t:19,26|	-0.483	4	0	11
S2055	Gimeracil	145.54	103766-25-2	Dehydrogenase	http://www.selleckchem.com/products/gimeracil.html	Gimeracil is an inhibitor of dihydropyrimidine dehydrogenase, which inhibits the early step in homologous recombination for double strand breaks repair.	Metabolism	C5H4ClNO2	Free Base	N/A	OC1=CC(=O)NC=C1Cl |c:6,t:1|	-0.493	1	2	0
S2057	Cyclophosphamide Monohydrate	279.1	6055-19-2	DNA alkylator	http://www.selleckchem.com/products/cyclophosphamide-monohydrate.html	Cyclophosphamide Monohydrate is a nitrogen mustard alkylating agent, it attaches the alkyl group to the guanine base of DNA.	Others	C7H17Cl2N2O3P	Monohydrate	N/A	O.ClCCN(CCCl)P1(=O)NCCCO1	-0.063	2	1	5
S2058	Tolnaftate	307.41	2398-96-1	Antifection	http://www.selleckchem.com/products/tolnaftate.html	Tolnaftate is a synthetic thiocarbamate used as an anti-fungal agent.	Others	C19H17NOS	Free Base	N/A	CN(C(=S)OC1=CC=C2C=CC=CC2=C1)C1=CC(C)=CC=C1 |c:9,11,14,20,22,t:5,7,17|	6.289	1	0	4
S2059	Terazosin HCl Dihydrate	459.92	70024-40-7	Adrenergic Receptor	http://www.selleckchem.com/products/terazosin-hydrochloride-hytrin.html	Hytrin (terazosin) is an alpha-adrenergic blocker used to treat high blood pressure and enlarged prostate.	Neuronal Signaling	C19H30ClN5O6	HCl & Dihydrate	N/A	O.O.Cl.COC1=CC2=C(C=C1OC)C(N)=NC(=N2)N1CCN(CC1)C(=O)C1CCCO1 |c:4,6,12,14,t:2|	1.348	6	1	4
S2060	Bromhexine HCl	412.59	611-75-6	Others	http://www.selleckchem.com/products/bromhexine-hydrochloride.html	Bromhexine hydrochloride is a medication prescribed for coughs which works by dissolving hard phlegm.	Others	C14H21Br2ClN2	HCl	N/A	Cl.CN(CC1=CC(Br)=CC(Br)=C1N)C1CCCCC1 |c:6,9,t:3|	4.894	0	1	3
S2061	Lovastatin	404.54	75330-75-5	HMG-CoA Reductase	http://www.selleckchem.com/products/lovastatin-mevacor.html	Lovastatin is an inhibitor of HMG-CoA reductase with IC50 of 3.4 nM, used for lowering cholesterol (hypolipidemic agent).	Metabolism	C24H36O5	Free Base	N/A	[H][C@]12[C@H](C[C@@H](C)C=C1C=C[C@H](C)[C@@H]2CC[C@@H]1C[C@@H](O)CC(=O)O1)OC(=O)[C@@H](C)CC |r,c:6,9|	4.218	4	1	7
S2062	Tiopronin	163.19	1953-02-2	ROS	http://www.selleckchem.com/products/tiopronin-thiola.html	Tiopronin is a US Food and Drug Administration (FDA)-approved drug for the treatment of cystinuria by controlling the rate of cystine precipitation and excretion.	Others	C5H9NO3S	Free Base	N/A	CC(S)C(=O)NCC(O)=O	-0.362	2	1	3
S2064	Balofloxacin	389.42	127294-70-6	Topoisomerase	http://www.selleckchem.com/products/balofloxacin.html	Balofloxacin is quinolone antibiotic, inhibiting the synthesis of bacterial DNA by interference with the enqyme DNA gyrase.	Others	C20H24FN3O4	Free Base	N/A	CNC1CCCN(C1)C1=C(OC)C2=C(C=C1F)C(=O)C(=CN2C1CC1)C(O)=O |c:9,13,15,21|	-0.615	3	1	5
S2065	Lafutidine	431.55	118288-08-7	Histamine Receptor	http://www.selleckchem.com/products/lafutidine.html	Lafutidine, a newly developed histamine H(2)-receptor antagonist, inhibits gastric acid secretion.	Neuronal Signaling	C22H29N3O4S	Free Base	N/A	O=C(CS(=O)CC1=CC=CO1)NC\C=C/COC1=CC(CN2CCCCC2)=CC=N1 |c:8,28,30,t:6,18|	1.987	5	1	11
S2066	Moxonidine	241.68	75438-57-2	Others	http://www.selleckchem.com/products/moxonidine.html	Moxonidine is a selective agonist at the imidazoline receptor subtype 1, used as antihypertensive agent.	Others	C9H12ClN5O	Free Base	N/A	COC1=NC(C)=NC(Cl)=C1NC1=NCCN1 |c:5,8,t:2,12|	0.598	4	2	3
S2067	Ozagrel HCl	264.71	78712-43-3	P450 (e.g. CYP17)	http://www.selleckchem.com/products/ozagrel-hydrochloride.html	Ozagrel HCl is a selective thromboxane A2 synthetase enzyme inhibitors with IC50 of 11 nM, used as antiasthmatic agent.	Others	C13H13ClN2O2	HCl	N/A	Cl.OC(=O)\C=C\C1=CC=C(CN2C=CN=C2)C=C1 |c:11,13,16,t:5,7|	1.986	2	0	4
S2069	Argatroban	508.63	74863-84-6	Thrombin	http://www.selleckchem.com/products/argatroban.html	Argatroban is an anticoagulant that is a small molecule direct thrombin inhibitor.	Others	C23H36N6O5S	Free Base	N/A	[H][C@@](CCCNC(N)=N)(NS(=O)(=O)C1=CC=CC2=C1NCC(C)C2)C(=O)N1CC[C@@H](C)C[C@@H]1C(O)=O |r,c:15,17,t:13|	1.266	4	4	10
S2074	Mecarbinate	233.26	15574-49-9	Others	http://www.selleckchem.com/products/mecarbinate.html	Mecarbinate is a chemical intermediate of arbidol hydrochloride.	Others	C13H15NO3	Free Base	N/A	CCOC(=O)C1=C(C)N(C)C2=CC=C(O)C=C12 |c:5,t:10,12,15|	2.437	2	1	3
S2075	Rosiglitazone HCl	393.89	302543-62-0	PPAR	http://www.selleckchem.com/products/rosiglitazone-hydrochloride.html	Rosiglitazone HCl is a blood glucose-lowering drugs, stimulating insulin secretion by binding to the PPAR receptors in fat cells.	Metabolism	C18H20ClN3O3S	HCl	N/A	Cl.CN(CCOC1=CC=C(CC2SC(=O)NC2=O)C=C1)C1=CC=CC=N1 |c:18,23,25,t:5,7,21|	3.65	4	1	7
S2077	Atorvastatin Calcium	1155.34	134523-03-8	HMG-CoA Reductase	http://www.selleckchem.com/products/atorvastatin-calcium-lipitor.html	Atorvastatin (Lipitor) is an inhibitor of HMG-CoA reductase used as a cholesterol-lowering medication that blocks the production of cholesterol.	Metabolism	C66H68CaF2N4O10	Calcium	N/A	[Ca++].CC(C)C1=C(C(=O)NC2=CC=CC=C2)C(=C(N1CC[C@@H](O)C[C@@H](O)CC([O-])=O)C1=CC=C(F)C=C1)C1=CC=CC=C1.CC(C)C1=C(C(=O)NC2=CC=CC=C2)C(=C(N1CC[C@@H](O)C[C@@H](O)CC([O-])=O)C1=CC=C(F)C=C1)C1=CC=CC=C1 |r,c:3,10,12,15,35,40,42,47,54,56,59,79,84,86,t:8,30,32,38,52,74,76,82|	8.163	2	6	24
S2078	Famotidine	337.45	76824-35-6	Histamine Receptor	http://www.selleckchem.com/products/famotidine-pepcid.html	Famotidine is a histamine H2–receptor antagonist with IC50 of 0.6 mM, commonly used to treat heartburn, GERD, ulcers, and other digestive conditions.	Neuronal Signaling	C8H15N7O2S3	Free Base	N/A	NC(=N)NC1=NC(CSCCC(=N)NS(N)(=O)=O)=CS1 |c:17,t:4|	-1.328	3	4	9
S2079	Moexipril HCl	535.03	82586-52-5	RAAS	http://www.selleckchem.com/products/moexipril-hydrochloride.html	Moexipril HCl is a potent orally active non-sulfhydryl angiotensin converting enzyme inhibitor (ACE) with IC50 of 0.041 μM, which is used for the treatment of hypertension and congestive heart failure.	Endocrinology & Hormones	C27H35ClN2O7	Hydrochloride	N/A	Cl.CCOC(=O)[C@H](CCC1=CC=CC=C1)N[C@@H](C)C(=O)N1CC2=CC(OC)=C(OC)C=C2C[C@H]1C(O)=O |r,c:10,12,30,t:8,22,26|	1.005	6	1	12
S2080	Clevidipine Butyrate	456.32	167221-71-8	Calcium Channel	http://www.selleckchem.com/products/cleviprex-clevidipine.html	Cleviprex (Clevidipine) is a dihydropyridine calcium channel blocker use as agent for the reduction of blood pressure.	Transmembrane Transporters	C21H23Cl2NO6	Free Base	N/A	CCCC(=O)OCOC(=O)C1=C(C)NC(C)=C(C1C1=CC=CC(Cl)=C1Cl)C(=O)OC |c:10,15,21,24,t:19|	4.145	6	1	10
S2081	Cilazapril Monohydrate	435.51	92077-78-6	RAAS	http://selleckchem.com/products/cilazapril-monohydrate-inhibace.html	Cilazapril Monohydrate is an angiotensin-converting enzyme (ACE) inhibitor used for the treatment of hypertension and congestive heart failure.	Endocrinology & Hormones	C22H33N3O6	Monohydrate	N/A	O.CCOC(=O)[C@H](CCC1=CC=CC=C1)N[C@H]1CCCN2CCC[C@H](N2C1=O)C(O)=O |r,c:10,12,t:8|	-0.922	4	1	9
S2082	Adiphenine HCl	347.88	50-42-0	AChR	http://www.selleckchem.com/products/adiphenine-hcl.html	Adiphenine is a nicotinic receptor inhibitor with IC50 of 15 µM, used as an antispasmodic drug.	Others	C20H26ClNO2	HCl	N/A	Cl.CCN(CC)CCOC(=O)C(C1=CC=CC=C1)C1=CC=CC=C1 |c:13,15,20,22,t:11,18|	4.433	2	0	9
S2084	Duloxetine HCl	333.88	136434-34-9	5-HT Receptor	http://www.selleckchem.com/products/duloxetine-hcl-cymbalta.html	Duloxetine is a serotonin-norepinephrine reuptake inhibitor with Ki of 4.6 nM, used for treatment of major depressive disorder and generalized anxiety disorder (GAD).	Neuronal Signaling	C18H20ClNOS	HCl	N/A	Cl.CNCC[C@H](OC1=C2C=CC=CC2=CC=C1)C1=CC=CS1 |r,c:6,8,10,13,15,20,t:18|	4.228	1	1	6
S2085	Trimebutine	387.47	39133-31-8	Opioid Receptor	http://www.selleckchem.com/products/trimebutine.html	Trimebutine is an agonist of peripheral mu, kappa and delta opiate receptors, used as spasmolytic agent for treatment of both acute and chronic abdominal pain.	Neuronal Signaling	C22H29NO5	Free Base	N/A	CCC(COC(=O)C1=CC(OC)=C(OC)C(OC)=C1)(N(C)C)C1=CC=CC=C1 |c:17,25,27,t:7,11,23|	4.115	5	0	10
S2086	Ivabradine HCl	505.05	148849-67-6	Adrenergic Receptor	http://www.selleckchem.com/products/ivabradine-hcl-procoralan.html	Ivabradine HCl, a new If inhibitor with IC 50 of 2.9 μM which acts specifically on the pacemaker activity of the sinoatrial node, is a pure heart rate lowering agent.	Neuronal Signaling	C27H37ClN2O5	HCl	N/A	Cl.COC1=CC2=C(CC(=O)N(CCCN(C)C[C@H]3CC4=CC(OC)=C(OC)C=C34)CC2)C=C1OC |r,c:33,t:2,4,18,22,26|	3.753	5	0	10
S2087	Rivastigmine Tartrate	400.42	129101-54-8	AChR	http://www.selleckchem.com/products/rivastigmine-tartrate-exelon.html	Rivastigmine Tartrate, a cholinesterase inhibitor with IC50 of 5.5 μM, ues as a parasympathomimetic or cholinergic agent for the treatment of mild to moderate Alzheimer disease.	Neuronal Signaling	C18H28N2O8	Tartrate	N/A	O[C@H]([C@@H](O)C(O)=O)C(O)=O.CCN(C)C(=O)OC1=CC=CC(=C1)[C@H](C)N(C)C |r,c:18,20,t:16|	-2.099	4	2	8
S2090	Dexmedetomidine HCl	236.74	145108-58-3	Adrenergic Receptor	http://www.selleckchem.com/products/dexmedetomidine-hcl-precedex.html	Dexmedetomidine is a highly selective and potent alpha-2 adrenoceptor agonist, which reduces anesthetic requirements for patients by providing significant sedation.	Neuronal Signaling	C13H17ClN2	HCl	N/A	Cl.C[C@H](C1=CN=CN1)C1=CC=CC(C)=C1C |r,c:4,10,13,t:2,8|	3.378	1	1	2
S2091	Betaxolol	307.43	659-18-7	Adrenergic Receptor	http://www.selleckchem.com/products/betaxolol-betoptic.html	Betaxolol is a selective beta1 adrenergic receptor blocker used in the treatment of hypertension and glaucoma.	Neuronal Signaling	C18H29NO3	Free Base	N/A	CC(C)NCC(O)COC1=CC=C(CCOCC2CC2)C=C1 |c:21,t:9,11|	2.577	2	2	11
S2092	Detomidine HCl	222.71	90038-01-0	Adrenergic Receptor	http://www.selleckchem.com/products/detomidine-hcl.html	Detomidine produce dose-dependent sedative and analgesic effects, mediatated by activation of α2 catecholamine receptors.	Neuronal Signaling	C12H15ClN2	HCl	N/A	Cl.CC1=C(C)C(CC2=CNC=N2)=CC=C1 |c:1,9,11,13,t:6|	3.053	1	1	2
S2096	Almotriptan Malate	469.55	181183-52-8	5-HT Receptor	http://www.selleckchem.com/products/almotriptan-malate-axert.html	Almotriptan Malate is a selective 5-hydroxytryptamine1B/1D (5-HT1B/1D) receptor agonist, used for the treatment of Migraine attacks in adults.	Neuronal Signaling	C21H31N3O7S	Malate	N/A	OC(CC(O)=O)C(O)=O.CN(C)CCC1=CNC2=CC=C(CS(=O)(=O)N3CCCC3)C=C12 |t:13,16,18,30|	-1.943	4	2	9
S2097	Ambrisentan	378.42	177036-94-1	Endothelin Receptor	http://www.selleckchem.com/products/ambrisentan.html	Ambrisentan, a highly selective antagonist of the endothelin-1 type A receptor with IC50 of 18 nM, is indicated for the treatment of pulmonary arterial hypertension (PAH).	Others	C22H22N2O4	Free Base	N/A	COC([C@H](OC1=NC(C)=CC(C)=N1)C(O)=O)(C1=CC=CC=C1)C1=CC=CC=C1 |r,c:8,11,19,21,26,28,t:5,17,24|	3.659	5	0	7
S2098	Bexarotene	348	153559-49-0	Retinoid Receptor	http://www.selleckchem.com/products/bexarotene.html	Bexarotene is a retinoid specifically selective for retinoid X receptors, used as an oral antineoplastic agent in the treatment of cutaneous T-cell lymphoma.	Others	C24H28O2	Free Base	N/A	CC1=CC2=C(C=C1C(=C)C1=CC=C(C=C1)C(O)=O)C(C)(C)CCC2(C)C |c:3,5,12,14,t:1,10|	6.405	1	0	3
S2099	Temocapril HCl	513.07	110221-44-8	RAAS	http://www.selleckchem.com/products/temocapril-hcl.html	Temocapril HCl is the hydrochloride of Temocapril, which is a long-acting angiotensin-converting enzyme (ACE) inhibitor, used for the treatment of hypertension.	Endocrinology & Hormones	C23H29ClN2O5S2	Hydrochloride	N/A	Cl.CCOC(=O)[C@H](CCC1=CC=CC=C1)N[C@H]1CS[C@@H](CN(CC(O)=O)C1=O)C1=CC=CS1 |r,c:10,12,31,t:8,29|	0.787	4	1	11
S2101	Gabexate Mesylate	417.48	56974-61-9	Serine Protease	http://www.selleckchem.com/products/gabexate-mesylate.html	Gabexate is a serine protease inhibitor with IC50 of 0.19 μM which is used therapeutically in the treatment of pancreatitis and disseminated intravascular coagulation.	Proteases	C17H27N3O7S	Mesylate	N/A	CS(O)(=O)=O.CCOC(=O)C1=CC=C(OC(=O)CCCCCNC(N)=N)C=C1 |c:25,t:9,11|	1.774	4	2	12
S2102	Rasagiline Mesylate	267.34	161735-79-1	MAO	http://www.selleckchem.com/products/rasagiline-mesylate.html	Rasagiline Mesylate is a new MAO-B inhibitor for the treatment of idiopathic Parkinson's disease.	Metabolism	C13H17NO3S	Mesylate	N/A	CS(O)(=O)=O.C#CCN[C@@H]1CCC2=CC=CC=C12 |r,c:13,t:11,15|	2.705	0	1	2
S2103	Naltrexone HCl	377.86	16676-29-2	Opioid Receptor	http://www.selleckchem.com/products/naltrexone-hcl.html	Naltrexone is an opioid receptor antagonist with IC50 of 8 nM used primarily in the management of alcohol dependence and opioid dependence.	Neuronal Signaling	C20H24ClNO4	Hydrochloride	N/A	Cl.OC1=CC=C2C[C@H]3N(CC4CC4)CC[C@@]45[C@@H](OC1=C24)C(=O)CC[C@@]35O |r,c:19,t:1,3|	2.039	2	1	2
S2104	Levosulpiride	341.43	23672-07-3	Dopamine Receptor	http://www.selleckchem.com/products/levosulpiride-levogastrol.html	Levosulpiride is a selective antagonist for D2 dopamine receptors used as an antipsychotic and prokinetic agent.	Neuronal Signaling	C15H23N3O4S	Free Base	N/A	CCN1CCC[C@H]1CNC(=O)C1=C(OC)C=CC(=C1)S(N)(=O)=O |r,c:12,16,18|	0.704	4	2	6
S2108	Flunixin Meglumin	491.46	42461-84-7	COX	http://www.selleckchem.com/products/flunixin-meglumin.html	Flunixin meglumine is a potent inhibitor of the enzyme cyclooxygenase used as analgesic agent with anti-inflammatory and antipyretic activity.	Neuronal Signaling	C21H28F3N3O7	Meglumin	N/A	CNC[C@H](O)[C@@H](O)[C@H](O)[C@H](O)CO.CC1=C(C=CC=C1NC1=NC=CC=C1C(O)=O)C(F)(F)F |r,c:15,17,23,25,t:13,21|	-1.676	2	7	10
S2109	Imidapril HCl	441.91	89371-37-9	RAAS	http://www.selleckchem.com/products/imidapril-tanatril.html	Imidapril HCl is a angiotensin-converting enzyme (ACE) inhibitor with IC50 of 2.6 nM, used for the treatment of hypertension.	Endocrinology & Hormones	C20H27N3O6	Hydrochloride	N/A	CCOC(=O)[C@H](CCC1=CC=CC=C1)N[C@@H](C)C(=O)N1[C@@H](CN(C)C1=O)C(O)=O |r,c:10,12,t:8|	-1.197	5	1	10
S2110	Vinpocetine	350.45	42971-09-5	Sodium Channel	http://selleckchem.com/products/vinpocetine-cavinton.html	Vinpocetine is a selective inhibitor of voltage-sensitive sodium channel for the treatment of stroke, vascular dementia and Alzheimer's disease.	Transmembrane Transporters	C22H26N2O2	Free Base	N/A	[H][C@]12N3CCC[C@@]1(CC)C=C(N1C4=CC=CC=C4C(CC3)=C21)C(=O)OCC |r,c:10,15,17,t:13,23|
S2111	Lapatinib	581.06	231277-92-2	EGFR,HER2	http://www.selleckchem.com/products/lapatinib.html	Lapatinib, used in the form of Lapatinib Ditosylate, is a potent EGFR and ErbB2 inhibitor with IC50 of 10.8 and 9.2 nM, respectively.	Protein Tyrosine Kinase	C29H26ClFN4O4S	Free Base	N/A	CS(=O)(=O)CCNCC1=CC=C(O1)C1=CC=C2N=CN=C(NC3=CC=C(OCC4=CC=CC(F)=C4)C(Cl)=C3)C2=C1 |c:10,18,31,34,38,42,t:8,14,16,20,23,25,29|	6.041	6	2	11
S2113	Cisatracurium Besylate	1243.48	96946-42-8	Adrenergic Receptor	http://www.selleckchem.com/products/cisatracurium-besylate-nimbex.html	Cisatracurium Besylate is a nondepolarizing neuromuscular blocking agent, antagonizing the action of acetylcholine by inhibiting neuromuscular transmission.	Neuronal Signaling	C65H82N2O18S2	Besylate	N/A	[O-]S(=O)(=O)C1=CC=CC=C1.[O-]S(=O)(=O)C1=CC=CC=C1.COC1=CC=C(C[C@@H]2C3=CC(OC)=C(OC)C=C3CC[N@+]2(C)CCC(=O)OCCCCCOC(=O)CC[N@@+]2(C)CCC3=CC(OC)=C(OC)C=C3[C@H]2CC2=CC=C(OC)C(OC)=C2)C=C1OC |r,c:6,8,16,18,36,71,85,88,t:4,14,22,24,28,32,63,67,77,79|	3.646	12	0	28
S2114	Dronedarone HCl	593.22	141625-93-6	Potassium Channel,Sodium Channel,Calcium Channel	http://www.selleckchem.com/products/dronedarone-hcl-multaq.html	Dronedarone HCl is a therapy for the treatment of patients with paroxysmal and persistent atrial fibrillation or atrial flutter.	Others	C31H45ClN2O5S	HCl	N/A	Cl.CCCCN(CCCC)CCCOC1=CC=C(C=C1)C(=O)C1=C(CCCC)OC2=CC=C(NS(C)(=O)=O)C=C12 |c:15,17,22,t:13,29,31,38|	7.397	5	1	18
S2116	Conivaptan HCl	535.04	168626-94-6	Vasopressin Receptor	http://www.selleckchem.com/products/conivaptan-hcl-vaprisol.html	Conivaptan is a non-peptide inhibitor of antidiuretic hormone (vasopressin receptor antagonist).	Others	C32H27ClN4O2	HCl	N/A	Cl.CC1=NC2=C(N1)C1=C(C=CC=C1)N(CC2)C(=O)C1=CC=C(NC(=O)C2=C(C=CC=C2)C2=CC=CC=C2)C=C1 |c:3,9,11,29,31,36,38,41,t:1,7,20,22,27,34|	5.68	3	2	4
S2118	Ibutilide Fumarate	885.23	122647-32-9	Sodium Channel	http://www.selleckchem.com/products/ibutilide-fumarate.html	Ibutilide Fumarate is a Class III antiarrhythmic agent that is indicated for acute cardioconversion of atrial fibrillation and atrial flutter of a recent onset to sinus rhythm by induction of slow inward sodium current, which prolongs action potential and refractory period of myocardial cells.	Transmembrane Transporters	C44H76N4O10S2	Fumarate	N/A	OC(=O)\C=C\C(O)=O.CCCCCCCN(CC)CCCC(O)C1=CC=C(NS(C)(=O)=O)C=C1.CCCCCCCN(CC)CCCC(O)C1=CC=C(NS(C)(=O)=O)C=C1 |c:31,57,t:22,24,48,50|	1.954	6	4	30
S2119	Probucol	516.84	23288-49-5	Others	http://www.selleckchem.com/products/probucol.html	Probucol is an anti-hyperlipidemic drug by lowering the level of cholesterol in the bloodstream by increasing the rate of LDL catabolism.	Others	C31H48O2S2	Free Base	N/A	CC(C)(SC1=CC(=C(O)C(=C1)C(C)(C)C)C(C)(C)C)SC1=CC(=C(O)C(=C1)C(C)(C)C)C(C)(C)C |c:9,26,t:4,6,21,23|	9.779	0	2	8
S2120	Arbidol HCl	513.88	131707-23-8	Antifection	http://www.selleckchem.com/products/Arbidol-hcl.html	Arbidol is an antiviral treatment for influenza infection.	Others	C22H26BrClN2O3S	Hydrochloride	N/A	Cl.CCOC(=O)C1=C(CSC2=CC=CC=C2)N(C)C2=CC(Br)=C(O)C(CN(C)C)=C12 |c:5,11,13,t:9,18,21,28|	5.698	2	1	8
S2121	Licofelone	379.88	156897-06-2	COX	http://www.selleckchem.com/products/licofelone.html	Licofelone is a dual COX/LOX inhibitor being considered as a treatment for osteoarthritis.	Neuronal Signaling	C23H22ClNO2	Free Base	N/A	CC1(C)CN2C(CC(O)=O)=C(C(=C2C1)C1=CC=CC=C1)C1=CC=C(Cl)C=C1 |c:9,11,18,20,28,t:16,23,25|	5.78	1	0	4
S2123	Dextrose	180.16	50-99-7	Others	http://www.selleckchem.com/products/Dextrose(D-glucose).html	Dextrose, a simple sugar (monosaccharide), is an important carbohydrate in biology.	Others	C6H12O6	Free Base	D-glucose, Grape sugar	OC[C@@H](O)[C@@H](O)[C@H](O)[C@@H](O)C=O |r|	-2.791	1	5	5
S2124	Xylose	150.13	25990-60-7	Others	http://www.selleckchem.com/products/Xylose.html	Xylose is a sugar first isolated from wood.	Others	C5H10O5	Free Base	N/A	OC[C@@H](O)[C@H](O)[C@@H](O)C=O |r|	-2.28	1	4	4
S2125	Mestranol	310.43	72-33-3	Estrogen/progestogen Receptor	http://www.selleckchem.com/products/Mestranol.html	Mestranol is the 3-methyl ether of ethinylestradiol. It was the estrogen used in many of the first oral contraceptives.	Others	C21H26O2	Free Base	N/A	[H][C@@]12CC[C@@](O)(C#C)[C@@]1(C)CC[C@]1([H])C3=C(CC[C@@]21[H])C=C(OC)C=C3 |r,c:15,27,t:23|	5.112	1	0	1
S2126	Naftopidil	392.49	57149-07-2	Adrenergic Receptor	http://www.selleckchem.com/products/Naftopidil(Flivas).html	Naftopidil (Flivas) is a selective α1-adrenergic receptor antagonist or alpha blocker with a Ki of 58.3 nM.	Neuronal Signaling	C24H28N2O3	Free Base	KT-611, BM-15275	COC1=CC=CC=C1N1CCN(CC(O)COC2=C3C=CC=CC3=CC=C2)CC1 |c:4,6,18,20,22,25,27,t:2|	3.962	2	1	7
S2127	S- (+)-Rolipram	275.34	85416-73-5	PDE	http://www.selleckchem.com/products/sRolipram.html	S-(+)-Rolipram inhibits human monocyte cyclic AMP-specific PDE4 with IC50 of 0.75 μM, has anti-inflammatory and anti-depressant activity in the central nervous system, less potent than its R enantiomer.	Metabolism	C16H21NO3	Free Base	N/A	COC1=C(OC2CCCC2)C=C(C=C1)[C@H]1CNC(=O)C1 |r,c:2,11,13|	2.349	3	1	4
S2128	Bazedoxifene HCl	507.06	198480-56-7	Estrogen/progestogen Receptor	http://www.selleckchem.com/products/bazedoxifene-hcl.html	Bazedoxifene HCl is a novel, non-steroidal, indole-based estrogen receptor modulator (SERM) binding to both ERα and ERβ with IC50 of 23 nM and 89 nM.	Endocrinology & Hormones	C30H35ClN2O3	Hydrochloride	PF-05208749 HCl	Cl.CC1=C(N(CC2=CC=C(OCCN3CCCCCC3)C=C2)C2=CC=C(O)C=C12)C1=CC=C(O)C=C1 |c:20,37,t:1,5,7,23,25,28,32,34|	7.602	1	2	7
S2130	Atropine sulfate monohydrate	694.83	5908-99-6	AChR	http://www.selleckchem.com/products/Atropine-sulfate-monohydrate.html	Atropine sulfate monohydrate is a competitive muscarinic acetylcholine receptor antagonist with an IC50 of 2.5 nM.	Neuronal Signaling	C34H50N2O11S	Sulfate monohydrate	N/A	O.OS(O)(=O)=O.[H][C@]12CC[C@]([H])(C[C@@H](C1)OC(=O)C(CO)C1=CC=CC=C1)N2C.[H][C@]12CC[C@]([H])(C[C@@H](C1)OC(=O)C(CO)C1=CC=CC=C1)N2C |r,c:22,24,47,49,t:20,45|	2.628	4	2	10
S2131	Roflumilast	403.21	162401-32-3	PDE	http://www.selleckchem.com/products/Roflumilast(Daxas).html	Roflumilast is a selective inhibitor of PDE4 with IC50 of 0.2-4.3 nM.	Metabolism	C17H14Cl2F2N2O3	Free Base	Daxas	FC(F)OC1=CC=C(C=C1OCC1CC1)C(=O)NC1=C(Cl)C=NC=C1Cl |c:6,8,20,23,25,t:4|	4.402	4	1	7
S2134	AZD8330	461.23	869357-68-6	MEK	http://www.selleckchem.com/products/AZD8330(ARRY-424704).html	AZD8330 is a novel, selective, non-ATP competitive MEK 1/2 inhibitor with IC50 of 7 nM. Phase 1.	MAPK	C16H17FIN3O4	Free Base	N/A	CN1C(=O)C(C)=CC(C(=O)NOCCO)=C1NC1=C(F)C=C(I)C=C1 |c:5,14,18,24,t:21|	1.653	3	3	6
S2149	GSK1292263	456.56	1032823-75-8	GPR	http://www.selleckchem.com/products/GSK1292263.html	GSK1292263 is a novel GPR119 agonist, showing potential for the treatment of type 2 diabetes. Phase 2.	Endocrinology & Hormones	C23H28N4O4S	Free Base	N/A	CC(C)C1=NOC(=N1)N1CCC(COC2=CN=C(C=C2)C2=CC=C(C=C2)S(C)(=O)=O)CC1 |c:6,17,19,24,26,t:3,15,22|	3.893	7	0	7
S2150	Neratinib (HKI-272)	557.04	698387-09-6	EGFR,HER2	http://selleckchem.com/products/Neratinib(HKI-272).html	Neratinib (HKI-272) is a highly selective HER2 and EGFR inhibitor with IC50 of 59 nM and 92 nM in cell-free assays; weakly inhibits KDR and Src, no significant inhibition to Akt, CDK1/2/4, IKK-2, MK-2, PDK1, c-Raf and c-Met. Phase 3.	Protein Tyrosine Kinase	C30H29ClN6O3	Free Base	N/A	CCOC1=C(NC(=O)\C=C\CN(C)C)C=C2C(=C1)N=CC(C#N)=C2NC1=CC=C(OCC2=NC=CC=C2)C(Cl)=C1 |c:3,14,16,19,23,35,37,41,t:27,29,33|	4.881	5	2	11
S2151	Erismodegib (NVP-LDE225)	485.5	956697-53-3	Hedgehog/Smoothened	http://www.selleckchem.com/products/LDE225(NVP-LDE225).html	LDE225 (NVP-LDE225) is a Smoothened (Smo) antagonist, inhibiting Hedgehog (Hh) signaling with IC50 of 1.3 nM (mouse) and 2.5 nM (human), respectively. Phase 3.	Stem Cells & Wnt	C26H26F3N3O3	Free Base	N/A	C[C@H]1CN(C[C@@H](C)O1)C1=CC=C(NC(=O)C2=C(C)C(=CC=C2)C2=CC=C(OC(F)(F)F)C=C2)C=N1 |r,c:16,19,21,33,36,t:9,11,24,26|	6.732	4	1	6
S2152	Sitafloxacin Hydrate	436.84	163253-35-8	Antifection	http://www.selleckchem.com/products/Sitafloxacin(DU-6859A).html	Sitafloxacin Hydrate is a new-generation, broad-spectrum oral fluoroquinolone antibiotic.	Others	C19H18ClF2N3O3R	1.5 hydrate	DU 6859A, DU 6859, DU-6859, LS-184401	[*].N[C@@H]1CN(CC11CC1)C1=C(Cl)C2=C(C=C1F)C(=O)C(=CN2[C@@H]1C[C@@H]1F)C(O)=O |r,$1.5H2O_R0;;;;;;;;;;;;;;;;;;;;;;;;;;;;$,c:10,13,15,21|	0.344	2	1	3
S2153	CGS 21680 HCl	535.98	124431-80-7	Adenosine Receptor	http://www.selleckchem.com/products/CGS-21680-hydrochloride.html	CGS 21680 HCl is an adenosine A2 receptor agonist with IC50 of 22 nM, exhibits 140-fold over A1 receptor.	Angiogenesis	C23H30ClN7O6	Hydrochloride	N/A	Cl.CCNC(=O)[C@H]1O[C@H]([C@H](O)[C@@H]1O)N1C=NC2=C1N=C(NCCC1=CC=C(CCC(O)=O)C=C1)N=C2N |r,c:14,16,33,36,t:19,24,26|	0.911	6	5	10
S2154	Dabigatran Etexilate	627.73	211915-06-9	Thrombin	http://www.selleckchem.com/products/BIBR-1048(Dabigatran-etexilate).html	Dabigatran Etexilate is the prodrug of dabigatran, a potent, nonpeptidic small molecule that specifically and reversibly inhibits both free and clot-bound thrombin by binding to the active site of the thrombin molecule.	Others	C34H41N7O5	Free Base	N/A	CCCCCCOC(=O)\N=C(\N)C1=CC=C(NCC2=NC3=C(C=CC(=C3)C(=O)N(CCC(=O)OCC)C3=CC=CC=N3)N2C)C=C1 |c:22,24,39,41,47,t:12,14,18,20,37|	5.751	8	2	17
S2155	LY2608204	559.81	1234703-40-2	Others	http://selleckchem.com/products/ly2608204.html	LY2608204 activates glucokinase (GK) with EC50 of 42 nM. Phase 2.	Others	C28H37N3O3S3	Free Base	N/A	O=C(NC1=NC=C(SCCN2CCCC2)S1)[C@@]1(C[C@H]1C1CCCCC1)C1=CC=C(C=C1)S(=O)(=O)C1CC1 |r,c:31,33,t:3,5,29|	5.393	4	1	10
S2156	LY2886721	390.41	1262036-50-9	BACE	http://www.selleckchem.com/products/LY-2886721.html	LY2886721 is an BACE inhibitor used for the treatment of Alzheimer's Disease.	Others	C18H16F2N4O2S	Free Base	N/A	[H][C@@]12COC[C@@]1(N=C(N)SC2)C1=CC(NC(=O)C2=NC=C(F)C=C2)=CC=C1F |r,c:24,26,28,t:7,13,19,21|	2.134	4	2	3
S2157	Taladegib (LY2940680)	512.5	1258861-20-9	Hedgehog,Hedgehog/Smoothened	http://selleckchem.com/products/ly2940680.html	Taladegib (LY2940680) binds to the Smoothened (Smo) receptor and potently inhibits Hedgehog (Hh) signaling. Phase 1/2.	Stem Cells & Wnt	C26H24F4N6O	Free Base	N/A	CN(C1CCN(CC1)C1=NN=C(C2=CC=NN2C)C2=C1C=CC=C2)C(=O)C1=C(C=C(F)C=C1)C(F)(F)F |c:15,20,23,25,35,t:9,11,13,30,32|
S2158	KW-2449	332.4	1000669-72-6	Aurora Kinase,Bcr-Abl,FLT3	http://www.selleckchem.com/products/KW-2449.html	KW-2449 is a multiple-targeted inhibitor, mostly for Flt3 with IC50 of 6.6 nM, modestly potent to FGFR1, Bcr-Abl and Aurora A; little effect on PDGFRβ, IGF-1R, EGFR. Phase 1.	Angiogenesis	C20H20N4O	Free Base	N/A	O=C(N1CCNCC1)C1=CC=C(\C=C\C2=NNC3=C2C=CC=C3)C=C1 |c:18,21,23,26,t:9,11,15|	2.723	2	2	3
S2159	Tebipenem Pivoxil	497.63	161715-24-8	Antifection	http://www.selleckchem.com/products/Tebipenem-pivoxil(L-084).html	Tebipenem pivoxil is a novel oral carbapenem antibiotic with an IC50 of 100 μg/ml for human CYP isoforms	Others	C22H31N3O6S2	Free Base	L-084, TBPM-PI, ME1211	[H][C@]12[C@@H](C)C(SC3CN(C3)C3=NCCS3)=C(N1C(=O)[C@]2([H])[C@@H](C)O)C(=O)OCOC(=O)C(C)(C)C |r,c:16,t:11|	1.782	6	1	10
S2160	Almorexant HCl	549.02	913358-93-7	OX Receptor	http://www.selleckchem.com/products/almorexant-hcl.html	Almorexant HCl is an orally active, dual orexin receptor antagonist with IC50 of 6.6 nM and 3.4 nM for OX1 and OX2 receptor, respectively. Phase 3.	GPCR & G Protein	C29H32ClF3N2O3	Hydrochloride	N/A	Cl.CNC(=O)[C@H](N1CCC2=C(C=C(OC)C(OC)=C2)[C@@H]1CCC1=CC=C(C=C1)C(F)(F)F)C1=CC=CC=C1 |r,c:16,25,27,36,38,t:8,10,23,34|	6.438	3	1	9
S2161	RAF265 (CHIR-265)	518.41	927880-90-8	Raf,VEGFR	http://www.selleckchem.com/products/RAF265(CHIR-265).html	RAF265 (CHIR-265) is a potent selective inhibitor of C-Raf/B-Raf/B-Raf V600E with IC50 of 3-60 nM, and exhibits potent inhibition on VEGFR2 phosphorylation with EC50 of 30 nM. Phase 2.	MAPK	C24H16F6N6O	Free Base	N/A	CN1C(NC2=CC=C(C=C2)C(F)(F)F)=NC2=C1C=CC(OC1=CC=NC(=C1)C1=NC=C(N1)C(F)(F)F)=C2 |c:6,8,14,16,19,25,27,32,39,t:4,23,30|	6.469	4	2	7
S2162	AZD1480	348.77	935666-88-9, 1260222-79-4 (TFA)	JAK	http://www.selleckchem.com/products/AZD1480.html	AZD1480 is a novel ATP-competitive JAK2 inhibitor with IC50 of 0.26 nM, selectivity against JAK3 and Tyk2, and to a smaller extent against JAK1. Phase 1.	JAK/STAT	C14H14ClFN8	Free Base	N/A	C[C@H](NC1=NC=C(Cl)C(NC2=NNC(C)=C2)=N1)C1=NC=C(F)C=N1 |r,c:14,16,24,t:3,5,10,19,21|	2.645	5	3	5
S2163	PF-4708671	390.41	1255517-76-0	S6 Kinase	http://www.selleckchem.com/products/pf-4708671.html	PF-4708671 is a cell-permeable inhibitor of p70 ribosomal S6 kinase (S6K1 isoform) with Ki/IC50 of 20 nM/160 nM, 400-fold greater selectivity for S6K1 than S6K2, and 4- and >20-fold selectivity for S6K1 than MSK1 and RSK1/2, respectively. First S6K1-specific inhibitor to be reported.	PI3K/Akt/mTOR	C19H21F3N6	Free Base	PF-04708671	CCC1=CN=CN=C1N1CCN(CC2=NC3=C(N2)C=CC(=C3)C(F)(F)F)CC1 |c:4,6,16,20,22,t:2,14|	3.886	3	1	5
S2167	Bazedoxifene Acetate	530.65	198481-33-3	Estrogen/progestogen Receptor	http://www.selleckchem.com/products/Bazedoxifene-acetate.html	Bazedoxifene Acetate is a third generation selective estrogen receptor modulator (SERM).	Endocrinology & Hormones	C32H38N2O5	Acetate	N/A	CC(O)=O.CC1=C(N(CC2=CC=C(OCCN3CCCCCC3)C=C2)C2=CC=C(O)C=C12)C1=CC=C(O)C=C1 |c:23,40,t:4,8,10,26,28,31,35,37|	3.981	2	2	7
S2168	PD128907 HCl	285.77	112960-16-4	Dopamine Receptor	http://www.selleckchem.com/products/PD-128907.html	PD 128907 HCl is a potent and selective dopamine D3 receptor agonist, with EC50 of 0.64 nM, exhibits 53-fold selectivity over dopamine D2 receptor.	Neuronal Signaling	C14H20ClNO3	Hydrochloride	PD128907	Cl.[H][C@]12COC3=CC=C(O)C=C3[C@]1([H])OCCN2CCC |r,c:9,t:4,6|	2.463	2	1	2
S2169	Rosuvastatin Calcium	500.57	147098-20-2	HMG-CoA Reductase	http://www.selleckchem.com/products/Rosuvastatin-calcium(Crestor).html	Rosuvastatin Calcium is a competitive inhibitor of HMG-CoA reductase with IC50 of 11 nM.	Endocrinology & Hormones	C44H54CaF2N6O12S2	Calcium salt	ZD4522	[Ca++].CC(C)C1=C(\C=C\[C@@H](O)C[C@@H](O)CC([O-])=O)C(=NC(=N1)N(C)S(C)(=O)=O)C1=CC=C(F)C=C1.CC(C)C1=C(\C=C\[C@@H](O)C[C@@H](O)CC([O-])=O)C(=NC(=N1)N(C)S(C)(=O)=O)C1=CC=C(F)C=C1 |r,c:3,16,18,32,37,50,52,66,t:27,29,61,63|	1.906	8	4	20
S2170	Givinostat (ITF2357)	475.97	732302-99-7	HDAC	http://www.selleckchem.com/products/ITF2357(Givinostat).html	Givinostat (ITF2357) is a potent HDAC inhibitor for HDAC2, HDAC1B and HDAC1A with IC50 of 10 nM, 7.5 nM and 16 nM. Phase 1/2.	Cytoskeletal Signaling	C24H30ClN3O5	Chloride	N/A	O.Cl.CCN(CC)CC1=CC2=C(C=C1)C=C(COC(=O)NC1=CC=C(C=C1)C(=O)NO)C=C2 |c:8,10,22,24,31,t:6,13,20|	4.046	3	2	9
S2173	Telotristat Etiprate (LX 1606 Hippurate)	754.15	11137608-69-5	Hydroxylase	http://www.selleckchem.com/products/telotristat-etiprate-lx-1606-hippurate.html	Telotristat Etiprate (LX 1606 Hippurate) is an orally bioavailable, tryptophan hydroxylase (TPH) inhibitor with potential antiserotonergic activity. Phase 3.	Metabolism	C36H35ClF3N7O6	Hippuric acid	Telotristat Etiprate	OC(=O)CNC(=O)C1=CC=CC=C1.CCOC(=O)[C@@H](N)CC1=CC=C(C=C1)C1=CC(O[C@H](C2=CC=C(Cl)C=C2N2C=CC(C)=N2)C(F)(F)F)=NC(N)=N1 |r,c:9,11,23,25,38,42,45,51,54,t:7,21,28,33,35|	3.747	8	3	14
S2177	Dichlorphenamide	305.16	120-97-8	Carbonic Anhydrase	http://selleckchem.com/products/Dichlorphenamide(Diclofenamide).html	Dichlorphenamide is a sulfonamide and a carbonic anhydrase inhibitor of the meta-Disulfamoylbenzene class.	Metabolism	C6H6Cl2N2O4S2	Free Base	Diclofenamide	NS(=O)(=O)C1=CC(Cl)=C(Cl)C(=C1)S(N)(=O)=O |c:10,t:4,7|	0.569	4	2	2
S2178	AG-14361	320.39	328543-09-5	PARP	http://www.selleckchem.com/products/AG14361.html	AG14361 is a potent inhibitor of PARP1 with Ki of <5 nM. It is at least 1000-fold more potent than the benzamides.	DNA Damage	C19H20N4O	Free Base	N/A	CN(C)CC1=CC=C(C=C1)C1=NC2=CC=CC3=C2N1CCNC3=O |c:6,8,15,17,t:4,11,13|	2.576	2	1	3
S2179	Gandotinib (LY2784544)	469.94	1229236-86-5	JAK	http://www.selleckchem.com/products/LY2784544.html	LY2784544 is a potent JAK2 inhibitor with IC50 of 3 nM, effective in JAK2V617F, 8- and 20-fold selective versus JAK1 and JAK3. Phase 2.	JAK/STAT	C23H25ClFN7O	Free Base	N/A	CC1=NNC(NC2=NN3C(CC4=CC=C(Cl)C=C4F)=C(C)N=C3C(CN3CCOCC3)=C2)=C1 |c:16,22,33,35,t:1,6,11,13,19|	3.938	4	2	6
S2180	Ixazomib (MLN2238)	361.03	1072833-77-2	Proteasome	http://www.selleckchem.com/products/MLN-2238.html	MLN2238 inhibits the chymotrypsin-like proteolytic (β5) site of the 20S proteasome with IC50 and Ki of 3.4 nM and 0.93 nM, respectively, also inhibits the caspase-like (β1) and trypsin-like (β2) proteolytic sites, with IC50 of 31 and 3500 nM.	Proteases	C14H19BCl2N2O4	Free Base	N/A	CC(C)C[C@H](NC(=O)CNC(=O)C1=C(Cl)C=CC(Cl)=C1)B(O)O |r,c:12,15,18|	3.344	2	2	7
S2181	MLN9708	517.12	1201902-80-8	Proteasome	http://www.selleckchem.com/products/MLN9708.html	MLN9708 immediately hydrolyzed to MLN2238, the biologically active form, on exposure to aqueous solutions or plasma. MLN2238 inhibits the chymotrypsin-like proteolytic (β5) site of the 20S proteasome with IC50/Ki of 3.4 nM/0.93 nM, less potent to β1 and little activity to β2. Phase 3.	Proteases	C20H23BCl2N2O9	Free Base	N/A	CC(C)C[C@H](NC(=O)CNC(=O)C1=C(Cl)C=CC(Cl)=C1)B1OC(=O)CC(CC(O)=O)(O1)C(O)=O |r,c:12,15,18|	3.497	7	2	10
S2182	SB743921 HCl	553.52	940929-33-9	Kinesin	http://selleckchem.com/products/SB-743921.html	SB743921 is a kinesin spindle protein (KSP) inhibitor with Ki of 0.1 nM, almost no affinity to MKLP1, Kin2, Kif1A, Kif15, KHC, Kif4 and CENP-E. Phase 1/2.	Cytoskeletal Signaling	C31H34Cl2N2O3	Hydrochloride	N/A	Cl.CC(C)[C@@H](N(CCCN)C(=O)C1=CC=C(C)C=C1)C1=C(CC2=CC=CC=C2)C(=O)C2=C(O1)C=C(Cl)C=C2 |r,c:16,19,24,26,31,38,t:11,13,22,35|	6.536	3	1	9
S2185	AST-1306	621.08	1050500-29-2	EGFR	http://www.selleckchem.com/products/ast-1306.html	AST-1306 is a novel irreversible inhibitor of EGFR and ErbB2 with IC50 of 0.5 nM and 3 nM, also effective in mutation EGFR T790M/L858R, more potent to ErbB2-overexpressing cells, 3000-fold selective for ErbB family than other kinases,	Protein Tyrosine Kinase	C31H26ClFN4O5S	Mesylate	N/A	CC1=CC=C(C=C1)S(O)(=O)=O.FC1=CC(COC2=CC=C(NC3=C4C=C(NC(=O)C=C)C=CC4=NC=N3)C=C2Cl)=CC=C1 |c:3,5,22,31,34,36,39,42,44,t:1,12,17,19,24|	7.381	4	2	8
S2186	SB505124	335.4	694433-59-5	TGF-beta/Smad	http://www.selleckchem.com/products/sb-505124.html	SB505124 is a selective inhibitor of TGFβR for ALK4, ALK5 with IC50 of 129 nM and 47 nM, respectively, also inhibits ALK7, but does not inhibit ALK1, 2, 3, or 6.	TGF-beta/Smad	C20H21N3O2	Free Base	N/A	CC1=CC=CC(=N1)C1=C(N=C(N1)C(C)(C)C)C1=CC2=C(OCO2)C=C1 |c:3,5,10,26,t:1,8,18,20|	4.609	4	1	3
S2187	Avasimibe	501.72	166518-60-1	P450 (e.g. CYP17)	http://www.selleckchem.com/products/Avasimibe(CI-1011).html	Avasimibe inhibits ACAT with IC50 of 3.3 μM, also inhibits human P450 isoenzymes CYP2C9, CYP1A2 and CYP2C19 with IC50 of 2.9 μM, 13.9 μM and 26.5 μM,	Metabolism	C29H43NO4S	Free Base	CI-1011	CC(C)C1=CC(C(C)C)=C(CC(=O)NS(=O)(=O)OC2=C(C=CC=C2C(C)C)C(C)C)C(=C1)C(C)C |c:20,22,31,t:3,8,18|	8.227	2	1	10
S2192	Sapitinib (AZD8931)	473.93	848942-61-0	EGFR,HER2	http://www.selleckchem.com/products/AZD8931.html	AZD8931 is a reversible, ATP competitive inhibitor of EGFR, ErbB2 and ErbB3 with IC50 of 4 nM, 3 nM and 4 nM, more potent than Gefitinib or Lapatinib against NSCLC cell, 100-fold more selective for the ErbB family than MNK1 and Flt. Phase 1/2.	Protein Tyrosine Kinase	C23H25ClFN5O3	Free Base	N/A	CNC(=O)CN1CCC(CC1)OC1=C(OC)C=C2N=CN=C(NC3=C(F)C(Cl)=CC=C3)C2=C1 |c:13,19,24,28,30,34,t:17,21|	3.485	5	2	7
S2193	GSK461364	543.6	929095-18-1	PLK	http://www.selleckchem.com/products/GSK461364.html	GSK461364 inhibits purified Plk1 with Ki of 2.2 nM. It is more than 1000-fold selective against Plk2/3. Phase 1.	Cell Cycle	C27H28F3N5O2S	Free Base	N/A	C[C@@H](OC1=C(SC(=C1)N1C=NC2=C1C=C(CN1CCN(C)CC1)C=C2)C(N)=O)C1=CC=CC=C1C(F)(F)F |r,c:6,10,12,26,34,36,t:3,15,32|	5.125	3	1	8
S2194	R406	628.63	841290-81-1	FLT3,Syk	http://www.selleckchem.com/products/R406.html	R406 is a potent Syk inhibitor with IC50 of 41 nM, strongly inhibits Syk but not Lyn, 5-fold less potent to Flt3. Phase 2.	Angiogenesis	C28H29FN6O8S	Besylate	N/A	OS(=O)(=O)C1=CC=CC=C1.COC1=CC(NC2=NC(NC3=NC4=C(OC(C)(C)C(=O)N4)C=C3)=C(F)C=N2)=CC(OC)=C1OC |c:6,8,32,37,39,43,t:4,12,16,20,22,34|	5.044	8	3	8
S2195	Lexibulin (CYT997)	434.53	917111-44-5	Microtubule Associated	http://www.selleckchem.com/products/CYT997.html	CYT997 (Lexibulin) is a potent microtubule polymerization inhibitor with IC50 of 10-100 nM in cancer cell lines. Phase 2.	Cytoskeletal Signaling	C24H30N6O2	Free Base	N/A	CCC[C@H](NC1=C(C)C=NC(=N1)C1=CC(OC)=C(NC(=O)NCC)C=C1)C1=CC=CN=C1 |r,c:5,8,10,25,30,32,t:13,17,28|	3.744	5	3	9
S2197	A-966492	324.35	934162-61-5	PARP	http://www.selleckchem.com/products/A-966492.html	A-966492 is a novel and potent inhibitor of <b>PARP1</b> and <b>PARP2</b> with <b>K<sub>i</sub></b> of 1 nM and 1.5 nM, respectively.	DNA Damage	C18H17FN4O	Free Base	N/A	NC(=O)C1=C2NC(=NC2=CC=C1)C1=CC=C(C=C1F)[C@@H]1CCCN1 |r,c:3,6,9,11,16,18,t:14|	2.505	2	3	3
S2198	SGI-1776 free base	405.42	1025065-69-3	Pim	http://www.selleckchem.com/products/SGI-1776.html	SGI-1776 is a novel ATP competitive inhibitor of Pim1 with IC50 of 7 nM, 50- and 10-fold selective versus Pim2 and Pim3, also potent to Flt3 and haspin. Phase 1.	JAK/STAT	C20H22F3N5O	Free Base	N/A	CN1CCC(CNC2=NN3C(C=C2)=NC=C3C2=CC=CC(OC(F)(F)F)=C2)CC1 |c:11,13,15,20,27,t:7,18|	5.206	3	1	6
S2199	Aliskiren Hemifumarate	609.83	173334-58-2	RAAS	http://www.selleckchem.com/products/Aliskiren-hemifumarate.html	Aliskiren hemifumarate is a direct renin inhibitor with IC50 of 1.5 nM.	Endocrinology & Hormones	C64H110N6O16	fumarate salt	N/A	OC(=O)\C=C\C(O)=O.COCCCOC1=C(OC)C=CC(C[C@@H](C[C@H](N)[C@@H](O)C[C@@H](C(C)C)C(=O)NCC(C)(C)C(N)=O)C(C)C)=C1.COCCCOC1=C(OC)C=CC(C[C@@H](C[C@H](N)[C@@H](O)C[C@@H](C(C)C)C(=O)NCC(C)(C)C(N)=O)C(C)C)=C1 |r,c:13,17,44,52,56,83|	1.735	12	8	40
S2201	BMS-794833	468.84	1174046-72-0	c-Met,VEGFR	http://www.selleckchem.com/products/BMS-794833.html	BMS-794833 is a potent ATP competitive inhibitor of Met/VEGFR2 with IC50 of 1.7 nM/15 nM, also inhibits Ron, Axl and Flt3 with IC50 of <3 nM; a prodrug of BMS-817378. Phase 1.	Protein Tyrosine Kinase	C23H15ClF2N4O3	Free Base	BMS794833	NC1=NC=CC(OC2=CC=C(NC(=O)C3=CNC=C(C3=O)C3=CC=C(F)C=C3)C=C2F)=C1Cl |c:3,17,27,30,33,t:1,7,9,14,22,24|	2.85	4	3	5
S2202	NVP-BHG712	503.48	940310-85-0	Bcr-Abl,Ephrin receptor,Raf,Src	http://www.selleckchem.com/products/NVP-BHG712.html	NVP-BHG712 is a specific EphB4 inhibitor with ED50 of 25 nM that discriminates between VEGFR and EphB4 inhibition; also shows activity against c-Raf, c-Src and c-Abl with IC50 of 0.395 μM, 1.266 μM and 1.667 μM, respectively.	Protein Tyrosine Kinase	C26H20F3N7O	Free Base	N/A	CN1N=CC2=C1N=C(N=C2NC1=CC(=CC=C1C)C(=O)NC1=CC=CC(=C1)C(F)(F)F)C1=CC=CN=C1 |c:2,4,7,9,15,17,26,28,37,39,t:13,24,35|	4.871	5	2	6
S2205	OSI-420	415.87	183320-51-6	EGFR	http://www.selleckchem.com/products/OSI-420-Desmethyl-Erlotinib,CP-473420.html	OSI-420 is the active metabolite of Erlotinib (EGFR inhibitor with IC50 of 2 nM).	Protein Tyrosine Kinase	C21H22ClN3O4	Hydrochloride	CP-473420	Cl.COCCOC1=CC2=C(C=C1OCCO)C(NC1=CC=CC(=C1)C#C)=NC=N2 |c:7,9,20,22,26,28,t:5,18|	4.283	5	2	9
S2206	R788 (Fostamatinib) Disodium	624.42	1025687-58-4	Syk	http://selleckchem.com/products/R788(Fostamatinib-disodium).html	R788 (Fostamatinib) disodium, a prodrug of the active metabolite R406, is a Syk inhibitor with IC50 of 41 nM in a cell-free assay, strongly inhibits Syk but not Lyn, 5-fold less potent to Flt3. Phase 3.	Angiogenesis	C23H24FN6Na2O9P	Sodium Salt	N/A	[Na+].[Na+].COC1=CC(NC2=NC=C(F)C(NC3=CC=C4OC(C)(C)C(=O)N(COP([O-])([O-])=O)C4=N3)=N2)=CC(OC)=C1OC |c:31,33,35,39,t:2,6,8,13,15|
S2207	PIK-293	397.43	900185-01-5	PI3K	http://www.selleckchem.com/products/PIK-293.html	PIK-293 is a PI3K inhibitor, mostly for PI3Kδ with IC50 of 0.24 μM, 500-, 100- and 50-fold less potent to PI3Kα/β/γ, respectively.	PI3K/Akt/mTOR	C22H19N7O	Free Base	N/A	CC1=CC=CC2=C1C(=O)N(C(CN1N=CC3=C1N=CN=C3N)=N2)C1=C(C)C=CC=C1 |c:3,5,14,16,19,21,24,27,30,32,t:1|	3.162	5	1	3
S2208	Formestane	302.41	566-48-3	Aromatase	http://www.selleckchem.com/products/Formestane.html	Formestane(Lentaron(R)) is a second generation selective aromatase inhibitor with an IC50 of 80 nM.	Endocrinology & Hormones	C19H26O3	Free Base	Lentaron(R), 17-dione, CGP-32349, NSC 282175	[H][C@@]12CCC(=O)[C@@]1(C)CC[C@@]1([H])[C@@]2([H])CCC2=C(O)C(=O)CC[C@]12C |r,c:18|	3.036	2	1	0
S2214	AZ 960	354.36	905586-69-8	JAK	http://www.selleckchem.com/products/AZ-960.html	AZ 960 is a novel ATP competitive JAK2 inhibitor with IC50 and Ki of <3 nM and 0.45 nM, 3-fold selectivity of AZ960 for JAK2 over JAK3.	JAK/STAT	C18H16F2N6	Free Base	N/A	C[C@H](NC1=NC(NC2=NNC(C)=C2)=C(F)C=C1C#N)C1=CC=C(F)C=C1 |r,c:11,16,26,t:3,7,13,21,23|	4.495	2	3	5
S2215	DAPT (GSI-IX)	432.46	208255-80-5	Beta Amyloid,Gamma-secretase	http://www.selleckchem.com/products/DAPT-GSI-IX.html	DAPT (GSI-IX) is a novel γ-secretase inhibitor, which inhibits Aβ production with IC50 of 20 nM in HEK 293 cells.	Proteases	C23H26F2N2O4	Free Base	GSI-IX	C[C@H](NC(=O)CC1=CC(F)=CC(F)=C1)C(=O)N[C@H](C(=O)OC(C)(C)C)C1=CC=CC=C1 |r,c:9,12,28,30,t:6,26|	3.385	4	2	9
S2216	Mubritinib (TAK 165)	468.47	366017-09-6	HER2	http://www.selleckchem.com/products/Mubritinib-TAK-165.html	Mubritinib (TAK-165) is a potent inhibitor of HER2/ErbB2 with IC50 of 6 nM; no activity to EGFR, FGFR, PDGFR, JAK1, Src and Blk.	Protein Tyrosine Kinase	C25H23F3N4O2	Free Base	TAK 165, TAK165	FC(F)(F)C1=CC=C(\C=C\C2=NC(COC3=CC=C(CCCCN4C=CN=N4)C=C3)=CO2)C=C1 |c:24,26,29,31,35,t:4,6,10,15,17|	5.844	5	0	11
S2217	Irinotecan HCl Trihydrate	677.18	136572-09-3	Topoisomerase	http://www.selleckchem.com/products/Irinotecan-Hcl-Trihydrate-Campto.html	Irinotecan prevents DNA from unwinding by inhibition of topoisomerase 1.	DNA Damage	C33H45ClN4O9	HCl & trihydrat	CPT 11, Camptosar, Campto, Irinotecan	O.O.O.Cl.CCC1=C2CN3C(=CC4=C(COC(=O)[C@]4(O)CC)C3=O)C2=NC2=CC=C(OC(=O)N3CCC(CC3)N3CCCCC3)C=C12 |r,c:2,6,23,t:8,25,27,46|	3.446	6	0	5
S2218	Torkinib (PP242)	308.34	1092351-67-1	Autophagy,mTOR	http://www.selleckchem.com/products/PP242.html	PP242 is a selective mTOR inhibitor with IC50 of 8 nM; targets both mTOR complexes with >10- and 100-fold selectivity for mTOR than PI3Kδ or PI3Kα/β/γ, respectively.	PI3K/Akt/mTOR	C16H16N6O	Free Base	TORKinib	CC(C)N1N=C(C2=CC3=C(N2)C=CC(O)=C3)C2=C(N)N=CN=C12 |c:8,12,15,18,21,t:4,6,23|	2.908	3	3	2
S2219	Momelotinib (CYT387)	414.46	1056634-68-4	JAK	http://www.selleckchem.com/products/Cyt387.html	CYT387 is an ATP-competitive inhibitor of JAK1/JAK2 with IC50 of 11 nM/18 nM, ~10-fold selectivity versus JAK3. Phase 1/2.	JAK/STAT	C23H22N6O2	Free Base	CYT 11387	O=C(NCC#N)C1=CC=C(C=C1)C1=NC(NC2=CC=C(C=C2)N2CCOCC2)=NC=C1 |c:8,10,19,21,30,32,t:6,13,17|	2.857	4	2	6
S2220	SB590885	453.54	405554-55-4	Raf	http://www.selleckchem.com/products/SB590885.html	SB590885 is a potent B-Raf inhibitor with Ki of 0.16 nM, 11-fold greater selectivity for B-Raf over c-Raf, no inhibition to other human kinases.	MAPK	C27H27N5O2	Free Base	GSK2118436	CN(C)CCOC1=CC=C(C=C1)C1=NC(=C(N1)C1=CC=C2C(CC\C2=N/O)=C1)C1=CC=NC=C1 |c:8,10,15,21,29,34,36,t:6,13,19,32|	4.503	4	1	7
S2221	Apatinib	493.58	811803-05-1	VEGFR	http://www.selleckchem.com/products/Apatinib-YN968D1.html	Apatinib is an orally bioavailable, selective VEGFR2 inhibitor with IC50 of 1 nM.	Protein Tyrosine Kinase	C25H27N5O4S	Sulfate	YN968D1	CS(O)(=O)=O.O=C(NC1=CC=C(C=C1)C1(CCCC1)C#N)C1=CC=CN=C1NCC1=CC=NC=C1 |c:9,11,24,26,33,35,t:7,22,31|	3.164	3	2	6
S2222	PF-3716556	394.47	928774-43-0	ATPase,Proton Pump	http://selleckchem.com/products/PF-3716556.html	PF 3716556 is a potent and selective P-CAB (potassium-competitive acid blocker), with pIC50 of 6.026 and 7.095 for the inhibition of porcine H+,K+-ATPase activity in ion-leaky and ion-tight assay, respectively, inhibits gastric acid secretion, displays no activity at Na+,K+-ATPase, used for the treatment of gastroesophageal reflux disease.	Transmembrane Transporters	C22H26N4O3	Free Base	N/A	CN(CCO)C(=O)C1=CN2C=C(C)N=C2C(N[C@@H]2CCOC3=CC=CC(C)=C23)=C1 |r,c:13,24,30,t:7,10,22,27|	1.499	3	2	5
S2224	UK 383367	324.38	348622-88-8	Procollagen C Proteinase	http://www.selleckchem.com/products/uk-383367.html	UK-383367 is a procollagen C-proteinase inhibitor with IC50 of 44 nM, has excellent selectivity over MMPs.	Metabolism	C15H24N4O4	Free Base	UK-383367	NC(=O)C1=NOC(=N1)[C@H](CCCC1CCCCC1)CC(=O)NO |r,c:6,t:3|	1.731	5	2	8
S2225	TAME	342.41	901-47-3	APC,E3 Ligase	http://www.selleckchem.com/products/TAME.html	Tosyl-L-Arginine Methyl Ester (TAME) is an APC inhibitor.	Cell Cycle	C14H22N4O4S	Free Base	N/A	COC(=O)[C@H](CCCNC(N)=N)NS(=O)(=O)C1=CC=C(C)C=C1 |r,c:21,t:16,18|	0.749	4	3	10
S2226	Idelalisib (CAL-101, GS-1101)	415.42	870281-82-6	PI3K	http://www.selleckchem.com/products/CAL-101.html	CAL-101 (Idelalisib, GS-1101) is a selective p110δ inhibitor with IC50 of 2.5 nM; shown to have 40- to 300-fold greater selectivity for p110δ thanp110α/β/γ, and 400- to 4000-fold more selectivity to p110δ than C2β, hVPS34, DNA-PK and mTOR. Phase 3.	PI3K/Akt/mTOR	C22H18FN7O	Free Base	CAL101	CC[C@H](NC1=C2N=CNC2=NC=N1)C1=NC2=CC=CC(F)=C2C(=O)N1C1=CC=CC=C1 |r,c:4,6,10,12,19,22,31,33,t:15,17,29|	3.624	5	2	5
S2227	PIK-294	489.53	900185-02-6	PI3K	http://www.selleckchem.com/products/PIK-294.html	PIK-294 is a highly selective p110δ inhibitor with IC50 of 10 nM, 1000-, 49- and 16-fold less potent to PI3Kα/β/γ, respectively.	PI3K/Akt/mTOR	C28H23N7O2	Free Base	N/A	CC1=CC=CC2=C1C(=O)N(C(CN1N=C(C3=C(N)N=CN=C13)C1=CC(O)=CC=C1)=N2)C1=C(C)C=CC=C1 |c:3,5,14,16,19,28,30,32,35,38,40,t:1,21,25|	4.867	5	2	4
S2228	Belnacasan (VX-765)	509	273404-37-8	Caspase	http://www.selleckchem.com/products/VX-765.html	VX-765 is a potent and selective inhibitor of caspase-1 with Ki of 0.8 nM.	Apoptosis	C24H33ClN4O6	Free Base	N/A	CCO[C@@H]1OC(=O)C[C@@H]1NC(=O)[C@@H]1CCCN1C(=O)[C@@H](NC(=O)C1=CC(Cl)=C(N)C=C1)C(C)(C)C |r,c:31,t:25,28|	1.698	6	3	8
S2229	Eltrombopag Olamine	564.63	496775-62-3	Thrombin	http://www.selleckchem.com/products/Eltrombopag-SB-497115-GR.html	Eltrombopag is a member of the biarylhydrazone class, which is a nonpeptide agonist of the thrombopoietin receptor (TpoR).	Others	C29H36N6O6	diolamine	SB-497115-GR, SB497115	NCCO.NCCO.CC1=NN(C(=O)C\1=N/NC1=CC=CC(C2=CC(=CC=C2)C(O)=O)=C1O)C1=CC=C(C)C(C)=C1 |c:18,23,25,30,40,t:7,16,21,34,36|	-0.151	4	6	7
S2230	Galunisertib (LY2157299)	369.42	700874-72-2	TGF-beta/Smad	http://www.selleckchem.com/products/ly2157299.html	LY2157299 is a potent TGFβ receptor I (TβRI) inhibitor with IC50 of 56 nM. Phase 2.	TGF-beta/Smad	C22H19N5O	Free Base	N/A	CC1=CC=CC(=N1)C1=NN2CCCC2=C1C1=CC=NC2=C1C=C(C=C2)C(N)=O |c:3,5,15,20,22,25,27,t:1,8,18|	3.095	4	1	3
S2231	Telatinib	409.83	332012-40-5	c-Kit,PDGFR,VEGFR	http://www.selleckchem.com/products/Telatinib-BAY-57-9352.html	Telatinib is a potent inhibitor of VEGFR2/3, c-Kit and PDGFRβ with IC50 of 6 nM/4 nM, 1 nM and 15 nM, respectively. Phase 2.	Protein Tyrosine Kinase	C20H16ClN5O3	Free Base	N/A	CNC(=O)C1=NC=CC(COC2=NN=C(NC3=CC=C(Cl)C=C3)C3=C2OC=C3)=C1 |c:6,21,24,28,30,t:4,11,13,16,18|	3.861	6	2	6
S2233	Esomeprazole sodium	367.4	161796-78-7	ATPase	http://www.selleckchem.com/products/Esomeprazole-sodium-Nexium-I.V..html	Esomeprazole sodium (Nexium) is a sodium salt of esomeprazole that is a potent proton pump inhibitor with an IC50 of 0.076 mg/kg.	Transmembrane Transporters	C17H18N3NaO3S	Sodium salt	N/A	COC1=CC=C2N([Na])C(=NC2=C1)[S@@](=O)CC1=NC=C(C)C(OC)=C1C	3.008	5	0	5
S2235	Volasertib (BI 6727)	618.81	755038-65-4	PLK	http://www.selleckchem.com/products/BI6727-Volasertib.html	BI6727 (Volasertib) is a highly potent Plk1 inhibitor with IC50 of 0.87 nM. It shows 6- and 65-fold greater selectivity against Plk2 and Plk3. Phase 2.	Cell Cycle	C34H50N8O3	Free Base	N/A	CC[C@H]1N(C(C)C)C2=C(C=NC(NC3=CC=C(C=C3OC)C(=O)N[C@H]3CC[C@@H](CC3)N3CCN(CC4CC4)CC3)=N2)N(C)C1=O |r,c:9,15,17,43,t:7,13|	4.838	5	2	10
S2238	Palomid 529 (P529)	406.43	914913-88-5	mTOR	http://selleckchem.com/products/Palomid-529-P529.html	Palomid 529 (P529) inhibits both the mTORC1 and mTORC2 complexes, reduces phosphorylation of pAktS473, pGSK3βS9, and pS6 but no effect observed on pMAPK or pAktT308. Phase 1.	PI3K/Akt/mTOR	C24H22O6	Free Base	P529	COC1=CC=C(COC2=C(OC)C=C3C(OC(=O)C4=C3C=CC(=C4)C(C)O)=C2)C=C1 |c:8,12,18,21,23,28,31,t:2,4|	4.257	5	1	6
S2240	Fesoterodine Fumarate	527.65	286930-03-8	AChR	http://www.selleckchem.com/products/Fesoterodine-fumarate-Toviaz.html	Fesoterodine fumarate (Toviaz) is an antimuscarinic agent and is rapidly de-esterified to its active metabolite 5-hydroxymethyl tolterodine that is a muscarinic receptor antagonist.	Neuronal Signaling	C30H41NO7	Fumarate	N/A	OC(=O)\C=C\C(O)=O.CC(C)N(CC[C@H](C1=CC=CC=C1)C1=CC(CO)=CC=C1OC(=O)C(C)C)C(C)C |r,c:16,18,25,27,t:14,21|	2.714	4	1	13
S2243	Degrasyn (WP1130)	384.27	856243-80-6	Bcr-Abl,DUB	http://www.selleckchem.com/products/WP1130.html	WP1130 (Degrasyn) is a selective deubiquitinase (DUB: USP5, UCH-L1, USP9x, USP14, and UCH37) inhibitor and also suppresses Bcr/Abl, also a JAK2 transducer (without affecting 20S proteasome) and activator of transcription (STAT).	Angiogenesis	C19H18BrN3O	Free Base	N/A	CCC[C@H](NC(=O)C(=C\C1=NC(Br)=CC=C1)\C#N)C1=CC=CC=C1 |r,c:12,14,21,23,t:9,19|	4.546	2	1	6
S2244	AR-42	312.36	935881-37-1	HDAC	http://selleckchem.com/products/AR-42-HDAC-42.html	AR-42 is an HDAC inhibitor with IC50 of 30 nM. Phase 1.	Epigenetics	C18H20N2O3	Free Base	OSU-HDAC42	CC(C)[C@H](C(=O)NC1=CC=C(C=C1)C(=O)NO)C1=CC=CC=C1 |r,c:9,11,20,22,t:7,18|	2.834	2	2	5
S2247	Buparlisib (BKM120, NVP-BKM120)	410.39	944396-07-0	PI3K	http://www.selleckchem.com/products/BKM-120.html	BKM120 is a selective PI3K inhibitor of p110α/β/δ/γ with IC50 of 52 nM/166 nM/116 nM/262 nM, respectively. Reduced potency against VPS34, mTOR, DNAPK, with little activity to PI4Kβ. Phase 1/2.	PI3K/Akt/mTOR	C18H21F3N6O2	Free Base	N/A	NC1=CC(=C(C=N1)C1=NC(=NC(=C1)N1CCOCC1)N1CCOCC1)C(F)(F)F |c:3,5,10,12,t:1,8|	2.342	5	1	4
S2248	Silmitasertib (CX-4945)	349.77	1009820-21-6	Casein Kinase	http://www.selleckchem.com/products/cx-4945-silmitasertib.html	CX-4945 is a potent and selective inhibitor of CK2 (casein kinase 2) with IC50 of 1 nM, less potent to Flt3, Pim1 and CDK1 (inactive in cell-based assay). Phase 1.	Others	C19H12ClN3O2	Free Base	N/A	OC(=O)C1=CC2=C(C=C1)C1=CN=CC=C1C(NC1=CC(Cl)=CC=C1)=N2 |c:5,7,12,14,22,24,26,t:3,10,19|	4.157	3	1	3
S2250	(-)-Epigallocatechin Gallate	458.37	989-51-5	DNA Methyltransferase,HER2,Telomerase,EGFR	http://www.selleckchem.com/products/(-)-Epigallocatechin-gallate.html	(-)-Epigallocatechin Gallate is the main catechin extraction of green tea, which shows multiple bioactivity.	Others	C22H18O11	Free Base	EGCG	OC1=CC2=C(C[C@@H](OC(=O)C3=CC(O)=C(O)C(O)=C3)[C@H](O2)C2=CC(O)=C(O)C(O)=C2)C(O)=C1 |r,c:17,30,34,t:1,3,10,13,23,26|	3.097	3	8	4
S2252	(+)-Usniacin	344.32	7562-61-0	Others	http://www.selleckchem.com/products/(+)-Usniacin(D-Usnic-acid).html	(+)-Usniacin is a naturally occurring dibenzofuran derivative found in several lichen species.	Others	C18H16O7	Free Base	D-Usnic acid	CC(=O)C1=C(O)C(C)=C(O)C2=C1OC1=CC(=O)C(C(C)=O)=C(O)[C@@]21C |r,c:3,10,t:7,14,21|	1.087	4	3	2
S2253	3-Indolebutyric acid (IBA)	203.24	133-32-4	Others	http://www.selleckchem.com/products/3-Indolebutyric-acid(IBA).html	3-Indolebutyric acid(IBA) is a plant hormone in the auxin family and is an ingredient in many commercial plant rooting horticultural products.	Others	C12H13NO2	Free Base	IBA	OC(=O)CCCC1=CNC2=C1C=CC=C2 |c:9,12,14,t:6|	2.7	1	1	4
S2256	4-Methylumbelliferone (4-MU)	176.17	90-33-5	Others	http://www.selleckchem.com/products/4-Methylumbelliferone(4-MU).html	4-Methylumbelliferone is a hyaluronic acid (HA) synthesis inhibitor with an IC50 of 0.4 mM.	Others	C10H8O3	Free Base	4-MU	CC1=CC(=O)OC2=C1C=CC(O)=C2 |c:6,9,12,t:1|	2.104	2	1	0
S2258	Esculin	340.28	531-75-9	Others	http://www.selleckchem.com/products/Aesculin(Esculin).html	Esculin is a glucoside found in horse chestnuts.	Others	C15H16O9	Free Base	Esculin	OC[C@H]1O[C@@H](OC2=C(O)C=C3OC(=O)C=CC3=C2)[C@H](O)[C@@H](O)[C@@H]1O |r,c:6,14,17,t:9|	-0.514	4	5	3
S2259	Aloe-emodin	270.24	481-72-1	Antifection	http://www.selleckchem.com/products/Aloe-emodin.html	Aloe-emodin is an interferon-inducing agent with IC50 of about 1 μg/mL for JEV and of about 0.33 μg/mL for EV71.	Others	C15H10O5	Free Base	N/A	OCC1=CC2=C(C(O)=C1)C(=O)C1=C(C=CC=C1O)C2=O |c:4,7,14,16,t:2,12|	1.719	2	3	1
S2260	Amygdalin	457.43	29883-15-6	Others	http://www.selleckchem.com/products/Amygdalin.html	Laetrile is a glycoside initially isolated from the seeds of the tree Prunus dulcis, also known as bitter almonds.	Others	C20H27NO11	Free Base	N/A	OC[C@H]1O[C@@H](OC[C@H]2O[C@@H](O[C@@H](C#N)C3=CC=CC=C3)[C@H](O)[C@@H](O)[C@@H]2O)[C@H](O)[C@@H](O)[C@@H]1O |r,c:16,18,t:14|	-2.403	4	7	7
S2261	Andrographolide	350.45	5508-58-7	NF-κB	http://www.selleckchem.com/products/Andrographolide.html	Andrographolide is a labdane diterpenoid that is the main bioactive component of the medicinal plant Andrographis paniculata.	Others	C20H30O5	Free Base	N/A	[H][C@]12CCC(=C)[C@@H](C\C=C3/C(O)COC3=O)[C@]1(C)CC[C@@H](O)[C@@]2(C)CO |r|	2.056	2	3	3
S2262	Apigenin	270.24	520-36-5	P450 (e.g. CYP17)	http://www.selleckchem.com/products/Apigenin.html	Apigenin is a potent P450 inhibitor for CYP2C9 with IC50 of 23 pM.	Metabolism	C15H10O5	Free Base	N/A	OC1=CC=C(C=C1)C1=CC(=O)C2=C(O1)C=C(O)C=C2O |c:3,5,12,19,t:1,8,16|	2.41	2	3	1
S2263	Arbutin	272.25	497-76-7	Tyrosinase	http://www.selleckchem.com/products/Arbutin(Uva,-p-Arbutin).html	Arbutin is a tyrosinase inhibitor with an IC50 of 1.09 mM.	Others	C12H16O7	Free Base	Uva, Ursi, p-Arbutin, Hydroquinone β-D-glucopyranoside	OC[C@H]1O[C@@H](OC2=CC=C(O)C=C2)[C@H](O)[C@@H](O)[C@@H]1O |r,c:11,t:6,8|	-0.584	2	5	3
S2264	Artemether	298.37	71963-77-4	Antifection	http://www.selleckchem.com/products/Artemether(SM-224).html	Artemether is an antimalarial for the treatment of resistant strains of falciparum malaria.	Others	C16H26O5	Free Base	SM-224, CGP 56696	[H][C@@]12CC[C@@H](C)[C@]3([H])CC[C@]4(C)OO[C@@]13[C@]([H])(O[C@H](OC)[C@@H]2C)O4 |r|	2.029	5	0	1
S2265	Artesunate	384.42	88495-63-0	STAT	http://www.selleckchem.com/products/Artesunate.html	Artesunate is a part of the artemisinin group of agents with an IC50 of < 5 μM for small cell lung carcinoma cell line H69.	Others	C19H28O8	Free Base	N/A	[H][C@@]12CC[C@@H](C)[C@]3([H])CC[C@]4(C)OO[C@@]13[C@]([H])(O[C@H](OC(=O)CCC(O)=O)[C@@H]2C)O4 |r|	1.845	7	0	5
S2266	Asiatic Acid	488.7	464-92-6	p38 MAPK	http://www.selleckchem.com/products/Asiatic-acid.html	Asiatic acid is the aglycone of asiaticoside isolated from the plant Centella asiatica, commonly used in wound healing.	MAPK	C30H48O5	Free Base	N/A	[H][C@@]12[C@@H](C)[C@H](C)CC[C@@]1(CC[C@]1(C)C2=CC[C@]2([H])[C@@]3(C)C[C@@H](O)[C@H](O)[C@@](C)(CO)[C@]3([H])CC[C@@]12C)C(O)=O |r,t:15|	4.435	1	3	2
S2267	Azomycin	113.07	527-73-1	Others	http://www.selleckchem.com/products/Azomycin(2-Nitroimidazole).html	Azomycin is an antimicrobial antibiotic produced by a strain of Nocardia mesenterica.	Others	C3H3N3O2	Free Base	2-Nitroimidazole	[O-][N+](=O)C1=NC=CN1 |c:5,t:3|	0.153	1	1	1
S2268	Baicalein	270.24	491-67-8	P450 (e.g. CYP17)	http://www.selleckchem.com/products/Baicalein.html	Baicalein is a CYP2C9 and prolyl endopeptidase inhibitor.	Metabolism	C15H10O5	Free Base	N/A	OC1=C(O)C(O)=C2C(=O)C=C(OC2=C1)C1=CC=CC=C1 |c:1,9,13,18,20,t:5,16|	2.41	2	3	1
S2269	Baicalin	446.36	21967-41-9	GABA Receptor	http://www.selleckchem.com/products/Baicalin.html	Baicalin is a known prolyl endopeptidase inhibitor and affects the GABA receptors.	Others	C21H18O11	Free Base	N/A	O[C@H]1[C@@H](OC2=C(O)C(O)=C3C(=O)C=C(OC3=C2)C2=CC=CC=C2)O[C@@H]([C@@H](O)[C@@H]1O)C(O)=O |r,c:4,12,16,21,23,t:8,19|	0.608	5	5	4
S2270	Bergenin	328.27	477-90-7	Others	http://www.selleckchem.com/products/Bergenin-(Cuscutin).html	Bergenin is trihydroxybenzoic acid glycoside and the C-glycoside of 4-O-methyl gallic acid.	Others	C14H16O9	Free Base	Cuscutin	[H][C@]12OC(=O)C3=C(C(O)=C(OC)C(O)=C3)[C@]1([H])O[C@H](CO)[C@@H](O)[C@@H]2O |r,c:13,t:5,8|	-0.849	4	5	2
S2271	Berberine chloride	371.82	633-65-8	Antifection	http://www.selleckchem.com/products/Berberine-Hydrochloride.html	Berberine Hydrochloride is a quaternary ammonium salt from the group of isoquinoline alkaloids.	Others	C20H18ClNO4	chloride	N/A	[Cl-].COC1=CC=C2C=C3C4=C(CC[N+]3=CC2=C1OC)C=C1OCOC1=C4 |c:8,13,16,27,t:2,4,6,21|	1.289	4	0	2
S2276	Bilobalide	326.3	33570-04-6	Others	http://www.selleckchem.com/products/Bilobalide.html	Bilobalide is a biologically active terpenic trilactone present in Ginkgo biloba.	Others	C15H18O8	Free Base	N/A	[H][C@]12C[C@@](O)(C(C)(C)C)C34[C@@H](O)C(=O)O[C@@]3([H])OC(=O)[C@]14CC(=O)O2 |r|	-0.641	6	1	1
S2277	Caffeic Acid	180.16	331-39-5	Others	http://www.selleckchem.com/products/Caffeic-acid.html	Caffeic acid is a hydroxycinnamic acid, a naturally occurring organic compound.	Others	C9H8O4	Free Base	N/A	OC(=O)\C=C\C1=CC=C(O)C(O)=C1 |c:11,t:5,7|	1.443	1	2	2
S2280	Chlorogenic Acid	354.31	327-97-9	Others	http://www.selleckchem.com/products/Chlorogenic-acid.html	Chlorogenic acid is a hydroxycinnamic acid and a member of a family of naturally occurring organic compounds.	Others	C16H18O9	Free Base	N/A	O[C@@H]1C[C@](O)(C[C@@H](OC(=O)\C=C\C2=CC(O)=C(O)C=C2)[C@@H]1O)C(O)=O |r,c:18,t:12,15|	-0.34	3	4	5
S2281	Chrysin	254.24	480-40-0	Others	http://www.selleckchem.com/products/Chrysin.html	Chrysin is a naturally occurring flavone chemically extracted from the blue passion flower (Passiflora caerulea).	Others	C15H10O4	Free Base	N/A	OC1=CC2=C(C(=O)C=C(O2)C2=CC=CC=C2)C(O)=C1 |c:7,13,15,19,t:1,3,11|	2.652	2	2	1
S2282	Cinchonidine	294.39	485-71-2	Antifection	http://www.selleckchem.com/products/Cinchonidine.html	Cinchonidine is an alkaloid used in asymmetric synthesis in organic chemistry.	Others	C19H22N2O	Free Base	N/A	[H][C@@]1(CN2CCC1C[C@@]2([H])[C@H](O)C1=CC=NC2=CC=CC=C12)C=C |r,c:16,20,t:14,18,22|	2.75	1	1	3
S2285	Cryptotanshinone	296.36	35825-57-1	STAT	http://www.selleckchem.com/products/Cryptotanshinone.html	Cryptotanshinone (CPT) is a STAT3 inhibitor with IC50 of 4.6 μM, strongly inhibits phosphorylation of STAT3 Tyr705, with a small effect on STAT3 Ser727, but none against STAT1 nor STAT5.	JAK/STAT	C19H20O3	Free Base	N/A	C[C@H]1COC2=C1C(=O)C(=O)C1=C3CCCC(C)(C)C3=CC=C21 |r,c:4,11,20,t:22|	3.761	3	0	0
S2286	Cyclosporin A	1202.61	59865-13-3	phosphatase	http://www.selleckchem.com/products/Cyclosporin-A(Cyclosporine-A).html	Cyclosporin A is an immunosuppressive agent, binds to the cyclophilin and then inhibits calcineurin with IC50 of 7 nM, widely used in organ transplantation to prevent rejection. Phase 4.	Others	C62H111N11O12	Free Base	Cyclosporine A	CC[C@@H]1NC(=O)[C@H]([C@H](O)[C@H](C)C\C=C\C)N(C)C(=O)C(C(C)C)N(C)C(=O)[C@H](CC(C)C)N(C)C(=O)[C@H](CC(C)C)N(C)C(=O)[C@@H](C)NC(=O)[C@H](C)NC(=O)[C@H](CC(C)C)N(C)C(=O)[C@@H](NC(=O)[C@H](CC(C)C)N(C)C(=O)CN(C)C1=O)C(C)C |r,@:20|	4.333	11	5	15
S2287	Cytisine	190.24	485-35-8	AChR	http://www.selleckchem.com/products/Cytisine(Baphitoxine,-Sophorine).html	Cytisine is a nicotinic acetylcholine receptor agonist.	Others	C11H14N2O	Free Base	Baphitoxine, Sophorine	O=C1C=CC=C2[C@H]3CNC[C@H](C3)CN12 |r,c:2,t:4|	-0.338	1	1	0
S2290	Dihydroartemisinin (DHA)	284.35	71939-50-9	Others	http://selleckchem.com/products/Dihydroartemisinin(DHA).html	Dihydroartemisinin (DHA) is a semi-synthetic derivative of artemisinin and isolated from the traditional Chinese herb Artemisia annua.	Others	C15H24O5	Free Base	N/A	[H][C@@]12CC[C@@H](C)[C@]3([H])CC[C@@]4(C)OO[C@@]13[C@]([H])(O[C@@H](O)[C@@H]2C)O4 |r|	1.621	4	0	0
S2293	DL-Carnitine HCl	197.66	461-05-2	Others	http://www.selleckchem.com/products/DL-Carnitine-hydrochloride.html	DL-Carnitine hydrochloride is a quaternary ammonium compound biosynthesized from the amino acids lysine and methionine.	Others	C7H16ClNO3	Hydrochloride	N/A	[Cl-].C[N+](C)(C)CC(O)CC(O)=O	-4.49	1	1	4
S2295	Emodin	270.24	518-82-1	Dehydrogenase	http://www.selleckchem.com/products/Emodin.html	Emodin is a purgative resin, 6-methyl-1,3,8-trihydroxyanthraquinone, from rhubarb, the buckthorn and Japanese Knotweed (Fallopia japonica).	Others	C15H10O5	Free Base	N/A	CC1=CC2=C(C(O)=C1)C(=O)C1=C(C=C(O)C=C1O)C2=O |c:3,6,16,t:1,11,13|	2.568	2	3	0
S2296	Enoxolone	470.68	471-53-4	Dehydrogenase	http://www.selleckchem.com/products/Enoxolone(Glycyrrhetin).html	Enoxolone is a pentacyclic triterpenoid derivative of the beta-amyrin type obtained from the hydrolysis of glycyrrhizic acid, which was obtained from the herb liquorice.	Others	C30H46O4	Free Base	Glycyrrhetin, Uralenic acid	[H][C@]1(O)CC[C@@]2(C)[C@@]([H])(CC[C@]3(C)[C@]2([H])C(=O)C=C2[C@]4([H])C[C@](C)(CC[C@]4(C)CC[C@@]32C)C(O)=O)C1(C)C |r,t:18|	5.656	2	1	1
S2298	Fisetin	286.24	528-48-3	Sirtuin	http://www.selleckchem.com/products/Fisetin(Fustel).html	Fisetin (Fustel) is a potent sirtuin activating compound (STAC) and an agent that modulates sirtuins.	Others	C15H10O6	Free Base	Fustel, Viset	OC1=CC2=C(C=C1)C(=O)C(O)=C(O2)C1=CC(O)=C(O)C=C1 |c:3,5,11,21,t:1,15,18|	1.872	2	4	1
S2299	Formononetin	268.26	485-72-3	Others	http://www.selleckchem.com/products/Formononetin(Formononetol).html	Formononetin is a phytoestrogen from the root of Astragalus membranaceus and an O-methylated isoflavone.	Others	C16H12O4	Free Base	Biochanin B, Formononetol	COC1=CC=C(C=C1)C1=COC2=C(C=CC(O)=C2)C1=O |c:4,6,14,17,t:2,9,12|	2.608	3	1	2
S2300	Ferulic Acid	194.19	1135-24-6	Others	http://www.selleckchem.com/products/Fumalic-acid(Ferulic-acid).html	Ferulic Acid is a hydroxycinnamic acid and a type of organic compound found in the Ferula assafoetida L. or Ligusticum chuanxiong.	Others	C10H10O4	Free Base	Ferulic acid	COC1=CC(\C=C\C(O)=O)=CC=C1O |c:9,11,t:2|	1.669	2	1	3
S2302	Glycyrrhizin (Glycyrrhizic Acid)	822.93	1405-86-3	Dehydrogenase	http://selleckchem.com/products/Glycyrrhizic-acid.html	Glycyrrhizin (Glycyrrhizic Acid) is a widely used anti-inflammatory agent isolated from the licorice root.	Metabolism	C42H62O16	Free Base	N/A	[H][C@@]12C[C@](C)(CC[C@]1(C)CC[C@]1(C)C2=CC(=O)[C@]2([H])[C@@]3(C)CC[C@H](O[C@H]4O[C@@H]([C@@H](O)[C@H](O)[C@H]4O[C@@H]4O[C@@H]([C@@H](O)[C@H](O)[C@H]4O)C(O)=O)C(O)=O)C(C)(C)[C@]3([H])CC[C@@]12C)C(O)=O |r,t:15|	2.417	8	5	7
S2303	gossypol-Acetic acid	518.56	12542-36-8	Dehydrogenase	http://www.selleckchem.com/products/Gossypol.html	Gossypol is a polyphenolic aldehyde that permeates cells and acts as an inhibitor for several dehydrogenase enzymes.	Others	C32H34O10	Acetate	Pogosin, AT101	CC(O)=O.[H]C(=O)C1=C(O)C(O)=C(C(C)C)C2=C1C(O)=C(C(C)=C2)C1=C(O)C2=C(C([H])=O)C(O)=C(O)C(C(C)C)=C2C=C1C |c:6,15,19,22,25,28,40,43,t:10,34|	6.388	3	6	5
S2304	Gramine	174.24	87-52-5	Others	http://www.selleckchem.com/products/Gramine.html	Gramine is a naturally occurring indole alkaloid present in several plant species.	Others	C11H14N2	Free Base	N/A	CN(C)CC1=CNC2=C1C=CC=C2 |c:7,10,12,t:4|	2.197	0	1	2
S2306	Gynostemma Extract	917.13	80321-63-7	Others	http://www.selleckchem.com/products/Gynostemma-Extract.html	Gynostemma Extract is a saponins extract derived from the Gynostemma pentaphyllum.	Others	C47H80O17	Free Base	N/A	[H][C@@]12[C@H](CC[C@@]1(C)[C@]1(C)CC[C@@]3([H])C(C)(C)[C@H](CC[C@]3(C)[C@@]1([H])C[C@H]2O)O[C@@H]1O[C@H](CO)[C@@H](O)[C@H](O)[C@H]1O)[C@](C)(CCC=C(C)C)O[C@@H]1O[C@H](CO[C@@H]2OC[C@@H](O)[C@H](O)[C@H]2O)[C@@H](O)[C@H](O)[C@H]1O |r|	1.059	6	11	12
S2308	Hesperetin	302.27	520-33-2	TGF-beta/Smad,Histamine Receptor	http://www.selleckchem.com/products/Hesperetin.html	Hesperetin is a bioflavonoid and, to be more specific, a flavanone.	TGF-beta/Smad	C16H14O6	Free Base	N/A	COC1=CC=C(C=C1O)[C@@H]1CC(=O)C2=C(O)C=C(O)C=C2O1 |r,c:4,6,14,20,t:2,17|	2.357	3	3	2
S2309	Hesperidin	610.56	520-26-3	Others	http://www.selleckchem.com/products/Hesperidin.html	Hesperidin is a flavanone glycoside found abundantly in citrus fruits.	Others	C28H34O15	Free Base	N/A	COC1=CC=C(C=C1O)[C@@H]1CC(=O)C2=C(O)C=C(O[C@@H]3O[C@H](CO[C@@H]4O[C@@H](C)[C@H](O)[C@@H](O)[C@H]4O)[C@@H](O)[C@H](O)[C@H]3O)C=C2O1 |r,c:4,6,14,43,t:2,17|	-0.431	7	8	7
S2310	Honokiol	266.334	35354-74-6	Akt,MEK	http://www.selleckchem.com/products/Honokiol.html	Honokiol is the active principle of magnolia extract that inhibits Akt-phosphorylation and promotes ERK1/2phosphorylation. Phase 3.	PI3K/Akt/mTOR	C18H18O2	Free Base	N/A	OC1=CC=C(CC=C)C=C1C1=CC(CC=C)=C(O)C=C1 |c:8,19,t:1,3,11,16|	4.88	0	2	5
S2311	Hyodeoxycholic acid (HDCA)	392.57	83-49-8	Others	http://www.selleckchem.com/products/Hyodeoxycholic-acid(HDCA).html	Hyodeoxycholic(HDCA) acid is a secondary bile acid, one of the metabolic byproducts of intestinal bacteria.	Others	C24H40O4	Free Base	3α,6α-Dihydroxy-5β-cholan-24-oic acid, HDCA	[H][C@@]12CC[C@H]([C@H](C)CCC(O)=O)[C@@]1(C)CC[C@@]1([H])[C@@]2([H])C[C@H](O)[C@]2([H])C[C@H](O)CC[C@]12C |r|	4.014	1	2	4
S2312	Icariin	676.66	489-32-7	PDE	http://www.selleckchem.com/products/Icariin.html	Icariin is a cGMP-specific PDE5 inhibitor with IC50 of 0.432 μM, 167-fold more selective for PDE5 than PDE4.	Metabolism	C33H40O15	Free Base	N/A	COC1=CC=C(C=C1)C1=C(OC2O[C@@H](C)[C@H](O)[C@@H](O)[C@H]2O)C(=O)C2=C(O1)C(CC=C(C)C)=C(OC1O[C@H](CO)[C@@H](O)[C@H](O)[C@H]1O)C=C2O |r,c:4,6,9,25,49,t:2,34|	0.983	7	8	9
S2313	Indole-3-carbinol	147.18	700-06-1	NF-κB	http://www.selleckchem.com/products/Indole-3-carbinol.html	Indole-3-carbinol is produced by the breakdown of the glucosinolate glucobrassicin, which can be found at relatively high levels in cruciferous vegetables.	Others	C9H9NO	Free Base	N/A	OCC1=CNC2=C1C=CC=C2 |c:5,8,10,t:2|	1.518	0	2	1
S2314	Kaempferol	286.23	520-18-3	Estrogen/progestogen Receptor	http://www.selleckchem.com/products/Kaempferol.html	Kaempferol is a natural flavonol, a type of flavonoid, that has been isolated from plant sources.	Others	C15H10O6	Free Base	N/A	OC1=CC=C(C=C1)C1=C(O)C(=O)C2=C(O)C=C(O)C=C2O1 |c:3,5,8,13,19,t:1,16|	1.872	2	4	1
S2316	Kinetin	215.21	525-79-1	Others	http://www.selleckchem.com/products/Kinetin(6-Furfuryladenine).html	Kinetin is a type of cytokinin, a class of plant hormone that promotes cell division.	Others	C10H9N5O	Free Base	6-Furfuryladenine, N6-Furfuryladenine, 6-Furfurylaminopurine,Cytokinin	C(NC1=NC=NC2=C1NC=N2)C1=CC=CO1 |c:4,6,10,15,t:2,13|	0.875	4	2	3
S2317	L-(+)-Rhamnose Monohydrate	182.17	10030-85-0	Others	http://www.selleckchem.com/products/L(+)-Rhamnose-Monohydrate.html	L(+)-Rhamnose (Rham) is a naturally-occurring deoxy sugar that is found primarily in plants and some bacteria.	Others	C6H14O6	Monohydrate	N/A	O.C[C@@H]1OC(O)[C@H](O)[C@H](O)[C@H]1O |r|	-1.833	1	3	0
S2319	Limonin	470.51	1180-71-8	HIV Protease	http://selleckchem.com/products/Limonin.html	Limonin is a triterpenoid enriched in citrus fruits, which has antivirus and antitumor ability.	Microbiology	C26H30O8	Free Base	N/A	[H][C@]12CC(=O)OC[C@@]11[C@@]([H])(CC(=O)[C@]3(C)[C@]1([H])CC[C@@]1(C)[C@@H](OC(=O)[C@H]4O[C@@]314)C1=COC=C1)C(C)(C)O2 |r,c:36,t:33|	1.447	8	0	1
S2320	Luteolin	286.24	491-70-3	PDE	http://www.selleckchem.com/products/Luteolin(Luteolol).html	Luteolin is a flavonoid found in Terminalia chebula, which is a non-selective phisphodiesterase PDE inhibitor for PDE1-5 with Ki of 15.0 &mu;M, 6.4 &mu;M, 13.9 &mu;M, 11.1 &mu;M and 9.5 &mu;M, respectively.	Metabolism	C15H10O6	Free Base	3',4',5,7-Tetrahydroxyflavone, Luteoline, Luteolol	OC1=CC(O)=C2C(=O)C=C(OC2=C1)C1=CC=C(O)C(O)=C1 |c:8,12,21,t:1,4,15,17|	2.168	2	4	1
S2321	Magnolol	266.33	528-43-8	NF-κB	http://www.selleckchem.com/products/Magnolol(2,2-Bichavicol).html	Magnolol is a bioactive lignin found in the bark of the Houpu magnolia (Magnolia officinalis) which shows antifungal properties.	Others	C18H18O2	Free Base	2,2'-Bichavicol	OC1=CC=C(CC=C)C=C1C1=C(O)C=CC(CC=C)=C1 |c:8,11,14,19,t:1,3|	4.88	0	2	5
S2322	(+)-Matrine	248.36	519-02-8	Opioid Receptor	http://www.selleckchem.com/products/Matrine((+)-Matrine).html	Matrine((+)-Matrine) is an alkaloid found in plants from the Sophora family, which has a variety of pharmacological effects, including anti-cancer effects, and action as a kappa opioid receptor agonist.	Neuronal Signaling	C15H24N2O	Free Base	(+)-Matrine	[H][C@]12CCCN3CCC[C@]([H])([C@@]4([H])CCCC(=O)N4C1)[C@]23[H] |r|	1.417	1	0	0
S2323	Methyl-Hesperidin	642.6	11013-97-1	Others	http://www.selleckchem.com/products/Methyl-Hesperidin.html	Methyl Hesperidin is a flavanone glycoside (flavonoid) (C28H34O15) found abundantly in citrus fruits. Its aglycone form is called hesperetin.	Others	C29H38O16	Free Base	N/A	CO.COC1=CC=C(C=C1O)[C@@H]1CC(=O)C2=C(O)C=C(O[C@@H]3O[C@H](CO[C@@H]4O[C@@H](C)[C@H](O)[C@@H](O)[C@H]4O)[C@@H](O)[C@H](O)[C@H]3O)C=C2O1 |r,c:5,7,15,44,t:3,18|	-0.79	7	8	7
S2325	Morin Hydrate	320.25	6202-27-3	Others	http://www.selleckchem.com/products/Morin-hydrate(Aurantica).html	Morin hydrate(Aurantica) is a flavonoid isolated from Maclura pomifera (Osage orange), Maclura tinctoria (old fustic) and from leaves of Psidium guajava (common guava).	Others	C15H12O8	Hydrate	N/A	O.OC1=CC=C(C(O)=C1)C1=C(O)C(=O)C2=C(O)C=C(O)C=C2O1 |c:3,6,9,14,20,t:1,17|	1.423	2	5	1
S2326	Myricetin	318.24	529-44-2	MEK	http://www.selleckchem.com/products/Myricetin(Cannabiscetin).html	Myricetin(Cannabiscetin) is a flavonoid found in many grapes, berries, fruits, vegetables, herbs, as well as other plants, which has antioxidant and anti tumor properties.	Others	C15H10O8	Free Base	Cannabiscetin, Myricetol, Myricitin	OC1=CC(O)=C2C(=O)C(O)=C(OC2=C1)C1=CC(O)=C(O)C(O)=C1 |c:9,13,23,t:1,4,16,19|	1.388	2	6	1
S2327	Myricitrin	464.38	17912-87-7	PKC	http://www.selleckchem.com/products/Myricitrin(Myricitrine).html	Myricitrin, a flavonoid compound isolated from the root bark of Myrica cerifera, which exerts antinociceptive effects.	Others	C21H20O12	Free Base	Myricitrine, Myricitroside, Myricetol 3-rhamnoside, Myricetin 3-O-rhamnoside	C[C@@H]1O[C@@H](OC2=C(OC3=CC(O)=CC(O)=C3C2=O)C2=CC(O)=C(O)C(O)=C2)[C@H](O)[C@H](O)[C@H]1O |r,c:11,14,27,t:5,8,20,23|	0.347	4	8	3
S2328	Nalidixic acid	232.24	389-08-2	Topoisomerase	http://www.selleckchem.com/products/Nalidixic-acid(NegGram).html	Nalidixic acid(NegGram) is a synthetic 1,8-naphthyridine antimicrobial agent with a limited bacteriocidal spectrum. It is an inhibitor of the A subunit of bacterial DNA gyrase.	Others	C12H12N2O3	Free Base	NegGram, Nevigramon, Nalidixin, Uronidix	CCN1C=C(C(O)=O)C(=O)C2=C1N=C(C)C=C2 |c:10,16,t:3,13|	1.176	3	0	2
S2329	Naringin	580.53	10236-47-2	P450 (e.g. CYP17)	http://www.selleckchem.com/products/Naringin(Naringoside).html	Naringin is a flavanone glycoside, which exerts a variety of pharmacological effects such as antioxidant activity, blood lipid lowering, anticancer activity, and inhibition of cytochrome P450 enzymes.	PI3K/Akt/mTOR	C27H32O14	Free Base	Naringoside, Naringenine-7-rhamnosidoglucoside	C[C@@H]1O[C@@H](O[C@@H]2[C@@H](O)[C@H](O)[C@@H](CO)O[C@H]2OC2=CC(O)=C3C(=O)C[C@H](OC3=C2)C2=CC=C(O)C=C2)[C@H](O)[C@H](O)[C@H]1O |r,c:28,36,t:17,20,31,33|	-0.415	6	8	6
S2331	Neohesperidin Dihydrochalcone (Nhdc)	612.58	20702-77-6	Others	http://www.selleckchem.com/products/Neohesperidin-dihydrochalcone(Nhdc).html	Neohesperidin dihydrochalcone (Nhdc), sometimes abbreviated to neohesperidin DC or simply NHDC, is an artificial sweetener derived from citrus.	Others	C28H36O15	Free Base	Nhdc, Neohesperidin dc, Neohesperidin dhc	COC1=C(O)C=C(CCC(=O)C2=C(O)C=C(O[C@@H]3O[C@H](CO)[C@@H](O)[C@H](O)[C@H]3O[C@@H]3O[C@@H](C)[C@H](O)[C@@H](O)[C@H]3O)C=C2O)C=C1 |r,c:2,11,40,44,t:5,14|	-0.048	6	9	10
S2332	Neohesperidin	610.56	13241-33-3	ROS	http://www.selleckchem.com/products/Neohesperidin.html	Neohesperidin, a flavanone glycoside found in citrus fruits, is an antioxidant agent.	Others	C28H34O15	Free Base	N/A	COC1=CC(O)=CC(=C1)[C@@H]1CC(=O)C2=C(O)C=C(O[C@@H]3O[C@H](CO)[C@@H](O)[C@H](O)[C@H]3O[C@@H]3O[C@@H](C)[C@H](O)[C@@H](O)[C@H]3O)C=C2O1 |r,c:5,7,14,43,t:2,17|	-0.431	7	8	7
S2333	Nobiletin	402.39	478-01-3	MMP	http://www.selleckchem.com/products/Nobiletin(Hexamethoxyflavone).html	Nobiletin, a citrus flavonoid isolated from citrus peels like in tangerine, which has anti-inflammatory and anti-tumor activities.	Others	C21H22O8	Free Base	N/A	COC1=C(OC)C=C(C=C1)C1=CC(=O)C2=C(OC)C(OC)=C(OC)C(OC)=C2O1 |c:2,6,8,15,27,t:11,21|	3.038	8	0	7
S2334	Oleanolic Acid	456.7	508-02-1	Antifection	http://www.selleckchem.com/products/Oleanolic-Acid(Caryophyllin).html	Oleanolic Acid is a non-toxic, hepatoprotective triterpenoid found in Phytolacca Americana, which exerts antitumor and antiviral properties.	Others	C30H48O3	Free Base	Caryophyllin, Astrantiagenin C, Giganteumgenin C, Virgaureagenin B	[H][C@@]12CC(C)(C)C[C@H](C1CC[C@]1(C)C2=CC[C@]2([H])[C@@]3(C)CC[C@H](O)C(C)(C)[C@]3([H])CC[C@@]12C)C(O)=O |r,t:15|	6.282	1	1	1
S2335	Oridonin	364.43	28957-04-2	Others	http://selleckchem.com/products/Oridonin(Isodonol).html	Oridonin, a diterpenoid purified from Rabdosia rubescens, is an antitumor agent.	Others	C20H28O6	Free Base	Isodonol	[H][C@@]12CCC3[C@@]([C@@H]1O)(C(=O)C2=C)[C@]1(O)OC[C@]32[C@@H](O)CCC(C)(C)[C@@]2([H])[C@@H]1O |r|	0.2	2	3	0
S2336	Orotic acid (6-Carboxyuracil)	156.1	65-86-1	Others	http://www.selleckchem.com/products/Orotic-acid(6-Carboxyuracil).html	Orotic acid(6-Carboxyuracil) is a heterocyclic compound and an acid.	Others	C5H4N2O4	Free Base	6-Carboxyuracil, Orodin, Oropur, Orotonin, Orotonsan	OC(=O)C1=CC(=O)NC(=O)N1 |t:3|	-1.152	3	2	1
S2337	Osthole	244.29	484-12-8	Others	http://www.selleckchem.com/products/Osthole(Osthol).html	Osthol is an O-methylated coumarin, which is found in the plants such as Cnidium monnieri, Angelica archangelica and Angelica pubescens.	Others	C15H16O3	Free Base	Osthol, Ostole, Ostol	COC1=CC=C2C=CC(=O)OC2=C1CC=C(C)C |c:6,12,t:2,4|	3.74	3	0	3
S2338	Oxymatrine	264.36	16837-52-8	Others	http://www.selleckchem.com/products/Oxymatrine(Matrine-N-oxide).html	Oxymatrine is a quinolizidine alkaloid extracted from the root of Sophora flavescens, which is used for the treatment of viral hepatitis, cancer, viral myocarditis, gastrointestinal hemorrhage and skin diseases.	Others	C15H24N2O2	Free Base	Matrine N-oxide, Matrine oxide, Matrine 1beta-oxide	[H][C@]12CCC[N+]3([O-])CCC[C@]([H])([C@@]4([H])CCCC(=O)N4C1)[C@]23[H] |r|	0.61	1	0	0
S2339	Paeonol	166.17	552-41-0	MAO	http://www.selleckchem.com/products/Paeonol(Peonol).html	Paeonol (Peonol), a phenolic compound extracted from Chinese herbs Paeonia suffruticosa (moutan cortex) and Cynanchum paniculatum, inhibits MAO with an IC50 of about 50 &mu;M.	Others	C9H10O3	Free Base	Peonol	COC1=CC(O)=C(C=C1)C(C)=O |c:5,7,t:2|	1.311	2	1	2
S2341	(-)-Parthenolide	248.32	20554-84-1	HDAC,NF-κB,Mdm2,p53	http://www.selleckchem.com/products/Parthenolide((-)-Parthenolide).html	(-)-Parthenolide is a sesquiterpene lactone which occurs naturally in the plant feverfew(Tanacetum parthenium) and also promotes the ubiquitination of MDM2 and activates p53 cellular functions.	Ubiquitin	C15H20O3	Free Base	N/A	CC1=CCC[C@@]2(C)O[C@H]2[C@H]2OC(=O)C(=C)[C@@H]2CC1 |r|	2.923	3	0	0
S2342	Phloretin	274.27	60-82-2	SGLT	http://www.selleckchem.com/products/Phloretin(Dihydronaringenin).html	Phloretin is a dihydrochalcone found in apple tree leaves, which shows beneficial effects on diabetes.	Others	C15H14O5	Free Base	Dihydronaringenin, Phloretol	OC1=CC=C(CCC(=O)C2=C(O)C=C(O)C=C2O)C=C1 |c:9,15,19,t:1,3,12|	2.757	1	4	4
S2343	Phlorizin	436.41	60-81-1	SGLT	http://www.selleckchem.com/products/Phlorizin(Phloridzin).html	Phlorizin is a dihydrochalcone found in the bark of pear (Pyrus communis), apple, cherry and other fruit trees.	Others	C21H24O10	Free Base	Phlorhizin, Phlorizoside	OC[C@H]1O[C@@H](OC2=C(C(=O)CCC3=CC=C(O)C=C3)C(O)=CC(O)=C2)[C@H](O)[C@@H](O)[C@@H]1O |r,c:6,17,21,24,t:12,14|	0.827	3	7	7
S2344	Piperine	285.34	94-62-2	P450 (e.g. CYP17)	http://www.selleckchem.com/products/Piperine(1-Piperoylpiperidine).html	Piperine (1-Piperoylpiperidine) is the alkaloid responsible for the pungency of black pepper and long pepper, which has also been used in some forms of traditional medicine and as an insecticide.	Others	C17H19NO3	Free Base	Piperin	O=C(\C=C\C=C\C1=CC2=C(OCO2)C=C1)N1CCCCC1 |c:14,t:6,8|	2.864	3	0	3
S2346	Puerarin	416.38	3681-99-0	5-HT Receptor	http://www.selleckchem.com/products/Puerarin(Kakonein).html	Puerarin (Kakonein), an isoflavones found in the root of Radix puerariae, is a 5-HT2C receptor and benzodiazepine site antagonist.	Others	C21H20O10	Free Base	NPI-31G	OC[C@H]1O[C@@H](OC2=C(O)C=CC3=C2OC=C(C3=O)C2=CC=C(O)C=C2)[C@H](O)[C@@H](O)[C@@H]1O |r,c:6,9,11,15,25,t:20,22|	0.21	4	6	4
S2347	Quercetin Dihydrate	338.27	6151-25-3	Others	http://www.selleckchem.com/products/Quercetin-dihydrate(Sophoretin).html	Quercetin, a polyphenolic flavonoid found in a wide variety of plant-based foods, such as apples, onions, berries, and red wine, is utilized in many different cultures for their nervous system and anticancer effects.	Others	C15H14O9	Dihydrate	Sophoretin, Meletin, Quercetine, Xanthaurine, Quercetol, Quercitin	O.O.OC1=CC(O)=C2C(=O)C(O)=C(OC2=C1)C1=CC=C(O)C(O)=C1 |c:9,13,22,t:1,4,16,18|	1.216	2	5	1
S2349	Rutaecarpine	287.32	84-26-4	COX	http://www.selleckchem.com/products/Rutaecarpine(Rutecarpine).html	Rutaecarpine is an indolopyridoquinazolinone alkaloid isolated from Evodia rutaecarpa and related herbs.	Others	C18H13N3O	Free Base	Rutecarpine, Rutacarpine, Rutaecarpin, Rhetine	O=C1N2CCC3=C(NC4=C3C=CC=C4)C2=NC2=C1C=CC=C2 |c:8,11,13,17,19,22,24,t:5|	3.359	2	1	0
S2350	Rutin	610.52	153-18-4	Immunology & Inflammation related	http://www.selleckchem.com/products/Rutin(Rutoside).html	Rutin, a flavonol glycoside found in many plants including buckwheat; tobacco; forsythia; hydrangea; viola, etc., which possesses healthy effects for human.	Others	C27H30O16	Free Base	Quercetin 3-rutinoside, Rutin trihydrate, Phytomelin, Birutan, Sophorin, Venoruton, Eldrin	C[C@@H]1O[C@@H](OC[C@H]2O[C@@H](OC3=C(OC4=C(C3=O)C(O)=CC(O)=C4)C3=CC(O)=C(O)C=C3)[C@H](O)[C@@H](O)[C@@H]2O)[C@H](O)[C@H](O)[C@H]1O |r,c:13,19,22,31,t:10,25,28|	-1.158	6	10	6
S2351	Salicin	286.28	138-52-3	COX	http://www.selleckchem.com/products/Salicin(Salicoside,-Salicine).html	Salicin is a phenol β-glycosid produced from willow bark that shows anti-inflammatory effects.	Others	C13H18O7	Free Base	Salicoside, Salicine	OC[C@H]1O[C@@H](OC2=CC=CC=C2CO)[C@H](O)[C@@H](O)[C@@H]1O |r,c:8,10,t:6|	-0.947	2	5	4
S2354	Sclareol	308.5	515-03-7	Others	http://www.selleckchem.com/products/Sclareol.html	Sclareol, a labdane-type diterpene isolated from clary sage (Salvia sclarea), exerts growth inhibition and cytotoxic activity against a variety of human cancer cell lines.	Others	C20H36O2	Free Base	N/A	CC(O)(CC[C@H]1[C@](C)(O)CCC2C(C)(C)CCC[C@]12C)C=C |r|	4.27	0	0	4
S2355	Sclareolide	250.38	564-20-5	Others	http://www.selleckchem.com/products/Sclareolide(Norambreinolide).html	Sclareolide(Norambreinolide) is a sesquiterpene lactone natural product derived from various plant sources including Salvia sclarea, Salvia yosgadensis, and cigar tobacco.	Others	C16H26O2	Free Base	Norambreinolide	[H][C@]12CC(=O)O[C@]1(C)CC[C@@]1([H])C(C)(C)CCC[C@]21C |r|	3.495	2	0	0
S2356	Shikimic Acid	174.15	138-59-0	Others	http://www.selleckchem.com/products/Shikimic-acid(Shikimate).html	Shikimic acid(Shikimate), more commonly known as its anionic form shikimate, is an important biochemical intermediate in plants and microorganisms.	Others	C7H10O5	Free Base	Shikimate, Bracken fern toxic component, L-Shikimic acid	O[C@@H]1CC(=CC(O)C1O)C(O)=O |r,c:3|	-1.154	1	3	1
S2357	Silibinin	482.44	22888-70-6	Others	http://www.selleckchem.com/products/Silibinin(Silybin).html	Silibinin, the main flavonoid extracted from the milk thistle Silybum marianum, displays hepatoprotective properties in acute and chronic liver injury.	Others	C25H22O10	Free Base	Silybin	COC1=CC(=CC=C1O)[C@H]1OC2=CC(=CC=C2O[C@@H]1CO)[C@H]1OC2=CC(O)=CC(O)=C2C(=O)[C@@H]1O |r,c:4,6,14,16,29,32,t:2,12,26|	2.592	5	5	4
S2358	Silymarin	482.44	65666-07-1	Others	http://www.selleckchem.com/products/Silymarin(Silybin-B).html	Silymarin (Silybin B), a polyphenolic flavonoid extracted from the seeds of Silybum marianum or milk thistle, is used in the prevention and treatment of liver diseases and primary liver cancer.	Others	C25H22O10	Free Base	Silybin B, Silibinin B	COC1=CC(=CC=C1O)C1OC2=CC=C(C=C2OC1CO)C1OC2=C(C(=O)C1O)C(O)=CC(O)=C2 |c:4,6,14,16,26,34,37,t:2,12|	2.592	5	5	4
S2359	Sinomenine	329.39	115-53-7	Others	http://www.selleckchem.com/products/Sinomenine(Cucoline).html	Sinomenine, a pure alkaloid extracted from the chinese medical plant Sinomenium acutum, is used for the treatment of rheumatism and arthritis.	Others	C19H23NO4	Free Base	Cucoline, Kukoline, Coculine, Sabianine A	[H][C@]12C=C(OC)C(=O)C[C@]11CCN(C)[C@H]2CC2=C1C(O)=C(OC)C=C2 |r,c:18,26,t:2,22|	1.674	3	1	2
S2362	Synephrine	167.21	94-07-5	Adrenergic Receptor	http://www.selleckchem.com/products/Synephrine(Oxedrine).html	Synephrine, a natural protoalkaloid in the extract of bitter orange and other citrus species, is commonly used for weight loss.	GPCR & G Protein	C9H13NO2	Free Base	Oxedrine, p-Synephrine, Sympatol, Parasympatol, Sympaethamine	CNCC(O)C1=CC=C(O)C=C1 |c:10,t:5,7|	0.615	0	3	3
S2363	Tangeretin	372.37	481-53-8	ROS	http://www.selleckchem.com/products/Tangeretin(Tangeritin).html	Tangeretin, a natural polymethoxylated flavone concentrated in the peel of citrus fruits, is known to have antiproliferative, antiinvasive, antimetastatic and antioxidant activities.	Others	C20H20O7	Free Base	Tangeritin, Ponkanetin, Pentamethoxyflavone	COC1=CC=C(C=C1)C1=CC(=O)C2=C(OC)C(OC)=C(OC)C(OC)=C2O1 |c:4,6,13,25,t:2,9,19|	3.054	7	0	6
S2364	Tanshinone I	276.29	568-73-0	Phospholipase (e.g. PLA)	http://selleckchem.com/products/Tanshinone-I.html	Tanshinone I, an active principle isolated from Salvia miltiorrhiza (Danshen), is structurally similar to tanshinone IIA and may possess similar cytotoxic effects on tumor cells.	Metabolism	C18H12O3	Free Base	N/A	CC1=COC2=C1C(=O)C(=O)C1=C2C=CC2=C(C)C=CC=C12 |c:4,11,14,16,19,t:1,21|	4.084	3	0	0
S2365	Tanshinone IIA	294.34	568-72-9	Lipase	http://www.selleckchem.com/products/Tanshinone-IIA(Tanshinone-B).html	Tanshinone IIA(Tanshinone B) is the most abundant diterpene quinone in Danshen, Salviae miltiorrhizae Radix, a widely prescribed traditional herbal medicine that is used to treat cardiovascular and inflammatory diseases.	Others	C19H18O3	Free Base	Tanshinone B, Tanshinone II	CC1=COC2=C1C(=O)C(=O)C1=C2C=CC2=C1CCCC2(C)C |c:4,11,14,16,t:1|	4.66	3	0	0
S2366	Taxifolin (Dihydroquercetin)	304.25	480-18-2	VEGFR	http://www.selleckchem.com/products/Taxifolin(Dihydroquercetin).html	Taxifolin is a flavonoid in many plants such as Taxus chinensis, Siberian larch, Cedrus deodara and so on.	Others	C15H12O7	Free Base	Dihydroquercetin, Taxifolin-(+)	O[C@@H]1[C@H](OC2=CC(O)=CC(O)=C2C1=O)C1=CC(O)=C(O)C=C1 |r,c:7,10,22,t:4,16,19|	1.479	2	5	1
S2367	Tetrahydropapaverine HCl	379.88	6429-04-5	Hydroxylase	http://www.selleckchem.com/products/Tetrahydropapaverine-hydrochloride.html	Tetrahydropapaverine, one of the TIQs and an analogue of salsolinol and tetrahydropapaveroline, has been reported to have neurotoxic effects on dopamine neurons.	Others	C20H26ClNO4	Hydrochloride	N/A	Cl.COC1=CC=C(CC2NCCC3=CC(OC)=C(OC)C=C23)C=C1OC |c:23,t:2,4,11,15,19|	3.692	4	1	6
S2369	Troxerutin	742.68	7085-55-4	Thrombin	http://www.selleckchem.com/products/Troxerutin.html	Troxerutin (Trihydroxyethylrutin), a natural bioflavonoid isolated from Sophora japonica., has been reported to have many benefits and medicinal properties.	Others	C33H42O19	Free Base	Trihydroxyethylrutin, Troxerutin	C[C@@H]1O[C@@H](OC[C@H]2O[C@@H](OC3=C(OC4=CC(OCCO)=CC(O)=C4C3=O)C3=CC(OCCO)=C(OCCO)C=C3)[C@H](O)[C@@H](O)[C@@H]2O)[C@H](O)[C@H](O)[C@H]1O |r,c:19,22,40,t:10,13,28,34|	-2.1	9	10	15
S2370	Ursolic Acid	456.7	77-52-1	Others	http://www.selleckchem.com/products/Ursolic-acid(Malol).html	Ursolic acid (Malol) is a pentacyclic triterpene acid, used in cosmetics.	Others	C30H48O3	Free Base	Malol, Prunol, Urson	[H][C@@]12[C@@H](C)[C@H](C)C[C@H](C1CC[C@]1(C)C2=CC[C@]2([H])[C@@]3(C)CC[C@H](O)C(C)(C)[C@]3([H])CC[C@@]12C)C(O)=O |r,t:15|	6.327	1	1	1
S2371	Vanillylacetone	194.23	122-48-5	Others	http://www.selleckchem.com/products/Vanillylacetone.html	Vanillylacetone is similar in chemical structure to other flavor chemicals such as vanillin and eugenol and is used as a flavor additive in spice oils and in perfumery to introduce spicy aromas.	Others	C11H14O3	Free Base	N/A	COC1=CC(CCC(C)=O)=CC=C1O |c:9,11,t:2|	1.792	2	1	4
S2372	Xanthone	196.2	90-47-1	Others	http://www.selleckchem.com/products/Xanthone(Genicide).html	Xanthone is an organic compound, which can be prepared by the heating of phenyl salicylate.	Others	C13H8O2	Free Base	Genicide, Benzophenone oxide, Diphenylene ketone oxide	O=C1C2=CC=CC=C2OC2=C1C=CC=C2 |c:4,6,10,13,15,t:2|	2.964	2	0	0
S2373	Yohimbine HCl	390.9	65-19-0	Adrenergic Receptor	http://www.selleckchem.com/products/Yohimbine-hydrochloride(Antagonil).html	Yohimbine has been used as a mydriatic and in the treatment of impotence. It is also alleged to be an aphrodisiac.	Others	C21H27ClN2O3	Hydrochloride	Antagonil, Yohimbe, Aphrodine hydrochloride, Yohimbine monohydrochloride	Cl.[H][C@@]12CC[C@H](O)[C@H](C(=O)OC)[C@@]1([H])C[C@]1([H])N(CCC3=C1NC1=C3C=CC=C1)C2 |r,c:20,24,27,29|	3.204	2	2	2
S2374	5-hydroxytryptophan (5-HTP)	220.22	56-69-9	Others	http://www.selleckchem.com/products/5-hydroxytryptophan(5-HTP).html	5-Hydroxytryptophan (5-HTP), also known as oxitriptan (INN), is a naturally occurring amino acid and chemical precursor for the treatment of depression.	Others	C11H12N2O3	Free Base	N/A	NC(CC1=CNC2=CC=C(O)C=C12)C(O)=O |t:3,6,8,11|	-1.554	1	3	3
S2375	Aloin	418.39	1415-73-2	Tyrosinase	http://www.selleckchem.com/products/Aloin(Barbaloin).html	Aloin, a natural anthracycline from Aloe vera, is a tyrosinase inhibitor.	Others	C21H22O9	Free Base	Barbaloin	[H][C@]1(O[C@H](CO)[C@@H](O)[C@H](O)[C@H]1O)[C@@]1([H])C2=C(C(O)=CC=C2)C(=O)C2=C1C=C(CO)C=C2O |r,c:18,20,25,32,t:15,28|	-0.404	2	7	3
S2376	Ammonium Glycyrrhizinate	839.96	1407-03-0	Dehydrogenase	http://www.selleckchem.com/products/Ammonium-Glycyrrhizinate(AMGZ).html	Ammonium Glycyrrhizinate inhibits growth and cytopathology of several unrelated DNA and RNA viruses.	Metabolism	C42H65NO16	Glycyrrhizic acid salt	AMGZ	N.[H][C@@]1(O[C@@H]2[C@@H](O)[C@H](O)[C@H](O[C@]2([H])O[C@H]2CC[C@@]3(C)[C@@]([H])(CC[C@]4(C)[C@]3([H])C(=O)C=C3[C@]5([H])C[C@](C)(CC[C@]5(C)CC[C@@]43C)C(O)=O)C2(C)C)C(O)=O)O[C@@H]([C@@H](O)[C@H](O)[C@H]1O)C(O)=O |r,t:30|	-0.915	8	5	7
S2377	Biochanin A	284.26	491-80-5	FAAH	http://www.selleckchem.com/products/Biochanin-A(4-Methylgenistein).html	Biochanin A, an O-methylated isoflavone from Trifolium pratense, inhibits protein tyrosine kinase (PTK) of epidermal growth factor receptor with IC50 values of 91.5 &mu;M.	Others	C16H12O5	Free Base	4-Methylgenistein	COC1=CC=C(C=C1)C1=COC2=CC(O)=CC(O)=C2C1=O |c:4,6,15,18,t:2,9,12|	2.366	3	2	2
S2379	Dioscin	869.04	19057-60-4	Others	http://www.selleckchem.com/products/Dioscin(Collettiside-III).html	Dioscin is a saponin extracted and isolated from Polygonatum Zanlanscianense Pamp, showing antitumor activities.	Others	C45H72O16	Free Base	Collettiside III, CCRIS 4123	[H][C@]12C[C@@]3([H])[C@]4([H])CC=C5C[C@H](CC[C@]5(C)[C@@]4([H])CC[C@]3(C)[C@@]1([H])[C@H](C)[C@@]1(CC[C@@H](C)CO1)O2)O[C@]1([H])O[C@H](CO)[C@@H](O[C@]2([H])O[C@@H](C)[C@H](O)[C@@H](O)[C@H]2O)[C@H](O)[C@H]1O[C@]1([H])O[C@@H](C)[C@H](O)[C@@H](O)[C@H]1O |r,t:8|	1.169	8	8	7
S2380	Diosmetin	300.26	520-34-3	P450 (e.g. CYP17)	http://www.selleckchem.com/products/Diosmetin(Luteolin-4-methyl-ether).html	Diosmetin is a bioflavonoid found in spearmint, oregano, and many other plants.	Others	C16H12O6	Free Base	Luteolin 4-methyl ether	COC1=CC=C(C=C1O)C1=CC(=O)C2=C(O)C=C(O)C=C2O1 |c:4,6,14,20,t:2,10,17|	2.394	3	3	2
S2381	D-Mannitol	182.17	69-65-8	Others	http://www.selleckchem.com/products/D-Mannitol(Osmitrol).html	D-Mannitol is an osmotic diuretic agent and a weak renal vasodilator.	Others	C6H14O6	Free Base	Mannitol, Osmitrol, Osmofundin	OC[C@@H](O)[C@@H](O)[C@H](O)[C@H](O)CO |r|	-2.941	0	6	5
S2383	Gastrodin	286.28	62499-27-8	Others	http://www.selleckchem.com/products/Gastrodin(Gastrodine).html	Gastrodin, an anti-inflammatory polyphenol extracted from Chinese natural herbal Gastrodia elata Blume., benefits neurodegenerative diseases.	Others	C13H18O7	Free Base	Gastrodine	OC[C@H]1O[C@@H](OC2=CC=C(CO)C=C2)[C@H](O)[C@@H](O)[C@@H]1O |r,c:12,t:6,8|	-0.947	2	5	4
S2384	Hematoxylin	302.28	517-28-2	Others	http://www.selleckchem.com/products/Hematoxylin(Hydroxybrazilin).html	Hematoxylin (Hydroxybrazilin) is a compound that forms strongly colored complexes with certain metal ions, notably Fe(III) and Al(III) salts and a kind of stain in histology.	Others	C16H14O6	Free Base	Hydroxybrazilin, Natural Black 1	[H][C@]12C3=C(C[C@@]1(O)COC1=C2C=CC(O)=C1O)C=C(O)C(O)=C3 |r,c:2,10,13,16,24,t:20|	1.691	1	4	0
S2385	Hordenine	165.23	539-15-1	Antifection	http://www.selleckchem.com/products/Hordenine.html	Hordenine (N,N-dimethyl-4-hydroxyphenylethylamine) is a phenylethylamine alkaloid with antibacterial and antibiotic properties.	Others	C10H15NO	Free Base	N,N-dimethyl-4-hydroxyphenylethylamine	CN(C)CCC1=CC=C(O)C=C1 |c:10,t:5,7|	1.982	0	1	3
S2386	Indirubin	262.26	479-41-4	GSK-3	http://www.selleckchem.com/products/Indirubin.html	Indirubin is a potent cyclin-dependent kinases and GSK-3β inhibitor with IC50 of about 5 &mu;M and 0.6 &mu;M.	PI3K/Akt/mTOR	C16H10N2O2	Free Base	N/A	O=C1NC2=CC=CC=C2\C1=C1/NC2=C(C=CC=C2)C1=O |c:5,7,16,18,t:3,14|	1.876	2	2	0
S2387	Lappaconite HBr	665.61	97792-45-5	Others	http://selleckchem.com/products/Lappaconite-Hydrobromide.html	Lappaconite Hydrobromide is a kind of alkaloid extracted from Aconitum sinomontanum Nakai and has anti-inflammatory effects.	Others	C32H45BrN2O8	Hydrobromide	N/A	Br.[H][C@]12C[C@]3([H])[C@](O)([C@H]1OC)[C@](O)(C[C@@H]2OC)[C@H]1C[C@@]2([H])[C@]33C1N(CC)C[C@@]2(CC[C@@H]3OC)OC(=O)C1=C(NC(C)=O)C=CC=C1 |r,c:41,47,49|	0.52	6	1	8
S2388	L-carnitine	161.2	541-15-1	Others	http://www.selleckchem.com/products/L-carnitine(Levocarnitine).html	L-carnitine is constituent of striated muscle and liver. It is used therapeutically to stimulate gastric and pancreatic secretions and in the treatment of hyperlipoproteinemias.	Others	C7H15NO3	quaternary-N salt	Levocarnitine, Carnitor, vitamin BT, Karnitin	C[N+](C)(C)C[C@H](O)CC([O-])=O |r|	-3.29	0	1	4
S2389	Naringin Dihydrochalcone	582.55	18916-17-1	Phospholipase (e.g. PLA)	http://www.selleckchem.com/products/Naringin-Dihydrochalcone(Naringin-DC).html	Naringin Dihydrochalcone(Naringin DC) is a new-style sweetening agent and an artificial sweetener derived from naringin.	Others	C27H34O14	Free Base	Naringin DC	[H][C@@]1(O[C@@H]2[C@@H](O)[C@H](O)[C@@H](CO)O[C@H]2OC2=CC(O)=C(C(=O)CCC3=CC=C(O)C=C3)C(O)=C2)O[C@@H](C)[C@H](O)[C@@H](O)[C@H]1O |r,c:29,33,t:15,18,24,26|	-0.032	5	9	9
S2390	Polydatin	390.38	65914-17-2	Phospholipase (e.g. PLA)	http://www.selleckchem.com/products/Polydatin(Piceid).html	Polydatin is a crystal component extracted from the root stem of perennial herbage Polygonum Cuspidatum Sieb.et Zucc.	Others	C20H22O8	Free Base	Piceid, 3,4,5-Tsg, 3,4,5-Trihydroxystilbene-3-beta-monoglucoside	OC[C@H]1O[C@@H](OC2=CC(O)=CC(\C=C\C3=CC=C(O)C=C3)=C2)[C@H](O)[C@@H](O)[C@@H]1O |r,c:9,19,21,t:6,14,16|	1.16	2	6	5
S2391	Quercetin	302.24	117-39-5	Src,Sirtuin,PKC,PI3K	http://www.selleckchem.com/products/Quercetin(Sophoretin).html	Quercetin is a natural flavonoid present in vegetables, fruit and wine and is a PI3K inhibitor with IC50 of 2.4 – 5.4 &mu;M.	Epigenetics	C15H10O7	Free Base	Meletin, Quercetine	OC1=CC(O)=C2C(=O)C(O)=C(OC2=C1)C1=CC=C(O)C(O)=C1 |c:9,13,22,t:1,4,16,18|	1.63	2	5	1
S2392	Sesamin	354.35	607-80-7	Others	http://www.selleckchem.com/products/Sesamin(Fagarol).html	Sesamin, a lignan isolated from the bark of Fagara plants and from sesame oil, exhibits various health benefits.	Others	C20H18O6	Free Base	Fagarol, Sezamin	[H][C@]12CO[C@H](C3=CC4=C(OCO4)C=C3)[C@@]1([H])CO[C@@H]2C1=CC2=C(OCO2)C=C1 |r,c:13,31,t:5,7,23,25|	2.237	6	0	2
S2393	Sorbitol	182.17	50-70-4	Others	http://www.selleckchem.com/products/Sorbitol(Glucitol).html	Sorbitol is a sugar alcohol and a sugar substitute.	Others	C6H14O6	Free Base	Glucitol	OC[C@H](O)[C@@H](O)[C@H](O)[C@H](O)CO |r|	-2.941	0	6	5
S2394	Naringenin	272.25	480-41-1	P450 (e.g. CYP17)	http://www.selleckchem.com/products/Naringenin.html	Naringenin is a natural predominant flavanone derived from plant food, which is considered to have a bioactive effect on human health as antioxidant, free radical scavenger, anti-inflammatory, carbohydrate metabolism promoter, and immune system modulator.	Metabolism	C15H12O5	Free Base	N/A	OC1=CC=C(C=C1)[C@@H]1CC(=O)C2=C(O)C=C(O)C=C2O1 |r,c:3,5,12,18,t:1,15|	2.373	2	3	1
S2396	Salidroside	300.3	10338-51-9	Others	http://www.selleckchem.com/products/Salidroside-Rhodioloside.html	Salidroside, a phenylpropanoid glycoside isolated from Rhodiola rosea, has been reported to have a broad spectrum of pharmacological properties.	Others	C14H20O7	Free Base	Rhodioloside	OC[C@H]1O[C@@H](OCCC2=CC=C(O)C=C2)[C@H](O)[C@@H](O)[C@@H]1O |r,c:13,t:8,10|	-0.443	2	5	5
S2397	Palmatine chloride	387.86	10605-02-4	Others	http://www.selleckchem.com/products/Palmatine-chloride.html	Palmatine hydrochloride (Palmatine chloride (6CI,7CI); Fibrauretin) is a hydrochloride salt of palmatine which is a protoberberine alkaloid.	Others	C21H22ClNO4	Chloride	Palmatine hydrochloride	[Cl-].COC1=CC=C2C=C3C4=C(CC[N+]3=CC2=C1OC)C=C(OC)C(OC)=C4 |c:8,13,16,27,t:2,4,6,21|	1.488	4	0	4
S2399	Dihydromyricetin	320.25	27200-12-0	GABA Receptor	http://selleckchem.com/products/Dihydromyricetin-Ampeloptin.html	Dihydromyricetin (Ampelopsin, Ampeloptin) is a natural antioxidant flavonoid from Ampelopsis grossedentata.	Neuronal Signaling	C15H12O8	Free Base	Ampeloptin, Ampelopsin,(+)-Ampelopsin, (+)-Dihydromyricetin	O[C@@H]1[C@H](OC2=CC(O)=CC(O)=C2C1=O)C1=CC(O)=C(O)C(O)=C1 |r,c:7,10,23,t:4,16,19|	1.237	2	6	1
S2401	Sodium Danshensu	220.15	67920-52-9	P450 (e.g. CYP17)	http://www.selleckchem.com/products/Sodium-Danshensu.html	Sodium Danshensu is a mono sodium of danshensu, which is a natural phenolic acid of caffeic acid derivatives isolated from Salvia miltiorrhiza.	Others	C9H9NaO5	Sodium Salt	N/A	[Na+].OC(CC1=CC(O)=C(O)C=C1)C([O-])=O |c:9,t:3,6|	-0.795	0	3	3
S2404	Isoliquiritigenin	256.25	961-29-5	Others	http://www.selleckchem.com/products/Isoliquiritigenin.html	Isoliquiritigenin, an anti-tumor flavonoid from the root of Glycyrrhiza glabra, inhibits aldose reductase with an IC50 of 320 nM.	Others	C15H12O4	Free Base	N/A	OC1=CC=C(\C=C\C(=O)C2=C(O)C=C(O)C=C2)C=C1 |c:9,15,18,t:1,3,12|	2.975	1	3	3
S2405	Sophocarpine	246.35	6483-15-4	Others	http://selleckchem.com/products/Sophocarpine.html	Sophocarpine, a major ingredient of Sophora alopecuroides, has a wide range of pharmacological effects.	Others	C15H22N2O	Free Base	N/A	[H][C@]12CCCN3CCC[C@]([H])([C@@]4([H])CC=CC(=O)N4C1)[C@]23[H] |r,c:14|	1.394	1	0	0
S2406	Chrysophanic Acid	254.24	481-74-3	EGFR,mTOR	http://www.selleckchem.com/products/Chrysophanic-acid-Chrysophanol.html	Chrysophanic acid (Chrysophanol), a natural anthraquinone isolated from Dianella longifolia, is a EGFR/mTOR pathway inhibitor.	Protein Tyrosine Kinase	C15H10O4	Free Base	Chrysophanol, NSC 37132, NSC 646567	CC1=CC2=C(C(O)=C1)C(=O)C1=C(O)C=CC=C1C2=O |c:3,6,11,14,16,t:1|	2.81	2	2	0
S2407	Curcumol	236.35	4871-97-0	JAK	http://www.selleckchem.com/products/Curcumol.html	Curcumol is a pure monomer isolated from Rhizoma Curcumaeis with antitumor activities.	Others	C15H24O2	Free Base	N/A	[H][C@@]12CC[C@H](C)[C@@]11C[C@@H](C(C)C)[C@@](O)(CC2=C)O1 |r|	2.786	1	0	1
S2408	Cephalomannine	831.9	71610-00-9	Others	http://www.selleckchem.com/products/cephalomannine.html	Cephalomannine is an active anti-cancer agent obtained from Taxus yunnanensis and has an antineoplastic effect on tumors found in mice.	Others	C45H53NO14	Free Base	N/A	[H][C@]12[C@H](OC(=O)C3=CC=CC=C3)[C@]3(O)C[C@H](OC(=O)[C@H](O)[C@@H](NC(=O)C(\C)=C\C)C4=CC=CC=C4)C(C)=C([C@@H](OC(C)=O)C(=O)[C@]1(C)[C@@H](O)C[C@H]1OC[C@@]21OC(C)=O)C3(C)C |r,c:8,10,32,34,t:6,30,38|	2.937	11	3	14
S2409	10-Deacetylbaccatin-III	544.59	32981-86-5	Others	http://www.selleckchem.com/products/10-dab-10-deacetylbaccatin.html	10-Deacetylbaccatin-III is an antineoplastic agent and an anti-cancer intermediate.	Others	C29H36O10	Free Base	N/A	[H][C@@]12C[C@H](O)[C@@]3(C)C(=O)[C@H](O)C4=C(C)[C@@H](O)C[C@@](O)([C@@H](OC(=O)C5=CC=CC=C5)[C@]3([H])[C@@]1(CO2)OC(C)=O)C4(C)C |r,c:25,27,t:23|	0.364	6	3	5
S2410	Paeoniflorin	480.46	23180-57-6	Others	http://www.selleckchem.com/products/paeoniflorin.html	Paeoniflorin is a herbal constituent extracted from the root of Paeonia albiflora Pall.	Others	C23H28O11	Free Base	N/A	[H][C@@]12C[C@@]3(O[C@@H]4O[C@H](CO)[C@@H](O)[C@H](O)[C@H]4O)[C@]1(COC(=O)C1=CC=CC=C1)[C@@]1([H])O[C@]2(O)C[C@]3(C)O1 |r,c:25,27,t:23|	-1.283	6	4	7
S2411	Geniposide	388.37	24512-63-8	Others	http://www.selleckchem.com/products/geniposide.html	Geniposide is an iridoid glycoside isolated from the fruit of Gardenia jasminoides Ellis.	Others	C17H24O10	Free Base	N/A	[H][C@]12CC=C(CO)[C@@]1([H])[C@H](O[C@@H]1O[C@H](CO)[C@@H](O)[C@H](O)[C@H]1O)OC=C2C(=O)OC |r,c:25,t:3|	-2.066	5	5	6
S2412	Genipin	226.23	6902-77-8	Others	http://www.selleckchem.com/products/genipin.html	Genipin is an active aglycone derived from an iridoid glycoside called geniposide, which is found in the fruit of Gardenia jasminoides Ellis.	Others	C11H14O5	Free Base	N/A	[H][C@]12CC=C(CO)[C@@]1([H])[C@H](O)OC=C2C(=O)OC |r,c:13,t:3|	-0.319	3	1	3
S2413	Geniposidic acid	374.34	27741-01-1	Immunology & Inflammation related	http://www.selleckchem.com/products/geniposidic-acid.html	Geniposidic acid is an iridoid glucoside, used to treat inflammation, jaundice and hepatic disorders.	Others	C16H22O10	Free Base	N/A	[H][C@]12CC=C(CO)[C@@]1([H])[C@H](O[C@@H]1O[C@H](CO)[C@@H](O)[C@H](O)[C@H]1O)OC=C2C(O)=O |r,c:25,t:3|	-2.291	4	5	5
S2415	Astragaloside A	784.97	83207-58-3	Calcium Channel	http://www.selleckchem.com/products/astragaloside-a.html	Astragaloside A (Astragaloside IV) is the primary pure saponin isolated from Astragalus membranaceus, which has been widely used for the treatment of cardiovascular diseases.	TGF-beta/Smad	C41H68O14	Free Base	Cyclosiversioside F	[H][C@@]1([C@@H](O)C[C@@]2(C)[C@]3([H])C[C@H](O[C@@H]4O[C@H](CO)[C@@H](O)[C@H](O)[C@H]4O)[C@]4([H])[C@]5(C[C@@]35CC[C@]12C)CC[C@H](O[C@@H]1OC[C@@H](O)[C@H](O)[C@H]1O)C4(C)C)[C@]1(C)CC[C@@H](O1)C(C)(C)O |r|	-0.348	5	8	7
S2417	20-Hydroxyecdysone	480.63	5289-74-7	Others	http://www.selleckchem.com/products/20-hydroxyecdysone.html	20-Hydroxyecdysone (Ecdysterone, 20E) is a naturally occurring ecdysteroid hormone which controls the ecdysis (moulting) and metamorphosis of arthropods.	Others	C27H44O7	Free Base	N/A	[H][C@]12CC[C@]3(C)[C@H](CC[C@@]3(O)C1=CC(=O)[C@]1([H])C[C@@H](O)[C@@H](O)C[C@]21C)[C@@](C)(O)[C@H](O)CCC(C)(C)O |r,c:13|	1.137	1	3	5
S2422	Ipriflavone (Osteofix)	280.32	35212-22-7	Others	http://www.selleckchem.com/products/ipriflavone.html	Ipriflavone (7-Isopropoxyisoflavon) is used to inhibit bone resorption.	Others	C18H16O3	Free Base	N/A	CC(C)OC1=CC=C2C(=O)C(=COC2=C1)C1=CC=CC=C1 |c:10,14,19,21,t:4,6,17|	3.576	3	0	3
S2423	(S)-10-Hydroxycamptothecin	364.35	19685-09-7	Topoisomerase	http://www.selleckchem.com/products/10-hydroxycamptothecin.html	10-Hydroxycamptothecin is a DNA topoisomerase I inhibitor with potent anti-tumor activity.	DNA Damage	C20H16N2O5	Free Base	N/A	CC[C@@]1(O)C(=O)OCC2=C1C=C1N(CC3=CC4=CC(O)=CC=C4N=C13)C2=O |r,c:8,11,20,22,t:15,17,25|	1.504	4	1	1
S2425	Apocynin	166.17	498-02-2	NADPH oxidase	http://www.selleckchem.com/products/apocynin-acetovanillone.html	Apocynin is a selective NADPH-oxidase inhibitor with IC50 of 10 μM.	Others	C9H10O3	Free Base	N/A	COC1=C(O)C=CC(=C1)C(C)=O |c:2,5,7|	1.311	2	1	2
S2437	Rotundine	355.43	483-14-7	Dopamine Receptor	http://www.selleckchem.com/products/rotundine.html	Rotundine (L-tetrahydropalmatine, L-THP) is a selective dopamine D1 receptor antagonist with IC50 of 166 nM.	Neuronal Signaling	C21H25NO4	Free Base	N/A	[H][C@@]12CC3=CC=C(OC)C(OC)=C3CN1CCC1=C2C=C(OC)C(OC)=C1 |r,c:11,19,28,t:3,5,22|	3.599	4	0	4
S2438	Synephrine HCl	203.67	5985-28-4	Adrenergic Receptor	http://www.selleckchem.com/products/synephrine-hcl.html	SynephrineHCl (Oxedrine, p-Synephrine) is a sympathomimetic α-adrenergic receptor (AR) agonist.	Neuronal Signaling	C9H14ClNO2	Hydrochloride	N/A	Cl.CNCC(O)C1=CC=C(O)C=C1 |c:10,t:5,7|	0.997	0	3	3
S2439	Guanosine	283.24	118-00-3	Others	http://www.selleckchem.com/products/guanosine.html	Guanosine is a purine nucleoside comprising guanine attached to a ribose (ribofuranose) ring via a &beta;-N9-glycosidic bond.	Others	C10H13N5O5	Free base	N/A	NC1=NC2=C(N=CN2[C@@H]2O[C@H](CO)[C@@H](O)[C@H]2O)C(=O)N1 |r,c:5,t:1,3|	-2.38	4	5	2
S2442	Inosine	268.23	58-63-9	Others	http://www.selleckchem.com/products/inosine.html	Inosine is a nucleoside that is formed when hypoxanthine is attached to a ribose ring via a &beta;-N9-glycosidic bond.	Others	C10H12N4O5	Free Base	N/A	OC[C@H]1O[C@H]([C@H](O)[C@@H]1O)N1C=NC2=C1N=CNC2=O |r,c:11,13,16|	-2.249	4	4	2
S2443	Tolbutamide	270.35	64-77-7	Potassium Channel	http://www.selleckchem.com/products/tolbutamide.html	Tolbutamide is an inhibitor of cAMP with IC50 of 4 mM.	Transmembrane Transporters	C12H18N2O3S	Free Base	N/A	CCCCNC(=O)NS(=O)(=O)C1=CC=C(C)C=C1 |c:16,t:11,13|	2.336	3	2	5
S2446	Levosimendan	280.28	141505-33-1	Calcium Channel	http://www.selleckchem.com/products/levosimendan.html	Levosimendan is a calcium sensitizer acting through calcium-dependent binding to cardiac troponin C (cTnC), provides treatment for heart failure. Phase 4.	Others	C14H12N6O	Free Base	N/A	C[C@@H]1CC(=O)NN=C1C1=CC=C(NN=C(C#N)C#N)C=C1 |r,c:6,20,t:9,11|	1.486	3	2	3
S2448	Gambogic Acid	628.75	2752-65-0	Bcl-2,Caspase	http://www.selleckchem.com/products/gambogic-acid.html	Gambogic Acid activates caspases with EC50 of 0.78-1.64 &mu;M and competitively inhibits Bcl-X<sub>L</sub>, Bcl-2, Bcl-W, Bcl-B, Bfl-1 and Mcl-1 with IC50 of 1.47, 1.21, 2.02, 0.66, 1.06 and 0.79 &mu;M, respectively.	Apoptosis	C38H44O8	Free Base	N/A	CC(C)=CCC[C@@]1(C)OC2=C(CC=C(C)C)C3=C(C(=O)C4=C[C@@H]5C[C@H]6C(C)(C)O[C@@](C\C=C(\C)C(O)=O)(C5=O)[C@@]46O3)C(O)=C2C=C1 |r,c:9,46,49,t:16,20|	6.957	6	1	8
S2449	Forskolin	410.5	66575-29-9	cAMP	http://www.selleckchem.com/products/forskolin.html	Forskolin is a ubiquitous activator of eukaryotic adenylyl cyclase (AC), commonly used to raise levels of cAMP in the study and research of cell physiology.	GPCR & G Protein	C22H34O7	Free Base	Coleonol	[H][C@@]12[C@H](O)[C@H](OC(C)=O)[C@@]3(C)O[C@](C)(CC(=O)[C@]3(O)[C@@]1(C)[C@@H](O)CCC2(C)C)C=C |r|	0.837	4	2	3
S2450	Equol	242.27	531-95-3	Estrogen/progestogen Receptor	http://www.selleckchem.com/products/equol.html	Equol ,a metabolite of soybeans, is an important isoflavone in humans，specifically binds to 5α-DHT, has a modest affinity for recombinant estrogen receptor ERβ. Phase 2.	Endocrinology & Hormones	C15H14O3	Free Base	N/A	OC1=CC=C(C=C1)[C@H]1COC2=CC(O)=CC=C2C1 |r,c:3,5,14,16,t:1,11|	3.211	1	2	1
S2451	Amantadine HCl	187.7	665-66-7	Dopamine Receptor	selleckchem.com/products/Amantadine-hydrochloride(Symmetrel).html	Amantadine HCl is used to treat or prevent infections of the respiratory tract caused by a certain virus.	Neuronal Signaling	C10H18ClN	Hydrochloride	Symmetrel	Cl.NC12CC3CC(CC(C3)C1)C2	1.877	0	1	0
S2452	Amfebutamone (Bupropion) HCl	276.2	31677-93-7	AChR,Dopamine Receptor	http://www.selleckchem.com/products/Amfebutamone-hydrochloride(Bupropion).html	Amfebutamone HCl is a selective norepinephrine-dopamine reuptake inhibitor with IC50 of 6.5 and 3.4μM for the reuptake of dopamine and norepinephrine, respectively	Neuronal Signaling	C13H19Cl2NO	Hydrochloride	Wellbutrin, Zyban, Budeprion	Cl.CC(NC(C)(C)C)C(=O)C1=CC=CC(Cl)=C1 |c:11,14,t:9|	3.501	1	1	4
S2453	Benserazide HCl	293.7	14919-77-8	Decarboxylase	selleckchem.com/products/Benserazide-hydrochloride(Serazide).html	Benserazide HCl is a peripherally-acting aromatic L-amino acid decarboxylase (AAAD) or DOPA decarboxylase inhibitor.	Others	C10H16ClN3O5	Hydrochloride	Serazide	Cl.NC(CO)C(=O)NNCC1=C(O)C(O)=C(O)C=C1 |c:9,16,t:13|	-1.245	1	7	5
S2454	Bupivacaine HCl	324.89	18010-40-7	Sodium Channel	selleckchem.com/products/Bupivacaine-hydrochloride(Marcain).html	Bupivacaine hydrochloride(Marcain) is a more potent cAMP production inhibitor with an IC50 of 2.3 μM	GPCR & G Protein	C18H29ClN2O	Hydrochloride	Marcain, Marcaine, Sensorcaine, Vivacaine	Cl.CCCCN1CCCCC1C(=O)NC1=C(C)C=CC=C1C |c:14,17,19|	4.692	1	1	5
S2455	Bethanechol chloride	196.68	590-63-6	AChR	selleckchem.com/products/Carbamyl-beta-methylcholine-chloride(Bethanechol-chloride).html	Bethanechol chloride is a selective muscarinic receptor agonist without any effect on nicotinic receptors.	Neuronal Signaling	C7H17ClN2O2	quaternary-N Chloride salt	N/A	[Cl-].CC(C[N+](C)(C)C)OC(N)=O	-3.702	2	1	4
S2456	Chlorpromazine HCl	355.33	69-09-0	Dopamine Receptor,Potassium Channel	http://www.selleckchem.com/products/Chlorpromazine-hydrochloride(Sonazine).html	Chlorpromazine HCl is a dopamine and potassium channel inhibitor with IC50 of 6.1 and 16 μM for nward-rectifying K+ currents and time-independent outward currents	Neuronal Signaling	C17H20Cl2N2S	Hydrochloride	Promacid	Cl.CN(C)CCCN1C2=C(SC3=C1C=C(Cl)C=C3)C=CC=C2 |c:7,10,16,19,21,t:13|	5.121	0	0	4
S2457	Clindamycin HCl	461.44	21462-39-5	Antifection	http://www.selleckchem.com/products/Clindamycin-hydrochloride(Dalacin).html	Clindamycin hydrochloride(Dalacin) is the hydrated hydrochloride salt of clindamycin which is a semisynthetic antibiotic.	Others	C18H34Cl2N2O5S	Hydrochloride	Dalacin, Duac, BenzaClin,Clindoxyl, Acanya	Cl.CCC[C@@H]1C[C@H](N(C)C1)C(=O)N[C@H](C(C)Cl)[C@H]1O[C@H](SC)[C@H](O)[C@@H](O)[C@H]1O |r|	1.659	2	4	7
S2458	Clonidine HCl	266.5	4205-91-8	Adrenergic Receptor,Autophagy	http://www.selleckchem.com/products/Clonidine-hydrochloride(Catapres).html	Clonidine hydrochloride(Catapres) is a direct-acting α2 adrenergic agonist with an ED50 of 0.02±0.01 mg/kg.	Neuronal Signaling	C9H10Cl3N3	Hydrochloride	Catapres	Cl.ClC1=CC=CC(Cl)=C1NC1=NCCN1 |c:3,6,t:1,10|	2.736	1	2	2
S2459	Clozapine	326.82	5786-21-0	5-HT Receptor	http://www.selleckchem.com/products/Clozapine(Clozaril).html	Clozapine (Clozaril) is a potent 5-HT1C receptor antagonist with an IC50 of 110 nM for 5-HT-stimulated phosphoinositide hydrolysis.	Neuronal Signaling	C18H19ClN4	Free Base	Leponex, Fazaclo	CN1CCN(CC1)C1=NC2=C(NC3=C1C=CC=C3)C=CC(Cl)=C2 |c:10,13,16,18,21,24,t:8|	3.422	1	1	1
S2460	Pramipexole	211.33	104632-26-0	Dopamine Receptor	http://www.selleckchem.com/products/Pramipexole-Mirapex.html	Pramipexole is a partial/full D2S, D2L, D3, D4 receptor agonist with a Ki of 3.9, 2.2, 0.5 and 5.1 nM for D2S, D2L, D3, D4 receptor, respectively.	Neuronal Signaling	C10H17N3S	Free Base	Mirapexin, Sifrol	CCCN[C@H]1CCC2=C(C1)SC(N)=N2 |r,c:7,13|	1.383	1	2	3
S2461	Domperidone	425.91	57808-66-9	Dopamine Receptor	http://www.selleckchem.com/products/Domperidone(Motilium).html	Domperidone(Motilium) is a dopamine blocker and an antidopaminergic reagent.	Neuronal Signaling	C22H24ClN5O2	Free Base	Motilium, Motillium, Motinorm, Costi	ClC1=CC2=C(C=C1)N(C1CCN(CCCN3C(=O)NC4=C3C=CC=C4)CC1)C(=O)N2 |c:3,5,20,23,25,t:1|	2.453	2	2	5
S2466	Estriol	288.39	50-27-1	Estrogen/progestogen Receptor	http://www.selleckchem.com/products/Estriol(Oestriol).html	Estriol is an antagonist of the G-protein coupled estrogen receptor in estrogen receptor-negative breast cancer cells.	Endocrinology & Hormones	C18H24O3	Free Base	Oestriol	[H][C@@]12C[C@@H](O)[C@H](O)[C@@]1(C)CC[C@]1([H])C3=CC=C(O)C=C3CC[C@@]21[H] |r,c:19,t:14,16|	2.871	0	3	0
S2467	Famciclovir	321.339	104227-87-4	Antifection	http://www.selleckchem.com/products/Famciclovir(Famvir).html	Famciclovir(Famvir) is a guanine analogue antiviral drug used for the treatment of various herpesvirus infections.	Others	C14H19N5O4	Free Base	Famvir	CC(=O)OCC(CCN1C=NC2=CN=C(N)N=C12)COC(C)=O |c:9,t:11,13,16|	-0.294	7	1	9
S2468	Fenbendazole	299.35	43210-67-9	Antifection	http://www.selleckchem.com/products/Fenbendazole(Panacur).html	Fenbendazole is a broad spectrum benzimidazole anthelmintic used against gastrointestinal parasites with an IC50 of about 0.01 μg/mL.	Others	C15H13N3O2S	Free Base	Panacur, Safe-Guard	COC(=O)NC1=NC2=C(N1)C=C(SC1=CC=CC=C1)C=C2 |c:7,16,18,21,t:5,11,14|	3.769	3	2	4
S2470	Fluocinolone Acetonide	452.5	67-73-2	Glucocorticoid Receptor	http://www.selleckchem.com/products/Fluocinolone-acetonide(Flucort-N).html	Fluocinolone Acetonide is a corticosteroid that binds to the cytosolic glucocorticoid receptor.	Others	C24H30F2O6	Free Base	Flucort-N	[H][C@@]12C[C@@]3([H])[C@]4([H])C[C@]([H])(F)C5=CC(=O)C=C[C@]5(C)[C@@]4(F)[C@@H](O)C[C@]3(C)[C@@]1(OC(C)(C)O2)C(=O)CO |r,c:15,t:11|	0.995	4	2	2
S2471	Gallamine Triethiodide	891.53	65-29-2	AChR	http://www.selleckchem.com/products/Gallamine-triethiodide(Flaxedil).html	Gallamine triethiodide(Flaxedil) is a cholinergic receptor blocker with an IC50 of 68.0 ± 8.4 μM.	Neuronal Signaling	C30H60I3N3O3	tri-quaternary-N iodide salt	Flaxedil	[I-].[I-].[I-].CC[N+](CC)(CC)CCOC1=CC=CC(OCC[N+](CC)(CC)CC)=C1OCC[N+](CC)(CC)CC |c:12,24,t:10|	-8.065	3	0	21
S2473	Hexestrol	270.37	84-16-2	Estrogen/progestogen Receptor	http://www.selleckchem.com/products/Hexestrol(Bibenzyl).html	Hexestrol binds to ERα and ERβ with EC50 of 0.07 nM and 0.175 nM, respectively.	Endocrinology & Hormones	C18H22O2	Free Base	Bibenzyl, Cycloestrol, Dihydro-stilbestro, Dihydrostilbestrol, Estra-Plex	CC[C@@H]([C@@H](CC)C1=CC=C(O)C=C1)C1=CC=C(O)C=C1 |r,c:11,19,t:6,8,14,16|	5.192	0	2	5
S2475	Imatinib (STI571)	493.6	152459-95-5	PDGFR	http://www.selleckchem.com/products/Imatinib(STI571).html	Imatinib is a multi-target inhibitor of v-Abl, c-Kit and PDGFR with IC50 of 0.6 μM, 0.1 μM and 0.1 μM, respectively.	Protein Tyrosine Kinase	C29H31N7O	Free Base	STI571, Glivec	CN1CCN(CC2=CC=C(C=C2)C(=O)NC2=CC=C(C)C(NC3=NC=CC(=N3)C3=CC=CN=C3)=C2)CC1 |c:8,10,25,27,32,34,36,t:6,16,18,23,30|	4.22	4	2	7
S2476	Itraconazole	705.65	84625-61-6	P450 (e.g. CYP17)	http://www.selleckchem.com/products/Itraconazole(Sporanox).html	Itraconazole is a triazole antifungal agent.	Others	C35H38Cl2N8O4	Free Base	Sporanox	CCC(C)N1N=CN(C1=O)C1=CC=C(C=C1)N1CCN(CC1)C1=CC=C(OC[C@H]2CO[C@@](CN3C=NC=N3)(O2)C2=CC=C(Cl)C=C2Cl)C=C1 |r,c:5,13,15,37,39,49,53,t:11,25,27,44,46|	6.434	7	0	11
S2479	Lincomycin HCl	443	859-18-7	Antifection	http://www.selleckchem.com/products/Lincomycin-hydrochloride(Lincocin).html	Lincomycin hydrochloride(Lincocin) is the monohydrated salt of lincomycin, a substance produced by the growth of a member of the lincolnensis group of Streptomyces lincolnensis.	Others	C18H35ClN2O6S	Hydrochloride	Lincocin	Cl.[H][C@@]1(O[C@H](SC)[C@H](O)[C@@H](O)[C@@H]1O)[C@H](NC(=O)[C@@H]1C[C@@H](CCC)CN1C)[C@@H](C)O |r|	0.454	2	5	7
S2480	Loperamide HCl	513.5	34552-83-5	Autophagy,Opioid Receptor	http://www.selleckchem.com/products/Loperamide-hydrochloride.html	Loperamide HCl is an opioid-receptor agonist with an ED50 of 0.15 mg/kg.	Neuronal Signaling	C29H34Cl2N2O2	Hydrochloride	N/A	Cl.CN(C)C(=O)C(CCN1CCC(O)(CC1)C1=CC=C(Cl)C=C1)(C1=CC=CC=C1)C1=CC=CC=C1 |c:21,26,28,33,35,t:16,18,24,31|	5.017	1	0	7
S2481	Manidipine	610.7	89226-50-6	Calcium Channel	http://www.selleckchem.com/products/Manidipine(Manyper).html	Manidipine (Manyper) is a lipophilic, third-generation, highly vasoselective dihydropyridine calcium antagonist with an IC50 of 2.6 nM.	Transmembrane Transporters	C35H38N4O6	Free Base	Artedil, Iperten	COC(=O)C1=C(C)NC(C)=C(C1C1=CC=CC(=C1)[N+]([O-])=O)C(=O)OCCN1CCN(CC1)C(C1=CC=CC=C1)C1=CC=CC=C1 |c:4,9,15,17,38,40,45,47,t:13,36,43|	5.058	4	1	12
S2482	Manidipine 2HCl	683.62	89226-75-5	Calcium Channel	http://www.selleckchem.com/products/Manidipine-dihydrochloride(CV-4093).html	Manidipine 2HCl is a HCl salt form of Manidipine, which is a calcium channel blocker with IC50 of 2.6 nM, used clinically as an antihypertensive. Phase 4.	Transmembrane Transporters	C35H40Cl2N4O6	Dihydrochloride	N/A	Cl.Cl.COC(=O)C1=C(C)NC(C)=C(C1C1=CC=CC(=C1)[N+]([O-])=O)C(=O)OCCN1CCN(CC1)C(C1=CC=CC=C1)C1=CC=CC=C1 |c:4,9,15,17,38,40,45,47,t:13,36,43|	5.822	4	1	12
S2484	Milrinone	211.22	78415-72-2	PDE	http://www.selleckchem.com/products/Milrinone(Primacor).html	Milrinone is a potent and selective phosphodiesterase 3 inhibitor with an IC50 of 0.42 μM for the inhibition of FIII PDE.	Metabolism	C12H9N3O	Free Base	Primacor	CC1=C(C=C(C#N)C(=O)N1)C1=CC=NC=C1 |c:13,15,t:1,3,11|	0.356	2	1	1
S2485	Mitoxantrone 2HCl	517.4	70476-82-3	Topoisomerase	http://www.selleckchem.com/products/Mitoxantrone.html	Mitoxantrone HCl is a classic folic acid antagonist.	Others	C22H30Cl2N4O6	Dihydrochloride	Novantrone	Cl.Cl.OCCNCCNC1=CC=C(NCCNCCO)C2=C1C(=O)C1=C(O)C=CC(O)=C1C2=O |c:18,23,26,29,t:7,9|	0.832	2	8	12
S2486	Moroxydine HCl	207.66	3160-91-6	Antifection	http://www.selleckchem.com/products/Moroxydine-hydrochloride.html	Moroxydine HCl is a synthetic antiviral compound chemically belonging to the series of the heterocyclic biguanidines.	Others	C6H14ClN5O	Hydrochloride	N/A	Cl.NC(=N)NC(=N)N1CCOCC1	-0.672	1	2	3
S2487	Mycophenolic acid	320.34	24280-93-1	Dehydrogenase	http://www.selleckchem.com/products/Mycophenolic-acid(Mycophenolate).html	Mycophenolic acid is an immunosuppressant agent used to prevent rejection in organ transplantation.	Others	C17H20O6	Free Base	Mycophenolate	COC1=C(C)C2=C(C(=O)OC2)C(O)=C1C\C=C(/C)CCC(O)=O |c:2,13,t:5|	3.157	4	1	6
S2489	Nateglinide	317.42	105816-04-4	Potassium Channel	http://www.selleckchem.com/products/Nateglinide(Starlix).html	Nateglinide is an insulin secretagog agent that lowers blood glucose levels by stimulating insulin secretion from the pancreas.	Transmembrane Transporters	C19H27NO3	Free Base	Starlix	CC(C)[C@H]1CC[C@@H](CC1)C(=O)N[C@H](CC1=CC=CC=C1)C(O)=O |r,c:17,19,t:15|	3.981	2	1	6
S2491	Nitrendipine	360.37	39562-70-4	Autophagy,Calcium Channel	http://www.selleckchem.com/products/Nitrendipine.html	Nitrendipine is a dihydropyridine calcium channel blocker with an IC50 of 95 nM.	Transmembrane Transporters	C18H20N2O6	Free Base	N/A	CCOC(=O)C1=C(C)NC(C)=C(C1C1=CC(=CC=C1)[N+]([O-])=O)C(=O)OC |c:5,10,16,18,t:14|	2.115	4	1	7
S2492	Novobiocin Sodium	634.61	1476-53-5	Topoisomerase	www.selleckchem.com/products/Novobiocin-sodium(Albamycin).html	Novobiocin(Albamycin) is a very potent bacterial DNA gyrase and human organic anion transporters with Ki of of 14.87 ± 0.40μM for hOAT1, 4.77 ± 1.12μM for hOAT3 and 90.50 ± 7.50μM for hOAT4.	Others	C31H35N2NaO11	Sodium Salt	Albamycin, Cathomycin	[Na+].CO[C@@H]1[C@@H](OC(N)=O)[C@@H](O)[C@H](OC2=CC=C3C(O)=C(NC(=O)C4=CC=C([O-])C(CC=C(C)C)=C4)C(=O)OC3=C2C)OC1(C)C |r,c:32,39,t:12,14,17,22,24|	2.747	8	4	9
S2493	Olanzapine	312.44	132539-06-1	5-HT Receptor,Dopamine Receptor	http://www.selleckchem.com/products/Olanzapine(Zyprexa).html	Olanzapine is a high affinity for 5-HT2 serotonin and D2 dopamine receptor antagonist.	Neuronal Signaling	C17H20N4S	Free Base	Zyprexa, Zalasta, Zolafren, Olzapin, Oferta, Zypadhera	CN1CCN(CC1)C1=NC2=C(NC3=C1C=C(C)S3)C=CC=C2 |c:10,13,21,23,t:8,16|	2.69	1	1	1
S2494	Olopatadine HCl	373.87	140462-76-6	Histamine Receptor	http://www.selleckchem.com/products/Olopatadine-hydrochloride(Opatanol).html	Olopatadine hydrochloride(Opatanol) is a histamine blocker and mast cell stabilizer with an IC50 of 559 μM for the release of histamine	Neuronal Signaling	C21H24ClNO3	Hydrochloride	Opatanol, Pataday, Patanase, Allelock	Cl.CN(C)CC\C=C1\C2=C(COC3=C1C=C(CC(O)=O)C=C3)C=CC=C2 |c:7,11,20,23,25,t:14|	0.92	2	0	5
S2495	Oxymetazoline HCl	296.84	2315-02-8	Adrenergic Receptor	http://www.selleckchem.com/products/Oxymetazoline-hydrochloride.html	Oxymetazoline hydrochloride is an α1 and α2 adrenergic receptor agonist.	Neuronal Signaling	C16H25ClN2O	Hydrochloride	N/A	Cl.CC1=CC(=C(O)C(C)=C1CC1=NCCN1)C(C)(C)C |c:7,t:1,3,11|	3.664	1	2	3
S2496	Ozagrel	228.25	82571-53-7	P450 (e.g. CYP17)	http://www.selleckchem.com/products/Ozagrel.html	Ozagrel is a potent and selective thromboxane A2 synthetase inhibitor with an IC50 of 4 nM.	Metabolism	C13H12N2O2	Free Base	OKY 046	OC(=O)\C=C\C1=CC=C(CN2C=CN=C2)C=C1 |c:11,13,16,t:5,7|	1.604	2	0	4
S2497	Pancuronium dibromide	732.67	15500-66-0	AChR	http://www.selleckchem.com/products/Pancuronium-bromide(Pavulon).html	Pancuronium dibromide is a competitive acetylcholine antagonist with an IC50 of 5.5 ± 0.5 nM.	Neuronal Signaling	C35H60Br2N2O4	di-quaternary-N bromide salt	N/A	[Br-].[Br-].[H][C@@]12C[C@@H]([C@H](OC(C)=O)[C@@]1(C)CC[C@@]1([H])[C@@]2([H])CC[C@@]2([H])C[C@H](OC(C)=O)[C@H](C[C@]12C)[N+]1(C)CCCCC1)[N+]1(C)CCCCC1 |r|	-2.043	4	0	6
S2499	Phenoxybenzamine HCl	340.3	63-92-3	Adrenergic Receptor	http://www.selleckchem.com/products/Phenoxybenzamine-hydrochloride.html	Phenoxybenzamine HCl is a non-specific, irreversible alpha antagonist with an IC50 of 550 nM.	GPCR & G Protein	C18H23Cl2NO	HCl	N/A	Cl.CC(COC1=CC=CC=C1)N(CCCl)CC1=CC=CC=C1 |c:6,8,18,20,t:4,16|	4.96	1	0	8
S2500	Propafenone HCl	377.9	34183-22-7	Sodium Channel	http://www.selleckchem.com/products/Propafenone(Rytmonorm).html	Propafenone HCl is a classic anti-arrhythmic medication, which treats illnesses associated with rapid heartbeats such as atrial and ventricular arrhythmias.	Transmembrane Transporters	C21H27NO3	Hydrochloride	Rythmol SR, Rytmonorm	CCCNCC(O)COC1=CC=CC=C1C(=O)CCC1=CC=CC=C1 |c:11,13,22,24,t:9,20|	3.673	2	2	11
S2502	Quinine HCl Dihydrate	396.91	6119-47-7	Potassium Channel	http://www.selleckchem.com/products/Quinine-hydrochloride-dihydrate.html	Quinine hydrochloride dihydrate is a natural white crystalline alkaloid having antipyretic (fever-reducing), antimalarial, analgesic (painkilling), anti-inflammatory properties and a bitter taste.	Others	C20H29ClN2O4	Hydrochloride dihydrate	N/A	O.O.Cl.[H][C@@]12CCN(C[C@@H]1C=C)[C@@]([H])(C2)[C@H](O)C1=CC=NC2=C1C=C(OC)C=C2 |r,c:18,20,27,t:16,23|	2.701	2	1	4
S2503	Racecadotril	385.48	81110-73-8	Opioid Receptor	http://www.selleckchem.com/products/Racecadotril(Acetorphan).html	Racecadotril is a peripherally acting enkephalinase inhibitor with an IC50 of 4.5 μM	Neuronal Signaling	C21H23NO4S	Free Base	Acetorphan	CC(=O)SCC(CC1=CC=CC=C1)C(=O)NCC(=O)OCC1=CC=CC=C1 |c:9,11,24,26,t:7,22|	3.128	4	1	11
S2504	Ribavirin	244.209	36791-04-5	Antifection	http://www.selleckchem.com/products/Ribavirin(Copegus).html	Ribavirin (Copegus) is an anti-viral agent indicated for severe RSV infection (individually), hepatitis C infection and other viral infections.	Others	C8H12N4O5	Free Base	Rebetol, Ribasphere, Vilona, Virazole	NC(=O)C1=NN(C=N1)[C@@H]1O[C@H](CO)[C@@H](O)[C@H]1O |r,c:6,t:3|	-2.745	4	4	3
S2505	Rosiglitazone maleate	473.5	155141-29-0	PPAR	http://www.selleckchem.com/products/Rosiglitazone-maleate.html	Rosiglitazone, a member of the thiazolidinedione class of antihyperglycaemic agents, is a high-affinity selective agonist of the <b>peroxisome proliferator-activated receptor-γ</b>.	Metabolism	C22H23N3O7S	Maleate	N/A	OC(=O)\C=C/C(O)=O.CN(CCOC1=CC=C(CC2SC(=O)NC2=O)C=C1)C1=NC=CC=C1 |c:25,30,32,t:12,14,28|	3.307	6	1	9
S2506	Roxithromycin	837.067	80214-83-1	Antifection	http://www.selleckchem.com/products/Roxithromycin(Roxl-150).html	Roxithromycin is a semi-synthetic macrolide antibiotic. It is used to treat respiratory tract, urinary and soft tissue infections.	Others	C41H76N2O15	Free Base	Roxl-150, Roxo, Surlid, Rulide, Biaxsig, Roxar, Roximycin, Roxomycin, Tirabicin, Coroxin	CC[C@H]1OC(=O)[C@H](C)[C@@H](O[C@H]2C[C@@](C)(OC)[C@@H](O)[C@H](C)O2)[C@H](C)[C@@H](O[C@@H]2O[C@H](C)C[C@@H]([C@H]2O)N(C)C)[C@](C)(O)C[C@@H](C)\C(=N\OCOCCOC)[C@H](C)[C@@H](O)[C@]1(C)O |r|	1.619	11	3	13
S2508	Scopolamine HBr	384.26	114-49-8	AChR	http://www.selleckchem.com/products/Scopolamine-hydrobromide.html	Scopolamine hydrobromide is a competitive muscarinic acetylcholine receptor with an IC50 of 55.3 ± 4.3 nM.	Neuronal Signaling	C17H22BrNO4	Hydrobromide	N/A	Br.[H][C@]12O[C@@]1([H])[C@]1([H])C[C@@H](C[C@@]2([H])N1C)OC(=O)[C@H](CO)C1=CC=CC=C1 |r,c:25,27,t:23|	1.314	3	1	5
S2509	Sotalol HCl	308.82	959-24-0	Adrenergic Receptor	http://www.selleckchem.com/products/Sotalol-hydrochloride(Betapace).html	Sotalol (Betapace) is a non-selective beta blocker and a potassium channel blocker with an IC50 of 43 μM	Neuronal Signaling	C12H21ClN2O3S	Hydrochloride	Sotalex	Cl.CC(C)NCC(O)C1=CC=C(NS(C)(=O)=O)C=C1 |c:16,t:7,9|	0.876	2	3	6
S2510	Spectinomycin 2HCl	405.27	21736-83-4	Antifection	www.selleckchem.com/products/Spectinomycin--hydrochloride.html	Spectinomycin HCl is a new parenteral antibiotic prepared from Streptomyces spectabilis.	Others	C14H26Cl2N2O7	dihydrochloride	N/A	Cl.Cl.[H][C@]12O[C@]3([H])O[C@H](C)CC(=O)[C@]3(O)O[C@]1([H])[C@@H](NC)[C@@H](O)[C@@H](NC)[C@@H]2O |r|	-1.566	4	4	2
S2511	Sulfadoxine	310.33378	2447-57-6	Antifection	http://selleckchem.com/products/Sulfadoxine(Sulphadoxine).html	Sulfadoxine is an ultra-long-lasting sulfonamide with an IC50 of 249 μg/ml for P. vivax.	Others	C12H14N4O4S	Free Base	Sulphadoxine	COC1=C(OC)C(NS(=O)(=O)C2=CC=C(N)C=C2)=NC=N1 |c:2,16,18,20,t:11,13|	0.837	6	2	5
S2512	Tenoxicam	337.378	59804-37-4	COX	http://www.selleckchem.com/products/Tenoxicam(Mobiflex).html	Tenoxicam is a good HO. radicals scavenger with an IC50 of 56.7 μM	Others	C13H11N3O4S2	Free Base	Mobiflex	CN1C(C(=O)NC2=CC=CC=N2)=C(O)C2=C(C=CS2)S1(=O)=O |c:8,10,17,t:6,12,15|	0.454	4	2	2
S2515	Vardenafil HCl Trihydrate	579.11	330808-88-3	PDE	http://www.selleckchem.com/products/Vardenafil(Vivanza).html	Vardenafil HCl Trihydrate is a new type PDE inhibitor with IC50 of 0.7 and 180 nM for PDE5 and PDE1, respectively.	Metabolism	C23H39ClN6O7S	Hydrochloride trihydrate	Levitra	O.O.O.Cl.CCCC1=NC(C)=C2N1N=C(NC2=O)C1=CC(=CC=C1OCC)S(=O)(=O)N1CCN(CC)CC1 |c:6,10,18,20,t:3,16|	2.109	6	1	8
S2516	Xylazine HCl	256.79	23076-35-9	Adrenergic Receptor	http://www.selleckchem.com/products/Xylazine(Rompun).html	Xylazine HCl is α2 class of adrenergic receptor agonist.	Neuronal Signaling	C12H17ClN2S	Hydrochloride	N/A	Cl.CC1=CC=CC(C)=C1NC1=NCCCS1 |c:3,6,t:1,10|	3.647	1	1	2
S2517	Maprotiline HCl	313.86	10347-81-6	Adrenergic Receptor	http://www.selleckchem.com/products/Maprotiline-hydrochloride.html	Maprotiline hydrochloride (Deprilept, Ludiomil, Psymion) is a selective noradrenalin re-uptake inhibitor and a tetracyclic antidepressant.	Neuronal Signaling	C20H24ClN	Hydrochloride	Deprilept, Ludiomil, Psymion	Cl.CNCCCC12CCC(C3=CC=CC=C13)C1=C2C=CC=C1 |c:11,17,20,22,t:9,13|	4.498	0	1	4
S2519	Naphazoline HCl	246.74	550-99-2	Adrenergic Receptor	http://www.selleckchem.com/products/Naphazoline-hydrochloride-Naphcon.html	Naphazoline hydrochloride (Naphcon) is an ocular vasoconstrictor and imidazoline derivative sympathomimetic amine.	Neuronal Signaling	C14H15ClN2	Hydrochloride	Naphcon, Albalon	Cl.C(C1=NCCN1)C1=C2C=CC=CC2=CC=C1 |c:7,9,11,14,16,t:1|	2.442	1	1	2
S2521	Epinephrine bitartrate	333.29	51-42-3	Adrenergic Receptor	http://www.selleckchem.com/products/Epinephrine-bitartrate-Adrenalinium.html	Epinephrine Bitartrate is alpha- and beta-adrenergic receptor stimulator.	GPCR & G Protein	C13H19NO9	tartrate	D02149, Adrenalinetartrate, Adrenaline tatrate, Epinephrine Acid Tartrate	O[C@H]([C@@H](O)C(O)=O)C(O)=O.CNC[C@H](O)C1=CC(O)=C(O)C=C1 |r,c:20,t:14,17|	-3.996	2	6	6
S2522	L-Adrenaline	183.2	51-43-4	Adrenergic Receptor	http://www.selleckchem.com/products/L-Adrenaline-Epinephrine.html	L-Adrenaline belongs to a group of the compounds known as catecholamines.	Neuronal Signaling	C9H13NO3	Free Base	Adrenaline, d-Adrenaline, Adnephrine, Adrenalin, Chelafrin, Epinefrina, Epinephran, Epirenan, Exadri	CNC[C@H](O)C1=CC(O)=C(O)C=C1 |r,c:11,t:5,8|	0.372	0	4	3
S2524	Phenytoin Sodium	274.25	630-93-3	Sodium Channel	http://www.selleckchem.com/products/Phenytoin-sodium-Dilantin.html	Phenytoin sodium is an inactive voltage-gated sodium channel stabilizer.	Transmembrane Transporters	C15H11N2NaO2	Sodium Salt	Aleviatin, Diphenylhydantoin sodium, Eptoin, Phenytoin soluble, Prompt; Phenytek	[Na+].[O-]C1=NC(=O)C(N1)(C1=CC=CC=C1)C1=CC=CC=C1 |c:10,12,17,19,t:1,8,15|	2.084	2	1	2
S2525	Phenytoin	252.27	57-41-0	Sodium Channel	http://www.selleckchem.com/products/Phenytoin-Lepitoin.html	Phenytoin is an inactive voltage-gated sodium channel stabilizer.	Transmembrane Transporters	C15H12N2O2	Free Base	Di-Hydan, Dihycon, Dilabid, Diphedan, Diphenat, Diphenylan, Diphenylhydantoin, Hydantol, Lehydan, NS	O=C1NC(=O)C(N1)(C1=CC=CC=C1)C1=CC=CC=C1 |c:10,12,17,19,t:8,15|	2.105	2	2	2
S2526	Alizarin	240.21	72-48-0	P450 (e.g. CYP17)	http://www.selleckchem.com/products/Alizarin.html	Alizarin strongly inhibits P450 isoform CYP1A1, CYP1A2 and CYP1B1 with IC50 of 6.2 μM, 10.0 μM and 2.7 μM, respectively; weakly inhibits CYP2A6 and CYP2E1, and does not inhibit CYP2C19, CYP3A4 and CYP3A5.	Metabolism	C14H8O4	Free Base	Rubia, alizarin crimson, crimson madder, rose madder	OC1=C(O)C2=C(C=C1)C(=O)C1=CC=CC=C1C2=O |c:1,4,6,13,15,t:11|	2.324	2	2	0
S2528	Ciclopirox	207.27	29342-05-0	ATPase	http://www.selleckchem.com/products/Ciclopirox-Penlac.html	Ciclopirox (Penlac) is a synthetic antifungal agent.	Others	C12H17NO2	Free Base	Batrafen, Loprox, Mycoster, Stieprox, HOE 296b	CC1=CC(=O)N(O)C(=C1)C1CCCCC1 |c:7,t:1|	2.489	1	0	1
S2529	Dopamine HCl	189.64	62-31-7	Dopamine Receptor	http://www.selleckchem.com/products/Dopamine-hydrochloride-Inotropin.html	Dopamine hydrochloride (Inotropin) is a catecholamine neurotransmitter present in a wide variety of animals,And a dopamine D1-5 receptors agonist.	Neuronal Signaling	C8H12ClNO2	Hydrochloride	ASL 279, Cardiosteril, Dopamine Fresenius, Dopastat, Intropin, Rascordin, Revivan, Tensamin	Cl.NCCC1=CC(O)=C(O)C=C1 |c:9,t:3,6|	1.155	0	3	2
S2531	Asaraldehyde	196.2	4460-86-0	COX	http://www.selleckchem.com/products/Asaraldehyde-Asaronaldehyde.html	Asaraldehyde is a natural COX-2 inhibitor, exhibiting 17-fold selectivity over COX-1.	Neuronal Signaling	C10H12O4	Free Base	Asaronaldehyde, Asarylaldehyde, NSC 89299	COC1=CC(OC)=C(OC)C=C1C=O |c:10,t:2,6|	1.54	4	0	4
S2532	L-Ascorbyl 6-palmitate	414.53	137-66-6	Others	http://www.selleckchem.com/products/L-Ascorbyl-6-palmitate.html	Ascorbyl palmitate is an ester formed from ascorbic acid and palmitic acid creating a fat-soluble form of vitamin C.	Others	C22H38O7	Free Base	Ascorbic palmitate, Ascorbyl monopalmitate, Ascorbyl palmitate, E 304, Grindox 562, L-Ascorbyl 6-pal	[H][C@@]1(OC(=O)C(O)=C1O)[C@@H](O)COC(=O)CCCCCCCCCCCCCCC |r,c:6|	5.268	4	3	18
S2533	Ritodrine HCl	323.81	23239-51-2	Adrenergic Receptor	www.selleckchem.com/products/Ritodrine-hydrochloride-Yutopar.html	Ritodrine hydrochloride (DU 21220; Miolene; NSC 291565; Pre-Par) is a hydrochloride salt of ritodrine which is a β-2 adrenergic receptor agonist.	Neuronal Signaling	C17H22ClNO3	Hydrochloride	DU 21220; Miolene; NSC 291565	Cl.[H][C@](C)(NCCC1=CC=C(O)C=C1)[C@@]([H])(O)C1=CC=C(O)C=C1 |r,c:11,22,t:6,8,17,19|	3.037	0	4	6
S2534	Isoconazole nitrate	479.14	24168-96-5	Antifection	http://www.selleckchem.com/products/Isoconazole-nitrate-Travogen.html	Isoconazole nitrate (Travogen) is an azole antifungal reagent.	Others	C18H15Cl4N3O4	Nitrate	Adestan G 100, Fazol, Gyno-Travogen, R 15454, Travogyn	O[N+]([O-])=O.ClC1=CC=C(C(CN2C=CN=C2)OCC2=C(Cl)C=CC=C2Cl)C(Cl)=C1 |c:11,13,18,21,23,28,t:4,6|	4.387	2	0	6
S2535	Econazole nitrate	444.7	24169-02-6	Calcium Channel	http://www.selleckchem.com/products/Econazole-nitrate-Spectazole.html	Econazole nitrate (Spectazole) is an imidazole class antifungal medication.	Others	C18H16Cl3N3O4	Nitrate	Ecostatin, Epi-Pevaryl, Gyno-Pevaryl, Gynoryl, Ifenec, Micogin, NSC 243115, Palavale, Pevaryl	O[N+]([O-])=O.ClC1=CC=C(COC(CN2C=CN=C2)C2=CC=C(Cl)C=C2Cl)C=C1 |c:13,15,23,27,t:4,6,18,20|	3.722	2	0	6
S2536	Miconazole	416.13	22916-47-8	Others	http://www.selleckchem.com/products/Miconazole-Monistat.html	Miconazole (Monistat) is an imidazole antifungal agent.	Others	C18H14Cl4N2O	Free Base	Daktarin IV, MJR 1762, Monistat IV, NSC 170986, R 18134, Zimybase	ClC1=CC=C(COC(CN2C=CN=C2)C2=C(Cl)C=C(Cl)C=C2)C(Cl)=C1 |c:10,12,15,21,25,t:1,3,18|	5.645	2	0	6
S2537	Secnidazole	185.18	3366-95-8	Antifection	http://www.selleckchem.com/products/Secnidazole-Flagentyl.html	Secnidazole (Flagentyl) is a nitroimidazole anti-infective.	Others	C7H11N3O3	Free Base	PM 185184, RP 14539, Sindose, Secnil	CC(O)CN1C(C)=NC=C1[N+]([O-])=O |c:6,8|	0.04	1	1	3
S2538	Acetanilide	135.16	103-84-4	Others	http://www.selleckchem.com/products/Acetanilide-Antifebrin.html	Acetanilide is an aniline derivative and has possess analgesic.	Others	C8H9NO	Free Base	N-phenylacetamide, Acetanil, Acetamidobenzene, Acetylaniline, NSC 7636	CC(=O)NC1=CC=CC=C1 |c:6,8,t:4|	0.95	1	1	1
S2541	Clomipramine HCl	351.31	17321-77-6	5-HT Receptor	http://www.selleckchem.com/products/Clomipramine-hydrochloride-Anafranil.html	Clomipramine HCl is a hydrochloride salt of clomipramine which is a serotonin transporter (SERT), norepinephrine transporter (NET) dopamine transporter (DAT) blocker with Ki of 0.14, 54 and 3 nM, respectively.	Neuronal Signaling	C19H24Cl2N2	Hydrochloride	Anafranil	Cl.CN(C)CCCN1C2=C(CCC3=C1C=C(Cl)C=C3)C=CC=C2 |c:7,11,17,20,22,t:14|	5.434	0	0	4
S2542	Phenformin HCl	241.72	834-28-6	AMPK	http://www.selleckchem.com/products/Phenformin-hydrochloride.html	Phenformin hydrochloride is a hydrochloride salt of phenformin that is an anti-diabetic drug from the biguanide class.	PI3K/Akt/mTOR	C10H16ClN5	Hydrochloride	N/A	Cl.NC(=N)NC(=N)NCCC1=CC=CC=C1 |c:11,13,t:9|	1.339	0	3	6
S2543	Ceftiofur HCl	560.02	103980-44-5	Antifection	http://www.selleckchem.com/products/Ceftiofur-hydrochloride.html	Ceftiofur HCl is a cephalosporin <b>antibiotic</b>, used to treat both Gram-positive and Gram-negative bacteria infection.	Others	C19H18ClN5O7S3	Hydrochloride	N/A	Cl.[H][C@@]1(NC(=O)C(=N\OC)\C2=CSC(N)=N2)C(=O)N2C(C(O)=O)=C(CSC(=O)C3=CC=CO3)CS[C@]12[H] |r,c:13,30,t:9,22,28|	1.09	8	2	9
S2545	Scopine	155.19	498-45-3	Adrenergic Receptor	http://www.selleckchem.com/products/scopine.html	Scopine is the metabolite of anisodine, which is a α1-adrenergic receptor agonist and used in the treatment of acute circulatory shock.	Neuronal Signaling	C8H13NO2	Free Base	N/A	[H][C@]12O[C@@]1([H])[C@]1([H])C[C@H](O)C[C@@]2([H])N1C |r|	-0.627	1	1	0
S2547	Tiotropium Bromide hydrate	490.43	139404-48-1	AChR	http://www.selleckchem.com/products/Tiotropium-Bromide-hydrate.html	Tiotropium Bromide hydrate is a monohydrate of tiotropium bromide (Spiriva; Tiova; BA 679BR; tiopropium) that is an anticholinergic and bronchodilator and a muscarinic receptor antagonist.	Neuronal Signaling	C19H24BrNO5S2	quaternary-N bromide salt&hydr	N/A	O.[Br-].[H][C@]12C[C@@H](C[C@]([H])([C@H]3O[C@@H]13)[N+]2(C)C)OC(=O)C(O)(C1=CC=CS1)C1=CC=CS1 |r,c:23,29,t:21,27|	-1.727	3	0	5
S2549	Trospium chloride	427.96	10405-02-4	AChR	http://www.selleckchem.com/products/Trospium-chloride-Sanctura.html	Trospium chloride (Sanctura) is a competitive muscarinic cholinergic receptor antagonist.	Neuronal Signaling	C25H30ClNO3	quaternary-N chloride salt	Sanctura	[Cl-].[H][C@]12CC[C@]([H])(C[C@@H](C1)OC(=O)C(O)(C1=CC=CC=C1)C1=CC=CC=C1)[N+]21CCCC1 |r,c:17,19,24,26,t:15,22|	-0.324	2	0	5
S2550	Tolterodine tartrate	475.57	124937-52-6	AChR	http://www.selleckchem.com/products/Tolterodine-tartrate-Detrol-LA.html	Tolterodine tartrate (Detrol LA) is a tartrate salt of tolterodine that is a competitive muscarinic receptor antagonist.	Neuronal Signaling	C26H37NO7	Tartrate	Detrol LA, Kabi-2234, PNU-200583E	O[C@H]([C@@H](O)C(O)=O)C(O)=O.CC(C)N(CC[C@H](C1=CC=CC=C1)C1=CC(C)=CC=C1O)C(C)C |r,c:18,20,26,28,t:16,23|	0.963	2	3	10
S2551	Sulbactam sodium	255.22	69388-84-7	Antifection	http://www.selleckchem.com/products/sulbactam-sodium-unasyn.html	Sulbactam sodium (Unasyn) is an irreversible β-lactamase inhibitor.	Others	C8H10NNaO5S	Sodium salt	N/A	[Na+].[H][C@@]12CC(=O)N1[C@@]([H])(C([O-])=O)C(C)(C)S2(=O)=O |r|	-2.145	3	0	1
S2552	Azelastine HCl	418.36	79307-93-0	Histamine Receptor	http://www.selleckchem.com/products/Azelastine-hydrochloride-Astelin.html	Azelastine hydrochloride (Astelin) is a potent, second-generation, selective, histamine antagonist.	Neuronal Signaling	C22H25Cl2N3O	Hydrochloride	Allergodil, Rhinolast, Astelin, Optilas, Optivar	Cl.CN1CCCC(CC1)N1N=C(CC2=CC=C(Cl)C=C2)C2=CC=CC=C2C1=O |c:18,23,25,t:10,13,15,21|	4.476	2	0	3
S2553	5-Aminolevulinic acid HCl	167.59	5451-09-2	Others	http://www.selleckchem.com/products/5-Aminolevulinic-acid-hydrochloride.html	5-Aminolevulinic acid is an intermediate in heme biosynthesis in the body and the universal precursor of tetrapyrroles.	Others	C5H10ClNO3	Hydrochloride	Levulan, ALA	Cl.NCC(=O)CCC(O)=O	-3.318	2	1	4
S2554	Daphnetin	178.14	486-35-1	PKA,EGFR,PKC	http://selleckchem.com/products/Daphnetin.html	Daphnetin, a natural coumarin derivative, is a protein kinase inhibitor, inhibits EGFR, PKA and PKC with IC50 of 7.67 μM, 9.33 μM and 25.01 μM, respectively, also known to exhibit anti-inflammatory and anti-oxidant activities.	DNA Damage	C9H6O4	Free Base	N/A	OC1=CC=C2C=CC(=O)OC2=C1O |c:5,11,t:1,3|	1.415	2	2	0
S2555	Clarithromycin	747.95	81103-11-9	P450 (e.g. CYP17)	http://www.selleckchem.com/products/clarithromycin.html	Clarithromycin (Biaxin, Klacid) is a macrolide antibiotic and a CYP3A4 inhibitor.	Metabolism	C38H69NO13	Free Base	Crixan, Klaricid, Klabax, Claripen, Clarem, Claridar, Fromilid, Clacid, Clacee, Vikrol, Infex, Clari	CC[C@H]1OC(=O)[C@H](C)[C@@H](O[C@H]2C[C@@](C)(OC)[C@@H](O)[C@H](C)O2)[C@H](C)[C@@H](O[C@@H]2O[C@H](C)C[C@@H]([C@H]2O)N(C)C)[C@@](C)(C[C@@H](C)C(=O)[C@H](C)[C@@H](O)[C@]1(C)O)OC |r|	2.2	9	3	8
S2556	Rosiglitazone	357.43	122320-73-4	PPAR	http://www.selleckchem.com/products/Rosiglitazone-Avandia.html	Rosiglitazone (Avandia) is a potent antihyperglycemic agent and a potent thiazolidinedione insulin sensitizer with IC50 of 12, 4 and 9 nM for rat, 3T3-L1 and human adipocytes, respectively.	DNA Damage	C18H19N3O3S	Free Base	Avandia, BRL-49653	CN(CCOC1=CC=C(CC2SC(=O)NC2=O)C=C1)C1=CC=CC=N1 |c:18,23,25,t:5,7,21|	3.268	4	1	7
S2557	Terbinafine HCl	327.89	78628-80-5	Antifection	www.selleckchem.com/products/Terbinafine-hydrochloride(Zabel).html	Terbinafine hydrochloride (Lamisil) is a hydrochloride salt of terbinafine that is a synthetic allylamine antifungal and a squalene epoxidase inhibitor with an IC50 of 30 nM for Candida albicans.	Others	C21H26ClN	Hydrochloride	Zabel	Cl.CN(C\C=C\C#CC(C)(C)C)CC1=CC=CC2=C1C=CC=C2 |c:14,16,19,21,t:12|	5.717	0	0	6
S2559	Cortisone acetate	402.48	50-04-4	Glucocorticoid Receptor	http://www.selleckchem.com/products/Cortisone-acetate-Cortone.html	Cortisone acetate (Cortone) is an acetate salt form of cortisone that is a steroid hormone and a glucocorticoid.	Others	C23H30O6	Free Base	Artriona, Biocort Acetate, Cortadren, Incortin, NSC 49420, Scheroson	[H][C@@]12CC[C@](O)(C(=O)COC(C)=O)[C@@]1(C)CC(=O)[C@@]1([H])[C@@]2([H])CCC2=CC(=O)CC[C@]12C |r,t:26|	1.619	5	0	4
S2560	Amiloride HCl dihydrate	302.12	17440-83-4	Sodium Channel	http://www.selleckchem.com/products/amilorida.html	Amiloride hydrochloride dihydrate is a potent epithelial sodium channel blocker.	Transmembrane Transporters	C6H13Cl2N7O3	hydrochloride & dihydrate	MK-870	O.O.Cl.NC(=N)NC(=O)C1=NC(Cl)=C(N)N=C1N |c:12,t:6,9|	-0.78	3	4	2
S2561	Clomifene citrate	598.08	50-41-9	Estrogen/progestogen Receptor	http://www.selleckchem.com/products/Clomifene-citrate-Serophene.html	Clomifene citrate (Serophene) is a selective estrogen receptor modulator.	Endocrinology & Hormones	C32H36ClNO8	Citrate	Clomid, Serophene, Milophene	OC(=O)CC(O)(CC(O)=O)C(O)=O.CCN(CC)CCOC1=CC=C(C=C1)C(=C(/Cl)C1=CC=CC=C1)\C1=CC=CC=C1 |c:22,24,32,34,39,41,t:20,30,37|	2.129	4	0	14
S2564	Cloxacillin Sodium	475.88	7081-44-9	Antifection	http://www.selleckchem.com/products/Cloxacillin-sodium-Cloxacap.html	Cloxacillin Sodium is a sodium salt of cloxacillin that is a penicillinase-resistant, acid resistant, semi-synthetic penicillin.	Others	C19H19ClN3NaO6S	Sodium Salt & hydrate	Cloxapen, Cloxacap, Orbenin	O.[Na+].[H][C@]12SC(C)(C)[C@@H](N1C(=O)[C@H]2NC(=O)C1=C(C)ON=C1C1=CC=CC=C1Cl)C([O-])=O |r,c:16,20,25,27,t:23|	0.619	4	1	4
S2565	Amoxicillin Sodium	387.39	34642-77-8	Antifection	http://www.selleckchem.com/products/amoxicillin-(amox).html	Amoxicillin Sodium is a moderate- spectrum, bacteriolytic, β-lactam antibiotic.	Others	C16H18N3NaO5S	Sodium Salt	Amoxycillin	[Na+].[H][C@]12SC(C)(C)[C@@H](N1C(=O)[C@H]2NC(=O)[C@H](N)C1=CC=C(O)C=C1)C([O-])=O |r,c:23,t:18,20|	-1.534	2	3	4
S2566	Isoprenaline HCl	247.72	51-30-9	Adrenergic Receptor	http://www.selleckchem.com/products/Isoprenaline-hydrochloride.html	Isoprenaline is a non-selective β-adrenoceptor, inhibits the 3H-inositol phosphate accumulation with IC50 of 0.08 μM.	Neuronal Signaling	C11H18ClNO3	Hydrochloride	Isuprel, Isadrine, Euspiran, Proternol, NSC 37745, NSC 89747	Cl.CC(C)NCC(O)C1=CC=C(O)C(O)=C1 |c:13,t:7,9|	1.481	0	4	4
S2567	Medroxyprogesterone acetate	386.52	71-58-9	Estrogen/progestogen Receptor	http://www.selleckchem.com/products/Medroxyprogesterone-acetate.html	Medroxyprogesterone acetate is a progestin, a synthetic variant of the human hormone progesterone and a potent progesterone receptor agonist.	Endocrinology & Hormones	C24H34O4	Free Base	Medroxyprogesterone 17-acetate, MPA	[H][C@@]12CC[C@](OC(C)=O)(C(C)=O)[C@@]1(C)CC[C@@]1([H])[C@@]2([H])C[C@H](C)C2=CC(=O)CC[C@]12C |r,t:25|	3.755	4	0	3
S2569	Phenylephrine HCl	203.67	61-76-7	Adrenergic Receptor	http://www.selleckchem.com/products/Phenylephrine-hydrochloride.html	Phenylephrine hydrochloride is a selective α1-adrenergic receptor agonist.	GPCR & G Protein	C9H14ClNO2	Hydrochloride	N/A	Cl.[H][C@](O)(CNC)C1=CC(O)=CC=C1 |r,c:9,11,t:6|	0.997	0	3	3
S2570	Prednisolone Acetate	402.48	52-21-1	Glucocorticoid Receptor	http://www.selleckchem.com/products/Prednisolone-acetate-Omnipred.html	Prednisolone Acetate is a synthetic corticosteroid drug that is particularly effective as an immunosuppressant agent.	Endocrinology & Hormones	C23H30O6	Free Base	Omnipred	[H][C@@]12CC[C@](O)(C(=O)COC(C)=O)[C@@]1(C)C[C@H](O)[C@@]1([H])[C@@]2([H])CCC2=CC(=O)C=C[C@]12C |r,c:30,t:26|	1.639	4	1	4
S2573	Tetracaine HCl	300.82	136-47-0	Calcium Channel	http://www.selleckchem.com/products/tetracaine-hydrochloride-pontocaine.html	Tetracaine hydrochloride (Pontocaine) is a hydrochloride salt form of tetracaine which is a potent local anaesthetic and a channel function allosteric inhibitor.	Transmembrane Transporters	C15H25ClN2O2	Hydrochloride	N/A	Cl.CCCCNC1=CC=C(C=C1)C(=O)OCCN(C)C |c:7,9,t:5|	3.343	2	1	9
S2574	Tetracycline HCl	480.9	64-75-5	Antifection	http://www.selleckchem.com/products/tetracycline-hydrochloride.html	Tetracycline hydrochloride is a hydrochloride salt of tetracycline that is a broad-spectrum polyketide antibiotic.	Others	C22H25ClN2O8	Hydrochloride	N/A	Cl.[H][C@]12C[C@@]3([H])[C@]([H])(N(C)C)C(O)=C(C(N)=O)C(=O)[C@@]3(O)C(O)=C1C(=O)C1=C(O)C=CC=C1[C@@]2(C)O |r,c:22,27,30,32,t:11|	-0.513	3	4	2
S2576	Xylometazoline HCl	280.84	1218-35-5	Adrenergic Receptor	http://www.selleckchem.com/products/xylometazoline-hcl.html	Xylometazoline is an α-adrenoceptor agonist commonly used as nasal decongestant, exhibits highest potency at α2B-adrenoceptor subtype with EC50 of 99 μM. Phase 4.	Others	C16H25ClN2	HCl	N/A	Cl.CC1=CC(=CC(C)=C1CC1=NCCN1)C(C)(C)C |c:3,6,t:1,10|	3.906	1	1	3
S2577	Phenacetin	179.22	62-44-2	COX	http://www.selleckchem.com/products/phenacetin.html	Phenacetin is a non-opioid analgesic without anti-inflammatory properties.	Neuronal Signaling	C10H13NO2	Free Base	N/A	CCOC1=CC=C(NC(C)=O)C=C1 |c:11,t:3,5|	1.282	2	1	3
S2579	Zidovudine	267.24	30516-87-1	Reverse Transcriptase	http://www.selleckchem.com/products/zidovudine-retrovir.html	Zidovudine (Retrovir) is a reverse transcriptase inhibitor.	Microbiology	C10H13N5O4	Free Base	azidothymidine	CC1=CN([C@H]2C[C@H](N=[N+]=[N-])[C@@H](CO)O2)C(=O)NC1=O |r,t:1|	0.064	4	2	3
S2581	Quinapril HCl	474.98	82586-55-8	RAAS	http://www.selleckchem.com/products/quinapril-hydrochloride-accupril.html	Quinapril hydrochloride (Accupril) is the hydrochloride salt of quinapril that is an angiotensin-converting enzyme inhibitor with a Ki of 20 μM.	Endocrinology & Hormones	C25H31ClN2O5	Hydrochloride	N/A	Cl.CCOC(=O)[C@H](CCC1=CC=CC=C1)N[C@@H](C)C(=O)N1CC2=C(C[C@H]1C(O)=O)C=CC=C2 |r,c:10,12,22,30,32,t:8|	1.038	4	1	10
[truncated: 1,627 more rows]
