# Supplementary material for: Identification of nonsense-mediated decay inhibitors that alter the tumor immune landscape
Source: bioRxiv preprint, doi:10.1101/2023.12.28.573594, version 2 (2024-06-10)
Supplement: supplemental table [file 573594_file05.xlsx]

## Sheet: Sheet1
Name	Structure	Solubility	In Vitro Activity	In Vivo Activity
KVS0001		+	++	++
KVS0002		-	++	N/A
KVS0003		Failed synthesis	N/A	N/A
KVS0004		Failed synthesis	N/A	N/A
KVS0005		+	-	N/A
KVS0006		Failed synthesis	N/A	N/A
KVS0007		Failed synthesis	N/A	N/A
KVS0008		Failed synthesis	N/A	N/A
KVS0009		Failed synthesis	N/A	N/A
KVS0010		Failed synthesis	N/A	N/A
KVS0011		++	++	+
