# Supplementary material for: Identification of nonsense-mediated decay inhibitors that alter the tumor immune landscape
Source: bioRxiv preprint, doi:10.1101/2023.12.28.573594, version 2 (2024-06-10)
Supplement: supplemental table [file 573594_file07.xlsx]

## Sheet: LLC Mutation Data
CHROM	POS	REF	ALT	QUAL	DP	AF	SB	DP4	EFF[*].IMPACT	EFF[*].FUNCLASS	EFF[*].EFFECT	EFF[*].GENE	EFF[*].CODON			*Data obtained from NCBI (accession SRR8209110)
chr1	3681249	C	G	903	117	0.273504	3	35,47,18,17	MODIFIER	NONE	intergenic_region	Xkr4-Rp1	n.3681249C>G
chr1	4351880	TA	T	79	59	0.101695	0	42,11,5,1	MODIFIER	MODIFIER	NONE	NONE	intron_variant
chr1	4867294	ATG	A	106	11	0.272727	0	6,0,3,0	MODIFIER	MODIFIER	MODIFIER	NONE	NONE
chr1	5124505	GGT	G	147	73	0.068493	2	10,59,1,4	MODIFIER	MODIFIER	NONE	NONE	intron_variant
chr1	6274341	TA	T	336	39	0.282051	0	3,27,1,10	MODIFIER	NONE	3_prime_UTR_variant	Rb1cc1	c.*71delA
chr1	6440063	CT	C	136	66	0.181818	0	30,20,7,5	MODIFIER	NONE	intergenic_region	Fam150a-St18	n.6440064delT
chr1	6770919	CTT	C	159	83	0.180723	1	48,8,14,1	MODIFIER	MODIFIER	MODIFIER	MODIFIER	MODIFIER
chr1	6770919	CT	C	96	83	0.120482	4	48,8,10,0	MODIFIER	MODIFIER	MODIFIER	MODIFIER	MODIFIER
chr1	6803090	A	C	651	71	0.323944	3	16,32,10,13	MODERATE	MODERATE	MODERATE	MODIFIER	MODIFIER
chr1	6817618	G	T	367	73	0.191781	4	37,22,11,3	MODERATE	MODERATE	MODERATE	MODIFIER	MODIFIER
chr1	6910724	TA	T	184	50	0.26	7	24,10,6,7	MODIFIER	NONE	intergenic_region	St18-Pcmtd1	n.6910725delA
chr1	6923386	GA	G	153	56	0.214286	0	28,1,12,0	MODIFIER	NONE	intergenic_region	St18-Pcmtd1	n.6923387delA
chr1	6923386	GAAA	G	175	56	0.232143	0	28,1,13,0	MODIFIER	NONE	intergenic_region	St18-Pcmtd1	n.6923387_6923389delAAA
chr1	6923627	T	TA	70	74	0.094595	0	8,59,0,7	MODIFIER	NONE	intergenic_region	St18-Pcmtd1	n.6923627_6923628insA
chr1	6923627	TA	T	361	74	0.324324	5	7,41,1,23	MODIFIER	NONE	intergenic_region	St18-Pcmtd1	n.6923628delA
chr1	6923715	G	A	119	14	0.285714	0	0,10,0,4	MODIFIER	NONE	intergenic_region	St18-Pcmtd1	n.6923715G>A
chr1	7120423	G	A	573	83	0.253012	3	43,19,12,9	MODERATE	NONE	missense_variant	Pcmtd1	c.115G>A
chr1	7136261	G	C	1614	149	0.375839	0	51,41,33,24	MODIFIER	NONE	intron_variant	Pcmtd1	c.308-11376G>C
chr1	7649719	C	T	185	16	0.375	2	2,7,3,4	MODIFIER	NONE	intergenic_region	Pcmtd1-Sntg1	n.7649719C>T
chr1	7649730	C	T	160	14	0.357143	2	1,6,3,4	MODIFIER	NONE	intergenic_region	Pcmtd1-Sntg1	n.7649730C>T
chr1	7665082	T	G	96	11	0.272727	0	0,7,0,4	MODIFIER	NONE	intergenic_region	Pcmtd1-Sntg1	n.7665082T>G
chr1	7928477	T	G	183	13	0.461538	0	2,5,1,5	MODIFIER	NONE	intergenic_region	Pcmtd1-Sntg1	n.7928477T>G
chr1	8679196	TA	T	80	48	0.145833	0	3,37,0,7	MODIFIER	MODIFIER	MODIFIER	MODIFIER	NONE
chr1	8682358	GCA	G	620	69	0.26087	3	27,23,7,11	MODIFIER	MODIFIER	MODIFIER	MODIFIER	NONE
chr1	9545511	C	T	130	10	0.4	0	5,0,5,0	LOW	MODIFIER	MODIFIER	MODIFIER	NONE
chr1	9545516	C	T	181	11	0.545455	0	5,0,6,0	MODIFIER	MODIFIER	MODIFIER	NONE	NONE
chr1	9545539	G	A	243	15	0.533333	0	7,0,8,0	MODERATE	MODIFIER	MODIFIER	NONE	NONE
chr1	9545545	G	C	234	14	0.571429	0	6,0,8,0	MODERATE	MODIFIER	MODIFIER	NONE	NONE
chr1	9545548	C	G	246	18	0.5	0	8,1,8,1	MODERATE	MODIFIER	MODIFIER	NONE	NONE
chr1	9545577	G	A	301	31	0.354839	6	13,6,11,1	LOW	MODIFIER	MODIFIER	NONE	NONE
chr1	9545597	C	T	357	34	0.382353	1	14,7,10,3	MODERATE	MODIFIER	MODIFIER	NONE	NONE
chr1	9545621	A	T	393	44	0.340909	1	16,10,10,8	MODERATE	MODIFIER	MODIFIER	NONE	NONE
chr1	9545654	G	A	379	41	0.341463	9	14,12,4,11	MODERATE	MODIFIER	MODIFIER	NONE	NONE
chr1	9545663	C	T	180	33	0.212121	6	12,14,1,6	MODERATE	MODIFIER	MODIFIER	NONE	NONE
chr1	9545666	C	T	182	29	0.241379	6	10,12,1,6	MODERATE	MODIFIER	MODIFIER	NONE	NONE
chr1	9545668	G	A	179	30	0.233333	4	9,14,1,6	MODERATE	MODIFIER	MODIFIER	NONE	NONE
chr1	9545674	C	T	181	28	0.25	4	9,12,1,6	MODERATE	MODIFIER	MODIFIER	NONE	NONE
chr1	9545682	C	T	151	27	0.222222	8	8,13,0,6	LOW	MODIFIER	MODIFIER	NONE	NONE
chr1	9545684	G	T	155	27	0.222222	8	7,14,0,6	MODERATE	MODIFIER	MODIFIER	NONE	NONE
chr1	9545685	G	T	160	26	0.230769	8	7,13,0,6	LOW	MODIFIER	MODIFIER	NONE	NONE
chr1	9545688	G	T	163	24	0.25	5	5,13,0,6	LOW	MODIFIER	MODIFIER	NONE	NONE
chr1	9545691	G	A	156	26	0.230769	5	5,15,0,6	LOW	MODIFIER	MODIFIER	NONE	NONE
chr1	9545693	C	T	162	26	0.230769	5	5,15,0,6	MODERATE	MODIFIER	MODIFIER	NONE	NONE
chr1	9545700	C	G	227	28	0.285714	5	5,15,0,8	LOW	MODIFIER	MODIFIER	NONE	NONE
chr1	9545840	C	A	135	11	0.454545	6	4,2,1,4	MODERATE	MODIFIER	MODIFIER	NONE	NONE
chr1	9545848	C	A	101	11	0.363636	6	5,2,1,3	LOW	MODIFIER	MODIFIER	NONE	NONE
chr1	9545860	C	A	97	13	0.307692	0	6,3,2,2	MODERATE	MODIFIER	MODIFIER	NONE	NONE
chr1	9545894	G	T	212	21	0.333333	0	10,3,7,1	MODERATE	MODIFIER	MODIFIER	NONE	NONE
chr1	9545925	C	A	171	25	0.24	2	15,4,6,0	MODERATE	MODIFIER	MODIFIER	NONE	NONE
chr1	9545944	C	A	123	30	0.166667	5	17,7,6,0	LOW	MODIFIER	MODIFIER	NONE	NONE
chr1	9545951	G	T	110	22	0.181818	9	9,7,6,0	MODERATE	MODIFIER	MODIFIER	NONE	NONE
chr1	9546103	GCT	G	308	54	0.203704	0	21,22,6,5	HIGH	MODIFIER	MODIFIER	NONE	NONE
chr1	9546138	C	A	253	58	0.172414	1	28,20,5,5	LOW	MODIFIER	MODIFIER	NONE	NONE
chr1	9546150	T	C	189	57	0.140351	5	30,19,3,5	LOW	MODIFIER	MODIFIER	NONE	NONE
chr1	9546153	T	G	152	60	0.116667	1	32,20,4,4	LOW	MODIFIER	MODIFIER	NONE	NONE
chr1	9546171	A	G	160	56	0.125	1	26,22,5,3	LOW	MODIFIER	MODIFIER	NONE	NONE
chr1	9546180	C	T	165	57	0.122807	0	29,20,5,3	LOW	MODIFIER	MODIFIER	NONE	NONE
chr1	9546215	C	T	403	75	0.213333	4	32,27,11,5	MODERATE	MODIFIER	MODIFIER	NONE	NONE
chr1	9546223	C	T	398	77	0.207792	5	32,29,11,5	MODERATE	MODIFIER	MODIFIER	NONE	NONE
chr1	9546259	C	T	468	80	0.225	2	31,30,11,8	MODERATE	MODIFIER	MODIFIER	NONE	NONE
chr1	9546268	G	T	468	79	0.227848	0	36,25,11,7	MODERATE	MODIFIER	MODIFIER	NONE	NONE
chr1	9546313	G	A	314	69	0.188406	0	31,25,7,6	MODERATE	MODIFIER	MODIFIER	NONE	NONE
chr1	9546338	T	A	308	69	0.188406	1	25,31,7,6	MODERATE	MODIFIER	MODIFIER	NONE	NONE
chr1	9546341	G	T	305	71	0.183099	1	26,32,7,6	MODERATE	MODIFIER	MODIFIER	NONE	NONE
chr1	9546372	C	T	256	66	0.166667	2	22,33,6,5	LOW	MODIFIER	MODIFIER	NONE	NONE
chr1	9546377	C	T	242	62	0.16129	5	21,31,6,4	MODERATE	MODIFIER	MODIFIER	NONE	NONE
chr1	9546414	G	A	350	62	0.225806	14	15,33,9,5	LOW	MODIFIER	MODIFIER	NONE	NONE
chr1	9546452	G	A	559	59	0.338983	3	16,23,11,9	MODERATE	MODIFIER	MODIFIER	NONE	NONE
chr1	9546478	C	T	552	60	0.333333	1	16,20,12,12	MODERATE	MODIFIER	MODIFIER	NONE	NONE
chr1	9546504	G	C	461	55	0.309091	7	20,14,8,13	LOW	MODIFIER	MODIFIER	NONE	NONE
chr1	9546533	G	A	417	56	0.285714	17	24,15,4,13	MODERATE	MODIFIER	MODIFIER	NONE	NONE
chr1	9546572	C	G	215	62	0.145161	36	35,18,0,9	MODERATE	MODIFIER	MODIFIER	NONE	NONE
chr1	9546588	A	T	145	68	0.102941	27	39,22,0,7	LOW	MODIFIER	MODIFIER	NONE	NONE
chr1	9546857	G	T	301	164	0.085366	1	74,76,8,6	MODIFIER	MODIFIER	MODIFIER	NONE	NONE
chr1	9546876	C	T	296	159	0.08805	3	66,79,8,6	MODIFIER	MODIFIER	MODIFIER	NONE	NONE
chr1	9549819	T	C	3797	103	0.990291	0	0,0,98,5	MODIFIER	MODIFIER	MODIFIER	NONE	NONE
chr1	9630960	TTCTC	T	96	22	0.136364	0	18,0,3,0	MODIFIER	MODIFIER	NONE	NONE	downstream_gene_variant
chr1	9868359	CT	C	89	27	0.222222	6	17,2,4,2	MODIFIER	MODIFIER	MODIFIER	NONE	NONE
chr1	9942579	G	GA	123	203	0.059113	6	73,118,2,10	MODIFIER	MODIFIER	MODIFIER	NONE	NONE
chr1	9960872	CA	C	170	16	0.4375	0	9,0,7,0	MODIFIER	NONE	3_prime_UTR_variant	Tcf24	c.*2535delT
chr1	10045062	CT	C	72	96	0.0625	2	72,18,4,2	MODIFIER	NONE	intron_variant	Cspp1	c.-10-13delT
chr1	10085714	CT	C	90	47	0.148936	0	36,2,7,0	MODIFIER	NONE	intron_variant	Cspp1	c.1192-32delT
chr1	10090065	C	CT	80	27	0.222222	0	19,0,6,0	MODIFIER	NONE	intron_variant	Cspp1	c.1611-123_1611-122insT
chr1	11080212	T	TA	199	20	0.45	0	0,11,0,9	MODIFIER	NONE	intron_variant	Prex2	c.519+88_519+89insA
chr1	11101049	G	GT	163	222	0.067568	4	161,45,10,5	MODIFIER	NONE	intron_variant	Prex2	c.816-15_816-14insT
chr1	11101049	GT	G	107	222	0.04955	5	164,47,7,4	MODIFIER	NONE	intron_variant	Prex2	c.816-14delT
chr1	11289135	GT	G	175	14	0.571429	0	6,0,8,0	MODIFIER	MODIFIER	NONE	NONE	intron_variant
chr1	11562820	AT	A	276	47	0.297872	0	33,0,14,0	MODIFIER	MODIFIER	MODIFIER	MODIFIER	MODIFIER
chr1	12565424	A	T	341	37	0.324324	0	25,0,12,0	MODIFIER	NONE	intergenic_region	Mir6341-Gm17644	n.12565424A>T
chr1	12921039	A	G	218	41	0.195122	0	21,10,7,3	LOW	NONE	splice_region_variant&synonymous_variant	Slco5a1	c.1425T>C
chr1	12989801	G	A	746	74	0.351351	1	23,24,15,12	MODERATE	NONE	missense_variant	Slco5a1	c.695C>T
chr1	13152705	T	G	86	10	0.3	0	6,1,3,0	MODIFIER	MODIFIER	NONE	NONE	intron_variant
chr1	14304273	GCA	G	98	23	0.130435	0	18,1,3,0	MODIFIER	MODIFIER	MODIFIER	NONE	NONE
chr1	14756499	C	A	862	96	0.322917	1	30,26,24,16	MODIFIER	MODIFIER	NONE	NONE	upstream_gene_variant
chr1	14839251	CT	C	189	84	0.190476	4	65,1,15,1	MODIFIER	NONE	intergenic_region	Msc-Trpa1	n.14839252delT
chr1	14865194	G	T	286	46	0.304348	5	6,26,5,9	MODIFIER	NONE	intergenic_region	Msc-Trpa1	n.14865194G>T
chr1	14881577	A	C	275	54	0.185185	0	32,12,8,2	MODIFIER	NONE	intron_variant	Trpa1	c.2877+20T>G
chr1	15067612	GAA	G	163	34	0.323529	5	4,16,0,11	MODIFIER	NONE	intergenic_region	Trpa1-Kcnb2	n.15067613_15067614delAA
chr1	15268603	CT	C	272	61	0.295082	5	34,4,18,0	MODIFIER	NONE	intergenic_region	Trpa1-Kcnb2	n.15268604delT
chr1	16051007	T	C	184	12	0.5	0	0,6,0,6	MODIFIER	NONE	intergenic_region	Sbspon-4930444P10Rik	n.16051007T>C
chr1	16366030	TCA	T	122	44	0.090909	0	36,4,4,0	MODIFIER	MODIFIER	NONE	NONE	intron_variant
chr1	16462900	ATG	A	97	22	0.136364	0	18,0,3,0	MODIFIER	MODIFIER	NONE	NONE	intron_variant
chr1	16645562	ACT	A	94	27	0.111111	0	22,0,3,0	MODIFIER	MODIFIER	NONE	NONE	intron_variant
chr1	16709549	TACAC	T	80	94	0.031915	0	11,74,0,3	MODIFIER	MODIFIER	NONE	NONE	3_prime_UTR_variant
chr1	16709549	TAC	T	205	94	0.074468	2	11,74,0,7	MODIFIER	MODIFIER	NONE	NONE	3_prime_UTR_variant
chr1	17091241	TA	T	265	67	0.238806	0	45,4,15,1	MODIFIER	NONE	intron_variant	Jph1	c.1139+56delT
chr1	17394950	CA	C	112	19	0.368421	0	4,4,3,4	MODIFIER	NONE	intergenic_region	Gdap1-Pi15	n.17394951delA
chr1	17395318	A	T	196	31	0.225806	0	5,18,2,6	MODIFIER	NONE	intergenic_region	Gdap1-Pi15	n.17395318A>T
chr1	17400201	T	G	431	69	0.246377	0	25,27,8,9	MODIFIER	NONE	intergenic_region	Gdap1-Pi15	n.17400201T>G
chr1	17752818	CT	C	688	150	0.3	0	91,9,41,4	MODIFIER	NONE	intron_variant	Crispld1	c.1128-19delT
chr1	17756202	GA	G	665	128	0.304688	2	80,8,34,5	MODIFIER	NONE	intron_variant	Crispld1	c.1245-55delA
chr1	17948388	CA	C	286	144	0.090278	4	80,51,6,7	MODIFIER	NONE	intergenic_region	Crispld1-Crisp4	n.17948389delA
chr1	17999698	AGGG	A	119	23	0.304348	0	4,9,2,5	MODIFIER	NONE	intergenic_region	Crispld1-Crisp4	n.17999699_17999701delGGG
chr1	18130321	T	TA	114	25	0.24	0	0,20,0,6	MODIFIER	NONE	intron_variant	Crisp4	c.199-73_199-72insT
chr1	19153582	T	A	481	89	0.337079	3	39,18,19,13	MODIFIER	NONE	intron_variant	Tfap2d	c.1139+5165T>A
chr1	19153702	T	C	734	135	0.288889	1	43,51,17,24	MODIFIER	NONE	intron_variant	Tfap2d	c.1139+5285T>C
chr1	19153718	T	TG	218	131	0.145038	0	51,68,7,12	MODIFIER	NONE	intron_variant	Tfap2d	c.1139+5301_1139+5302insG
chr1	19153718	TG	T	428	131	0.244275	3	42,62,16,16	MODIFIER	NONE	intron_variant	Tfap2d	c.1139+5302delG
chr1	19214006	T	A	286	19	0.473684	6	10,0,7,2	MODERATE	MODERATE	MODERATE	NONE	NONE
chr1	19233959	A	G	214	20	0.35	0	12,0,8,0	MODIFIER	MODIFIER	MODIFIER	NONE	NONE
chr1	19234346	GA	G	180	27	0.37037	2	2,15,2,8	MODIFIER	MODIFIER	MODIFIER	NONE	NONE
chr1	19320419	A	G	433	36	0.388889	0	7,15,5,9	MODIFIER	NONE	intergenic_region	Tfap2b-Pkhd1	n.19320419A>G
chr1	19332585	ATG	A	86	53	0.056604	2	13,36,0,3	MODIFIER	NONE	intergenic_region	Tfap2b-Pkhd1	n.19332586_19332587delTG
chr1	19333013	G	T	382	38	0.342105	1	15,9,10,4	MODIFIER	NONE	intergenic_region	Tfap2b-Pkhd1	n.19333013G>T
chr1	20058690	G	A	444	62	0.258065	0	22,24,7,9	HIGH	NONE	stop_gained	Pkhd1	c.11788C>T
chr1	20117252	G	A	1484	157	0.33121	0	59,45,29,24	HIGH	NONE	stop_gained	Pkhd1	c.10831C>T
chr1	20197894	C	A	122	10	0.4	0	6,0,4,0	MODIFIER	NONE	intron_variant	Pkhd1	c.10135+124G>T
chr1	20288116	A	T	558	49	0.387755	1	28,2,17,2	MODIFIER	NONE	intron_variant	Pkhd1	c.8155+80T>A
chr1	20288270	TA	T	238	59	0.254237	0	9,33,3,12	MODIFIER	NONE	intron_variant	Pkhd1	c.8090-10delT
chr1	20391625	GA	G	109	49	0.142857	7	13,29,0,7	LOW	MODIFIER	NONE	NONE	splice_region_variant&intron_variant
chr1	20502862	GT	G	317	74	0.256757	0	53,2,19,0	MODIFIER	NONE	intron_variant	Pkhd1	c.5739+79delA
chr1	20558751	A	C	464	39	0.384615	0	7,17,5,10	LOW	NONE	synonymous_variant	Pkhd1	c.1971T>G
chr1	20817260	TCCACACAGA	T	511	64	0.234375	1	30,19,10,5	MODERATE	NONE	disruptive_inframe_deletion	Mcm3	c.374_382delTCTGTGTGG
chr1	21291206	TTC	T	261	25	0.32	0	16,1,8,0	MODIFIER	NONE	intron_variant	Gm4956	n.528+87_528+88delGA
chr1	21350488	T	G	254	26	0.461538	2	1,13,2,10	MODIFIER	NONE	intron_variant	Khdc1a	c.283+48T>G
chr1	22030056	C	CA	73	127	0.055118	5	65,56,2,5	MODIFIER	NONE	intergenic_region	Kcnq5-Rims1	n.22030056_22030057insA
chr1	22030056	CA	C	87	127	0.062992	0	63,57,4,4	MODIFIER	NONE	intergenic_region	Kcnq5-Rims1	n.22030057delA
chr1	22297043	CT	C	72	70	0.085714	0	22,43,2,4	MODIFIER	MODIFIER	MODIFIER	NONE	NONE
chr1	22346582	G	A	167	23	0.26087	9	7,10,0,6	MODIFIER	MODIFIER	MODIFIER	NONE	NONE
chr1	22363890	A	G	157	14	0.357143	0	1,8,1,4	MODIFIER	MODIFIER	MODIFIER	NONE	NONE
chr1	22379322	GACAC	G	98	22	0.136364	0	17,0,3,0	MODIFIER	MODIFIER	MODIFIER	NONE	NONE
chr1	22404592	GA	G	408	37	0.513514	6	2,16,0,19	MODIFIER	MODIFIER	MODIFIER	NONE	NONE
chr1	23378844	A	AAC	79	60	0.05	2	20,39,0,3	MODIFIER	NONE	intron_variant	Ogfrl1	c.325-41_325-40insGT
chr1	23378844	AAC	A	174	60	0.1	1	18,36,1,5	MODIFIER	NONE	intron_variant	Ogfrl1	c.325-42_325-41delGT
chr1	24194621	GCAA	G	137	98	0.05102	2	77,16,5,0	MODIFIER	MODIFIER	NONE	NONE	upstream_gene_variant
chr1	24197513	ATG	A	79	44	0.068182	0	9,34,0,3	LOW	LOW	NONE	NONE	splice_region_variant&intron_variant
chr1	24322266	GA	G	130	114	0.105263	10	36,67,1,11	MODIFIER	NONE	intron_variant	Col19a1	c.1753-9delT
chr1	24374645	CA	C	89	45	0.155556	0	5,35,0,7	MODIFIER	NONE	intron_variant	Col19a1	c.1216-10delT
chr1	24453880	CA	C	242	24	0.541667	8	2,7,0,13	MODIFIER	NONE	intron_variant	Col19a1	c.1072-84delT
chr1	24536944	G	A	1194	121	0.338843	9	48,32,18,23	HIGH	NONE	stop_gained	Col19a1	c.316C>T
chr1	24612748	A	AT	2413	1717	0.151427	30	179260140120	MODIFIER	NONE	intergenic_region	Col19a1-Lmbrd1	n.24612748_24612749insT
chr1	24612748	A	ATT	15135	1717	0.548631	39	179260490452	MODIFIER	NONE	intergenic_region	Col19a1-Lmbrd1	n.24612748_24612749insTT
chr1	24612748	A	ATTT	287	1717	0.041351	15	179,260,39,32	MODIFIER	NONE	intergenic_region	Col19a1-Lmbrd1	n.24612748_24612749insTTT
chr1	24612757	T	TTTA	263	1725	0.035942	3	827,839,34,28	MODIFIER	NONE	intergenic_region	Col19a1-Lmbrd1	n.24612757_24612758insTTA
chr1	24830421	T	TC	261	17	0.647059	2	5,1,7,4	MODIFIER	NONE	intergenic_region	Lmbrd1-Adgrb3	n.24830421_24830422insC
chr1	24975296	CT	C	146	21	0.380952	0	0,12,0,8	MODIFIER	NONE	intergenic_region	Lmbrd1-Adgrb3	n.24975297delT
chr1	25012696	G	T	902	77	0.402597	0	20,25,13,19	MODIFIER	NONE	intergenic_region	Lmbrd1-Adgrb3	n.25012696G>T
chr1	25068365	G	GA	99	36	0.166667	2	6,24,0,6	MODIFIER	NONE	intron_variant	Adgrb3	c.4381-10_4381-9insT
chr1	25223779	C	T	410	41	0.341463	1	13,14,8,6	MODIFIER	NONE	intron_variant	Adgrb3	c.2712-1917G>A
chr1	25226834	A	AG	220	50	0.24	1	7,31,3,9	MODIFIER	NONE	intron_variant	Adgrb3	c.2608-12_2608-11insC
chr1	26685864	T	C	643	53	0.396226	2	13,19,11,10	MODERATE	NONE	missense_variant	4931408C20Rik	c.234A>G
chr1	26687063	G	T	110	19	0.210526	0	15,0,4,0	MODIFIER	NONE	intron_variant	4931408C20Rik	c.186+178C>A
chr1	26687120	G	A	211	64	0.125	0	56,0,8,0	MODIFIER	NONE	intron_variant	4931408C20Rik	c.186+121C>T
chr1	26687136	T	A	276	92	0.119565	0	81,0,11,0	MODIFIER	NONE	intron_variant	4931408C20Rik	c.186+105A>T
chr1	26687144	TA	T	206	100	0.1	0	90,0,10,0	MODIFIER	NONE	intron_variant	4931408C20Rik	c.186+96delT
chr1	26687170	C	A	527	181	0.116022	0	156,4,21,0	MODIFIER	NONE	intron_variant	4931408C20Rik	c.186+71G>T
chr1	26687171	C	T	525	185	0.113514	0	159,5,21,0	MODIFIER	NONE	intron_variant	4931408C20Rik	c.186+70G>A
chr1	26687178	G	A	666	215	0.125581	4	176,11,28,0	MODIFIER	NONE	intron_variant	4931408C20Rik	c.186+63C>T
chr1	26687267	G	A	1228	428	0.121495	4	211,162,35,20	MODERATE	NONE	missense_variant	4931408C20Rik	c.160C>T
chr1	26687325	A	T	1047	392	0.117347	0	155,189,22,26	LOW	NONE	synonymous_variant	4931408C20Rik	c.102T>A
chr1	26687332	A	G	828	403	0.08933	0	159,207,16,21	MODERATE	NONE	missense_variant	4931408C20Rik	c.95T>C
chr1	26687400	A	T	3008	353	0.294618	4	84,164,41,64	MODERATE	NONE	missense_variant	4931408C20Rik	c.27T>A
chr1	26687461	G	A	758	171	0.169591	2	28,114,7,22	MODIFIER	MODIFIER	NONE	NONE	upstream_gene_variant
chr1	26687547	A	T	762	64	0.390625	2	1,36,2,25	MODIFIER	MODIFIER	NONE	NONE	upstream_gene_variant
chr1	26687670	T	A	112	17	0.235294	0	1,12,0,4	MODIFIER	MODIFIER	NONE	NONE	upstream_gene_variant
chr1	27042596	AAAC	A	97	25	0.12	0	0,22,0,3	MODIFIER	NONE	intergenic_region	4931408C20Rik-Gm597	n.27042597_27042599delAAC
chr1	27990959	A	G	700	78	0.307692	0	35,17,17,9	MODIFIER	NONE	intergenic_region	4931408C20Rik-Gm597	n.27990959A>G
chr1	27995353	CA	C	135	18	0.388889	0	0,11,0,7	MODIFIER	NONE	intergenic_region	4931408C20Rik-Gm597	n.27995354delA
chr1	28110018	G	A	126	35	0.142857	2	8,22,2,3	MODIFIER	NONE	intergenic_region	4931408C20Rik-Gm597	n.28110018G>A
chr1	28779919	TA	T	160	22	0.363636	0	14,0,8,0	MODIFIER	NONE	intron_variant	Gm597	c.165+114delT
chr1	28802653	G	T	416	22	0.590909	4	1,8,5,8	MODIFIER	NONE	intergenic_region	Gm597-Mir6342	n.28802653G>T
chr1	29152280	C	G	168	73	0.109589	0	39,25,5,3	MODIFIER	NONE	intergenic_region	Gm597-Mir6342	n.29152280C>G
chr1	29152362	G	GAA	145	61	0.147541	0	15,37,2,7	MODIFIER	NONE	intergenic_region	Gm597-Mir6342	n.29152362_29152363insAA
chr1	30769827	G	A	477	74	0.22973	0	32,20,14,8	MODIFIER	NONE	intergenic_region	Mir6342-Phf3	n.30769827G>A
chr1	30977295	T	C	287	38	0.263158	5	9,18,6,5	MODIFIER	NONE	intergenic_region	Ptp4a1-Gm29669	n.30977295T>C
chr1	32333449	GT	G	398	77	0.324675	1	46,4,22,3	MODIFIER	NONE	intron_variant	Khdrbs2	c.220-16delT
chr1	32517211	G	C	163	13	0.384615	0	6,1,6,0	MODIFIER	MODIFIER	NONE	NONE	downstream_gene_variant
chr1	33101808	A	G	764	68	0.382353	0	24,17,16,11	MODIFIER	NONE	intergenic_region	Khdrbs2-Prim2	n.33101808A>G
chr1	33657990	G	A	116	14	0.285714	0	6,4,2,2	MODIFIER	NONE	intron_variant	Prim2	c.459+4256C>T
chr1	33762216	TA	T	87	99	0.080808	0	18,75,1,7	LOW	LOW	MODIFIER	NONE	NONE
chr1	33777875	TA	T	79	41	0.170732	11	13,21,0,7	MODIFIER	MODIFIER	NONE	NONE	intron_variant
chr1	34217775	G	GT	434	97	0.278351	4	57,11,25,2	MODIFIER	MODIFIER	MODIFIER	NONE	NONE
chr1	34219372	GT	G	89	35	0.2	2	23,5,5,2	MODIFIER	MODIFIER	MODIFIER	NONE	NONE
chr1	34275603	TAC	T	313	28	0.321429	9	18,0,7,2	MODIFIER	MODIFIER	MODIFIER	NONE	NONE
chr1	34295353	TCA	T	88	47	0.06383	2	20,24,2,1	MODIFIER	MODIFIER	MODIFIER	NONE	NONE
chr1	34296653	TGA	T	126	34	0.117647	0	30,0,4,0	MODIFIER	MODIFIER	MODIFIER	NONE	NONE
chr1	36103505	C	T	497	66	0.272727	0	40,7,16,3	LOW	NONE	splice_region_variant&intron_variant	Hs6st1	c.528-8C>T
chr1	36176811	CA	C	210	152	0.125	8	51,78,4,15	MODIFIER	NONE	intron_variant	Uggt1	c.2237-13delT
chr1	36230856	TACACAC	T	110	10	0.3	0	0,7,0,3	MODIFIER	NONE	intron_variant	Uggt1	c.195-122_195-117delGTGTGT
chr1	36307741	G	T	131	30	0.166667	3	12,11,5,2	LOW	LOW	LOW	LOW	LOW
chr1	36564917	GGA	G	202	99	0.070707	1	25,71,1,6	MODIFIER	MODIFIER	NONE	NONE	intron_variant
chr1	36599959	GT	G	86	20	0.3	0	13,0,6,0	MODIFIER	MODIFIER	NONE	NONE	downstream_gene_variant
chr1	36771909	C	T	408	41	0.341463	1	8,17,6,10	MODERATE	MODERATE	MODERATE	NONE	NONE
chr1	36781475	C	G	90	22	0.318182	10	2,5,0,15	MODIFIER	MODIFIER	MODIFIER	MODIFIER	NONE
chr1	37046660	C	T	87	35	0.114286	0	24,7,3,1	MODIFIER	NONE	intergenic_region	Tmem131-Cnga3	n.37046660C>T
chr1	37164484	TC	T	152	115	0.104348	0	78,25,9,3	MODIFIER	NONE	intergenic_region	Tmem131-Cnga3	n.37164485delC
chr1	37374249	GTTT	G	150	122	0.131148	0	81,17,13,3	MODIFIER	MODIFIER	MODIFIER	MODIFIER	MODIFIER
chr1	37379888	A	G	641	107	0.224299	1	57,23,18,9	MODIFIER	MODIFIER	MODIFIER	MODIFIER	MODIFIER
chr1	37452638	T	TA	107	137	0.080292	0	21,108,1,10	MODIFIER	MODIFIER	NONE	NONE	intron_variant
chr1	37452638	TA	T	135	137	0.094891	0	20,107,2,11	MODIFIER	MODIFIER	NONE	NONE	intron_variant
chr1	38045375	T	A	442	116	0.146552	0	49,48,10,9	MODERATE	NONE	missense_variant	Eif5b	c.2443T>A
chr1	38320174	C	CA	220	44	0.272727	1	8,22,2,10	MODIFIER	NONE	intron_variant	Aff3	c.1040-12_1040-11insT
chr1	39300796	A	T	472	55	0.290909	3	1,38,1,15	MODIFIER	NONE	intron_variant	Npas2	c.363+63A>T
chr1	39328270	G	T	677	89	0.269663	3	43,21,19,6	MODIFIER	NONE	intron_variant	Npas2	c.908-37G>T
chr1	39405450	C	G	253	34	0.264706	1	9,14,3,8	MODERATE	NONE	missense_variant	Tbc1d8	c.427G>C
chr1	39406676	TA	T	104	10	0.5	0	5,1,4,1	MODIFIER	NONE	intron_variant	Tbc1d8	c.357+75delT
chr1	39624758	CAT	C	91	37	0.081081	0	34,0,3,0	MODIFIER	NONE	intron_variant	Creg2	c.719+110_719+111delAT
chr1	39683460	G	A	192	16	0.375	0	10,0,6,0	MODIFIER	NONE	intron_variant	Rfx8	c.856+140C>T
chr1	40345969	GC	G	106	17	0.352941	0	1,8,0,6	MODIFIER	NONE	intron_variant	Il1rl2	c.733+93delC
chr1	40353930	T	G	132	10	0.5	0	5,0,5,0	MODIFIER	NONE	intron_variant	Il1rl2	c.1000+2032T>G
chr1	40442574	CTTG	C	77	110	0.027273	0	54,54,2,1	MODIFIER	MODIFIER	MODIFIER	NONE	NONE
chr1	40452012	G	T	109	12	0.333333	0	0,8,0,4	MODIFIER	MODIFIER	MODIFIER	NONE	NONE
chr1	40484414	G	C	509	41	0.390244	0	1,24,0,16	MODIFIER	MODIFIER	MODIFIER	NONE	NONE
chr1	40500347	ATG	A	101	18	0.166667	0	15,0,3,0	MODIFIER	NONE	3_prime_UTR_variant	Il18r1	c.*1697_*1698delGT
chr1	40610217	CGT	C	123	44	0.090909	0	38,0,4,0	MODIFIER	NONE	intron_variant	Slc9a4	c.1489-99_1489-98delGT
chr1	42179828	C	T	194	29	0.241379	1	12,9,6,2	MODIFIER	NONE	intergenic_region	4930448I06Rik-Pantr1	n.42179828C>T
chr1	42862452	C	T	1137	40	0.85	0	5,1,27,7	MODIFIER	NONE	intron_variant	Mrps9	c.136-17C>T
chr1	43032772	G	T	558	83	0.253012	0	25,34,10,14	HIGH	NONE	stop_gained	Gpr45	c.574G>T
chr1	43975393	AT	A	98	116	0.086207	5	95,11,8,2	MODIFIER	MODIFIER	NONE	NONE	intron_variant
chr1	44010493	GT	G	77	57	0.122807	7	41,10,4,3	MODIFIER	NONE	intron_variant	Mettl21c	c.352+38delA
chr1	44129705	AACACAC	A	107	34	0.117647	2	6,21,0,4	MODIFIER	NONE	intron_variant	Bivm	c.898+29_898+34delACACAC
chr1	44175792	G	GTA	146	75	0.066667	2	53,16,5,0	MODIFIER	NONE	intron_variant	Ercc5	c.2531-47_2531-46insTA
chr1	44175792	GTA	G	83	75	0.04	0	56,16,3,0	MODIFIER	NONE	intron_variant	Ercc5	c.2531-46_2531-45delTA
chr1	44330908	G	T	239	23	0.347826	0	5,10,2,6	MODIFIER	NONE	intergenic_region	Mettl21e-Gulp1	n.44330908G>T
chr1	44708748	TA	T	413	55	0.381818	0	0,34,0,21	MODIFIER	NONE	intron_variant	Gulp1	c.90+71delA
chr1	45383744	T	G	177	25	0.24	0	0,19,0,6	MODIFIER	NONE	intron_variant	Col5a2	c.3358-46A>C
chr1	45389305	AAT	A	100	21	0.142857	0	16,0,3,0	MODIFIER	NONE	intron_variant	Col5a2	c.3033+65_3033+66delAT
chr1	45391638	GAAA	G	86	51	0.156863	15	31,8,3,5	MODIFIER	NONE	intron_variant	Col5a2	c.2709+21_2709+23delTTT
chr1	45436480	GAAT	G	125	23	0.173913	0	4,17,0,4	MODIFIER	NONE	intron_variant	Col5a2	c.364-72_364-70delATT
chr1	45602440	GA	G	158	32	0.34375	0	14,3,10,1	MODIFIER	NONE	intergenic_region	Col5a2-Wdr75	n.45602441delA
chr1	45857174	C	CT	83	16	0.3125	0	11,0,5,0	MODIFIER	NONE	intergenic_region	Wdr75-Slc40a1	n.45857174_45857175insT
chr1	45972070	G	T	354	30	0.366667	1	5,14,4,7	MODIFIER	NONE	intergenic_region	Slc40a1-Stk-ps2	n.45972070G>T
chr1	46116032	T	C	137	21	0.238095	0	13,1,5,0	MODIFIER	NONE	intron_variant	Dnah7b	c.876-137T>C
chr1	46137225	GT	G	84	10	0.4	0	6,0,4,0	MODIFIER	NONE	intron_variant	Dnah7b	c.2191-186delT
chr1	46137293	GA	G	196	29	0.344828	0	19,0,10,0	MODIFIER	NONE	intron_variant	Dnah7b	c.2191-118delA
chr1	46188719	TAC	T	134	94	0.074468	7	24,63,0,7	MODIFIER	NONE	intron_variant	Dnah7b	c.4067+35_4067+36delAC
chr1	46204169	TA	T	793	95	0.305263	0	58,8,25,4	MODIFIER	NONE	intron_variant	Dnah7b	c.4681-48delA
chr1	46217045	T	C	1177	119	0.336134	0	60,19,32,8	MODIFIER	NONE	intron_variant	Dnah7b	c.5539-32T>C
chr1	46243400	T	A	940	84	0.440476	7	3,44,6,31	MODERATE	NONE	missense_variant	Dnah7b	c.8692T>A
chr1	46300111	GA	G	238	43	0.302326	0	0,30,0,13	MODIFIER	NONE	intron_variant	Dnah7b	c.10215+104delA
chr1	46414867	TGGG	T	89	28	0.214286	0	0,17,0,6	MODIFIER	NONE	intergenic_region	Dnah7b-Dnah7c	n.46414868_46414870delGGG
chr1	46417021	A	AAAT	210	62	0.112903	4	12,43,0,7	MODIFIER	NONE	intergenic_region	Dnah7b-Dnah7c	n.46417021_46417022insAAT
chr1	46417021	AAATAAT	A	115	62	0.064516	2	12,45,0,4	MODIFIER	NONE	intergenic_region	Dnah7b-Dnah7c	n.46417022_46417027delAATAAT
chr1	46457415	A	C	502	81	0.222222	7	13,50,1,17	MODIFIER	NONE	intron_variant	Dnah7c	c.398+61A>C
chr1	46504238	GT	G	426	120	0.233333	0	8,85,2,26	MODIFIER	NONE	intron_variant	Dnah7c	c.989+87delT
chr1	46520801	AT	A	79	29	0.172414	0	0,24,0,5	MODIFIER	NONE	intron_variant	Dnah7c	c.1754+162delT
chr1	46607290	CAT	C	268	42	0.190476	0	34,0,8,0	MODIFIER	NONE	intron_variant	Dnah7c	c.3613-122_3613-121delAT
chr1	46631958	A	G	128	12	0.333333	0	8,0,4,0	MODIFIER	NONE	intron_variant	Dnah7c	c.4648-142A>G
chr1	46647087	A	G	122	149	0.040268	0	56,87,2,4	MODERATE	NONE	missense_variant	Dnah7c	c.5500A>G
chr1	46647108	A	C	1147	155	0.270968	3	44,66,15,30	MODERATE	NONE	missense_variant	Dnah7c	c.5521A>C
chr1	46647158	G	GA	83	110	0.063636	1	28,78,1,6	MODIFIER	NONE	intron_variant	Dnah7c	c.5538+33_5538+34insA
chr1	46659627	G	C	252	29	0.344828	0	0,19,0,10	MODIFIER	NONE	intron_variant	Dnah7c	c.6633+85G>C
chr1	48882180	AC	A	598	128	0.296875	6	30,46,20,18	MODIFIER	NONE	intergenic_region	Mir6350-Tmeff2	n.48882181delC
chr1	48882180	ACC	A	175	128	0.117188	4	30,46,8,7	MODIFIER	NONE	intergenic_region	Mir6350-Tmeff2	n.48882181_48882182delCC
chr1	50927995	C	T	504	75	0.253333	8	24,25,18,8	LOW	NONE	synonymous_variant	Tmeff2	c.48C>T
chr1	50943266	G	T	1051	117	0.316239	0	16,64,8,29	MODIFIER	NONE	intron_variant	Tmeff2	c.439+43G>T
chr1	51472425	T	A	407	83	0.277108	0	4,55,1,23	MODIFIER	MODIFIER	MODIFIER	NONE	NONE
chr1	51751342	CGGGGG	C	147	17	0.588235	18	12,4,2,8	MODIFIER	MODIFIER	MODIFIER	NONE	NONE
chr1	51757265	AAG	A	84	54	0.055556	0	21,31,1,2	MODIFIER	MODIFIER	MODIFIER	NONE	NONE
chr1	51769127	ATG	A	486	25	0.52	0	0,12,0,13	MODIFIER	MODIFIER	MODIFIER	NONE	NONE
chr1	52012028	ATG	A	92	28	0.107143	0	0,24,0,3	MODIFIER	MODIFIER	NONE	NONE	intron_variant
chr1	52090575	CT	C	88	121	0.066116	0	114,0,8,0	MODIFIER	MODIFIER	NONE	NONE	intron_variant
chr1	52139155	C	T	169	29	0.206897	1	15,8,3,3	MODIFIER	MODIFIER	MODIFIER	NONE	NONE
chr1	52585470	GTT	G	71	11	0.363636	0	0,7,0,4	MODIFIER	NONE	intergenic_region	Nab1-Nemp2	n.52585471_52585472delTT
chr1	52660601	C	CT	209	41	0.317073	0	26,0,13,0	MODIFIER	MODIFIER	NONE	NONE	3_prime_UTR_variant
chr1	52790310	G	A	149	18	0.277778	0	0,13,0,5	MODIFIER	NONE	intron_variant	Inpp1	c.642-93C>T
chr1	52885295	T	C	136	20	0.25	0	0,14,0,6	MODIFIER	NONE	intron_variant	Hibch	c.514+114T>C
chr1	53177606	TAC	T	96	23	0.130435	0	19,1,3,0	MODIFIER	NONE	intron_variant	1700019A02Rik	c.285+162_285+163delGT
chr1	53216084	C	CA	74	18	0.277778	0	14,0,5,0	MODIFIER	NONE	intron_variant	Pms1	c.699+146_699+147insT
chr1	53267790	TAC	T	86	54	0.055556	0	44,9,3,0	MODIFIER	NONE	intron_variant	Pms1	c.418+36_418+37delGT
chr1	53347685	G	C	1301	167	0.275449	1	64,57,26,20	MODERATE	MODIFIER	NONE	NONE	missense_variant
chr1	53427824	A	G	914	170	0.276471	1	95,26,37,12	HIGH	NONE	splice_donor_variant&intron_variant	Dnah7a	c.10878+2T>C
chr1	53457593	C	CACAT	140	78	0.102564	0	63,5,8,0	MODIFIER	NONE	intron_variant	Dnah7a	c.9425+77_9425+78insATGT
chr1	53457593	C	T	219	78	0.24359	2	55,3,18,2	MODIFIER	NONE	intron_variant	Dnah7a	c.9425+78G>A
chr1	53503703	T	C	1089	120	0.333333	0	39,41,19,21	MODERATE	NONE	missense_variant	Dnah7a	c.7307A>G
chr1	53537659	GA	G	448	100	0.27	4	16,58,3,24	MODIFIER	NONE	intron_variant	Dnah7a	c.4897-14delT
chr1	53605633	CT	C	119	18	0.333333	0	12,0,6,0	MODIFIER	NONE	intron_variant	Dnah7a	c.3078+164delA
chr1	53623298	C	CA	73	100	0.07	0	93,0,7,0	MODIFIER	NONE	intron_variant	Dnah7a	c.2058+44_2058+45insT
chr1	53623298	CA	C	579	100	0.34	0	61,0,34,0	MODIFIER	NONE	intron_variant	Dnah7a	c.2058+44delT
chr1	53924063	ACCCCC	A	73	10	0.4	0	0,5,0,4	MODIFIER	NONE	intron_variant	Hecw2	c.2357-74_2357-70delGGGGG
chr1	54364768	C	T	221	33	0.242424	1	18,6,6,3	MODIFIER	NONE	intron_variant	Ccdc150	c.2797-127C>T
chr1	54434263	TG	T	82	49	0.142857	0	14,30,2,5	MODIFIER	NONE	intron_variant	Gtf3c3	c.215-26delC
chr1	54492259	T	C	419	25	0.52	0	0,12,0,13	MODIFIER	NONE	intron_variant	Pgap1	c.2151-95A>G
chr1	54511331	GA	G	92	37	0.162162	0	29,1,6,0	MODIFIER	NONE	intron_variant	Pgap1	c.1728+62delT
chr1	54664008	AT	A	74	94	0.085106	2	10,75,0,8	MODIFIER	NONE	intron_variant	Ankrd44	c.1925-23delA
chr1	54997297	C	CT	704	21	0.857143	0	0,4,0,18	MODIFIER	NONE	intron_variant	Sf3b1	c.2719-104_2719-103insA
chr1	55014370	CA	C	77	45	0.155556	0	37,0,7,0	MODIFIER	NONE	intron_variant	Sf3b1	c.495+112delT
chr1	58001322	AT	A	114	92	0.097826	2	12,73,2,7	MODIFIER	MODIFIER	NONE	NONE	intron_variant
chr1	58047250	G	T	1060	103	0.359223	3	17,46,8,32	LOW	NONE	splice_region_variant&intron_variant	Aox1	c.306+7G>T
chr1	58095299	CTG	C	130	67	0.074627	0	4,61,0,5	MODIFIER	NONE	intron_variant	Aox1	c.3360+71_3360+72delTG
chr1	58097730	A	G	186	16	0.375	0	9,0,7,0	MODIFIER	NONE	intron_variant	Aox1	c.3414-136A>G
chr1	58102569	AT	A	774	151	0.284768	2	77,32,28,15	MODIFIER	NONE	intron_variant	Aox1	c.3529-15delT
chr1	58102713	G	GA	80	62	0.112903	0	4,54,0,7	MODIFIER	NONE	intron_variant	Aox1	c.3594+63_3594+64insA
chr1	58113402	G	A	355	33	0.363636	0	0,21,0,12	MODIFIER	NONE	intron_variant	Aox3	c.54+90G>A
chr1	58120871	TAC	T	132	13	0.307692	0	8,0,4,0	MODIFIER	NONE	intron_variant	Aox3	c.319-106_319-105delAC
chr1	58152821	CT	C	215	25	0.36	0	6,10,4,5	MODIFIER	NONE	intron_variant	Aox3	c.1448+84delT
chr1	58210540	T	C	1729	223	0.286996	0	104,52,45,22	MODIFIER	NONE	5_prime_UTR_variant	Aox4	c.-35T>C
chr1	58213130	C	G	168	35	0.257143	30	7,8,0,20	MODIFIER	NONE	intron_variant	Aox4	c.112+51C>G
chr1	58213136	T	G	291	30	0.4	4	1,3,2,24	MODIFIER	NONE	intron_variant	Aox4	c.112+57T>G
chr1	58263404	G	GT	74	179	0.055866	4	69,101,2,8	MODIFIER	NONE	intron_variant	Aox4	c.3422+9_3422+10insT
chr1	58263404	GT	G	519	179	0.223464	0	52,79,15,25	MODIFIER	NONE	intron_variant	Aox4	c.3422+10delT
chr1	58305122	AG	A	92	20	0.25	0	15,0,5,0	MODIFIER	NONE	intron_variant	Aox2	c.1455-81delG
chr1	58466161	A	AT	158	16	0.5	0	0,6,0,8	MODIFIER	MODIFIER	MODIFIER	MODIFIER	NONE
chr1	58647594	GT	G	197	82	0.195122	2	32,31,10,6	MODIFIER	NONE	intergenic_region	Ndufb3-Gm20257	n.58647595delT
chr1	58993044	A	G	623	75	0.293333	12	20,33,3,19	MODERATE	NONE	missense_variant	Stradb	c.977A>G
chr1	58994149	C	CT	328	10	1	2147483647	0,0,10,0	MODIFIER	NONE	intron_variant	Stradb	c.1114-144_1114-143insT
chr1	59067689	GA	G	304	64	0.3125	0	41,1,20,0	MODIFIER	NONE	intron_variant	Als2cr11	c.888+87delT
chr1	59068731	G	GA	84	88	0.079545	10	27,54,0,7	LOW	NONE	splice_region_variant&intron_variant	Als2cr11	c.775-5_775-4insT
chr1	59078083	G	GA	76	42	0.142857	0	0,38,0,6	MODIFIER	NONE	intron_variant	Als2cr11	c.364-115_364-114insT
chr1	59117374	AG	A	230	55	0.290909	14	24,23,3,13	MODIFIER	MODIFIER	MODIFIER	MODIFIER	NONE
chr1	59123576	T	G	130	27	0.185185	0	0,22,0,5	MODERATE	MODERATE	MODIFIER	MODIFIER	NONE
chr1	59123593	A	C	87	17	0.176471	0	0,14,0,3	MODIFIER	MODIFIER	MODIFIER	MODIFIER	NONE
chr1	59146501	ATG	A	113	38	0.105263	0	2,31,0,4	MODIFIER	MODIFIER	NONE	NONE	intron_variant
chr1	59151601	T	C	399	53	0.264151	1	34,3,14,2	MODIFIER	MODIFIER	NONE	NONE	intron_variant
chr1	59258582	T	TAC	107	12	0.25	0	9,0,3,0	MODIFIER	NONE	intron_variant	Cdk15	c.268-121_268-120insAC
chr1	59258582	TAC	T	106	12	0.25	0	9,0,3,0	MODIFIER	NONE	intron_variant	Cdk15	c.268-120_268-119delAC
chr1	59265495	GT	G	79	29	0.172414	0	24,0,5,0	MODIFIER	NONE	intron_variant	Cdk15	c.363-108delT
chr1	59280699	AGGG	A	326	51	0.352941	13	7,25,0,18	MODIFIER	NONE	intron_variant	Cdk15	c.537+37_537+39delGGG
chr1	59287632	TTCTC	T	82	38	0.078947	0	30,3,3,0	MODIFIER	NONE	intron_variant	Cdk15	c.601-129_601-126delTCTC
chr1	59344141	C	T	158	15	0.333333	0	10,0,5,0	MODIFIER	NONE	intron_variant	Cdk15	c.1193-107C>T
chr1	59556269	C	T	161	61	0.114754	1	30,24,3,4	LOW	NONE	synonymous_variant	Gm973	c.1218C>T
chr1	59692430	CT	C	364	59	0.322034	8	9,33,1,18	MODIFIER	MODIFIER	NONE	NONE	downstream_gene_variant
chr1	59705563	A	T	408	42	0.404762	0	23,0,17,0	MODIFIER	MODIFIER	NONE	NONE	downstream_gene_variant
chr1	60117726	G	GA	71	98	0.071429	5	13,80,2,5	MODIFIER	MODIFIER	MODIFIER	MODIFIER	NONE
chr1	60143863	T	C	266	17	0.470588	0	9,0,8,0	MODIFIER	MODIFIER	MODIFIER	MODIFIER	NONE
chr1	60181560	A	AT	88	20	0.25	0	15,0,5,0	MODIFIER	NONE	5_prime_UTR_variant	Nbeal1	c.-133dupT
chr1	60268363	C	CT	106	74	0.108108	1	54,12,6,2	MODIFIER	NONE	intron_variant	Nbeal1	c.5053-20_5053-19insT
chr1	60279913	T	TTCCA	97	24	0.125	0	1,20,0,3	MODIFIER	NONE	intron_variant	Nbeal1	c.5997+113_5997+114insTCCA
chr1	60352252	TG	T	122	18	0.388889	0	0,14,0,7	MODIFIER	MODIFIER	NONE	NONE	intron_variant
chr1	60503465	CA	C	77	112	0.080357	2	87,15,7,2	MODIFIER	NONE	intron_variant	Raph1	c.813+52delT
chr1	60704423	C	T	831	130	0.238462	5	69,29,26,6	MODIFIER	NONE	intergenic_region	Raph1-Cd28	n.60704423C>T
chr1	60909338	GT	G	332	53	0.358491	0	0,31,0,19	MODIFIER	MODIFIER	NONE	NONE	intron_variant
chr1	60948278	G	A	233	59	0.152542	3	16,34,4,5	MODIFIER	NONE	intergenic_region	Ctla4-Icos	n.60948278G>A
chr1	60994759	GT	G	204	31	0.419355	2	2,22,0,13	MODIFIER	NONE	intron_variant	Icos	c.504+44delT
chr1	60997586	GGT	G	89	26	0.115385	0	23,0,3,0	MODIFIER	NONE	intron_variant	Icos	c.590-114_590-113delGT
chr1	61981037	A	C	246	20	0.4	0	0,12,0,8	MODIFIER	NONE	intron_variant	Pard3b	c.223-29270A>C
chr1	62161417	G	T	616	59	0.355932	2	14,24,10,11	MODERATE	NONE	missense_variant	Pard3b	c.1114G>T
chr1	62216317	C	A	466	68	0.25	0	40,11,14,3	MODIFIER	NONE	intron_variant	Pard3b	c.1792-106C>A
chr1	62238696	TA	T	196	29	0.37931	0	18,0,11,0	MODIFIER	NONE	intron_variant	Pard3b	c.2025-140delA
chr1	62276043	G	T	196	13	0.461538	0	0,7,0,6	MODIFIER	NONE	intron_variant	Pard3b	c.2185+116G>T
chr1	63151739	A	AATAG	92	33	0.090909	0	1,30,0,3	MODIFIER	MODIFIER	MODIFIER	MODIFIER	MODIFIER
chr1	63551716	ATTT	A	247	69	0.289855	4	23,4,19,1	MODIFIER	NONE	intron_variant	Adam23	c.1386-44_1386-42delTTT
chr1	63551716	AT	A	150	69	0.202899	0	23,4,12,2	MODIFIER	NONE	intron_variant	Adam23	c.1386-44delT
chr1	63555334	C	CT	72	17	0.235294	0	0,14,0,4	MODIFIER	NONE	intron_variant	Adam23	c.1557+108_1557+109insT
chr1	63768989	C	A	175	14	0.428571	0	8,0,6,0	MODIFIER	NONE	intron_variant	4933402D24Rik	c.25+192G>T
chr1	64732748	A	G	118	48	0.333333	20	10,21,0,17	MODIFIER	MODIFIER	NONE	NONE	3_prime_UTR_variant
chr1	65021333	G	A	773	60	0.4	0	36,0,24,0	MODIFIER	MODIFIER	NONE	NONE	intron_variant
chr1	65159391	TA	T	205	80	0.2125	26	55,1,12,5	MODIFIER	MODIFIER	NONE	NONE	3_prime_UTR_variant
chr1	65222195	G	GT	74	89	0.067416	0	82,1,6,0	MODIFIER	MODIFIER	NONE	NONE	intron_variant
chr1	65234320	G	C	920	95	0.326316	19	37,27,26,5	LOW	LOW	NONE	NONE	synonymous_variant
chr1	65251706	T	C	1694	144	0.381944	4	17,69,8,50	MODIFIER	MODIFIER	NONE	NONE	intron_variant
chr1	65251716	C	CTATT	264	119	0.07563	4	18,94,0,9	MODIFIER	MODIFIER	NONE	NONE	intron_variant
chr1	65265407	ATG	A	444	60	0.233333	0	1,43,0,14	MODIFIER	MODIFIER	NONE	NONE	intron_variant
chr1	65268664	C	T	676	47	0.468085	0	20,5,17,5	MODIFIER	MODIFIER	NONE	NONE	intron_variant
chr1	65351625	T	G	198	56	0.125	38	14,14,1,27	MODIFIER	NONE	intron_variant	Pth2r	c.908+29T>G
chr1	65928250	T	C	616	58	0.362069	0	9,27,5,17	MODIFIER	NONE	3_prime_UTR_variant	Crygf	c.*7T>C
chr1	66033079	ATT	A	108	20	0.3	2	11,3,4,2	MODIFIER	NONE	intergenic_region	Crygf-Map2	n.66033080_66033081delTT
chr1	66414626	T	C	768	75	0.346667	8	26,21,10,18	MODERATE	MODIFIER	MODIFIER	NONE	NONE
chr1	66425141	CGT	C	138	17	0.235294	0	13,0,4,0	MODIFIER	MODIFIER	MODIFIER	NONE	NONE
chr1	66471990	G	A	534	44	0.409091	4	15,11,13,5	LOW	NONE	synonymous_variant	Unc80	c.156G>A
chr1	66525699	C	G	753	80	0.325	0	36,18,18,8	LOW	NONE	synonymous_variant	Unc80	c.2544C>G
chr1	66530674	TC	T	106	28	0.214286	0	20,2,6,0	MODIFIER	NONE	intron_variant	Unc80	c.2952-80delC
chr1	66569954	C	T	267	64	0.171875	4	23,28,3,9	LOW	NONE	synonymous_variant	Unc80	c.3801C>T
chr1	66618342	T	G	231	17	0.470588	0	0,9,0,8	MODIFIER	NONE	intron_variant	Unc80	c.4899+73T>G
chr1	66648986	A	G	1060	111	0.333333	1	43,31,20,17	MODERATE	NONE	missense_variant	Unc80	c.7142A>G
chr1	66683036	C	T	202	29	0.241379	0	22,0,7,0	MODIFIER	NONE	intron_variant	Unc80	c.9125-113C>T
chr1	66738009	T	A	461	42	0.357143	1	21,5,12,4	MODIFIER	MODIFIER	NONE	NONE	intron_variant
chr1	66854566	C	T	509	58	0.310345	0	34,5,17,2	MODIFIER	NONE	intron_variant	Acadl	c.371+58G>A
chr1	67139671	A	T	585	51	0.392157	0	31,0,20,0	MODIFIER	NONE	intron_variant	Cps1	c.127-86A>T
chr1	67198495	G	GA	264	32	0.40625	3	3,15,4,9	MODIFIER	NONE	intron_variant	Cps1	c.3141+13_3141+14insA
chr1	67209573	GT	G	96	32	0.21875	2	20,3,5,2	MODIFIER	NONE	intron_variant	Cps1	c.3481-22delT
chr1	68290593	A	T	195	11	0.545455	0	0,5,0,6	MODIFIER	NONE	intron_variant	Erbb4	c.1872-276T>A
chr1	68330395	C	T	93	13	0.230769	0	0,10,0,3	MODIFIER	NONE	intron_variant	Erbb4	c.1199-113G>A
chr1	68349229	A	G	469	36	0.444444	0	19,1,15,1	MODIFIER	NONE	intron_variant	Erbb4	c.741+72T>C
chr1	69873248	G	A	210	73	0.123288	3	4,60,1,8	LOW	LOW	NONE	NONE	synonymous_variant
chr1	70067750	CT	C	101	42	0.166667	0	34,0,7,0	MODIFIER	MODIFIER	NONE	NONE	intron_variant
chr1	71028039	C	A	153	19	0.263158	3	1,13,1,4	MODIFIER	NONE	3_prime_UTR_variant	Bard1	c.*2481G>T
chr1	71067145	T	C	1118	160	0.2625	9	55,63,13,29	MODERATE	NONE	missense_variant	Bard1	c.1322A>G
chr1	71612700	TA	T	95	49	0.142857	0	7,35,1,6	MODIFIER	MODIFIER	MODIFIER	MODIFIER	MODIFIER
chr1	71657293	GA	G	100	27	0.222222	0	0,22,0,6	MODIFIER	MODIFIER	MODIFIER	MODIFIER	MODIFIER
chr1	72087729	GT	G	109	20	0.35	0	12,0,7,0	MODIFIER	NONE	intergenic_region	4933417E11Rik-Mreg	n.72087730delT
chr1	72088525	CATTT	C	386	38	0.289474	2	3,26,0,11	MODIFIER	NONE	intergenic_region	4933417E11Rik-Mreg	n.72088526_72088529delATTT
chr1	72270159	C	CAT	102	18	0.166667	0	15,0,3,0	MODIFIER	NONE	intron_variant	Pecr	c.603+117_603+118insAT
chr1	72383596	CGT	C	121	23	0.173913	0	16,3,3,1	MODIFIER	NONE	intron_variant	Xrcc5	c.2045-105_2045-104delGT
chr1	72460042	TA	T	272	51	0.294118	0	3,38,1,14	MODIFIER	NONE	intron_variant	2022-03-04	c.514-7446delT
chr1	72651857	A	G	394	78	0.192308	0	24,39,6,9	LOW	NONE	splice_region_variant&intron_variant	Ankar	c.3463-3T>C
chr1	72933591	C	CT	143	38	0.236842	0	28,1,9,0	MODIFIER	NONE	intergenic_region	Igfbp5-Tnp1	n.72933591_72933592insT
chr1	72934084	TA	T	393	126	0.238095	1	85,6,29,1	MODIFIER	NONE	intergenic_region	Igfbp5-Tnp1	n.72934085delA
chr1	74079143	CCAA	C	89	44	0.068182	0	33,9,3,0	MODIFIER	MODIFIER	NONE	NONE	intron_variant
chr1	74279103	A	G	380	68	0.205882	0	23,28,8,9	LOW	MODIFIER	MODIFIER	NONE	NONE
chr1	74279596	A	G	372	41	0.317073	9	10,16,10,5	MODIFIER	MODIFIER	MODIFIER	MODIFIER	NONE
chr1	74350680	G	T	415	88	0.181818	3	24,41,11,12	MODERATE	MODERATE	NONE	NONE	missense_variant
chr1	74748060	A	G	191	17	0.352941	2	2,9,0,6	MODIFIER	NONE	intron_variant	Prkag3	c.74-36T>C
chr1	74885238	T	TG	324	13	0.769231	0	1,2,5,5	MODIFIER	MODIFIER	NONE	NONE	5_prime_UTR_variant
chr1	74892090	G	GA	79	28	0.178571	13	13,11,0,5	LOW	NONE	splice_region_variant&intron_variant	Cryba2	c.162-4_162-3insT
chr1	75128803	C	G	182	18	0.333333	0	11,0,7,0	MODIFIER	NONE	intron_variant	Slc23a3	c.1282+101G>C
chr1	75177538	TC	T	1751	48	0.958333	3	0,2,22,24	MODIFIER	MODIFIER	MODIFIER	MODIFIER	MODIFIER
chr1	75262239	G	C	672	63	0.365079	2	26,13,18,6	MODIFIER	NONE	intron_variant	Ptprn	c.175+84C>G
chr1	75401584	GAC	G	131	22	0.181818	0	2,16,0,4	MODIFIER	MODIFIER	MODIFIER	MODIFIER	NONE
chr1	75414561	T	C	96	12	0.25	0	0,8,0,4	MODIFIER	MODIFIER	NONE	NONE	intron_variant
chr1	75443207	TG	T	161	45	0.244444	0	13,29,3,8	MODIFIER	MODIFIER	NONE	NONE	downstream_gene_variant
chr1	75486756	G	A	2878	82	0.97561	0	0,0,41,41	MODERATE	MODIFIER	NONE	NONE	missense_variant
chr1	77050236	CA	C	671	41	0.780488	0	8,0,32,0	MODIFIER	NONE	intergenic_region	Mir6343-Epha4	n.77050237delA
chr1	77050277	CA	C	420	93	0.268817	1	62,6,22,3	MODIFIER	NONE	intergenic_region	Mir6343-Epha4	n.77050278delA
chr1	77050427	C	G	1286	168	0.267857	6	49,72,14,33	MODIFIER	NONE	intergenic_region	Mir6343-Epha4	n.77050427C>G
chr1	77065882	G	C	452	69	0.246377	2	37,15,14,3	MODIFIER	NONE	intergenic_region	Mir6343-Epha4	n.77065882G>C
chr1	77383027	T	C	358	55	0.254545	0	18,23,6,8	MODERATE	NONE	missense_variant	Epha4	c.2188A>G
chr1	77398451	C	T	669	78	0.307692	8	43,8,26,1	MODIFIER	NONE	intron_variant	Epha4	c.1715+43G>A
chr1	78360232	A	T	119	186	0.032258	0	59,120,2,4	LOW	NONE	splice_region_variant&intron_variant	Sgpp2	c.243+3A>T
chr1	78393638	T	TA	72	10	0.3	0	1,6,0,3	MODIFIER	NONE	intron_variant	Sgpp2	c.513+190_513+191insA
chr1	78471193	T	TA	89	112	0.080357	4	16,89,0,9	LOW	LOW	LOW	LOW	NONE
chr1	79435104	A	AG	157	28	0.178571	0	19,4,4,1	MODIFIER	MODIFIER	NONE	NONE	3_prime_UTR_variant
chr1	79623799	GA	G	141	54	0.203704	0	2,37,0,11	MODIFIER	NONE	intron_variant	Ap1s3	c.183-10delT
chr1	79801503	A	G	613	73	0.287671	0	30,20,15,8	MODERATE	NONE	missense_variant	Serpine2	c.938T>C
chr1	79821262	AAC	A	191	152	0.046053	8	80,65,6,1	MODIFIER	NONE	intron_variant	Serpine2	c.259+13_259+14delGT
chr1	80271626	C	A	1229	123	0.349593	7	12,64,13,34	MODERATE	MODERATE	NONE	NONE	missense_variant
chr1	80276558	T	TA	107	142	0.084507	15	54,79,1,11	MODIFIER	MODIFIER	NONE	NONE	intron_variant
chr1	80578770	TAC	T	84	30	0.1	0	3,27,0,3	MODIFIER	MODIFIER	NONE	NONE	intron_variant
chr1	82528717	A	AC	176	65	0.169231	10	35,19,4,7	MODIFIER	NONE	intron_variant	Col4a4	c.846+34_846+35insG
chr1	82532988	GGA	G	128	33	0.121212	0	9,20,1,3	MODIFIER	NONE	intron_variant	Col4a4	c.571-11_571-10delTC
chr1	82649827	CTG	C	218	104	0.086538	7	22,75,0,9	MODIFIER	NONE	intron_variant	Col4a3	c.324+28_324+29delTG
chr1	82651442	AAG	A	147	10	0.4	0	0,6,0,4	MODIFIER	NONE	intron_variant	Col4a3	c.441+136_441+137delAG
chr1	82652298	CG	C	826	23	0.956522	0	0,1,0,22	MODIFIER	NONE	intron_variant	Col4a3	c.468+112delG
chr1	83022237	TAG	T	70	11	0.181818	0	9,0,2,0	MODIFIER	NONE	intron_variant	Slc19a3	c.961+95_961+96delCT
chr1	83199755	A	C	126	13	0.307692	0	1,8,0,4	MODIFIER	MODIFIER	NONE	NONE	intron_variant
chr1	83206003	TA	T	482	74	0.27027	0	4,50,1,19	MODIFIER	MODIFIER	NONE	NONE	intron_variant
chr1	83212329	A	G	403	52	0.307692	7	29,7,10,6	MODIFIER	MODIFIER	MODIFIER	NONE	NONE
chr1	83276313	C	T	474	81	0.209877	2	36,23,12,10	LOW	NONE	synonymous_variant	Sphkap	c.3714G>A
chr1	83291084	GA	G	169	37	0.243243	2	4,25,2,7	MODIFIER	NONE	intron_variant	Sphkap	c.241-56delT
chr1	84751758	GA	G	104	61	0.147541	7	29,19,3,6	MODIFIER	NONE	intron_variant	Trip12	c.3182-46delT
chr1	84776419	GA	G	130	49	0.183673	0	10,29,2,7	LOW	NONE	splice_region_variant&intron_variant	Trip12	c.1229-8delT
chr1	84963594	T	C	134	73	0.136986	2	56,7,10,0	MODIFIER	NONE	intergenic_region	Slc16a14-A530032D15Rik	n.84963594T>C
chr1	84963630	T	C	123	80	0.125	9	53,17,10,0	MODIFIER	NONE	intergenic_region	Slc16a14-A530032D15Rik	n.84963630T>C
chr1	84963930	C	A	267	190	0.147368	0	158,3,29,0	MODIFIER	NONE	intergenic_region	Slc16a14-A530032D15Rik	n.84963930C>A
chr1	84963955	C	T	209	261	0.099617	0	229,3,29,0	MODIFIER	NONE	intergenic_region	Slc16a14-A530032D15Rik	n.84963955C>T
chr1	84963959	G	A	271	285	0.115789	0	249,2,34,0	MODIFIER	NONE	intergenic_region	Slc16a14-A530032D15Rik	n.84963959G>A
chr1	84963963	A	G	315	304	0.125	0	263,2,39,0	MODIFIER	NONE	intergenic_region	Slc16a14-A530032D15Rik	n.84963963A>G
chr1	84963968	G	C	1809	314	0.404459	2	184,2,128,0	MODIFIER	NONE	intergenic_region	Slc16a14-A530032D15Rik	n.84963968G>C
chr1	84964053	G	C	1497	1109	0.134355	1	568,385,94,60	MODIFIER	NONE	intergenic_region	Slc16a14-A530032D15Rik	n.84964053G>C
chr1	84964112	T	A	1899	1342	0.136364	0	490,665,77,110	MODIFIER	NONE	intergenic_region	Slc16a14-A530032D15Rik	n.84964112T>A
chr1	84964150	C	T	1537	883	0.157418	1	272,468,55,88	MODIFIER	NONE	intergenic_region	Slc16a14-A530032D15Rik	n.84964150C>T
chr1	84964261	G	C	574	445	0.132584	10	230,155,28,31	MODIFIER	NONE	intergenic_region	Slc16a14-A530032D15Rik	n.84964261G>C
chr1	84964279	G	A	539	543	0.108656	6	334,149,37,23	MODIFIER	NONE	intergenic_region	Slc16a14-A530032D15Rik	n.84964279G>A
chr1	84964286	G	A	131	577	0.041594	6	393,160,20,4	MODIFIER	NONE	intergenic_region	Slc16a14-A530032D15Rik	n.84964286G>A
chr1	84964347	C	G	412	662	0.08006	34	344,263,17,38	MODIFIER	NONE	intergenic_region	Slc16a14-A530032D15Rik	n.84964347C>G
chr1	84964355	G	A	92	655	0.032061	28	344,290,4,17	MODIFIER	NONE	intergenic_region	Slc16a14-A530032D15Rik	n.84964355G>A
chr1	84964539	C	T	788	494	0.135628	6	54,365,5,63	MODIFIER	NONE	intergenic_region	Slc16a14-A530032D15Rik	n.84964539C>T
chr1	84964546	A	G	171	422	0.052133	6	37,363,0,22	MODIFIER	NONE	intergenic_region	Slc16a14-A530032D15Rik	n.84964546A>G
chr1	84964611	AC	A	135	106	0.113208	0	4,95,0,12	MODIFIER	NONE	intergenic_region	Slc16a14-A530032D15Rik	n.84964612delC
chr1	84990532	G	C	148	85	0.294118	2	59,1,24,1	MODIFIER	NONE	intergenic_region	Slc16a14-A530032D15Rik	n.84990532G>C
chr1	84990542	CAG	C	484	107	0.205607	2	80,5,22,0	MODIFIER	NONE	intergenic_region	Slc16a14-A530032D15Rik	n.84990543_84990544delAG
chr1	84990552	CAG	C	682	136	0.169118	10	109,4,20,3	MODIFIER	NONE	intergenic_region	Slc16a14-A530032D15Rik	n.84990553_84990554delAG
chr1	84990554	G	GAGAGAGAC	88	141	0.028369	0	131,9,4,0	MODIFIER	NONE	intergenic_region	Slc16a14-A530032D15Rik	n.84990554_84990555insAGAGAGAC
chr1	84990591	C	T	1540	274	0.240876	3	158,40,64,12	MODIFIER	NONE	intergenic_region	Slc16a14-A530032D15Rik	n.84990591C>T
chr1	84990595	C	T	268	293	0.054608	13	217,60,16,0	MODIFIER	NONE	intergenic_region	Slc16a14-A530032D15Rik	n.84990595C>T
chr1	84990596	G	T	1078	309	0.161812	3	202,54,43,8	MODIFIER	NONE	intergenic_region	Slc16a14-A530032D15Rik	n.84990596G>T
chr1	84990601	A	C	357	329	0.06383	22	233,75,21,0	MODIFIER	NONE	intergenic_region	Slc16a14-A530032D15Rik	n.84990601A>C
chr1	84990615	A	G	546	361	0.085873	35	223,107,30,1	MODIFIER	NONE	intergenic_region	Slc16a14-A530032D15Rik	n.84990615A>G
chr1	84990622	G	A	2818	367	0.316076	0	165,84,79,38	MODIFIER	NONE	intergenic_region	Slc16a14-A530032D15Rik	n.84990622G>A
chr1	84990766	T	C	701	102	0.352941	2	3,62,0,37	MODIFIER	NONE	intergenic_region	Slc16a14-A530032D15Rik	n.84990766T>C
chr1	84990794	A	G	406	54	0.37037	0	0,33,0,21	MODIFIER	NONE	intergenic_region	Slc16a14-A530032D15Rik	n.84990794A>G
chr1	84990813	A	T	313	41	0.365854	0	0,25,0,16	MODIFIER	NONE	intergenic_region	Slc16a14-A530032D15Rik	n.84990813A>T
chr1	85012164	G	C	216	125	0.088	7	68,42,6,9	MODIFIER	NONE	intergenic_region	Slc16a14-A530032D15Rik	n.85012164G>C
chr1	85012254	T	C	1149	91	0.472527	0	14,26,17,34	MODIFIER	NONE	intergenic_region	Slc16a14-A530032D15Rik	n.85012254T>C
chr1	85012294	G	A	270	71	0.183099	2	18,33,5,15	MODIFIER	NONE	intergenic_region	Slc16a14-A530032D15Rik	n.85012294G>A
chr1	85012315	C	A	258	72	0.180556	19	26,32,1,13	MODIFIER	NONE	intergenic_region	Slc16a14-A530032D15Rik	n.85012315C>A
chr1	85012466	A	G	247	52	0.269231	0	25,13,10,4	MODIFIER	NONE	intergenic_region	Slc16a14-A530032D15Rik	n.85012466A>G
chr1	85012565	G	T	109	75	0.093333	19	29,36,7,0	MODIFIER	NONE	intergenic_region	Slc16a14-A530032D15Rik	n.85012565G>T
chr1	85012628	G	A	105	55	0.090909	1	15,35,2,3	MODIFIER	NONE	intergenic_region	Slc16a14-A530032D15Rik	n.85012628G>A
chr1	85012787	TAA	T	138	32	0.28125	2	3,17,0,9	MODIFIER	NONE	intergenic_region	Slc16a14-A530032D15Rik	n.85012788_85012789delAA
chr1	85028339	G	A	159	182	0.104396	11	123,40,18,1	MODIFIER	NONE	intergenic_region	Slc16a14-A530032D15Rik	n.85028339G>A
chr1	85028396	C	T	387	325	0.126154	25	239,43,43,0	MODIFIER	NONE	intergenic_region	Slc16a14-A530032D15Rik	n.85028396C>T
chr1	85028524	A	T	3944	656	0.362805	23	86,319,31,219	MODIFIER	NONE	intergenic_region	Slc16a14-A530032D15Rik	n.85028524A>T
chr1	85028557	C	T	502	369	0.121951	13	51,271,2,45	MODIFIER	NONE	intergenic_region	Slc16a14-A530032D15Rik	n.85028557C>T
chr1	85041638	T	C	110	18	0.222222	0	14,0,4,0	MODIFIER	NONE	intergenic_region	Slc16a14-A530032D15Rik	n.85041638T>C
chr1	85041867	G	A	1036	201	0.308458	15	48,89,33,31	MODIFIER	NONE	intergenic_region	Slc16a14-A530032D15Rik	n.85041867G>A
chr1	85041930	T	C	102	80	0.125	0	0,70,0,10	MODIFIER	NONE	intergenic_region	Slc16a14-A530032D15Rik	n.85041930T>C
chr1	85061132	G	GA	399	78	0.294872	0	53,2,23,0	MODIFIER	NONE	intergenic_region	Slc16a14-A530032D15Rik	n.85061132_85061133insA
chr1	85061133	AAAAAAAAAAG	A	224	80	0.1375	5	68,1,10,1	MODIFIER	NONE	intergenic_region	Slc16a14-A530032D15Rik	n.85061134_85061143delAAAAAAAAAG
chr1	85061197	T	C	1121	114	0.403509	3	43,20,31,20	MODIFIER	NONE	intergenic_region	Slc16a14-A530032D15Rik	n.85061197T>C
chr1	85061209	G	T	569	110	0.245455	5	44,36,20,10	MODIFIER	NONE	intergenic_region	Slc16a14-A530032D15Rik	n.85061209G>T
chr1	85062527	GT	G	445	94	0.329787	2	50,14,26,5	MODIFIER	NONE	intergenic_region	Slc16a14-A530032D15Rik	n.85062528delT
chr1	85067689	A	G	100	144	0.083333	0	110,22,10,2	MODIFIER	NONE	intergenic_region	Slc16a14-A530032D15Rik	n.85067689A>G
chr1	85067736	A	G	319	162	0.185185	1	70,61,18,13	MODIFIER	NONE	intergenic_region	Slc16a14-A530032D15Rik	n.85067736A>G
chr1	85067855	A	T	140	55	0.181818	6	3,42,2,8	MODIFIER	NONE	intergenic_region	Slc16a14-A530032D15Rik	n.85067855A>T
chr1	85068890	T	C	322	68	0.25	36	27,24,17,0	MODIFIER	NONE	intergenic_region	Slc16a14-A530032D15Rik	n.85068890T>C
chr1	85074990	G	T	252	105	0.152381	0	88,0,17,0	MODIFIER	NONE	intergenic_region	Slc16a14-A530032D15Rik	n.85074990G>T
chr1	85075007	T	C	752	152	0.25	6	114,0,37,1	MODIFIER	NONE	intergenic_region	Slc16a14-A530032D15Rik	n.85075007T>C
chr1	85075021	AC	A	578	208	0.153846	2	169,7,32,0	MODIFIER	NONE	intergenic_region	Slc16a14-A530032D15Rik	n.85075022delC
chr1	85075027	T	C	1813	240	0.341667	5	145,12,80,3	MODIFIER	NONE	intergenic_region	Slc16a14-A530032D15Rik	n.85075027T>C
chr1	85075029	T	A	148	255	0.047059	0	227,16,12,0	MODIFIER	NONE	intergenic_region	Slc16a14-A530032D15Rik	n.85075029T>A
chr1	85075059	A	C	8114	410	0.702439	6	95,23,249,42	MODIFIER	NONE	intergenic_region	Slc16a14-A530032D15Rik	n.85075059A>C
chr1	85075069	G	A	1219	470	0.144681	34	316,85,66,3	MODIFIER	NONE	intergenic_region	Slc16a14-A530032D15Rik	n.85075069G>A
chr1	85075098	G	T	1859	607	0.176277	20	331,166,86,22	MODIFIER	NONE	intergenic_region	Slc16a14-A530032D15Rik	n.85075098G>T
chr1	85075112	T	G	442	662	0.055891	7	351,273,26,12	MODIFIER	NONE	intergenic_region	Slc16a14-A530032D15Rik	n.85075112T>G
chr1	85075163	C	T	542	536	0.076493	0	151,341,12,30	MODIFIER	NONE	intergenic_region	Slc16a14-A530032D15Rik	n.85075163C>T
chr1	85075164	G	A	446	533	0.067542	5	145,352,14,22	MODIFIER	NONE	intergenic_region	Slc16a14-A530032D15Rik	n.85075164G>A
chr1	85075189	T	C	1120	413	0.157385	6	43,304,4,61	MODIFIER	NONE	intergenic_region	Slc16a14-A530032D15Rik	n.85075189T>C
chr1	85075240	C	A	546	172	0.174419	2	5,136,2,29	MODIFIER	NONE	intergenic_region	Slc16a14-A530032D15Rik	n.85075240C>A
chr1	85075245	T	C	238	161	0.099379	0	6,138,0,17	MODIFIER	NONE	intergenic_region	Slc16a14-A530032D15Rik	n.85075245T>C
chr1	85075268	T	C	123	114	0.078947	0	2,103,0,9	MODIFIER	NONE	intergenic_region	Slc16a14-A530032D15Rik	n.85075268T>C
chr1	85075297	C	A	92	76	0.078947	0	2,68,0,6	MODIFIER	NONE	intergenic_region	Slc16a14-A530032D15Rik	n.85075297C>A
chr1	85075327	C	G	199	33	0.242424	0	1,24,0,8	MODIFIER	NONE	intergenic_region	Slc16a14-A530032D15Rik	n.85075327C>G
chr1	85075419	T	G	202	11	0.545455	0	0,5,0,6	MODIFIER	NONE	intergenic_region	Slc16a14-A530032D15Rik	n.85075419T>G
chr1	85080227	C	A	99	96	0.072917	19	41,48,7,0	MODIFIER	NONE	intergenic_region	Slc16a14-A530032D15Rik	n.85080227C>A
chr1	85084921	A	G	204	20	0.45	0	11,0,9,0	MODIFIER	MODIFIER	NONE	NONE	downstream_gene_variant
chr1	85084949	T	A	320	45	0.311111	0	31,0,14,0	MODIFIER	MODIFIER	NONE	NONE	downstream_gene_variant
chr1	85084954	C	G	931	53	0.660377	0	16,0,37,0	MODIFIER	MODIFIER	NONE	NONE	downstream_gene_variant
chr1	85085007	C	G	546	176	0.164773	11	129,14,33,0	MODIFIER	MODIFIER	NONE	NONE	downstream_gene_variant
chr1	85085062	T	G	545	255	0.129412	4	166,54,29,6	MODIFIER	MODIFIER	NONE	NONE	downstream_gene_variant
chr1	85085068	A	G	636	260	0.146154	18	149,71,35,5	MODIFIER	MODIFIER	NONE	NONE	downstream_gene_variant
chr1	85085131	G	A	940	281	0.188612	6	66,158,12,44	MODIFIER	MODIFIER	NONE	NONE	downstream_gene_variant
chr1	85085168	G	A	957	228	0.22807	2	19,157,4,48	MODIFIER	MODIFIER	NONE	NONE	downstream_gene_variant
chr1	85085190	C	T	773	161	0.254658	2	3,117,2,39	MODIFIER	MODIFIER	NONE	NONE	downstream_gene_variant
chr1	85085231	T	A	116	72	0.111111	0	0,63,0,9	MODIFIER	MODIFIER	NONE	NONE	downstream_gene_variant
chr1	85085235	T	C	189	64	0.1875	0	0,52,0,12	MODIFIER	MODIFIER	NONE	NONE	downstream_gene_variant
chr1	85089575	C	G	1754	447	0.210291	7	147,204,48,48	LOW	NONE	synonymous_variant	A530032D15Rik	c.549G>C
chr1	85089584	A	G	6352	434	0.571429	23	60123117134	LOW	NONE	splice_region_variant&intron_variant	A530032D15Rik	c.544-4T>C
chr1	85091003	C	T	248	32	0.4375	6	17,0,13,2	MODIFIER	NONE	intron_variant	A530032D15Rik	c.543+74G>A
chr1	85091036	C	A	326	58	0.344828	2	35,2,21,0	MODIFIER	NONE	intron_variant	A530032D15Rik	c.543+41G>T
chr1	85094043	C	A	118	11	0.363636	0	6,1,4,0	MODIFIER	NONE	intron_variant	A530032D15Rik	c.430+254G>T
chr1	85094048	G	T	114	14	0.285714	0	9,1,4,0	MODIFIER	NONE	intron_variant	A530032D15Rik	c.430+249C>A
chr1	85094064	C	T	109	18	0.222222	0	13,1,4,0	MODIFIER	NONE	intron_variant	A530032D15Rik	c.430+233G>A
chr1	85094146	A	T	256	66	0.19697	0	53,0,13,0	MODIFIER	NONE	intron_variant	A530032D15Rik	c.430+151T>A
chr1	85094316	G	A	497	671	0.086438	0	323,287,32,27	LOW	NONE	synonymous_variant	A530032D15Rik	c.411C>T
chr1	85094364	A	G	711	381	0.165354	0	13,305,2,61	LOW	NONE	splice_region_variant&intron_variant	A530032D15Rik	c.368-5T>C
chr1	85094399	C	T	283	237	0.113924	0	0,210,0,27	MODIFIER	NONE	intron_variant	A530032D15Rik	c.368-40G>A
chr1	85094468	G	C	205	54	0.259259	0	0,40,0,14	MODIFIER	NONE	intron_variant	A530032D15Rik	c.368-109C>G
chr1	85094509	T	C	91	25	0.24	0	0,19,0,6	MODIFIER	NONE	intron_variant	A530032D15Rik	c.368-150A>G
chr1	85097021	G	A	92	24	0.166667	0	20,0,4,0	MODIFIER	NONE	intron_variant	A530032D15Rik	c.367+2456C>T
chr1	85097024	C	G	87	24	0.166667	0	20,0,4,0	MODIFIER	NONE	intron_variant	A530032D15Rik	c.367+2453G>C
chr1	85097122	G	A	103	54	0.12963	2	39,7,7,0	MODIFIER	NONE	intron_variant	A530032D15Rik	c.367+2355C>T
chr1	85097146	TA	T	190	81	0.160494	12	52,16,13,0	MODIFIER	NONE	intron_variant	A530032D15Rik	c.367+2330delT
chr1	85097300	A	T	172	64	0.1875	0	2,50,0,12	MODIFIER	NONE	intron_variant	A530032D15Rik	c.367+2177T>A
chr1	85097306	C	G	131	70	0.142857	0	2,58,0,10	MODIFIER	NONE	intron_variant	A530032D15Rik	c.367+2171G>C
chr1	85098222	G	A	132	14	0.357143	2	4,5,1,4	MODIFIER	NONE	intron_variant	A530032D15Rik	c.367+1255C>T
chr1	85099243	T	A	108	12	0.416667	0	6,1,5,0	MODIFIER	NONE	intron_variant	A530032D15Rik	c.367+234A>T
chr1	85099337	G	T	209	41	0.243902	0	25,1,14,0	MODIFIER	NONE	intron_variant	A530032D15Rik	c.367+140C>A
chr1	85099339	C	T	194	43	0.232558	0	15,1,15,0	MODIFIER	NONE	intron_variant	A530032D15Rik	c.367+138G>A
chr1	85099347	G	T	172	43	0.209302	0	27,1,15,0	MODIFIER	NONE	intron_variant	A530032D15Rik	c.367+130C>A
chr1	85099399	CGG	C	165	70	0.157143	0	59,1,11,0	MODIFIER	NONE	intron_variant	A530032D15Rik	c.367+76_367+77delCC
chr1	85099401	G	A	182	69	0.304348	0	30,1,24,0	MODIFIER	NONE	intron_variant	A530032D15Rik	c.367+76C>T
chr1	85099429	G	A	190	185	0.178378	2	123,21,37,4	MODIFIER	NONE	intron_variant	A530032D15Rik	c.367+48C>T
chr1	85099484	G	A	2193	531	0.229755	5	245,157,72,57	LOW	NONE	synonymous_variant	A530032D15Rik	c.360C>T
chr1	85099523	C	T	2201	634	0.197161	16	247,262,46,79	LOW	NONE	synonymous_variant	A530032D15Rik	c.321G>A
chr1	85099553	C	A	1487	472	0.184322	5	138,247,25,62	LOW	NONE	synonymous_variant	A530032D15Rik	c.291G>T
chr1	85099723	A	G	213	114	0.149123	0	0,97,0,17	MODIFIER	NONE	intron_variant	A530032D15Rik	c.196-75T>C
chr1	85100198	A	T	89	153	0.039216	13	82,64,7,0	MODIFIER	NONE	intron_variant	A530032D15Rik	c.195+334T>A
chr1	85100296	C	T	102	189	0.05291	25	97,81,11,0	MODIFIER	NONE	intron_variant	A530032D15Rik	c.195+236G>A
chr1	85100322	G	A	128	208	0.057692	28	107,89,12,0	MODIFIER	NONE	intron_variant	A530032D15Rik	c.195+210C>T
chr1	85100342	C	G	111	260	0.046154	2	135,112,8,4	MODIFIER	NONE	intron_variant	A530032D15Rik	c.195+190G>C
chr1	85100420	A	G	1741	426	0.239437	3	178,145,62,41	MODIFIER	NONE	intron_variant	A530032D15Rik	c.195+112T>C
chr1	85100449	T	C	3704	329	0.49848	4	91,69,86,83	MODIFIER	NONE	intron_variant	A530032D15Rik	c.195+83A>G
chr1	85100567	G	A	859	93	0.505376	0	0,45,0,48	HIGH	NONE	stop_gained	A530032D15Rik	c.160C>T
chr1	85100672	C	T	301	40	0.425	2	1,22,2,15	MODERATE	NONE	missense_variant	A530032D15Rik	c.55G>A
chr1	85112262	C	T	290	17	0.588235	4	5,1,11,0	MODIFIER	MODIFIER	NONE	NONE	upstream_gene_variant
chr1	85112340	G	A	295	95	0.147368	0	80,1,14,0	MODIFIER	MODIFIER	NONE	NONE	upstream_gene_variant
chr1	85112363	G	T	728	135	0.22963	0	101,1,32,0	MODIFIER	MODIFIER	NONE	NONE	upstream_gene_variant
chr1	85112378	G	T	441	176	0.125	0	152,1,23,0	MODIFIER	MODIFIER	NONE	NONE	upstream_gene_variant
chr1	85112393	T	C	316	221	0.072398	0	202,1,18,0	MODIFIER	MODIFIER	NONE	NONE	upstream_gene_variant
chr1	85112395	T	A	391	225	0.088889	0	202,1,21,0	MODIFIER	MODIFIER	NONE	NONE	upstream_gene_variant
chr1	85112398	T	C	6720	234	0.858974	9	26,1,207,0	MODIFIER	MODIFIER	NONE	NONE	upstream_gene_variant
chr1	85112475	C	G	771	680	0.057353	2	517,123,30,9	MODIFIER	MODIFIER	NONE	NONE	upstream_gene_variant
chr1	85112482	G	A	731	693	0.054834	1	508,146,29,10	MODIFIER	MODIFIER	NONE	NONE	upstream_gene_variant
chr1	85112557	T	C	956	532	0.093985	3	109,371,9,42	MODIFIER	MODIFIER	NONE	NONE	upstream_gene_variant
chr1	85112566	ACT	A	811	487	0.080082	20	61,390,0,39	MODIFIER	MODIFIER	NONE	NONE	upstream_gene_variant
chr1	85112615	A	T	423	384	0.0625	6	27,332,0,25	MODIFIER	MODIFIER	NONE	NONE	upstream_gene_variant
chr1	85112676	C	G	351	185	0.091892	0	0,168,0,17	MODIFIER	MODIFIER	NONE	NONE	upstream_gene_variant
chr1	85112768	C	A	187	49	0.163265	13	3,38,3,5	MODIFIER	MODIFIER	NONE	NONE	upstream_gene_variant
chr1	85112904	C	T	897	43	0.744186	5	10,1,32,0	MODIFIER	MODIFIER	NONE	NONE	upstream_gene_variant
chr1	85112976	G	A	131	138	0.065217	5	125,3,9,1	MODIFIER	MODIFIER	NONE	NONE	upstream_gene_variant
chr1	85113010	C	T	1367	353	0.175637	0	245,44,55,9	MODIFIER	MODIFIER	NONE	NONE	upstream_gene_variant
chr1	85113011	G	T	366	361	0.060942	0	288,51,19,3	MODIFIER	MODIFIER	NONE	NONE	upstream_gene_variant
chr1	85113012	C	A	395	374	0.064171	0	298,52,21,3	MODIFIER	MODIFIER	NONE	NONE	upstream_gene_variant
chr1	85113047	G	A	1414	590	0.113559	4	400,119,51,20	MODIFIER	MODIFIER	NONE	NONE	upstream_gene_variant
chr1	85113067	T	A	1052	703	0.075391	9	471,175,36,21	MODIFIER	MODIFIER	NONE	NONE	upstream_gene_variant
chr1	85113083	A	C	1194	808	0.085396	2	506,230,47,25	MODIFIER	MODIFIER	NONE	NONE	upstream_gene_variant
chr1	85113155	GGAGT	G	705	722	0.085873	1	285,378,28,34	MODIFIER	MODIFIER	NONE	NONE	upstream_gene_variant
chr1	85113211	T	C	580	356	0.126404	0	0,310,0,46	MODIFIER	MODIFIER	NONE	NONE	upstream_gene_variant
chr1	85113254	C	T	393	252	0.126984	0	0,219,0,33	MODIFIER	MODIFIER	NONE	NONE	upstream_gene_variant
chr1	85113274	C	T	273	200	0.115	0	1,176,0,23	MODIFIER	MODIFIER	NONE	NONE	upstream_gene_variant
chr1	85113326	G	A	148	98	0.122449	0	2,84,0,12	MODIFIER	MODIFIER	NONE	NONE	upstream_gene_variant
chr1	85115161	G	A	173	43	0.162791	0	35,1,7,0	MODIFIER	NONE	intergenic_region	A530032D15Rik-Gm7609	n.85115161G>A
chr1	85115210	T	C	1143	50	0.68	0	15,0,34,1	MODIFIER	NONE	intergenic_region	A530032D15Rik-Gm7609	n.85115210T>C
chr1	85115420	A	G	861	146	0.253425	27	71,38,13,24	MODIFIER	NONE	intergenic_region	A530032D15Rik-Gm7609	n.85115420A>G
chr1	85115440	A	G	904	163	0.239264	27	75,48,13,27	MODIFIER	NONE	intergenic_region	A530032D15Rik-Gm7609	n.85115440A>G
chr1	85115519	G	A	468	101	0.207921	22	21,58,0,21	MODIFIER	NONE	intergenic_region	A530032D15Rik-Gm7609	n.85115519G>A
chr1	85117096	C	G	198	50	0.2	0	39,0,11,0	MODIFIER	NONE	intergenic_region	A530032D15Rik-Gm7609	n.85117096C>G
chr1	85117209	G	A	768	155	0.212903	14	79,42,28,5	MODIFIER	NONE	intergenic_region	A530032D15Rik-Gm7609	n.85117209G>A
chr1	85117243	G	A	276	209	0.076555	3	91,101,10,7	MODIFIER	NONE	intergenic_region	A530032D15Rik-Gm7609	n.85117243G>A
chr1	85117313	G	GTC	524	133	0.165414	0	17,97,3,19	MODIFIER	NONE	intergenic_region	A530032D15Rik-Gm7609	n.85117313_85117314insTC
chr1	85117335	G	C	240	84	0.214286	6	2,63,2,16	MODIFIER	NONE	intergenic_region	A530032D15Rik-Gm7609	n.85117335G>C
chr1	85117349	G	C	131	36	0.25	0	2,21,1,8	MODIFIER	NONE	intergenic_region	A530032D15Rik-Gm7609	n.85117349G>C
chr1	85117373	TG	T	107	24	0.166667	0	0,21,0,4	MODIFIER	NONE	intergenic_region	A530032D15Rik-Gm7609	n.85117374delG
chr1	85122899	T	C	214	23	0.434783	0	13,0,10,0	MODIFIER	NONE	intergenic_region	A530032D15Rik-Gm7609	n.85122899T>C
chr1	85122973	G	T	201	22	0.545455	1	5,5,8,4	MODIFIER	NONE	intergenic_region	A530032D15Rik-Gm7609	n.85122973G>T
chr1	85123068	G	A	199	23	0.478261	0	0,12,0,11	MODIFIER	NONE	intergenic_region	A530032D15Rik-Gm7609	n.85123068G>A
chr1	85157624	A	C	91	110	0.045455	20	40,65,5,0	MODIFIER	NONE	intergenic_region	A530032D15Rik-Gm7609	n.85157624A>C
chr1	85160720	T	C	103	17	0.352941	0	11,0,6,0	MODIFIER	NONE	intergenic_region	A530032D15Rik-Gm7609	n.85160720T>C
chr1	85164010	C	A	88	101	0.079208	9	29,64,0,8	MODIFIER	NONE	intergenic_region	A530032D15Rik-Gm7609	n.85164010C>A
chr1	85164054	C	T	182	74	0.175676	1	9,50,1,14	MODIFIER	NONE	intergenic_region	A530032D15Rik-Gm7609	n.85164054C>T
chr1	85180407	C	G	103	45	0.177778	0	34,3,8,0	MODIFIER	NONE	intergenic_region	A530032D15Rik-Gm7609	n.85180407C>G
chr1	85180481	GA	G	195	100	0.16	9	71,14,16,0	MODIFIER	NONE	intergenic_region	A530032D15Rik-Gm7609	n.85180482delA
chr1	85180481	G	T	129	101	0.118812	6	75,14,12,0	MODIFIER	NONE	intergenic_region	A530032D15Rik-Gm7609	n.85180481G>T
chr1	85180506	T	A	184	125	0.128	9	92,17,16,0	MODIFIER	NONE	intergenic_region	A530032D15Rik-Gm7609	n.85180506T>A
chr1	85180519	C	T	151	135	0.103704	0	99,22,12,2	MODIFIER	NONE	intergenic_region	A530032D15Rik-Gm7609	n.85180519C>T
chr1	85180525	G	A	389	146	0.19863	0	88,29,23,6	MODIFIER	NONE	intergenic_region	A530032D15Rik-Gm7609	n.85180525G>A
chr1	85180539	C	A	188	176	0.102273	6	84,73,13,6	MODIFIER	NONE	intergenic_region	A530032D15Rik-Gm7609	n.85180539C>A
chr1	85180551	G	A	288	188	0.132979	0	68,90,13,16	MODIFIER	NONE	intergenic_region	A530032D15Rik-Gm7609	n.85180551G>A
chr1	85180555	C	G	379	196	0.158163	0	65,100,13,18	MODIFIER	NONE	intergenic_region	A530032D15Rik-Gm7609	n.85180555C>G
chr1	85180667	T	C	114	29	0.241379	0	0,22,0,7	MODIFIER	NONE	intergenic_region	A530032D15Rik-Gm7609	n.85180667T>C
chr1	85185588	C	A	100	166	0.048193	0	75,83,4,4	MODIFIER	NONE	intergenic_region	A530032D15Rik-Gm7609	n.85185588C>A
chr1	85185592	G	A	154	164	0.067073	28	63,89,11,1	MODIFIER	NONE	intergenic_region	A530032D15Rik-Gm7609	n.85185592G>A
chr1	85185604	A	G	97	169	0.047337	1	62,99,4,4	MODIFIER	NONE	intergenic_region	A530032D15Rik-Gm7609	n.85185604A>G
chr1	85185638	T	C	135	95	0.094737	4	16,70,0,9	MODIFIER	NONE	intergenic_region	A530032D15Rik-Gm7609	n.85185638T>C
chr1	85194143	ATGTT	A	102	56	0.107143	0	43,7,6,0	MODIFIER	NONE	intergenic_region	A530032D15Rik-Gm7609	n.85194144_85194147delTGTT
chr1	85194177	T	G	156	73	0.109589	3	37,28,6,2	MODIFIER	NONE	intergenic_region	A530032D15Rik-Gm7609	n.85194177T>G
chr1	85194181	C	T	135	77	0.090909	3	35,34,5,2	MODIFIER	NONE	intergenic_region	A530032D15Rik-Gm7609	n.85194181C>T
chr1	85194222	GAAGTGTTTGCTATTCAGGA	G	118	83	0.084337	3	27,50,4,3	MODIFIER	NONE	intergenic_region	A530032D15Rik-Gm7609	n.85194223_85194241delAAGTGTTTGCTATTCAGGA
chr1	85194364	G	A	134	17	0.352941	0	1,10,1,5	MODIFIER	NONE	intergenic_region	A530032D15Rik-Gm7609	n.85194364G>A
chr1	85194387	T	G	176	16	0.5	0	1,7,1,7	MODIFIER	NONE	intergenic_region	A530032D15Rik-Gm7609	n.85194387T>G
chr1	85199563	A	G	313	59	0.271186	0	43,0,16,0	MODIFIER	MODIFIER	NONE	NONE	upstream_gene_variant
chr1	85199641	G	T	486	174	0.166667	13	127,17,22,8	LOW	MODIFIER	NONE	NONE	5_prime_UTR_premature_start_codon_gain_variant
chr1	85199709	A	G	450	304	0.092105	13	133,142,8,21	MODIFIER	NONE	5_prime_UTR_variant	Gm7609	c.-400A>G
chr1	85199750	C	T	188	284	0.045775	13	90,180,1,13	MODIFIER	NONE	intron_variant	Gm7609	c.-387+28C>T
chr1	85199821	C	T	1075	88	0.431818	0	1,48,1,38	MODIFIER	NONE	intron_variant	Gm7609	c.-387+99C>T
chr1	85199875	A	G	141	24	0.25	0	0,18,0,6	MODIFIER	NONE	intron_variant	Gm7609	c.-387+153A>G
chr1	85199882	CAG	C	105	18	0.222222	0	0,12,0,4	MODIFIER	NONE	intron_variant	Gm7609	c.-387+161_-387+162delAG
chr1	85202020	T	C	137	25	0.24	0	19,0,6,0	MODIFIER	NONE	intron_variant	Gm7609	c.-386-120T>C
chr1	85244630	G	C	254	14	0.642857	0	3,1,6,4	MODIFIER	MODIFIER	MODIFIER	NONE	NONE
chr1	85246757	C	G	238	15	0.6	0	6,0,9,0	MODIFIER	MODIFIER	NONE	NONE	3_prime_UTR_variant
chr1	85246819	C	T	143	67	0.104478	0	59,1,7,0	MODIFIER	MODIFIER	NONE	NONE	3_prime_UTR_variant
chr1	85246898	C	T	923	228	0.214912	0	156,19,47,6	MODIFIER	MODIFIER	NONE	NONE	3_prime_UTR_variant
chr1	85246950	G	A	536	405	0.096296	5	269,96,26,14	MODERATE	MODERATE	NONE	NONE	missense_variant
chr1	85247114	T	C	467	322	0.093168	2	109,183,9,21	LOW	LOW	NONE	NONE	synonymous_variant
chr1	85247125	G	C	479	289	0.096886	2	92,168,8,21	MODERATE	MODERATE	NONE	NONE	missense_variant
chr1	85247131	G	C	502	281	0.103203	5	87,165,7,22	MODERATE	MODERATE	NONE	NONE	missense_variant
chr1	85247147	A	G	99	256	0.027344	0	71,176,2,6	MODIFIER	MODIFIER	NONE	NONE	intron_variant
chr1	85247282	C	A	421	34	0.470588	0	1,14,1,18	MODIFIER	MODIFIER	NONE	NONE	intron_variant
chr1	85247322	G	A	112	22	0.227273	0	1,16,0,5	MODIFIER	MODIFIER	NONE	NONE	intron_variant
chr1	85254030	T	A	352	76	0.223684	0	53,6,16,1	MODIFIER	MODIFIER	NONE	NONE	intron_variant
chr1	85254186	A	G	121	102	0.078431	11	18,76,4,4	LOW	LOW	NONE	NONE	splice_region_variant&intron_variant
chr1	85254434	C	G	683	137	0.284672	0	92,4,40,1	MODIFIER	MODIFIER	NONE	NONE	intron_variant
chr1	85254630	AG	A	372	315	0.088889	7	28,263,5,23	MODIFIER	MODIFIER	NONE	NONE	intron_variant
chr1	85254641	G	A	453	252	0.126984	3	14,206,3,29	MODIFIER	MODIFIER	NONE	NONE	intron_variant
chr1	85254665	A	G	146	147	0.088435	0	2,132,0,13	MODIFIER	MODIFIER	NONE	NONE	intron_variant
chr1	85254681	A	G	108	86	0.093023	0	0,78,0,8	MODIFIER	MODIFIER	NONE	NONE	intron_variant
chr1	85257271	CGT	C	152	62	0.145161	0	49,2,9,0	MODIFIER	MODIFIER	NONE	NONE	intron_variant
chr1	85257320	T	A	114	105	0.085714	2	85,10,10,0	MODIFIER	MODIFIER	NONE	NONE	intron_variant
chr1	85257337	C	A	161	180	0.077778	1	139,25,13,3	MODIFIER	MODIFIER	NONE	NONE	intron_variant
chr1	85257346	AG	A	248	223	0.09417	2	169,33,19,2	MODIFIER	MODIFIER	NONE	NONE	intron_variant
chr1	85257346	A	T	168	223	0.071749	3	173,34,15,1	MODIFIER	MODIFIER	NONE	NONE	intron_variant
chr1	85257385	C	T	102	394	0.038071	47	305,74,4,11	HIGH	MODIFIER	NONE	NONE	splice_donor_variant&intron_variant
chr1	85257449	G	A	376	392	0.096939	4	128,225,11,28	MODERATE	MODIFIER	NONE	NONE	missense_variant
chr1	85257458	G	A	305	366	0.090164	21	85,248,16,17	MODERATE	MODIFIER	NONE	NONE	missense_variant
chr1	85257513	C	T	110	178	0.078652	0	0,164,0,14	MODIFIER	MODIFIER	NONE	NONE	intron_variant
chr1	85257519	C	T	126	162	0.092593	0	0,147,0,15	MODIFIER	MODIFIER	NONE	NONE	intron_variant
chr1	85257547	T	A	464	90	0.333333	0	1,59,0,30	MODIFIER	MODIFIER	NONE	NONE	intron_variant
chr1	85259628	GAAAA	G	220	105	0.209524	15	51,1,18,4	MODIFIER	MODIFIER	NONE	NONE	intron_variant
chr1	85259628	GAAA	G	128	105	0.142857	14	51,1,12,3	MODIFIER	MODIFIER	NONE	NONE	intron_variant
chr1	85259698	T	A	120	214	0.060748	13	138,60,15,1	MODERATE	MODERATE	NONE	NONE	missense_variant
chr1	85259779	C	T	231	324	0.074074	2	147,152,10,14	MODERATE	MODERATE	NONE	NONE	missense_variant
chr1	85259789	C	A	328	344	0.093023	0	169,142,18,15	MODERATE	MODERATE	NONE	NONE	missense_variant
chr1	85259813	G	A	1021	383	0.190601	2	189,119,49,26	LOW	LOW	NONE	NONE	synonymous_variant
chr1	85259840	C	A	132	320	0.05	7	203,89,14,2	LOW	LOW	NONE	NONE	synonymous_variant
chr1	85259869	T	G	322	269	0.111524	6	151,86,17,15	LOW	LOW	NONE	NONE	splice_region_variant&intron_variant
chr1	85259925	C	G	345	283	0.113074	2	9,240,0,33	MODIFIER	MODIFIER	NONE	NONE	intron_variant
chr1	85259981	C	T	151	200	0.075	0	1,184,0,15	MODIFIER	MODIFIER	NONE	NONE	intron_variant
chr1	85259983	A	T	198	195	0.092308	0	1,175,0,18	MODIFIER	MODIFIER	NONE	NONE	intron_variant
chr1	85269850	G	A	143	93	0.129032	0	81,0,12,0	MODIFIER	MODIFIER	NONE	NONE	intron_variant
chr1	85269865	C	T	215	115	0.147826	0	98,0,17,0	MODIFIER	MODIFIER	NONE	NONE	intron_variant
chr1	85269895	C	A	273	109	0.183486	0	87,1,21,0	MODIFIER	MODIFIER	NONE	NONE	intron_variant
chr1	85269955	C	A	157	54	0.203704	7	19,23,8,3	MODIFIER	MODIFIER	NONE	NONE	intron_variant
chr1	85270052	T	C	126	131	0.091603	34	59,56,0,12	MODERATE	MODERATE	NONE	NONE	missense_variant
chr1	85270115	C	T	203	102	0.156863	19	23,62,0,17	MODIFIER	MODIFIER	NONE	NONE	5_prime_UTR_variant
chr1	85276780	C	T	101	17	0.352941	13	5,6,6,0	MODIFIER	NONE	intergenic_region	C130026I21Rik-Sp110	n.85276780C>T
chr1	85276986	C	T	113	20	0.35	0	1,12,0,7	MODIFIER	NONE	intergenic_region	C130026I21Rik-Sp110	n.85276986C>T
chr1	85279820	C	G	113	35	0.171429	0	28,1,6,0	MODIFIER	NONE	intergenic_region	C130026I21Rik-Sp110	n.85279820C>G
chr1	85281611	A	C	186	251	0.047809	6	43,196,4,8	MODIFIER	NONE	intergenic_region	C130026I21Rik-Sp110	n.85281611A>C
chr1	85281678	C	A	813	73	0.424658	0	1,41,1,30	MODIFIER	NONE	intergenic_region	C130026I21Rik-Sp110	n.85281678C>A
chr1	85282583	C	A	86	41	0.121951	0	36,0,5,0	MODIFIER	NONE	intergenic_region	C130026I21Rik-Sp110	n.85282583C>A
chr1	85282728	G	T	335	160	0.1375	0	125,11,22,2	MODIFIER	NONE	intergenic_region	C130026I21Rik-Sp110	n.85282728G>T
chr1	85284014	C	T	424	166	0.156627	12	73,67,19,7	MODIFIER	NONE	intergenic_region	C130026I21Rik-Sp110	n.85284014C>T
chr1	85284053	C	T	1091	224	0.272321	23	80,79,46,18	MODIFIER	NONE	intergenic_region	C130026I21Rik-Sp110	n.85284053C>T
chr1	85340888	C	T	274	122	0.172131	10	65,36,9,12	MODIFIER	NONE	intergenic_region	C130026I21Rik-Sp110	n.85340888C>T
chr1	85341127	C	A	98	46	0.173913	0	34,3,9,0	MODIFIER	NONE	intergenic_region	C130026I21Rik-Sp110	n.85341127C>A
chr1	85345812	A	G	106	12	0.416667	0	7,0,5,0	MODIFIER	NONE	intergenic_region	C130026I21Rik-Sp110	n.85345812A>G
chr1	85448199	T	C	127	20	0.25	0	15,0,5,0	MODIFIER	NONE	intergenic_region	C130026I21Rik-Sp110	n.85448199T>C
chr1	85448235	C	G	141	70	0.128571	0	60,0,10,0	MODIFIER	NONE	intergenic_region	C130026I21Rik-Sp110	n.85448235C>G
chr1	85448322	A	G	145	322	0.037267	16	210,99,12,0	MODIFIER	NONE	intergenic_region	C130026I21Rik-Sp110	n.85448322A>G
chr1	85448382	G	A	810	329	0.136778	9	130,153,15,31	MODIFIER	NONE	intergenic_region	C130026I21Rik-Sp110	n.85448382G>A
chr1	85448399	T	C	382	292	0.082192	11	87,180,13,12	MODIFIER	NONE	intergenic_region	C130026I21Rik-Sp110	n.85448399T>C
chr1	85448419	G	A	325	228	0.087719	10	49,154,10,15	MODIFIER	NONE	intergenic_region	C130026I21Rik-Sp110	n.85448419G>A
chr1	85448426	CTCTATT	C	302	196	0.086735	0	42,140,4,13	MODIFIER	NONE	intergenic_region	C130026I21Rik-Sp110	n.85448427_85448432delTCTATT
chr1	85448432	T	C	1650	181	0.370166	11	13,81,18,52	MODIFIER	NONE	intergenic_region	C130026I21Rik-Sp110	n.85448432T>C
chr1	85448476	G	C	341	113	0.150442	0	0,92,0,19	MODIFIER	NONE	intergenic_region	C130026I21Rik-Sp110	n.85448476G>C
chr1	85448480	C	G	167	105	0.104762	0	0,92,0,13	MODIFIER	NONE	intergenic_region	C130026I21Rik-Sp110	n.85448480C>G
chr1	85448492	C	G	302	95	0.273684	0	0,63,0,32	MODIFIER	NONE	intergenic_region	C130026I21Rik-Sp110	n.85448492C>G
chr1	85448508	CTCTCTCTCTCTGTGTG	C	254	68	0.205882	0	0,54,0,14	MODIFIER	NONE	intergenic_region	C130026I21Rik-Sp110	n.85448509_85448524delTCTCTCTCTCTGTGTG
chr1	85448518	CTGTGTGTGTG	C	147	53	0.150943	0	0,45,0,8	MODIFIER	NONE	intergenic_region	C130026I21Rik-Sp110	n.85448519_85448528delTGTGTGTGTG
chr1	85448548	TG	T	243	41	0.317073	0	0,28,0,13	MODIFIER	NONE	intergenic_region	C130026I21Rik-Sp110	n.85448549delG
chr1	85448650	A	C	268	10	0.8	0	0,2,0,8	MODIFIER	NONE	intergenic_region	C130026I21Rik-Sp110	n.85448650A>C
chr1	85484143	T	C	162	47	0.234043	0	36,0,11,0	MODIFIER	NONE	intergenic_region	C130026I21Rik-Sp110	n.85484143T>C
chr1	85484357	A	G	381	672	0.071429	30	529,95,48,0	MODIFIER	NONE	intergenic_region	C130026I21Rik-Sp110	n.85484357A>G
chr1	85484456	C	T	290	471	0.076433	0	10,425,0,36	MODIFIER	NONE	intergenic_region	C130026I21Rik-Sp110	n.85484456C>T
chr1	85484791	C	T	284	234	0.115385	6	88,119,15,12	MODIFIER	NONE	intergenic_region	C130026I21Rik-Sp110	n.85484791C>T
chr1	85485034	T	C	180	146	0.109589	12	81,42,16,2	MODIFIER	NONE	intergenic_region	C130026I21Rik-Sp110	n.85485034T>C
chr1	85485103	G	T	411	144	0.180556	2	61,57,11,15	MODIFIER	NONE	intergenic_region	C130026I21Rik-Sp110	n.85485103G>T
chr1	85485181	A	G	207	157	0.10828	15	29,111,8,9	MODIFIER	NONE	intergenic_region	C130026I21Rik-Sp110	n.85485181A>G
chr1	85485245	G	T	194	89	0.168539	0	3,71,0,15	MODIFIER	NONE	intergenic_region	C130026I21Rik-Sp110	n.85485245G>T
chr1	85485270	G	C	133	55	0.181818	0	0,45,0,10	MODIFIER	NONE	intergenic_region	C130026I21Rik-Sp110	n.85485270G>C
chr1	85488275	T	C	260	67	0.223881	1	47,5,13,2	MODIFIER	NONE	intergenic_region	C130026I21Rik-Sp110	n.85488275T>C
chr1	85488475	TAC	T	96	27	0.185185	0	0,23,0,5	MODIFIER	NONE	intergenic_region	C130026I21Rik-Sp110	n.85488476_85488477delAC
chr1	85491141	C	T	425	29	0.517241	0	13,0,16,0	MODIFIER	NONE	intergenic_region	C130026I21Rik-Sp110	n.85491141C>T
chr1	85491229	T	G	1804	140	0.471429	3	72,2,66,0	MODIFIER	NONE	intergenic_region	C130026I21Rik-Sp110	n.85491229T>G
chr1	85491253	T	C	164	168	0.065476	0	155,2,11,0	MODIFIER	NONE	intergenic_region	C130026I21Rik-Sp110	n.85491253T>C
chr1	85491301	C	T	1294	321	0.193146	3	148,109,33,31	MODIFIER	NONE	intergenic_region	C130026I21Rik-Sp110	n.85491301C>T
chr1	85491312	A	G	2769	336	0.330357	0	109,113,56,58	MODIFIER	NONE	intergenic_region	C130026I21Rik-Sp110	n.85491312A>G
chr1	85491344	C	G	1814	318	0.232704	15	80,164,14,60	MODIFIER	NONE	intergenic_region	C130026I21Rik-Sp110	n.85491344C>G
chr1	85491485	A	C	235	30	0.366667	0	0,19,0,11	MODIFIER	NONE	intergenic_region	C130026I21Rik-Sp110	n.85491485A>C
chr1	85491549	C	A	93	17	0.294118	0	2,10,0,5	MODIFIER	NONE	intergenic_region	C130026I21Rik-Sp110	n.85491549C>A
chr1	85500973	T	C	90	48	0.145833	0	41,0,7,0	MODIFIER	NONE	intergenic_region	C130026I21Rik-Sp110	n.85500973T>C
chr1	85501143	G	A	101	148	0.067568	7	91,47,4,6	MODIFIER	NONE	intergenic_region	C130026I21Rik-Sp110	n.85501143G>A
chr1	85512748	T	G	98	62	0.096774	2	50,6,5,1	MODIFIER	NONE	intergenic_region	C130026I21Rik-Sp110	n.85512748T>G
chr1	85513054	T	C	175	99	0.121212	17	56,31,12,0	MODIFIER	NONE	intergenic_region	C130026I21Rik-Sp110	n.85513054T>C
chr1	85513131	G	A	172	199	0.070352	20	106,78,13,1	MODIFIER	NONE	intergenic_region	C130026I21Rik-Sp110	n.85513131G>A
chr1	85513171	A	T	1441	184	0.375	1	53,62,34,35	MODIFIER	NONE	intergenic_region	C130026I21Rik-Sp110	n.85513171A>T
chr1	85513250	C	T	293	66	0.257576	5	0,49,1,16	MODIFIER	NONE	intergenic_region	C130026I21Rik-Sp110	n.85513250C>T
chr1	85513254	C	A	260	64	0.25	6	0,48,1,15	MODIFIER	NONE	intergenic_region	C130026I21Rik-Sp110	n.85513254C>A
chr1	85513347	C	T	107	16	0.375	0	0,9,0,7	MODIFIER	NONE	intergenic_region	C130026I21Rik-Sp110	n.85513347C>T
chr1	85513373	A	G	129	11	0.545455	0	0,5,0,6	MODIFIER	NONE	intergenic_region	C130026I21Rik-Sp110	n.85513373A>G
chr1	85513399	C	T	138	11	0.545455	0	0,5,0,6	MODIFIER	NONE	intergenic_region	C130026I21Rik-Sp110	n.85513399C>T
chr1	85514488	G	GT	133	65	0.169231	5	39,15,10,1	MODIFIER	NONE	intergenic_region	C130026I21Rik-Sp110	n.85514488_85514489insT
chr1	85514488	GT	G	332	65	0.338462	1	33,9,16,6	MODIFIER	NONE	intergenic_region	C130026I21Rik-Sp110	n.85514489delT
chr1	85526716	A	G	718	145	0.234483	42	50,56,32,6	MODIFIER	NONE	intergenic_region	C130026I21Rik-Sp110	n.85526716A>G
chr1	85526807	C	T	87	94	0.074468	14	13,73,4,4	MODIFIER	NONE	intergenic_region	C130026I21Rik-Sp110	n.85526807C>T
chr1	85526883	CAGACAG	C	72	26	0.153846	0	0,23,0,4	MODIFIER	NONE	intergenic_region	C130026I21Rik-Sp110	n.85526884_85526889delAGACAG
chr1	85549612	T	C	103	55	0.145455	0	45,1,9,0	MODIFIER	NONE	intergenic_region	C130026I21Rik-Sp110	n.85549612T>C
chr1	85549648	T	C	792	144	0.368056	15	76,14,52,2	MODIFIER	NONE	intergenic_region	C130026I21Rik-Sp110	n.85549648T>C
chr1	85549714	G	T	146	229	0.082969	2	160,50,16,3	MODIFIER	NONE	intergenic_region	C130026I21Rik-Sp110	n.85549714G>T
chr1	85549728	G	A	263	195	0.138462	16	113,55,24,3	MODIFIER	NONE	intergenic_region	C130026I21Rik-Sp110	n.85549728G>A
chr1	85549768	G	T	95	152	0.078947	0	55,83,5,8	MODIFIER	NONE	intergenic_region	C130026I21Rik-Sp110	n.85549768G>T
chr1	85550343	C	T	235	321	0.062305	3	193,106,16,6	MODIFIER	NONE	intergenic_region	C130026I21Rik-Sp110	n.85550343C>T
chr1	85550564	A	G	267	170	0.135294	23	111,36,23,0	MODIFIER	NONE	intergenic_region	C130026I21Rik-Sp110	n.85550564A>G
chr1	85550686	A	G	273	142	0.161972	0	1,118,0,23	MODIFIER	NONE	intergenic_region	C130026I21Rik-Sp110	n.85550686A>G
chr1	85577204	T	G	129	77	0.090909	0	60,5,9,0	MODIFIER	MODIFIER	NONE	NONE	3_prime_UTR_variant
chr1	85577220	G	C	122	105	0.07619	6	76,15,8,4	MODIFIER	MODIFIER	NONE	NONE	3_prime_UTR_variant
chr1	85577222	GAC	G	211	106	0.113208	6	78,17,8,4	MODIFIER	MODIFIER	NONE	NONE	3_prime_UTR_variant
chr1	85577249	C	T	499	167	0.137725	17	97,41,13,16	MODIFIER	MODIFIER	NONE	NONE	3_prime_UTR_variant
chr1	85577269	A	G	552	202	0.128713	14	106,69,10,17	MODIFIER	MODIFIER	NONE	NONE	3_prime_UTR_variant
chr1	85577329	A	C	125	167	0.041916	12	59,101,0,7	MODERATE	MODERATE	NONE	NONE	missense_variant
chr1	85579079	T	G	276	314	0.066879	4	131,162,7,14	MODERATE	MODERATE	NONE	NONE	missense_variant
chr1	85579092	G	A	224	312	0.057692	4	118,176,5,13	MODERATE	MODERATE	NONE	NONE	missense_variant
chr1	85579128	C	T	235	270	0.062963	2	69,184,3,14	MODERATE	MODERATE	NONE	NONE	missense_variant
chr1	85579153	A	T	442	209	0.129187	21	50,132,1,26	LOW	LOW	NONE	NONE	synonymous_variant
chr1	85586187	G	A	143	239	0.054393	20	146,79,4,10	MODIFIER	MODIFIER	NONE	NONE	intron_variant
chr1	85586197	C	T	197	272	0.0625	30	139,116,16,1	MODIFIER	MODIFIER	NONE	NONE	intron_variant
chr1	85588969	C	A	174	92	0.173913	0	61,0,16,0	MODIFIER	MODIFIER	NONE	NONE	intron_variant
chr1	85588969	C	T	144	92	0.152174	0	61,0,14,0	MODIFIER	MODIFIER	NONE	NONE	intron_variant
chr1	85589100	C	A	367	222	0.153153	3	86,101,19,16	MODIFIER	MODIFIER	NONE	NONE	intron_variant
chr1	85589118	C	G	397	206	0.165049	19	52,119,19,16	MODERATE	MODERATE	NONE	NONE	missense_variant
chr1	85589148	T	A	384	215	0.15814	29	43,136,19,17	LOW	LOW	NONE	NONE	synonymous_variant
chr1	85589192	C	A	189	167	0.101796	13	30,120,0,17	HIGH	HIGH	NONE	NONE	splice_acceptor_variant&intron_variant
chr1	85591825	C	T	345	36	0.388889	8	4,18,0,14	MODIFIER	MODIFIER	NONE	NONE	intron_variant
chr1	85600893	C	A	140	14	0.357143	4	8,0,4,1	MODIFIER	MODIFIER	MODIFIER	NONE	NONE
chr1	85600938	G	A	433	29	0.517241	0	14,0,15,0	MODIFIER	MODIFIER	MODIFIER	NONE	NONE
chr1	85601172	T	G	184	815	0.020859	17	441,355,16,3	MODERATE	MODIFIER	MODIFIER	NONE	NONE
chr1	85601206	C	T	897	823	0.076549	17	324,436,37,26	MODIFIER	MODIFIER	MODIFIER	NONE	NONE
chr1	85601210	T	A	12257	813	0.570726	18	158171189293	MODIFIER	MODIFIER	MODIFIER	NONE	NONE
chr1	85601257	C	A	477	528	0.07197	0	113,376,8,30	MODIFIER	MODIFIER	MODIFIER	NONE	NONE
chr1	85601266	T	A	192	464	0.040948	18	80,365,8,11	MODIFIER	MODIFIER	MODIFIER	NONE	NONE
chr1	85601338	C	T	129	182	0.06044	0	2,169,0,11	MODIFIER	MODIFIER	MODIFIER	NONE	NONE
chr1	85601352	C	T	150	147	0.081633	0	0,135,0,12	MODIFIER	MODIFIER	MODIFIER	NONE	NONE
chr1	85601359	G	A	187	133	0.105263	0	0,118,0,15	MODIFIER	MODIFIER	MODIFIER	NONE	NONE
chr1	85601372	G	C	89	110	0.072727	0	0,100,0,8	MODIFIER	MODIFIER	MODIFIER	NONE	NONE
chr1	85601412	G	T	526	46	0.521739	0	0,21,0,25	MODIFIER	MODIFIER	MODIFIER	NONE	NONE
chr1	85610636	A	T	606	114	0.324561	0	76,0,38,0	MODIFIER	NONE	intron_variant	Sp140	c.196-103A>T
chr1	85610664	T	C	177	274	0.076642	0	251,1,21,0	MODIFIER	NONE	intron_variant	Sp140	c.196-75T>C
chr1	85610672	G	C	212	343	0.075802	0	314,3,26,0	MODIFIER	NONE	intron_variant	Sp140	c.196-67G>C
chr1	85610733	T	A	1912	1081	0.150786	3	608,306,115,50	LOW	NONE	splice_region_variant&intron_variant	Sp140	c.196-6T>A
chr1	85610753	A	C	635	1274	0.06044	6	672,519,40,41	LOW	NONE	synonymous_variant	Sp140	c.210A>C
chr1	85610774	GGA	G	399	1372	0.040816	12	627,703,19,37	HIGH	NONE	frameshift_variant	Sp140	c.237_238delAG
chr1	85610791	A	G	729	1330	0.060902	16	520,727,24,59	MODERATE	NONE	missense_variant	Sp140	c.248A>G
chr1	85610808	CAGA	C	1218	1120	0.099107	63	349,686,65,46	MODERATE	NONE	conservative_inframe_deletion	Sp140	c.271_273delAAG
chr1	85610828	T	A	1761	832	0.161058	23	217,477,61,77	MODERATE	NONE	missense_variant	Sp140	c.285T>A
chr1	85610834	G	T	223	754	0.041114	7	242,479,7,25	LOW	NONE	synonymous_variant	Sp140	c.291G>T
chr1	85610920	G	C	1515	217	0.410138	1	28,93,20,76	MODIFIER	NONE	intron_variant	Sp140	c.367+10G>C
chr1	85610928	C	A	1282	201	0.383085	1	24,90,16,71	MODIFIER	NONE	intron_variant	Sp140	c.367+18C>A
chr1	85614934	G	A	89	70	0.071429	39	8,57,5,0	MODIFIER	NONE	intron_variant	Sp140	c.418+80G>A
chr1	85615064	A	C	580	49	0.44898	25	15,12,21,1	MODIFIER	NONE	intron_variant	Sp140	c.419-124A>C
chr1	85615094	C	A	449	49	0.326531	1	26,7,14,2	MODIFIER	NONE	intron_variant	Sp140	c.419-94C>A
chr1	85615204	T	C	2745	270	0.351852	0	97,76,55,42	LOW	NONE	synonymous_variant	Sp140	c.435T>C
chr1	85615212	C	G	3045	280	0.375	0	94,78,57,50	MODERATE	NONE	missense_variant	Sp140	c.443C>G
chr1	85615280	G	T	2051	192	0.375	1	37,81,21,53	MODIFIER	NONE	intron_variant	Sp140	c.502+9G>T
chr1	85615292	G	A	1628	160	0.375	4	28,71,13,48	MODIFIER	NONE	intron_variant	Sp140	c.502+21G>A
chr1	85615314	T	C	595	88	0.261364	17	14,51,0,23	MODIFIER	NONE	intron_variant	Sp140	c.502+43T>C
chr1	85615316	G	A	557	87	0.252874	17	14,51,0,22	MODIFIER	NONE	intron_variant	Sp140	c.502+45G>A
chr1	85615339	C	T	280	55	0.2	0	3,41,0,11	MODIFIER	NONE	intron_variant	Sp140	c.502+68C>T
chr1	85615442	A	C	173	20	0.3	0	0,14,0,6	MODIFIER	NONE	intron_variant	Sp140	c.502+171A>C
chr1	85619965	T	A	145	43	0.162791	0	36,0,7,0	MODIFIER	NONE	intron_variant	Sp140	c.503-91T>A
chr1	85620099	A	G	90	136	0.044118	20	73,57,0,6	MODERATE	NONE	missense_variant	Sp140	c.546A>G
chr1	85621644	C	T	4015	321	0.58567	1	79,52,110,80	MODIFIER	NONE	intron_variant	Sp140	c.605-10C>T
chr1	85621656	T	G	90	317	0.0347	2	157,148,7,4	MODERATE	NONE	missense_variant&splice_region_variant	Sp140	c.607T>G
chr1	85621722	G	A	169	205	0.078049	0	20,169,1,15	MODIFIER	NONE	intron_variant	Sp140	c.658+15G>A
chr1	85635589	C	A	173	164	0.073171	4	92,60,9,3	MODERATE	NONE	missense_variant	Sp140	c.1003C>A
chr1	85635605	A	G	190	170	0.076471	5	75,80,9,5	MODERATE	NONE	missense_variant&splice_region_variant	Sp140	c.1019A>G
chr1	85635618	C	T	210	157	0.089172	2	59,84,7,7	MODIFIER	NONE	intron_variant	Sp140	c.1020+12C>T
chr1	85635624	C	G	1111	148	0.337838	2	30,62,21,34	MODIFIER	NONE	intron_variant	Sp140	c.1020+18C>G
chr1	85635628	T	G	1111	146	0.342466	2	25,66,18,37	MODIFIER	NONE	intron_variant	Sp140	c.1020+22T>G
chr1	85642692	G	T	125	38	0.236842	2	4,25,0,9	MODIFIER	NONE	intron_variant	Sp140	c.1284+45G>T
chr1	85642854	T	C	128	51	0.176471	4	35,7,6,3	MODIFIER	NONE	intron_variant	Sp140	c.1285-81T>C
chr1	85643220	G	A	184	123	0.089431	20	59,53,1,10	LOW	NONE	synonymous_variant	Sp140	c.1380G>A
chr1	85643221	A	G	186	122	0.090164	20	57,54,1,10	MODERATE	NONE	missense_variant	Sp140	c.1381A>G
chr1	85644424	G	T	198	18	0.388889	0	11,0,7,0	MODIFIER	NONE	intron_variant	Sp140	c.1507-160G>T
chr1	85644523	G	C	861	94	0.329787	2	59,3,32,0	MODIFIER	NONE	intron_variant	Sp140	c.1507-61G>C
chr1	85644566	A	ATGT	115	157	0.082803	8	104,23,13,0	MODIFIER	NONE	intron_variant	Sp140	c.1507-18_1507-17insTGT
chr1	85644566	AT	A	209	157	0.127389	5	112,22,19,1	MODIFIER	NONE	intron_variant	Sp140	c.1507-17delT
chr1	85644685	A	G	479	144	0.152778	1	22,98,3,21	MODIFIER	NONE	3_prime_UTR_variant	Sp140	c.*3A>G
chr1	85644724	T	G	196	82	0.109756	0	3,69,0,10	MODIFIER	NONE	3_prime_UTR_variant	Sp140	c.*42T>G
chr1	85649959	C	T	225	37	0.243243	0	28,0,9,0	MODIFIER	MODIFIER	MODIFIER	MODIFIER	MODIFIER
chr1	85650046	G	T	88	128	0.039062	4	91,32,5,0	LOW	LOW	LOW	LOW	MODIFIER
chr1	85650053	T	C	177	137	0.072993	12	89,38,10,0	MODIFIER	MODIFIER	MODIFIER	MODIFIER	NONE
chr1	85650131	A	G	1171	206	0.247573	3	63,89,26,28	LOW	LOW	LOW	LOW	NONE
chr1	85650213	T	C	346	86	0.174419	0	5,66,1,14	MODIFIER	MODIFIER	MODIFIER	MODIFIER	NONE
chr1	85650219	C	T	285	76	0.157895	0	4,60,0,12	MODIFIER	MODIFIER	MODIFIER	MODIFIER	NONE
chr1	85659570	T	A	91	37	0.162162	0	30,1,6,0	MODIFIER	MODIFIER	MODIFIER	MODIFIER	NONE
chr1	85905368	G	T	569	74	0.283784	7	17,35,11,10	MODERATE	NONE	missense_variant	Itm2c	c.422G>T
chr1	86351591	A	T	558	50	0.5	0	3,21,3,23	MODIFIER	MODIFIER	MODIFIER	MODIFIER	NONE
chr1	86353947	TA	T	75	27	0.185185	0	1,22,0,5	MODIFIER	MODIFIER	MODIFIER	MODIFIER	NONE
chr1	86427117	A	G	568	60	0.333333	1	14,26,8,12	LOW	NONE	synonymous_variant	1700019O17Rik	c.747A>G
chr1	86973430	G	T	1501	183	0.306011	4	70,56,36,20	HIGH	HIGH	NONE	NONE	stop_gained
chr1	87125920	C	T	1082	122	0.311475	4	28,55,17,22	LOW	NONE	synonymous_variant	Akp3	c.516C>T
chr1	87151602	AC	A	136	17	0.411765	3	2,8,0,7	MODIFIER	MODIFIER	NONE	NONE	intron_variant
chr1	87297829	C	A	240	21	0.380952	2	2,11,2,6	MODIFIER	NONE	intron_variant	Efhd1	c.588+66C>A
chr1	87374048	CGAG	C	77	116	0.025862	0	65,49,2,1	MODERATE	MODERATE	NONE	NONE	conservative_inframe_deletion
chr1	87386270	CT	C	96	32	0.1875	0	26,0,6,0	MODIFIER	MODIFIER	MODIFIER	NONE	NONE
chr1	87420259	CT	C	132	186	0.075269	2	155,16,12,2	MODIFIER	MODIFIER	NONE	NONE	intron_variant
chr1	87584360	GC	G	798	22	0.909091	0	0,2,3,17	MODIFIER	MODIFIER	MODIFIER	NONE	NONE
chr1	87715330	T	TTG	1111	177	0.19209	12	64,79,9,25	MODIFIER	MODIFIER	MODIFIER	MODIFIER	NONE
chr1	87840700	CTG	C	98	22	0.136364	6	19,1,2,1	MODIFIER	NONE	intron_variant	Sag	c.1038-91_1038-90delTG
chr1	87844020	TTAAA	T	281	29	0.275862	0	21,0,8,0	MODIFIER	NONE	intron_variant	Sag	c.1094-91_1094-88delTAAA
chr1	87881995	G	A	302	45	0.244444	5	5,29,0,11	MODIFIER	NONE	intron_variant	Dgkd	c.348+56G>A
chr1	87916529	GC	G	181	35	0.314286	5	4,20,0,11	MODIFIER	NONE	intron_variant	Dgkd	c.693+55delC
chr1	87959679	AT	A	70	41	0.146341	0	34,0,6,0	MODIFIER	MODIFIER	NONE	NONE	intron_variant
chr1	88056440	G	GT	93	35	0.171429	0	1,28,0,6	MODIFIER	NONE	intron_variant	Ugt1a10	c.855+104_855+105insT
chr1	88107175	C	T	144	249	0.032129	1	117,122,5,4	LOW	MODIFIER	MODIFIER	MODIFIER	NONE
chr1	88166739	G	T	1775	221	0.285068	1	67,89,30,35	MODERATE	MODIFIER	MODIFIER	MODIFIER	MODIFIER
chr1	88211842	C	T	211	39	0.205128	0	31,0,8,0	MODIFIER	MODIFIER	MODIFIER	MODIFIER	MODIFIER
chr1	88211867	C	T	410	56	0.25	0	42,0,14,0	MODIFIER	MODIFIER	MODIFIER	MODIFIER	MODIFIER
chr1	88211871	G	A	430	61	0.245902	0	46,0,15,0	MODIFIER	MODIFIER	MODIFIER	MODIFIER	MODIFIER
chr1	88211898	G	A	2873	96	0.84375	0	15,0,81,0	MODIFIER	MODIFIER	MODIFIER	MODIFIER	MODIFIER
chr1	88211915	A	G	510	131	0.152672	2	105,6,20,0	MODIFIER	MODIFIER	MODIFIER	MODIFIER	MODIFIER
chr1	88211922	A	C	2008	146	0.445205	8	78,2,60,6	MODIFIER	MODIFIER	MODIFIER	MODIFIER	MODIFIER
chr1	88211945	G	A	6164	198	0.858586	4	18,5,152,23	MODIFIER	MODIFIER	MODIFIER	MODIFIER	MODIFIER
chr1	88211967	T	G	746	274	0.120438	2	183,56,25,10	MODIFIER	MODIFIER	MODIFIER	MODIFIER	MODIFIER
chr1	88211984	CAG	C	8806	312	0.727564	5	64,22,154,73	MODIFIER	MODIFIER	MODIFIER	MODIFIER	MODIFIER
chr1	88212021	G	A	2273	373	0.230563	0	148,122,54,48	MODERATE	MODIFIER	MODIFIER	MODIFIER	MODIFIER
chr1	88212084	A	T	2860	346	0.294798	0	115,122,55,54	MODERATE	MODIFIER	MODIFIER	MODIFIER	MODIFIER
chr1	88212093	G	A	10046	347	0.835735	1	27,23,150,147	MODERATE	MODIFIER	MODIFIER	MODIFIER	MODIFIER
chr1	88212136	G	A	1216	372	0.137097	0	199,119,34,20	MODERATE	MODIFIER	MODIFIER	MODIFIER	MODIFIER
chr1	88212141	G	T	10279	378	0.791005	4	38,28,200,112	MODERATE	MODIFIER	MODIFIER	MODIFIER	MODIFIER
chr1	88212244	C	T	6527	841	0.280618	0	316282130113	LOW	MODIFIER	MODIFIER	MODIFIER	MODIFIER
chr1	88212297	G	A	2568	795	0.132075	0	294,395,44,62	MODERATE	MODIFIER	MODIFIER	MODIFIER	MODIFIER
chr1	88212317	T	C	19616	706	0.803116	0	49,78,220,359	MODERATE	MODIFIER	MODIFIER	MODIFIER	MODIFIER
chr1	88212321	T	G	2240	690	0.134783	3	218,377,39,56	MODERATE	MODIFIER	MODIFIER	MODIFIER	MODIFIER
chr1	88212331	C	T	3750	629	0.228935	1	183,292,55,98	LOW	MODIFIER	MODIFIER	MODIFIER	MODIFIER
chr1	88212371	AT	A	3605	496	0.233871	0	168,219,49,67	HIGH	MODIFIER	MODIFIER	MODIFIER	MODIFIER
chr1	88212381	C	T	1790	495	0.145455	2	193,229,31,42	MODERATE	MODIFIER	MODIFIER	MODIFIER	MODIFIER
chr1	88212382	T	A	3457	491	0.258656	2	161,198,63,69	LOW	MODIFIER	MODIFIER	MODIFIER	MODIFIER
chr1	88212392	C	T	12641	485	0.773196	0	47,48,186,204	MODERATE	MODIFIER	MODIFIER	MODIFIER	MODIFIER
chr1	88212409	C	T	13588	480	0.804167	0	44,45,198,193	LOW	MODIFIER	MODIFIER	MODIFIER	MODIFIER
chr1	88212452	C	A	3266	513	0.239766	2	204,181,71,55	MODERATE	MODIFIER	MODIFIER	MODIFIER	MODIFIER
chr1	88212465	T	C	4240	517	0.299807	0	196,164,85,71	MODERATE	MODIFIER	MODIFIER	MODIFIER	MODIFIER
chr1	88212512	G	C	471	555	0.043243	2	297,231,13,13	MODERATE	MODIFIER	MODIFIER	MODIFIER	MODIFIER
chr1	88212528	A	C	15948	563	0.80817	2	54,38,258,213	MODERATE	MODIFIER	MODIFIER	MODIFIER	MODIFIER
chr1	88212536	T	C	2187	572	0.153846	0	266,213,50,41	MODERATE	MODIFIER	MODIFIER	MODIFIER	MODIFIER
chr1	88212549	C	T	14435	519	0.799615	10	62,37,223,197	MODERATE	MODIFIER	MODIFIER	MODIFIER	MODIFIER
chr1	88212550	A	G	14335	519	0.795761	9	64,38,224,193	LOW	MODIFIER	MODIFIER	MODIFIER	MODIFIER
chr1	88212555	C	T	3291	553	0.22604	5	237,185,66,64	MODERATE	MODIFIER	MODIFIER	MODIFIER	MODIFIER
chr1	88212568	C	T	4412	613	0.262643	0	241,205,92,75	LOW	MODIFIER	MODIFIER	MODIFIER	MODIFIER
chr1	88212637	G	A	6687	650	0.366154	0	192216117125	LOW	MODIFIER	MODIFIER	MODIFIER	MODIFIER
chr1	88212655	C	T	15872	647	0.748068	4	62,82,240,263	LOW	MODIFIER	MODIFIER	MODIFIER	MODIFIER
chr1	88212672	T	G	1875	597	0.132328	2	242,272,42,40	MODERATE	MODIFIER	MODIFIER	MODIFIER	MODIFIER
chr1	88212696	A	T	4468	574	0.280488	1	200,209,78,87	MODERATE	MODIFIER	MODIFIER	MODIFIER	MODIFIER
chr1	88212730	A	G	17504	628	0.789809	0	63,58,269,238	LOW	MODIFIER	MODIFIER	MODIFIER	MODIFIER
chr1	88212740	C	A	17628	649	0.781202	2	65,63,278,242	MODERATE	MODIFIER	MODIFIER	MODIFIER	MODIFIER
chr1	88212746	C	T	1820	645	0.117829	0	298,270,42,35	MODERATE	MODIFIER	MODIFIER	MODIFIER	MODIFIER
chr1	88212778	A	G	2241	678	0.137168	0	306,275,49,47	LOW	MODIFIER	MODIFIER	MODIFIER	MODIFIER
chr1	88212884	G	A	1448	529	0.117202	1	135,321,23,49	MODIFIER	MODIFIER	MODIFIER	MODIFIER	MODIFIER
chr1	88213019	C	T	2198	74	0.824324	0	0,13,0,61	MODIFIER	MODIFIER	MODIFIER	MODIFIER	MODIFIER
chr1	88213057	A	G	309	36	0.305556	0	0,25,0,11	MODIFIER	MODIFIER	MODIFIER	MODIFIER	MODIFIER
chr1	88214783	C	G	148	15	0.333333	0	10,0,5,0	MODIFIER	MODIFIER	MODIFIER	MODIFIER	MODIFIER
chr1	88214884	G	A	124	49	0.102041	0	44,0,5,0	MODIFIER	MODIFIER	MODIFIER	MODIFIER	MODIFIER
chr1	88214947	C	A	846	162	0.191358	2	110,21,28,3	MODIFIER	MODIFIER	MODIFIER	MODIFIER	MODIFIER
chr1	88214987	G	A	10661	360	0.827778	2	39,16,227,78	MODIFIER	MODIFIER	MODIFIER	MODIFIER	MODIFIER
chr1	88215037	A	G	12239	557	0.651706	1	111,69,237,139	LOW	LOW	LOW	LOW	LOW
chr1	88215054	C	T	1362	586	0.100683	4	307,217,40,21	MODERATE	MODERATE	MODERATE	MODERATE	MODERATE
chr1	88215088	T	G	14098	515	0.796117	3	48,44,200,223	LOW	LOW	LOW	LOW	LOW
chr1	88215123	C	T	1217	425	0.122353	0	142,230,21,32	MODERATE	MODERATE	MODERATE	MODERATE	MODERATE
chr1	88215174	C	T	1372	291	0.178694	0	63,176,14,38	MODERATE	MODERATE	MODERATE	MODERATE	MODERATE
chr1	88215178	A	T	2267	282	0.29078	1	51,148,23,60	LOW	LOW	LOW	LOW	LOW
chr1	88215188	T	G	1902	263	0.262357	0	49,142,18,54	MODIFIER	MODIFIER	MODIFIER	MODIFIER	MODIFIER
chr1	88215198	C	T	1480	238	0.231092	0	43,140,12,43	MODIFIER	MODIFIER	MODIFIER	MODIFIER	MODIFIER
chr1	88215217	A	T	5087	201	0.756219	4	10,37,23,131	MODIFIER	MODIFIER	MODIFIER	MODIFIER	MODIFIER
chr1	88215233	C	T	4564	172	0.755814	2	5,35,12,120	MODIFIER	MODIFIER	MODIFIER	MODIFIER	MODIFIER
chr1	88215275	GTTGTTA	G	1648	99	0.585859	0	0,41,0,58	MODIFIER	MODIFIER	MODIFIER	MODIFIER	MODIFIER
chr1	88215288	T	C	122	83	0.096386	0	0,75,0,8	MODIFIER	MODIFIER	MODIFIER	MODIFIER	MODIFIER
chr1	88215295	TATTAGC	T	203	75	0.24	0	0,57,0,18	MODIFIER	MODIFIER	MODIFIER	MODIFIER	MODIFIER
chr1	88215316	C	T	267	44	0.454545	0	0,7,0,20	MODIFIER	MODIFIER	MODIFIER	MODIFIER	MODIFIER
chr1	88215383	C	A	164	12	0.416667	0	0,6,0,6	MODIFIER	MODIFIER	MODIFIER	MODIFIER	MODIFIER
chr1	88215598	C	G	104	24	0.166667	5	19,1,3,1	MODIFIER	MODIFIER	MODIFIER	MODIFIER	MODIFIER
chr1	88215606	C	G	114	27	0.148148	0	21,2,4,0	MODIFIER	MODIFIER	MODIFIER	MODIFIER	MODIFIER
chr1	88215651	C	T	542	65	0.292308	2	42,3,20,0	MODIFIER	MODIFIER	MODIFIER	MODIFIER	MODIFIER
chr1	88215728	A	T	842	294	0.119048	13	242,17,29,6	MODIFIER	MODIFIER	MODIFIER	MODIFIER	MODIFIER
chr1	88215739	T	TTA	357	392	0.061224	10	313,42,24,0	MODIFIER	MODIFIER	MODIFIER	MODIFIER	MODIFIER
chr1	88215739	T	TTAA	163	392	0.033163	0	313,42,12,1	MODIFIER	MODIFIER	MODIFIER	MODIFIER	MODIFIER
chr1	88215739	TA	T	746	392	0.112245	5	312,36,37,7	MODIFIER	MODIFIER	MODIFIER	MODIFIER	MODIFIER
chr1	88215740	A	T	3015	406	0.29803	3	212,28,111,11	MODIFIER	MODIFIER	MODIFIER	MODIFIER	MODIFIER
chr1	88215788	C	T	2195	808	0.116337	2	491,218,71,27	LOW	LOW	LOW	LOW	LOW
chr1	88215884	T	A	15230	572	0.774476	5	21,87,113,351	HIGH	HIGH	HIGH	HIGH	HIGH
chr1	88215906	GAAA	G	1784	408	0.60049	26	31,124,22,223	MODIFIER	MODIFIER	MODIFIER	MODIFIER	MODIFIER
chr1	88215906	GA	G	308	408	0.034314	10	31,124,6,8	MODIFIER	MODIFIER	MODIFIER	MODIFIER	MODIFIER
chr1	88215910	A	AGG	1298	337	0.727003	6	13,80,22,223	MODIFIER	MODIFIER	MODIFIER	MODIFIER	MODIFIER
chr1	88215928	TAA	T	4335	292	0.636986	0	14,100,23,163	MODIFIER	MODIFIER	MODIFIER	MODIFIER	MODIFIER
chr1	88215943	A	G	6611	242	0.772727	0	5,43,25,169	MODIFIER	MODIFIER	MODIFIER	MODIFIER	MODIFIER
chr1	88215984	C	T	1210	157	0.286624	3	28,83,8,38	MODIFIER	MODIFIER	MODIFIER	MODIFIER	MODIFIER
chr1	88215985	G	A	411	154	0.116883	4	30,105,6,12	MODIFIER	MODIFIER	MODIFIER	MODIFIER	MODIFIER
chr1	88216116	C	T	1302	219	0.237443	0	105,56,39,19	MODIFIER	MODIFIER	MODIFIER	MODIFIER	MODIFIER
chr1	88216140	C	A	507	253	0.086957	0	135,93,14,11	MODERATE	MODERATE	MODERATE	MODERATE	MODERATE
chr1	88216158	TTCA	T	628	269	0.223048	1	122,89,33,27	MODERATE	MODERATE	MODERATE	MODERATE	MODERATE
chr1	88216159	TCAT	T	77	270	0.081481	5	146,105,10,12	MODERATE	MODERATE	MODERATE	MODERATE	MODERATE
chr1	88216159	T	C	94	273	0.080586	2	111,78,12,12	MODERATE	MODERATE	MODERATE	MODERATE	MODERATE
chr1	88216213	C	T	9378	393	0.707379	2	69,43,164,117	MODERATE	MODERATE	MODERATE	MODERATE	MODERATE
chr1	88216254	G	A	1348	422	0.132701	2	215,146,39,22	MODERATE	MODERATE	MODERATE	MODERATE	MODERATE
chr1	88216260	C	T	1933	437	0.176201	3	210,148,42,36	MODERATE	MODERATE	MODERATE	MODERATE	MODERATE
chr1	88216261	G	A	2476	445	0.21573	8	208,138,51,48	MODERATE	MODERATE	MODERATE	MODERATE	MODERATE
chr1	88216273	G	C	2412	469	0.200426	5	207,165,48,49	MODERATE	MODERATE	MODERATE	MODERATE	MODERATE
chr1	88216393	G	T	1528	173	0.323699	6	16,98,4,55	MODIFIER	MODIFIER	MODIFIER	MODIFIER	MODIFIER
chr1	88216458	AT	A	1948	77	0.714286	0	0,24,0,55	MODIFIER	MODIFIER	MODIFIER	MODIFIER	MODIFIER
chr1	88216474	A	AT	148	65	0.076923	0	0,62,0,5	MODIFIER	MODIFIER	MODIFIER	MODIFIER	MODIFIER
chr1	88216494	G	A	760	46	0.5	0	0,20,0,26	MODIFIER	MODIFIER	MODIFIER	MODIFIER	MODIFIER
chr1	88216495	A	C	847	45	0.555556	0	0,19,0,26	MODIFIER	MODIFIER	MODIFIER	MODIFIER	MODIFIER
chr1	88216544	T	A	619	21	0.857143	0	0,3,0,18	MODIFIER	MODIFIER	MODIFIER	MODIFIER	MODIFIER
chr1	88216566	T	C	161	14	0.357143	0	0,9,0,5	MODIFIER	MODIFIER	MODIFIER	MODIFIER	MODIFIER
chr1	88217941	A	G	364	15	0.733333	0	3,0,12,0	MODIFIER	MODIFIER	MODIFIER	MODIFIER	MODIFIER
chr1	88217971	GCAAAAAAA	G	95	24	0.25	0	18,0,6,0	MODIFIER	MODIFIER	MODIFIER	MODIFIER	MODIFIER
chr1	88217984	G	GA	88	30	0.233333	0	23,0,7,0	MODIFIER	MODIFIER	MODIFIER	MODIFIER	MODIFIER
chr1	88218011	GA	G	601	51	0.529412	0	21,0,27,0	MODIFIER	MODIFIER	MODIFIER	MODIFIER	MODIFIER
chr1	88218078	C	A	956	118	0.288136	1	79,5,33,1	MODIFIER	MODIFIER	MODIFIER	MODIFIER	MODIFIER
chr1	88218089	A	G	3608	137	0.766423	2	25,5,94,13	MODIFIER	MODIFIER	MODIFIER	MODIFIER	MODIFIER
chr1	88218098	C	T	1018	147	0.258503	3	87,20,30,10	MODIFIER	MODIFIER	MODIFIER	MODIFIER	MODIFIER
chr1	88218113	T	G	561	195	0.123077	0	124,47,18,6	MODIFIER	MODIFIER	MODIFIER	MODIFIER	MODIFIER
chr1	88218119	G	T	532	206	0.11165	0	129,54,17,6	LOW	LOW	LOW	LOW	LOW
chr1	88218126	G	C	469	211	0.099526	0	128,62,14,7	HIGH	HIGH	HIGH	HIGH	HIGH
chr1	88218146	C	A	6059	254	0.708661	2	40,26,122,66	MODERATE	MODERATE	MODERATE	MODERATE	MODERATE
chr1	88218240	A	T	2335	432	0.215278	3	202,131,63,34	MODERATE	MODERATE	MODERATE	MODERATE	MODERATE
chr1	88218245	C	T	5756	431	0.452436	1	139,87,123,82	MODERATE	MODERATE	MODERATE	MODERATE	MODERATE
chr1	88218249	C	T	790	429	0.086247	2	232,156,27,14	MODERATE	MODERATE	MODERATE	MODERATE	MODERATE
chr1	88218254	GC	G	1198	436	0.09633	1	239,158,27,15	HIGH	HIGH	HIGH	HIGH	HIGH
chr1	88218279	A	T	2430	469	0.202559	2	198,169,59,43	MODERATE	MODERATE	MODERATE	MODERATE	MODERATE
chr1	88218283	C	G	2467	470	0.204255	3	200,170,58,42	MODERATE	MODERATE	MODERATE	MODERATE	MODERATE
chr1	88218360	G	A	2304	410	0.217073	0	139,176,43,52	MODERATE	MODERATE	MODERATE	MODERATE	MODERATE
chr1	88218388	G	A	2384	407	0.22113	0	130,180,40,57	LOW	LOW	LOW	LOW	LOW
chr1	88218390	G	A	1020	406	0.108374	0	150,206,21,29	MODERATE	MODERATE	MODERATE	MODERATE	MODERATE
chr1	88218471	G	T	671	188	0.138298	2	17,143,4,24	MODIFIER	MODIFIER	MODIFIER	MODIFIER	MODIFIER
chr1	88218538	T	C	237	74	0.135135	0	0,64,0,10	MODIFIER	MODIFIER	MODIFIER	MODIFIER	MODIFIER
chr1	88218553	T	TA	1115	53	0.584906	0	0,23,0,31	MODIFIER	MODIFIER	MODIFIER	MODIFIER	MODIFIER
chr1	88218571	C	A	225	40	0.2	0	0,32,0,8	MODIFIER	MODIFIER	MODIFIER	MODIFIER	MODIFIER
chr1	88218574	T	C	97	39	0.102564	0	0,35,0,4	MODIFIER	MODIFIER	MODIFIER	MODIFIER	MODIFIER
chr1	88224626	A	G	121	21	0.285714	0	15,0,6,0	MODIFIER	MODIFIER	MODIFIER	MODIFIER	MODIFIER
chr1	88224627	G	GA	469	22	0.772727	0	3,0,17,0	MODIFIER	MODIFIER	MODIFIER	MODIFIER	MODIFIER
chr1	88224650	C	A	97	39	0.102564	0	35,0,4,0	MODIFIER	MODIFIER	MODIFIER	MODIFIER	MODIFIER
chr1	88224679	C	T	2299	71	0.901408	0	5,0,63,3	MODIFIER	MODIFIER	MODIFIER	MODIFIER	MODIFIER
chr1	88224713	C	A	260	112	0.098214	3	76,25,10,1	MODIFIER	MODIFIER	MODIFIER	MODIFIER	MODIFIER
chr1	88224714	C	A	263	111	0.099099	3	75,25,10,1	MODIFIER	MODIFIER	MODIFIER	MODIFIER	MODIFIER
chr1	88224733	A	G	172	132	0.060606	3	84,39,5,4	MODIFIER	MODIFIER	MODIFIER	MODIFIER	MODIFIER
chr1	88224766	G	C	256	123	0.089431	2	51,60,4,8	MODIFIER	MODIFIER	MODIFIER	MODIFIER	MODIFIER
chr1	88224808	G	T	2808	94	0.861702	0	2,7,20,65	MODIFIER	MODIFIER	MODIFIER	MODIFIER	MODIFIER
chr1	88224815	G	A	245	89	0.123596	6	15,63,4,7	MODIFIER	MODIFIER	MODIFIER	MODIFIER	MODIFIER
chr1	88224826	C	T	526	78	0.24359	3	12,47,2,17	MODIFIER	MODIFIER	MODIFIER	MODIFIER	MODIFIER
chr1	88224846	C	T	163	69	0.115942	4	10,50,3,6	MODIFIER	MODIFIER	MODIFIER	MODIFIER	MODIFIER
chr1	88224849	TC	T	490	65	0.246154	5	8,42,5,11	MODIFIER	MODIFIER	MODIFIER	MODIFIER	MODIFIER
chr1	88224879	G	A	87	57	0.070175	0	17,36,1,3	MODIFIER	MODIFIER	MODIFIER	MODIFIER	MODIFIER
chr1	88224927	T	A	1512	54	0.814815	6	7,1,28,16	MODIFIER	MODIFIER	MODIFIER	MODIFIER	MODIFIER
chr1	88224929	G	A	244	53	0.169811	0	30,11,7,3	MODIFIER	MODIFIER	MODIFIER	MODIFIER	MODIFIER
chr1	88224983	C	T	469	87	0.195402	7	59,9,14,5	MODIFIER	MODIFIER	MODIFIER	MODIFIER	MODIFIER
chr1	88225005	T	A	744	121	0.22314	12	79,15,18,9	MODIFIER	MODIFIER	NONE	NONE	upstream_gene_variant
chr1	88225021	G	C	171	139	0.057554	0	91,40,6,2	MODIFIER	MODIFIER	NONE	NONE	upstream_gene_variant
chr1	88225025	A	C	391	133	0.120301	12	74,41,16,2	MODIFIER	MODIFIER	NONE	NONE	upstream_gene_variant
chr1	88225036	G	A	416	135	0.125926	0	72,43,12,8	MODIFIER	MODIFIER	NONE	NONE	upstream_gene_variant
chr1	88225040	T	A	166	137	0.058394	0	75,54,5,3	MODIFIER	MODIFIER	NONE	NONE	upstream_gene_variant
chr1	88225045	A	G	1889	139	0.453237	2	39,35,38,27	MODIFIER	MODIFIER	NONE	NONE	upstream_gene_variant
chr1	88225062	C	G	2226	133	0.548872	1	27,29,34,43	MODIFIER	MODIFIER	NONE	NONE	upstream_gene_variant
chr1	88225109	G	A	1875	94	0.617021	11	4,32,1,57	MODIFIER	MODIFIER	NONE	NONE	upstream_gene_variant
chr1	88225130	A	T	314	74	0.162162	0	1,60,0,13	MODIFIER	MODIFIER	NONE	NONE	upstream_gene_variant
chr1	88225146	C	T	1660	60	0.783333	0	0,12,0,48	MODIFIER	MODIFIER	NONE	NONE	upstream_gene_variant
chr1	88225227	C	T	264	15	0.6	0	1,5,2,7	MODIFIER	MODIFIER	NONE	NONE	upstream_gene_variant
chr1	88225229	G	A	268	15	0.6	0	1,5,2,7	MODIFIER	MODIFIER	NONE	NONE	upstream_gene_variant
chr1	88225244	TG	T	123	16	0.25	0	5,7,2,2	MODIFIER	MODIFIER	NONE	NONE	upstream_gene_variant
chr1	88225273	A	C	251	19	0.421053	4	4,7,5,3	MODIFIER	MODIFIER	NONE	NONE	upstream_gene_variant
chr1	88225386	G	A	1809	84	0.678571	0	13,7,43,21	MODIFIER	MODIFIER	NONE	NONE	upstream_gene_variant
chr1	88225402	C	T	2222	86	0.755814	0	11,7,42,26	MODIFIER	MODIFIER	NONE	NONE	upstream_gene_variant
chr1	88225430	A	G	356	99	0.151515	3	34,50,8,7	MODIFIER	MODIFIER	NONE	NONE	upstream_gene_variant
chr1	88227863	G	T	99	21	0.190476	0	17,0,4,0	MODIFIER	NONE	intron_variant	Mroh2a	c.-14-191G>T
chr1	88227897	GA	G	1209	46	0.76087	0	11,0,35,0	MODIFIER	NONE	intron_variant	Mroh2a	c.-14-156delA
chr1	88227917	G	C	2026	72	0.791667	0	14,0,58,0	MODIFIER	NONE	intron_variant	Mroh2a	c.-14-137G>C
chr1	88227935	C	T	2840	98	0.795918	0	19,0,79,0	MODIFIER	NONE	intron_variant	Mroh2a	c.-14-119C>T
chr1	88227969	G	A	2191	190	0.389474	4	115,0,74,1	MODIFIER	NONE	intron_variant	Mroh2a	c.-14-85G>A
chr1	88228000	C	A	1119	322	0.145963	4	253,19,45,5	MODIFIER	NONE	intron_variant	Mroh2a	c.-14-54C>A
chr1	88228001	T	A	9022	335	0.785075	0	57,5,248,25	MODIFIER	NONE	intron_variant	Mroh2a	c.-14-53T>A
chr1	88228196	C	A	526	515	0.050485	0	252,236,14,13	MODIFIER	NONE	intron_variant	Mroh2a	c.80-31C>A
chr1	88228343	G	A	1484	431	0.141531	0	137,231,23,40	MODERATE	NONE	missense_variant	Mroh2a	c.196G>A
chr1	88228380	C	A	1237	364	0.14011	0	119,191,20,33	MODERATE	NONE	missense_variant	Mroh2a	c.233C>A
chr1	88228427	G	A	5449	270	0.633333	1	28,61,53,127	MODIFIER	NONE	intron_variant	Mroh2a	c.261+19G>A
chr1	88228453	A	G	202	192	0.052083	0	40,142,2,8	MODIFIER	NONE	intron_variant	Mroh2a	c.261+45A>G
chr1	88228474	C	T	1437	143	0.342657	0	9,83,4,46	MODIFIER	NONE	intron_variant	Mroh2a	c.261+66C>T
chr1	88228498	G	T	1653	93	0.55914	0	2,39,2,50	MODIFIER	NONE	intron_variant	Mroh2a	c.261+90G>T
chr1	88228503	C	T	356	89	0.157303	2	3,72,1,13	MODIFIER	NONE	intron_variant	Mroh2a	c.261+95C>T
chr1	88228513	G	C	1730	71	0.704225	0	1,20,2,48	MODIFIER	NONE	intron_variant	Mroh2a	c.261+105G>C
chr1	88228514	C	T	1736	71	0.704225	0	1,20,2,48	MODIFIER	NONE	intron_variant	Mroh2a	c.261+106C>T
chr1	88228602	G	A	313	14	0.714286	0	0,4,0,10	MODIFIER	NONE	intron_variant	Mroh2a	c.261+194G>A
chr1	88230158	T	C	194	12	0.5	0	6,0,6,0	MODIFIER	NONE	intron_variant	Mroh2a	c.262-184T>C
chr1	88230254	A	C	1397	58	0.706897	2	15,0,39,4	MODIFIER	NONE	intron_variant	Mroh2a	c.262-88A>C
chr1	88230321	A	C	528	151	0.145695	10	83,43,20,4	MODIFIER	NONE	intron_variant	Mroh2a	c.262-21A>C
chr1	88230368	C	A	3712	211	0.554502	4	49,39,76,47	LOW	NONE	synonymous_variant	Mroh2a	c.288C>A
chr1	88230490	T	C	7494	288	0.763889	0	34,31,118,105	MODIFIER	NONE	intron_variant	Mroh2a	c.393+17T>C
chr1	88230509	G	C	979	281	0.13879	0	117,122,21,21	MODIFIER	NONE	intron_variant	Mroh2a	c.393+36G>C
chr1	88230576	A	G	6032	229	0.764192	4	26,23,110,70	MODIFIER	NONE	intron_variant	Mroh2a	c.394-50A>G
chr1	88230602	C	T	1410	254	0.208661	0	130,65,40,19	MODIFIER	NONE	intron_variant	Mroh2a	c.394-24C>T
chr1	88230637	T	C	7396	320	0.709375	2	51,20,168,81	LOW	NONE	synonymous_variant	Mroh2a	c.405T>C
chr1	88230644	G	A	1970	345	0.22029	1	173,88,57,26	MODERATE	NONE	missense_variant	Mroh2a	c.412G>A
chr1	88230650	G	A	8344	373	0.680965	2	63,24,195,91	MODERATE	NONE	missense_variant	Mroh2a	c.418G>A
chr1	88230667	A	C	10445	415	0.746988	2	61,27,214,113	LOW	NONE	synonymous_variant	Mroh2a	c.435A>C
chr1	88230668	G	A	1738	421	0.168646	1	233,115,47,26	MODERATE	NONE	missense_variant	Mroh2a	c.436G>A
chr1	88230680	C	T	2973	459	0.248366	0	220,122,76,41	HIGH	NONE	stop_gained	Mroh2a	c.448C>T
chr1	88230746	G	A	8009	589	0.441426	6	150161148128	MODERATE	NONE	missense_variant	Mroh2a	c.514G>A
chr1	88230879	T	C	3456	137	0.744526	0	0,27,2,108	MODIFIER	NONE	intron_variant	Mroh2a	c.556+91T>C
chr1	88230888	C	T	1167	125	0.328	0	1,83,0,41	MODIFIER	NONE	intron_variant	Mroh2a	c.556+100C>T
chr1	88230896	T	A	2114	107	0.635514	0	0,23,0,83	MODIFIER	NONE	intron_variant	Mroh2a	c.556+108T>A
chr1	88230916	C	G	848	73	0.383562	0	0,45,0,28	MODIFIER	NONE	intron_variant	Mroh2a	c.556+128C>G
chr1	88230932	A	C	1276	58	0.689655	0	0,12,0,40	MODIFIER	NONE	intron_variant	Mroh2a	c.556+144A>C
chr1	88230932	A	T	109	58	0.103448	0	0,12,0,6	MODIFIER	NONE	intron_variant	Mroh2a	c.556+144A>T
chr1	88230960	G	A	207	35	0.228571	0	0,26,0,8	MODIFIER	NONE	intron_variant	Mroh2a	c.556+172G>A
chr1	88230976	ACTGT	A	472	26	0.5	0	0,13,0,13	MODIFIER	NONE	intron_variant	Mroh2a	c.556+189_556+192delCTGT
chr1	88231995	C	G	409	15	0.8	0	3,0,11,1	MODIFIER	NONE	intron_variant	Mroh2a	c.557-249C>G
chr1	88232020	T	G	388	17	0.647059	0	4,0,12,1	MODIFIER	NONE	intron_variant	Mroh2a	c.557-224T>G
chr1	88232041	T	A	119	30	0.166667	5	24,1,4,1	MODIFIER	NONE	intron_variant	Mroh2a	c.557-203T>A
chr1	88232047	C	T	239	31	0.258065	0	21,2,8,0	MODIFIER	NONE	intron_variant	Mroh2a	c.557-197C>T
chr1	88232086	A	C	700	57	0.403509	2	13,0,21,2	MODIFIER	NONE	intron_variant	Mroh2a	c.557-158A>C
chr1	88232086	A	T	591	57	0.350877	0	13,0,20,1	MODIFIER	NONE	intron_variant	Mroh2a	c.557-158A>T
chr1	88232170	G	A	1659	192	0.307292	4	124,7,55,6	MODIFIER	NONE	intron_variant	Mroh2a	c.557-74G>A
chr1	88232257	GCC	G	2435	508	0.155512	4	252,182,41,38	HIGH	NONE	frameshift_variant	Mroh2a	c.572_573delCC
chr1	88232292	C	T	2089	518	0.160232	1	200,234,36,48	MODERATE	NONE	missense_variant	Mroh2a	c.605C>T
chr1	88232324	C	T	11359	428	0.778037	1	25,50,109,241	MODERATE	NONE	missense_variant	Mroh2a	c.637C>T
chr1	88232353	C	T	1403	328	0.170732	0	54,215,11,48	MODIFIER	NONE	intron_variant	Mroh2a	c.655+11C>T
chr1	88232389	T	G	5706	199	0.824121	1	1,32,11,155	MODIFIER	NONE	intron_variant	Mroh2a	c.655+47T>G
chr1	88232419	A	G	3330	112	0.830357	0	0,19,2,91	MODIFIER	NONE	intron_variant	Mroh2a	c.655+77A>G
chr1	88232424	A	G	467	104	0.173077	4	1,85,1,17	MODIFIER	NONE	intron_variant	Mroh2a	c.655+82A>G
chr1	88232527	CA	C	473	19	0.684211	5	1,5,0,13	MODIFIER	NONE	intron_variant	Mroh2a	c.655+186delA
chr1	88233189	A	G	913	33	0.787879	0	7,0,25,1	MODIFIER	NONE	intron_variant	Mroh2a	c.656-128A>G
chr1	88233303	C	A	4277	192	0.682292	6	46,6,111,29	MODIFIER	NONE	intron_variant	Mroh2a	c.656-14C>A
chr1	88233327	G	A	616	246	0.109756	0	167,50,22,6	LOW	NONE	synonymous_variant	Mroh2a	c.666G>A
chr1	88233330	C	T	661	245	0.114286	0	164,52,22,6	LOW	NONE	synonymous_variant	Mroh2a	c.669C>T
chr1	88233340	G	A	760	266	0.120301	1	173,59,24,10	MODERATE	NONE	missense_variant	Mroh2a	c.679G>A
chr1	88233390	G	A	5279	419	0.420048	0	145,90,112,72	LOW	NONE	synonymous_variant	Mroh2a	c.729G>A
chr1	88233393	G	A	3289	432	0.282407	1	190,118,74,50	LOW	NONE	synonymous_variant	Mroh2a	c.732G>A
chr1	88233417	C	T	12168	521	0.712092	0	75,64,210,172	LOW	NONE	synonymous_variant	Mroh2a	c.756C>T
chr1	88233428	G	A	1848	533	0.140713	2	228,226,42,36	MODERATE	NONE	missense_variant	Mroh2a	c.767G>A
chr1	88233435	C	T	1963	544	0.148897	0	223,238,41,41	LOW	NONE	synonymous_variant	Mroh2a	c.774C>T
chr1	88233442	G	T	3864	541	0.264325	4	188,209,61,83	MODERATE	NONE	missense_variant	Mroh2a	c.781G>T
chr1	88233479	C	A	9746	432	0.680556	0	40,86,97,209	MODIFIER	NONE	intron_variant	Mroh2a	c.807+11C>A
chr1	88233480	A	G	9908	434	0.68894	0	40,86,96,212	MODIFIER	NONE	intron_variant	Mroh2a	c.807+12A>G
chr1	88233526	T	C	1885	213	0.314554	2	11,135,7,60	MODIFIER	NONE	intron_variant	Mroh2a	c.807+58T>C
chr1	88233540	T	C	420	173	0.104046	0	7,146,0,20	MODIFIER	NONE	intron_variant	Mroh2a	c.807+72T>C
chr1	88233547	C	A	3406	148	0.702703	2	0,42,3,103	MODIFIER	NONE	intron_variant	Mroh2a	c.807+79C>A
chr1	88233548	A	G	3278	145	0.675862	2	0,40,3,102	MODIFIER	NONE	intron_variant	Mroh2a	c.807+80A>G
chr1	88233804	A	G	375	32	0.5	0	3,0,15,1	MODIFIER	NONE	intron_variant	Mroh2a	c.808-198A>G
chr1	88233810	G	T	1089	33	0.878788	0	3,0,28,2	MODIFIER	NONE	intron_variant	Mroh2a	c.808-192G>T
chr1	88233817	C	T	1165	37	0.864865	0	4,0,31,2	MODIFIER	NONE	intron_variant	Mroh2a	c.808-185C>T
chr1	88233860	C	T	1615	58	0.793103	0	10,0,47,1	MODIFIER	NONE	intron_variant	Mroh2a	c.808-142C>T
chr1	88233867	T	G	1813	65	0.8	0	10,0,54,1	MODIFIER	NONE	intron_variant	Mroh2a	c.808-135T>G
chr1	88233937	G	A	909	198	0.176768	2	141,21,30,6	MODIFIER	NONE	intron_variant	Mroh2a	c.808-65G>A
chr1	88233989	A	T	1436	367	0.160763	7	190,113,45,18	MODIFIER	NONE	intron_variant	Mroh2a	c.808-13A>T
chr1	88234040	G	C	3250	374	0.312834	13	124,130,45,75	LOW	NONE	synonymous_variant	Mroh2a	c.846G>C
chr1	88234120	G	A	2816	322	0.307453	4	81,137,44,59	MODERATE	NONE	missense_variant	Mroh2a	c.926G>A
chr1	88234128	G	A	713	307	0.100977	1	107,168,11,21	MODERATE	NONE	missense_variant	Mroh2a	c.934G>A
chr1	88234137	G	A	2531	297	0.299663	0	78,129,33,57	MODERATE	NONE	missense_variant	Mroh2a	c.943G>A
chr1	88234200	G	A	2336	98	0.714286	8	2,25,15,56	MODIFIER	NONE	intron_variant	Mroh2a	c.951+55G>A
chr1	88234229	T	A	112	49	0.102041	0	5,39,0,5	MODIFIER	NONE	intron_variant	Mroh2a	c.951+84T>A
chr1	88234269	G	A	555	28	0.642857	0	0,6,0,21	MODIFIER	NONE	intron_variant	Mroh2a	c.951+124G>A
chr1	88234306	C	T	1078	34	0.852941	0	0,4,0,30	MODIFIER	NONE	intron_variant	Mroh2a	c.951+161C>T
chr1	88234312	T	C	1085	35	0.828571	0	0,5,0,30	MODIFIER	NONE	intron_variant	Mroh2a	c.951+167T>C
chr1	88234400	C	T	221	16	0.4375	0	0,9,0,7	MODIFIER	NONE	intron_variant	Mroh2a	c.951+255C>T
chr1	88234415	A	T	403	13	0.846154	0	0,2,0,11	MODIFIER	NONE	intron_variant	Mroh2a	c.951+270A>T
chr1	88234839	C	G	267	100	0.11	0	86,2,12,0	MODIFIER	NONE	intron_variant	Mroh2a	c.952-131C>G
chr1	88234840	T	C	2651	100	0.76	3	22,1,76,1	MODIFIER	NONE	intron_variant	Mroh2a	c.952-130T>C
chr1	88234872	G	A	611	179	0.139665	0	147,6,24,1	MODIFIER	NONE	intron_variant	Mroh2a	c.952-98G>A
chr1	88234936	T	C	12106	471	0.766454	13	75,27,304,65	MODIFIER	NONE	intron_variant	Mroh2a	c.952-34T>C
chr1	88234944	C	G	1853	531	0.143126	1	350,100,61,20	MODIFIER	NONE	intron_variant	Mroh2a	c.952-26C>G
chr1	88234946	G	T	550	554	0.050542	1	406,119,24,5	MODIFIER	NONE	intron_variant	Mroh2a	c.952-24G>T
chr1	88234981	G	A	7209	781	0.332907	4	324,192,176,89	LOW	NONE	synonymous_variant	Mroh2a	c.963G>A
chr1	88234996	G	A	2664	845	0.133728	1	427,298,72,47	LOW	NONE	synonymous_variant	Mroh2a	c.978G>A
chr1	88235023	G	A	23324	890	0.776405	7	89,81,334,386	LOW	NONE	synonymous_variant	Mroh2a	c.1005G>A
chr1	88235051	T	C	19359	744	0.775538	6	61,82,221,380	LOW	NONE	synonymous_variant	Mroh2a	c.1033T>C
chr1	88235079	G	A	14219	567	0.749559	3	33,80,116,337	MODIFIER	NONE	intron_variant	Mroh2a	c.1044+17G>A
chr1	88235098	G	C	12074	467	0.779443	3	19,76,90,282	MODIFIER	NONE	intron_variant	Mroh2a	c.1044+36G>C
chr1	88235114	G	A	4997	386	0.440415	4	57,152,40,135	MODIFIER	NONE	intron_variant	Mroh2a	c.1044+52G>A
chr1	88235127	C	T	1156	324	0.148148	7	80,192,20,32	MODIFIER	NONE	intron_variant	Mroh2a	c.1045-63C>T
chr1	88235143	T	C	2652	335	0.283582	1	93,144,36,62	MODIFIER	NONE	intron_variant	Mroh2a	c.1045-47T>C
chr1	88235176	G	A	1679	365	0.180822	6	162,131,34,38	MODIFIER	NONE	intron_variant	Mroh2a	c.1045-14G>A
chr1	88235184	C	T	1218	385	0.132468	2	180,151,32,22	LOW	NONE	splice_region_variant&intron_variant	Mroh2a	c.1045-6C>T
chr1	88235214	C	T	1335	397	0.13602	6	201,142,27,27	HIGH	NONE	stop_gained	Mroh2a	c.1069C>T
chr1	88235216	G	T	1277	398	0.130653	1	197,146,30,25	MODERATE	NONE	missense_variant	Mroh2a	c.1071G>T
chr1	88235236	T	C	778	412	0.087379	0	205,169,21,17	MODERATE	NONE	missense_variant	Mroh2a	c.1091T>C
chr1	88235254	G	A	3581	404	0.316832	0	142,121,75,66	MODERATE	NONE	missense_variant	Mroh2a	c.1109G>A
chr1	88235376	G	A	2657	638	0.167712	5	296,223,75,44	MODERATE	NONE	missense_variant	Mroh2a	c.1127G>A
chr1	88235442	G	A	16022	614	0.758958	8	42,92,186,294	MODERATE	NONE	missense_variant	Mroh2a	c.1193G>A
chr1	88235449	G	T	2004	591	0.137056	0	178,325,30,57	LOW	NONE	synonymous_variant	Mroh2a	c.1200G>T
chr1	88235629	C	T	709	30	0.7	6	1,6,0,23	MODIFIER	NONE	intron_variant	Mroh2a	c.1237+143C>T
chr1	88236513	AG	A	711	27	0.703704	0	8,0,18,1	MODIFIER	NONE	intron_variant	Mroh2a	c.1238-141delG
chr1	88236521	T	C	874	33	0.757576	0	8,0,24,1	MODIFIER	NONE	intron_variant	Mroh2a	c.1238-134T>C
chr1	88236559	G	A	309	85	0.141176	0	70,1,14,0	MODIFIER	NONE	intron_variant	Mroh2a	c.1238-96G>A
chr1	88236562	C	G	1942	92	0.641304	9	29,2,61,0	MODIFIER	NONE	intron_variant	Mroh2a	c.1238-93C>G
chr1	88236581	G	A	2420	121	0.619835	5	40,4,74,3	MODIFIER	NONE	intron_variant	Mroh2a	c.1238-74G>A
chr1	88236609	A	G	4283	220	0.604545	10	61,17,124,18	MODIFIER	NONE	intron_variant	Mroh2a	c.1238-46A>G
chr1	88236610	C	T	468	224	0.09375	0	167,33,20,4	MODIFIER	NONE	intron_variant	Mroh2a	c.1238-45C>T
chr1	88236631	T	C	6490	301	0.66113	13	67,31,161,42	MODIFIER	NONE	intron_variant	Mroh2a	c.1238-24T>C
chr1	88236639	G	T	7021	321	0.663551	9	69,34,166,52	MODIFIER	NONE	intron_variant	Mroh2a	c.1238-16G>T
chr1	88236665	T	G	8989	384	0.700521	10	57,47,181,99	MODERATE	NONE	missense_variant	Mroh2a	c.1248T>G
chr1	88236695	C	G	9880	420	0.709524	25	37,65,169,148	LOW	NONE	synonymous_variant	Mroh2a	c.1278C>G
chr1	88236753	T	C	6289	248	0.745968	8	9,45,51,141	MODIFIER	NONE	intron_variant	Mroh2a	c.1314+22T>C
chr1	88236813	A	G	3246	107	0.841121	0	0,17,5,85	MODIFIER	NONE	intron_variant	Mroh2a	c.1314+82A>G
chr1	88236829	T	C	2251	82	0.780488	0	0,16,0,66	MODIFIER	NONE	intron_variant	Mroh2a	c.1314+98T>C
chr1	88236833	G	A	726	76	0.315789	0	0,51,0,25	MODIFIER	NONE	intron_variant	Mroh2a	c.1314+102G>A
chr1	88236834	C	T	2228	75	0.826667	0	0,13,0,62	MODIFIER	NONE	intron_variant	Mroh2a	c.1314+103C>T
chr1	88236835	A	T	2244	75	0.826667	0	0,13,0,62	MODIFIER	NONE	intron_variant	Mroh2a	c.1314+104A>T
chr1	88236938	A	G	394	12	0.916667	0	0,1,0,11	MODIFIER	NONE	intron_variant	Mroh2a	c.1314+207A>G
chr1	88237279	A	G	620	25	0.72	0	5,0,20,0	MODIFIER	NONE	intron_variant	Mroh2a	c.1315-194A>G
chr1	88237300	G	A	483	31	0.483871	0	16,0,15,0	MODIFIER	NONE	intron_variant	Mroh2a	c.1315-173G>A
chr1	88237335	C	T	245	38	0.236842	0	29,0,9,0	MODIFIER	NONE	intron_variant	Mroh2a	c.1315-138C>T
chr1	88237380	C	G	1129	76	0.486842	1	34,4,32,6	MODIFIER	NONE	intron_variant	Mroh2a	c.1315-93C>G
chr1	88237457	T	A	2801	215	0.44186	0	65,51,57,42	MODIFIER	NONE	intron_variant	Mroh2a	c.1315-16T>A
chr1	88237491	C	T	860	207	0.164251	2	79,93,14,21	HIGH	NONE	stop_gained	Mroh2a	c.1333C>T
chr1	88237541	C	A	2154	169	0.426035	0	45,50,34,40	LOW	NONE	synonymous_variant	Mroh2a	c.1383C>A
chr1	88237663	C	CA	211	97	0.463918	10	14,38,20,25	MODIFIER	NONE	intron_variant	Mroh2a	c.1434+71_1434+72insA
chr1	88237714	C	T	2724	102	0.754902	0	14,7,52,29	MODIFIER	NONE	intron_variant	Mroh2a	c.1434+122C>T
chr1	88237716	A	G	871	104	0.288462	4	50,23,18,13	MODIFIER	NONE	intron_variant	Mroh2a	c.1434+124A>G
chr1	88237749	C	G	2985	118	0.720339	2	25,3,74,16	MODIFIER	NONE	intron_variant	Mroh2a	c.1435-96C>G
chr1	88237780	G	A	3565	158	0.708861	3	33,5,97,23	MODIFIER	NONE	intron_variant	Mroh2a	c.1435-65G>A
chr1	88237789	A	T	4018	182	0.686813	3	39,7,106,30	MODIFIER	NONE	intron_variant	Mroh2a	c.1435-56A>T
chr1	88237800	T	A	5551	233	0.729614	1	43,11,136,43	MODIFIER	NONE	intron_variant	Mroh2a	c.1435-45T>A
chr1	88237813	C	T	1331	258	0.20155	1	149,55,38,16	MODIFIER	NONE	intron_variant	Mroh2a	c.1435-32C>T
chr1	88237852	G	T	3021	388	0.273196	0	154,123,63,48	MODERATE	NONE	missense_variant	Mroh2a	c.1442G>T
chr1	88237853	A	C	9992	392	0.732143	2	55,39,163,135	LOW	NONE	synonymous_variant	Mroh2a	c.1443A>C
chr1	88237910	GGATACTGTAAA	G	990	360	0.094444	0	131,197,13,21	HIGH	NONE	frameshift_variant	Mroh2a	c.1504_1514delACTGTAAAGAT
chr1	88237944	G	A	802	255	0.133333	1	60,158,11,24	MODERATE	NONE	missense_variant	Mroh2a	c.1534G>A
chr1	88237968	C	A	752	190	0.168421	6	28,126,3,33	MODIFIER	NONE	intron_variant	Mroh2a	c.1545+13C>A
chr1	88237976	C	T	1182	165	0.260606	15	8,108,10,39	MODIFIER	NONE	intron_variant	Mroh2a	c.1545+21C>T
chr1	88237987	C	T	401	149	0.120805	0	10,120,1,18	MODIFIER	NONE	intron_variant	Mroh2a	c.1545+32C>T
chr1	88237988	C	G	3452	147	0.70068	0	3,38,7,99	MODIFIER	NONE	intron_variant	Mroh2a	c.1545+33C>G
chr1	88237998	T	C	3036	123	0.715447	1	2,28,4,89	MODIFIER	NONE	intron_variant	Mroh2a	c.1545+43T>C
chr1	88238816	G	A	258	73	0.136986	0	59,3,11,0	MODIFIER	NONE	intron_variant	Mroh2a	c.1546-78G>A
chr1	88238850	C	T	300	114	0.114035	6	83,18,13,0	MODIFIER	NONE	intron_variant	Mroh2a	c.1546-44C>T
chr1	88238851	C	G	299	113	0.115044	9	81,19,13,0	MODIFIER	NONE	intron_variant	Mroh2a	c.1546-43C>G
chr1	88238889	T	C	4602	192	0.723958	9	37,12,89,54	LOW	NONE	splice_region_variant&intron_variant	Mroh2a	c.1546-5T>C
chr1	88238947	A	G	5534	232	0.715517	2	30,22,93,87	LOW	NONE	synonymous_variant	Mroh2a	c.1599A>G
chr1	88238983	C	T	918	232	0.163793	2	98,95,22,17	LOW	NONE	synonymous_variant	Mroh2a	c.1635C>T
chr1	88239000	G	T	1180	237	0.189873	0	90,102,20,25	MODERATE	NONE	missense_variant	Mroh2a	c.1652G>T
chr1	88239006	A	C	2456	237	0.362869	8	62,84,48,43	MODERATE	NONE	missense_variant	Mroh2a	c.1658A>C
chr1	88239134	T	C	1901	79	0.734177	0	1,18,4,56	MODIFIER	NONE	intron_variant	Mroh2a	c.1693+93T>C
chr1	88239137	T	C	133	72	0.083333	0	3,63,0,6	MODIFIER	NONE	intron_variant	Mroh2a	c.1693+96T>C
chr1	88239167	C	T	127	43	0.116279	0	0,37,0,6	MODIFIER	NONE	intron_variant	Mroh2a	c.1693+126C>T
chr1	88239184	TA	T	264	32	0.25	0	0,24,0,8	MODIFIER	NONE	intron_variant	Mroh2a	c.1693+144delA
chr1	88239238	C	T	141	18	0.277778	3	1,12,1,4	MODIFIER	NONE	intron_variant	Mroh2a	c.1693+197C>T
chr1	88239249	TGGGTA	T	107	18	0.222222	0	2,12,0,4	MODIFIER	NONE	intron_variant	Mroh2a	c.1693+209_1693+213delGGGTA
chr1	88239253	T	C	164	15	0.333333	0	1,5,1,4	MODIFIER	NONE	intron_variant	Mroh2a	c.1693+212T>C
chr1	88239994	T	A	107	29	0.137931	0	24,0,5,0	MODIFIER	NONE	intron_variant	Mroh2a	c.1694-125T>A
chr1	88240029	A	G	1997	73	0.808219	0	10,0,63,0	MODIFIER	NONE	intron_variant	Mroh2a	c.1694-90A>G
chr1	88240031	G	T	219	74	0.121622	0	65,0,9,0	MODIFIER	NONE	intron_variant	Mroh2a	c.1694-88G>T
chr1	88240033	T	C	315	76	0.157895	0	64,0,12,0	MODIFIER	NONE	intron_variant	Mroh2a	c.1694-86T>C
chr1	88240124	T	C	6606	255	0.780392	1	36,20,133,66	LOW	NONE	synonymous_variant	Mroh2a	c.1699T>C
chr1	88240149	C	T	6973	296	0.706081	0	37,34,118,107	MODERATE	NONE	missense_variant	Mroh2a	c.1724C>T
chr1	88240225	C	T	4564	169	0.781065	0	5,29,25,110	MODIFIER	NONE	intron_variant	Mroh2a	c.1734+66C>T
chr1	88240342	T	G	682	22	0.863636	0	0,2,1,19	MODIFIER	NONE	intron_variant	Mroh2a	c.1734+183T>G
chr1	88240387	T	C	293	11	0.818182	0	0,1,0,10	MODIFIER	NONE	intron_variant	Mroh2a	c.1734+228T>C
chr1	88240618	G	A	122	39	0.128205	0	28,6,4,1	MODIFIER	NONE	intron_variant	Mroh2a	c.1735-61G>A
chr1	88240703	G	A	691	65	0.384615	3	27,13,14,11	MODERATE	NONE	missense_variant	Mroh2a	c.1759G>A
chr1	88240709	G	T	239	64	0.15625	1	33,20,6,5	MODERATE	NONE	missense_variant	Mroh2a	c.1765G>T
chr1	88240802	C	T	2445	89	0.786517	0	9,8,37,35	LOW	NONE	synonymous_variant	Mroh2a	c.1858C>T
chr1	88240839	G	A	2407	92	0.771739	0	9,10,37,36	MODIFIER	NONE	intron_variant	Mroh2a	c.1876+19G>A
chr1	88240969	G	A	3039	121	0.760331	8	27,2,74,18	MODIFIER	NONE	intron_variant	Mroh2a	c.1877-102G>A
chr1	88240993	G	C	481	197	0.106599	1	147,27,19,4	MODIFIER	NONE	intron_variant	Mroh2a	c.1877-78G>C
chr1	88241093	C	T	10619	430	0.727907	4	53,58,168,151	LOW	NONE	synonymous_variant	Mroh2a	c.1899C>T
chr1	88241160	G	A	5992	250	0.716	1	11,53,38,148	MODIFIER	NONE	intron_variant	Mroh2a	c.1929+37G>A
chr1	88241197	C	T	3888	152	0.730263	0	2,38,5,107	MODIFIER	NONE	intron_variant	Mroh2a	c.1929+74C>T
chr1	88241233	G	A	462	93	0.182796	4	1,75,1,16	MODIFIER	NONE	intron_variant	Mroh2a	c.1929+110G>A
chr1	88241245	T	C	1805	77	0.701299	0	0,20,2,55	MODIFIER	NONE	intron_variant	Mroh2a	c.1929+122T>C
chr1	88241325	C	A	447	18	0.722222	0	1,4,3,10	MODIFIER	NONE	intron_variant	Mroh2a	c.1929+202C>A
chr1	88241335	C	T	297	19	0.526316	0	2,6,3,8	MODIFIER	NONE	intron_variant	Mroh2a	c.1930-208C>T
chr1	88241360	T	C	689	26	0.769231	1	3,3,13,7	MODIFIER	NONE	intron_variant	Mroh2a	c.1930-183T>C
chr1	88241361	C	T	304	26	0.384615	9	12,3,5,6	MODIFIER	NONE	intron_variant	Mroh2a	c.1930-182C>T
chr1	88241373	A	G	874	30	0.833333	2	3,2,20,5	MODIFIER	NONE	intron_variant	Mroh2a	c.1930-170A>G
chr1	88241385	A	T	327	35	0.314286	10	23,1,8,3	MODIFIER	NONE	intron_variant	Mroh2a	c.1930-158A>T
chr1	88241391	C	G	1319	45	0.844444	3	5,1,36,3	MODIFIER	NONE	intron_variant	Mroh2a	c.1930-152C>G
chr1	88241417	C	T	501	82	0.219512	8	61,1,18,2	MODIFIER	NONE	intron_variant	Mroh2a	c.1930-126C>T
chr1	88241418	C	G	2504	82	0.841463	4	11,1,68,2	MODIFIER	NONE	intron_variant	Mroh2a	c.1930-125C>G
chr1	88241419	A	T	2459	84	0.821429	4	11,1,70,2	MODIFIER	NONE	intron_variant	Mroh2a	c.1930-124A>T
chr1	88241486	T	G	7137	270	0.766667	8	51,5,205,8	MODIFIER	NONE	intron_variant	Mroh2a	c.1930-57T>G
chr1	88241510	C	T	9729	371	0.762803	1	72,11,255,33	MODIFIER	NONE	intron_variant	Mroh2a	c.1930-33C>T
chr1	88241525	C	T	11893	498	0.722892	1	93,27,298,79	MODIFIER	NONE	intron_variant	Mroh2a	c.1930-18C>T
chr1	88241584	G	A	9543	827	0.401451	4	246235189157	HIGH	NONE	stop_gained	Mroh2a	c.1971G>A
chr1	88241590	A	G	20211	822	0.731144	1	99,93,314,316	LOW	NONE	synonymous_variant	Mroh2a	c.1977A>G
chr1	88241618	A	C	2783	720	0.161111	0	219,380,43,78	MODERATE	NONE	missense_variant	Mroh2a	c.2005A>C
chr1	88241661	G	A	10983	421	0.771972	0	15,74,61,271	MODIFIER	NONE	intron_variant	Mroh2a	c.2037+11G>A
chr1	88241668	C	T	2729	356	0.286517	0	33,218,14,90	MODIFIER	NONE	intron_variant	Mroh2a	c.2037+18C>T
chr1	88241672	A	G	8121	323	0.755418	2	6,66,29,222	MODIFIER	NONE	intron_variant	Mroh2a	c.2037+22A>G
chr1	88241677	T	C	7747	299	0.769231	0	5,58,24,212	MODIFIER	NONE	intron_variant	Mroh2a	c.2037+27T>C
chr1	88241713	G	A	533	186	0.11828	2	7,156,0,23	MODIFIER	NONE	intron_variant	Mroh2a	c.2037+63G>A
chr1	88241732	G	A	953	141	0.248227	0	2,103,1,35	MODIFIER	NONE	intron_variant	Mroh2a	c.2037+82G>A
chr1	88241797	G	A	1617	55	0.854545	0	0,8,0,47	MODIFIER	NONE	intron_variant	Mroh2a	c.2037+147G>A
chr1	88241826	G	T	398	31	0.419355	0	0,17,0,14	MODIFIER	NONE	intron_variant	Mroh2a	c.2037+176G>T
chr1	88241866	T	C	315	12	0.75	0	0,3,0,9	MODIFIER	NONE	intron_variant	Mroh2a	c.2037+216T>C
chr1	88242242	C	T	329	23	0.434783	0	13,0,10,0	MODIFIER	NONE	intron_variant	Mroh2a	c.2038-162C>T
chr1	88242306	TA	T	1590	72	0.791667	2	15,0,53,4	MODIFIER	NONE	intron_variant	Mroh2a	c.2038-97delA
chr1	88242417	G	T	1569	213	0.267606	1	103,51,41,18	MODERATE	NONE	missense_variant	Mroh2a	c.2051G>T
chr1	88242418	G	T	1591	212	0.273585	0	101,50,41,20	MODERATE	NONE	missense_variant	Mroh2a	c.2052G>T
chr1	88242420	C	A	804	217	0.152074	0	118,63,24,12	MODERATE	NONE	missense_variant	Mroh2a	c.2054C>A
chr1	88242421	C	A	813	219	0.150685	0	121,64,23,11	LOW	NONE	synonymous_variant	Mroh2a	c.2055C>A
chr1	88242508	T	C	8455	298	0.828859	1	20,24,125,129	LOW	NONE	synonymous_variant	Mroh2a	c.2142T>C
chr1	88242511	T	C	8459	304	0.819079	0	22,25,124,133	LOW	NONE	synonymous_variant	Mroh2a	c.2145T>C
chr1	88242537	C	T	1277	293	0.177474	0	107,131,24,30	MODIFIER	NONE	intron_variant	Mroh2a	c.2157+14C>T
chr1	88242558	C	T	7268	282	0.769504	3	30,30,98,124	MODIFIER	NONE	intron_variant	Mroh2a	c.2157+35C>T
chr1	88242576	G	T	1025	261	0.16092	0	98,119,21,23	MODIFIER	NONE	intron_variant	Mroh2a	c.2157+53G>T
chr1	88242593	T	C	2643	282	0.333333	0	97,89,50,46	MODIFIER	NONE	intron_variant	Mroh2a	c.2157+70T>C
chr1	88242606	A	G	7788	297	0.801347	0	31,26,133,107	MODIFIER	NONE	intron_variant	Mroh2a	c.2158-63A>G
chr1	88242654	C	T	1347	347	0.167147	0	151,136,32,28	MODIFIER	NONE	intron_variant	Mroh2a	c.2158-15C>T
chr1	88242655	C	G	9616	342	0.812865	4	34,24,145,138	MODIFIER	NONE	intron_variant	Mroh2a	c.2158-14C>G
chr1	88242692	G	A	1189	304	0.161184	0	101,153,20,30	LOW	NONE	synonymous_variant	Mroh2a	c.2181G>A
chr1	88242760	C	T	1730	153	0.385621	6	21,72,8,52	MODERATE	NONE	missense_variant	Mroh2a	c.2249C>T
chr1	88242764	A	G	3586	148	0.722973	0	7,28,22,91	LOW	NONE	synonymous_variant	Mroh2a	c.2253A>G
chr1	88242779	C	T	644	125	0.2	3	17,83,6,19	LOW	NONE	synonymous_variant	Mroh2a	c.2268C>T
chr1	88242807	T	G	2660	97	0.793814	1	3,16,10,68	MODIFIER	NONE	intron_variant	Mroh2a	c.2280+16T>G
chr1	88242835	A	C	389	70	0.228571	2	2,52,1,15	MODIFIER	NONE	intron_variant	Mroh2a	c.2280+44A>C
chr1	88242839	A	G	1544	58	0.775862	13	2,11,0,45	MODIFIER	NONE	intron_variant	Mroh2a	c.2280+48A>G
chr1	88242851	G	T	195	48	0.166667	0	1,39,0,8	MODIFIER	NONE	intron_variant	Mroh2a	c.2280+60G>T
chr1	88242853	G	T	188	46	0.152174	0	1,38,0,7	MODIFIER	NONE	intron_variant	Mroh2a	c.2280+62G>T
chr1	88242876	T	G	289	34	0.294118	0	0,24,0,10	MODIFIER	NONE	intron_variant	Mroh2a	c.2280+85T>G
chr1	88243713	C	A	124	10	0.4	0	6,0,4,0	MODIFIER	NONE	intron_variant	Mroh2a	c.2281-218C>A
chr1	88243861	TTCCCCCTTCCCTGC	T	1116	111	0.36036	7	50,4,33,7	MODIFIER	NONE	intron_variant	Mroh2a	c.2281-69_2281-56delTCCCCCTTCCCTGC
chr1	88243861	TTCCCCCTTCCCTG	T	415	111	0.153153	4	50,4,14,3	MODIFIER	NONE	intron_variant	Mroh2a	c.2281-69_2281-57delTCCCCCTTCCCTG
chr1	88243874	GC	G	353	93	0.182796	0	63,12,14,3	MODIFIER	NONE	intron_variant	Mroh2a	c.2281-56delC
chr1	88243950	G	A	1070	310	0.13871	2	146,118,27,18	MODERATE	NONE	missense_variant	Mroh2a	c.2300G>A
chr1	88244002	C	T	1287	297	0.181818	7	124,119,22,32	LOW	NONE	synonymous_variant	Mroh2a	c.2352C>T
chr1	88244014	G	A	6994	284	0.739437	2	30,37,106,111	LOW	NONE	synonymous_variant	Mroh2a	c.2364G>A
chr1	88244083	G	A	546	199	0.120603	3	56,118,6,19	LOW	NONE	splice_region_variant&synonymous_variant	Mroh2a	c.2433G>A
chr1	88244118	T	C	3300	138	0.717391	4	5,31,23,79	MODIFIER	NONE	intron_variant	Mroh2a	c.2433+35T>C
chr1	88244146	A	G	2805	90	0.888889	0	0,10,7,73	MODIFIER	NONE	intron_variant	Mroh2a	c.2433+63A>G
chr1	88244157	G	A	882	76	0.381579	5	3,43,0,30	MODIFIER	NONE	intron_variant	Mroh2a	c.2433+74G>A
chr1	88244164	T	C	2215	69	0.869565	0	0,7,1,61	MODIFIER	NONE	intron_variant	Mroh2a	c.2433+81T>C
chr1	88244202	G	T	128	44	0.113636	0	1,38,0,5	MODIFIER	NONE	intron_variant	Mroh2a	c.2433+119G>T
chr1	88244780	C	T	610	22	0.818182	0	3,0,19,0	MODIFIER	NONE	intron_variant	Mroh2a	c.2434-164C>T
chr1	88244790	GAACA	G	158	24	0.208333	0	19,0,5,0	MODIFIER	NONE	intron_variant	Mroh2a	c.2434-153_2434-150delAACA
chr1	88244808	G	A	196	31	0.225806	0	23,1,7,0	MODIFIER	NONE	intron_variant	Mroh2a	c.2434-136G>A
chr1	88244836	G	GAAGATCAA	333	44	0.25	0	32,1,11,0	MODIFIER	NONE	intron_variant	Mroh2a	c.2434-108_2434-107insAAGATCAA
chr1	88244839	C	A	336	47	0.276596	0	33,1,13,0	MODIFIER	NONE	intron_variant	Mroh2a	c.2434-105C>A
chr1	88244844	C	T	1318	54	0.722222	0	12,1,39,2	MODIFIER	NONE	intron_variant	Mroh2a	c.2434-100C>T
chr1	88244970	G	T	2278	263	0.30038	2	126,56,53,28	MODERATE	NONE	missense_variant	Mroh2a	c.2460G>T
chr1	88244995	G	T	1179	339	0.138643	5	204,85,39,11	MODERATE	NONE	missense_variant	Mroh2a	c.2485G>T
chr1	88245126	C	T	8701	319	0.802508	1	12,46,61,200	MODIFIER	NONE	intron_variant	Mroh2a	c.2556+60C>T
chr1	88245145	A	G	6991	254	0.787402	5	5,45,34,170	MODIFIER	NONE	intron_variant	Mroh2a	c.2556+79A>G
chr1	88245187	T	C	3216	128	0.734375	4	1,25,1,101	MODIFIER	NONE	intron_variant	Mroh2a	c.2556+121T>C
chr1	88245240	G	A	1412	66	0.651515	0	1,22,3,40	MODIFIER	NONE	intron_variant	Mroh2a	c.2556+174G>A
chr1	88245291	G	T	732	24	0.875	0	0,2,4,18	MODIFIER	NONE	intron_variant	Mroh2a	c.2556+225G>T
chr1	88245319	C	CCAGTCAG	413	16	0.6875	0	1,4,1,10	MODIFIER	NONE	intron_variant	Mroh2a	c.2556+253_2556+254insCAGTCAG
chr1	88245338	G	A	114	17	0.235294	2	1,11,1,4	MODIFIER	NONE	intron_variant	Mroh2a	c.2556+272G>A
chr1	88245373	G	T	216	11	0.545455	4	1,3,0,7	MODIFIER	NONE	intron_variant	Mroh2a	c.2556+307G>T
chr1	88245378	A	T	321	11	0.818182	7	1,1,0,9	MODIFIER	NONE	intron_variant	Mroh2a	c.2556+312A>T
chr1	88245805	C	CT	643	24	0.708333	0	7,0,16,1	MODIFIER	NONE	intron_variant	Mroh2a	c.2557-183_2557-182insT
chr1	88245871	A	G	1463	68	0.647059	0	21,0,47,0	MODIFIER	NONE	intron_variant	Mroh2a	c.2557-117A>G
chr1	88245878	C	T	1763	79	0.670886	0	22,0,57,0	MODIFIER	NONE	intron_variant	Mroh2a	c.2557-110C>T
chr1	88245919	C	T	515	146	0.143836	3	109,15,20,1	MODIFIER	NONE	intron_variant	Mroh2a	c.2557-69C>T
chr1	88245920	C	G	449	153	0.143791	3	114,17,21,1	MODIFIER	NONE	intron_variant	Mroh2a	c.2557-68C>G
chr1	88245924	A	C	96	166	0.03012	33	91,19,56,0	MODIFIER	NONE	intron_variant	Mroh2a	c.2557-64A>C
chr1	88245949	G	A	4198	183	0.68306	13	31,21,98,33	MODIFIER	NONE	intron_variant	Mroh2a	c.2557-39G>A
chr1	88245989	T	C	10040	408	0.730392	1	56,41,187,122	MODERATE	NONE	missense_variant&splice_region_variant	Mroh2a	c.2558T>C
chr1	88246017	C	T	1599	520	0.134615	1	241,207,40,31	LOW	NONE	synonymous_variant	Mroh2a	c.2586C>T
chr1	88246042	G	C	1499	488	0.131148	4	192,232,33,31	MODERATE	NONE	missense_variant	Mroh2a	c.2611G>C
chr1	88246065	A	G	10101	400	0.7525	10	28,59,135,178	LOW	NONE	splice_region_variant&synonymous_variant	Mroh2a	c.2634A>G
chr1	88246132	T	C	2087	139	0.611511	12	1,51,10,77	MODIFIER	NONE	intron_variant	Mroh2a	c.2636+65T>C
chr1	88246156	C	A	3495	121	0.809917	0	0,20,2,99	MODIFIER	NONE	intron_variant	Mroh2a	c.2636+89C>A
chr1	88246207	C	G	156	51	0.117647	0	0,43,0,8	MODIFIER	NONE	intron_variant	Mroh2a	c.2636+140C>G
chr1	88246230	T	G	906	32	0.8125	0	0,5,0,27	MODIFIER	NONE	intron_variant	Mroh2a	c.2636+163T>G
chr1	88246296	G	A	252	10	0.7	0	0,1,0,9	MODIFIER	NONE	intron_variant	Mroh2a	c.2636+229G>A
chr1	88246905	C	A	250	11	0.636364	0	3,0,8,0	MODIFIER	NONE	intron_variant	Mroh2a	c.2637-231C>A
chr1	88246937	A	G	507	20	0.7	0	5,0,15,0	MODIFIER	NONE	intron_variant	Mroh2a	c.2637-199A>G
chr1	88246958	A	AT	866	30	0.766667	0	7,0,22,1	MODIFIER	NONE	intron_variant	Mroh2a	c.2637-178_2637-177insT
chr1	88246977	A	C	785	35	0.657143	0	10,0,23,2	MODIFIER	NONE	intron_variant	Mroh2a	c.2637-159A>C
chr1	88246978	G	A	599	36	0.527778	3	16,0,18,2	MODIFIER	NONE	intron_variant	Mroh2a	c.2637-158G>A
chr1	88247000	G	A	1296	53	0.754717	0	11,0,40,2	MODIFIER	NONE	intron_variant	Mroh2a	c.2637-136G>A
chr1	88247028	T	C	2041	80	0.725	0	20,0,58,2	MODIFIER	NONE	intron_variant	Mroh2a	c.2637-108T>C
chr1	88247066	C	T	719	173	0.16763	0	139,4,29,1	MODIFIER	NONE	intron_variant	Mroh2a	c.2637-70C>T
chr1	88247123	T	C	7665	402	0.584577	0	115,39,188,60	MODIFIER	NONE	intron_variant	Mroh2a	c.2637-13T>C
chr1	88247139	G	A	2844	487	0.217659	2	255,123,77,32	LOW	NONE	synonymous_variant	Mroh2a	c.2640G>A
chr1	88247140	A	C	12520	494	0.736842	0	81,38,253,122	MODERATE	NONE	missense_variant	Mroh2a	c.2641A>C
chr1	88247172	A	G	2509	574	0.172474	1	251,223,51,49	LOW	NONE	synonymous_variant	Mroh2a	c.2673A>G
chr1	88247232	T	C	10259	431	0.721578	0	33,78,90,229	LOW	NONE	synonymous_variant	Mroh2a	c.2733T>C
chr1	88247237	C	T	4628	404	0.40099	0	60,178,42,124	MODERATE	NONE	missense_variant	Mroh2a	c.2738C>T
chr1	88247262	G	A	787	281	0.120996	5	34,211,2,33	MODIFIER	NONE	intron_variant	Mroh2a	c.2745+18G>A
chr1	88247267	G	A	1272	263	0.193916	3	23,187,8,45	MODIFIER	NONE	intron_variant	Mroh2a	c.2745+23G>A
chr1	88247303	CGTT	C	3396	133	0.684211	9	2,48,0,91	MODIFIER	NONE	intron_variant	Mroh2a	c.2745+60_2745+62delGTT
chr1	88247362	A	G	686	32	0.65625	0	0,11,0,21	MODIFIER	NONE	intron_variant	Mroh2a	c.2745+118A>G
chr1	88247423	C	T	212	12	0.5	0	0,5,0,7	MODIFIER	NONE	intron_variant	Mroh2a	c.2745+179C>T
chr1	88247424	A	G	207	12	0.5	0	0,5,0,7	MODIFIER	NONE	intron_variant	Mroh2a	c.2745+180A>G
chr1	88247446	A	G	187	10	0.6	0	0,4,0,6	MODIFIER	NONE	intron_variant	Mroh2a	c.2745+202A>G
chr1	88247683	A	G	1399	64	0.6875	16	16,3,45,0	MODIFIER	NONE	intron_variant	Mroh2a	c.2746-65A>G
chr1	88247703	C	A	168	74	0.094595	0	63,4,7,0	MODIFIER	NONE	intron_variant	Mroh2a	c.2746-45C>A
chr1	88247708	T	TTCTCTCTC	78	77	0.038961	0	57,4,3,0	MODIFIER	NONE	intron_variant	Mroh2a	c.2746-40_2746-39insTCTCTCTC
chr1	88247708	T	TTCTCTC	205	77	0.090909	0	57,4,7,0	MODIFIER	NONE	intron_variant	Mroh2a	c.2746-40_2746-39insTCTCTC
chr1	88247708	TTC	T	79	77	0.038961	0	69,2,3,0	MODIFIER	NONE	intron_variant	Mroh2a	c.2746-39_2746-38delTC
chr1	88247732	C	CTCTCTCTT	87	120	0.033333	0	97,18,4,0	MODIFIER	NONE	intron_variant	Mroh2a	c.2746-16_2746-15insTCTCTCTT
chr1	88247763	A	G	4675	222	0.644144	3	46,14,113,49	MODERATE	NONE	missense_variant	Mroh2a	c.2761A>G
chr1	88247852	T	C	6258	240	0.775	1	16,36,65,123	MODIFIER	NONE	intron_variant	Mroh2a	c.2841+9T>C
chr1	88247900	G	A	1598	122	0.434426	1	6,62,6,48	MODIFIER	NONE	intron_variant	Mroh2a	c.2841+57G>A
chr1	88247917	C	T	308	94	0.138298	0	5,76,1,12	MODIFIER	NONE	intron_variant	Mroh2a	c.2841+74C>T
chr1	88247919	G	T	2117	86	0.744186	0	1,21,2,62	MODIFIER	NONE	intron_variant	Mroh2a	c.2841+76G>T
chr1	88247920	C	A	615	84	0.27381	0	2,58,1,23	MODIFIER	NONE	intron_variant	Mroh2a	c.2841+77C>A
chr1	88247955	A	T	1299	52	0.730769	0	0,14,1,37	MODIFIER	NONE	intron_variant	Mroh2a	c.2841+112A>T
chr1	88247972	C	T	98	37	0.108108	0	2,31,0,4	MODIFIER	NONE	intron_variant	Mroh2a	c.2841+129C>T
chr1	88248029	A	G	601	21	0.809524	3	1,3,2,15	MODIFIER	NONE	intron_variant	Mroh2a	c.2841+186A>G
chr1	88248081	G	A	148	13	0.384615	0	0,8,0,5	MODIFIER	NONE	intron_variant	Mroh2a	c.2841+238G>A
chr1	88248429	A	T	942	42	0.642857	0	12,0,29,1	MODIFIER	NONE	intron_variant	Mroh2a	c.2842-123A>T
chr1	88248440	G	A	1163	50	0.72	0	13,0,36,1	MODIFIER	NONE	intron_variant	Mroh2a	c.2842-112G>A
chr1	88248472	C	T	461	88	0.193182	0	68,3,16,1	MODIFIER	NONE	intron_variant	Mroh2a	c.2842-80C>T
chr1	88248474	A	T	2022	91	0.67033	0	22,1,63,4	MODIFIER	NONE	intron_variant	Mroh2a	c.2842-78A>T
chr1	88248494	G	A	2527	125	0.632	2	32,2,81,10	MODIFIER	NONE	intron_variant	Mroh2a	c.2842-58G>A
chr1	88248530	G	A	1041	205	0.195122	3	127,36,29,12	MODIFIER	NONE	intron_variant	Mroh2a	c.2842-22G>A
chr1	88248555	C	A	1416	276	0.199275	1	136,80,36,24	MODERATE	NONE	missense_variant	Mroh2a	c.2845C>A
chr1	88248584	G	A	7477	320	0.70625	0	47,43,115,115	LOW	NONE	synonymous_variant	Mroh2a	c.2874G>A
chr1	88248586	G	A	1371	321	0.168224	1	133,133,26,29	HIGH	NONE	stop_gained	Mroh2a	c.2876G>A
chr1	88248605	G	T	975	302	0.13245	0	109,152,18,23	MODERATE	NONE	missense_variant	Mroh2a	c.2895G>T
chr1	88248614	T	C	6924	283	0.724382	0	30,46,79,128	LOW	NONE	synonymous_variant	Mroh2a	c.2904T>C
chr1	88248621	C	T	4328	260	0.526923	0	42,78,47,93	MODERATE	NONE	missense_variant	Mroh2a	c.2911C>T
chr1	88248655	G	A	550	153	0.150327	0	31,96,6,20	MODERATE	NONE	missense_variant&splice_region_variant	Mroh2a	c.2945G>A
chr1	88248669	A	ACTGCCTCCCCCTAC	73	111	0.081081	1	20,71,1,8	MODIFIER	NONE	intron_variant	Mroh2a	c.2946+13_2946+14insCTGCCTCCCCCTAC
chr1	88248669	AC	A	73	111	0.063063	0	21,85,1,6	MODIFIER	NONE	intron_variant	Mroh2a	c.2946+14delC
chr1	88248704	C	T	366	73	0.191781	0	1,58,0,14	MODIFIER	NONE	intron_variant	Mroh2a	c.2946+48C>T
chr1	88248816	T	A	158	10	0.5	0	1,4,0,5	MODIFIER	NONE	intron_variant	Mroh2a	c.2946+160T>A
chr1	88248830	G	T	144	10	0.5	0	1,4,0,5	MODIFIER	NONE	intron_variant	Mroh2a	c.2946+174G>T
chr1	88249501	TG	T	425	19	0.631579	9	5,2,12,0	MODIFIER	NONE	intron_variant	Mroh2a	c.2947-201delG
chr1	88249557	T	A	708	47	0.468085	0	24,1,22,0	MODIFIER	NONE	intron_variant	Mroh2a	c.2947-146T>A
chr1	88249568	A	G	1538	58	0.775862	6	11,1,46,0	MODIFIER	NONE	intron_variant	Mroh2a	c.2947-135A>G
chr1	88249598	C	T	514	115	0.182609	1	82,8,24,1	MODIFIER	NONE	intron_variant	Mroh2a	c.2947-105C>T
chr1	88249686	C	T	1145	294	0.156463	0	151,94,31,18	MODIFIER	NONE	intron_variant	Mroh2a	c.2947-17C>T
chr1	88249700	T	C	8059	316	0.775316	0	36,29,143,108	LOW	NONE	splice_region_variant&intron_variant	Mroh2a	c.2947-3T>C
chr1	88249744	C	T	1086	327	0.137615	2	136,144,20,27	LOW	NONE	synonymous_variant	Mroh2a	c.2988C>T
chr1	88249832	G	A	1083	220	0.190909	9	56,120,20,24	LOW	NONE	splice_region_variant&intron_variant	Mroh2a	c.3070+6G>A
chr1	88249861	A	G	4847	187	0.759358	2	11,29,32,115	MODIFIER	NONE	intron_variant	Mroh2a	c.3070+35A>G
chr1	88249869	A	C	4359	174	0.741379	3	9,31,22,112	MODIFIER	NONE	intron_variant	Mroh2a	c.3070+43A>C
chr1	88249970	C	T	1057	36	0.833333	3	1,5,2,28	MODIFIER	NONE	intron_variant	Mroh2a	c.3070+144C>T
chr1	88249990	A	C	138	28	0.178571	0	3,20,0,5	MODIFIER	NONE	intron_variant	Mroh2a	c.3070+164A>C
chr1	88250045	T	C	188	18	0.333333	0	4,8,2,4	MODIFIER	NONE	intron_variant	Mroh2a	c.3070+219T>C
chr1	88250101	T	C	487	21	0.666667	11	4,2,15,0	MODIFIER	NONE	intron_variant	Mroh2a	c.3071-164T>C
chr1	88250119	A	G	168	29	0.206897	0	21,2,6,0	MODIFIER	NONE	intron_variant	Mroh2a	c.3071-146A>G
chr1	88250266	A	G	5043	199	0.748744	1	33,12,107,46	LOW	NONE	splice_region_variant&synonymous_variant	Mroh2a	c.3072A>G
chr1	88250268	G	A	1055	199	0.20603	4	111,46,26,16	MODERATE	NONE	missense_variant	Mroh2a	c.3074G>A
chr1	88250342	G	A	938	293	0.133106	0	137,116,21,18	MODERATE	NONE	missense_variant	Mroh2a	c.3148G>A
chr1	88250393	G	A	6554	281	0.697509	0	27,45,82,127	MODIFIER	NONE	intron_variant	Mroh2a	c.3189+10G>A
chr1	88250425	C	T	1499	203	0.26601	0	35,111,13,43	MODIFIER	NONE	intron_variant	Mroh2a	c.3189+42C>T
chr1	88250436	T	C	4085	158	0.746835	0	7,28,22,101	MODIFIER	NONE	intron_variant	Mroh2a	c.3189+53T>C
chr1	88250492	C	T	1547	60	0.733333	6	1,13,0,46	MODIFIER	NONE	intron_variant	Mroh2a	c.3189+109C>T
chr1	88250557	G	C	636	24	0.75	0	0,5,1,18	MODIFIER	NONE	intron_variant	Mroh2a	c.3189+174G>C
chr1	88250616	T	C	320	12	0.75	0	0,3,0,9	MODIFIER	NONE	intron_variant	Mroh2a	c.3189+233T>C
chr1	88251173	G	A	6995	246	0.817073	10	34,7,188,17	MODIFIER	NONE	intron_variant	Mroh2a	c.3190-72G>A
chr1	88251187	C	G	8511	301	0.79402	1	50,9,209,32	MODIFIER	NONE	intron_variant	Mroh2a	c.3190-58C>G
chr1	88251195	A	G	9726	332	0.822289	0	48,10,227,47	MODIFIER	NONE	intron_variant	Mroh2a	c.3190-50A>G
chr1	88251229	T	C	12988	458	0.80786	3	55,28,264,110	MODIFIER	NONE	intron_variant	Mroh2a	c.3190-16T>C
chr1	88251267	G	T	13051	511	0.745597	0	57,55,201,198	MODERATE	NONE	missense_variant	Mroh2a	c.3212G>T
chr1	88251289	C	T	1873	466	0.158798	3	160,230,27,49	LOW	NONE	synonymous_variant	Mroh2a	c.3234C>T
chr1	88251346	C	T	6798	275	0.738182	7	21,47,46,161	LOW	NONE	synonymous_variant	Mroh2a	c.3291C>T
chr1	88251365	C	T	982	252	0.15873	6	57,155,7,33	MODERATE	NONE	missense_variant	Mroh2a	c.3310C>T
chr1	88251374	C	T	866	237	0.147679	5	47,153,5,30	MODERATE	NONE	missense_variant	Mroh2a	c.3319C>T
chr1	88251385	G	T	2928	209	0.454545	2	28,80,22,79	MODERATE	NONE	missense_variant	Mroh2a	c.3330G>T
chr1	88251421	C	CTTGGA	2654	139	0.52518	14	20,50,10,63	MODIFIER	NONE	intron_variant	Mroh2a	c.3342+24_3342+25insTTGGA
chr1	88251459	C	A	1786	81	0.666667	7	3,22,2,54	MODIFIER	NONE	intron_variant	Mroh2a	c.3342+62C>A
chr1	88251472	T	C	1297	57	0.701754	0	0,17,0,40	MODIFIER	NONE	intron_variant	Mroh2a	c.3342+75T>C
chr1	88251479	C	T	1258	50	0.72	0	0,14,0,36	MODIFIER	NONE	intron_variant	Mroh2a	c.3342+82C>T
chr1	88251490	A	G	662	47	0.446809	0	0,26,0,21	MODIFIER	NONE	intron_variant	Mroh2a	c.3342+93A>G
chr1	88251561	C	T	512	17	0.823529	0	0,2,1,14	MODIFIER	NONE	intron_variant	Mroh2a	c.3342+164C>T
chr1	88251584	T	C	394	13	0.846154	0	0,2,1,10	MODIFIER	NONE	intron_variant	Mroh2a	c.3342+187T>C
chr1	88252146	C	T	582	19	0.894737	0	2,0,16,1	MODIFIER	NONE	intron_variant	Mroh2a	c.3343-190C>T
chr1	88252171	C	T	493	30	0.5	3	13,1,16,0	MODIFIER	NONE	intron_variant	Mroh2a	c.3343-165C>T
chr1	88252198	T	C	1278	51	0.705882	0	15,0,35,1	MODIFIER	NONE	intron_variant	Mroh2a	c.3343-138T>C
chr1	88252201	A	T	1306	57	0.684211	0	18,0,38,1	MODIFIER	NONE	intron_variant	Mroh2a	c.3343-135A>T
chr1	88252231	CTCTT	C	297	97	0.103093	7	87,1,9,1	MODIFIER	NONE	intron_variant	Mroh2a	c.3343-104_3343-101delTCTT
chr1	88252259	A	G	3297	139	0.697842	4	40,2,87,10	MODIFIER	NONE	intron_variant	Mroh2a	c.3343-77A>G
chr1	88252313	A	G	7585	339	0.678466	3	65,23,175,76	MODIFIER	NONE	intron_variant	Mroh2a	c.3343-23A>G
chr1	88252383	T	C	8160	358	0.687151	0	41,58,102,157	LOW	NONE	synonymous_variant	Mroh2a	c.3390T>C
chr1	88252401	A	G	613	314	0.092357	0	100,185,10,19	LOW	NONE	synonymous_variant	Mroh2a	c.3408A>G
chr1	88252457	C	T	550	257	0.101167	6	86,145,13,13	MODERATE	NONE	missense_variant	Mroh2a	c.3464C>T
chr1	88252458	A	G	5412	251	0.657371	0	31,48,67,105	LOW	NONE	synonymous_variant	Mroh2a	c.3465A>G
chr1	88252477	C	T	5270	244	0.651639	2	25,52,61,106	LOW	NONE	synonymous_variant	Mroh2a	c.3484C>T
chr1	88252622	A	G	821	30	0.766667	0	0,6,0,24	MODIFIER	NONE	intron_variant	Mroh2a	c.3497+132A>G
chr1	88252625	T	C	780	29	0.758621	0	0,6,0,23	MODIFIER	NONE	intron_variant	Mroh2a	c.3497+135T>C
chr1	88252669	C	T	129	11	0.363636	0	0,7,0,4	MODIFIER	NONE	intron_variant	Mroh2a	c.3497+179C>T
chr1	88254676	C	T	152	14	0.357143	0	9,0,5,0	MODIFIER	MODIFIER	NONE	NONE	downstream_gene_variant
chr1	88254710	C	G	101	24	0.166667	0	20,0,4,0	MODIFIER	MODIFIER	NONE	NONE	downstream_gene_variant
chr1	88254739	C	T	963	42	0.666667	0	11,0,31,0	MODIFIER	MODIFIER	NONE	NONE	downstream_gene_variant
chr1	88254786	G	A	486	101	0.188119	0	70,8,20,2	MODIFIER	MODIFIER	NONE	NONE	downstream_gene_variant
chr1	88254812	A	G	1083	174	0.235632	2	104,29,30,11	MODIFIER	MODIFIER	NONE	NONE	downstream_gene_variant
chr1	88254834	C	T	1480	225	0.248889	3	112,56,42,15	MODIFIER	MODIFIER	NONE	NONE	downstream_gene_variant
chr1	88254845	T	C	2436	244	0.348361	8	104,50,52,38	MODIFIER	MODIFIER	NONE	NONE	downstream_gene_variant
chr1	88254906	A	C	1851	264	0.257576	1	84,108,33,39	LOW	MODIFIER	NONE	NONE	synonymous_variant
chr1	88254935	G	T	778	214	0.149533	3	67,111,11,25	MODERATE	MODIFIER	NONE	NONE	missense_variant
chr1	88254948	G	A	320	210	0.071429	2	77,116,8,9	LOW	MODIFIER	NONE	NONE	synonymous_variant
chr1	88254965	A	T	332	213	0.075117	0	81,116,7,9	MODERATE	MODIFIER	NONE	NONE	missense_variant
chr1	88255048	C	T	1029	176	0.232955	15	63,60,36,16	MODIFIER	MODIFIER	NONE	NONE	downstream_gene_variant
chr1	88255050	G	C	1249	182	0.252747	13	81,47,25,29	MODIFIER	MODIFIER	NONE	NONE	downstream_gene_variant
chr1	88255203	G	A	673	190	0.147368	11	68,92,7,23	LOW	MODIFIER	NONE	NONE	synonymous_variant
chr1	88255245	T	C	3977	172	0.697674	5	20,24,46,82	LOW	MODIFIER	NONE	NONE	synonymous_variant
chr1	88255275	C	T	594	126	0.18254	0	30,73,6,17	LOW	MODIFIER	NONE	NONE	synonymous_variant
chr1	88255315	G	A	534	88	0.227273	2	15,49,7,17	MODIFIER	MODIFIER	NONE	NONE	downstream_gene_variant
chr1	88255375	A	C	144	61	0.098361	3	18,29,1,6	MODIFIER	MODIFIER	NONE	NONE	downstream_gene_variant
chr1	88255375	A	T	172	61	0.114754	0	18,29,3,4	MODIFIER	MODIFIER	NONE	NONE	downstream_gene_variant
chr1	88255409	A	C	709	73	0.328767	2	33,15,15,10	MODIFIER	MODIFIER	NONE	NONE	downstream_gene_variant
chr1	88255427	C	A	439	89	0.191011	6	51,20,16,2	MODIFIER	MODIFIER	NONE	NONE	downstream_gene_variant
chr1	88255539	C	A	1922	273	0.260073	4	109,92,44,28	LOW	MODIFIER	NONE	NONE	splice_region_variant&intron_variant
chr1	88255565	C	A	837	276	0.123188	0	113,128,16,19	MODERATE	MODIFIER	NONE	NONE	missense_variant
chr1	88255607	T	C	2034	244	0.303279	16	61,107,39,36	LOW	MODIFIER	NONE	NONE	synonymous_variant
chr1	88255633	G	A	996	221	0.176471	8	60,120,19,22	LOW	MODIFIER	NONE	NONE	synonymous_variant
chr1	88255655	C	G	816	193	0.165803	2	50,111,12,20	MODERATE	MODIFIER	NONE	NONE	missense_variant
chr1	88255847	C	G	390	15	0.733333	3	0,2,6,7	MODIFIER	MODIFIER	NONE	NONE	downstream_gene_variant
chr1	88255894	A	G	144	15	0.333333	0	5,4,4,2	MODIFIER	MODIFIER	NONE	NONE	downstream_gene_variant
chr1	88255965	T	C	637	42	0.47619	1	20,2,17,3	MODIFIER	MODIFIER	NONE	NONE	downstream_gene_variant
chr1	88255968	A	G	603	48	0.416667	1	25,2,18,3	MODIFIER	MODIFIER	NONE	NONE	downstream_gene_variant
chr1	88255977	T	A	210	52	0.153846	0	39,5,7,1	MODIFIER	MODIFIER	NONE	NONE	downstream_gene_variant
chr1	88255997	A	AG	1874	69	0.753623	2	15,2,49,3	MODIFIER	MODIFIER	NONE	NONE	downstream_gene_variant
chr1	88256029	T	A	1571	135	0.4	8	56,20,50,9	MODIFIER	MODIFIER	NONE	NONE	downstream_gene_variant
chr1	88256051	C	A	666	176	0.153409	3	100,45,19,12	LOW	MODIFIER	NONE	NONE	splice_region_variant&intron_variant
chr1	88256090	G	A	2131	230	0.321739	8	84,69,34,43	LOW	MODIFIER	NONE	NONE	synonymous_variant
chr1	88256096	G	A	597	236	0.110169	3	102,108,15,11	LOW	MODIFIER	NONE	NONE	synonymous_variant
chr1	88256127	G	A	1969	205	0.336585	3	58,78,25,44	MODERATE	MODIFIER	NONE	NONE	missense_variant
chr1	88256155	C	T	315	160	0.0875	2	54,89,5,12	MODERATE	MODIFIER	NONE	NONE	missense_variant
chr1	88256166	G	GT	1366	141	0.29078	0	33,69,13,28	HIGH	MODIFIER	NONE	NONE	frameshift_variant
chr1	88256213	G	A	624	89	0.258427	10	28,37,5,19	MODIFIER	MODIFIER	NONE	NONE	downstream_gene_variant
chr1	88256323	C	T	2207	208	0.355769	0	113,20,63,12	MODIFIER	MODIFIER	NONE	NONE	downstream_gene_variant
chr1	88256324	C	T	2133	214	0.341121	0	118,20,64,12	MODIFIER	MODIFIER	NONE	NONE	downstream_gene_variant
chr1	88256326	T	G	1195	226	0.212389	0	149,27,43,7	MODIFIER	MODIFIER	NONE	NONE	downstream_gene_variant
chr1	88256392	T	C	4847	449	0.374165	12	191,88,101,69	LOW	MODIFIER	NONE	NONE	splice_region_variant&intron_variant
chr1	88256413	C	T	1260	499	0.11022	1	244,195,31,28	MODERATE	MODIFIER	NONE	NONE	missense_variant
chr1	88256468	T	C	11141	439	0.738041	0	36,66,124,213	LOW	MODIFIER	NONE	NONE	synonymous_variant
chr1	88256545	G	A	1197	309	0.15534	0	97,160,19,33	MODERATE	MODIFIER	NONE	NONE	missense_variant
chr1	88256597	A	G	5329	202	0.767327	1	12,31,51,108	MODIFIER	MODIFIER	NONE	NONE	downstream_gene_variant
chr1	88256705	C	T	1145	167	0.251497	4	75,43,35,14	HIGH	MODIFIER	NONE	NONE	stop_gained
chr1	88256727	C	T	1637	194	0.309278	0	79,46,45,24	MODERATE	MODIFIER	NONE	NONE	missense_variant
chr1	88256754	T	C	720	252	0.123016	0	121,95,18,16	MODERATE	MODIFIER	NONE	NONE	missense_variant
chr1	88256798	G	A	2326	304	0.282895	1	88,117,40,59	MODERATE	MODIFIER	NONE	NONE	missense_variant
chr1	88256871	G	C	1187	159	0.27673	1	24,89,8,38	MODIFIER	MODIFIER	NONE	NONE	downstream_gene_variant
chr1	88256896	C	T	452	81	0.209877	2	4,59,0,18	MODIFIER	MODIFIER	NONE	NONE	downstream_gene_variant
chr1	88256991	G	C	184	16	0.375	0	0,10,0,6	MODIFIER	MODIFIER	NONE	NONE	downstream_gene_variant
chr1	88257529	CT	C	147	28	0.178571	0	23,0,5,0	MODIFIER	MODIFIER	NONE	NONE	downstream_gene_variant
chr1	88257567	C	T	179	48	0.145833	0	40,1,7,0	MODIFIER	MODIFIER	NONE	NONE	downstream_gene_variant
chr1	88257577	G	T	227	54	0.166667	0	44,1,9,0	MODIFIER	MODIFIER	NONE	NONE	downstream_gene_variant
chr1	88257647	G	T	1475	184	0.298913	0	103,26,45,10	MODIFIER	MODIFIER	NONE	NONE	downstream_gene_variant
chr1	88257683	C	T	2154	287	0.275261	4	141,57,58,31	MODIFIER	MODIFIER	NONE	NONE	downstream_gene_variant
chr1	88257739	T	C	3044	346	0.309249	0	109,127,49,61	LOW	MODIFIER	NONE	NONE	synonymous_variant
chr1	88257802	G	C	910	226	0.159292	0	57,130,12,27	MODERATE	MODIFIER	NONE	NONE	missense_variant
chr1	88257889	A	G	318	77	0.155844	9	5,60,3,9	MODIFIER	MODIFIER	NONE	NONE	downstream_gene_variant
chr1	88257928	A	G	1091	43	0.744186	2	0,9,4,30	MODIFIER	MODIFIER	NONE	NONE	downstream_gene_variant
chr1	88258356	T	C	231	13	0.538462	0	5,0,8,0	MODIFIER	MODIFIER	MODIFIER	NONE	NONE
chr1	88258358	G	T	142	17	0.294118	0	10,0,7,0	MODIFIER	MODIFIER	MODIFIER	NONE	NONE
chr1	88258376	G	A	113	27	0.148148	0	23,0,4,0	MODIFIER	MODIFIER	MODIFIER	NONE	NONE
chr1	88258407	TGCC	T	169	60	0.1	0	54,0,6,0	MODIFIER	MODIFIER	MODIFIER	NONE	NONE
chr1	88258408	GCCC	G	153	61	0.180328	0	41,0,11,0	MODIFIER	MODIFIER	MODIFIER	NONE	NONE
chr1	88258421	C	A	135	71	0.352113	0	24,0,32,1	MODIFIER	MODIFIER	MODIFIER	NONE	NONE
chr1	88258457	G	C	529	160	0.1375	0	137,1,22,0	MODIFIER	MODIFIER	MODIFIER	NONE	NONE
chr1	88258460	T	C	589	165	0.139394	0	142,0,23,0	MODIFIER	MODIFIER	MODIFIER	NONE	NONE
chr1	88258476	C	T	784	225	0.137778	0	192,2,31,0	MODIFIER	MODIFIER	MODIFIER	NONE	NONE
chr1	88258485	A	G	765	262	0.122137	0	224,5,33,0	MODIFIER	MODIFIER	MODIFIER	NONE	NONE
chr1	88258500	G	C	3495	337	0.364985	5	197,15,112,13	MODIFIER	MODIFIER	MODIFIER	NONE	NONE
chr1	88258508	C	A	1483	388	0.157216	5	282,43,58,5	MODIFIER	MODIFIER	MODIFIER	NONE	NONE
chr1	88258538	G	C	1499	564	0.115248	0	375,122,51,16	MODIFIER	MODIFIER	MODIFIER	NONE	NONE
chr1	88258551	C	A	1371	607	0.100494	1	379,163,42,21	MODIFIER	MODIFIER	MODIFIER	NONE	NONE
chr1	88258552	C	G	1400	616	0.102273	1	378,172,44,22	MODIFIER	MODIFIER	MODIFIER	NONE	NONE
chr1	88258633	C	T	5501	693	0.287157	2	200,288,89,116	LOW	MODIFIER	MODIFIER	NONE	NONE
chr1	88258664	A	G	2225	632	0.143987	0	188,350,33,61	MODERATE	MODIFIER	MODIFIER	NONE	NONE
chr1	88258708	C	T	2033	490	0.165306	0	125,282,27,56	LOW	MODIFIER	MODIFIER	NONE	NONE
chr1	88258723	A	G	11330	432	0.775463	1	25,60,93,254	MODIFIER	MODIFIER	MODIFIER	NONE	NONE
chr1	88258729	T	TG	74	395	0.121519	2	85,253,10,38	MODIFIER	MODIFIER	MODIFIER	NONE	NONE
chr1	88258731	A	AG	716	386	0.272021	7	74,191,22,83	MODIFIER	MODIFIER	MODIFIER	NONE	NONE
chr1	88258731	A	AGGGG	149	386	0.051813	0	74,191,5,15	MODIFIER	MODIFIER	MODIFIER	NONE	NONE
chr1	88258731	A	G	3766	394	0.781726	1	19,51,82,242	MODIFIER	MODIFIER	MODIFIER	NONE	NONE
chr1	88258743	T	A	3259	318	0.345912	0	41,162,22,93	MODIFIER	MODIFIER	MODIFIER	NONE	NONE
chr1	88258754	C	G	2530	259	0.339768	2	32,135,15,77	MODIFIER	MODIFIER	MODIFIER	NONE	NONE
chr1	88258759	T	C	454	250	0.088	2	36,190,5,19	MODIFIER	MODIFIER	MODIFIER	NONE	NONE
chr1	88258848	A	G	124	58	0.103448	0	3,49,0,6	MODIFIER	MODIFIER	MODIFIER	NONE	NONE
chr1	88259005	A	G	232	27	0.296296	0	15,4,7,1	MODIFIER	MODIFIER	MODIFIER	NONE	NONE
chr1	88259220	G	A	1034	405	0.111111	0	168,189,22,26	LOW	MODIFIER	MODIFIER	NONE	NONE
chr1	88259277	G	T	537	257	0.097276	0	57,171,7,22	MODIFIER	MODIFIER	MODIFIER	NONE	NONE
chr1	88259318	C	T	852	170	0.194118	4	37,97,7,29	MODIFIER	MODIFIER	MODIFIER	NONE	NONE
chr1	88259369	C	T	2127	165	0.424242	7	63,31,40,31	MODIFIER	MODIFIER	MODIFIER	NONE	NONE
chr1	88259370	C	G	4256	161	0.757764	15	28,7,75,51	MODIFIER	MODIFIER	MODIFIER	NONE	NONE
chr1	88259427	C	T	1275	286	0.174825	4	216,19,49,2	MODIFIER	MODIFIER	MODIFIER	NONE	NONE
chr1	88259436	G	C	2897	329	0.303951	5	203,21,99,6	MODIFIER	MODIFIER	MODIFIER	NONE	NONE
chr1	88259483	C	T	2312	638	0.147335	0	414,122,80,22	MODIFIER	MODIFIER	MODIFIER	NONE	NONE
chr1	88259499	T	A	2755	789	0.145754	0	471,196,86,36	MODIFIER	MODIFIER	MODIFIER	NONE	NONE
chr1	88259537	T	C	3679	1025	0.143415	7	490,383,74,74	LOW	MODIFIER	MODIFIER	NONE	NONE
chr1	88259567	A	G	26482	1013	0.757157	0	100129346438	LOW	MODIFIER	MODIFIER	NONE	NONE
chr1	88259589	C	T	3146	900	0.14	11	284,488,36,91	MODERATE	MODIFIER	MODIFIER	NONE	NONE
chr1	88259607	T	C	2327	756	0.130952	7	196,460,23,77	MODIFIER	MODIFIER	MODIFIER	NONE	NONE
chr1	88259678	A	G	7566	271	0.800738	13	0,50,16,204	MODIFIER	MODIFIER	MODIFIER	NONE	NONE
chr1	88259696	G	C	503	205	0.102439	8	10,173,3,19	MODIFIER	MODIFIER	MODIFIER	NONE	NONE
chr1	88259741	G	C	573	124	0.177419	7	19,81,8,16	MODIFIER	MODIFIER	MODIFIER	NONE	NONE
chr1	88259793	A	G	2970	101	0.841584	12	5,11,49,36	MODIFIER	MODIFIER	MODIFIER	NONE	NONE
chr1	88259818	G	GA	309	115	0.095652	1	64,42,6,5	MODIFIER	MODIFIER	MODIFIER	NONE	NONE
chr1	88259973	C	T	814	192	0.166667	0	89,71,17,15	LOW	MODIFIER	MODIFIER	MODIFIER	NONE
chr1	88260002	A	C	49314	155	0.083871	5	21,9,7,7	MODERATE	MODIFIER	MODIFIER	MODIFIER	NONE
chr1	88260002	A	G	3509	155	0.696774	5	21,9,64,47	LOW	MODIFIER	MODIFIER	MODIFIER	NONE
chr1	88260003	G	T	251	151	0.07947	3	84,53,7,7	MODERATE	MODIFIER	MODIFIER	MODIFIER	NONE
chr1	88260004	C	T	1215	150	0.293333	6	66,37,25,22	MODERATE	MODIFIER	MODIFIER	MODIFIER	NONE
chr1	88260005	G	A	1294	149	0.315436	5	65,36,26,22	LOW	MODIFIER	MODIFIER	MODIFIER	NONE
chr1	88260044	G	A	201	111	0.09009	0	50,49,6,6	MODIFIER	MODIFIER	MODIFIER	MODIFIER	NONE
chr1	88260048	T	A	494	112	0.178571	1	43,44,11,14	MODIFIER	MODIFIER	MODIFIER	MODIFIER	NONE
chr1	88260056	C	T	422	97	0.175258	1	29,41,9,17	MODIFIER	MODIFIER	MODIFIER	MODIFIER	NONE
chr1	88260112	G	A	413	81	0.185185	0	1,65,0,15	MODIFIER	MODIFIER	MODIFIER	MODIFIER	NONE
chr1	88264977	C	T	149	10	0.5	0	4,1,3,2	MODIFIER	MODIFIER	MODIFIER	MODIFIER	NONE
chr1	88265019	G	A	184	16	0.375	2	9,1,4,2	MODIFIER	MODIFIER	MODIFIER	MODIFIER	NONE
chr1	88265028	A	G	186	15	0.4	8	9,0,4,2	MODIFIER	MODIFIER	MODIFIER	MODIFIER	NONE
chr1	88265034	G	A	116	15	0.266667	0	9,2,4,0	MODIFIER	MODIFIER	MODIFIER	MODIFIER	NONE
chr1	88265097	T	C	156	43	0.139535	0	34,3,6,0	MODIFIER	MODIFIER	MODIFIER	MODIFIER	NONE
chr1	88265108	T	C	246	50	0.18	0	38,3,9,0	MODIFIER	MODIFIER	MODIFIER	MODIFIER	NONE
chr1	88265122	G	A	1163	61	0.57377	8	25,0,32,4	MODIFIER	MODIFIER	MODIFIER	MODIFIER	NONE
chr1	88265148	AACAG	A	492	105	0.152381	1	80,9,14,2	MODIFIER	MODIFIER	MODIFIER	MODIFIER	NONE
chr1	88265161	G	C	502	128	0.15625	8	97,11,15,5	MODIFIER	MODIFIER	MODIFIER	MODIFIER	NONE
chr1	88265175	G	T	559	164	0.140244	7	113,27,16,8	MODIFIER	MODIFIER	MODIFIER	MODIFIER	NONE
chr1	88265185	G	A	457	174	0.114943	5	119,35,18,2	MODERATE	MODERATE	MODIFIER	MODIFIER	NONE
chr1	88265210	C	T	541	223	0.103139	5	144,52,17,10	MODERATE	MODERATE	MODIFIER	MODIFIER	NONE
chr1	88265215	A	G	624	244	0.110656	7	158,58,17,11	MODERATE	MODERATE	MODIFIER	MODIFIER	NONE
chr1	88265217	C	T	614	245	0.106122	5	157,59,18,11	LOW	LOW	MODIFIER	MODIFIER	NONE
chr1	88265258	A	G	9002	348	0.744253	8	45,30,190,83	MODERATE	MODERATE	MODIFIER	MODIFIER	NONE
chr1	88265271	C	A	1162	371	0.12938	9	204,118,37,12	LOW	LOW	MODIFIER	MODIFIER	NONE
chr1	88265279	A	G	1128	388	0.121134	15	206,133,38,11	MODERATE	MODERATE	MODIFIER	MODIFIER	NONE
chr1	88265280	G	C	1125	387	0.121447	14	205,133,37,11	MODERATE	MODERATE	MODIFIER	MODIFIER	NONE
chr1	88265309	C	G	5696	445	0.426966	12	135,115,123,71	MODERATE	MODERATE	MODIFIER	MODIFIER	NONE
chr1	88265472	C	T	2628	323	0.297214	3	98,126,48,51	LOW	LOW	MODIFIER	MODIFIER	NONE
chr1	88265570	T	A	9325	373	0.729223	5	50,43,169,111	MODERATE	MODERATE	MODIFIER	MODIFIER	NONE
chr1	88265673	C	A	1479	494	0.125506	2	232,198,38,26	LOW	LOW	MODIFIER	MODIFIER	NONE
chr1	88265846	A	C	3699	457	0.295405	1	156,163,64,74	MODERATE	MODERATE	MODIFIER	MODIFIER	NONE
chr1	88265892	C	G	1548	448	0.140625	11	187,198,23,40	LOW	LOW	MODIFIER	MODIFIER	NONE
chr1	88265980	T	G	10362	505	0.629703	4	99,80,194,131	MODERATE	MODERATE	MODIFIER	MODIFIER	NONE
chr1	88266046	A	C	2133	573	0.151832	0	246,236,46,44	MODERATE	MODERATE	MODIFIER	MODIFIER	NONE
chr1	88266121	G	A	2321	573	0.164049	2	198,277,44,54	MODERATE	MODERATE	MODIFIER	MODIFIER	NONE
chr1	88266159	G	A	105	518	0.013514	1	205,303,3,7	LOW	LOW	MODIFIER	MODIFIER	NONE
chr1	88266195	G	A	3833	463	0.295896	2	138,185,63,76	LOW	LOW	MODIFIER	MODIFIER	NONE
chr1	88266241	G	T	1197	419	0.124105	3	200,166,26,27	MODERATE	MODERATE	MODIFIER	MODIFIER	NONE
chr1	88266255	C	T	1167	405	0.123457	3	184,166,26,29	LOW	LOW	MODIFIER	MODIFIER	NONE
chr1	88266281	G	T	177	150	0.086667	2	55,81,4,10	MODERATE	MODERATE	LOW	MODIFIER	NONE
chr1	88266328	TG	T	109	127	0.047244	4	39,88,3,3	HIGH	HIGH	HIGH	MODIFIER	NONE
chr1	88266400	G	A	935	347	0.112392	0	129,179,17,22	MODERATE	MODERATE	MODIFIER	MODIFIER	NONE
chr1	88266452	C	T	847	283	0.123675	8	98,149,19,17	MODERATE	MODERATE	MODIFIER	MODIFIER	NONE
chr1	88266524	G	GT	2588	270	0.318519	0	93,91,43,43	HIGH	HIGH	MODIFIER	MODIFIER	NONE
chr1	88266561	A	G	834	262	0.133588	2	100,124,15,23	LOW	LOW	MODIFIER	MODIFIER	NONE
chr1	88266592	C	A	710	228	0.127193	0	86,109,14,19	MODERATE	MODERATE	LOW	MODIFIER	NONE
chr1	88266616	T	C	860	222	0.153153	2	79,109,12,22	MODERATE	MODERATE	MODIFIER	MODIFIER	NONE
chr1	88266696	T	C	3842	149	0.785235	0	5,24,23,97	MODIFIER	MODIFIER	MODIFIER	MODIFIER	NONE
chr1	88266708	A	G	200	120	0.075	1	19,91,2,8	MODIFIER	MODIFIER	MODIFIER	MODIFIER	NONE
chr1	88267758	TATCA	T	88	20	0.15	0	17,0,3,0	MODIFIER	MODIFIER	MODIFIER	NONE	NONE
chr1	88267831	C	A	718	91	0.274725	0	66,0,25,0	MODIFIER	MODIFIER	MODIFIER	NONE	NONE
chr1	88267879	T	C	5304	183	0.846995	0	27,1,147,8	MODIFIER	MODIFIER	MODIFIER	NONE	NONE
chr1	88267915	A	C	1087	275	0.16	0	176,54,34,11	MODIFIER	MODIFIER	MODIFIER	NONE	NONE
chr1	88268037	A	G	1692	380	0.173684	6	83,227,23,45	MODIFIER	MODIFIER	MODIFIER	NONE	NONE
chr1	88268102	A	G	704	143	0.181818	4	1,114,1,27	MODIFIER	MODIFIER	MODIFIER	NONE	NONE
chr1	88268150	C	T	419	63	0.238095	0	1,46,0,16	MODIFIER	MODIFIER	MODIFIER	NONE	NONE
chr1	88268173	A	G	299	41	0.268293	0	0,29,0,12	MODIFIER	MODIFIER	MODIFIER	NONE	NONE
chr1	88269125	T	C	599	30	0.6	0	11,0,19,0	MODIFIER	MODIFIER	MODIFIER	NONE	NONE
chr1	88269170	A	G	219	63	0.142857	0	53,1,9,0	MODIFIER	MODIFIER	MODIFIER	NONE	NONE
chr1	88269242	T	C	993	200	0.19	6	148,14,32,6	MODIFIER	MODIFIER	MODIFIER	NONE	NONE
chr1	88269283	A	C	1444	350	0.162857	2	216,77,44,13	MODIFIER	MODIFIER	MODIFIER	NONE	NONE
chr1	88269285	C	T	8559	358	0.706704	4	69,30,194,65	MODIFIER	MODIFIER	MODIFIER	NONE	NONE
chr1	88269331	T	C	5978	570	0.352632	1	215,148,125,81	MODERATE	MODIFIER	MODIFIER	NONE	NONE
chr1	88269512	T	TA	1016	110	0.272727	0	1,83,0,30	MODIFIER	MODIFIER	MODIFIER	NONE	NONE
chr1	88269595	A	T	962	32	0.84375	0	0,5,0,27	MODIFIER	MODIFIER	MODIFIER	NONE	NONE
chr1	88270055	A	G	383	26	0.461538	0	9,0,17,0	MODIFIER	MODIFIER	MODIFIER	NONE	NONE
chr1	88270078	T	C	892	44	0.590909	0	16,0,28,0	MODIFIER	MODIFIER	MODIFIER	NONE	NONE
chr1	88270169	A	G	3963	186	0.650538	2	51,11,97,27	MODIFIER	MODIFIER	MODIFIER	NONE	NONE
chr1	88270170	A	G	4063	189	0.656085	3	51,11,98,29	MODIFIER	MODIFIER	MODIFIER	NONE	NONE
chr1	88270269	A	G	3789	291	0.426117	15	48,112,24,107	MODERATE	MODIFIER	MODIFIER	NONE	NONE
chr1	88270274	C	T	5661	275	0.621818	23	32,65,31,146	LOW	MODIFIER	MODIFIER	NONE	NONE
chr1	88270304	A	AAGC	2650	142	0.521127	20	13,60,3,71	LOW	MODIFIER	MODIFIER	NONE	NONE
chr1	88272523	A	T	1010	44	0.681818	0	9,0,35,0	MODIFIER	MODIFIER	MODIFIER	NONE	NONE
chr1	88272537	A	C	1729	64	0.796875	0	11,0,53,0	MODIFIER	MODIFIER	MODIFIER	NONE	NONE
chr1	88272552	G	A	2689	99	0.787879	0	17,0,82,0	MODIFIER	MODIFIER	MODIFIER	NONE	NONE
chr1	88272578	C	T	4379	162	0.765432	0	34,0,127,0	MODIFIER	MODIFIER	MODIFIER	NONE	NONE
chr1	88272594	A	C	5744	207	0.772947	0	43,0,164,0	MODIFIER	MODIFIER	MODIFIER	NONE	NONE
chr1	88272630	C	T	1781	316	0.208861	4	224,24,58,9	MODIFIER	MODIFIER	MODIFIER	NONE	NONE
chr1	88272649	G	C	8570	377	0.710875	1	79,16,228,53	MODIFIER	MODIFIER	MODIFIER	NONE	NONE
chr1	88272667	C	T	1331	452	0.126106	9	281,112,48,11	MODIFIER	MODIFIER	MODIFIER	NONE	NONE
chr1	88272675	T	C	11729	486	0.72428	1	87,38,243,118	MODIFIER	MODIFIER	MODIFIER	NONE	NONE
chr1	88272689	T	C	12718	543	0.709024	9	100,50,232,161	MODIFIER	MODIFIER	MODIFIER	NONE	NONE
chr1	88272730	A	G	14739	636	0.685535	1	85,92,211,247	LOW	MODIFIER	MODIFIER	NONE	NONE
chr1	88272802	A	C	7457	369	0.634146	2	15,87,48,218	MODIFIER	MODIFIER	MODIFIER	NONE	NONE
chr1	88272805	G	A	7456	355	0.639437	2	14,83,45,211	MODIFIER	MODIFIER	MODIFIER	NONE	NONE
chr1	88272823	T	A	6640	267	0.722846	6	3,65,20,177	MODIFIER	MODIFIER	MODIFIER	NONE	NONE
chr1	88272881	A	T	347	93	0.150538	0	0,79,0,14	MODIFIER	MODIFIER	MODIFIER	NONE	NONE
chr1	88272883	C	A	1970	90	0.644444	0	0,30,0,60	MODIFIER	MODIFIER	MODIFIER	NONE	NONE
chr1	88272931	A	C	1092	37	0.810811	0	0,6,0,31	MODIFIER	MODIFIER	MODIFIER	NONE	NONE
chr1	88272948	G	A	763	27	0.777778	0	0,5,0,22	MODIFIER	MODIFIER	MODIFIER	NONE	NONE
chr1	88274819	C	G	632	25	0.72	0	6,0,19,0	MODIFIER	MODIFIER	NONE	NONE	intron_variant
chr1	88274858	G	T	310	46	0.23913	0	34,0,12,0	MODIFIER	MODIFIER	NONE	NONE	intron_variant
chr1	88274914	G	GGGTAA	578	129	0.147287	0	111,0,19,0	MODIFIER	MODIFIER	NONE	NONE	intron_variant
chr1	88274928	G	A	1295	154	0.305195	0	104,1,49,0	MODIFIER	MODIFIER	NONE	NONE	intron_variant
chr1	88274942	A	G	4423	185	0.718919	5	46,2,135,2	MODIFIER	MODIFIER	NONE	NONE	intron_variant
chr1	88274965	G	T	714	259	0.119691	0	198,28,29,4	MODIFIER	MODIFIER	NONE	NONE	intron_variant
chr1	88275012	C	T	1358	418	0.136364	0	258,101,42,17	MODIFIER	MODIFIER	NONE	NONE	intron_variant
chr1	88275050	A	T	2135	605	0.14876	41	278,234,29,63	MODERATE	MODERATE	NONE	NONE	missense_variant
chr1	88275134	G	T	7743	306	0.738562	2	13,63,48,182	MODIFIER	MODIFIER	NONE	NONE	intron_variant
chr1	88275143	G	A	5692	244	0.717213	0	11,53,32,147	MODIFIER	MODIFIER	NONE	NONE	intron_variant
chr1	88275145	A	G	5646	238	0.714286	0	11,53,31,143	MODIFIER	MODIFIER	NONE	NONE	intron_variant
chr1	88275190	G	A	3404	136	0.75	2	1,32,2,101	MODIFIER	MODIFIER	NONE	NONE	intron_variant
chr1	88275204	C	T	580	126	0.174603	0	2,101,0,23	MODIFIER	MODIFIER	NONE	NONE	intron_variant
chr1	88275231	C	T	2302	86	0.755814	0	0,19,0,67	MODIFIER	MODIFIER	NONE	NONE	intron_variant
chr1	88275265	TA	T	496	36	0.5	0	0,19,0,18	MODIFIER	MODIFIER	NONE	NONE	intron_variant
chr1	88275363	C	G	292	10	0.8	0	0,2,0,8	MODIFIER	MODIFIER	NONE	NONE	intron_variant
chr1	88277152	A	G	2766	93	0.849462	10	10,3,75,5	MODIFIER	MODIFIER	NONE	NONE	intron_variant
chr1	88277167	T	C	1812	120	0.491667	0	50,10,52,8	MODIFIER	MODIFIER	NONE	NONE	intron_variant
chr1	88277179	T	C	2255	141	0.524823	0	53,11,62,15	MODIFIER	MODIFIER	NONE	NONE	intron_variant
chr1	88277188	C	G	4157	157	0.78344	2	20,7,103,27	MODIFIER	MODIFIER	NONE	NONE	intron_variant
chr1	88277215	G	C	862	183	0.185792	1	100,48,22,13	LOW	LOW	NONE	NONE	splice_region_variant&intron_variant
chr1	88277220	C	T	416	193	0.098446	0	108,64,13,7	HIGH	LOW	NONE	NONE	splice_donor_variant&intron_variant
chr1	88277238	T	C	5394	213	0.774648	2	25,17,92,79	LOW	LOW	NONE	NONE	synonymous_variant
chr1	88277245	C	G	538	217	0.115207	0	100,90,14,13	MODERATE	MODERATE	NONE	NONE	missense_variant
chr1	88277304	T	G	3860	151	0.781457	7	14,15,41,81	MODIFIER	MODIFIER	NONE	NONE	intron_variant
chr1	88277368	G	A	587	152	0.157895	4	61,67,14,10	LOW	LOW	NONE	NONE	splice_region_variant&intron_variant
chr1	88277410	G	A	304	140	0.1	1	64,62,8,6	LOW	LOW	NONE	NONE	synonymous_variant
chr1	88277413	A	C	580	142	0.176056	3	22,25,15,11	MODERATE	MODERATE	NONE	NONE	missense_variant
chr1	88277413	A	T	1514	142	0.380282	2	22,25,37,32	MODERATE	MODERATE	NONE	NONE	missense_variant
chr1	88277422	C	A	2519	132	0.598485	4	20,23,50,39	MODERATE	MODERATE	NONE	NONE	missense_variant
chr1	88277434	A	C	529	123	0.178862	4	50,50,14,9	MODERATE	MODERATE	NONE	NONE	missense_variant
chr1	88277442	T	A	1451	119	0.420168	3	32,27,28,32	MODERATE	MODERATE	NONE	NONE	missense_variant
chr1	88277475	A	G	1778	97	0.608247	5	10,24,12,51	MODIFIER	MODIFIER	NONE	NONE	5_prime_UTR_variant
chr1	88277507	A	G	1404	74	0.621622	18	5,20,1,48	MODIFIER	MODIFIER	NONE	NONE	5_prime_UTR_variant
chr1	88277525	A	G	1315	61	0.688525	10	2,16,0,43	LOW	LOW	MODIFIER	MODIFIER	NONE
chr1	88277537	C	A	92	55	0.072727	0	0,51,0,4	LOW	LOW	MODIFIER	MODIFIER	NONE
chr1	88294640	G	A	437	15	0.866667	5	1,0,3,11	MODIFIER	NONE	intergenic_region	Hjurp-Trpm8	n.88294640G>A
chr1	88326590	G	A	530	63	0.301587	6	16,27,4,16	LOW	NONE	splice_region_variant&intron_variant	Trpm8	c.526+8G>A
chr1	88360441	CGTGT	C	97	13	0.230769	0	8,0,3,0	MODIFIER	NONE	intron_variant	Trpm8	c.2448-143_2448-140delGTGT
chr1	88380863	GCA	G	87	56	0.053571	0	49,4,3,0	MODIFIER	NONE	intron_variant	Trpm8	c.3231-105_3231-104delCA
chr1	88384526	CCA	C	172	21	0.238095	0	15,0,5,0	MODIFIER	NONE	intron_variant	Trpm8	c.3265-136_3265-135delCA
chr1	88722576	GC	G	635	50	0.38	2	11,20,9,10	MODIFIER	NONE	intergenic_region	Arl4c-Platr5	n.88722577delC
chr1	89743905	G	T	219	18	0.388889	0	2,9,1,6	MODIFIER	MODIFIER	NONE	NONE	intron_variant
chr1	90795137	T	TTC	161	34	0.147059	0	2,26,0,5	MODIFIER	MODIFIER	NONE	NONE	intron_variant
chr1	90822423	CA	C	76	55	0.145455	22	24,20,0,8	MODIFIER	MODIFIER	NONE	NONE	intron_variant
chr1	91084744	GGT	G	172	18	0.277778	5	11,0,4,1	MODIFIER	MODIFIER	MODIFIER	MODIFIER	NONE
chr1	91101408	T	C	349	35	0.342857	0	1,21,0,13	MODIFIER	MODIFIER	MODIFIER	MODIFIER	NONE
chr1	91225127	TG	T	117	68	0.132353	80	3,52,9,0	MODIFIER	NONE	3_prime_UTR_variant	Ramp1	c.*1778delG
chr1	91275195	CT	C	96	17	0.352941	0	10,1,6,0	MODIFIER	NONE	intron_variant	Ube2f	c.215-54delT
chr1	91276354	CCT	C	189	52	0.115385	12	44,2,4,2	MODIFIER	NONE	intron_variant	Ube2f	c.283-31_283-30delCT
chr1	91317536	GGTGTGTGTGTGTGTGT	G	272	37	0.216216	0	26,1,8,0	MODIFIER	MODIFIER	NONE	NONE	upstream_gene_variant
chr1	91381992	A	G	693	76	0.315789	0	18,32,9,17	MODIFIER	NONE	intron_variant	Ilkap	c.715-20T>C
chr1	91424649	G	A	96	10	0.3	0	0,7,0,3	MODIFIER	NONE	intron_variant	Per2	c.2297-163C>T
chr1	91431144	GA	G	308	69	0.275362	13	22,28,3,16	LOW	NONE	splice_region_variant&intron_variant	Per2	c.1622-5delT
chr1	92512129	GA	G	109	17	0.352941	0	0,12,0,6	MODIFIER	NONE	intron_variant	Olfr1414	c.-10-94delT
chr1	92645081	C	T	125	23	0.217391	7	16,2,3,2	MODIFIER	MODIFIER	MODIFIER	NONE	NONE
chr1	92886413	ACG	A	82	26	0.115385	0	0,24,0,3	MODIFIER	NONE	intron_variant	Ankmy1	c.1162-121_1162-120delCG
chr1	93295552	TAC	T	110	10	0.3	0	7,0,3,0	MODIFIER	NONE	intron_variant	Sned1	c.4119-167_4119-166delAC
chr1	93306632	GGTTT	G	560	34	0.441176	0	19,0,15,0	MODIFIER	MODIFIER	MODIFIER	MODIFIER	NONE
chr1	93408342	C	T	839	147	0.210884	1	80,35,21,11	MODIFIER	MODIFIER	MODIFIER	MODIFIER	NONE
chr1	95498829	A	C	530	77	0.25974	0	26,31,9,11	MODIFIER	NONE	intergenic_region	Fam174a-St8sia4	n.95498829A>C
chr1	95627550	G	A	767	63	0.412698	3	20,16,12,15	HIGH	HIGH	NONE	NONE	stop_gained
chr1	96818884	T	G	465	52	0.307692	0	25,6,17,3	MODIFIER	NONE	3_prime_UTR_variant	Slco4c1	c.*63A>C
chr1	96832225	C	G	244	28	0.285714	0	2,18,1,7	MODIFIER	NONE	intron_variant	Slco4c1	c.1467-86G>C
chr1	96995294	T	G	319	47	0.234043	3	7,28,4,8	MODIFIER	NONE	intron_variant	Slco6b1	n.440-10A>C
chr1	97087719	TAC	T	103	15	0.2	0	12,0,3,0	MODIFIER	NONE	intron_variant	Slco6c1	c.1243+152_1243+153delGT
chr1	97777347	G	A	812	82	0.341463	0	33,19,20,10	MODERATE	MODERATE	NONE	NONE	missense_variant
chr1	97831419	T	G	1810	204	0.313726	2	94,43,49,18	MODIFIER	NONE	intron_variant	Pam	c.2503+36A>C
chr1	98421183	C	A	216	22	0.318182	0	11,4,6,1	MODIFIER	MODIFIER	NONE	NONE	5_prime_UTR_variant
chr1	98499655	AGT	A	101	17	0.176471	0	15,0,3,0	MODIFIER	MODIFIER	NONE	NONE	intron_variant
chr1	98507534	C	A	2707	305	0.311475	4	102,107,53,43	HIGH	MODIFIER	NONE	NONE	stop_gained
chr1	99773011	T	A	89	14	0.214286	0	1,10,0,3	MODIFIER	NONE	intron_variant	Cntnap5b	c.82+165T>A
chr1	100141145	C	CT	742	124	0.306452	1	75,10,33,5	MODIFIER	NONE	intron_variant	Cntnap5b	c.1060-29_1060-28insT
chr1	100282132	CT	C	117	37	0.243243	0	22,1,9,0	MODIFIER	NONE	intron_variant	Cntnap5b	c.2074+7572delT
chr1	100369679	AG	A	225	42	0.285714	7	30,1,10,2	MODIFIER	NONE	intron_variant	Cntnap5b	c.2193-77delG
chr1	100379035	A	AT	81	122	0.057377	2	95,21,7,0	MODIFIER	NONE	intron_variant	Cntnap5b	c.2492-16_2492-15insT
chr1	100446694	C	CAG	78	43	0.069767	0	40,0,3,0	MODIFIER	NONE	intron_variant	Cntnap5b	c.3307-140_3307-139insAG
chr1	101386227	A	C	469	54	0.296296	1	20,17,10,7	MODIFIER	NONE	intergenic_region	Gm20268-Cdh20	n.101386227A>C
chr1	102506827	A	C	632	67	0.328358	0	16,28,8,15	MODIFIER	NONE	intergenic_region	Gm20268-Cdh20	n.102506827A>C
chr1	104514113	CT	C	82	11	0.363636	4	0,7,1,3	MODIFIER	NONE	intergenic_region	Gm20268-Cdh20	n.104514114delT
chr1	104984633	AT	A	241	26	0.461538	5	13,1,9,3	MODIFIER	NONE	intron_variant	Cdh20	c.1649-37delT
chr1	105691965	A	T	183	188	0.047872	0	90,89,5,4	MODERATE	MODERATE	NONE	NONE	missense_variant
chr1	105695386	A	ATC	99	177	0.022599	2	146,30,3,1	MODIFIER	MODIFIER	NONE	NONE	intron_variant
chr1	105695386	ATC	A	441	177	0.084746	5	138,27,11,4	MODIFIER	MODIFIER	NONE	NONE	intron_variant
chr1	105813726	G	T	425	59	0.271186	0	19,22,9,9	MODERATE	NONE	missense_variant	Tnfrsf11a	c.362G>T
chr1	106774222	T	A	121	13	0.307692	4	0,8,1,4	MODIFIER	NONE	intron_variant	Vps4b	c.1093-75A>T
chr1	106888632	C	A	292	44	0.25	2	15,17,4,8	MODIFIER	NONE	intergenic_region	Serpinb5-Serpinb12	n.106888632C>A
chr1	107000626	C	A	775	84	0.321429	0	38,19,19,8	LOW	NONE	synonymous_variant	Serpinb13	c.975C>A
chr1	107081474	GTCTA	G	100	15	0.2	0	12,0,3,0	MODIFIER	NONE	intron_variant	Serpinb3d	c.342+104_342+107delTAGA
chr1	107082722	G	T	1091	134	0.283582	0	59,37,23,15	MODIFIER	NONE	intron_variant	Serpinb3d	c.219+16C>A
chr1	107434810	GA	G	353	60	0.316667	1	9,34,5,14	MODIFIER	NONE	intron_variant	Serpinb7	c.219+25delA
chr1	115684943	G	GT	156	28	0.321429	0	16,0,9,0	MODIFIER	MODIFIER	NONE	NONE	upstream_gene_variant
chr1	115900872	TA	T	489	91	0.351648	3	52,3,28,4	MODIFIER	NONE	intron_variant	Cntnap5a	c.83-57delA
chr1	116089289	T	C	1209	126	0.325397	0	40,45,19,22	MODERATE	NONE	missense_variant	Cntnap5a	c.611T>C
chr1	116221923	T	G	1267	184	0.271739	4	54,70,21,39	LOW	NONE	synonymous_variant	Cntnap5a	c.1728T>G
chr1	116630538	T	C	111	18	0.222222	0	9,4,3,2	MODIFIER	NONE	intergenic_region	Cntnap5a-Tsn	n.116630538T>C
chr1	116634058	CGAT	C	142	16	0.25	2	3,8,2,2	MODIFIER	NONE	intergenic_region	Cntnap5a-Tsn	n.116634059_116634061delGAT
chr1	116968730	A	C	87	14	0.214286	0	6,5,1,2	MODIFIER	NONE	intergenic_region	Cntnap5a-Tsn	n.116968730A>C
chr1	117561057	C	A	156	24	0.291667	0	15,2,7,0	MODIFIER	NONE	intergenic_region	Cntnap5a-Tsn	n.117561057C>A
chr1	117561069	C	G	182	27	0.296296	5	15,4,8,0	MODIFIER	NONE	intergenic_region	Cntnap5a-Tsn	n.117561069C>G
chr1	117561102	A	T	436	57	0.333333	4	24,12,17,4	MODIFIER	NONE	intergenic_region	Cntnap5a-Tsn	n.117561102A>T
chr1	117561138	C	T	520	64	0.34375	0	28,13,16,7	MODIFIER	NONE	intergenic_region	Cntnap5a-Tsn	n.117561138C>T
chr1	117561165	T	A	537	58	0.396552	2	21,14,12,11	MODIFIER	NONE	intergenic_region	Cntnap5a-Tsn	n.117561165T>A
chr1	117561178	C	T	486	55	0.4	9	19,12,9,15	MODIFIER	NONE	intergenic_region	Cntnap5a-Tsn	n.117561178C>T
chr1	117561192	G	T	441	48	0.395833	14	15,12,5,16	MODIFIER	NONE	intergenic_region	Cntnap5a-Tsn	n.117561192G>T
chr1	117561258	C	T	224	27	0.333333	2	3,15,0,9	MODIFIER	NONE	intergenic_region	Cntnap5a-Tsn	n.117561258C>T
chr1	117750467	A	G	479	39	0.384615	0	20,4,13,2	MODIFIER	NONE	intergenic_region	Cntnap5a-Tsn	n.117750467A>G
chr1	118250979	T	C	327	19	0.526316	0	0,9,1,9	MODIFIER	NONE	intergenic_region	Cntnap5a-Tsn	n.118250979T>C
chr1	118499625	CT	C	162	43	0.27907	0	24,2,12,0	MODIFIER	MODIFIER	MODIFIER	NONE	NONE
chr1	118664615	A	C	161	15	0.333333	0	10,0,5,0	MODIFIER	NONE	intron_variant	Tfcp2l1	c.861-144A>C
chr1	119158356	C	T	1368	124	0.379032	7	35,42,15,32	MODIFIER	NONE	intergenic_region	Gli2-Inhbb	n.119158356C>T
chr1	119242318	TTG	T	148	69	0.072464	0	17,47,1,4	MODIFIER	NONE	intergenic_region	Gli2-Inhbb	n.119242319_119242320delTG
chr1	119572921	GGA	G	73	33	0.090909	0	6,24,0,3	MODIFIER	NONE	intron_variant	Epb41l5	c.1499-20_1499-19delTC
chr1	119936198	AAC	A	428	73	0.219178	2	5,54,0,16	MODIFIER	NONE	intron_variant	Cfap221	c.1642-29_1642-28delGT
chr1	119954086	CGT	C	267	130	0.076923	0	85,31,8,2	MODIFIER	NONE	intron_variant	Cfap221	c.909+60_909+61delAC
chr1	119954086	CGTGT	C	70	130	0.023077	2	85,31,3,0	MODIFIER	NONE	intron_variant	Cfap221	c.909+58_909+61delACAC
chr1	119990294	C	T	110	12	0.416667	0	5,1,4,2	MODIFIER	NONE	intron_variant	Cfap221	c.140-764G>A
chr1	120073538	ACC	A	70	14	0.285714	0	9,0,4,0	MODIFIER	NONE	intron_variant	Tmem37	c.21+172_21+173delGG
chr1	120342560	C	T	480	48	0.354167	1	14,16,7,11	LOW	NONE	synonymous_variant	C1ql2	c.850C>T
chr1	121527646	AC	A	339	32	0.34375	3	9,13,6,5	HIGH	NONE	frameshift_variant	Htr5b	c.543delG
chr1	121528201	T	G	259	25	0.36	0	5,11,3,6	MODIFIER	NONE	5_prime_UTR_variant	Htr5b	c.-12A>C
chr1	121566155	T	A	691	114	0.22807	3	22,65,9,18	LOW	NONE	synonymous_variant	Ddx18	c.99A>T
chr1	123367886	A	C	598	62	0.322581	4	2,36,3,20	MODIFIER	NONE	intron_variant	Dpp10	c.1544-13T>G
chr1	123384152	CA	C	204	25	0.4	0	15,0,10,0	MODIFIER	NONE	intron_variant	Dpp10	c.1373+132delT
chr1	123686052	GA	G	115	32	0.21875	0	25,0,7,0	MODIFIER	NONE	intron_variant	Dpp10	c.378+168delT
chr1	123757795	TTAA	T	330	29	0.344828	8	5,14,0,10	MODIFIER	NONE	intron_variant	Dpp10	c.284-71483_284-71481delTTA
chr1	125394097	G	GA	135	95	0.115789	4	12,72,0,11	LOW	LOW	LOW	NONE	NONE
chr1	125562701	T	G	301	30	0.333333	2	2,18,2,8	MODIFIER	NONE	intron_variant	Slc35f5	c.273+60T>G
chr1	125982028	C	A	272	12	0.666667	0	4,0,8,0	MODIFIER	MODIFIER	MODIFIER	NONE	NONE
chr1	126695547	A	AG	608	19	0.947368	0	1,0,18,0	MODIFIER	MODIFIER	NONE	NONE	intron_variant
chr1	127471590	AGT	A	148	66	0.075758	0	6,58,0,5	MODIFIER	NONE	intron_variant	Mgat5	c.1866+16_1866+17delGT
chr1	127519539	A	C	410	26	0.5	0	0,13,0,13	MODIFIER	NONE	intron_variant	Tmem163	c.456-98T>G
chr1	127909750	A	C	397	32	0.40625	0	18,0,14,0	MODIFIER	NONE	intron_variant	Rab3gap1	c.649-101A>C
chr1	127930491	CAT	C	210	72	0.097222	4	14,49,0,7	MODIFIER	NONE	intron_variant	Rab3gap1	c.1551+48_1551+49delAT
chr1	127938175	CT	C	77	108	0.064815	10	87,15,4,3	MODIFIER	NONE	intron_variant	Rab3gap1	c.2387-22delT
chr1	127938364	A	AT	97	104	0.096154	4	16,79,0,10	MODIFIER	NONE	intron_variant	Rab3gap1	c.2490+63_2490+64insT
chr1	127987140	G	C	123	13	0.307692	0	8,0,5,0	MODIFIER	MODIFIER	NONE	NONE	intron_variant
chr1	128040780	C	CT	82	119	0.058824	7	101,12,5,2	MODIFIER	MODIFIER	NONE	NONE	intron_variant
chr1	128319284	C	A	86	13	0.230769	0	0,10,0,3	MODIFIER	NONE	intron_variant	Lct	c.647-146G>T
chr1	128345932	C	T	715	61	0.409836	1	8,26,5,22	MODERATE	MODERATE	NONE	NONE	missense_variant
chr1	128588800	CAT	C	242	27	0.259259	0	19,1,7,0	MODIFIER	NONE	3_prime_UTR_variant	Cxcr4	c.*41_*42delAT
chr1	129430968	CG	C	684	71	0.295775	0	22,28,10,11	HIGH	NONE	frameshift_variant	Thsd7b	c.128delG
chr1	129801338	T	C	422	65	0.246154	5	43,5,17,0	MODIFIER	NONE	intron_variant	Thsd7b	c.2267-15305T>C
chr1	129801383	T	C	121	124	0.064516	0	103,13,8,0	MODIFIER	NONE	intron_variant	Thsd7b	c.2267-15260T>C
chr1	129816691	C	A	1452	182	0.28022	0	78,52,31,21	MODERATE	NONE	missense_variant	Thsd7b	c.2315C>A
chr1	130103042	AT	A	536	97	0.298969	0	45,23,19,10	MODIFIER	NONE	intron_variant	Thsd7b	c.3142-28delT
chr1	130210117	ACT	A	124	38	0.105263	0	33,0,4,0	MODIFIER	NONE	intron_variant	Thsd7b	c.4655-123_4655-122delCT
chr1	130210140	CTG	C	84	61	0.04918	0	56,0,3,0	MODIFIER	NONE	intron_variant	Thsd7b	c.4655-100_4655-99delTG
chr1	130619306	G	A	293	36	0.277778	0	20,6,8,2	MODIFIER	NONE	intron_variant	Zp3r	c.94+38C>T
chr1	130706314	AAC	A	91	33	0.090909	0	30,0,3,0	MODIFIER	MODIFIER	MODIFIER	MODIFIER	NONE
chr1	130706355	GGA	G	199	52	0.134615	15	42,3,4,3	MODIFIER	MODIFIER	MODIFIER	MODIFIER	NONE
chr1	130743128	A	C	534	50	0.38	1	23,8,13,6	MODERATE	NONE	missense_variant	AA986860	c.1086A>C
chr1	130845111	TGG	T	347	54	0.351852	24	20,14,3,16	MODIFIER	NONE	intron_variant	Pigr	c.1042+24_1042+25delGG
chr1	130848396	GA	G	87	21	0.238095	12	14,2,2,3	MODIFIER	NONE	intron_variant	Pigr	c.1709-41delA
chr1	130848603	A	G	609	57	0.368421	1	16,19,9,13	MODERATE	NONE	missense_variant	Pigr	c.1874A>G
chr1	131023957	G	GA	79	100	0.08	7	22,72,0,8	MODIFIER	NONE	intron_variant	Il10	c.445-219_445-218insA
chr1	131023957	GA	G	91	100	0.09	0	19,74,2,7	MODIFIER	NONE	intron_variant	Il10	c.445-218delA
chr1	131097274	G	C	190	37	0.216216	0	19,10,6,2	MODIFIER	NONE	intron_variant	Mapkapk2	c.237+15C>G
chr1	131129591	G	T	650	86	0.27907	0	37,25,14,10	MODERATE	NONE	missense_variant	Dyrk3	c.844C>A
chr1	131155749	ATG	A	156	48	0.104167	0	1,41,0,5	MODIFIER	MODIFIER	NONE	NONE	intron_variant
chr1	131292698	G	A	130	83	0.072289	1	26,51,1,5	LOW	NONE	synonymous_variant	Srgap2	c.2655C>T
chr1	131411779	CT	C	109	55	0.145455	0	42,5,8,0	MODIFIER	NONE	intron_variant	Srgap2	c.423+20delA
chr1	131759536	AGTGT	A	84	28	0.107143	0	1,25,0,3	MODIFIER	NONE	intron_variant	Slc26a9	c.1389+44_1389+47delGTGT
chr1	131762654	A	T	119	51	0.098039	0	44,2,5,0	MODIFIER	NONE	intron_variant	Slc26a9	c.1497-102A>T
chr1	131804452	C	A	276	26	0.346154	0	16,0,10,0	MODIFIER	NONE	intron_variant	Pm20d1	c.907-135C>A
chr1	131814083	A	T	275	28	0.321429	0	0,19,0,9	MODIFIER	NONE	intron_variant	Pm20d1	c.1388+93A>T
chr1	131870070	C	G	137	30	0.233333	8	2,10,0,18	MODIFIER	NONE	intron_variant	Rab29	c.196+66C>G
chr1	131872449	CT	C	153	55	0.218182	15	38,5,7,5	MODIFIER	NONE	intron_variant	Rab29	c.501-16delT
chr1	131978094	T	C	643	57	0.385965	0	14,20,9,14	MODERATE	MODERATE	NONE	NONE	missense_variant
chr1	132023666	G	A	139	24	0.25	0	4,14,1,5	MODIFIER	MODIFIER	NONE	NONE	3_prime_UTR_variant
chr1	132046297	G	T	239	78	0.128205	0	43,25,6,4	MODIFIER	MODIFIER	NONE	NONE	intron_variant
chr1	132228336	GGT	G	90	37	0.081081	0	5,27,0,3	MODIFIER	MODIFIER	MODIFIER	MODIFIER	MODIFIER
chr1	132483945	AC	A	273	54	0.296296	0	35,3,15,1	MODIFIER	NONE	intron_variant	Rbbp5	c.20-106delC
chr1	133101463	TC	T	618	26	0.923077	13	2,1,2,22	MODIFIER	NONE	intron_variant	Pik3c2b	c.4277+10delC
chr1	133103242	AT	A	149	39	0.230769	0	30,0,9,0	MODIFIER	NONE	intron_variant	Pik3c2b	c.4396-110delT
chr1	133365652	G	T	417	61	0.245902	0	24,21,9,7	MODERATE	NONE	missense_variant	Etnk2	c.332G>T
chr1	134188081	ATTT	A	82	20	0.25	2	3,11,0,5	MODIFIER	NONE	intron_variant	Chil1	c.738+89_738+91delTTT
chr1	134234064	G	T	569	77	0.272727	13	26,29,16,6	MODERATE	MODERATE	MODERATE	MODIFIER	MODIFIER
chr1	134328109	GAC	G	145	76	0.065789	4	19,53,0,5	MODIFIER	NONE	intron_variant	Ppfia4	c.577-22_577-21delGT
chr1	134328822	T	G	92	23	0.478261	23	7,5,0,11	MODIFIER	NONE	intron_variant	Ppfia4	c.337-14A>C
chr1	134328829	C	G	133	32	0.4375	32	5,4,0,23	MODIFIER	NONE	intron_variant	Ppfia4	c.337-21G>C
chr1	134489623	G	T	89	10	0.3	0	0,6,0,4	MODIFIER	MODIFIER	NONE	NONE	3_prime_UTR_variant
chr1	134627217	G	GA	73	92	0.065217	0	73,13,5,1	MODIFIER	NONE	intron_variant	Kdm5b	c.3910-48_3910-47insA
chr1	134744598	C	A	395	26	0.5	0	4,7,5,10	MODIFIER	NONE	intron_variant	Syt2	c.810+47C>A
chr1	134745905	ACC	A	76	27	0.222222	9	7,10,0,6	MODIFIER	NONE	intron_variant	Syt2	c.928+59_928+60delCC
chr1	134887192	GCA	G	202	71	0.098592	0	61,0,7,0	MODIFIER	NONE	intron_variant	Ppp1r12b	c.1001+81_1001+82delTG
chr1	134987643	C	T	350	35	0.342857	5	6,16,6,7	MODERATE	NONE	missense_variant	Lgr6	c.2197G>A
chr1	135419128	G	A	195	11	0.545455	0	5,0,6,0	MODIFIER	NONE	intron_variant	Ipo9	c.514+109C>T
chr1	135463810	AAG	A	72	98	0.030612	0	58,38,2,1	MODIFIER	NONE	intron_variant	Nav1	c.3238-13_3238-12delCT
chr1	135877152	G	A	115	13	0.307692	3	3,6,0,4	LOW	LOW	NONE	NONE	synonymous_variant
chr1	135956815	C	T	94	32	0.125	2	13,15,3,1	MODERATE	NONE	missense_variant	Igfn1	c.7792G>A
chr1	136098512	G	GT	81	66	0.090909	0	42,21,4,2	MODIFIER	MODIFIER	NONE	NONE	intron_variant
chr1	136216170	C	A	459	69	0.246377	14	19,31,13,6	MODERATE	MODIFIER	NONE	NONE	missense_variant
chr1	136283698	T	C	609	17	0.941176	0	0,0,16,1	MODIFIER	NONE	intron_variant	Camsap2	c.1201+169A>G
chr1	136510303	C	CATAAT	93	35	0.085714	0	1,32,0,3	MODIFIER	NONE	intron_variant	Kif14	c.3674+58_3674+59insATAAT
chr1	136521085	TCA	T	105	14	0.214286	0	11,0,3,0	MODIFIER	NONE	intron_variant	Kif14	c.4327-104_4327-103delCA
chr1	138066325	CT	C	74	28	0.178571	0	0,23,0,5	MODIFIER	MODIFIER	MODIFIER	NONE	NONE
chr1	138079999	A	G	413	180	0.094444	5	61,102,9,8	MODIFIER	MODIFIER	MODIFIER	NONE	NONE
chr1	138083321	GTA	G	143	11	0.363636	4	7,0,3,1	MODIFIER	MODIFIER	MODIFIER	NONE	NONE
chr1	138083411	ATG	A	156	47	0.106383	0	41,0,5,0	MODIFIER	MODIFIER	MODIFIER	NONE	NONE
chr1	138083971	C	A	134	10	0.4	0	0,6,0,4	MODIFIER	MODIFIER	MODIFIER	NONE	NONE
chr1	138088568	G	T	2464	167	0.461078	2	47,42,45,33	MODERATE	MODERATE	MODERATE	NONE	NONE
chr1	138113783	GA	G	164	105	0.133333	9	19,75,0,14	LOW	LOW	LOW	NONE	NONE
chr1	138502762	C	G	119	13	0.538462	0	0,2,0,11	MODIFIER	MODIFIER	NONE	NONE	intron_variant
chr1	138828507	TTC	T	94	32	0.09375	0	28,0,3,0	MODIFIER	MODIFIER	MODIFIER	NONE	NONE
chr1	138991273	TA	T	99	10	0.4	0	6,0,4,0	MODIFIER	MODIFIER	NONE	NONE	intron_variant
chr1	139140571	GGT	G	123	30	0.133333	2	6,19,0,4	MODIFIER	MODIFIER	NONE	NONE	intron_variant
chr1	139169966	G	T	1461	87	0.54023	0	20,17,26,24	MODERATE	MODERATE	NONE	NONE	missense_variant
chr1	139234909	GA	G	399	48	0.416667	0	4,26,3,17	MODIFIER	NONE	intron_variant	Crb1	c.3747-55delT
chr1	139437426	C	CT	90	173	0.052023	6	127,38,5,4	MODIFIER	NONE	intron_variant	Zbtb41	c.1544-15_1544-14insT
chr1	139437426	CT	C	118	173	0.063584	5	122,41,10,1	MODIFIER	NONE	intron_variant	Zbtb41	c.1544-14delT
chr1	139447101	A	G	1460	190	0.273684	2	67,70,23,30	LOW	NONE	synonymous_variant	Zbtb41	c.2298A>G
chr1	139454983	C	T	179	18	0.333333	2	5,1,7,5	HIGH	MODIFIER	NONE	NONE	stop_gained
chr1	139457020	CT	C	119	94	0.106383	10	50,33,9,1	MODIFIER	MODIFIER	NONE	NONE	downstream_gene_variant
chr1	139469242	A	G	303	31	0.322581	0	21,0,10,0	MODIFIER	NONE	intron_variant	Aspm	c.2665-94A>G
chr1	139470773	CT	C	97	74	0.121622	4	11,53,0,9	MODIFIER	NONE	intron_variant	Aspm	c.3072+17delT
chr1	139493629	CT	C	158	183	0.087432	10	147,16,12,4	MODIFIER	NONE	intron_variant	Aspm	c.9267-18delT
chr1	139501575	G	T	302	48	0.229167	0	37,0,11,0	MODIFIER	MODIFIER	NONE	NONE	upstream_gene_variant
chr1	139928049	AT	A	152	10	0.7	0	3,0,7,0	MODIFIER	NONE	intergenic_region	Cfhr2-Cfh	n.139928050delT
chr1	140100987	G	GA	385	109	0.211009	2	25,60,8,15	LOW	NONE	splice_region_variant&intron_variant	Cfh	c.3026-4_3026-3insT
chr1	140102784	T	G	3772	245	0.489796	2	48,77,50,70	MODERATE	NONE	missense_variant	Cfh	c.2565A>C
chr1	140512781	TA	T	244	37	0.216216	0	29,0,8,0	MODIFIER	NONE	intron_variant	Kcnt2	c.1784-39delA
chr1	140533786	T	G	373	37	0.351351	0	23,1,13,0	MODIFIER	NONE	intron_variant	Kcnt2	c.2349-75T>G
chr1	140540462	TA	T	225	47	0.276596	0	6,29,2,11	MODIFIER	NONE	intron_variant	Kcnt2	c.2483+6468delA
chr1	142125003	G	A	101	93	0.053763	0	52,36,3,2	MODIFIER	NONE	intergenic_region	4930590L20Rik-Cdc73	n.142125003G>A
chr1	142125135	A	G	3490	103	0.980583	0	0,0,41,62	MODIFIER	NONE	intergenic_region	4930590L20Rik-Cdc73	n.142125135A>G
chr1	142125179	C	G	2484	78	0.948718	0	0,0,21,57	MODIFIER	NONE	intergenic_region	4930590L20Rik-Cdc73	n.142125179C>G
chr1	142125294	G	GT	2530	79	0.924051	0	3,3,41,32	MODIFIER	NONE	intergenic_region	4930590L20Rik-Cdc73	n.142125294_142125295insT
chr1	143608507	A	G	2339	404	0.222772	0	153,157,44,49	MODIFIER	NONE	3_prime_UTR_variant	Cdc73	c.*14T>C
chr1	143683474	TG	T	988	294	0.14966	2	117,138,18,26	MODIFIER	NONE	intron_variant	Cdc73	c.512+2448delC
chr1	143683485	A	C	970	275	0.170909	4	96,132,16,31	MODIFIER	NONE	intron_variant	Cdc73	c.512+2438T>G
chr1	143683495	T	C	893	246	0.178862	3	80,121,15,30	MODIFIER	NONE	intron_variant	Cdc73	c.512+2428A>G
chr1	143683528	A	G	496	134	0.19403	13	17,91,0,26	MODIFIER	NONE	intron_variant	Cdc73	c.512+2395T>C
chr1	143683533	A	G	436	116	0.206897	4	7,85,0,24	MODIFIER	NONE	intron_variant	Cdc73	c.512+2390T>C
chr1	143683534	C	T	456	112	0.214286	0	3,85,0,24	MODIFIER	NONE	intron_variant	Cdc73	c.512+2389G>A
chr1	143683567	AG	A	306	94	0.170213	0	4,74,0,16	MODIFIER	NONE	intron_variant	Cdc73	c.512+2355delC
chr1	143686015	AAAT	A	172	98	0.061224	4	23,71,0,6	LOW	NONE	splice_region_variant&intron_variant	Cdc73	c.424-7_424-5delATT
chr1	143699246	A	C	1299	182	0.263736	0	72,60,26,23	MODERATE	NONE	missense_variant	Cdc73	c.208T>G
chr1	143745027	AT	A	82	115	0.069565	0	92,13,7,1	MODIFIER	MODIFIER	MODIFIER	MODIFIER	NONE
chr1	144001594	G	GT	146	24	0.375	0	12,0,9,0	MODIFIER	NONE	3_prime_UTR_variant	Rgs2	c.*85dupA
chr1	144003057	G	GA	178	68	0.176471	1	10,46,1,11	LOW	NONE	splice_region_variant&intron_variant	Rgs2	c.111-5_111-4insT
chr1	144003071	GA	G	326	55	0.345455	0	3,34,2,17	MODIFIER	NONE	intron_variant	Rgs2	c.111-19delT
chr1	144171488	TA	T	110	114	0.087719	4	17,88,0,10	LOW	NONE	splice_region_variant&intron_variant	Rgs13	c.-5-3delT
chr1	144223129	TGG	T	210	28	0.428571	7	6,11,1,11	MODIFIER	NONE	intergenic_region	Rgs13-Rgs1	n.144223130_144223131delGG
chr1	144249104	AG	A	1064	29	0.931035	0	0,2,0,27	MODIFIER	MODIFIER	NONE	NONE	upstream_gene_variant
chr1	146727078	C	T	91	17	0.294118	0	0,12,0,5	MODIFIER	MODIFIER	NONE	NONE	intron_variant
chr1	147505935	A	G	308	81	0.185185	0	46,19,12,4	MODIFIER	NONE	intergenic_region	Brinp3-Pla2g4a	n.147505935A>G
chr1	149830301	AGT	A	92	30	0.1	0	0,27,0,3	MODIFIER	MODIFIER	NONE	NONE	intron_variant
chr1	149932573	TG	T	173	34	0.323529	2	39,2,10,1	MODIFIER	NONE	intron_variant	Pla2g4a	c.33+84delC
chr1	149932592	GCA	G	148	48	0.104167	0	35,8,4,1	MODIFIER	NONE	intron_variant	Pla2g4a	c.33+64_33+65delTG
chr1	150269061	C	G	241	77	0.168831	12	24,40,9,4	MODIFIER	NONE	intergenic_region	Ptgs2os2-Pdc	n.150269061C>G
chr1	150371897	CGTGTGT	C	140	18	0.222222	0	10,0,4,0	MODIFIER	MODIFIER	NONE	NONE	intron_variant
chr1	150417590	A	T	479	58	0.275862	5	5,37,0,16	MODIFIER	NONE	intron_variant	Tpr	c.2691+74A>T
chr1	150582420	CT	C	243	60	0.233333	0	4,42,1,13	MODIFIER	NONE	intron_variant	Hmcn1	c.15686-73delA
chr1	150583063	TAC	T	89	20	0.15	0	16,0,3,0	MODIFIER	NONE	intron_variant	Hmcn1	c.15685+102_15685+103delGT
chr1	150652769	CT	C	233	35	0.371429	0	0,21,0,13	MODIFIER	NONE	intron_variant	Hmcn1	c.9725-99delA
chr1	150690457	CATCTATCT	C	200	32	0.1875	0	18,0,6,0	MODIFIER	NONE	intron_variant	Hmcn1	c.6697+89_6697+96delAGATAGAT
chr1	150690457	CATCT	C	237	32	0.21875	0	18,0,7,0	MODIFIER	NONE	intron_variant	Hmcn1	c.6697+93_6697+96delAGAT
chr1	150715884	CA	C	529	69	0.42029	7	8,30,2,27	MODIFIER	NONE	intron_variant	Hmcn1	c.5623-61delT
chr1	150743517	TGG	T	92	34	0.176471	5	14,2,4,2	MODIFIER	NONE	intron_variant	Hmcn1	c.3775+68_3775+69delCC
chr1	150743517	TG	T	277	34	0.441176	4	14,2,11,4	MODIFIER	NONE	intron_variant	Hmcn1	c.3775+69delC
chr1	150806516	GA	G	145	29	0.310345	1	5,15,3,6	LOW	NONE	splice_region_variant&intron_variant	Hmcn1	c.1286-5delT
chr1	151192847	C	A	611	34	0.647059	3	5,6,14,9	MODIFIER	NONE	intergenic_region	C730036E19Rik-Ivns1abp	n.151192847C>A
chr1	151192893	A	C	628	31	0.645161	1	5,6,7,13	MODIFIER	NONE	intergenic_region	C730036E19Rik-Ivns1abp	n.151192893A>C
chr1	151192903	A	G	643	28	0.678571	1	5,4,8,11	MODIFIER	NONE	intergenic_region	C730036E19Rik-Ivns1abp	n.151192903A>G
chr1	151193116	A	C	136	17	0.294118	2	7,5,2,3	MODIFIER	NONE	intergenic_region	C730036E19Rik-Ivns1abp	n.151193116A>C
chr1	151193202	C	T	158	24	0.333333	0	7,9,4,4	MODIFIER	NONE	intergenic_region	C730036E19Rik-Ivns1abp	n.151193202C>T
chr1	151204688	A	C	157	37	0.243243	0	7,19,2,7	MODIFIER	NONE	intergenic_region	C730036E19Rik-Ivns1abp	n.151204688A>C
chr1	151351801	TC	T	238	89	0.213483	0	40,29,12,7	MODIFIER	MODIFIER	MODIFIER	NONE	NONE
chr1	151354955	CT	C	95	21	0.285714	4	11,4,3,3	MODIFIER	MODIFIER	MODIFIER	NONE	NONE
chr1	151370462	TCA	T	92	21	0.142857	0	18,0,3,0	MODIFIER	NONE	intron_variant	Swt1	c.2594+115_2594+116delTG
chr1	151433924	TAC	T	118	35	0.114286	0	6,26,0,4	MODIFIER	NONE	intron_variant	Trmt1l	c.337+21_337+22delAC
chr1	151453831	T	TA	70	88	0.079545	0	73,8,7,0	MODIFIER	NONE	intron_variant	Trmt1l	c.1578-54_1578-53insA
chr1	151454952	TC	T	112	122	0.07377	0	105,9,9,0	MODIFIER	NONE	intron_variant	Trmt1l	c.1745-25delC
chr1	151520302	CT	C	101	15	0.4	0	9,0,6,0	MODIFIER	NONE	intergenic_region	Rnf2-Fam129a	n.151520303delT
chr1	151689582	A	C	1568	176	0.323864	0	46,71,23,36	MODERATE	NONE	missense_variant	Fam129a	c.662A>C
chr1	151689584	G	T	1484	175	0.314286	0	46,70,24,35	HIGH	NONE	stop_gained	Fam129a	c.664G>T
chr1	152400387	A	G	208	38	0.210526	1	15,13,4,6	MODERATE	NONE	missense_variant	Colgalt2	c.250A>G
chr1	152495887	GTC	G	154	50	0.1	2	9,37,0,5	MODIFIER	NONE	intron_variant	Colgalt2	c.1026+10_1026+11delTC
chr1	152495973	C	A	125	10	0.4	0	0,6,0,4	MODIFIER	NONE	intron_variant	Colgalt2	c.1026+95C>A
chr1	152854389	TA	T	122	52	0.211538	1	8,30,1,10	MODIFIER	MODIFIER	MODIFIER	NONE	NONE
chr1	153137370	AG	A	76	24	0.208333	2	5,16,2,3	MODIFIER	NONE	intron_variant	Lamc2	c.1861-18delC
chr1	153144743	A	G	499	43	0.395349	3	4,22,5,12	MODIFIER	NONE	intron_variant	Lamc2	c.1067-11T>C
chr1	154472108	C	T	231	94	0.106383	0	42,42,5,5	MODERATE	NONE	missense_variant	Cacna1e	c.2906G>A
chr1	155198089	A	AT	71	86	0.081395	2	65,14,5,2	MODIFIER	NONE	intron_variant	Stx6	c.691+654_691+655insT
chr1	155198089	AT	A	71	86	0.081395	4	60,16,7,0	MODIFIER	NONE	intron_variant	Stx6	c.691+655delT
chr1	155225717	C	G	309	43	0.27907	0	19,12,8,4	MODIFIER	NONE	intergenic_region	Stx6-Xpr1	n.155225717C>G
chr1	155615841	C	CT	95	138	0.072464	1	103,24,9,1	MODIFIER	NONE	intron_variant	Acbd6	c.468-26_468-25insT
chr1	155615841	CT	C	243	138	0.144928	1	94,20,16,4	MODIFIER	NONE	intron_variant	Acbd6	c.468-25delT
chr1	155704769	C	A	301	29	0.344828	0	14,5,7,3	MODERATE	NONE	missense_variant	Lhx4	c.710G>T
chr1	156079971	A	C	289	38	0.263158	3	11,16,6,5	MODERATE	NONE	missense_variant	Fam163a	c.74T>G
chr1	156320864	AT	A	199	42	0.285714	18	27,2,7,5	MODIFIER	NONE	intron_variant	Nphs2	c.541-19delT
chr1	156365831	GA	G	73	51	0.137255	10	15,28,0,7	MODIFIER	NONE	intergenic_region	Nphs2-Soat1	n.156365832delA
chr1	156442595	C	CT	353	11	0.818182	0	0,2,0,9	MODIFIER	NONE	intron_variant	Soat1	c.360-108_360-107insA
chr1	157043523	CT	C	167	53	0.226415	0	39,3,11,1	MODIFIER	NONE	intergenic_region	Ralgps2-Tex35	n.157043524delT
chr1	157161408	T	A	340	33	0.333333	0	0,21,0,12	MODIFIER	NONE	intron_variant	Rasal2	c.2007-82A>T
chr1	157174086	TA	T	95	62	0.112903	4	52,3,6,1	MODIFIER	NONE	intron_variant	Rasal2	c.1624+56delT
chr1	157414038	T	TTTCC	86	57	0.052632	2	15,41,0,3	MODIFIER	MODIFIER	NONE	NONE	upstream_gene_variant
chr1	157535939	GGT	G	144	78	0.064103	2	15,59,0,5	MODIFIER	MODIFIER	MODIFIER	NONE	NONE
chr1	157977619	C	T	106	15	0.266667	0	7,4,2,2	MODIFIER	NONE	intergenic_region	Sec16b-Brinp2	n.157977619C>T
chr1	158763008	A	T	382	42	0.333333	0	22,5,13,2	MODIFIER	NONE	intron_variant	Pappa2	c.5014+61T>A
chr1	158834971	CT	C	318	44	0.318182	0	4,26,2,12	MODIFIER	NONE	intron_variant	Pappa2	c.3461-29delA
chr1	158857235	G	A	482	62	0.274194	2	20,24,10,8	MODERATE	NONE	missense_variant	Pappa2	c.2333C>T
chr1	159168087	A	AT	84	71	0.098592	3	60,4,6,1	MODIFIER	NONE	intergenic_region	Pappa2-Rfwd2	n.159168087_159168088insT
chr1	159319693	G	GT	97	117	0.076923	1	84,24,8,1	MODIFIER	NONE	intron_variant	Rfwd2	c.1619-31_1619-30insT
chr1	159325099	CAA	C	85	107	0.074766	4	17,73,0,8	MODIFIER	NONE	intron_variant	Rfwd2	c.1853+66_1853+67delAA
chr1	159325099	CA	C	129	107	0.102804	1	17,73,1,10	MODIFIER	NONE	intron_variant	Rfwd2	c.1853+66delA
chr1	159326994	AT	A	96	51	0.156863	0	42,1,8,0	MODIFIER	NONE	intron_variant	Rfwd2	c.1854-82delT
chr1	160071445	A	G	1849	206	0.305825	1	78,65,37,26	MODIFIER	MODIFIER	MODIFIER	MODIFIER	NONE
chr1	160086222	TG	T	85	22	0.227273	0	2,15,0,5	MODIFIER	NONE	intron_variant	Tnn	c.4546-55delC
chr1	160130553	A	C	184	19	0.315789	0	13,0,6,0	MODIFIER	NONE	intron_variant	Tnn	c.1588+131T>G
chr1	160930070	TTG	T	94	29	0.103448	9	26,0,2,1	MODIFIER	NONE	5_prime_UTR_variant	Rc3h1	c.-31_-30delTG
chr1	160948508	CA	C	72	38	0.131579	0	2,32,0,5	MODIFIER	NONE	intron_variant	Rc3h1	c.1221+84delA
chr1	160997396	C	T	507	69	0.26087	0	30,21,10,8	MODERATE	NONE	missense_variant	Serpinc1	c.812C>T
chr1	161000081	CT	C	119	87	0.114943	1	21,60,3,7	MODIFIER	NONE	intron_variant	Serpinc1	c.1221+29delT
chr1	161036195	TC	T	136	103	0.097087	5	57,36,4,6	MODIFIER	MODIFIER	MODIFIER	MODIFIER	NONE
chr1	161053908	C	A	567	51	0.372549	0	22,8,15,6	MODIFIER	NONE	intron_variant	Dars2	c.1017+33G>T
chr1	161057390	CT	C	74	37	0.162162	0	26,4,5,1	MODIFIER	NONE	intron_variant	Dars2	c.767+56delA
chr1	161065302	GA	G	72	62	0.096774	0	12,45,1,5	MODIFIER	NONE	intron_variant	Dars2	c.225-12delT
chr1	161131440	C	G	651	87	0.287356	1	17,45,8,17	MODIFIER	NONE	5_prime_UTR_variant	Klhl20	c.-134G>C
chr1	161150967	ATTT	A	138	40	0.275	4	22,0,10,1	MODERATE	NONE	disruptive_inframe_deletion	Ankrd45	c.93_95delTTT
chr1	162221281	C	CT	107	57	0.157895	0	44,5,8,1	MODIFIER	MODIFIER	MODIFIER	MODIFIER	MODIFIER
chr1	162221281	CT	C	77	57	0.122807	0	44,5,7,0	MODIFIER	MODIFIER	MODIFIER	MODIFIER	MODIFIER
chr1	162274403	TA	T	135	77	0.142857	1	57,8,9,2	MODIFIER	MODIFIER	NONE	NONE	intron_variant
chr1	162321116	A	T	101	106	0.04717	8	45,54,1,6	LOW	LOW	NONE	NONE	splice_region_variant&intron_variant
chr1	162851572	TAC	T	86	34	0.088235	0	5,27,0,3	MODIFIER	NONE	intron_variant	Fmo1	c.133-31_133-30delGT
chr1	163076385	GA	G	604	99	0.343434	12	12,60,1,33	MODIFIER	NONE	intron_variant	Mroh9	c.73-17delT
chr1	163782967	C	CT	139	163	0.08589	1	108,42,11,3	MODIFIER	MODIFIER	NONE	NONE	intron_variant
chr1	163782967	CT	C	125	163	0.079755	7	111,39,7,6	MODIFIER	MODIFIER	NONE	NONE	intron_variant
chr1	163817779	GT	G	364	71	0.338028	0	42,0,24,0	MODIFIER	MODIFIER	NONE	NONE	intron_variant
chr1	163997296	GT	G	119	97	0.103093	0	6,81,0,10	MODIFIER	MODIFIER	MODIFIER	NONE	NONE
chr1	164052991	C	G	111	83	0.060241	1	32,46,1,4	MODERATE	NONE	missense_variant	Sele	c.1141C>G
chr1	164154494	GA	G	239	49	0.326531	0	0,33,0,16	MODIFIER	MODIFIER	MODIFIER	NONE	NONE
chr1	164176141	C	A	612	41	0.463415	1	19,2,17,3	MODIFIER	NONE	intron_variant	F5	c.584-80C>A
chr1	164184902	T	G	894	107	0.299065	0	58,17,24,8	MODIFIER	NONE	intron_variant	F5	c.1394-10T>G
chr1	164193394	A	G	888	79	0.367089	0	27,22,15,15	MODERATE	NONE	missense_variant	F5	c.3437A>G
chr1	164332481	C	T	155	16	0.3125	0	11,0,5,0	MODIFIER	MODIFIER	MODIFIER	NONE	NONE
chr1	164404735	TA	T	3109	95	0.905263	0	1,9,12,74	MODIFIER	MODIFIER	NONE	NONE	intron_variant
chr1	165236936	T	A	87	15	0.2	0	1,9,0,5	MODIFIER	NONE	5_prime_UTR_variant	Tiprl	c.-103A>T
chr1	165306320	C	T	1069	105	0.352381	3	42,26,26,11	LOW	LOW	LOW	NONE	NONE
chr1	165519988	G	GGAGA	88	39	0.076923	0	2,28,0,3	MODIFIER	NONE	intron_variant	Adcy10	c.1216+55_1216+56insGAGA
chr1	165519988	G	GGAGAGA	88	39	0.076923	0	2,28,0,3	MODIFIER	NONE	intron_variant	Adcy10	c.1216+55_1216+56insGAGAGA
chr1	165547996	G	T	142	24	0.208333	0	19,0,5,0	MODIFIER	NONE	intron_variant	Adcy10	c.2312-120G>T
chr1	165875455	CT	C	76	34	0.176471	0	24,1,6,0	MODIFIER	MODIFIER	MODIFIER	MODIFIER	MODIFIER
chr1	166303423	TA	T	73	48	0.125	0	42,1,6,0	MODIFIER	NONE	intron_variant	Ildr2	c.926-78delA
chr1	166945483	TTG	T	117	32	0.125	0	28,0,4,0	MODIFIER	NONE	intergenic_region	Fmo9-Gm16701	n.166945484_166945485delTG
chr1	168431269	GA	G	84	29	0.206897	0	20,3,5,1	MODIFIER	MODIFIER	MODIFIER	MODIFIER	NONE
chr1	168431505	C	A	210	31	0.258065	0	6,16,2,7	MODIFIER	MODIFIER	MODIFIER	MODIFIER	NONE
chr1	169516820	G	T	126	13	0.307692	0	0,9,0,4	MODIFIER	NONE	intron_variant	Nuf2	c.338-162C>A
chr1	169744587	AGT	A	84	42	0.071429	2	25,15,3,0	MODIFIER	NONE	intron_variant	Rgs4	c.212-72_212-71delAC
chr1	169930240	A	AG	268	12	1	0	0,2,0,12	MODIFIER	NONE	intron_variant	Ccdc190	c.187+80_187+81insG
chr1	169984905	T	C	502	71	0.253521	0	34,18,12,7	MODERATE	NONE	missense_variant	Ddr2	c.2017A>G
chr1	170005405	AC	A	233	19	0.684211	0	0,7,1,12	MODIFIER	NONE	intron_variant	Ddr2	c.186-102delG
chr1	170005412	A	AG	242	13	1	0	0,0,1,12	MODIFIER	NONE	intron_variant	Ddr2	c.186-109_186-108insC
chr1	170035896	A	C	1006	93	0.365591	10	40,19,29,5	MODIFIER	NONE	intron_variant	Ddr2	c.82+17T>G
chr1	170589374	C	A	323	71	0.183099	8	17,33,3,18	MODIFIER	NONE	5_prime_UTR_variant	Nos1ap	c.-10G>T
chr1	170630862	AG	A	367	46	0.347826	0	30,0,16,0	MODIFIER	NONE	intergenic_region	Nos1ap-Olfml2b	n.170630863delG
chr1	170647975	G	A	104	25	0.16	2	5,15,0,5	MODIFIER	NONE	intron_variant	Olfml2b	c.438+30G>A
chr1	170908705	C	T	827	75	0.373333	0	33,14,19,9	LOW	NONE	synonymous_variant	Fcrlb	c.501G>A
chr1	170986056	G	T	447	47	0.361702	1	26,4,16,1	MODIFIER	NONE	intergenic_region	Fcgr2b-Fcgr4	n.170986056G>T
chr1	171028025	AC	A	461	24	0.583333	0	6,5,8,6	MODIFIER	NONE	intron_variant	Fcgr4	c.572-1111delC
chr1	171028130	TAA	T	143	18	0.444444	5	4,3,2,6	MODIFIER	NONE	intron_variant	Fcgr4	c.572-1006_572-1005delAA
chr1	171070969	C	CAAAA	101	11	0.363636	3	2,5,0,4	MODIFIER	NONE	intergenic_region	Mir6546-Cfap126	n.171070969_171070970insAAAA
chr1	171219815	G	A	899	141	0.241135	0	61,45,20,15	HIGH	MODIFIER	MODIFIER	MODIFIER	MODIFIER
chr1	171225520	C	A	597	18	0.888889	0	0,0,10,8	MODIFIER	MODIFIER	MODIFIER	MODIFIER	MODIFIER
chr1	171225521	T	C	655	17	1	0	0,0,10,7	MODIFIER	MODIFIER	MODIFIER	MODIFIER	MODIFIER
chr1	171225530	C	A	750	20	1	0	0,0,13,7	MODIFIER	MODIFIER	MODIFIER	MODIFIER	MODIFIER
chr1	171225552	C	A	970	27	0.962963	0	0,0,21,6	MODIFIER	MODIFIER	MODIFIER	MODIFIER	MODIFIER
chr1	171279111	A	AG	1003	28	0.928571	0	2,0,21,5	MODIFIER	MODIFIER	MODIFIER	NONE	NONE
chr1	171283502	CT	C	74	19	0.263158	0	3,11,1,4	MODIFIER	MODIFIER	NONE	NONE	upstream_gene_variant
chr1	171343829	TAG	T	109	10	0.3	0	1,5,0,3	LOW	LOW	MODIFIER	MODIFIER	MODIFIER
chr1	171344433	A	G	477	117	0.162393	23	32,66,13,6	LOW	LOW	MODIFIER	MODIFIER	MODIFIER
chr1	171344579	A	C	396	39	0.358974	0	5,20,3,11	MODIFIER	MODIFIER	MODIFIER	MODIFIER	MODIFIER
chr1	171356715	G	C	193	123	0.073171	1	58,56,4,5	MODERATE	MODIFIER	NONE	NONE	missense_variant
chr1	171357963	A	G	1917	145	0.448276	2	33,47,24,41	LOW	MODIFIER	NONE	NONE	synonymous_variant
chr1	171358045	GT	G	83	56	0.125	0	1,41,0,7	MODIFIER	MODIFIER	NONE	NONE	3_prime_UTR_variant
chr1	171358045	GTTT	G	99	56	0.142857	0	1,41,0,8	MODIFIER	MODIFIER	NONE	NONE	3_prime_UTR_variant
chr1	171358093	C	T	368	30	0.4	0	0,18,0,12	MODIFIER	MODIFIER	NONE	NONE	3_prime_UTR_variant
chr1	171358128	T	G	177	16	0.375	0	0,10,0,6	MODIFIER	MODIFIER	NONE	NONE	3_prime_UTR_variant
chr1	171382429	G	A	104	22	0.181818	2	8,10,1,3	MODERATE	MODERATE	NONE	NONE	missense_variant
chr1	171460344	G	GT	166	159	0.09434	0	114,29,12,3	MODIFIER	NONE	intron_variant	F11r	c.62-19_62-18insT
chr1	171460344	GT	G	72	159	0.050314	1	122,30,6,2	MODIFIER	NONE	intron_variant	F11r	c.62-18delT
chr1	171463160	G	A	1260	83	0.481928	5	2,37,6,37	MODIFIER	NONE	3_prime_UTR_variant	F11r	c.*66G>A
[truncated: 43,794 more rows]

## Sheet: RENCA Mutation Data
CHROM	POS	REF	ALT	QUAL	DP	AF	SB	DP4	EFF[*].IMPACT	EFF[*].FUNCLASS	EFF[*].EFFECT	EFF[*].GENE	EFF[*].CODON			*Data obtained from NCBI (accession SRR8209105)
chr1	4347438	T	G	627	74	0.297297	0	18,32,8,16	MODERATE	MODIFIER	NONE	NONE	missense_variant
chr1	4348319	C	G	100	139	0.035971	0	83,51,3,2	MODERATE	MODIFIER	NONE	NONE	missense_variant
chr1	4880291	C	T	108	64	0.078125	6	35,23,2,4	MODIFIER	MODIFIER	MODIFIER	NONE	NONE
chr1	4880306	G	A	179	75	0.106667	12	43,24,2,6	MODIFIER	MODIFIER	MODIFIER	NONE	NONE
chr1	4880329	C	T	178	91	0.087912	12	52,31,2,6	MODIFIER	MODIFIER	MODIFIER	NONE	NONE
chr1	4880340	A	G	112	107	0.056075	15	66,35,1,5	MODIFIER	MODIFIER	MODIFIER	NONE	NONE
chr1	4923964	A	C	2253	64	0.96875	0	0,0,32,32	HIGH	MODERATE	MODERATE	NONE	NONE
chr1	5093459	G	A	1090	111	0.342342	2	23,49,10,29	LOW	LOW	NONE	NONE	splice_region_variant&intron_variant
chr1	5093481	C	T	1717	86	0.616279	0	8,23,13,42	MODIFIER	MODIFIER	NONE	NONE	intron_variant
chr1	5095686	C	T	6147	172	0.965116	0	0,0,63,109	LOW	LOW	NONE	NONE	synonymous_variant
chr1	5117372	T	C	2618	79	0.936709	0	0,0,52,27	MODIFIER	MODIFIER	NONE	NONE	intron_variant
chr1	5117377	T	G	382	79	0.189873	6	39,25,12,3	MODIFIER	MODIFIER	NONE	NONE	intron_variant
chr1	5124241	A	G	2301	66	0.954545	0	0,0,54,12	MODIFIER	MODIFIER	NONE	NONE	intron_variant
chr1	5124338	A	G	4834	138	0.934783	0	0,0,73,65	MODERATE	MODERATE	NONE	NONE	missense_variant
chr1	5124505	G	GGT	1217	69	0.478261	0	7,29,6,27	MODIFIER	MODIFIER	NONE	NONE	intron_variant
chr1	5281785	C	G	2524	68	1	0	0,0,31,37	MODIFIER	NONE	intergenic_region	Atp6v1h-Oprk1	n.5281785C>G
chr1	6004316	G	C	2104	64	0.9375	0	0,0,48,16	MODIFIER	NONE	intergenic_region	Npbwr1-Rb1cc1	n.6004316G>C
chr1	6004321	G	A	2509	72	1	0	0,0,50,22	MODIFIER	NONE	intergenic_region	Npbwr1-Rb1cc1	n.6004321G>A
chr1	6004332	T	G	2521	76	0.934211	0	0,0,51,24	MODIFIER	NONE	intergenic_region	Npbwr1-Rb1cc1	n.6004332T>G
chr1	6004384	T	C	2530	74	0.959459	0	0,0,25,49	MODIFIER	NONE	intergenic_region	Npbwr1-Rb1cc1	n.6004384T>C
chr1	6004395	G	A	2340	67	0.985075	0	0,0,21,46	MODIFIER	NONE	intergenic_region	Npbwr1-Rb1cc1	n.6004395G>A
chr1	6004406	G	T	1841	55	0.963636	0	0,0,12,43	MODIFIER	NONE	intergenic_region	Npbwr1-Rb1cc1	n.6004406G>T
chr1	6229936	G	A	2026	58	0.931035	0	0,0,48,10	MODIFIER	NONE	intron_variant	Rb1cc1	c.-44-23G>A
chr1	6234145	G	A	2109	61	0.934426	0	0,0,28,33	MODIFIER	NONE	intron_variant	Rb1cc1	c.198+58G>A
chr1	6239875	A	G	2859	82	0.951219	0	0,0,81,1	MODIFIER	NONE	intron_variant	Rb1cc1	c.573-77A>G
chr1	6239909	G	C	5110	143	0.965035	0	0,0,122,21	MODIFIER	NONE	intron_variant	Rb1cc1	c.573-43G>C
chr1	6239916	A	G	5647	163	0.957055	0	0,0,130,33	MODIFIER	NONE	intron_variant	Rb1cc1	c.573-36A>G
chr1	6240097	C	T	6978	197	0.964467	0	0,0,72,125	LOW	NONE	synonymous_variant	Rb1cc1	c.718C>T
chr1	6240127	A	T	6926	195	0.979487	0	0,0,81,114	MODERATE	NONE	missense_variant	Rb1cc1	c.748A>T
chr1	6240394	G	A	540	124	0.75	2	5,20,26,73	MODIFIER	NONE	intron_variant	Rb1cc1	c.999+16G>A
chr1	6240397	C	CGTGTGT	111	119	0.285714	3	23,65,6,28	MODIFIER	NONE	intron_variant	Rb1cc1	c.999+19_999+20insGTGTGT
chr1	6240401	C	T	466	76	0.921053	0	0,0,13,63	MODIFIER	NONE	intron_variant	Rb1cc1	c.999+23C>T
chr1	6244088	G	A	2659	76	0.947368	0	0,0,55,21	MODIFIER	NONE	intron_variant	Rb1cc1	c.1000-17G>A
chr1	6245025	C	G	1852	55	0.945455	0	0,0,25,30	MODIFIER	NONE	intron_variant	Rb1cc1	c.1355+46C>G
chr1	6245575	A	G	4070	118	0.940678	0	0,0,69,49	MODIFIER	NONE	intron_variant	Rb1cc1	c.1625-23A>G
chr1	6245666	ATT	A	1210	81	0.691358	19	9,16,6,50	LOW	NONE	splice_region_variant&intron_variant	Rb1cc1	c.1686+8_1686+9delTT
chr1	6245700	T	C	858	53	0.641509	0	0,6,3,44	MODIFIER	NONE	intron_variant	Rb1cc1	c.1686+41T>C
chr1	6247750	A	G	12210	354	0.943503	1	3,3,135,213	LOW	NONE	synonymous_variant	Rb1cc1	c.1731A>G
chr1	6247883	TC	T	1945	51	1	0	0,3,12,39	MODIFIER	NONE	intron_variant	Rb1cc1	c.1790+75delC
chr1	6248461	C	T	5488	153	0.973856	0	0,0,62,91	LOW	NONE	synonymous_variant	Rb1cc1	c.2103C>T
chr1	6263343	T	C	1649	50	0.92	0	0,0,6,44	MODIFIER	NONE	intron_variant	Rb1cc1	c.4325+79T>C
chr1	6265539	C	T	4519	124	0.983871	0	0,0,79,45	MODIFIER	NONE	intron_variant	Rb1cc1	c.4375-35C>T
chr1	6265661	T	A	2816	79	0.987342	0	0,0,17,62	MODIFIER	NONE	intron_variant	Rb1cc1	c.4422+40T>A
chr1	6874029	A	T	99	93	0.053763	1	53,35,4,1	MODIFIER	NONE	intergenic_region	St18-Pcmtd1	n.6874029A>T
chr1	6874032	C	T	142	94	0.074468	1	51,36,5,2	MODIFIER	NONE	intergenic_region	St18-Pcmtd1	n.6874032C>T
chr1	6874131	G	A	143	113	0.061947	0	40,65,3,5	MODIFIER	NONE	intergenic_region	St18-Pcmtd1	n.6874131G>A
chr1	7598316	A	C	2281	65	0.953846	0	0,0,43,22	MODIFIER	NONE	intergenic_region	Pcmtd1-Sntg1	n.7598316A>C
chr1	7664156	G	A	1677	50	0.96	0	0,0,38,12	MODIFIER	NONE	intergenic_region	Pcmtd1-Sntg1	n.7664156G>A
chr1	7664179	C	T	2372	68	0.941176	0	0,0,52,16	MODIFIER	NONE	intergenic_region	Pcmtd1-Sntg1	n.7664179C>T
chr1	7664234	G	A	4040	119	0.932773	0	0,0,72,46	MODIFIER	NONE	intergenic_region	Pcmtd1-Sntg1	n.7664234G>A
chr1	7664375	G	A	5408	151	0.97351	0	0,0,60,91	MODIFIER	NONE	intergenic_region	Pcmtd1-Sntg1	n.7664375G>A
chr1	7664377	T	A	5284	149	0.966443	0	0,0,60,89	MODIFIER	NONE	intergenic_region	Pcmtd1-Sntg1	n.7664377T>A
chr1	7664394	C	T	4619	134	0.955224	0	0,0,56,78	MODIFIER	NONE	intergenic_region	Pcmtd1-Sntg1	n.7664394C>T
chr1	7664466	G	T	2998	86	0.953488	0	0,0,39,47	MODIFIER	NONE	intergenic_region	Pcmtd1-Sntg1	n.7664466G>T
chr1	7664592	A	G	2158	60	0.983333	0	0,0,23,37	MODIFIER	NONE	intergenic_region	Pcmtd1-Sntg1	n.7664592A>G
chr1	7664828	A	ACCTGACC	2259	91	0.648352	1	19,15,37,22	MODIFIER	NONE	intergenic_region	Pcmtd1-Sntg1	n.7664828_7664829insCCTGACC
chr1	8065040	C	G	1795	200	0.31	0	79,52,42,27	MODIFIER	NONE	intergenic_region	Pcmtd1-Sntg1	n.8065040C>G
chr1	8065167	T	C	2703	83	0.915663	0	0,0,13,70	MODIFIER	NONE	intergenic_region	Pcmtd1-Sntg1	n.8065167T>C
chr1	8073138	C	T	3456	103	0.951456	0	0,0,56,47	MODIFIER	NONE	intergenic_region	Pcmtd1-Sntg1	n.8073138C>T
chr1	8073179	C	T	2841	87	0.896552	0	0,0,38,49	MODIFIER	NONE	intergenic_region	Pcmtd1-Sntg1	n.8073179C>T
chr1	8073219	T	C	2862	80	1	0	0,0,39,41	MODIFIER	NONE	intergenic_region	Pcmtd1-Sntg1	n.8073219T>C
chr1	8463499	C	T	4719	129	0.984496	0	0,0,10,119	MODIFIER	MODIFIER	MODIFIER	MODIFIER	NONE
chr1	8468678	A	G	2586	73	0.972603	0	0,0,28,45	MODIFIER	MODIFIER	MODIFIER	MODIFIER	NONE
chr1	8583345	A	G	3236	91	0.967033	0	0,0,35,56	MODIFIER	MODIFIER	MODIFIER	MODIFIER	NONE
chr1	8588637	A	C	574	89	0.247191	0	29,38,9,13	MODIFIER	MODIFIER	MODIFIER	MODIFIER	NONE
chr1	8588683	A	G	2223	64	0.984375	0	0,0,23,41	MODIFIER	MODIFIER	MODIFIER	MODIFIER	NONE
chr1	8588786	A	C	622	51	0.411765	2	17,13,10,11	MODIFIER	MODIFIER	MODIFIER	MODIFIER	NONE
chr1	8588874	C	T	1982	63	0.888889	0	1,1,27,34	MODIFIER	MODIFIER	MODIFIER	MODIFIER	NONE
chr1	8624727	C	T	2140	59	1	0	0,0,52,7	MODIFIER	MODIFIER	MODIFIER	MODIFIER	NONE
chr1	8624738	T	C	2402	65	0.984615	0	0,0,51,13	MODIFIER	MODIFIER	MODIFIER	MODIFIER	NONE
chr1	8624910	A	G	2179	61	0.967213	0	0,0,10,51	MODIFIER	MODIFIER	MODIFIER	MODIFIER	NONE
chr1	8677751	A	G	622	80	0.275	1	46,11,18,5	MODIFIER	MODIFIER	MODIFIER	MODIFIER	NONE
chr1	8682000	T	A	5088	141	0.971631	0	0,0,71,70	LOW	LOW	LOW	LOW	MODIFIER
chr1	8792046	G	A	1595	62	0.951613	0	0,0,9,53	MODIFIER	MODIFIER	MODIFIER	MODIFIER	NONE
chr1	8816178	G	C	6011	170	0.958824	0	0,0,50,120	MODIFIER	MODIFIER	MODIFIER	MODIFIER	NONE
chr1	8855917	C	T	2596	85	0.917647	0	0,0,58,27	MODIFIER	MODIFIER	MODIFIER	MODIFIER	NONE
chr1	8856008	G	T	2213	73	0.972603	0	0,0,19,54	MODIFIER	MODIFIER	MODIFIER	MODIFIER	NONE
chr1	8856939	G	A	149	101	0.079208	1	56,37,4,4	MODIFIER	MODIFIER	MODIFIER	MODIFIER	NONE
chr1	8857159	A	G	1841	54	0.962963	0	0,0,11,43	MODIFIER	MODIFIER	MODIFIER	MODIFIER	NONE
chr1	8893951	G	A	2433	101	0.821782	11	4,9,53,35	MODIFIER	MODIFIER	MODIFIER	MODIFIER	NONE
chr1	8894089	C	T	2584	90	0.866667	0	0,0,40,50	MODIFIER	MODIFIER	MODIFIER	MODIFIER	NONE
chr1	8894109	A	C	2906	90	0.922222	0	0,0,57,33	MODIFIER	MODIFIER	MODIFIER	MODIFIER	NONE
chr1	8894254	G	A	2437	79	0.848101	0	0,1,15,63	MODIFIER	MODIFIER	MODIFIER	MODIFIER	NONE
chr1	8963038	T	C	2106	63	0.952381	0	0,0,23,40	MODIFIER	MODIFIER	MODIFIER	MODIFIER	NONE
chr1	9451143	C	G	2363	63	1	0	0,0,18,45	MODIFIER	NONE	intergenic_region	Sntg1-Rrs1	n.9451143C>G
chr1	9546533	G	A	240	50	0.18	3	26,14,5,5	MODERATE	MODIFIER	MODIFIER	NONE	NONE
chr1	9546572	C	G	138	62	0.096774	7	37,19,2,4	MODERATE	MODIFIER	MODIFIER	NONE	NONE
chr1	9546588	A	T	116	62	0.080645	8	36,21,1,4	LOW	MODIFIER	MODIFIER	NONE	NONE
chr1	9546857	G	T	2109	792	0.117424	8	327,372,51,42	MODIFIER	MODIFIER	MODIFIER	NONE	NONE
chr1	9546876	C	T	1960	732	0.118852	19	260,381,50,41	MODIFIER	MODIFIER	MODIFIER	NONE	NONE
chr1	9549819	T	C	4624	131	0.961832	0	0,0,116,15	MODIFIER	MODIFIER	MODIFIER	NONE	NONE
chr1	9613290	A	G	3170	89	0.977528	0	0,0,64,25	MODIFIER	MODIFIER	NONE	NONE	intron_variant
chr1	9687691	T	G	1122	122	0.319672	4	21,61,7,33	LOW	LOW	NONE	NONE	synonymous_variant
chr1	9699861	G	A	3355	105	0.895238	0	0,0,64,41	MODIFIER	MODIFIER	NONE	NONE	intron_variant
chr1	9724699	A	G	5383	152	0.953947	0	0,0,79,73	MODERATE	NONE	missense_variant	Vcpip1	c.3446T>C
chr1	9746594	T	C	5738	171	0.94152	0	0,0,65,106	LOW	MODIFIER	NONE	NONE	synonymous_variant
chr1	9782066	C	A	3498	112	0.973214	0	0,0,81,31	MODIFIER	NONE	intergenic_region	1700034P13Rik-Sgk3	n.9782066C>A
chr1	9782191	C	G	3451	107	0.934579	0	0,0,28,79	MODIFIER	NONE	intergenic_region	1700034P13Rik-Sgk3	n.9782191C>G
chr1	9802484	A	G	3396	100	0.96	0	0,0,16,84	MODIFIER	MODIFIER	NONE	NONE	intron_variant
chr1	9802486	T	C	3209	94	0.93617	0	0,1,12,81	MODIFIER	MODIFIER	NONE	NONE	intron_variant
chr1	9884529	C	CT	2146	58	0.931035	2	2,2,35,19	MODIFIER	MODIFIER	MODIFIER	NONE	NONE
chr1	9884597	AT	A	4254	116	0.965517	2	2,2,74,38	MODIFIER	MODIFIER	MODIFIER	NONE	NONE
chr1	9884670	TATCGTATTTAAA	T	857	123	0.642276	8	23,22,29,50	MODIFIER	MODIFIER	MODIFIER	NONE	NONE
chr1	9884691	G	T	2982	93	0.967742	0	0,0,29,64	MODIFIER	MODIFIER	MODIFIER	NONE	NONE
chr1	9885780	T	C	2010	56	0.982143	0	0,0,7,49	MODIFIER	MODIFIER	MODIFIER	NONE	NONE
chr1	9888860	AT	A	3265	100	0.93	7	3,4,67,26	MODIFIER	MODIFIER	MODIFIER	NONE	NONE
chr1	9898664	G	A	3059	93	0.903226	0	0,0,74,19	MODIFIER	MODIFIER	MODIFIER	NONE	NONE
chr1	9898957	C	T	1881	54	0.944444	0	0,0,8,46	MODIFIER	MODIFIER	MODIFIER	NONE	NONE
chr1	9936965	T	TA	8886	303	0.90099	22	17,16,208,65	MODIFIER	NONE	intron_variant	Mcmdc2	c.1770-31_1770-30insA
chr1	9937100	G	A	7807	225	0.946667	0	0,0,46,178	MODERATE	MODIFIER	NONE	NONE	missense_variant
chr1	9940386	C	G	3804	107	0.962617	0	0,0,54,53	MODERATE	MODIFIER	MODIFIER	NONE	NONE
chr1	9944086	G	A	2099	61	0.934426	0	0,0,34,27	MODIFIER	MODIFIER	MODIFIER	NONE	NONE
chr1	10189617	T	G	887	98	0.316327	0	25,41,13,19	MODERATE	NONE	missense_variant	Arfgef1	c.1625A>C
chr1	10554000	G	GT	75	119	0.058824	4	89,22,7,0	MODIFIER	MODIFIER	NONE	NONE	intron_variant
chr1	10554000	GT	G	152	119	0.10084	0	87,20,10,2	MODIFIER	MODIFIER	NONE	NONE	intron_variant
chr1	10719615	G	A	4009	114	0.95614	0	0,0,60,54	MODERATE	LOW	MODIFIER	MODIFIER	NONE
chr1	10868897	TAAGGACATGAAGATC	T	1429	193	0.227979	5	85,67,29,15	MODIFIER	MODIFIER	NONE	NONE	upstream_gene_variant
chr1	10869311	T	TTGGACTTACAG	72	83	0.686747	0	40,36,29,28	MODIFIER	MODIFIER	NONE	NONE	upstream_gene_variant
chr1	10869314	C	T	94	81	0.814815	0	0,0,35,33	MODIFIER	MODIFIER	NONE	NONE	upstream_gene_variant
chr1	11064201	G	A	127	61	0.098361	14	49,6,3,3	MODIFIER	NONE	intron_variant	Prex2	c.190-1593G>A
chr1	11064233	A	G	96	94	0.053191	4	63,25,3,3	MODIFIER	NONE	intron_variant	Prex2	c.190-1561A>G
chr1	11064251	C	T	121	113	0.053097	1	66,41,3,3	MODIFIER	NONE	intron_variant	Prex2	c.190-1543C>T
chr1	11098546	A	G	1736	50	0.94	0	0,0,19,31	LOW	NONE	synonymous_variant	Prex2	c.765A>G
chr1	11098573	A	G	1983	56	0.964286	0	0,0,24,32	LOW	NONE	synonymous_variant	Prex2	c.792A>G
chr1	11098612	T	G	1821	53	0.924528	0	0,0,20,33	MODIFIER	NONE	intron_variant	Prex2	c.815+16T>G
chr1	11110438	C	T	2120	60	0.983333	0	0,0,20,40	MODIFIER	NONE	intron_variant	Prex2	c.1214+12C>T
chr1	11110456	A	G	1843	51	0.980392	0	0,0,11,40	MODIFIER	NONE	intron_variant	Prex2	c.1214+30A>G
chr1	11112677	G	A	2420	70	0.957143	0	0,0,67,3	MODIFIER	NONE	intron_variant	Prex2	c.1215-66G>A
chr1	11112788	C	T	6179	173	0.971098	0	0,0,75,98	LOW	NONE	synonymous_variant	Prex2	c.1260C>T
chr1	11123058	G	A	2740	79	0.962025	0	0,0,74,5	MODIFIER	NONE	intron_variant	Prex2	c.1316-63G>A
chr1	11123075	A	T	3530	99	0.969697	0	0,0,82,17	MODIFIER	NONE	intron_variant	Prex2	c.1316-46A>T
chr1	11123077	G	A	3570	101	0.970297	0	0,0,82,19	MODIFIER	NONE	intron_variant	Prex2	c.1316-44G>A
chr1	11123105	ATT	A	5404	143	0.979021	5	4,0,96,44	MODIFIER	NONE	intron_variant	Prex2	c.1316-15_1316-14delTT
chr1	11123275	G	A	2941	84	0.97619	0	0,0,8,76	MODIFIER	NONE	intron_variant	Prex2	c.1419+51G>A
chr1	11123822	G	A	4606	138	0.92029	0	0,0,68,70	LOW	NONE	synonymous_variant	Prex2	c.1428G>A
chr1	11149879	G	T	4421	124	0.975806	0	0,0,46,78	LOW	NONE	synonymous_variant	Prex2	c.2073G>T
chr1	11156366	C	CT	634	107	0.317757	1	9,23,11,23	MODIFIER	NONE	intron_variant	Prex2	c.2344+8_2344+9insT
chr1	11156366	C	CTT	776	107	0.373832	0	9,23,12,28	MODIFIER	NONE	intron_variant	Prex2	c.2344+8_2344+9insTT
chr1	11156400	T	C	2011	72	0.805556	6	1,0,16,55	MODIFIER	NONE	intron_variant	Prex2	c.2344+42T>C
chr1	11170680	A	G	3400	103	0.941748	0	0,0,49,54	MODERATE	NONE	missense_variant	Prex2	c.3011A>G
chr1	11193458	A	G	5224	149	0.95302	0	0,0,98,51	MODIFIER	NONE	intron_variant	Prex2	c.3701-55A>G
chr1	11193547	A	G	5535	159	0.955975	0	0,0,60,99	LOW	NONE	synonymous_variant	Prex2	c.3735A>G
chr1	11193621	G	C	1834	54	0.962963	0	0,0,4,50	MODIFIER	NONE	intron_variant	Prex2	c.3742+67G>C
chr1	11204033	T	C	3532	99	1	0	0,0,72,27	MODIFIER	NONE	intron_variant	Prex2	c.3961-33T>C
chr1	11204209	G	T	1792	50	0.96	0	0,0,3,47	MODIFIER	NONE	intron_variant	Prex2	c.4063+41G>T
chr1	11224039	A	G	10721	315	0.968254	0	0,0,146,169	MODIFIER	NONE	intron_variant	Prex2	c.4208-7643A>G
chr1	11933536	A	G	4423	128	0.9375	0	0,0,77,50	LOW	LOW	MODIFIER	NONE	NONE
chr1	11933628	A	G	2735	75	0.986667	0	0,0,16,58	MODIFIER	MODIFIER	MODIFIER	NONE	NONE
chr1	11933650	G	A	589	53	0.377358	0	5,28,3,17	MODIFIER	MODIFIER	MODIFIER	NONE	NONE
chr1	11933656	C	T	1798	51	0.980392	0	0,0,7,44	MODIFIER	MODIFIER	MODIFIER	NONE	NONE
chr1	12565588	C	G	156	613	0.016313	17	373,230,10,0	MODIFIER	NONE	intergenic_region	Mir6341-Gm17644	n.12565588C>G
chr1	12565593	T	A	155	619	0.016155	21	363,246,10,0	MODIFIER	NONE	intergenic_region	Mir6341-Gm17644	n.12565593T>A
chr1	12565608	G	A	151	621	0.017713	24	348,262,11,0	MODIFIER	NONE	intergenic_region	Mir6341-Gm17644	n.12565608G>A
chr1	12565615	G	A	147	626	0.017572	24	346,269,11,0	MODIFIER	NONE	intergenic_region	Mir6341-Gm17644	n.12565615G>A
chr1	12565634	G	A	172	646	0.021672	9	347,285,11,3	MODIFIER	NONE	intergenic_region	Mir6341-Gm17644	n.12565634G>A
chr1	12565664	A	G	142	743	0.021534	3	403,324,7,9	MODIFIER	NONE	intergenic_region	Mir6341-Gm17644	n.12565664A>G
chr1	12565672	C	A	90	739	0.014885	24	401,326,1,10	MODIFIER	NONE	intergenic_region	Mir6341-Gm17644	n.12565672C>A
chr1	12565696	C	A	1164	819	0.091575	65	390,351,64,14	MODIFIER	NONE	intergenic_region	Mir6341-Gm17644	n.12565696C>A
chr1	12565703	A	G	85	845	0.013018	39	470,364,0,11	MODIFIER	NONE	intergenic_region	Mir6341-Gm17644	n.12565703A>G
chr1	12565770	G	A	3019	940	0.146809	5	368,429,59,83	MODIFIER	NONE	intergenic_region	Mir6341-Gm17644	n.12565770G>A
chr1	12565781	A	T	2432	900	0.126667	17	340,441,38,81	MODIFIER	NONE	intergenic_region	Mir6341-Gm17644	n.12565781A>T
chr1	12565815	A	G	285	701	0.024251	40	263,417,0,21	MODIFIER	NONE	intergenic_region	Mir6341-Gm17644	n.12565815A>G
chr1	12565819	C	T	292	696	0.025862	40	262,413,0,20	MODIFIER	NONE	intergenic_region	Mir6341-Gm17644	n.12565819C>T
chr1	12565822	C	T	287	691	0.026049	37	255,416,0,20	MODIFIER	NONE	intergenic_region	Mir6341-Gm17644	n.12565822C>T
chr1	12565826	A	G	343	669	0.029895	37	246,403,0,20	MODIFIER	NONE	intergenic_region	Mir6341-Gm17644	n.12565826A>G
chr1	12598747	G	A	629	74	0.310811	6	17,33,12,12	MODIFIER	NONE	intergenic_region	Mir6341-Gm17644	n.12598747G>A
chr1	12881104	A	G	1735	52	0.923077	0	0,0,43,9	MODIFIER	NONE	intron_variant	Slco5a1	c.1785+189T>C
chr1	12881147	G	A	2953	89	0.921348	0	0,0,57,32	MODIFIER	NONE	intron_variant	Slco5a1	c.1785+146C>T
chr1	12881209	AGTC	A	3062	104	0.942308	5	2,6,49,49	MODIFIER	NONE	intron_variant	Slco5a1	c.1785+81_1785+83delGAC
chr1	12920999	T	C	1916	55	0.945455	0	0,0,44,11	MODIFIER	NONE	intron_variant	Slco5a1	c.1426+39A>G
chr1	12921010	T	A	2116	61	0.983607	0	0,0,47,14	MODIFIER	NONE	intron_variant	Slco5a1	c.1426+28A>T
chr1	12944115	GGA	G	13044	386	0.860104	38	40,17,142,190	LOW	NONE	splice_region_variant&intron_variant	Slco5a1	c.917-5_917-4delTC
chr1	12944174	GA	G	7896	232	0.974138	17	9,8,53,173	MODIFIER	NONE	intron_variant	Slco5a1	c.917-63delT
chr1	12989758	T	C	2606	75	0.946667	0	0,0,28,47	LOW	NONE	synonymous_variant	Slco5a1	c.738A>G
chr1	12990418	C	T	7601	220	0.936364	0	0,0,125,95	LOW	NONE	synonymous_variant	Slco5a1	c.78G>A
chr1	13062029	A	C	4892	142	0.957747	0	0,0,99,43	MODIFIER	NONE	intergenic_region	Slco5a1-Prdm14	n.13062029A>C
chr1	13114284	G	A	4802	134	0.977612	0	0,0,82,51	LOW	NONE	synonymous_variant	Prdm14	c.1662C>T
chr1	13114401	G	A	3467	101	0.940594	0	0,0,41,60	LOW	NONE	synonymous_variant	Prdm14	c.1545C>T
chr1	13122443	A	G	3223	91	0.967033	0	0,0,51,40	LOW	NONE	synonymous_variant	Prdm14	c.1071T>C
chr1	13122474	C	T	3604	103	0.970874	0	0,0,67,36	MODERATE	NONE	missense_variant	Prdm14	c.1040G>A
chr1	13122620	A	G	4131	118	0.957627	0	0,0,42,76	LOW	NONE	synonymous_variant	Prdm14	c.894T>C
chr1	13122645	C	G	2990	87	0.965517	0	0,0,27,60	MODIFIER	NONE	intron_variant	Prdm14	c.883-14G>C
chr1	13122650	A	G	2830	80	0.9625	0	0,0,25,55	MODIFIER	NONE	intron_variant	Prdm14	c.883-19T>C
chr1	13122656	GGTT	G	294	70	0.214286	1	11,20,4,11	MODIFIER	NONE	intron_variant	Prdm14	c.883-28_883-26delAAC
chr1	13122656	GGTTTT	G	128	70	0.357143	2	11,20,7,18	MODIFIER	NONE	intron_variant	Prdm14	c.883-30_883-26delAAAAC
chr1	13124337	C	T	2530	108	0.675926	0	0,0,77,30	MODIFIER	NONE	intron_variant	Prdm14	c.882+26G>A
chr1	13124567	G	C	2333	68	0.941176	0	0,0,40,28	MODIFIER	NONE	intron_variant	Prdm14	c.725-47C>G
chr1	13125581	G	A	2438	67	0.970149	0	0,0,35,32	LOW	NONE	synonymous_variant	Prdm14	c.255C>T
chr1	13125617	A	C	2454	74	0.918919	0	0,0,42,32	LOW	NONE	synonymous_variant	Prdm14	c.219T>G
chr1	13125649	C	T	3810	112	0.9375	0	0,0,66,46	MODERATE	NONE	missense_variant	Prdm14	c.187G>A
chr1	13125821	G	A	3097	90	0.933333	0	0,0,31,59	LOW	NONE	synonymous_variant	Prdm14	c.15C>T
chr1	13125845	A	G	2107	61	0.967213	0	0,0,14,47	MODIFIER	NONE	5_prime_UTR_variant	Prdm14	c.-10T>C
chr1	13149068	T	C	2898	85	0.929412	0	0,0,35,50	LOW	LOW	NONE	NONE	synonymous_variant
chr1	13149111	TAAAAAC	T	2109	69	0.797101	4	7,8,18,37	LOW	LOW	NONE	NONE	splice_region_variant&intron_variant
chr1	13150819	A	G	1690	50	0.92	0	0,0,27,23	LOW	LOW	NONE	NONE	synonymous_variant
chr1	13150850	T	C	2335	66	0.969697	0	0,0,39,27	LOW	LOW	NONE	NONE	synonymous_variant
chr1	13150862	A	G	2222	68	0.897059	0	0,0,40,28	LOW	LOW	NONE	NONE	synonymous_variant
chr1	13150928	T	G	1689	51	0.980392	0	0,0,13,38	MODIFIER	MODIFIER	NONE	NONE	intron_variant
chr1	13152332	C	A	4163	119	0.983193	0	0,0,96,23	MODIFIER	MODIFIER	NONE	NONE	intron_variant
chr1	13152854	C	T	2799	78	0.974359	0	0,0,39,39	LOW	LOW	NONE	NONE	synonymous_variant
chr1	13162047	T	TA	2316	64	0.96875	0	2,0,47,15	MODIFIER	MODIFIER	NONE	NONE	intron_variant
chr1	13174035	T	C	2681	73	0.986301	0	0,0,61,12	MODIFIER	MODIFIER	NONE	NONE	intron_variant
chr1	13175111	T	C	8894	261	0.938697	0	0,0,119,142	LOW	LOW	NONE	NONE	synonymous_variant
chr1	13189989	C	T	2186	65	0.969231	0	0,0,63,2	MODIFIER	MODIFIER	NONE	NONE	intron_variant
chr1	13224556	A	G	9393	269	0.959108	0	0,0,203,66	MODIFIER	MODIFIER	NONE	NONE	intron_variant
chr1	13224598	G	A	15209	431	0.953596	0	0,0,272,159	MODIFIER	MODIFIER	NONE	NONE	intron_variant
chr1	13569428	A	G	2314	66	0.954545	0	0,0,48,18	MODIFIER	NONE	intron_variant	Tram1	c.1051+43T>C
chr1	13650857	T	A	2586	81	0.901235	0	0,0,44,37	LOW	NONE	synonymous_variant	Lactb2	c.150A>T
chr1	13650863	A	G	2630	76	0.960526	0	0,0,40,36	LOW	NONE	synonymous_variant	Lactb2	c.144T>C
chr1	13700937	G	A	7765	223	0.946188	0	0,0,98,125	MODERATE	NONE	missense_variant	Xkr9	c.676G>A
chr1	13786778	G	A	2548	84	0.940476	0	0,0,81,3	MODIFIER	NONE	non_coding_transcript_exon_variant	Gm5523	n.152C>T
chr1	13786793	C	T	4331	128	0.984375	0	0,0,114,14	MODIFIER	NONE	non_coding_transcript_exon_variant	Gm5523	n.137G>A
chr1	13786796	C	T	4573	138	0.978261	0	0,0,121,17	MODIFIER	NONE	non_coding_transcript_exon_variant	Gm5523	n.134G>A
chr1	13786806	T	G	5530	165	0.963636	0	0,0,134,31	MODIFIER	NONE	non_coding_transcript_exon_variant	Gm5523	n.124A>C
chr1	13786858	C	G	10078	291	0.955326	0	0,0,174,117	MODIFIER	NONE	non_coding_transcript_exon_variant	Gm5523	n.72G>C
chr1	13786859	A	G	10067	290	0.958621	0	0,0,172,118	MODIFIER	NONE	non_coding_transcript_exon_variant	Gm5523	n.71T>C
chr1	13786931	G	GA	5372	257	0.657588	14	37,54,46,123	MODIFIER	MODIFIER	NONE	NONE	upstream_gene_variant
chr1	13786936	G	GGAGGAGCCA	4345	160	0.9875	4	0,5,40,118	MODIFIER	MODIFIER	NONE	NONE	upstream_gene_variant
chr1	13786969	T	A	4637	139	0.94964	0	0,0,14,125	MODIFIER	MODIFIER	NONE	NONE	upstream_gene_variant
chr1	14229456	C	G	5148	150	0.94	0	0,0,105,45	MODIFIER	MODIFIER	MODIFIER	NONE	NONE
chr1	14839251	CT	C	114	99	0.121212	9	86,0,11,1	MODIFIER	NONE	intergenic_region	Msc-Trpa1	n.14839252delT
chr1	15268916	G	T	287	53	0.320755	20	24,11,18,0	MODIFIER	NONE	intergenic_region	Trpa1-Kcnb2	n.15268916G>T
chr1	15268922	G	A	376	65	0.338462	5	24,14,21,6	MODIFIER	NONE	intergenic_region	Trpa1-Kcnb2	n.15268922G>A
chr1	15268983	C	A	517	63	0.444444	9	9,25,14,15	MODIFIER	NONE	intergenic_region	Trpa1-Kcnb2	n.15268983C>A
chr1	15710459	T	A	2415	67	0.970149	0	0,0,43,24	MODERATE	NONE	missense_variant	Kcnb2	c.1554T>A
chr1	15710823	A	C	1414	123	0.390244	0	25,47,17,34	MODERATE	NONE	missense_variant	Kcnb2	c.1918A>C
chr1	15760885	G	GTAGTAGTAA	982	109	0.311927	54	30,48,0,34	MODIFIER	NONE	intergenic_region	Kcnb2-Terf1	n.15760885_15760886insTAGTAGTAA
chr1	15760885	G	A	91	112	0.071429	9	30,73,0,9	MODIFIER	NONE	intergenic_region	Kcnb2-Terf1	n.15760885G>A
chr1	15760894	G	A	864	97	0.463918	70	0,50,19,28	MODIFIER	NONE	intergenic_region	Kcnb2-Terf1	n.15760894G>A
chr1	15805657	G	T	2280	64	0.96875	0	0,0,43,21	LOW	LOW	MODIFIER	MODIFIER	NONE
chr1	15805658	G	A	2278	64	0.96875	0	0,0,43,21	MODIFIER	MODIFIER	NONE	NONE	5_prime_UTR_variant
chr1	15805911	T	C	1838	58	0.913793	0	0,0,26,32	LOW	LOW	NONE	NONE	synonymous_variant
chr1	16050866	T	G	1948	63	0.920635	0	0,0,42,21	MODIFIER	NONE	intergenic_region	Sbspon-4930444P10Rik	n.16050866T>G
chr1	16050885	T	C	3291	96	0.96875	0	0,0,54,42	MODIFIER	NONE	intergenic_region	Sbspon-4930444P10Rik	n.16050885T>C
chr1	16050967	T	C	2407	73	0.90411	0	0,0,15,58	MODIFIER	NONE	intergenic_region	Sbspon-4930444P10Rik	n.16050967T>C
chr1	16053308	G	A	2697	77	0.948052	0	0,0,58,19	MODIFIER	NONE	intergenic_region	Sbspon-4930444P10Rik	n.16053308G>A
chr1	16053458	C	T	5635	169	0.940828	0	0,0,96,73	MODIFIER	NONE	intergenic_region	Sbspon-4930444P10Rik	n.16053458C>T
chr1	16053463	A	G	5697	168	0.952381	0	0,0,99,69	MODIFIER	NONE	intergenic_region	Sbspon-4930444P10Rik	n.16053463A>G
chr1	16053468	C	A	5750	168	0.964286	0	0,0,97,71	MODIFIER	NONE	intergenic_region	Sbspon-4930444P10Rik	n.16053468C>A
chr1	16053508	A	G	6031	180	0.961111	3	0,1,92,87	MODIFIER	NONE	intergenic_region	Sbspon-4930444P10Rik	n.16053508A>G
chr1	16053578	A	C	5642	166	0.951807	0	0,0,60,106	MODIFIER	NONE	intergenic_region	Sbspon-4930444P10Rik	n.16053578A>C
chr1	16053585	CA	C	3874	162	0.87037	3	10,13,48,93	MODIFIER	NONE	intergenic_region	Sbspon-4930444P10Rik	n.16053586delA
chr1	16053626	T	A	2980	91	0.978022	0	0,0,13,78	MODIFIER	NONE	intergenic_region	Sbspon-4930444P10Rik	n.16053626T>A
chr1	16053640	A	G	2008	66	0.924242	0	0,0,2,63	MODIFIER	NONE	intergenic_region	Sbspon-4930444P10Rik	n.16053640A>G
chr1	16053894	C	T	1817	52	1	0	0,0,18,34	MODIFIER	NONE	intergenic_region	Sbspon-4930444P10Rik	n.16053894C>T
chr1	16066071	T	C	5717	160	0.975	0	0,0,117,43	MODIFIER	MODIFIER	NONE	NONE	3_prime_UTR_variant
chr1	16082445	T	TTC	131	101	0.049505	2	22,75,0,5	MODIFIER	MODIFIER	NONE	NONE	5_prime_UTR_variant
chr1	16131171	C	G	8992	263	0.939164	0	0,0,158,105	LOW	NONE	synonymous_variant	Rdh10	c.867C>G
chr1	16463256	AAC	A	318	49	0.204082	7	9,30,0,10	MODIFIER	MODIFIER	NONE	NONE	intron_variant
chr1	16647967	G	T	1536	53	0.830189	0	0,0,17,36	MODIFIER	MODIFIER	NONE	NONE	5_prime_UTR_variant
chr1	16663346	T	C	2263	65	0.953846	0	0,0,59,6	MODIFIER	MODIFIER	MODIFIER	MODIFIER	NONE
chr1	16663716	G	T	4462	126	0.968254	0	0,0,25,101	MODIFIER	MODIFIER	MODIFIER	MODIFIER	NONE
chr1	16665448	C	G	1673	51	0.941176	0	0,0,17,34	LOW	LOW	MODIFIER	NONE	NONE
chr1	16667687	A	G	4198	124	0.935484	0	0,0,80,44	MODERATE	MODERATE	NONE	NONE	missense_variant
chr1	16706287	C	T	2746	76	0.986842	0	0,0,12,64	MODIFIER	MODIFIER	NONE	NONE	intron_variant
chr1	16709549	TAC	T	104	73	0.054795	0	14,56,0,4	MODIFIER	MODIFIER	NONE	NONE	3_prime_UTR_variant
chr1	16758369	TC	T	1737	63	0.888889	4	0,7,12,44	MODIFIER	NONE	intergenic_region	Ly96-Jph1	n.16758370delC
chr1	16768444	A	C	1962	60	0.9	0	0,0,30,30	MODIFIER	NONE	intergenic_region	Ly96-Jph1	n.16768444A>C
chr1	16768820	C	T	1578	55	0.781818	0	0,0,36,18	MODIFIER	NONE	intergenic_region	Ly96-Jph1	n.16768820C>T
chr1	16768837	C	T	2135	65	0.907692	0	0,0,40,25	MODIFIER	NONE	intergenic_region	Ly96-Jph1	n.16768837C>T
chr1	16768964	C	G	3506	116	0.913793	0	0,0,67,49	MODIFIER	NONE	intergenic_region	Ly96-Jph1	n.16768964C>G
chr1	16769166	C	G	4737	151	0.887417	0	4,4,68,75	MODIFIER	NONE	intergenic_region	Ly96-Jph1	n.16769166C>G
chr1	16769190	G	T	4014	152	0.769737	1	4,4,60,84	MODIFIER	NONE	intergenic_region	Ly96-Jph1	n.16769190G>T
chr1	16769945	T	C	2813	85	0.929412	0	0,0,47,38	MODIFIER	NONE	intergenic_region	Ly96-Jph1	n.16769945T>C
chr1	16769997	G	A	3024	90	0.966667	0	0,0,38,52	MODIFIER	NONE	intergenic_region	Ly96-Jph1	n.16769997G>A
chr1	16770058	T	G	2501	70	0.985714	0	0,0,21,49	MODIFIER	NONE	intergenic_region	Ly96-Jph1	n.16770058T>G
chr1	17394794	GA	G	108	69	0.115942	3	40,21,4,4	MODIFIER	NONE	intergenic_region	Gdap1-Pi15	n.17394795delA
chr1	17752818	CT	C	134	107	0.11215	1	81,11,10,2	MODIFIER	NONE	intron_variant	Crispld1	c.1128-19delT
chr1	19153718	TG	T	370	173	0.179191	19	86,82,8,23	MODIFIER	NONE	intron_variant	Tfap2d	c.1139+5302delG
chr1	19153719	G	GCCC	78	174	0.034483	6	65,105,4,2	MODIFIER	NONE	intron_variant	Tfap2d	c.1139+5302_1139+5303insCCC
chr1	19234239	G	A	482	90	0.2	7	31,39,5,15	LOW	LOW	LOW	NONE	NONE
chr1	19331023	G	A	5424	153	0.954248	0	0,0,82,71	MODIFIER	NONE	intergenic_region	Tfap2b-Pkhd1	n.19331023G>A
chr1	19331210	G	A	3295	92	0.98913	0	0,0,43,49	MODIFIER	NONE	intergenic_region	Tfap2b-Pkhd1	n.19331210G>A
chr1	19331410	ACAGT	A	1974	54	0.944444	2	2,2,18,33	MODIFIER	NONE	intergenic_region	Tfap2b-Pkhd1	n.19331411_19331414delCAGT
chr1	19331827	C	T	785	103	0.271845	0	36,37,15,15	MODIFIER	NONE	intergenic_region	Tfap2b-Pkhd1	n.19331827C>T
chr1	19332239	C	T	1910	55	0.963636	0	0,0,32,23	MODIFIER	NONE	intergenic_region	Tfap2b-Pkhd1	n.19332239C>T
chr1	19332343	G	A	742	72	0.347222	6	19,26,16,11	MODIFIER	NONE	intergenic_region	Tfap2b-Pkhd1	n.19332343G>A
chr1	19332585	A	ATG	183	55	0.109091	0	29,19,4,2	MODIFIER	NONE	intergenic_region	Tfap2b-Pkhd1	n.19332585_19332586insTG
chr1	20058321	C	T	2093	68	0.867647	2	2,0,41,25	MODERATE	NONE	missense_variant	Pkhd1	c.12157G>A
chr1	20058325	A	G	2307	68	0.941176	0	0,0,44,24	LOW	NONE	synonymous_variant	Pkhd1	c.12153T>C
chr1	20058333	T	C	2446	67	0.985075	0	0,0,43,24	MODERATE	NONE	missense_variant	Pkhd1	c.12145A>G
chr1	20058600	T	C	2616	72	0.972222	0	0,0,44,28	MODERATE	NONE	missense_variant	Pkhd1	c.11878A>G
chr1	20058611	T	C	2786	83	0.939759	0	0,0,49,34	MODERATE	NONE	missense_variant	Pkhd1	c.11867A>G
chr1	20058616	A	G	2882	87	0.931035	0	0,0,51,36	LOW	NONE	synonymous_variant	Pkhd1	c.11862T>C
chr1	20169641	C	A	3099	90	0.944444	0	0,0,51,39	MODIFIER	NONE	intron_variant	Pkhd1	c.10135+28377G>T
chr1	20169899	T	C	2724	80	0.9375	0	0,0,31,49	MODIFIER	NONE	intron_variant	Pkhd1	c.10135+28119A>G
chr1	20198079	G	A	5330	152	0.960526	0	0,0,75,77	LOW	NONE	synonymous_variant	Pkhd1	c.10074C>T
chr1	20200552	C	T	4943	134	0.985075	0	0,0,61,73	MODERATE	NONE	missense_variant	Pkhd1	c.9776G>A
chr1	20200626	G	A	2188	64	0.96875	0	0,0,15,49	LOW	NONE	synonymous_variant	Pkhd1	c.9702C>T
chr1	20200839	G	A	2585	73	0.958904	0	0,0,40,33	LOW	NONE	synonymous_variant	Pkhd1	c.9489C>T
chr1	20200989	A	G	3319	93	0.967742	0	0,0,62,31	LOW	NONE	synonymous_variant	Pkhd1	c.9339T>C
chr1	20201211	G	A	5080	145	0.972414	0	0,0,46,99	LOW	NONE	synonymous_variant	Pkhd1	c.9117C>T
chr1	20201241	G	C	3166	88	0.977273	0	0,0,21,67	LOW	NONE	synonymous_variant	Pkhd1	c.9087C>G
chr1	20201277	A	G	2806	76	1	0	0,0,30,46	LOW	NONE	synonymous_variant	Pkhd1	c.9051T>C
chr1	20201410	A	G	1852	54	0.925926	0	0,0,14,39	MODIFIER	NONE	intron_variant	Pkhd1	c.8933-15T>C
chr1	20209281	C	T	1956	58	0.913793	0	0,0,27,31	MODERATE	NONE	missense_variant	Pkhd1	c.8812G>A
chr1	20209282	C	T	2127	59	0.983051	0	0,0,27,32	LOW	NONE	synonymous_variant	Pkhd1	c.8811G>A
chr1	20209301	G	A	2051	61	0.918033	0	0,0,24,37	MODERATE	NONE	missense_variant	Pkhd1	c.8792C>T
chr1	20209344	A	G	1688	51	0.901961	0	0,0,15,36	MODIFIER	NONE	intron_variant	Pkhd1	c.8780-31T>C
chr1	20358873	G	A	2087	57	1	0	0,0,34,23	LOW	MODIFIER	NONE	NONE	synonymous_variant
chr1	20358889	G	T	2353	68	0.985294	0	0,0,41,27	MODERATE	MODIFIER	NONE	NONE	missense_variant
chr1	20391481	C	T	2661	74	0.986486	0	0,0,41,33	LOW	MODIFIER	NONE	NONE	synonymous_variant
chr1	20391952	T	C	1915	53	0.981132	0	0,0,48,5	MODIFIER	MODIFIER	NONE	NONE	intron_variant
chr1	20444159	T	TA	106	53	0.075472	0	49,0,4,0	MODIFIER	NONE	intron_variant	Pkhd1	c.5896+6061_5896+6062insT
chr1	20444177	A	T	188	85	0.117647	0	73,2,10,0	MODIFIER	NONE	intron_variant	Pkhd1	c.5896+6044T>A
chr1	20444185	A	C	236	98	0.112245	0	85,2,11,0	MODIFIER	NONE	intron_variant	Pkhd1	c.5896+6036T>G
chr1	20444252	T	C	6316	189	0.968254	0	0,0,135,54	MODIFIER	NONE	intron_variant	Pkhd1	c.5896+5969A>G
chr1	20444273	G	A	498	238	0.113445	0	137,74,18,9	MODIFIER	NONE	intron_variant	Pkhd1	c.5896+5948C>T
chr1	20444277	G	T	7299	238	0.945378	0	0,0,153,84	MODIFIER	NONE	intron_variant	Pkhd1	c.5896+5944C>A
chr1	20444397	T	G	8939	274	0.948905	0	0,0,97,177	MODIFIER	NONE	intron_variant	Pkhd1	c.5896+5824A>C
chr1	20444409	G	T	102	266	0.030075	12	85,172,0,9	MODIFIER	NONE	intron_variant	Pkhd1	c.5896+5812C>A
chr1	20444732	T	C	970	132	0.272727	4	44,51,13,24	MODIFIER	NONE	intron_variant	Pkhd1	c.5896+5489A>G
chr1	20520142	T	G	2721	81	0.91358	0	0,0,67,14	MODIFIER	NONE	intron_variant	Pkhd1	c.5368+12A>C
chr1	20520157	G	C	3267	97	0.907216	0	0,0,82,15	MODERATE	NONE	missense_variant	Pkhd1	c.5365C>G
chr1	20520263	T	G	7289	214	0.934579	0	0,0,117,97	LOW	NONE	synonymous_variant	Pkhd1	c.5259A>C
chr1	20520377	T	C	3665	104	1	0	0,0,18,86	MODIFIER	NONE	intron_variant	Pkhd1	c.5225-80A>G
chr1	20520381	A	G	3014	89	0.932584	0	0,0,13,76	MODIFIER	NONE	intron_variant	Pkhd1	c.5225-84T>C
chr1	20522938	A	G	4111	115	0.973913	0	0,0,72,43	LOW	NONE	synonymous_variant	Pkhd1	c.4950T>C
chr1	20522979	T	C	4471	133	0.93985	0	0,0,74,59	MODERATE	NONE	missense_variant	Pkhd1	c.4909A>G
chr1	20523019	A	G	5340	158	0.936709	0	0,0,89,69	LOW	NONE	synonymous_variant	Pkhd1	c.4869T>C
chr1	20523048	A	T	6493	183	0.967213	0	0,0,84,99	MODERATE	NONE	missense_variant	Pkhd1	c.4840T>A
chr1	20523125	G	A	4175	119	0.94958	0	0,0,41,78	MODERATE	NONE	missense_variant	Pkhd1	c.4763C>T
chr1	20523313	T	C	2920	83	0.963855	0	0,0,48,35	LOW	NONE	synonymous_variant	Pkhd1	c.4575A>G
chr1	20523319	G	A	2801	85	0.894118	0	0,0,47,38	LOW	NONE	synonymous_variant	Pkhd1	c.4569C>T
chr1	20523440	A	T	2789	78	0.974359	0	0,0,35,43	MODERATE	NONE	missense_variant	Pkhd1	c.4448T>A
chr1	20523851	G	A	4390	122	0.983607	0	0,0,49,73	MODERATE	NONE	missense_variant	Pkhd1	c.4037C>T
chr1	20523855	A	G	4165	120	0.941667	0	0,1,49,70	LOW	NONE	synonymous_variant	Pkhd1	c.4033T>C
chr1	20523967	C	T	4969	141	0.964539	0	0,0,71,70	LOW	NONE	synonymous_variant	Pkhd1	c.3921G>A
chr1	20524097	A	G	2861	78	1	0	0,0,37,41	MODERATE	NONE	missense_variant	Pkhd1	c.3791T>C
chr1	20533773	A	G	2737	81	0.938272	0	0,0,65,14	MODIFIER	NONE	intron_variant	Pkhd1	c.3622+70T>C
chr1	20533828	GC	G	6063	160	0.98125	5	1,2,101,56	MODIFIER	NONE	intron_variant	Pkhd1	c.3622+14delG
chr1	20537401	T	A	2615	75	0.973333	0	0,0,31,44	MODERATE	NONE	missense_variant	Pkhd1	c.3230A>T
chr1	20553372	T	G	2749	77	0.974026	0	0,0,64,13	MODIFIER	NONE	intron_variant	Pkhd1	c.2401+97A>C
chr1	20553472	G	T	6194	173	0.971098	0	0,0,92,81	MODERATE	NONE	missense_variant	Pkhd1	c.2398C>A
chr1	20558674	G	A	9572	279	0.946237	0	0,0,198,81	MODERATE	NONE	missense_variant	Pkhd1	c.2048C>T
chr1	20558708	T	G	12723	357	0.955182	0	0,0,201,156	MODERATE	NONE	missense_variant	Pkhd1	c.2014A>C
chr1	20558786	G	A	9780	284	0.93662	0	0,0,100,184	MODIFIER	NONE	intron_variant	Pkhd1	c.1959-23C>T
chr1	20562293	T	G	2086	58	0.982759	0	0,0,42,16	MODIFIER	NONE	intron_variant	Pkhd1	c.1830+67A>C
chr1	20562302	T	C	2401	67	0.970149	0	0,0,48,19	MODIFIER	NONE	intron_variant	Pkhd1	c.1830+58A>G
chr1	20562376	A	G	3035	86	0.976744	0	0,0,40,46	MODERATE	NONE	missense_variant	Pkhd1	c.1814T>C
chr1	20563652	T	C	2985	83	0.987952	0	0,0,48,35	MODERATE	NONE	missense_variant	Pkhd1	c.1658A>G
chr1	20565626	A	G	2233	63	0.952381	0	0,0,50,13	LOW	NONE	synonymous_variant	Pkhd1	c.1479T>C
chr1	20565904	CAGCATTATGA	C	1305	49	0.755102	1	4,9,8,29	MODIFIER	NONE	intron_variant	Pkhd1	c.1228-37_1228-28delTCATAATGCT
chr1	20566686	C	T	2112	61	0.95082	0	0,0,59,2	MODIFIER	NONE	intron_variant	Pkhd1	c.1227+72G>A
chr1	20566716	G	C	3430	94	0.978723	0	0,0,84,10	MODIFIER	NONE	intron_variant	Pkhd1	c.1227+42C>G
chr1	20567625	T	C	4018	115	0.956522	0	0,0,46,69	MODIFIER	NONE	intron_variant	Pkhd1	c.971-36A>G
chr1	20584006	CT	C	936	177	0.79096	5	28,8,96,44	MODIFIER	NONE	intron_variant	Pkhd1	c.772+53delA
chr1	20584012	A	G	1391	183	0.814208	0	0,0,109,47	MODIFIER	NONE	intron_variant	Pkhd1	c.772+48T>C
chr1	20585717	G	GA	3468	135	0.822222	29	17,8,35,76	LOW	NONE	splice_region_variant&intron_variant	Pkhd1	c.597-7_597-6insT
chr1	20612633	G	C	1718	52	0.903846	0	0,0,42,9	MODIFIER	NONE	intron_variant	Pkhd1	c.275+69C>G
chr1	20613344	AT	A	3228	82	1	0	0,0,72,10	MODIFIER	NONE	intron_variant	Pkhd1	c.133+50delA
chr1	20613358	C	A	3814	108	0.953704	0	0,0,91,17	MODIFIER	NONE	intron_variant	Pkhd1	c.133+37G>T
chr1	20613379	G	A	4964	144	0.958333	0	0,0,108,36	MODIFIER	NONE	intron_variant	Pkhd1	c.133+16C>T
chr1	20613423	T	C	5977	181	0.911602	0	0,0,97,84	LOW	NONE	synonymous_variant	Pkhd1	c.105A>G
chr1	20613452	A	T	5589	160	0.94375	0	0,0,60,100	MODERATE	NONE	missense_variant	Pkhd1	c.76T>A
chr1	20613517	T	C	2512	75	0.92	0	0,0,4,71	MODIFIER	NONE	intron_variant	Pkhd1	c.56-45A>G
chr1	20615234	C	A	3820	107	0.971963	0	0,0,83,24	MODIFIER	NONE	intron_variant	Pkhd1	c.55+35G>T
chr1	20615385	T	G	1984	63	0.888889	0	0,0,7,55	MODIFIER	NONE	5_prime_UTR_variant	Pkhd1	c.-62A>C
chr1	20615387	T	C	1972	61	0.885246	0	0,0,7,54	MODIFIER	NONE	5_prime_UTR_variant	Pkhd1	c.-64A>G
chr1	20777791	C	T	4034	114	0.973684	0	0,0,69,44	LOW	NONE	synonymous_variant	Il17f	c.462G>A
chr1	20784227	C	A	3605	101	0.970297	0	0,0,30,71	MODIFIER	NONE	5_prime_UTR_variant	Il17f	c.-28G>T
chr1	20803546	C	A	2911	84	0.940476	0	0,0,35,48	LOW	NONE	synonymous_variant	Mcm3	c.2349G>T
chr1	20804745	TGGGGTAATCAC	T	3940	121	0.884298	6	14,0,90,17	MODIFIER	NONE	intron_variant	Mcm3	c.2240+61_2240+71delGTGATTACCCC
chr1	20805148	C	T	2701	77	0.987013	0	0,0,70,7	MODIFIER	NONE	intron_variant	Mcm3	c.2149+115G>A
chr1	20805379	T	A	4558	129	0.984496	0	0,0,20,109	MODIFIER	NONE	intron_variant	Mcm3	c.2073-40A>T
chr1	20810101	C	A	3160	89	0.966292	0	0,0,40,49	LOW	NONE	synonymous_variant	Mcm3	c.1506G>T
chr1	20811910	A	G	2221	64	0.953125	0	0,0,59,5	MODIFIER	NONE	intron_variant	Mcm3	c.1374+55T>C
chr1	20812016	C	T	6695	200	0.92	0	0,0,101,99	LOW	NONE	synonymous_variant	Mcm3	c.1323G>A
chr1	20812735	CCA	C	2137	80	0.7625	16	13,7,21,40	MODIFIER	NONE	intron_variant	Mcm3	c.1034-42_1034-41delTG
chr1	20812889	C	T	2018	55	1	0	0,0,42,13	MODIFIER	NONE	intron_variant	Mcm3	c.1033+72G>A
chr1	20812915	A	G	2439	69	0.971014	0	0,0,47,22	MODIFIER	NONE	intron_variant	Mcm3	c.1033+46T>C
chr1	20814303	G	GA	1427	52	0.923077	0	4,0,48,0	MODIFIER	NONE	intron_variant	Mcm3	c.879+95_879+96insT
chr1	20814523	A	AGGTGAAGCCC	362	67	0.492537	10	13,22,20,13	MODIFIER	NONE	intron_variant	Mcm3	c.771-17_771-16insGGGCTTCACC
chr1	20814533	T	C	1109	65	0.923077	0	0,0,42,23	MODIFIER	NONE	intron_variant	Mcm3	c.771-26A>G
chr1	20814554	G	T	2993	85	0.964706	0	0,0,67,18	MODIFIER	NONE	intron_variant	Mcm3	c.771-47C>A
chr1	20814594	C	A	3865	116	0.922414	0	0,0,98,18	MODIFIER	NONE	intron_variant	Mcm3	c.771-87G>T
chr1	20814637	G	A	7050	203	0.945813	0	0,0,128,75	MODIFIER	NONE	intron_variant	Mcm3	c.770+52C>T
chr1	20814805	A	G	7053	204	0.960784	0	0,0,75,129	LOW	NONE	synonymous_variant	Mcm3	c.654T>C
chr1	20814811	A	G	6522	198	0.939394	0	0,0,77,121	LOW	NONE	synonymous_variant	Mcm3	c.648T>C
chr1	20814871	A	G	4457	136	0.897059	0	0,0,53,83	LOW	NONE	synonymous_variant	Mcm3	c.588T>C
chr1	20814932	A	AGG	160	102	0.058824	4	29,67,3,3	LOW	NONE	splice_region_variant&intron_variant	Mcm3	c.532-6_532-5insCC
chr1	20814934	G	GGGA	1850	96	0.8125	3	9,14,23,55	LOW	NONE	splice_region_variant&intron_variant	Mcm3	c.532-8_532-7insTCC
chr1	20814958	A	G	2434	75	0.88	0	0,0,15,60	MODIFIER	NONE	intron_variant	Mcm3	c.532-31T>C
chr1	20814984	T	C	1785	51	0.960784	0	0,0,7,44	MODIFIER	NONE	intron_variant	Mcm3	c.532-57A>G
chr1	20817310	G	A	3441	93	1	0	0,0,40,53	LOW	NONE	synonymous_variant	Mcm3	c.333C>T
chr1	20817724	A	G	2083	60	0.966667	0	0,0,56,4	MODIFIER	NONE	intron_variant	Mcm3	c.191+69T>C
chr1	20817819	G	A	1895	264	0.257576	1	104,80,48,32	LOW	NONE	synonymous_variant	Mcm3	c.165C>T
chr1	20817855	A	G	10759	309	0.938511	0	0,0,159,150	LOW	NONE	synonymous_variant	Mcm3	c.129T>C
chr1	20934668	T	C	2168	62	0.951613	0	0,0,44,18	LOW	NONE	synonymous_variant	Paqr8	c.45T>C
chr1	20934969	A	G	4251	135	0.866667	0	0,0,64,71	MODERATE	NONE	missense_variant	Paqr8	c.346A>G
chr1	20934972	T	C	4639	134	0.947761	0	0,0,63,71	LOW	NONE	synonymous_variant	Paqr8	c.349T>C
chr1	20935019	C	G	4419	127	0.937008	0	0,0,60,67	LOW	NONE	synonymous_variant	Paqr8	c.396C>G
chr1	20935145	G	A	3458	100	0.96	0	0,0,61,39	LOW	NONE	synonymous_variant	Paqr8	c.522G>A
chr1	20935152	A	C	3342	99	0.919192	4	0,1,61,37	MODERATE	NONE	missense_variant	Paqr8	c.529A>C
chr1	20935157	C	T	3510	106	0.95283	0	0,0,67,39	LOW	NONE	synonymous_variant	Paqr8	c.534C>T
chr1	20935208	T	C	5745	172	0.930233	0	0,0,103,69	LOW	NONE	synonymous_variant	Paqr8	c.585T>C
chr1	20935373	T	C	11234	321	0.959502	0	0,0,185,135	LOW	NONE	synonymous_variant	Paqr8	c.750T>C
chr1	20935595	T	C	7293	212	0.943396	0	0,0,67,145	LOW	NONE	synonymous_variant	Paqr8	c.972T>C
chr1	20935638	A	T	3699	109	0.926606	0	0,0,28,81	MODERATE	NONE	missense_variant	Paqr8	c.1015A>T
chr1	20936222	GA	G	157	59	0.694915	0	13,6,29,12	MODIFIER	NONE	3_prime_UTR_variant	Paqr8	c.*537delA
chr1	20936229	G	A	408	58	0.862069	0	0,0,35,17	MODIFIER	NONE	3_prime_UTR_variant	Paqr8	c.*541G>A
chr1	20936264	T	C	3823	110	0.945455	0	0,0,73,37	MODIFIER	NONE	3_prime_UTR_variant	Paqr8	c.*576T>C
chr1	20936371	A	C	3455	98	0.989796	0	0,0,36,62	MODIFIER	NONE	3_prime_UTR_variant	Paqr8	c.*683A>C
chr1	20936540	G	A	2509	70	0.971429	0	0,0,32,38	MODIFIER	NONE	3_prime_UTR_variant	Paqr8	c.*852G>A
chr1	20936615	T	C	2600	72	0.972222	0	0,0,36,36	MODIFIER	NONE	3_prime_UTR_variant	Paqr8	c.*927T>C
chr1	20937215	C	A	2002	56	0.964286	0	0,0,28,28	MODIFIER	NONE	3_prime_UTR_variant	Paqr8	c.*1527C>A
chr1	20937447	GA	G	2299	101	0.881188	4	4,8,46,43	MODIFIER	NONE	3_prime_UTR_variant	Paqr8	c.*1768delA
chr1	20939248	A	G	4558	134	0.940298	0	0,0,61,73	MODIFIER	MODIFIER	NONE	NONE	downstream_gene_variant
chr1	20939259	A	ACT	4350	129	0.899225	0	6,7,58,58	MODIFIER	MODIFIER	NONE	NONE	downstream_gene_variant
chr1	20939285	T	C	4592	132	0.939394	0	1,0,65,65	MODIFIER	MODIFIER	NONE	NONE	downstream_gene_variant
chr1	20939399	C	G	3342	91	1	0	0,0,36,55	MODIFIER	MODIFIER	NONE	NONE	downstream_gene_variant
chr1	20951709	C	T	4413	134	0.902985	0	0,0,69,65	MODIFIER	NONE	5_prime_UTR_variant	Efhc1	c.-25C>T
chr1	20972948	T	G	989	105	0.32381	10	26,43,20,16	MODERATE	NONE	missense_variant	Efhc1	c.1090T>G
chr1	20978750	C	T	3442	97	0.979381	0	0,0,34,63	LOW	NONE	synonymous_variant	Efhc1	c.1386C>T
chr1	20978822	A	G	2298	64	0.984375	0	0,0,17,47	LOW	NONE	synonymous_variant	Efhc1	c.1458A>G
chr1	20990594	C	CTT	153	86	0.395349	20	24,21,28,6	MODIFIER	NONE	intron_variant	Efhc1	c.1876-23_1876-22insTT
chr1	20990594	C	T	430	86	0.848837	0	1,1,56,28	MODIFIER	NONE	intron_variant	Efhc1	c.1876-23C>T
chr1	21001554	C	A	4384	133	0.909774	0	0,0,80,53	MODIFIER	NONE	3_prime_UTR_variant	Tram2	c.*8G>T
chr1	21003798	G	A	3199	89	0.977528	0	0,0,53,36	MODIFIER	NONE	intron_variant	Tram2	c.875+40C>T
chr1	21004152	G	T	2154	60	0.966667	0	0,0,53,7	MODIFIER	NONE	intron_variant	Tram2	c.731+74C>A
chr1	21004210	C	T	4974	146	0.924658	0	0,0,92,54	MODIFIER	NONE	intron_variant	Tram2	c.731+16G>A
chr1	21005575	G	A	4328	120	0.991667	0	0,0,61,59	LOW	NONE	synonymous_variant	Tram2	c.618C>T
chr1	21005626	T	G	2646	79	0.949367	0	0,0,28,51	LOW	NONE	synonymous_variant	Tram2	c.567A>C
chr1	21006207	T	A	4867	140	0.95	0	0,1,65,74	LOW	NONE	synonymous_variant	Tram2	c.498A>T
chr1	21006782	C	A	4196	124	0.943548	0	0,0,100,24	MODIFIER	NONE	intron_variant	Tram2	c.470+71G>T
chr1	21012928	G	T	3487	102	0.941176	0	0,0,39,63	MODIFIER	NONE	intron_variant	Tram2	c.295-19C>A
chr1	21012933	G	A	3565	101	0.980198	0	0,0,37,64	MODIFIER	NONE	intron_variant	Tram2	c.295-24C>T
chr1	21013383	C	T	4468	126	0.97619	0	0,0,94,32	MODIFIER	NONE	intron_variant	Tram2	c.294+19G>A
chr1	21013540	TC	T	3161	104	0.855769	6	3,14,7,82	MODIFIER	NONE	intron_variant	Tram2	c.185-30delG
chr1	21293408	G	A	2441	71	0.943662	0	0,0,59,12	MODIFIER	NONE	intron_variant	Gm4956	n.457+72C>T
chr1	21293429	A	G	2590	70	0.985714	0	0,0,51,19	MODIFIER	NONE	intron_variant	Gm4956	n.457+51T>C
chr1	21293430	A	G	2586	70	0.985714	0	0,0,51,19	MODIFIER	NONE	intron_variant	Gm4956	n.457+50T>C
chr1	21293433	A	T	2166	75	0.84	0	0,0,52,23	MODIFIER	NONE	intron_variant	Gm4956	n.457+47T>A
chr1	21293439	C	T	3380	102	0.970588	0	0,0,72,30	MODIFIER	NONE	intron_variant	Gm4956	n.457+41G>A
chr1	21293545	A	T	5562	160	0.9625	0	0,0,81,79	MODIFIER	NONE	non_coding_transcript_exon_variant	Gm4956	n.392T>A
chr1	21293645	GT	G	3779	109	0.963303	4	3,3,28,77	MODIFIER	NONE	intron_variant	Gm4956	n.325-34delA
chr1	21293692	T	A	2013	60	0.933333	0	0,0,8,52	MODIFIER	NONE	intron_variant	Gm4956	n.325-80A>T
chr1	21294907	G	A	2206	59	1	0	0,0,37,22	MODIFIER	NONE	intron_variant	Gm4956	n.324+19C>T
chr1	21294911	AGG	A	412	59	0.745763	0	9,6,28,16	MODIFIER	NONE	intron_variant	Gm4956	n.324+13_324+14delCC
chr1	21294914	G	GTTTT	395	52	0.826923	6	2,4,27,16	MODIFIER	NONE	intron_variant	Gm4956	n.324+11_324+12insAAAA
chr1	21297954	A	T	3008	87	0.988506	0	0,0,75,12	MODIFIER	NONE	intron_variant	Gm4956	n.272+87T>A
chr1	21298007	G	C	6131	173	0.953757	0	0,0,115,57	MODIFIER	NONE	intron_variant	Gm4956	n.272+34C>G
chr1	21298013	C	A	6467	182	0.972527	0	0,0,118,64	MODIFIER	NONE	intron_variant	Gm4956	n.272+28G>T
chr1	21298029	C	T	6352	202	0.861386	0	0,0,113,88	MODIFIER	NONE	intron_variant	Gm4956	n.272+12G>A
chr1	21349957	G	A	3423	111	0.981982	0	0,0,99,12	MODIFIER	NONE	5_prime_UTR_variant	Khdc1a	c.-63G>A
chr1	21349965	A	C	4034	128	1	0	0,0,113,15	MODIFIER	NONE	5_prime_UTR_variant	Khdc1a	c.-55A>C
chr1	21350218	A	G	2822	88	0.954545	0	0,0,33,55	MODIFIER	NONE	intron_variant	Khdc1a	c.101-40A>G
chr1	21350263	C	G	1686	60	0.916667	0	0,0,23,37	MODERATE	NONE	missense_variant	Khdc1a	c.106C>G
chr1	21368740	A	T	2299	299	0.347826	0	68,125,37,69	MODERATE	NONE	missense_variant	Khdc1c	c.83A>T
chr1	21384837	C	T	2938	83	0.951807	0	0,0,35,48	LOW	NONE	synonymous_variant	Khdc1b	c.319C>T
chr1	21403161	A	ACTCTTAT	143	51	0.235294	1	8,31,3,9	MODIFIER	MODIFIER	MODIFIER	NONE	NONE
chr1	21424013	G	A	3829	112	0.928571	0	0,0,88,24	MODIFIER	MODIFIER	MODIFIER	NONE	NONE
chr1	21424019	C	T	4298	125	0.936	0	0,0,97,28	MODIFIER	MODIFIER	MODIFIER	NONE	NONE
chr1	21424035	T	C	5164	141	0.978723	0	0,0,105,36	MODIFIER	MODIFIER	MODIFIER	NONE	NONE
chr1	21424036	G	A	5165	145	0.958621	0	0,0,105,40	MODIFIER	MODIFIER	MODIFIER	NONE	NONE
chr1	21424221	A	T	1738	54	0.888889	0	0,0,4,50	MODIFIER	MODIFIER	MODIFIER	NONE	NONE
chr1	21469608	G	A	2186	61	1	0	0,0,6,55	MODIFIER	MODIFIER	MODIFIER	NONE	NONE
chr1	21487190	T	C	2507	76	0.907895	0	0,0,57,19	MODIFIER	MODIFIER	MODIFIER	NONE	NONE
chr1	21487310	A	G	2501	73	0.945205	0	0,0,18,55	LOW	LOW	LOW	NONE	NONE
chr1	21511894	C	CT	1727	66	0.909091	0	5,1,47,13	MODIFIER	MODIFIER	MODIFIER	NONE	NONE
chr1	21512133	T	C	3017	92	0.945652	0	0,0,43,49	MODIFIER	MODIFIER	MODIFIER	NONE	NONE
chr1	21512274	T	A	4148	118	0.957627	0	0,0,73,45	MODIFIER	MODIFIER	MODIFIER	NONE	NONE
chr1	21512544	A	G	11867	347	0.956772	0	0,0,100,247	MODIFIER	MODIFIER	MODIFIER	NONE	NONE
chr1	21512735	A	T	1987	56	0.982143	0	0,0,28,28	MODIFIER	MODIFIER	MODIFIER	NONE	NONE
chr1	21512896	T	C	3517	102	0.970588	0	0,0,41,61	MODIFIER	MODIFIER	MODIFIER	NONE	NONE
chr1	22297043	CT	C	76	63	0.095238	1	19,39,1,5	MODIFIER	MODIFIER	MODIFIER	NONE	NONE
chr1	22427392	G	A	954	95	0.347368	0	46,16,26,7	MODIFIER	MODIFIER	MODIFIER	NONE	NONE
chr1	23376088	G	A	89	108	0.064815	32	54,19,34,0	MODIFIER	NONE	intron_variant	Ogfrl1	c.483-34C>T
chr1	23378844	A	AAC	82	55	0.054545	2	19,35,0,3	MODIFIER	NONE	intron_variant	Ogfrl1	c.325-41_325-40insGT
chr1	23479525	G	A	1082	133	0.300752	0	65,24,32,12	MODIFIER	NONE	intergenic_region	Ogfrl1-B3gat2	n.23479525G>A
chr1	23763109	G	A	107	91	0.054945	0	58,28,3,2	MODERATE	NONE	missense_variant	B3gat2	c.475G>A
chr1	23763276	A	G	96	66	0.075758	5	9,38,1,18	MODIFIER	NONE	intron_variant	B3gat2	c.594+48A>G
chr1	23845071	A	G	4151	120	0.958333	0	0,0,71,49	MODIFIER	MODIFIER	MODIFIER	MODIFIER	NONE
chr1	23845157	T	C	5100	147	0.952381	0	0,0,55,92	LOW	MODIFIER	MODIFIER	MODIFIER	NONE
chr1	23846453	C	A	3744	111	0.90991	0	0,0,50,61	LOW	LOW	MODIFIER	MODIFIER	NONE
chr1	23846558	A	G	3927	110	0.972727	0	0,1,52,57	LOW	LOW	MODIFIER	MODIFIER	NONE
chr1	23846568	G	A	3482	100	0.97	0	0,0,44,56	LOW	LOW	LOW	MODIFIER	NONE
chr1	23846638	C	G	1972	54	0.981481	0	0,0,8,46	MODIFIER	MODIFIER	MODIFIER	MODIFIER	NONE
chr1	23849252	C	T	2084	59	0.983051	0	0,0,46,13	MODIFIER	MODIFIER	MODIFIER	MODIFIER	NONE
chr1	23849258	A	G	2199	65	0.923077	0	0,0,47,18	MODIFIER	MODIFIER	MODIFIER	MODIFIER	NONE
chr1	23853450	T	C	4021	114	0.95614	0	0,0,58,55	LOW	LOW	MODIFIER	NONE	NONE
chr1	23853591	G	A	2388	65	0.984615	0	0,0,15,50	MODIFIER	MODIFIER	MODIFIER	NONE	NONE
chr1	23859156	A	G	2633	79	0.924051	0	0,0,6,73	MODIFIER	MODIFIER	MODIFIER	NONE	NONE
chr1	23996242	G	C	4881	138	0.963768	0	0,0,84,54	MODIFIER	NONE	3_prime_UTR_variant	Sdhaf4	c.*9C>G
chr1	24003140	T	C	1828	52	0.942308	0	0,0,39,13	MODIFIER	NONE	intron_variant	Sdhaf4	c.205+17A>G
chr1	24003167	C	G	2774	79	0.987342	0	0,0,52,27	MODERATE	NONE	missense_variant	Sdhaf4	c.195G>C
chr1	24003179	G	A	2696	76	0.960526	0	0,0,46,29	LOW	NONE	synonymous_variant	Sdhaf4	c.183C>T
chr1	24003325	C	CA	2226	63	0.920635	1	2,4,15,43	MODIFIER	NONE	intron_variant	Sdhaf4	c.56-20_56-19insT
chr1	24057231	C	T	5416	151	0.97351	0	0,0,77,74	MODERATE	NONE	missense_variant	Fam135a	c.341G>A
chr1	24057236	C	T	5191	145	0.958621	0	0,0,74,71	LOW	NONE	synonymous_variant	Fam135a	c.336G>A
chr1	24072065	C	CA	2147	56	0.982143	0	1,0,30,25	MODIFIER	NONE	intron_variant	Fam135a	c.78-4088_78-4087insT
chr1	24072208	A	G	2718	79	0.949367	0	0,0,50,29	MODIFIER	NONE	intron_variant	Fam135a	c.78-4230T>C
chr1	24072313	A	T	2596	81	0.975309	0	0,0,32,49	MODIFIER	NONE	intron_variant	Fam135a	c.78-4335T>A
chr1	24072401	C	T	2732	83	0.951807	0	0,0,42,41	MODIFIER	NONE	intron_variant	Fam135a	c.78-4423G>A
chr1	24177894	C	T	1719	56	0.839286	0	0,0,21,35	MODIFIER	NONE	intron_variant	Col9a1	c.14+26C>T
chr1	24178328	T	C	4398	125	0.976	0	0,0,57,68	LOW	NONE	synonymous_variant	Col9a1	c.84T>C
chr1	24178385	C	T	2001	58	0.965517	0	0,0,11,47	MODIFIER	NONE	intron_variant	Col9a1	c.88+53C>T
chr1	24179645	T	C	1860	58	0.87931	0	0,0,16,42	MODIFIER	NONE	intron_variant	Col9a1	c.299+38T>C
chr1	24194621	GCAA	G	71	155	0.019355	0	129,24,3,0	MODIFIER	MODIFIER	NONE	NONE	upstream_gene_variant
chr1	24194818	T	G	3244	96	0.916667	0	0,0,4,92	MODIFIER	MODIFIER	NONE	NONE	upstream_gene_variant
chr1	24194862	C	T	1917	56	0.946429	0	0,0,1,55	MODIFIER	MODIFIER	NONE	NONE	upstream_gene_variant
chr1	24195402	G	A	7815	235	0.906383	0	0,0,135,100	MODERATE	MODIFIER	NONE	NONE	missense_variant
chr1	24195531	T	C	5192	153	0.915033	0	0,0,53,100	LOW	MODIFIER	NONE	NONE	synonymous_variant
chr1	24217483	C	T	1821	52	0.961538	0	0,0,42,10	MODIFIER	MODIFIER	NONE	NONE	intron_variant
chr1	24220752	G	A	2622	80	0.8875	0	0,0,38,42	LOW	LOW	NONE	NONE	synonymous_variant
chr1	24221568	C	T	2512	68	1	0	0,0,39,29	MODIFIER	MODIFIER	NONE	NONE	intron_variant
chr1	24221621	G	A	2390	65	1	0	0,0,31,34	MODERATE	MODERATE	NONE	NONE	missense_variant
chr1	24221759	T	C	2354	67	0.985075	0	0,0,38,29	MODIFIER	MODIFIER	NONE	NONE	intron_variant
chr1	24230288	A	T	2930	87	0.908046	0	0,0,15,72	MODIFIER	MODIFIER	NONE	NONE	intron_variant
chr1	24231448	T	C	4152	120	0.95	0	0,0,68,52	LOW	LOW	NONE	NONE	splice_region_variant&intron_variant
chr1	24231459	T	C	4614	131	0.969466	0	0,0,72,59	LOW	LOW	NONE	NONE	synonymous_variant
chr1	24231528	A	C	4012	110	0.981818	0	0,0,41,69	MODIFIER	MODIFIER	NONE	NONE	intron_variant
chr1	24232052	T	C	1810	51	0.980392	0	0,0,50,1	MODIFIER	MODIFIER	NONE	NONE	intron_variant
chr1	24232077	C	T	3195	90	0.966667	0	0,0,78,12	MODIFIER	MODIFIER	NONE	NONE	intron_variant
chr1	24232142	T	C	7380	208	0.956731	0	0,0,133,75	MODIFIER	MODIFIER	NONE	NONE	intron_variant
chr1	24232237	A	ATT	562	164	0.390244	8	30,71,12,52	MODIFIER	MODIFIER	NONE	NONE	intron_variant
chr1	24232243	A	T	527	131	0.877863	3	1,2,20,108	MODIFIER	MODIFIER	NONE	NONE	intron_variant
chr1	24237232	T	A	3856	109	0.954128	0	0,0,62,47	MODERATE	MODERATE	NONE	NONE	missense_variant
chr1	24251886	G	A	3584	102	0.960784	0	0,1,33,68	MODIFIER	MODIFIER	NONE	NONE	3_prime_UTR_variant
chr1	24270427	T	C	3067	89	0.955056	0	0,0,34,55	LOW	NONE	synonymous_variant	Col19a1	c.3144A>G
chr1	24270504	C	G	2121	67	0.850746	0	0,0,20,47	MODIFIER	NONE	intron_variant	Col19a1	c.3077-10G>C
chr1	24285077	G	A	3316	92	0.967391	0	0,0,37,55	LOW	NONE	synonymous_variant	Col19a1	c.2814C>T
chr1	24293079	C	G	1824	213	0.300469	2	71,77,28,37	MODERATE	NONE	missense_variant	Col19a1	c.2642G>C
chr1	24296730	A	G	298	54	0.203704	1	31,11,8,4	MODIFIER	NONE	intron_variant	Col19a1	c.2604+30T>C
chr1	24307604	T	C	2181	60	0.983333	0	0,0,39,21	MODIFIER	NONE	intron_variant	Col19a1	c.2328+42A>G
chr1	24312463	A	C	3986	111	0.972973	0	0,0,58,53	MODERATE	NONE	missense_variant	Col19a1	c.2151T>G
chr1	24315410	T	G	4191	124	0.91129	0	0,0,65,58	LOW	NONE	synonymous_variant	Col19a1	c.2049A>C
chr1	24322187	C	T	1718	55	0.854545	0	0,0,28,27	MODIFIER	NONE	intron_variant	Col19a1	c.1797+27G>A
chr1	24322208	G	A	1729	60	0.8	0	0,0,33,27	LOW	NONE	splice_region_variant&intron_variant	Col19a1	c.1797+6C>T
chr1	24322266	GA	G	394	51	0.45098	21	15,9,5,18	MODIFIER	NONE	intron_variant	Col19a1	c.1753-9delT
chr1	24322984	C	T	3153	88	0.977273	0	0,0,43,45	LOW	NONE	synonymous_variant	Col19a1	c.1707G>A
chr1	24323046	C	T	1762	54	0.888889	0	0,0,12,42	MODIFIER	NONE	intron_variant	Col19a1	c.1663-18G>A
chr1	24323650	A	C	6532	176	0.988636	0	0,0,125,51	MODIFIER	NONE	intron_variant	Col19a1	c.1662+32T>G
chr1	24323651	A	T	6355	177	0.960452	0	0,0,125,51	MODIFIER	NONE	intron_variant	Col19a1	c.1662+31T>A
chr1	24323685	T	C	9519	265	0.969811	0	0,0,146,119	LOW	NONE	synonymous_variant	Col19a1	c.1659A>G
chr1	24326110	GA	G	2621	107	0.925234	15	1,5,64,35	MODIFIER	NONE	intron_variant	Col19a1	c.1500+20delT
chr1	24326175	A	G	5474	153	0.96732	0	0,0,70,83	MODIFIER	NONE	intron_variant	Col19a1	c.1465-9T>C
chr1	24326226	G	A	3748	103	1	0	0,0,21,82	MODIFIER	NONE	intron_variant	Col19a1	c.1465-60C>T
chr1	24337862	A	T	2930	144	0.979167	0	0,0,102,40	MODIFIER	NONE	intron_variant	Col19a1	c.1365+36T>A
chr1	24337865	A	T	2791	155	0.890323	0	1,0,104,47	MODIFIER	NONE	intron_variant	Col19a1	c.1365+33T>A
chr1	24352380	T	C	2059	62	0.951613	0	0,0,11,51	MODIFIER	NONE	intron_variant	Col19a1	c.1270-45A>G
chr1	24374645	C	CA	193	51	0.254902	4	6,33,0,13	MODIFIER	NONE	intron_variant	Col19a1	c.1216-10_1216-9insT
chr1	24508202	C	T	4036	113	0.964602	0	0,0,61,52	LOW	NONE	synonymous_variant	Col19a1	c.999G>A
chr1	24510872	C	T	1862	52	0.961538	0	0,0,18,34	MODERATE	NONE	missense_variant	Col19a1	c.943G>A
chr1	24711649	T	G	2288	68	0.955882	0	0,0,8,60	MODIFIER	MODIFIER	NONE	NONE	intron_variant
chr1	24714834	G	C	2847	81	0.950617	0	0,0,60,20	MODIFIER	MODIFIER	NONE	NONE	intron_variant
chr1	24728683	CT	C	1989	61	0.983607	0	0,1,22,38	MODIFIER	MODIFIER	NONE	NONE	intron_variant
chr1	24728698	G	A	2178	61	0.967213	0	0,0,19,42	MODIFIER	MODIFIER	NONE	NONE	intron_variant
chr1	24731927	G	T	1827	54	0.925926	0	0,0,15,39	MODIFIER	MODIFIER	NONE	NONE	intron_variant
chr1	24743964	T	C	2813	80	0.95	0	0,0,25,54	MODIFIER	MODIFIER	NONE	NONE	intron_variant
chr1	24744268	T	C	2389	70	0.942857	0	0,0,40,30	LOW	LOW	NONE	NONE	synonymous_variant
chr1	24744280	A	G	2556	74	0.945946	0	0,0,39,35	LOW	LOW	NONE	NONE	synonymous_variant
chr1	24746762	C	A	2575	71	0.985915	0	0,0,50,21	MODIFIER	MODIFIER	NONE	NONE	intron_variant
chr1	24746798	T	C	3111	87	0.977012	0	0,0,58,29	LOW	LOW	NONE	NONE	splice_region_variant&intron_variant
chr1	24746867	C	T	2636	73	0.986301	0	0,0,27,46	LOW	LOW	NONE	NONE	synonymous_variant
chr1	24762120	A	G	2023	98	0.969388	0	1,0,96,1	MODIFIER	MODIFIER	NONE	NONE	intron_variant
chr1	24762124	CA	C	106	100	0.05	22	94,1,3,2	MODIFIER	MODIFIER	NONE	NONE	intron_variant
chr1	24762125	A	ATAAC	1760	101	0.831683	10	16,2,83,1	MODIFIER	MODIFIER	NONE	NONE	intron_variant
chr1	24762382	G	A	1849	57	0.912281	0	0,0,2,55	MODIFIER	MODIFIER	NONE	NONE	intron_variant
chr1	25012522	T	C	8943	254	0.964567	0	0,0,152,102	MODIFIER	NONE	intergenic_region	Lmbrd1-Adgrb3	n.25012522T>C
chr1	25012601	A	G	290	198	0.075758	14	71,111,11,5	MODIFIER	NONE	intergenic_region	Lmbrd1-Adgrb3	n.25012601A>G
chr1	25117214	A	C	433	57	0.280702	0	35,5,15,2	MODIFIER	NONE	intron_variant	Adgrb3	c.3188+75T>G
chr1	25223840	TC	T	3198	91	0.978022	0	1,1,37,52	MODIFIER	NONE	intron_variant	Adgrb3	c.2712-1979delG
chr1	25223877	T	C	3198	97	0.917526	0	0,0,58,39	MODIFIER	NONE	intron_variant	Adgrb3	c.2712-2015A>G
chr1	25223963	C	A	6081	170	0.970588	0	0,0,116,54	MODIFIER	NONE	intron_variant	Adgrb3	c.2712-2101G>T
chr1	25223964	A	G	6100	169	0.970414	0	0,0,116,53	MODIFIER	NONE	intron_variant	Adgrb3	c.2712-2102T>C
chr1	25224115	G	C	6898	196	0.959184	0	0,0,104,92	MODIFIER	NONE	intron_variant	Adgrb3	c.2712-2253C>G
chr1	25224133	A	G	7193	208	0.9375	0	0,0,112,96	MODIFIER	NONE	intron_variant	Adgrb3	c.2712-2271T>C
chr1	25224173	C	T	7657	220	0.940909	0	0,0,128,92	MODIFIER	NONE	intron_variant	Adgrb3	c.2712-2311G>A
chr1	25224207	C	T	9237	271	0.933579	0	0,0,147,123	MODIFIER	NONE	intron_variant	Adgrb3	c.2712-2345G>A
chr1	25224347	A	G	7816	238	0.941176	0	0,0,95,143	MODIFIER	NONE	intron_variant	Adgrb3	c.2711+2373T>C
chr1	25224363	G	A	6378	203	0.940887	0	0,0,74,129	MODIFIER	NONE	intron_variant	Adgrb3	c.2711+2357C>T
chr1	25224365	G	T	6417	199	0.954774	0	0,0,72,127	MODIFIER	NONE	intron_variant	Adgrb3	c.2711+2355C>A
chr1	25224384	T	C	3750	131	0.89313	0	0,0,33,97	MODIFIER	NONE	intron_variant	Adgrb3	c.2711+2336A>G
chr1	25224386	G	A	3927	121	0.958678	0	0,0,25,96	MODIFIER	NONE	intron_variant	Adgrb3	c.2711+2334C>T
chr1	25224390	A	C	3865	119	0.957983	0	0,0,24,95	MODIFIER	NONE	intron_variant	Adgrb3	c.2711+2330T>G
chr1	25224392	T	C	3850	119	0.957983	0	0,0,24,95	MODIFIER	NONE	intron_variant	Adgrb3	c.2711+2328A>G
chr1	25224423	G	A	3233	98	0.979592	0	0,0,11,87	MODIFIER	NONE	intron_variant	Adgrb3	c.2711+2297C>T
chr1	25226690	T	C	3587	102	0.980392	0	0,0,71,31	MODIFIER	NONE	intron_variant	Adgrb3	c.2711+30A>G
chr1	25396501	A	C	1872	54	0.981481	0	0,0,19,35	MODIFIER	NONE	intron_variant	Adgrb3	c.2437-22T>G
chr1	25487308	C	T	3751	114	0.921053	0	0,0,69,45	MODIFIER	NONE	intron_variant	Adgrb3	c.1929+617G>A
chr1	25487367	T	C	3524	103	0.951456	0	0,0,40,63	MODIFIER	NONE	intron_variant	Adgrb3	c.1929+558A>G
chr1	25487368	C	T	3657	102	0.980392	0	0,0,39,63	MODIFIER	NONE	intron_variant	Adgrb3	c.1929+557G>A
chr1	25487373	G	T	3638	105	0.952381	0	0,0,40,65	MODIFIER	NONE	intron_variant	Adgrb3	c.1929+552C>A
chr1	25487429	A	G	2217	62	0.983871	0	0,0,12,50	MODIFIER	NONE	intron_variant	Adgrb3	c.1929+496T>C
chr1	25487852	T	TG	2348	63	0.952381	0	1,2,25,35	MODIFIER	NONE	intron_variant	Adgrb3	c.1929+72_1929+73insC
chr1	25487901	C	T	2947	79	1	0	0,0,26,53	MODIFIER	NONE	intron_variant	Adgrb3	c.1929+24G>A
chr1	25487902	T	C	2843	79	0.962025	0	0,0,26,53	MODIFIER	NONE	intron_variant	Adgrb3	c.1929+23A>G
chr1	25487931	C	A	2392	72	0.944444	0	0,0,25,47	LOW	NONE	synonymous_variant	Adgrb3	c.1923G>T
chr1	25830610	T	C	1561	51	0.882353	5	0,1,38,12	MODIFIER	MODIFIER	NONE	NONE	upstream_gene_variant
chr1	25830657	A	G	2559	73	0.945205	0	0,0,38,34	MODIFIER	MODIFIER	NONE	NONE	upstream_gene_variant
chr1	26681923	A	T	2596	73	0.958904	0	0,0,51,22	MODIFIER	NONE	3_prime_UTR_variant	4931408C20Rik	c.*29T>A
chr1	26682055	C	G	3020	86	0.976744	0	0,0,42,44	MODERATE	NONE	missense_variant	4931408C20Rik	c.4043G>C
chr1	26682068	T	C	2982	88	0.954545	0	0,0,49,39	MODERATE	NONE	missense_variant	4931408C20Rik	c.4030A>G
chr1	26682184	C	T	6401	177	0.971751	0	0,0,100,77	MODERATE	NONE	missense_variant	4931408C20Rik	c.3914G>A
chr1	26682262	C	T	5588	161	0.956522	0	0,0,84,77	MODERATE	NONE	missense_variant	4931408C20Rik	c.3836G>A
chr1	26682301	G	T	5946	172	0.947674	0	0,0,92,80	MODERATE	NONE	missense_variant	4931408C20Rik	c.3797C>A
chr1	26682832	A	G	3394	98	0.969388	0	0,0,44,54	MODERATE	NONE	missense_variant	4931408C20Rik	c.3266T>C
chr1	26682847	T	C	3241	92	0.956522	0	0,0,40,52	MODERATE	NONE	missense_variant	4931408C20Rik	c.3251A>G
chr1	26682898	TCAA	T	3053	89	0.876405	0	8,7,42,36	MODERATE	NONE	disruptive_inframe_deletion	4931408C20Rik	c.3197_3199delTTG
chr1	26682910	T	C	3177	97	0.886598	0	0,0,55,42	MODERATE	NONE	missense_variant	4931408C20Rik	c.3188A>G
chr1	26683020	C	G	5330	152	0.953947	0	0,0,80,70	LOW	NONE	synonymous_variant	4931408C20Rik	c.3078G>C
chr1	26683023	T	C	5544	155	0.967742	0	0,0,80,75	LOW	NONE	synonymous_variant	4931408C20Rik	c.3075A>G
chr1	26683129	T	A	3621	106	0.943396	0	0,0,41,65	MODERATE	NONE	missense_variant	4931408C20Rik	c.2969A>T
chr1	26683323	A	G	2044	59	0.949153	0	0,0,27,32	LOW	NONE	synonymous_variant	4931408C20Rik	c.2775T>C
chr1	26683337	C	G	2078	59	0.949153	0	0,0,26,33	MODERATE	NONE	missense_variant	4931408C20Rik	c.2761G>C
chr1	26683542	C	A	3494	102	0.941176	0	0,0,43,58	MODERATE	NONE	missense_variant	4931408C20Rik	c.2556G>T
chr1	26683588	A	C	2725	76	0.973684	0	0,0,31,45	MODERATE	NONE	missense_variant	4931408C20Rik	c.2510T>G
chr1	26683596	C	T	2742	75	0.986667	0	0,0,28,47	LOW	NONE	synonymous_variant	4931408C20Rik	c.2502G>A
chr1	26683658	G	T	2547	72	0.958333	0	0,0,42,30	MODERATE	NONE	missense_variant	4931408C20Rik	c.2440C>A
chr1	26683736	T	C	3205	89	0.966292	0	0,0,52,37	MODERATE	NONE	missense_variant	4931408C20Rik	c.2362A>G
chr1	26683737	C	T	3265	91	0.978022	0	0,0,54,37	LOW	NONE	synonymous_variant	4931408C20Rik	c.2361G>A
chr1	26683914	C	T	5490	154	0.961039	0	0,0,74,80	LOW	NONE	synonymous_variant	4931408C20Rik	c.2184G>A
chr1	26684200	A	G	2193	61	0.967213	0	0,0,35,26	MODERATE	NONE	missense_variant	4931408C20Rik	c.1898T>C
chr1	26684338	C	G	3809	110	0.954545	0	0,0,63,47	MODERATE	NONE	missense_variant	4931408C20Rik	c.1760G>C
chr1	26684371	C	G	4227	128	0.90625	0	0,0,74,54	MODERATE	NONE	missense_variant	4931408C20Rik	c.1727G>C
chr1	26684491	T	C	5460	156	0.948718	0	0,0,68,88	MODERATE	NONE	missense_variant	4931408C20Rik	c.1607A>G
chr1	26684661	G	A	2338	67	0.955224	0	0,0,28,39	LOW	NONE	synonymous_variant	4931408C20Rik	c.1437C>T
chr1	26684863	G	T	3569	104	0.942308	0	0,0,57,46	MODERATE	NONE	missense_variant	4931408C20Rik	c.1235C>A
chr1	26684941	G	A	3720	106	0.943396	0	0,0,51,55	MODERATE	NONE	missense_variant	4931408C20Rik	c.1157C>T
chr1	26684989	C	G	3858	107	0.990654	0	0,0,62,45	MODERATE	NONE	missense_variant	4931408C20Rik	c.1109G>C
chr1	26685033	A	G	5226	144	0.986111	0	0,0,84,60	LOW	NONE	synonymous_variant	4931408C20Rik	c.1065T>C
chr1	26685307	G	T	2860	83	0.975904	0	0,0,36,45	MODERATE	NONE	missense_variant	4931408C20Rik	c.791C>A
chr1	26685916	C	A	1873	57	0.912281	0	0,0,25,32	LOW	NONE	splice_region_variant&intron_variant	4931408C20Rik	c.187-5G>T
chr1	26687120	G	A	174	57	0.122807	0	47,2,7,0	MODIFIER	NONE	intron_variant	4931408C20Rik	c.186+121C>T
chr1	26687124	T	A	346	60	0.216667	3	43,1,15,1	MODIFIER	NONE	intron_variant	4931408C20Rik	c.186+117A>T
chr1	26687144	T	TAA	1489	83	0.614458	4	29,1,51,0	MODIFIER	NONE	intron_variant	4931408C20Rik	c.186+96_186+97insTT
chr1	26687144	T	TA	72	83	0.048193	0	29,1,4,0	MODIFIER	NONE	intron_variant	4931408C20Rik	c.186+96_186+97insT
chr1	26687144	TA	T	140	83	0.084337	0	77,1,7,0	MODIFIER	NONE	intron_variant	4931408C20Rik	c.186+96delT
chr1	26687168	G	A	176	122	0.065574	3	107,6,8,1	MODIFIER	NONE	intron_variant	4931408C20Rik	c.186+73C>T
chr1	26687171	C	T	4529	130	0.961538	0	0,0,122,8	MODIFIER	NONE	intron_variant	4931408C20Rik	c.186+70G>A
chr1	26687178	G	A	429	155	0.116129	11	126,9,16,4	MODIFIER	NONE	intron_variant	4931408C20Rik	c.186+63C>T
chr1	26687195	T	A	366	190	0.084211	5	150,24,12,4	MODIFIER	NONE	intron_variant	4931408C20Rik	c.186+46A>T
chr1	26687205	A	G	793	219	0.146119	2	154,32,25,7	MODIFIER	NONE	intron_variant	4931408C20Rik	c.186+36T>C
chr1	26687267	G	A	895	405	0.098765	0	232,132,27,14	MODERATE	NONE	missense_variant	4931408C20Rik	c.160C>T
chr1	26687325	A	T	1214	515	0.100971	3	241,216,34,23	LOW	NONE	synonymous_variant	4931408C20Rik	c.102T>A
chr1	26687504	G	T	218	155	0.064516	3	8,137,1,9	MODIFIER	MODIFIER	NONE	NONE	upstream_gene_variant
chr1	26687529	T	A	376	102	0.147059	0	3,84,0,15	MODIFIER	MODIFIER	NONE	NONE	upstream_gene_variant
chr1	26687544	A	T	280	68	0.161765	5	1,56,1,10	MODIFIER	MODIFIER	NONE	NONE	upstream_gene_variant
chr1	27073439	T	C	1823	50	0.98	0	0,0,39,11	MODIFIER	NONE	intergenic_region	4931408C20Rik-Gm597	n.27073439T>C
chr1	27073577	G	A	128	69	0.115942	0	32,29,4,4	MODIFIER	NONE	intergenic_region	4931408C20Rik-Gm597	n.27073577G>A
chr1	27073635	C	T	592	89	0.337079	16	42,16,29,2	MODIFIER	NONE	intergenic_region	4931408C20Rik-Gm597	n.27073635C>T
chr1	27073656	G	T	1016	125	0.376	0	55,23,32,15	MODIFIER	NONE	intergenic_region	4931408C20Rik-Gm597	n.27073656G>T
chr1	27073737	G	A	937	127	0.338583	13	32,51,9,35	MODIFIER	NONE	intergenic_region	4931408C20Rik-Gm597	n.27073737G>A
chr1	27073767	G	A	134	64	0.171875	15	18,35,0,11	MODIFIER	NONE	intergenic_region	4931408C20Rik-Gm597	n.27073767G>A
chr1	27073770	A	G	1459	58	0.965517	0	0,1,19,38	MODIFIER	NONE	intergenic_region	4931408C20Rik-Gm597	n.27073770A>G
chr1	27993179	A	G	2800	81	0.938272	0	0,0,49,32	MODIFIER	NONE	intergenic_region	4931408C20Rik-Gm597	n.27993179A>G
chr1	27994759	T	C	3137	90	0.955556	0	0,0,18,72	MODIFIER	NONE	intergenic_region	4931408C20Rik-Gm597	n.27994759T>C
chr1	27995016	A	C	2013	60	0.95	0	0,0,41,19	MODIFIER	NONE	intergenic_region	4931408C20Rik-Gm597	n.27995016A>C
chr1	28776317	C	T	4118	121	0.966942	0	0,0,65,56	MODERATE	NONE	missense_variant	Gm597	c.2633G>A
chr1	28776592	A	T	4127	112	0.982143	0	0,0,51,61	LOW	NONE	synonymous_variant	Gm597	c.2358T>A
chr1	28776782	G	C	5279	156	0.935897	0	0,0,78,78	MODERATE	NONE	missense_variant	Gm597	c.2168C>G
chr1	28777184	A	G	3729	108	0.944444	0	0,0,60,48	MODERATE	NONE	missense_variant	Gm597	c.1766T>C
chr1	28777286	C	G	3590	103	0.961165	0	0,0,45,58	MODERATE	NONE	missense_variant	Gm597	c.1664G>C
chr1	28777292	C	T	3419	100	0.95	0	0,0,43,56	MODERATE	NONE	missense_variant	Gm597	c.1658G>A
chr1	28778246	C	T	3653	103	0.961165	0	0,0,43,60	MODERATE	NONE	missense_variant	Gm597	c.704G>A
chr1	28800481	G	T	2362	69	0.942029	0	0,0,22,47	MODIFIER	NONE	intergenic_region	Gm597-Mir6342	n.28800481G>T
chr1	28802522	C	CTCT	2137	73	0.753425	14	6,13,33,22	MODIFIER	NONE	intergenic_region	Gm597-Mir6342	n.28802522_28802523insTCT
chr1	28802659	A	C	3662	108	0.935185	0	0,0,47,61	MODIFIER	NONE	intergenic_region	Gm597-Mir6342	n.28802659A>C
chr1	28938123	T	C	2581	74	0.986486	0	1,0,46,27	MODIFIER	NONE	intergenic_region	Gm597-Mir6342	n.28938123T>C
chr1	28938179	C	T	3761	108	0.944444	0	0,0,68,40	MODIFIER	NONE	intergenic_region	Gm597-Mir6342	n.28938179C>T
chr1	28938323	A	G	3428	94	0.989362	0	0,0,43,51	MODIFIER	NONE	intergenic_region	Gm597-Mir6342	n.28938323A>G
chr1	28938348	G	T	2882	81	1	0	0,0,32,49	MODIFIER	NONE	intergenic_region	Gm597-Mir6342	n.28938348G>T
chr1	28938359	A	G	2710	77	0.961039	0	0,0,26,51	MODIFIER	NONE	intergenic_region	Gm597-Mir6342	n.28938359A>G
chr1	28938401	T	C	2371	68	0.970588	0	0,0,22,46	MODIFIER	NONE	intergenic_region	Gm597-Mir6342	n.28938401T>C
chr1	28938413	A	C	441	63	0.253968	7	15,32,2,14	MODIFIER	NONE	intergenic_region	Gm597-Mir6342	n.28938413A>C
chr1	29219819	T	A	3695	102	0.970588	0	0,0,59,43	MODIFIER	NONE	intergenic_region	Gm597-Mir6342	n.29219819T>A
chr1	29930353	A	C	1173	130	0.315385	1	44,44,23,19	MODIFIER	NONE	intergenic_region	Mir6342-Phf3	n.29930353A>C
chr1	29985974	G	C	99	92	0.054348	10	52,34,6,0	MODIFIER	NONE	intergenic_region	Mir6342-Phf3	n.29985974G>C
chr1	29986132	A	T	86	60	0.066667	2	15,41,0,4	MODIFIER	NONE	intergenic_region	Mir6342-Phf3	n.29986132A>T
chr1	30770290	G	C	1755	206	0.300971	11	66,77,38,25	MODIFIER	NONE	intergenic_region	Mir6342-Phf3	n.30770290G>C
chr1	30770293	T	C	7191	206	0.961165	0	0,0,107,99	MODIFIER	NONE	intergenic_region	Mir6342-Phf3	n.30770293T>C
chr1	30943919	C	T	14753	411	0.965937	0	0,0,249,162	MODIFIER	MODIFIER	NONE	NONE	intron_variant
chr1	30944871	T	C	3198	89	0.977528	0	0,0,81,8	MODIFIER	MODIFIER	NONE	NONE	intron_variant
chr1	30944901	GTGTA	G	4924	126	0.968254	0	4,0,103,19	MODIFIER	MODIFIER	NONE	NONE	intron_variant
chr1	30944905	A	AG	124	130	0.038462	6	108,21,3,2	MODIFIER	MODIFIER	NONE	NONE	intron_variant
chr1	31141625	TG	T	2653	77	1	0	0,0,75,2	MODIFIER	NONE	non_coding_transcript_exon_variant	4931428L18Rik	n.546delC
chr1	31141644	A	G	3393	99	0.939394	6	2,1,88,7	MODIFIER	NONE	non_coding_transcript_exon_variant	4931428L18Rik	n.528T>C
chr1	31141646	G	A	3549	103	0.941748	0	0,0,92,8	MODIFIER	NONE	non_coding_transcript_exon_variant	4931428L18Rik	n.526C>T
chr1	31141716	T	C	8906	258	0.949612	3	0,1,148,109	MODIFIER	NONE	non_coding_transcript_exon_variant	4931428L18Rik	n.456A>G
chr1	31141795	G	C	6822	194	0.948454	0	0,0,55,139	MODIFIER	NONE	intron_variant	4931428L18Rik	n.404-27C>G
chr1	31176384	T	C	3831	110	0.963636	0	0,0,81,29	MODIFIER	MODIFIER	NONE	NONE	upstream_gene_variant
chr1	31223764	C	T	4093	119	0.966387	0	0,0,43,75	MODIFIER	MODIFIER	NONE	NONE	3_prime_UTR_variant
chr1	31224022	C	CAT	3580	102	0.921569	8	6,2,44,50	MODIFIER	MODIFIER	NONE	NONE	3_prime_UTR_variant
chr1	32172894	C	G	2631	330	0.30303	0	146,77,71,35	MODIFIER	NONE	5_prime_UTR_variant	Khdrbs2	c.-24C>G
chr1	32311018	A	C	2054	55	1	0	0,0,37,18	MODIFIER	NONE	intron_variant	Khdrbs2	c.220-22448A>C
chr1	32311184	C	T	2302	66	0.969697	0	0,0,16,50	MODIFIER	NONE	intron_variant	Khdrbs2	c.220-22282C>T
chr1	32467893	T	C	2198	61	0.983607	0	0,0,29,32	LOW	NONE	splice_region_variant&intron_variant	Khdrbs2	c.611+6T>C
chr1	32517289	GA	G	1618	60	0.85	20	7,2,15,36	MODIFIER	MODIFIER	NONE	NONE	downstream_gene_variant
chr1	32519656	G	T	13670	446	0.943946	24	11,0,249,186	LOW	MODIFIER	NONE	NONE	synonymous_variant
chr1	32519872	T	C	285	292	0.054795	19	118,157,2,15	LOW	MODIFIER	NONE	NONE	synonymous_variant
chr1	32520292	T	A	2701	92	0.98913	0	0,0,1,91	LOW	MODIFIER	NONE	NONE	synonymous_variant
chr1	32545670	G	C	5278	167	0.988024	0	0,0,55,112	MODERATE	MODIFIER	NONE	NONE	missense_variant
chr1	32644168	T	A	2126	61	0.95082	0	0,0,15,46	MODIFIER	NONE	intron_variant	Khdrbs2	c.952+17T>A
chr1	32657520	G	A	2825	79	0.974684	0	0,0,24,55	LOW	NONE	synonymous_variant	Khdrbs2	c.1029G>A
chr1	33101034	T	A	4263	129	0.953488	0	0,0,82,47	MODIFIER	NONE	intergenic_region	Khdrbs2-Prim2	n.33101034T>A
chr1	33101057	C	G	4964	145	0.972414	0	0,0,84,61	MODIFIER	NONE	intergenic_region	Khdrbs2-Prim2	n.33101057C>G
chr1	33101134	A	G	4082	119	0.97479	0	0,0,41,78	MODIFIER	NONE	intergenic_region	Khdrbs2-Prim2	n.33101134A>G
chr1	33101149	G	C	3186	94	0.957447	0	0,0,29,65	MODIFIER	NONE	intergenic_region	Khdrbs2-Prim2	n.33101149G>C
chr1	33101558	G	C	1800	50	1	0	0,0,24,26	MODIFIER	NONE	intergenic_region	Khdrbs2-Prim2	n.33101558G>C
chr1	33101582	C	G	1918	54	0.981481	0	0,0,18,36	MODIFIER	NONE	intergenic_region	Khdrbs2-Prim2	n.33101582C>G
chr1	33101781	A	G	1805	54	0.962963	0	0,0,36,18	MODIFIER	NONE	intergenic_region	Khdrbs2-Prim2	n.33101781A>G
chr1	33101880	G	GT	1120	48	0.854167	0	4,2,26,15	MODIFIER	NONE	intergenic_region	Khdrbs2-Prim2	n.33101880_33101881insT
chr1	33101907	C	G	1816	59	0.898305	0	0,0,35,24	MODIFIER	NONE	intergenic_region	Khdrbs2-Prim2	n.33101907C>G
chr1	33101932	A	G	2552	82	0.914634	0	0,0,40,42	MODIFIER	NONE	intergenic_region	Khdrbs2-Prim2	n.33101932A>G
chr1	33101948	A	G	2582	82	0.914634	0	0,0,36,46	MODIFIER	NONE	intergenic_region	Khdrbs2-Prim2	n.33101948A>G
chr1	33101980	T	C	2256	73	0.917808	0	0,0,24,49	MODIFIER	NONE	intergenic_region	Khdrbs2-Prim2	n.33101980T>C
chr1	33101999	C	G	2365	73	0.931507	0	0,0,30,43	MODIFIER	NONE	intergenic_region	Khdrbs2-Prim2	n.33101999C>G
chr1	33102030	A	G	1804	53	0.981132	0	0,0,25,28	MODIFIER	NONE	intergenic_region	Khdrbs2-Prim2	n.33102030A>G
chr1	33102145	G	A	1705	52	0.942308	0	0,0,31,20	MODIFIER	NONE	intergenic_region	Khdrbs2-Prim2	n.33102145G>A
chr1	33102147	A	G	1809	54	0.981481	0	0,0,34,20	MODIFIER	NONE	intergenic_region	Khdrbs2-Prim2	n.33102147A>G
chr1	33102181	C	T	2558	73	1	0	0,0,54,19	MODIFIER	NONE	intergenic_region	Khdrbs2-Prim2	n.33102181C>T
chr1	33102307	T	C	3954	115	0.973913	0	0,0,42,73	MODIFIER	NONE	intergenic_region	Khdrbs2-Prim2	n.33102307T>C
chr1	33102308	G	T	3723	114	0.929825	0	0,0,41,73	MODIFIER	NONE	intergenic_region	Khdrbs2-Prim2	n.33102308G>T
chr1	33102467	A	G	1679	55	0.890909	0	0,0,38,17	MODIFIER	NONE	intergenic_region	Khdrbs2-Prim2	n.33102467A>G
chr1	33102543	A	G	4442	134	0.932836	0	0,0,92,42	MODIFIER	NONE	intergenic_region	Khdrbs2-Prim2	n.33102543A>G
chr1	33102550	G	A	5135	146	0.979452	0	0,0,103,43	MODIFIER	NONE	intergenic_region	Khdrbs2-Prim2	n.33102550G>A
chr1	33102818	AT	A	1753	54	0.87037	0	0,8,2,45	MODIFIER	NONE	intergenic_region	Khdrbs2-Prim2	n.33102819delT
chr1	33108921	T	A	1778	50	0.96	0	0,0,34,16	MODIFIER	NONE	intergenic_region	Khdrbs2-Prim2	n.33108921T>A
chr1	33108939	C	T	2228	63	0.952381	0	0,0,36,27	MODIFIER	NONE	intergenic_region	Khdrbs2-Prim2	n.33108939C>T
chr1	33108942	T	A	2377	64	1	0	0,0,36,28	MODIFIER	NONE	intergenic_region	Khdrbs2-Prim2	n.33108942T>A
chr1	33109060	A	G	2550	76	0.907895	0	0,0,37,39	MODIFIER	NONE	intergenic_region	Khdrbs2-Prim2	n.33109060A>G
chr1	33109080	G	A	2118	65	0.892308	0	0,0,33,31	MODIFIER	NONE	intergenic_region	Khdrbs2-Prim2	n.33109080G>A
chr1	33109082	A	G	2245	66	0.939394	0	0,0,35,31	MODIFIER	NONE	intergenic_region	Khdrbs2-Prim2	n.33109082A>G
chr1	33109133	G	A	2742	78	0.961538	0	0,0,47,31	MODIFIER	NONE	intergenic_region	Khdrbs2-Prim2	n.33109133G>A
chr1	33109244	G	A	2400	69	0.956522	0	0,0,19,50	MODIFIER	NONE	intergenic_region	Khdrbs2-Prim2	n.33109244G>A
chr1	33373146	T	TGG	241	48	0.270833	5	16,11,5,8	MODIFIER	NONE	intergenic_region	Khdrbs2-Prim2	n.33373146_33373147insGG
chr1	33373146	T	TG	266	48	0.291667	20	16,11,2,12	MODIFIER	NONE	intergenic_region	Khdrbs2-Prim2	n.33373146_33373147insG
chr1	33454246	C	T	628	93	0.247312	6	42,28,10,13	MODERATE	NONE	missense_variant	Prim2	c.1358G>A
chr1	33482351	A	C	8461	251	0.972112	0	0,0,134,117	MODIFIER	NONE	intron_variant	Prim2	c.1148-1811T>G
chr1	33482445	A	G	8042	229	0.969432	0	0,0,86,143	MODIFIER	NONE	intron_variant	Prim2	c.1148-1905T>C
chr1	33512088	A	G	1801	56	0.892857	0	0,0,39,17	LOW	NONE	synonymous_variant	Prim2	c.948T>C
chr1	33514094	A	C	2243	66	0.939394	0	0,0,56,10	MODIFIER	NONE	intron_variant	Prim2	c.834+51T>G
chr1	33658060	G	A	4637	130	0.969231	0	0,0,61,69	MODIFIER	NONE	intron_variant	Prim2	c.459+4186C>T
chr1	33658072	T	C	4569	131	0.969466	0	0,1,55,75	MODIFIER	NONE	intron_variant	Prim2	c.459+4174A>G
chr1	33658097	A	G	4116	114	0.964912	0	0,0,39,75	MODIFIER	NONE	intron_variant	Prim2	c.459+4149T>C
chr1	33662410	AT	A	1113	69	0.695652	11	9,11,10,38	MODIFIER	NONE	intron_variant	Prim2	c.339-45delA
chr1	33667169	G	A	3994	112	0.982143	0	0,0,13,99	MODIFIER	MODIFIER	NONE	NONE	upstream_gene_variant
chr1	33724924	T	C	4796	139	0.935252	0	0,0,95,44	MODIFIER	MODIFIER	NONE	NONE	intron_variant
chr1	33739273	A	G	3502	100	0.97	0	0,0,74,26	MODERATE	MODERATE	NONE	NONE	missense_variant
chr1	33746779	T	G	1657	199	0.296482	2	100,37,48,14	MODERATE	MODIFIER	MODIFIER	NONE	NONE
chr1	33748138	A	G	5401	156	0.942308	0	0,0,149,7	MODIFIER	NONE	intron_variant	Bag2	c.223+79T>C
chr1	33748248	T	C	17964	505	0.974257	0	0,0,272,233	LOW	NONE	synonymous_variant	Bag2	c.192A>G
chr1	33762216	TA	T	88	94	0.085106	1	25,64,1,7	LOW	LOW	MODIFIER	NONE	NONE
chr1	33805293	C	CTT	2849	87	0.965517	0	4,1,64,20	MODIFIER	MODIFIER	MODIFIER	NONE	NONE
chr1	34173047	T	A	399	54	0.259259	0	19,21,6,8	MODERATE	MODERATE	MODERATE	MODERATE	NONE
chr1	34201267	G	A	730	92	0.293478	0	30,28,18,16	MODERATE	MODERATE	MODERATE	NONE	NONE
chr1	34439792	A	C	372	50	0.26	4	31,6,13,0	MODIFIER	MODIFIER	MODIFIER	NONE	NONE
chr1	34442944	G	C	1387	217	0.235023	0	81,81,27,28	MODERATE	MODIFIER	NONE	NONE	missense_variant
chr1	34589107	A	C	1458	192	0.276042	22	70,65,42,15	MODIFIER	NONE	3_prime_UTR_variant	Amer3	c.*83A>C
chr1	36521320	C	T	6665	192	0.947917	0	0,0,75,117	LOW	LOW	NONE	NONE	synonymous_variant
chr1	36564917	GGA	G	78	105	0.028571	0	25,75,0,3	MODIFIER	MODIFIER	NONE	NONE	intron_variant
chr1	36702581	G	A	1307	181	0.265193	3	66,64,22,29	MODERATE	NONE	missense_variant	Actr1b	c.209C>T
chr1	36779127	G	A	1379	197	0.258883	2	44,96,21,36	LOW	LOW	LOW	MODIFIER	NONE
chr1	37060387	C	T	1299	130	0.369231	3	42,40,21,27	MODIFIER	NONE	intergenic_region	Tmem131-Cnga3	n.37060387C>T
chr1	37261135	C	T	360	52	0.25	4	15,23,8,6	MODERATE	MODERATE	NONE	NONE	missense_variant
chr1	37452638	TA	T	96	130	0.076923	1	19,103,2,8	MODIFIER	MODIFIER	NONE	NONE	intron_variant
chr1	37487316	G	A	866	66	0.424242	3	5,32,2,27	MODIFIER	MODIFIER	MODIFIER	NONE	NONE
chr1	37811033	A	C	647	106	0.235849	3	21,60,4,21	LOW	LOW	LOW	LOW	NONE
chr1	37990169	TTTTG	T	71	189	0.015873	0	135,52,2,1	MODIFIER	NONE	intron_variant	Txndc9	c.563+30_563+33delCAAA
chr1	38185373	T	G	610	81	0.271605	0	27,31,12,11	MODERATE	NONE	missense_variant	Aff3	c.3246A>C
chr1	38865606	T	C	2836	82	0.963415	0	0,0,41,41	LOW	NONE	synonymous_variant	Chst10	c.1017A>G
chr1	38867869	T	C	104	65	0.076923	0	59,1,5,0	MODIFIER	NONE	intron_variant	Chst10	c.587+112A>G
chr1	38867884	T	C	103	83	0.060241	0	72,6,5,0	MODIFIER	NONE	intron_variant	Chst10	c.587+97A>G
chr1	38867914	T	C	4532	127	0.968504	0	0,0,101,26	MODIFIER	NONE	intron_variant	Chst10	c.587+67A>G
chr1	38871764	A	G	3691	107	0.943925	0	0,0,26,81	LOW	NONE	synonymous_variant	Chst10	c.318T>C
chr1	38873915	G	A	3003	86	0.965116	0	0,0,65,21	MODIFIER	NONE	intron_variant	Chst10	c.246+34C>T
chr1	38907999	A	G	3899	112	0.946429	0	0,0,55,57	MODIFIER	NONE	intergenic_region	Chst10-Nms	n.38907999A>G
chr1	38908141	C	G	3990	124	0.903226	0	0,0,93,31	MODIFIER	NONE	intergenic_region	Chst10-Nms	n.38908141C>G
chr1	38908164	T	C	6009	167	0.97006	0	0,0,118,49	MODIFIER	NONE	intergenic_region	Chst10-Nms	n.38908164T>C
chr1	38908322	C	T	10155	285	0.961403	3	1,0,134,150	MODIFIER	NONE	intergenic_region	Chst10-Nms	n.38908322C>T
chr1	38908498	T	C	8358	247	0.939271	0	0,0,151,96	MODIFIER	NONE	intergenic_region	Chst10-Nms	n.38908498T>C
chr1	38908746	TA	T	1562	106	0.584906	19	7,39,1,61	MODIFIER	NONE	intergenic_region	Chst10-Nms	n.38908747delA
chr1	38908747	AA	A	210	104	0.230769	1	5,77,2,22	MODIFIER	NONE	intergenic_region	Chst10-Nms	n.38908748delA
chr1	38939391	G	A	1730	50	0.96	0	0,0,11,39	MODIFIER	MODIFIER	NONE	NONE	intron_variant
chr1	38943864	A	G	2340	67	0.940298	0	0,0,52,15	MODIFIER	MODIFIER	NONE	NONE	intron_variant
chr1	38943872	C	T	2710	76	0.986842	0	0,0,58,18	MODIFIER	MODIFIER	NONE	NONE	intron_variant
chr1	38944088	G	A	3332	91	0.978022	0	0,0,38,53	LOW	LOW	NONE	NONE	synonymous_variant
chr1	38947006	A	T	6154	173	0.965318	0	0,0,65,108	MODIFIER	MODIFIER	NONE	NONE	intron_variant
chr1	38947482	A	C	2231	63	0.952381	0	0,0,47,16	MODIFIER	MODIFIER	NONE	NONE	intron_variant
chr1	38948596	ATT	A	2557	98	0.959184	2	4,0,72,22	MODIFIER	MODIFIER	NONE	NONE	intron_variant
chr1	38948747	T	G	1951	53	1	0	0,0,3,50	MODIFIER	MODIFIER	NONE	NONE	intron_variant
chr1	38994925	C	T	3327	93	0.956989	0	0,0,49,44	LOW	NONE	synonymous_variant	Pdcl3	c.147C>T
chr1	38996026	A	C	2564	76	0.947368	0	0,0,13,63	MODIFIER	NONE	intron_variant	Pdcl3	c.580+83A>C
chr1	38996081	AG	A	2022	62	0.967742	0	2,1,34,26	MODIFIER	NONE	intron_variant	Pdcl3	c.581-59delG
chr1	38996207	C	T	3295	99	0.929293	0	0,0,57,42	MODERATE	NONE	missense_variant	Pdcl3	c.647C>T
chr1	38996286	T	C	3750	108	0.953704	0	0,0,42,66	MODIFIER	NONE	3_prime_UTR_variant	Pdcl3	c.*3T>C
chr1	39345298	G	A	559	63	0.31746	3	37,5,17,4	LOW	NONE	synonymous_variant	Npas2	c.1671G>A
chr1	39426030	T	G	1085	112	0.339286	15	55,19,35,3	MODIFIER	NONE	intron_variant	Tbc1d8	c.238+38A>C
chr1	39718340	C	A	86	101	0.069307	9	67,10,21,0	MODIFIER	NONE	intron_variant	Rfx8	c.189+78G>T
chr1	40121009	T	G	777	59	0.440678	0	9,23,8,19	LOW	NONE	synonymous_variant	Il1r2	c.888T>G
chr1	40409500	G	A	250	60	0.166667	0	24,23,7,6	MODIFIER	NONE	intergenic_region	Il1rl2-Il1rl1	n.40409500G>A
chr1	40409509	A	G	328	65	0.2	0	24,27,7,7	MODIFIER	NONE	intergenic_region	Il1rl2-Il1rl1	n.40409509A>G
chr1	40409516	T	A	348	67	0.208955	1	24,29,7,7	MODIFIER	NONE	intergenic_region	Il1rl2-Il1rl1	n.40409516T>A
chr1	40409525	C	T	352	66	0.212121	0	24,28,7,7	MODIFIER	NONE	intergenic_region	Il1rl2-Il1rl1	n.40409525C>T
chr1	40409529	T	A	248	67	0.149254	1	24,29,7,7	MODIFIER	NONE	intergenic_region	Il1rl2-Il1rl1	n.40409529T>A
chr1	40409564	A	G	319	50	0.26	4	11,25,7,7	MODIFIER	NONE	intergenic_region	Il1rl2-Il1rl1	n.40409564A>G
chr1	40451750	C	T	294	57	0.192982	0	22,22,7,6	MODERATE	MODIFIER	MODIFIER	NONE	NONE
chr1	40498521	T	TC	735	142	0.204225	0	56,57,14,15	HIGH	NONE	frameshift_variant	Il18r1	c.1451dupC
chr1	40738439	G	A	3192	113	0.849558	9	1,1,106,5	MODIFIER	NONE	intron_variant	Slc9a2	c.1008-4181G>A
chr1	40738460	C	G	2120	132	0.575758	4	1,1,99,25	MODIFIER	NONE	intron_variant	Slc9a2	c.1008-4160C>G
chr1	40738469	T	TTTTTCCCC	552	143	0.195804	17	53,7,18,10	MODIFIER	NONE	intron_variant	Slc9a2	c.1008-4151_1008-4150insTTTTCCCC
chr1	40738469	T	TTTCCCC	272	143	0.104895	52	53,7,4,11	MODIFIER	NONE	intron_variant	Slc9a2	c.1008-4151_1008-4150insTTCCCC
chr1	40738469	T	TTTTCCCC	419	143	0.153846	38	53,7,10,12	MODIFIER	NONE	intron_variant	Slc9a2	c.1008-4151_1008-4150insTTTCCCC
chr1	41182858	C	A	202	211	0.047393	1	130,71,6,4	MODIFIER	MODIFIER	NONE	NONE	upstream_gene_variant
chr1	41182901	TC	T	271	226	0.048673	1	103,116,6,5	MODIFIER	MODIFIER	NONE	NONE	upstream_gene_variant
chr1	41182938	G	C	199	161	0.062112	7	45,104,6,6	MODIFIER	MODIFIER	NONE	NONE	upstream_gene_variant
chr1	41182948	A	G	98	130	0.038462	0	22,101,1,6	MODIFIER	MODIFIER	NONE	NONE	upstream_gene_variant
chr1	42879930	A	C	1312	168	0.285714	5	45,74,14,35	LOW	NONE	splice_region_variant&intron_variant	Mrps9	c.409+4A>C
chr1	42895424	G	C	115	177	0.033898	3	56,115,3,3	LOW	NONE	splice_region_variant&intron_variant	Mrps9	c.557+7G>C
chr1	42905474	A	T	619	91	0.241758	0	26,43,9,13	MODERATE	NONE	missense_variant	Mrps9	c.1151A>T
chr1	43918903	C	T	222	197	0.060914	14	113,72,11,1	MODIFIER	NONE	intergenic_region	Uxs1-Tpp2	n.43918903C>T
chr1	43918971	C	T	170	326	0.03681	5	176,137,5,8	MODIFIER	NONE	intergenic_region	Uxs1-Tpp2	n.43918971C>T
chr1	43918983	A	C	170	343	0.034985	2	172,159,5,7	MODIFIER	NONE	intergenic_region	Uxs1-Tpp2	n.43918983A>C
chr1	43918987	A	G	599	339	0.094395	5	157,150,13,19	MODIFIER	NONE	intergenic_region	Uxs1-Tpp2	n.43918987A>G
chr1	43919001	C	T	124	335	0.026866	2	161,165,3,6	MODIFIER	NONE	intergenic_region	Uxs1-Tpp2	n.43919001C>T
chr1	43919007	T	C	265	318	0.050314	32	149,153,1,15	MODIFIER	NONE	intergenic_region	Uxs1-Tpp2	n.43919007T>C
chr1	43972508	AT	A	75	74	0.094595	4	52,16,4,3	MODIFIER	MODIFIER	NONE	NONE	intron_variant
chr1	44110156	C	T	721	50	0.5	0	0,25,1,24	MODIFIER	NONE	intron_variant	Kdelc1	c.1294-73G>A
chr1	44781110	A	C	1360	110	0.418182	3	21,41,20,28	LOW	NONE	splice_region_variant&intron_variant	Gulp1	c.748+4A>C
chr1	45340698	GT	G	243	74	0.243243	10	23,32,3,15	MODIFIER	NONE	intron_variant	Col3a1	c.2658+16delT
chr1	45436480	G	GAAT	115	67	0.059701	0	7,57,0,4	MODIFIER	NONE	intron_variant	Col5a2	c.364-70_364-69insATT
chr1	45912419	C	T	955	94	0.351064	2	31,26,23,14	MODERATE	NONE	missense_variant	Slc40a1	c.577G>A
chr1	45982064	T	TA	80	74	0.108108	0	4,70,0,8	MODIFIER	NONE	intergenic_region	Slc40a1-Stk-ps2	n.45982064_45982065insA
chr1	46097999	C	A	1873	247	0.275304	1	108,64,50,25	MODERATE	NONE	missense_variant&splice_region_variant	Dnah7b	c.532C>A
chr1	46109303	G	C	85	622	0.009646	1	369,246,3,3	MODERATE	NONE	missense_variant	Dnah7b	c.838G>C
chr1	46116155	C	CT	212	98	0.142857	0	81,3,14,0	MODIFIER	NONE	intron_variant	Dnah7b	c.876-14_876-13insT
chr1	46187113	T	A	122	79	0.075949	2	62,9,8,0	MODIFIER	NONE	intron_variant	Dnah7b	c.3745-42T>A
chr1	46187117	A	T	120	83	0.072289	2	63,12,8,0	MODIFIER	NONE	intron_variant	Dnah7b	c.3745-38A>T
chr1	46188719	TAC	T	127	97	0.072165	7	26,64,0,7	MODIFIER	NONE	intron_variant	Dnah7b	c.4067+35_4067+36delAC
chr1	46204305	C	G	1134	169	0.248521	1	35,88,15,31	MODERATE	NONE	missense_variant	Dnah7b	c.4768C>G
chr1	46233781	T	C	148	283	0.031802	18	107,166,0,9	LOW	NONE	synonymous_variant	Dnah7b	c.7068T>C
chr1	46289618	T	G	603	103	0.213592	0	35,45,9,13	MODERATE	NONE	missense_variant	Dnah7b	c.9509T>G
chr1	46417021	AAATAAT	A	187	113	0.061947	10	31,65,0,7	MODIFIER	NONE	intergenic_region	Dnah7b-Dnah7c	n.46417022_46417027delAATAAT
chr1	46417021	AAAT	A	396	113	0.115044	17	31,65,0,13	MODIFIER	NONE	intergenic_region	Dnah7b-Dnah7c	n.46417022_46417024delAAT
chr1	46515502	C	T	127	72	0.083333	4	12,54,2,4	MODIFIER	NONE	intron_variant	Dnah7c	c.1353+43C>T
chr1	46607351	C	A	88	54	0.074074	6	48,2,3,1	MODIFIER	NONE	intron_variant	Dnah7c	c.3613-62C>A
chr1	46607423	A	G	117	144	0.041667	1	91,46,4,3	MODERATE	NONE	missense_variant	Dnah7c	c.3623A>G
chr1	46608881	T	C	744	163	0.196319	5	97,32,22,12	LOW	NONE	splice_region_variant&intron_variant	Dnah7c	c.3826-5T>C
chr1	46612553	T	G	977	91	0.373626	3	46,11,25,9	MODIFIER	NONE	intron_variant	Dnah7c	c.3936-11T>G
chr1	46636459	A	C	1038	100	0.37	0	51,11,31,7	MODERATE	NONE	missense_variant	Dnah7c	c.4908A>C
chr1	46672676	G	A	2847	264	0.363636	5	63,100,46,55	MODERATE	NONE	missense_variant	Dnah7c	c.8062G>A
chr1	46760246	T	G	572	111	0.216216	0	60,25,19,7	MODIFIER	NONE	intron_variant	Dnah7c	c.10084-19T>G
chr1	47068014	G	A	1733	57	0.929825	0	0,0,20,37	MODIFIER	NONE	intergenic_region	Slc39a10-Mir6350	n.47068014G>A
chr1	48881899	G	A	3244	408	0.281863	0	123,168,51,66	MODIFIER	NONE	intergenic_region	Mir6350-Tmeff2	n.48881899G>A
chr1	48882177	AAC	A	124	183	0.054645	31	94,81,0,10	MODIFIER	NONE	intergenic_region	Mir6350-Tmeff2	n.48882178_48882179delAC
chr1	48882180	ACCC	A	271	170	0.129412	0	35,28,11,11	MODIFIER	NONE	intergenic_region	Mir6350-Tmeff2	n.48882181_48882183delCCC
chr1	48882180	ACC	A	1651	170	0.529412	2	35,28,45,45	MODIFIER	NONE	intergenic_region	Mir6350-Tmeff2	n.48882181_48882182delCC
chr1	48882415	C	G	8039	227	0.977974	0	0,0,114,113	MODIFIER	NONE	intergenic_region	Mir6350-Tmeff2	n.48882415C>G
chr1	51289808	A	G	7782	224	0.955357	0	0,0,123,100	LOW	MODIFIER	NONE	NONE	synonymous_variant
chr1	51751341	TCGGGGG	T	523	48	0.541667	9	9,13,5,21	MODIFIER	MODIFIER	MODIFIER	NONE	NONE
chr1	51751341	TCGGGGGG	T	163	48	0.125	8	9,13,0,6	MODIFIER	MODIFIER	MODIFIER	NONE	NONE
chr1	51757265	AAG	A	119	53	0.075472	8	22,28,0,4	MODIFIER	MODIFIER	MODIFIER	NONE	NONE
chr1	51760282	A	C	2030	60	0.933333	0	0,0,44,16	MODIFIER	MODIFIER	MODIFIER	NONE	NONE
chr1	51762467	A	G	2840	79	0.987342	0	0,0,58,21	MODIFIER	MODIFIER	MODIFIER	NONE	NONE
chr1	51768838	A	C	1982	57	0.947368	0	0,0,29,28	MODIFIER	MODIFIER	MODIFIER	NONE	NONE
chr1	51768839	G	A	1827	56	0.892857	0	0,0,29,27	MODIFIER	MODIFIER	MODIFIER	NONE	NONE
chr1	51768885	C	T	3198	94	0.93617	0	0,0,80,14	MODIFIER	MODIFIER	MODIFIER	NONE	NONE
chr1	51768936	A	G	8198	243	0.925926	0	0,0,191,52	MODIFIER	MODIFIER	MODIFIER	NONE	NONE
chr1	51769109	G	C	6946	202	0.955446	0	0,0,41,161	MODIFIER	MODIFIER	MODIFIER	NONE	NONE
chr1	51769127	ATG	A	2941	132	0.621212	22	12,39,5,77	MODIFIER	MODIFIER	MODIFIER	NONE	NONE
chr1	51769155	TTA	T	777	66	0.651515	8	2,24,0,43	MODIFIER	MODIFIER	MODIFIER	NONE	NONE
chr1	51770671	G	A	3357	102	0.901961	0	0,0,98,4	MODIFIER	MODIFIER	MODIFIER	NONE	NONE
chr1	51770845	G	A	7660	220	0.945455	0	0,0,65,155	MODERATE	MODERATE	MODERATE	NONE	NONE
chr1	51774268	A	C	3130	89	0.955056	0	0,0,76,13	MODIFIER	MODIFIER	MODIFIER	NONE	NONE
chr1	51778374	C	T	2550	72	0.958333	0	0,0,43,29	LOW	LOW	LOW	NONE	NONE
chr1	51778467	G	A	3401	99	0.939394	0	0,0,56,43	LOW	LOW	LOW	NONE	NONE
chr1	51778571	T	C	1701	52	0.923077	0	0,0,9,43	MODIFIER	MODIFIER	MODIFIER	NONE	NONE
chr1	51801180	T	A	536	95	0.210526	2	39,36,12,8	LOW	LOW	LOW	NONE	NONE
chr1	51824047	C	CG	3148	88	0.954545	3	3,1,72,12	MODIFIER	MODIFIER	MODIFIER	NONE	NONE
chr1	51938313	A	G	4851	141	0.943262	0	0,0,75,66	MODIFIER	NONE	intergenic_region	Myo1b-Stat4	n.51938313A>G
chr1	51938326	A	T	4859	137	0.963504	0	0,0,69,68	MODIFIER	NONE	intergenic_region	Myo1b-Stat4	n.51938326A>T
chr1	51938366	T	A	4443	127	0.952756	0	0,0,56,71	MODIFIER	NONE	intergenic_region	Myo1b-Stat4	n.51938366T>A
chr1	51938376	C	A	4562	131	0.977099	0	0,0,57,74	MODIFIER	NONE	intergenic_region	Myo1b-Stat4	n.51938376C>A
chr1	51938513	T	TTCCC	4651	157	0.847134	5	11,14,75,58	MODIFIER	NONE	intergenic_region	Myo1b-Stat4	n.51938513_51938514insTCCC
chr1	51938555	T	C	5391	152	0.973684	0	0,0,67,85	MODIFIER	NONE	intergenic_region	Myo1b-Stat4	n.51938555T>C
chr1	51938573	T	C	4879	140	0.957143	0	0,0,55,85	MODIFIER	NONE	intergenic_region	Myo1b-Stat4	n.51938573T>C
chr1	51938679	G	A	1631	50	0.96	0	0,0,9,41	MODIFIER	NONE	intergenic_region	Myo1b-Stat4	n.51938679G>A
chr1	51940777	C	T	3371	103	0.980583	0	0,0,82,21	MODIFIER	NONE	intergenic_region	Myo1b-Stat4	n.51940777C>T
chr1	51940812	C	T	4695	140	0.964286	0	0,0,91,49	MODIFIER	NONE	intergenic_region	Myo1b-Stat4	n.51940812C>T
chr1	51940871	C	CA	325	131	0.496183	2	32,37,34,31	MODIFIER	NONE	intergenic_region	Myo1b-Stat4	n.51940871_51940872insA
chr1	51940876	T	A	404	122	0.967213	0	0,0,62,60	MODIFIER	NONE	intergenic_region	Myo1b-Stat4	n.51940876T>A
chr1	51940921	T	C	4653	146	0.979452	0	0,0,93,53	MODIFIER	NONE	intergenic_region	Myo1b-Stat4	n.51940921T>C
chr1	51940975	C	T	8483	240	0.979167	0	0,0,146,94	MODIFIER	NONE	intergenic_region	Myo1b-Stat4	n.51940975C>T
chr1	51941131	T	C	5999	184	0.945652	0	0,0,80,104	MODIFIER	NONE	intergenic_region	Myo1b-Stat4	n.51941131T>C
chr1	51941132	G	C	5913	180	0.933333	0	0,0,78,102	MODIFIER	NONE	intergenic_region	Myo1b-Stat4	n.51941132G>C
chr1	51941244	G	GT	5172	154	0.954545	1	2,6,51,96	MODIFIER	NONE	intergenic_region	Myo1b-Stat4	n.51941244_51941245insT
chr1	51941290	C	G	2865	86	0.94186	0	0,0,19,67	MODIFIER	NONE	intergenic_region	Myo1b-Stat4	n.51941290C>G
chr1	51941319	C	T	1795	54	0.925926	0	0,0,6,48	MODIFIER	NONE	intergenic_region	Myo1b-Stat4	n.51941319C>T
chr1	52068672	T	G	1810	50	0.96	0	0,0,42,8	MODIFIER	MODIFIER	NONE	NONE	intron_variant
chr1	52068677	A	G	1954	53	0.981132	0	0,0,45,8	MODIFIER	MODIFIER	NONE	NONE	intron_variant
chr1	52068701	T	A	2410	66	0.984848	0	0,0,51,15	MODIFIER	MODIFIER	NONE	NONE	intron_variant
chr1	52068703	A	G	2460	68	0.985294	0	0,0,53,15	MODIFIER	MODIFIER	NONE	NONE	intron_variant
chr1	52068784	T	C	3491	102	0.941176	0	0,0,46,56	LOW	LOW	NONE	NONE	synonymous_variant
chr1	52068796	G	A	3432	95	0.989474	0	0,0,40,55	LOW	LOW	NONE	NONE	synonymous_variant
chr1	52074790	C	G	2809	81	0.962963	0	0,0,13,68	MODIFIER	MODIFIER	NONE	NONE	intron_variant
chr1	52082632	A	T	1872	55	0.963636	0	0,0,14,41	MODIFIER	MODIFIER	NONE	NONE	intron_variant
chr1	52090575	C	CT	137	157	0.076433	3	138,6,11,1	MODIFIER	MODIFIER	NONE	NONE	intron_variant
chr1	52090575	CT	C	132	157	0.076433	0	138,7,12,0	MODIFIER	MODIFIER	NONE	NONE	intron_variant
chr1	52090654	T	C	485	683	0.048316	1	441,209,21,12	MODIFIER	MODIFIER	NONE	NONE	intron_variant
chr1	52090691	G	A	616	871	0.04822	0	473,355,25,18	MODIFIER	MODIFIER	NONE	NONE	intron_variant
chr1	52090700	CCTT	C	682	891	0.04826	1	465,389,25,18	MODIFIER	MODIFIER	NONE	NONE	intron_variant
chr1	52090756	T	C	97	856	0.010514	0	386,461,4,5	MODIFIER	MODIFIER	NONE	NONE	intron_variant
chr1	52101996	T	TA	273	54	0.333333	2	21,13,13,5	MODIFIER	MODIFIER	NONE	NONE	intron_variant
chr1	52187729	C	T	429	62	0.258065	1	24,21,10,7	HIGH	MODIFIER	NONE	NONE	stop_gained
chr1	52464773	G	A	2559	71	0.971831	0	0,0,43,28	MODIFIER	NONE	intron_variant	Nab1	c.1255+12C>T
chr1	52490035	T	G	4155	121	0.950413	0	1,0,87,33	LOW	NONE	synonymous_variant	Nab1	c.702A>C
chr1	52490118	G	A	6683	196	0.938776	0	0,0,85,111	MODERATE	NONE	missense_variant	Nab1	c.619C>T
chr1	52490248	A	G	3607	104	0.971154	0	0,0,62,42	LOW	NONE	synonymous_variant	Nab1	c.489T>C
chr1	52640958	G	A	2240	62	0.983871	0	0,0,33,29	MODERATE	MODIFIER	NONE	NONE	missense_variant
chr1	52640964	A	G	2192	62	0.967742	0	0,0,32,30	MODERATE	MODIFIER	NONE	NONE	missense_variant
chr1	52640990	A	C	2347	65	0.969231	0	0,0,32,33	LOW	MODIFIER	NONE	NONE	synonymous_variant
chr1	52642296	CT	C	3486	113	0.955752	2	5,0,84,24	MODIFIER	MODIFIER	NONE	NONE	intron_variant
chr1	52651922	C	T	3159	88	0.977273	0	0,0,37,51	MODIFIER	MODIFIER	MODIFIER	MODIFIER	NONE
chr1	52651968	A	T	2311	64	0.984375	0	0,0,17,47	MODIFIER	MODIFIER	MODIFIER	MODIFIER	NONE
chr1	52657015	T	C	8224	230	0.965217	0	0,0,89,141	MODIFIER	MODIFIER	NONE	NONE	3_prime_UTR_variant
chr1	52657095	C	T	2438	73	0.917808	0	0,0,8,65	MODIFIER	MODIFIER	NONE	NONE	3_prime_UTR_variant
chr1	52660606	T	TTTG	235	113	0.584071	2	39,8,58,8	MODIFIER	MODIFIER	NONE	NONE	3_prime_UTR_variant
chr1	52660610	T	TTTG	147	120	0.241667	11	68,16,28,1	MODIFIER	MODIFIER	NONE	NONE	3_prime_UTR_variant
chr1	52660635	T	C	6682	189	0.968254	0	0,0,132,57	MODIFIER	MODIFIER	NONE	NONE	3_prime_UTR_variant
chr1	52663361	T	C	4077	119	0.94958	0	0,0,46,73	LOW	LOW	NONE	NONE	synonymous_variant
chr1	52663481	T	C	1620	50	0.88	0	0,0,12,37	MODIFIER	MODIFIER	NONE	NONE	intron_variant
chr1	52708829	T	C	3328	91	0.989011	0	0,0,43,48	LOW	LOW	NONE	NONE	synonymous_variant
chr1	52789662	T	TGA	2606	77	0.935065	0	4,1,58,14	MODIFIER	NONE	3_prime_UTR_variant	Inpp1	c.*4_*5dupTC
chr1	52789668	T	C	2859	91	0.89011	0	0,0,71,20	LOW	NONE	stop_retained_variant	Inpp1	c.1191A>G
chr1	52789971	C	T	4193	126	0.904762	0	0,0,54,72	LOW	NONE	synonymous_variant	Inpp1	c.888G>A
chr1	52794673	G	A	5698	171	0.906433	0	0,0,70,101	LOW	NONE	splice_region_variant&intron_variant	Inpp1	c.266-3C>T
chr1	52794729	A	G	2404	69	0.971014	0	0,0,7,62	MODIFIER	NONE	intron_variant	Inpp1	c.266-59T>C
chr1	52799229	A	G	3283	93	0.967742	0	0,0,90,3	MODIFIER	NONE	intron_variant	Inpp1	c.204+56T>C
chr1	52799453	G	A	2823	81	0.950617	0	0,0,25,56	LOW	NONE	synonymous_variant	Inpp1	c.36C>T
chr1	52799461	A	G	2746	79	0.936709	0	0,0,24,55	MODERATE	NONE	missense_variant	Inpp1	c.28T>C
chr1	52845159	A	G	5254	159	0.91195	0	0,0,54,105	MODIFIER	NONE	intron_variant	Hibch	c.35+15A>G
chr1	52853648	C	A	3740	106	0.943396	0	0,0,56,50	MODIFIER	NONE	intron_variant	Hibch	c.36-20C>A
chr1	52905299	C	T	5961	170	0.988235	0	0,0,168,2	MODIFIER	NONE	intron_variant	Hibch	c.807-72C>T
chr1	52905341	C	CAT	10380	333	0.942943	1	17,7,234,80	MODIFIER	NONE	intron_variant	Hibch	c.807-30_807-29insAT
chr1	52905464	A	G	15938	455	0.96044	0	0,0,155,300	MODIFIER	NONE	intron_variant	Hibch	c.888+12A>G
chr1	52905494	C	T	9390	279	0.935484	0	0,0,49,230	MODIFIER	NONE	intron_variant	Hibch	c.888+42C>T
chr1	52905511	T	G	7259	218	0.93578	0	0,2,22,194	MODIFIER	NONE	intron_variant	Hibch	c.888+59T>G
chr1	52905542	G	GTCCTAAAAAGCCTTTGAGAGCATTTC	466	128	0.117188	0	1,113,0,15	MODIFIER	NONE	intron_variant	Hibch	c.888+90_888+91insTCCTAAAAAGCCTTTGAGAGCATTTC
chr1	52925636	A	G	919	89	0.348315	0	32,23,19,15	MODIFIER	MODIFIER	NONE	NONE	5_prime_UTR_variant
chr1	53187658	A	G	103	65	0.153846	29	12,27,0,26	MODIFIER	MODIFIER	MODIFIER	NONE	NONE
chr1	53189323	C	T	3085	85	0.976471	0	0,0,48,37	MODIFIER	MODIFIER	NONE	NONE	3_prime_UTR_variant
chr1	53206616	G	A	3514	104	0.923077	0	0,0,60,44	MODERATE	NONE	missense_variant	Pms1	c.1763C>T
chr1	53207220	C	T	2405	69	0.971014	0	0,0,27,42	MODERATE	NONE	missense_variant	Pms1	c.1159G>A
chr1	53207931	T	C	2289	72	0.875	0	0,0,49,23	MODIFIER	NONE	intron_variant	Pms1	c.822+32A>G
chr1	53267790	TAC	T	208	88	0.079545	4	62,19,7,0	MODIFIER	NONE	intron_variant	Pms1	c.418+36_418+37delGT
chr1	53348262	G	A	1906	177	0.361582	5	38,70,30,39	MODERATE	MODIFIER	NONE	NONE	missense_variant
chr1	53397224	T	A	4895	150	0.906667	0	1,0,90,59	LOW	NONE	synonymous_variant	Dnah7a	c.11958A>T
chr1	53419586	T	G	1443	157	0.343949	10	61,37,45,14	MODERATE	NONE	missense_variant	Dnah7a	c.11392A>C
chr1	53456887	G	A	2530	76	0.973684	0	0,0,13,63	MODIFIER	NONE	intron_variant	Dnah7a	c.9426-16C>T
chr1	53457593	C	CATATAT	105	70	0.071429	0	49,8,5,0	MODIFIER	NONE	intron_variant	Dnah7a	c.9425+77_9425+78insATATAT
chr1	53468680	A	G	15631	450	0.975556	0	0,0,226,224	LOW	NONE	synonymous_variant	Dnah7a	c.9231T>C
chr1	53479759	A	G	1867	57	0.947368	0	1,1,21,34	LOW	NONE	synonymous_variant	Dnah7a	c.8838T>C
chr1	53479780	T	C	1905	60	0.933333	0	0,0,24,36	LOW	NONE	synonymous_variant	Dnah7a	c.8817A>G
chr1	53479803	G	C	1997	58	0.965517	0	0,0,19,39	MODERATE	NONE	missense_variant	Dnah7a	c.8794C>G
chr1	53501442	C	A	1773	58	0.982759	0	0,0,55,3	MODIFIER	NONE	intron_variant	Dnah7a	c.7736+36G>T
chr1	53504122	A	G	5685	186	0.962366	0	0,0,106,80	LOW	NONE	synonymous_variant	Dnah7a	c.6888T>C
chr1	53521202	G	A	5904	173	0.947977	0	0,0,74,99	LOW	NONE	synonymous_variant	Dnah7a	c.6309C>T
chr1	53537659	GA	G	553	50	0.54	0	2,12,3,24	MODIFIER	NONE	intron_variant	Dnah7a	c.4897-14delT
chr1	53537659	GAA	G	140	50	0.18	2	2,12,0,9	MODIFIER	NONE	intron_variant	Dnah7a	c.4897-15_4897-14delTT
chr1	53559103	G	A	4961	157	0.942675	0	0,0,69,88	LOW	NONE	synonymous_variant	Dnah7a	c.4272C>T
chr1	53559446	A	C	899	117	0.299145	0	12,69,5,31	MODIFIER	NONE	intron_variant	Dnah7a	c.4105-65T>G
chr1	53577336	T	TA	789	55	0.618182	13	11,10,8,26	LOW	NONE	splice_region_variant&intron_variant	Dnah7a	c.3472-8_3472-7insT
chr1	53584181	A	C	2395	84	0.857143	0	0,1,8,75	MODIFIER	NONE	intron_variant	Dnah7a	c.3272+277T>G
chr1	53584400	C	CA	3309	90	0.966667	0	3,0,67,20	MODIFIER	NONE	intron_variant	Dnah7a	c.3272+57_3272+58insT
chr1	53618247	T	G	2200	337	0.284866	2	119,119,53,45	MODERATE	NONE	missense_variant	Dnah7a	c.2369A>C
chr1	53618349	C	T	1798	190	0.331579	5	39,86,15,50	MODERATE	NONE	missense_variant	Dnah7a	c.2267G>A
chr1	53620895	G	GT	1084	54	0.740741	16	3,13,0,40	MODIFIER	NONE	intron_variant	Dnah7a	c.2059-107_2059-106insA
chr1	53623298	CA	C	938	88	0.545455	0	37,2,45,3	MODIFIER	NONE	intron_variant	Dnah7a	c.2058+44delT
chr1	53623333	T	C	5071	168	0.827381	0	0,0,146,22	MODIFIER	NONE	intron_variant	Dnah7a	c.2058+10A>G
chr1	53623500	A	T	13302	386	0.948187	0	0,0,155,231	MODERATE	NONE	missense_variant	Dnah7a	c.1901T>A
chr1	53627012	G	A	6328	179	0.960894	0	0,0,138,41	MODIFIER	NONE	intron_variant	Dnah7a	c.1833+22C>T
chr1	53635221	G	A	1606	50	0.92	0	0,0,36,14	MODIFIER	NONE	intron_variant	Dnah7a	c.1353+43C>T
chr1	53635226	A	G	1785	52	0.942308	0	0,0,36,16	MODIFIER	NONE	intron_variant	Dnah7a	c.1353+38T>C
chr1	53663819	C	T	9931	279	0.971326	0	0,0,175,104	LOW	NONE	synonymous_variant	Dnah7a	c.471G>A
chr1	53663832	G	A	10999	302	0.980132	0	0,0,176,126	MODERATE	NONE	missense_variant	Dnah7a	c.458C>T
chr1	53684931	T	C	3890	115	0.93913	0	0,0,71,44	MODIFIER	NONE	intron_variant	Dnah7a	c.340-32A>G
chr1	53686463	G	GT	2774	99	0.939394	0	5,0,78,15	MODIFIER	NONE	intron_variant	Dnah7a	c.250+35_250+36insA
chr1	53698709	C	T	4631	132	0.94697	0	0,0,39,93	MODIFIER	NONE	intron_variant	Dnah7a	c.79-15G>A
chr1	53702043	A	G	14449	416	0.944712	0	0,0,227,189	MODERATE	NONE	missense_variant	Dnah7a	c.53T>C
chr1	53757752	T	C	1747	52	0.923077	0	0,0,23,29	LOW	NONE	synonymous_variant	Stk17b	c.855A>G
chr1	53764033	T	C	2971	82	0.97561	0	0,0,48,34	LOW	NONE	splice_region_variant&synonymous_variant	Stk17b	c.606A>G
chr1	53771717	T	C	2525	75	0.933333	0	0,0,32,43	LOW	NONE	synonymous_variant	Stk17b	c.228A>G
chr1	53771740	T	G	2441	72	0.944444	0	0,0,34,38	LOW	NONE	synonymous_variant	Stk17b	c.205A>C
chr1	53776570	A	C	2624	78	0.948718	0	0,0,37,41	MODERATE	NONE	missense_variant	Stk17b	c.69T>G
chr1	53851653	A	G	5018	143	0.958042	0	0,0,52,91	LOW	MODIFIER	NONE	NONE	synonymous_variant
chr1	53851685	G	A	3235	99	0.939394	0	0,0,22,77	LOW	MODIFIER	NONE	NONE	splice_region_variant&synonymous_variant
chr1	53851690	T	C	2844	86	0.930233	0	0,0,14,72	LOW	MODIFIER	NONE	NONE	splice_region_variant&intron_variant
chr1	53887548	A	T	4838	139	0.956835	0	0,0,118,21	MODIFIER	NONE	intron_variant	Hecw2	c.3256+35T>A
chr1	53887720	A	G	2482	72	0.972222	0	0,0,5,67	MODIFIER	NONE	intron_variant	Hecw2	c.3154-35T>C
chr1	53891077	T	C	2607	80	0.925	0	0,0,62,18	MODIFIER	NONE	intron_variant	Hecw2	c.3153+49A>G
chr1	53904457	A	G	2954	84	0.964286	0	0,0,23,61	MODIFIER	NONE	intron_variant	Hecw2	c.2833-23T>C
chr1	53904479	A	T	2198	61	0.983607	0	0,0,11,50	MODIFIER	NONE	intron_variant	Hecw2	c.2833-45T>A
chr1	54263748	A	G	1840	55	0.927273	0	0,0,35,20	MODIFIER	NONE	intron_variant	Ccdc150	c.443-26A>G
chr1	54277621	A	G	3261	93	0.946237	0	0,0,77,16	MODIFIER	NONE	intron_variant	Ccdc150	c.691-33A>G
chr1	54278776	G	C	3036	84	0.988095	0	0,0,28,56	LOW	NONE	synonymous_variant	Ccdc150	c.873G>C
chr1	54281805	GTC	G	81	72	0.041667	2	23,43,0,3	MODIFIER	NONE	intron_variant	Ccdc150	c.981+33_981+34delTC
chr1	54281805	GTCTC	G	127	72	0.069444	1	23,43,1,4	MODIFIER	NONE	intron_variant	Ccdc150	c.981+33_981+36delTCTC
chr1	54300499	C	T	2493	68	1	0	0,0,18,50	MODIFIER	NONE	intron_variant	Ccdc150	c.1485+16C>T
chr1	54364990	T	C	2238	64	0.953125	0	0,0,35,29	MODIFIER	NONE	intron_variant	Ccdc150	c.2865+27T>C
chr1	54403697	A	C	3131	90	0.955556	0	0,0,21,69	MODIFIER	NONE	intron_variant	Gtf3c3	c.2249-62T>G
chr1	54434262	TTG	T	118	90	0.077778	1	42,56,2,5	MODIFIER	NONE	intron_variant	Gtf3c3	c.215-26_215-25delCA
chr1	54434263	TG	T	74	79	0.101266	5	31,52,1,7	MODIFIER	NONE	intron_variant	Gtf3c3	c.215-26delC
chr1	54512741	A	G	8902	257	0.941634	0	0,0,174,83	MODIFIER	NONE	intron_variant	Pgap1	c.1500+31T>C
chr1	54512898	T	C	3555	101	0.980198	0	0,0,6,95	MODIFIER	NONE	intron_variant	Pgap1	c.1427-53A>G
chr1	54530206	G	T	2250	64	0.984375	0	0,0,12,52	MODIFIER	NONE	intron_variant	Pgap1	c.1034-34C>A
chr1	54557551	A	G	4325	128	0.929688	0	0,0,54,74	LOW	NONE	synonymous_variant	Pgap1	c.30T>C
chr1	54566738	T	A	176	56	0.125	1	34,15,6,1	MODIFIER	NONE	intergenic_region	Pgap1-Ankrd44	n.54566738T>A
chr1	54566755	A	G	204	63	0.126984	6	35,20,7,1	MODIFIER	NONE	intergenic_region	Pgap1-Ankrd44	n.54566755A>G
chr1	54566779	T	C	336	78	0.166667	4	37,27,10,4	MODIFIER	NONE	intergenic_region	Pgap1-Ankrd44	n.54566779T>C
chr1	54566846	G	C	804	104	0.278846	0	41,34,15,14	MODIFIER	NONE	intergenic_region	Pgap1-Ankrd44	n.54566846G>C
chr1	54566852	T	G	728	104	0.25	0	39,37,14,14	MODIFIER	NONE	intergenic_region	Pgap1-Ankrd44	n.54566852T>G
chr1	54566879	G	A	495	103	0.184466	0	42,41,10,10	MODIFIER	NONE	intergenic_region	Pgap1-Ankrd44	n.54566879G>A
chr1	54566880	T	C	497	102	0.186275	0	41,41,10,10	MODIFIER	NONE	intergenic_region	Pgap1-Ankrd44	n.54566880T>C
chr1	54566890	C	A	417	95	0.178947	0	38,39,9,9	MODIFIER	NONE	intergenic_region	Pgap1-Ankrd44	n.54566890C>A
chr1	54566896	G	A	301	83	0.144578	1	33,37,5,8	MODIFIER	NONE	intergenic_region	Pgap1-Ankrd44	n.54566896G>A
chr1	54566918	A	G	133	71	0.084507	6	32,33,1,5	MODIFIER	NONE	intergenic_region	Pgap1-Ankrd44	n.54566918A>G
chr1	54651611	T	A	3344	102	0.921569	0	0,0,91,11	MODIFIER	NONE	intron_variant	Ankrd44	c.2923+58A>T
chr1	54653781	A	G	8651	247	0.947368	0	0,0,104,143	LOW	NONE	synonymous_variant	Ankrd44	c.2793T>C
chr1	54663949	A	T	8323	254	0.909449	0	0,0,96,158	LOW	NONE	synonymous_variant	Ankrd44	c.1962T>A
chr1	54664008	A	AT	714	88	0.488636	10	10,40,3,40	MODIFIER	NONE	intron_variant	Ankrd44	c.1925-23_1925-22insA
chr1	54722947	G	C	2618	79	0.924051	0	0,0,67,11	MODIFIER	NONE	intron_variant	Ankrd44	c.1650+67C>G
chr1	54729724	T	C	3586	103	0.951456	0	1,1,64,37	MODIFIER	NONE	intron_variant	Ankrd44	c.1457+10A>G
chr1	54736361	C	A	1446	54	0.759259	0	0,0,4,49	MODIFIER	NONE	intron_variant	Ankrd44	c.1101-49G>T
chr1	54766460	T	C	3691	102	0.990196	0	0,0,30,72	MODIFIER	NONE	intron_variant	Ankrd44	c.463-23A>G
chr1	54766844	A	G	9182	258	0.976744	0	0,0,128,130	LOW	NONE	synonymous_variant	Ankrd44	c.402T>C
chr1	54792422	G	A	1925	55	0.945455	0	0,0,34,21	MODIFIER	NONE	intron_variant	Ankrd44	c.190+31C>T
chr1	54828472	GTTT	G	1225	89	0.719101	0	19,0,64,0	MODIFIER	NONE	intron_variant	Ankrd44	c.111+137_111+139delAAA
chr1	54828621	T	C	20825	631	0.908082	0	0,0,298,333	LOW	NONE	synonymous_variant	Ankrd44	c.102A>G
chr1	54988158	GTAA	G	3189	96	0.84375	8	8,8,25,56	LOW	NONE	splice_region_variant&intron_variant	Sf3b1	c.3540-6_3540-4delTTA
chr1	54990569	A	G	7928	229	0.938865	0	0,0,92,137	LOW	NONE	synonymous_variant	Sf3b1	c.3273T>C
chr1	54990653	C	G	2895	90	0.911111	0	0,0,8,82	MODIFIER	NONE	intron_variant	Sf3b1	c.3267-78G>C
chr1	54994468	TA	T	949	70	0.657143	19	12,11,9,37	LOW	NONE	splice_region_variant&intron_variant	Sf3b1	c.3135-8delT
chr1	54996750	C	T	3454	126	0.761905	0	0,0,116,7	MODIFIER	NONE	intron_variant	Sf3b1	c.3013+67G>A
chr1	54998274	C	CAAAT	4342	151	0.801324	3	7,28,18,103	MODIFIER	NONE	intron_variant	Sf3b1	c.2497-16_2497-15insATTT
chr1	55000419	C	T	1995	54	0.981481	0	0,0,12,42	MODIFIER	NONE	intron_variant	Sf3b1	c.2078-32G>A
chr1	55014552	A	G	3290	98	0.938776	0	0,0,34,64	LOW	NONE	synonymous_variant	Sf3b1	c.426T>C
chr1	55016526	C	T	2048	74	0.783784	0	0,0,11,63	MODIFIER	NONE	intron_variant	Sf3b1	c.301-36G>A
chr1	55019411	GA	G	1411	61	0.836066	21	7,6,8,43	MODIFIER	NONE	intron_variant	Sf3b1	c.29-12delT
chr1	55027304	C	G	118	371	0.018868	1	183,181,3,4	MODIFIER	NONE	intron_variant	Sf3b1	c.28+35G>C
chr1	55061302	A	G	2001	57	0.947368	0	0,0,40,17	MODERATE	MODIFIER	NONE	NONE	missense_variant
chr1	55061320	G	A	1959	56	0.964286	0	0,0,38,18	LOW	MODIFIER	NONE	NONE	synonymous_variant
chr1	55061353	G	A	2312	64	0.96875	0	0,0,36,28	LOW	MODIFIER	NONE	NONE	synonymous_variant
chr1	55061359	T	C	2395	71	0.957747	0	0,0,38,33	LOW	MODIFIER	NONE	NONE	synonymous_variant
chr1	55066393	A	C	4200	118	0.966102	0	0,0,77,41	MODIFIER	MODIFIER	NONE	NONE	intron_variant
chr1	55066929	T	C	4266	121	0.958678	0	0,0,52,69	MODIFIER	MODIFIER	NONE	NONE	intron_variant
chr1	55078482	T	C	3092	87	0.965517	0	0,0,40,47	MODIFIER	NONE	intron_variant	Hspd1	c.1570-42A>G
chr1	55084793	G	A	2801	86	0.883721	0	0,0,40,46	LOW	MODIFIER	NONE	NONE	splice_region_variant&intron_variant
chr1	55089013	C	T	2310	63	0.984127	0	0,0,51,12	MODIFIER	MODIFIER	NONE	NONE	upstream_gene_variant
chr1	55089113	T	C	3116	97	0.917526	0	0,0,50,47	LOW	MODIFIER	NONE	NONE	synonymous_variant
chr1	55091220	A	G	3407	113	0.920354	0	0,0,34,79	MODIFIER	MODIFIER	NONE	NONE	3_prime_UTR_variant
chr1	55120087	G	C	3310	113	0.840708	10	3,3,87,19	MODIFIER	NONE	intergenic_region	Hspe1-Mob4	n.55120087G>C
chr1	55120103	T	C	3204	114	0.903509	10	3,3,88,20	MODIFIER	NONE	intergenic_region	Hspe1-Mob4	n.55120103T>C
chr1	55120105	TTTGC	T	3264	114	0.938596	8	4,3,87,20	MODIFIER	NONE	intergenic_region	Hspe1-Mob4	n.55120106_55120109delTTGC
chr1	55120114	TCC	T	3303	121	0.917355	13	5,5,89,22	MODIFIER	NONE	intergenic_region	Hspe1-Mob4	n.55120115_55120116delCC
chr1	55120163	C	T	8222	253	0.920949	1	3,2,172,76	MODIFIER	NONE	intergenic_region	Hspe1-Mob4	n.55120163C>T
chr1	55120189	C	A	10428	299	0.956522	0	0,0,182,116	MODIFIER	NONE	intergenic_region	Hspe1-Mob4	n.55120189C>A
chr1	55120215	T	G	12978	370	0.954054	0	0,0,214,156	MODIFIER	NONE	intergenic_region	Hspe1-Mob4	n.55120215T>G
chr1	55120390	G	A	8890	262	0.935115	0	0,0,127,135	MODIFIER	NONE	intergenic_region	Hspe1-Mob4	n.55120390G>A
chr1	55120512	A	C	8829	256	0.953125	0	0,0,125,131	MODIFIER	NONE	intergenic_region	Hspe1-Mob4	n.55120512A>C
chr1	55120702	G	T	131	237	0.029536	1	104,126,4,3	MODIFIER	NONE	intergenic_region	Hspe1-Mob4	n.55120702G>T
chr1	55120722	G	A	155	230	0.034783	1	95,127,4,4	MODIFIER	NONE	intergenic_region	Hspe1-Mob4	n.55120722G>A
chr1	55120808	A	G	3911	118	0.898305	0	0,0,38,80	MODIFIER	NONE	intergenic_region	Hspe1-Mob4	n.55120808A>G
chr1	55120849	C	A	2739	78	0.935897	0	0,0,26,52	MODIFIER	NONE	intergenic_region	Hspe1-Mob4	n.55120849C>A
chr1	55161068	T	A	1298	149	0.302013	5	48,55,17,29	MODIFIER	NONE	intergenic_region	Mob4-Rftn2	n.55161068T>A
chr1	55171789	C	T	4133	123	0.902439	5	0,1,91,31	MODIFIER	NONE	3_prime_UTR_variant	Rftn2	c.*21G>A
chr1	55171790	T	C	4275	127	0.92126	5	0,1,95,31	MODIFIER	NONE	3_prime_UTR_variant	Rftn2	c.*20A>G
chr1	55171885	A	G	7251	203	0.975369	0	0,0,95,108	LOW	NONE	synonymous_variant	Rftn2	c.1428T>C
chr1	55211125	A	G	1564	190	0.294737	2	101,29,44,16	MODIFIER	NONE	intron_variant	Rftn2	c.435+25T>C
chr1	55214137	C	T	3374	97	0.938144	0	0,0,58,39	LOW	NONE	synonymous_variant	Rftn2	c.306G>A
chr1	55237752	G	C	3885	115	0.93913	0	0,0,52,63	LOW	NONE	synonymous_variant	Mars2	c.513G>C
chr1	55335393	T	C	5185	152	0.940789	0	0,0,110,42	MODIFIER	MODIFIER	NONE	NONE	intron_variant
chr1	55335444	C	T	7943	223	0.977578	0	0,0,147,76	MODIFIER	MODIFIER	NONE	NONE	intron_variant
chr1	55335713	A	C	9620	288	0.927083	0	0,0,142,146	MODIFIER	MODIFIER	NONE	NONE	intron_variant
chr1	55346464	GA	G	1244	58	0.844828	0	1,9,6,43	MODIFIER	MODIFIER	NONE	NONE	intron_variant
chr1	55363173	T	C	1960	54	0.981481	0	0,0,49,5	MODIFIER	MODIFIER	NONE	NONE	upstream_gene_variant
chr1	55363276	T	G	8594	252	0.928571	0	0,0,143,109	MODIFIER	MODIFIER	NONE	NONE	upstream_gene_variant
chr1	56636182	C	T	3177	85	1	0	0,0,68,17	MODIFIER	NONE	3_prime_UTR_variant	Hsfy2	c.*16G>A
chr1	56636750	A	T	2941	81	0.987654	0	0,0,42,39	LOW	NONE	synonymous_variant	Hsfy2	c.627T>A
chr1	57292159	G	A	2624	73	0.958904	0	0,0,38,35	MODIFIER	NONE	intergenic_region	BC055402-4930558J18Rik	n.57292159G>A
chr1	57383151	C	G	17161	500	0.954	0	0,0,196,304	MODERATE	NONE	missense_variant	1700066M21Rik	c.685C>G
chr1	57406448	C	T	6741	206	0.898058	0	0,0,85,121	MODERATE	MODERATE	MODIFIER	MODIFIER	MODIFIER
chr1	57406489	G	A	4537	132	0.939394	0	0,0,44,88	MODIFIER	MODIFIER	MODIFIER	MODIFIER	MODIFIER
chr1	57406643	A	G	7712	227	0.92511	3	0,1,135,91	MODIFIER	MODIFIER	MODIFIER	MODIFIER	MODIFIER
chr1	58001322	AT	A	140	195	0.066667	3	37,147,1,12	MODIFIER	MODIFIER	NONE	NONE	intron_variant
chr1	58041392	C	G	2064	59	0.966102	0	0,0,41,18	MODIFIER	NONE	intron_variant	Aox1	c.43-44C>G
chr1	58049383	C	T	6950	194	0.963918	0	0,0,65,129	LOW	NONE	synonymous_variant	Aox1	c.327C>T
chr1	58049455	G	A	697	72	0.333333	0	4,43,2,23	LOW	NONE	synonymous_variant	Aox1	c.399G>A
chr1	58053609	C	T	3860	109	0.972477	0	0,0,70,39	MODIFIER	NONE	intron_variant	Aox1	c.434-55C>T
chr1	58053625	A	G	4543	127	0.968504	0	0,0,71,56	MODIFIER	NONE	intron_variant	Aox1	c.434-39A>G
chr1	58053742	A	G	2089	59	0.983051	0	0,0,12,47	MODIFIER	NONE	intron_variant	Aox1	c.495+17A>G
chr1	58057402	T	C	1773	53	0.943396	0	0,0,31,22	MODIFIER	NONE	intron_variant	Aox1	c.667-12T>C
chr1	58058055	C	T	2324	67	0.970149	0	0,0,57,10	MODIFIER	NONE	intron_variant	Aox1	c.812-77C>T
chr1	58059185	CTGTA	C	2403	74	0.824324	23	1,12,31,30	HIGH	NONE	frameshift_variant&splice_donor_variant&splice_region_variant&intron_variant	Aox1	c.1056_1056+3delTGTA
chr1	58063549	TC	T	2103	60	0.95	0	1,5,16,41	MODIFIER	NONE	intron_variant	Aox1	c.1608+16delC
chr1	58068732	G	A	4925	147	0.92517	0	0,0,100,47	LOW	NONE	splice_region_variant&synonymous_variant	Aox1	c.1872G>A
chr1	58081520	C	G	5932	171	0.94152	0	0,0,86,85	MODERATE	NONE	missense_variant	Aox1	c.2571C>G
chr1	58085460	C	T	1914	51	1	0	0,0,36,15	LOW	NONE	synonymous_variant	Aox1	c.2859C>T
chr1	58092447	A	G	2444	74	0.945946	0	0,0,61,13	MODIFIER	NONE	intron_variant	Aox1	c.3061-47A>G
chr1	58092461	A	C	2956	86	0.953488	0	0,0,70,16	MODIFIER	NONE	intron_variant	Aox1	c.3061-33A>C
chr1	58092598	A	G	2595	73	0.972603	0	0,0,17,56	MODIFIER	NONE	intron_variant	Aox1	c.3156+9A>G
chr1	58113164	A	G	1867	53	0.981132	0	0,0,49,4	MODIFIER	NONE	5_prime_UTR_variant	Aox3	c.-95A>G
chr1	58113216	A	G	3931	113	0.955752	0	0,0,79,34	MODIFIER	NONE	5_prime_UTR_variant	Aox3	c.-43A>G
chr1	58113227	T	C	4539	126	0.97619	0	0,0,83,43	LOW	MODIFIER	NONE	NONE	5_prime_UTR_premature_start_codon_gain_variant
chr1	58113242	A	G	4968	141	0.964539	0	0,0,78,63	MODIFIER	NONE	5_prime_UTR_variant	Aox3	c.-17A>G
chr1	58114852	G	A	3892	113	0.929204	3	0,1,60,52	MODIFIER	NONE	intron_variant	Aox3	c.55-19G>A
chr1	58119505	G	A	6619	183	0.972678	0	0,0,109,74	LOW	NONE	synonymous_variant	Aox3	c.234G>A
chr1	58138347	T	C	1752	51	0.941176	0	0,0,6,45	MODIFIER	NONE	intron_variant	Aox3	c.669+51T>C
chr1	58141473	T	C	10199	291	0.955326	0	0,0,151,140	LOW	NONE	synonymous_variant	Aox3	c.792T>C
chr1	58146440	A	G	14812	429	0.944056	0	1,1,215,212	LOW	NONE	synonymous_variant	Aox3	c.924A>G
chr1	58146654	G	A	1763	51	0.941176	0	0,0,3,48	MODIFIER	NONE	intron_variant	Aox3	c.1059+79G>A
chr1	58152540	G	A	2631	76	0.947368	0	0,0,60,16	MODIFIER	NONE	intron_variant	Aox3	c.1264-14G>A
chr1	58153490	A	G	13168	375	0.96	0	0,0,223,152	MODERATE	NONE	missense_variant	Aox3	c.1622A>G
chr1	58153602	A	T	5651	166	0.945783	0	0,0,21,145	MODIFIER	NONE	intron_variant	Aox3	c.1704+30A>T
chr1	58153604	C	T	5695	160	0.96875	0	0,0,19,141	MODIFIER	NONE	intron_variant	Aox3	c.1704+32C>T
chr1	58158908	T	C	3621	101	0.990099	0	0,0,70,31	LOW	NONE	synonymous_variant	Aox3	c.1878T>C
chr1	58171999	G	A	1821	54	0.962963	0	0,0,12,42	MODIFIER	NONE	intron_variant	Aox3	c.2835+66G>A
chr1	58183595	T	C	1932	55	0.981818	0	0,0,8,47	MODIFIER	NONE	intron_variant	Aox3	c.3531+15T>C
chr1	58188328	A	G	3568	108	0.898148	0	0,0,83,25	LOW	NONE	splice_region_variant&intron_variant	Aox3	c.3598-7A>G
chr1	58210499	A	C	3118	90	0.944444	0	0,0,75,15	LOW	MODIFIER	NONE	NONE	5_prime_UTR_premature_start_codon_gain_variant
chr1	58210562	C	T	7123	206	0.936893	0	0,0,121,85	MODIFIER	NONE	5_prime_UTR_variant	Aox4	c.-13C>T
chr1	58210677	A	C	770	97	0.278351	5	16,53,3,25	MODIFIER	NONE	intron_variant	Aox4	c.54+49A>C
chr1	58212914	C	A	2229	62	0.967742	0	0,0,59,3	MODIFIER	NONE	intron_variant	Aox4	c.55-108C>A
chr1	58213131	G	A	2237	63	0.984127	0	0,0,4,59	MODIFIER	NONE	intron_variant	Aox4	c.112+52G>A
chr1	58233791	A	G	3664	103	0.970874	0	0,0,69,34	MODIFIER	NONE	intron_variant	Aox4	c.911-47A>G
chr1	58235077	T	C	2585	72	0.986111	0	0,0,58,14	MODIFIER	NONE	intron_variant	Aox4	c.1063-42T>C
chr1	58235194	A	C	3806	113	0.920354	0	0,0,35,78	MODERATE	NONE	missense_variant	Aox4	c.1138A>C
chr1	58236619	G	T	1891	53	0.962264	0	0,0,46,7	MODIFIER	NONE	intron_variant	Aox4	c.1157-48G>T
chr1	58236647	G	C	2726	82	0.926829	0	0,0,55,27	MODIFIER	NONE	intron_variant	Aox4	c.1157-20G>C
chr1	58239361	A	T	2249	63	0.968254	0	0,0,6,57	MODIFIER	NONE	intron_variant	Aox4	c.1454+60A>T
chr1	58240708	C	A	1747	50	0.96	0	0,0,38,12	MODERATE	NONE	missense_variant	Aox4	c.1482C>A
chr1	58240867	G	C	2433	70	0.971429	0	0,0,15,55	MODIFIER	NONE	intron_variant	Aox4	c.1617+24G>C
chr1	58245032	T	C	3897	106	0.990566	0	0,0,87,19	MODIFIER	NONE	intron_variant	Aox4	c.1618-28T>C
chr1	58245035	G	A	4160	116	0.982759	0	0,0,93,23	MODIFIER	NONE	intron_variant	Aox4	c.1618-25G>A
chr1	58245164	T	C	5491	160	0.9625	0	0,0,42,118	MODIFIER	NONE	intron_variant	Aox4	c.1710+12T>C
chr1	58245168	T	A	5409	152	0.973684	0	0,0,38,114	MODIFIER	NONE	intron_variant	Aox4	c.1710+16T>A
chr1	58245172	G	A	5468	148	0.993243	0	0,0,35,113	MODIFIER	NONE	intron_variant	Aox4	c.1710+20G>A
chr1	58245778	C	T	2051	55	1	0	0,0,47,8	MODIFIER	NONE	intron_variant	Aox4	c.1711-23C>T
chr1	58245795	T	A	2375	67	0.985075	0	0,0,54,13	LOW	NONE	splice_region_variant&intron_variant	Aox4	c.1711-6T>A
chr1	58245842	C	T	3282	95	0.957895	0	0,0,61,34	LOW	NONE	synonymous_variant	Aox4	c.1752C>T
chr1	58245935	C	T	4128	114	0.973684	0	0,0,53,61	LOW	NONE	synonymous_variant	Aox4	c.1845C>T
chr1	58246272	A	G	3390	96	0.96875	0	0,0,49,46	LOW	NONE	synonymous_variant	Aox4	c.1914A>G
chr1	58247376	A	T	3877	107	0.990654	0	0,0,28,79	MODIFIER	NONE	intron_variant	Aox4	c.2118+48A>T
chr1	58250275	G	T	3587	106	0.943396	0	0,0,34,72	MODIFIER	NONE	intron_variant	Aox4	c.2340+16G>T
chr1	58250324	G	A	1943	57	0.964912	0	0,1,15,41	MODIFIER	NONE	intron_variant	Aox4	c.2340+65G>A
chr1	58250327	G	A	1938	55	0.981818	0	0,0,14,41	MODIFIER	NONE	intron_variant	Aox4	c.2340+68G>A
chr1	58252213	T	G	5542	161	0.937888	0	0,0,71,90	MODIFIER	NONE	intron_variant	Aox4	c.2474+15T>G
chr1	58254013	T	A	3683	103	0.970874	0	0,0,32,71	MODIFIER	NONE	intron_variant	Aox4	c.2649+18T>A
chr1	58254014	T	G	3528	101	0.940594	0	0,0,31,70	MODIFIER	NONE	intron_variant	Aox4	c.2649+19T>G
chr1	58254187	G	A	2194	61	0.983607	0	0,0,31,30	LOW	NONE	synonymous_variant	Aox4	c.2697G>A
chr1	58262533	C	T	3956	110	0.972727	0	0,0,81,29	MODIFIER	NONE	intron_variant	Aox4	c.3295-32C>T
chr1	58262669	G	A	2154	63	0.968254	0	0,0,8,55	MODIFIER	NONE	intron_variant	Aox4	c.3369+30G>A
chr1	58263372	C	T	4575	149	0.852349	0	0,0,75,74	LOW	NONE	synonymous_variant	Aox4	c.3399C>T
chr1	58263404	GT	G	807	100	0.48	20	29,24,13,35	MODIFIER	NONE	intron_variant	Aox4	c.3422+10delT
chr1	58263885	A	G	2302	64	0.96875	0	0,0,33,31	LOW	NONE	synonymous_variant	Aox4	c.3474A>G
chr1	58264272	TC	T	1400	53	0.924528	13	2,2,46,3	MODIFIER	NONE	intron_variant	Aox4	c.3538-69delC
chr1	58264275	T	TAATAA	1390	54	0.87037	16	4,3,44,3	MODIFIER	NONE	intron_variant	Aox4	c.3538-67_3538-66insAATAA
chr1	58264414	A	G	3322	97	0.948454	0	0,0,21,76	LOW	NONE	splice_region_variant&intron_variant	Aox4	c.3603+7A>G
chr1	58264417	G	T	3322	95	0.957895	0	0,1,21,73	MODIFIER	NONE	intron_variant	Aox4	c.3603+10G>T
chr1	58264917	G	A	2926	82	0.963415	0	0,0,61,21	MODIFIER	NONE	intron_variant	Aox4	c.3604-42G>A
chr1	58265070	A	G	4938	145	0.931035	0	0,0,79,66	MODERATE	NONE	missense_variant	Aox4	c.3715A>G
chr1	58265096	T	C	6135	172	0.965116	0	0,0,86,86	LOW	NONE	synonymous_variant	Aox4	c.3741T>C
chr1	58265187	G	A	3044	90	0.955556	0	0,0,19,71	MODIFIER	NONE	intron_variant	Aox4	c.3789+43G>A
chr1	58265205	A	G	2106	61	0.983607	0	0,0,11,50	MODIFIER	NONE	intron_variant	Aox4	c.3789+61A>G
chr1	58267713	T	TG	1494	50	0.94	3	2,1,39,8	MODIFIER	NONE	intron_variant	Aox4	c.3958-47_3958-46insG
chr1	58267727	T	G	1893	61	0.918033	0	0,0,47,14	MODIFIER	NONE	intron_variant	Aox4	c.3958-33T>G
chr1	58267849	G	T	2499	72	0.944444	0	0,0,17,55	MODIFIER	NONE	3_prime_UTR_variant	Aox4	c.*36G>T
chr1	58281172	T	C	6991	199	0.959799	3	0,1,104,94	LOW	NONE	splice_region_variant&intron_variant	Aox2	c.58-5T>C
chr1	58281182	G	T	7322	210	0.942857	0	0,0,106,104	LOW	NONE	synonymous_variant	Aox2	c.63G>T
chr1	58281270	G	C	3945	113	0.955752	0	0,0,28,85	MODIFIER	NONE	intron_variant	Aox2	c.115+36G>C
chr1	58285645	G	A	1709	52	0.942308	0	0,0,14,38	LOW	NONE	synonymous_variant	Aox2	c.396G>A
chr1	58289856	C	T	2802	77	0.974026	0	0,0,64,13	MODIFIER	NONE	intron_variant	Aox2	c.511-52C>T
chr1	58289857	C	T	2876	81	0.975309	0	0,0,67,14	MODIFIER	NONE	intron_variant	Aox2	c.511-51C>T
chr1	58290040	C	G	2633	76	0.934211	0	0,0,7,69	MODIFIER	NONE	intron_variant	Aox2	c.594+49C>G
chr1	58290055	A	G	2037	61	0.901639	0	0,0,2,59	MODIFIER	NONE	intron_variant	Aox2	c.594+64A>G
chr1	58292207	A	G	11353	335	0.928358	0	0,0,195,140	MODERATE	NONE	missense_variant	Aox2	c.604A>G
chr1	58292320	A	G	4039	119	0.941176	0	0,1,6,112	MODIFIER	NONE	intron_variant	Aox2	c.675+42A>G
chr1	58299753	G	C	3927	112	0.973214	0	0,0,71,41	MODIFIER	NONE	intron_variant	Aox2	c.914-10G>C
chr1	58299885	T	C	6001	170	0.958824	0	0,0,100,70	LOW	NONE	synonymous_variant	Aox2	c.1036T>C
chr1	58299926	G	GCTGTTATTCT	3783	149	0.697987	1	25,19,55,49	MODIFIER	NONE	intron_variant	Aox2	c.1065+12_1065+13insCTGTTATTCT
chr1	58299976	G	A	3156	94	0.93617	0	0,0,9,85	MODIFIER	NONE	intron_variant	Aox2	c.1065+62G>A
chr1	58299982	A	G	2918	85	0.929412	0	0,0,4,81	MODIFIER	NONE	intron_variant	Aox2	c.1065+68A>G
chr1	58300001	T	C	2262	67	0.925373	15	1,0,1,65	MODIFIER	NONE	intron_variant	Aox2	c.1065+87T>C
chr1	58300004	G	A	2408	65	1	0	0,0,1,64	MODIFIER	NONE	intron_variant	Aox2	c.1065+90G>A
chr1	58300552	G	A	6136	179	0.960894	0	0,0,142,37	MODIFIER	NONE	intron_variant	Aox2	c.1066-63G>A
chr1	58300720	T	TCCAGGCAGC	3055	187	0.459893	41	31,73,6,80	MODIFIER	NONE	intron_variant	Aox2	c.1159+12_1159+13insCCAGGCAGC
chr1	58300726	T	A	3376	94	0.968085	0	0,0,6,88	MODIFIER	NONE	intron_variant	Aox2	c.1159+18T>A
chr1	58300736	G	GT	2767	100	0.84	35	5,11,1,83	MODIFIER	NONE	intron_variant	Aox2	c.1159+28_1159+29insT
chr1	58424134	G	A	2866	85	0.929412	0	0,0,17,68	MODIFIER	MODIFIER	MODIFIER	MODIFIER	NONE
chr1	58557235	G	A	3559	105	0.933333	0	0,0,83,22	MODIFIER	MODIFIER	MODIFIER	NONE	NONE
chr1	58613984	C	T	304	63	0.190476	0	26,25,6,6	MODIFIER	NONE	intergenic_region	Ndufb3-Gm20257	n.58613984C>T
chr1	58646608	G	A	225	50	0.24	0	35,1,14,0	MODIFIER	NONE	intergenic_region	Ndufb3-Gm20257	n.58646608G>A
chr1	58646634	C	G	338	54	0.277778	5	30,9,14,1	MODIFIER	NONE	intergenic_region	Ndufb3-Gm20257	n.58646634C>G
chr1	58646648	G	T	314	55	0.254545	7	27,12,14,2	MODIFIER	NONE	intergenic_region	Ndufb3-Gm20257	n.58646648G>T
chr1	58646916	C	T	528	90	0.344444	0	55,3,31,1	MODIFIER	NONE	intergenic_region	Ndufb3-Gm20257	n.58646916C>T
chr1	58646998	C	T	192	322	0.062112	1	262,38,19,3	MODIFIER	NONE	intergenic_region	Ndufb3-Gm20257	n.58646998C>T
chr1	58647007	A	C	1088	358	0.203911	12	219,66,64,9	MODIFIER	NONE	intergenic_region	Ndufb3-Gm20257	n.58647007A>C
chr1	58647050	C	T	991	524	0.135496	31	229,220,22,53	MODIFIER	NONE	intergenic_region	Ndufb3-Gm20257	n.58647050C>T
chr1	58647053	C	T	1222	540	0.157407	27	226,224,29,61	MODIFIER	NONE	intergenic_region	Ndufb3-Gm20257	n.58647053C>T
chr1	58647068	C	T	1266	592	0.146959	35	229,274,22,67	MODIFIER	NONE	intergenic_region	Ndufb3-Gm20257	n.58647068C>T
chr1	58647071	C	T	6147	598	0.483278	24	137149112199	MODIFIER	NONE	intergenic_region	Ndufb3-Gm20257	n.58647071C>T
chr1	58647077	G	A	1513	597	0.165829	38	216,279,24,78	MODIFIER	NONE	intergenic_region	Ndufb3-Gm20257	n.58647077G>A
chr1	58647092	G	A	1749	625	0.1792	19	207,300,33,84	MODIFIER	NONE	intergenic_region	Ndufb3-Gm20257	n.58647092G>A
chr1	58647096	A	G	185	607	0.036244	1	227,356,8,16	MODIFIER	NONE	intergenic_region	Ndufb3-Gm20257	n.58647096A>G
chr1	58647111	T	C	199	541	0.040665	7	202,317,5,17	MODIFIER	NONE	intergenic_region	Ndufb3-Gm20257	n.58647111T>C
chr1	58647118	A	G	216	511	0.04501	3	188,298,7,18	MODIFIER	NONE	intergenic_region	Ndufb3-Gm20257	n.58647118A>G
chr1	58647129	G	A	289	449	0.060134	1	169,251,10,19	MODIFIER	NONE	intergenic_region	Ndufb3-Gm20257	n.58647129G>A
chr1	58647131	C	T	1537	446	0.210762	5	138,207,34,67	MODIFIER	NONE	intergenic_region	Ndufb3-Gm20257	n.58647131C>T
chr1	58647132	G	T	126	437	0.034325	2	168,253,5,11	MODIFIER	NONE	intergenic_region	Ndufb3-Gm20257	n.58647132G>T
chr1	58647144	G	C	826	372	0.153226	6	121,193,17,41	MODIFIER	NONE	intergenic_region	Ndufb3-Gm20257	n.58647144G>C
chr1	58647148	A	C	250	354	0.064972	4	121,207,7,19	MODIFIER	NONE	intergenic_region	Ndufb3-Gm20257	n.58647148A>C
chr1	58647158	C	T	372	296	0.097973	0	89,175,10,22	MODIFIER	NONE	intergenic_region	Ndufb3-Gm20257	n.58647158C>T
chr1	58647164	G	C	140	263	0.053232	1	80,167,4,12	MODIFIER	NONE	intergenic_region	Ndufb3-Gm20257	n.58647164G>C
chr1	58647165	T	C	441	266	0.12406	4	76,156,8,26	MODIFIER	NONE	intergenic_region	Ndufb3-Gm20257	n.58647165T>C
chr1	58647172	A	T	128	249	0.052209	6	72,163,2,12	MODIFIER	NONE	intergenic_region	Ndufb3-Gm20257	n.58647172A>T
chr1	58647181	T	C	146	216	0.064815	16	54,148,0,14	MODIFIER	NONE	intergenic_region	Ndufb3-Gm20257	n.58647181T>C
chr1	58647221	T	C	95	173	0.052023	9	42,121,0,10	MODIFIER	NONE	intergenic_region	Ndufb3-Gm20257	n.58647221T>C
chr1	58824218	T	C	2254	67	0.925373	0	0,0,26,41	LOW	LOW	LOW	NONE	NONE
chr1	58824229	C	T	2285	64	0.96875	0	0,0,23,41	MODERATE	MODERATE	MODERATE	NONE	NONE
chr1	58829109	C	T	2495	72	0.930556	0	0,0,29,43	LOW	LOW	LOW	NONE	NONE
chr1	58831586	G	A	5170	148	0.945946	0	0,0,101,47	MODIFIER	MODIFIER	MODIFIER	NONE	NONE
chr1	58844484	C	T	5622	156	0.980769	0	0,0,70,86	LOW	LOW	LOW	NONE	NONE
chr1	58850863	C	T	2326	75	0.906667	0	0,0,41,34	MODIFIER	MODIFIER	MODIFIER	MODIFIER	NONE
chr1	58876324	G	A	1642	50	0.96	0	0,0,34,16	MODIFIER	NONE	intergenic_region	Casp8-Trak2	n.58876324G>A
chr1	58903699	A	G	4596	147	0.884354	0	0,0,69,78	LOW	NONE	synonymous_variant	Trak2	c.2547T>C
chr1	58903728	G	A	4371	142	0.84507	0	0,0,59,83	LOW	NONE	synonymous_variant	Trak2	c.2518C>T
chr1	58903852	G	A	1479	175	0.297143	2	70,48,37,20	LOW	NONE	synonymous_variant	Trak2	c.2394C>T
chr1	58908427	G	A	2839	81	0.962963	0	0,0,73,8	MODIFIER	NONE	intron_variant	Trak2	c.1957+96C>T
chr1	58908446	A	G	3812	114	0.947368	0	0,0,91,23	MODIFIER	NONE	intron_variant	Trak2	c.1957+77T>C
chr1	58908566	T	C	6997	204	0.955882	0	0,0,80,124	LOW	NONE	synonymous_variant	Trak2	c.1914A>G
chr1	58910004	T	C	4591	136	0.926471	0	0,0,84,52	MODERATE	NONE	missense_variant	Trak2	c.1636A>G
chr1	58910240	T	C	1675	51	0.901961	0	0,0,16,34	MODERATE	NONE	missense_variant	Trak2	c.1400A>G
chr1	58910242	C	T	1741	50	0.96	0	0,0,16,34	LOW	NONE	synonymous_variant	Trak2	c.1398G>A
chr1	58912140	T	C	4272	120	0.975	0	0,0,93,27	MODIFIER	NONE	intron_variant	Trak2	c.1190+46A>G
chr1	58915846	G	A	4198	116	0.982759	0	0,0,44,72	MODIFIER	NONE	intron_variant	Trak2	c.976-23C>T
chr1	58915877	T	C	2191	66	0.893939	0	0,0,18,48	MODIFIER	NONE	intron_variant	Trak2	c.976-54A>G
chr1	58923452	C	T	4392	123	0.97561	0	0,0,93,30	MODIFIER	NONE	intron_variant	Trak2	c.480+70G>A
chr1	58993548	C	T	3078	95	0.947368	0	0,0,54,41	MODIFIER	NONE	intron_variant	Stradb	c.1071-13C>T
chr1	58994267	G	T	5133	142	0.971831	0	0,0,101,41	MODIFIER	NONE	intron_variant	Stradb	c.1114-26G>T
chr1	58994269	C	T	5323	146	0.993151	0	0,0,103,43	MODIFIER	NONE	intron_variant	Stradb	c.1114-24C>T
chr1	58997581	G	A	2894	85	0.917647	0	0,0,18,67	MODIFIER	MODIFIER	NONE	NONE	downstream_gene_variant
chr1	59058708	T	C	3671	109	0.917431	0	0,0,45,63	MODERATE	NONE	missense_variant	Als2cr11	c.1221A>G
chr1	59076759	C	T	6364	179	0.977654	0	0,0,44,135	MODIFIER	NONE	intron_variant	Als2cr11	c.451-37G>A
chr1	59094484	T	C	4878	137	0.985401	0	0,0,77,60	MODIFIER	NONE	intron_variant	Als2cr11	c.363+14A>G
chr1	59094608	G	C	3325	103	0.893204	0	0,0,39,64	MODERATE	NONE	missense_variant	Als2cr11	c.253C>G
chr1	59105512	T	G	1993	56	0.946429	0	0,0,50,6	MODIFIER	MODIFIER	NONE	NONE	intron_variant
chr1	59105514	G	A	2105	59	0.966102	0	0,0,52,7	MODIFIER	MODIFIER	NONE	NONE	intron_variant
chr1	59105640	G	A	6635	191	0.947644	0	0,0,106,85	LOW	LOW	NONE	NONE	synonymous_variant
chr1	59106496	C	T	2349	69	0.971014	0	0,0,52,17	MODIFIER	MODIFIER	NONE	NONE	intron_variant
chr1	59108596	A	G	1837	52	0.961538	0	0,0,44,8	MODIFIER	MODIFIER	NONE	NONE	intron_variant
chr1	59108651	C	T	3908	109	0.963303	0	0,0,65,44	MODIFIER	MODIFIER	NONE	NONE	intron_variant
chr1	59120234	A	C	2441	74	0.918919	0	0,0,49,25	MODIFIER	MODIFIER	MODIFIER	MODIFIER	MODIFIER
chr1	59124563	CACAGCACGGCTAACGTT	C	2737	81	0.814815	4	15,0,58,8	MODIFIER	MODIFIER	MODIFIER	MODIFIER	NONE
chr1	59125473	T	TGGCTAATGCATAAAAA	1398	48	0.875	0	16,2,38,4	MODIFIER	MODIFIER	NONE	NONE	intron_variant
chr1	59125491	A	C	1187	155	0.296774	0	77,30,36,12	MODIFIER	MODIFIER	NONE	NONE	intron_variant
chr1	59125604	A	G	5877	167	0.97006	0	0,0,52,115	MODERATE	MODERATE	NONE	NONE	missense_variant
chr1	59128928	G	A	2394	66	0.984848	0	0,0,43,23	LOW	LOW	NONE	NONE	splice_region_variant&intron_variant
chr1	59129008	A	C	2127	60	0.966667	0	0,0,17,43	LOW	LOW	NONE	NONE	synonymous_variant
chr1	59136824	A	AT	1975	67	0.910448	0	4,2,35,26	MODIFIER	MODIFIER	NONE	NONE	intron_variant
chr1	59146397	G	A	3587	105	0.92381	0	0,0,33,71	MODERATE	MODERATE	NONE	NONE	missense_variant
chr1	59152925	G	GATTTCT	481	101	0.148515	3	15,73,1,14	MODIFIER	MODIFIER	NONE	NONE	intron_variant
chr1	59167141	G	GGAAGGAAA	310	63	0.190476	15	34,17,12,0	MODIFIER	MODIFIER	MODIFIER	NONE	NONE
chr1	59167141	G	A	1030	63	0.650794	28	18,0,28,17	MODIFIER	MODIFIER	MODIFIER	NONE	NONE
chr1	59169968	T	C	2569	77	0.922078	0	0,0,8,69	LOW	LOW	NONE	NONE	synonymous_variant
chr1	59170370	T	C	6456	184	0.945652	0	0,0,124,59	MODIFIER	MODIFIER	NONE	NONE	intron_variant
chr1	59170467	G	A	6643	194	0.963918	0	0,0,69,125	MODERATE	MODERATE	NONE	NONE	missense_variant
chr1	59170472	T	C	6113	185	0.935135	0	0,1,62,121	LOW	LOW	NONE	NONE	synonymous_variant
chr1	59178631	C	T	18719	539	0.944341	0	1,1,292,244	MODERATE	MODERATE	NONE	NONE	missense_variant
chr1	59178723	T	C	10245	288	0.96875	0	0,0,65,223	MODIFIER	MODIFIER	NONE	NONE	intron_variant
chr1	59180769	C	T	1885	57	0.912281	0	0,0,1,55	MODIFIER	MODIFIER	NONE	NONE	intron_variant
chr1	59185121	T	G	5514	156	0.961538	0	1,0,145,10	MODIFIER	MODIFIER	NONE	NONE	intron_variant
chr1	59185579	G	A	2845	80	0.9875	0	0,0,33,47	LOW	LOW	NONE	NONE	synonymous_variant
chr1	59185958	T	TTTC	3176	90	0.955556	16	1,3,71,15	MODIFIER	MODIFIER	NONE	NONE	intron_variant
chr1	59186449	C	A	2056	60	0.95	0	0,0,35,25	LOW	LOW	NONE	NONE	splice_region_variant&intron_variant
chr1	59186476	A	T	2322	64	0.96875	0	0,0,35,29	LOW	LOW	NONE	NONE	synonymous_variant
chr1	59187665	A	C	2183	62	0.967742	0	0,0,46,16	MODIFIER	MODIFIER	MODIFIER	NONE	NONE
chr1	59194107	GA	G	4889	194	0.876289	24	13,13,37,133	MODIFIER	MODIFIER	MODIFIER	NONE	NONE
chr1	59194143	G	A	4105	115	0.991304	0	0,0,14,101	MODIFIER	MODIFIER	MODIFIER	NONE	NONE
chr1	59196174	A	G	1699	50	0.92	0	0,0,35,15	MODIFIER	MODIFIER	MODIFIER	NONE	NONE
chr1	59196256	G	A	2888	81	0.962963	0	0,0,50,31	LOW	LOW	LOW	NONE	NONE
chr1	59196386	T	TAAC	1723	51	0.862745	0	2,6,10,34	MODIFIER	MODIFIER	MODIFIER	NONE	NONE
chr1	59211178	A	G	8171	238	0.941176	0	0,0,138,100	MODERATE	MODERATE	MODERATE	NONE	NONE
chr1	59211183	C	T	8470	244	0.954918	0	1,0,141,102	LOW	LOW	LOW	NONE	NONE
chr1	59215245	C	T	4909	145	0.924138	0	0,0,83,62	MODERATE	MODERATE	MODERATE	NONE	NONE
chr1	59215594	G	T	2602	76	0.934211	0	0,0,43,33	LOW	LOW	LOW	NONE	NONE
chr1	59217908	G	C	4519	128	0.976562	0	0,0,76,52	MODIFIER	MODIFIER	MODIFIER	NONE	NONE
chr1	59217921	T	C	4769	134	0.985075	0	0,0,71,63	LOW	LOW	LOW	NONE	NONE
chr1	59257820	C	CAGATCTAAA	2088	77	0.792208	4	12,4,38,23	MODERATE	NONE	disruptive_inframe_insertion	Cdk15	c.134_135insTCTAAAAGA
chr1	59257932	G	A	1834	52	0.980769	0	0,0,11,41	LOW	NONE	synonymous_variant	Cdk15	c.243G>A
chr1	59265495	GTT	G	1426	57	0.982456	0	1,0,55,1	MODIFIER	NONE	intron_variant	Cdk15	c.363-108_363-107delTT
chr1	59280544	T	C	2083	62	0.919355	0	1,0,49,12	MODIFIER	NONE	intron_variant	Cdk15	c.443-25T>C
chr1	59280570	A	G	3142	91	0.934066	0	0,0,66,25	LOW	NONE	splice_region_variant&synonymous_variant	Cdk15	c.444A>G
chr1	59280594	T	C	3828	112	0.946429	0	0,0,65,47	LOW	NONE	synonymous_variant	Cdk15	c.468T>C
chr1	59281382	T	C	6518	185	0.972973	0	0,0,118,66	MODIFIER	NONE	intron_variant	Cdk15	c.538-27T>C
chr1	59281385	T	G	1318	190	0.252632	0	86,53,32,19	MODIFIER	NONE	intron_variant	Cdk15	c.538-24T>G
chr1	59310865	G	A	4832	142	0.957747	0	0,0,46,96	LOW	NONE	splice_region_variant&intron_variant	Cdk15	c.1003+6G>A
chr1	59326648	G	A	4226	118	0.966102	0	0,0,75,43	MODIFIER	NONE	intron_variant	Cdk15	c.1004-23G>A
chr1	59330764	G	A	2982	88	0.920455	0	0,0,64,24	MODIFIER	NONE	intron_variant	Cdk15	c.1053-95G>A
chr1	59330794	C	T	4421	132	0.924242	0	0,0,91,41	MODIFIER	NONE	intron_variant	Cdk15	c.1053-65C>T
chr1	59330819	C	T	6220	179	0.944134	0	0,0,110,69	MODIFIER	NONE	intron_variant	Cdk15	c.1053-40C>T
chr1	59344330	C	T	2902	82	0.951219	0	0,0,30,52	LOW	NONE	synonymous_variant	Cdk15	c.1275C>T
chr1	59483868	A	G	4165	117	0.974359	0	0,0,47,70	LOW	NONE	synonymous_variant	Fzd7	c.909A>G
chr1	59815329	G	A	2694	77	0.974026	0	0,0,43,34	LOW	NONE	synonymous_variant	Bmpr2	c.336G>A
chr1	59841492	G	A	5390	151	0.966887	0	0,0,70,81	LOW	NONE	synonymous_variant	Bmpr2	c.480G>A
chr1	59841554	A	G	2706	88	0.829545	0	0,0,9,78	MODIFIER	NONE	intron_variant	Bmpr2	c.529+13A>G
chr1	59842714	T	C	2346	67	0.940298	0	0,0,47,20	MODIFIER	NONE	intron_variant	Bmpr2	c.530-29T>C
chr1	59852488	G	A	2137	60	0.966667	0	0,0,9,51	MODIFIER	NONE	intron_variant	Bmpr2	c.1276+47G>A
chr1	59863843	C	A	2155	60	0.966667	3	0,1,34,25	LOW	NONE	synonymous_variant	Bmpr2	c.1476C>A
chr1	59863926	C	A	1440	63	0.666667	7	11,7,18,27	MODERATE	NONE	missense_variant	Bmpr2	c.1559C>A
chr1	59949069	G	A	14355	410	0.941463	0	0,0,211,198	LOW	NONE	synonymous_variant	Fam117b	c.606G>A
chr1	59949161	T	G	6071	171	0.97076	0	0,0,18,153	MODERATE	NONE	missense_variant	Fam117b	c.698T>G
chr1	60006139	C	T	2475	72	0.944444	0	1,0,66,5	MODIFIER	MODIFIER	NONE	NONE	intron_variant
chr1	60006224	T	G	6863	196	0.969388	0	0,0,112,84	MODIFIER	MODIFIER	NONE	NONE	intron_variant
chr1	60007844	G	A	5683	161	0.968944	0	0,0,75,86	LOW	LOW	NONE	NONE	synonymous_variant
chr1	60010242	C	T	3283	94	0.957447	0	0,0,30,64	LOW	LOW	NONE	NONE	splice_region_variant&intron_variant
chr1	60013891	G	A	2317	68	0.955882	0	0,0,54,14	LOW	LOW	NONE	NONE	synonymous_variant
chr1	60015686	C	T	4703	139	0.935252	0	0,0,94,45	MODIFIER	MODIFIER	NONE	NONE	intron_variant
chr1	60022471	A	G	2199	60	0.983333	0	0,0,58,2	MODIFIER	MODIFIER	MODIFIER	NONE	NONE
chr1	60022572	C	T	9283	260	0.965385	0	0,0,145,115	LOW	LOW	LOW	NONE	NONE
chr1	60051998	C	G	2129	64	0.921875	0	0,0,34,29	MODIFIER	NONE	intergenic_region	Ica1l-Wdr12	n.60051998C>G
chr1	60078122	A	C	2083	238	0.302521	0	116,48,51,22	MODIFIER	MODIFIER	MODIFIER	NONE	NONE
chr1	60078184	T	C	9531	275	0.941818	0	0,1,120,154	MODERATE	MODERATE	MODERATE	NONE	NONE
chr1	60109225	C	T	2133	58	0.982759	0	0,0,50,8	MODERATE	MODIFIER	MODIFIER	MODIFIER	NONE
chr1	60117580	C	T	14827	508	0.935039	0	0,0,280,228	MODIFIER	MODIFIER	MODIFIER	MODIFIER	NONE
chr1	60139351	G	A	3154	87	0.965517	0	0,0,32,55	LOW	LOW	LOW	MODIFIER	NONE
chr1	60194452	C	T	2828	79	0.987342	0	0,0,63,16	MODIFIER	NONE	intron_variant	Nbeal1	c.52-52C>T
chr1	60194527	G	C	5220	143	0.979021	0	0,0,70,73	LOW	NONE	synonymous_variant	Nbeal1	c.75G>C
chr1	60194620	C	T	1852	50	1	0	0,0,2,48	MODIFIER	NONE	intron_variant	Nbeal1	c.143+25C>T
chr1	60236535	G	A	3891	118	0.90678	0	0,0,23,95	MODIFIER	NONE	intron_variant	Nbeal1	c.1995+32G>A
chr1	60267508	C	T	3921	113	0.964602	0	0,0,69,44	MODIFIER	NONE	intron_variant	Nbeal1	c.4747-251C>T
chr1	60289882	G	GA	2262	58	1	0	0,0,50,8	MODIFIER	NONE	intron_variant	Nbeal1	c.6491-33_6491-32insA
chr1	60289893	AT	A	1565	72	0.875	7	9,0,49,14	MODIFIER	NONE	intron_variant	Nbeal1	c.6491-21delT
chr1	60291911	G	A	2745	75	0.986667	0	0,0,28,47	LOW	NONE	synonymous_variant	Nbeal1	c.6678G>A
chr1	60311179	A	G	1926	54	0.981481	0	0,0,4,50	MODIFIER	NONE	intron_variant	Nbeal1	c.7306+80A>G
chr1	60312104	A	AGTTCT	1929	58	0.827586	0	10,0,45,3	MODIFIER	NONE	intron_variant	Nbeal1	c.7307-47_7307-46insGTTCT
chr1	60312119	T	G	3641	106	0.943396	0	0,0,89,17	MODIFIER	NONE	intron_variant	Nbeal1	c.7307-32T>G
chr1	60312282	G	T	3028	86	0.988372	0	0,1,6,79	MODIFIER	NONE	intron_variant	Nbeal1	c.7401+37G>T
chr1	60312295	G	A	2447	67	1	0	0,0,2,65	MODIFIER	NONE	intron_variant	Nbeal1	c.7401+50G>A
chr1	60312298	A	G	2353	63	1	0	0,0,1,62	MODIFIER	NONE	intron_variant	Nbeal1	c.7401+53A>G
chr1	60312304	CT	C	1956	59	0.864407	0	0,8,0,51	MODIFIER	NONE	intron_variant	Nbeal1	c.7401+60delT
chr1	60319647	ATCTCTGG	A	2151	55	0.963636	0	2,0,36,17	MODIFIER	NONE	intron_variant	Nbeal1	c.7519-23_7519-17delTCTCTGG
chr1	60319729	T	C	3184	88	0.977273	0	0,1,44,43	MODERATE	NONE	missense_variant	Nbeal1	c.7577T>C
chr1	60319757	A	C	3059	85	0.976471	0	0,0,40,45	LOW	NONE	synonymous_variant	Nbeal1	c.7605A>C
chr1	60329343	A	T	5752	168	0.928571	0	0,0,108,60	MODERATE	NONE	missense_variant	Nbeal1	c.7846A>T
chr1	60343322	C	T	2345	86	0.767442	0	0,0,64,22	MODIFIER	MODIFIER	NONE	NONE	5_prime_UTR_variant
chr1	60353053	A	G	7346	210	0.942857	0	0,0,91,119	LOW	MODIFIER	NONE	NONE	synonymous_variant
chr1	60366620	A	G	4314	117	1	0	0,0,81,36	MODIFIER	MODIFIER	NONE	NONE	intron_variant
chr1	60372581	T	TTTGG	4208	164	0.780488	0	23,14,78,50	LOW	LOW	NONE	NONE	splice_region_variant&intron_variant
chr1	60372664	A	T	3171	104	0.826923	0	0,0,28,76	MODIFIER	MODIFIER	NONE	NONE	intron_variant
chr1	60382341	T	C	3622	102	0.970588	0	0,0,87,15	MODIFIER	MODIFIER	NONE	NONE	intron_variant
chr1	60441443	CT	C	178	99	0.131313	8	59,27,6,7	MODIFIER	MODIFIER	MODIFIER	NONE	NONE
chr1	60441455	C	A	96	120	0.041667	0	68,46,3,2	MODIFIER	MODIFIER	MODIFIER	NONE	NONE
chr1	60441461	G	A	313	131	0.099237	11	68,46,12,2	MODIFIER	MODIFIER	MODIFIER	NONE	NONE
chr1	60441493	A	G	479	129	0.139535	17	63,42,17,2	MODIFIER	MODIFIER	MODIFIER	NONE	NONE
chr1	60447187	G	T	2973	83	0.963855	0	0,0,75,8	MODIFIER	MODIFIER	MODIFIER	NONE	NONE
chr1	60448281	ATG	A	120	53	0.075472	0	4,45,0,4	MODIFIER	MODIFIER	MODIFIER	NONE	NONE
chr1	60453542	A	G	3763	107	0.981308	0	0,0,93,14	MODIFIER	MODIFIER	MODIFIER	NONE	NONE
chr1	60470855	G	C	1774	51	0.941176	0	0,0,13,38	MODIFIER	MODIFIER	MODIFIER	NONE	NONE
chr1	60495482	G	A	2906	81	0.987654	0	0,0,53,28	LOW	NONE	synonymous_variant	Raph1	c.1569C>T
chr1	60503465	C	CAA	120	81	0.135802	0	53,8,10,1	MODIFIER	NONE	intron_variant	Raph1	c.813+52_813+53insTT
chr1	60503465	C	A	121	81	0.135802	68	68,1,4,8	MODIFIER	NONE	intron_variant	Raph1	c.813+53G>T
chr1	60503480	G	A	104	104	0.096154	20	60,28,15,0	MODIFIER	NONE	intron_variant	Raph1	c.813+38C>T
chr1	60503495	C	T	3712	139	0.741007	0	2,0,97,37	MODIFIER	NONE	intron_variant	Raph1	c.813+23G>A
chr1	60746533	G	A	4905	140	0.964286	0	0,0,46,94	LOW	NONE	splice_region_variant&intron_variant	Cd28	c.55+5G>A
chr1	60762963	G	GTTT	1556	63	0.809524	1	6,1,36,15	MODIFIER	NONE	intron_variant	Cd28	c.56-16_56-15insTTT
chr1	60809538	G	A	2661	73	0.972603	0	0,0,43,30	MODIFIER	NONE	intergenic_region	Cd28-Ctla4	n.60809538G>A
chr1	60900920	G	A	94	54	0.092593	2	39,9,5,0	MODIFIER	NONE	intergenic_region	Cd28-Ctla4	n.60900920G>A
chr1	60900945	C	T	127	63	0.111111	7	41,14,8,0	MODIFIER	NONE	intergenic_region	Cd28-Ctla4	n.60900945C>T
chr1	60900989	G	A	279	110	0.136364	5	53,39,8,10	MODIFIER	NONE	intergenic_region	Cd28-Ctla4	n.60900989G>A
chr1	60901056	G	A	130	137	0.051095	9	67,63,1,6	MODIFIER	NONE	intergenic_region	Cd28-Ctla4	n.60901056G>A
chr1	60901069	C	T	4309	120	0.966667	0	0,0,62,58	MODIFIER	NONE	intergenic_region	Cd28-Ctla4	n.60901069C>T
chr1	60901227	A	C	3369	111	0.963964	0	0,0,49,62	MODIFIER	NONE	intergenic_region	Cd28-Ctla4	n.60901227A>C
chr1	60901376	G	A	122	100	0.06	0	39,55,2,4	MODIFIER	NONE	intergenic_region	Cd28-Ctla4	n.60901376G>A
chr1	60901409	G	A	108	79	0.063291	1	27,47,1,4	MODIFIER	NONE	intergenic_region	Cd28-Ctla4	n.60901409G>A
chr1	60912499	A	G	3227	92	0.956522	0	0,0,49,43	LOW	LOW	NONE	NONE	synonymous_variant
chr1	60977978	G	A	4347	122	0.97541	0	0,0,58,64	MODERATE	NONE	missense_variant	Icos	c.20G>A
chr1	60993627	T	G	1920	56	0.964286	0	0,0,55,1	MODIFIER	NONE	intron_variant	Icos	c.59-75T>G
chr1	60993651	G	A	3103	87	0.965517	0	0,0,81,6	MODIFIER	NONE	intron_variant	Icos	c.59-51G>A
chr1	60994759	GTTT	G	467	70	0.4	1	4,37,1,27	MODIFIER	NONE	intron_variant	Icos	c.504+44_504+46delTTT
chr1	60995695	A	AT	1411	53	0.830189	0	0,10,0,44	MODIFIER	NONE	intron_variant	Icos	c.589+87_589+88insT
chr1	61076139	G	A	10934	314	0.952229	0	0,0,144,170	MODIFIER	NONE	intergenic_region	Icos-9530026F06Rik	n.61076139G>A
chr1	62764998	AG	A	1004	78	0.641026	79	29,7,9,41	LOW	LOW	LOW	LOW	LOW
chr1	63151632	A	G	2160	59	1	0	0,0,20,39	MODERATE	MODERATE	MODERATE	MODERATE	MODIFIER
chr1	63334482	T	G	895	100	0.31	0	37,30,17,16	MODIFIER	NONE	intergenic_region	Zdbf2-Adam23	n.63334482T>G
chr1	63543216	T	G	2124	246	0.308943	6	31,136,20,59	MODIFIER	NONE	intron_variant	Adam23	c.996+26T>G
chr1	64734996	G	C	788	126	0.238095	2	64,29,25,8	MODERATE	MODERATE	NONE	NONE	missense_variant
chr1	64994557	T	G	505	50	0.36	0	9,23,5,13	MODIFIER	NONE	intergenic_region	Plekhm3-Akr1cl	n.64994557T>G
chr1	65175372	AT	A	95	51	0.078431	5	17,32,0,4	LOW	LOW	NONE	NONE	splice_region_variant&intron_variant
chr1	65222195	G	GT	86	57	0.105263	0	51,0,6,0	MODIFIER	MODIFIER	NONE	NONE	intron_variant
chr1	65268845	A	T	872	126	0.246032	3	26,67,7,26	MODERATE	MODERATE	NONE	NONE	missense_variant
chr1	65872819	G	GAA	106	176	0.034091	10	102,68,6,0	MODIFIER	NONE	intergenic_region	Pth2r-Crygf	n.65872819_65872820insAA
chr1	65872875	G	T	169	175	0.057143	2	59,105,5,6	MODIFIER	NONE	intergenic_region	Pth2r-Crygf	n.65872875G>T
chr1	65872881	T	C	106	160	0.0375	3	49,104,1,6	MODIFIER	NONE	intergenic_region	Pth2r-Crygf	n.65872881T>C
chr1	65872884	T	C	125	155	0.045161	1	46,102,1,6	MODIFIER	NONE	intergenic_region	Pth2r-Crygf	n.65872884T>C
chr1	65872886	C	G	126	149	0.04698	1	43,99,1,6	MODIFIER	NONE	intergenic_region	Pth2r-Crygf	n.65872886C>G
chr1	65872894	C	T	128	137	0.051095	1	34,96,1,6	MODIFIER	NONE	intergenic_region	Pth2r-Crygf	n.65872894C>T
chr1	65872911	A	C	110	109	0.055046	2	20,83,0,6	MODIFIER	NONE	intergenic_region	Pth2r-Crygf	n.65872911A>C
chr1	66416911	AT	A	309	75	0.226667	0	20,39,5,12	MODIFIER	MODIFIER	MODIFIER	NONE	NONE
chr1	66425141	CGT	C	517	96	0.1875	4	75,1,17,1	MODIFIER	MODIFIER	MODIFIER	NONE	NONE
chr1	66425141	CGTGT	C	73	96	0.03125	0	75,1,3,0	MODIFIER	MODIFIER	MODIFIER	NONE	NONE
chr1	66473494	T	C	692	74	0.324324	0	18,29,9,18	MODERATE	NONE	missense_variant	Unc80	c.562T>C
chr1	66641571	A	C	1084	127	0.299213	0	70,15,36,6	MODIFIER	NONE	intron_variant	Unc80	c.6370-45A>C
chr1	66672849	GCT	G	290	139	0.071942	3	30,100,1,9	MODIFIER	NONE	intron_variant	Unc80	c.8262+68_8262+69delCT
chr1	66685672	G	C	1674	224	0.267857	0	64,95,26,39	MODERATE	NONE	missense_variant	Unc80	c.9320G>C
chr1	66695439	C	T	1579	163	0.331288	2	55,52,25,31	MODERATE	NONE	missense_variant	Unc80	c.9824C>T
chr1	66714640	A	G	883	100	0.31	1	40,29,16,15	MODERATE	MODERATE	MODERATE	MODERATE	MODIFIER
chr1	66924951	GT	G	236	55	0.309091	0	32,1,16,1	MODIFIER	MODIFIER	NONE	NONE	intron_variant
chr1	66934553	AAG	A	183	172	0.040698	3	77,91,2,5	MODIFIER	MODIFIER	NONE	NONE	intron_variant
chr1	67196626	C	A	615	61	0.344262	1	6,32,5,18	MODIFIER	NONE	intron_variant	Cps1	c.2895+23C>A
chr1	67196637	C	T	533	51	0.352941	1	4,29,3,15	MODIFIER	NONE	intron_variant	Cps1	c.2895+34C>T
chr1	68040110	C	T	3286	92	0.967391	0	0,0,41,51	LOW	NONE	synonymous_variant	Erbb4	c.3810G>A
chr1	68042505	C	T	8694	251	0.952191	0	0,0,157,94	LOW	NONE	synonymous_variant	Erbb4	c.3369G>A
chr1	68044008	G	GAA	987	149	0.33557	52	20,28,2,48	MODIFIER	NONE	intron_variant	Erbb4	c.3136-1271_3136-1270insTT
chr1	68044008	G	GA	1050	149	0.355705	20	20,28,9,44	MODIFIER	NONE	intron_variant	Erbb4	c.3136-1271_3136-1270insT
chr1	68071704	T	A	3085	89	0.966292	0	0,0,32,57	MODIFIER	NONE	intron_variant	Erbb4	c.2965-16A>T
chr1	68080579	A	T	7475	214	0.971963	0	0,0,161,53	MODIFIER	NONE	intron_variant	Erbb4	c.2643+61T>A
chr1	68080769	C	T	3510	99	0.979798	0	0,0,15,84	LOW	NONE	synonymous_variant	Erbb4	c.2514G>A
chr1	68080808	C	T	2115	61	0.95082	0	0,0,7,54	MODIFIER	NONE	intron_variant	Erbb4	c.2488-13G>A
chr1	68198884	A	G	2075	58	0.982759	0	0,0,40,18	LOW	NONE	synonymous_variant	Erbb4	c.2445T>C
chr1	68250537	C	CTCTT	1894	54	0.925926	0	4,0,48,2	MODIFIER	NONE	intron_variant	Erbb4	c.2301+42_2301+43insAAGA
chr1	68250616	T	C	4069	117	0.940171	0	0,0,58,59	LOW	NONE	synonymous_variant	Erbb4	c.2265A>G
chr1	68250688	G	GAA	2274	68	0.867647	2	2,8,8,51	MODIFIER	NONE	intron_variant	Erbb4	c.2203-11_2203-10insTT
chr1	68254720	C	CT	2057	66	0.833333	15	3,8,2,53	MODIFIER	NONE	intron_variant	Erbb4	c.2080-70_2080-69insA
chr1	68293282	T	C	9156	257	0.972763	6	0,1,196,60	MODIFIER	NONE	intron_variant	Erbb4	c.1872-2965A>G
chr1	68293381	T	C	11616	329	0.957447	0	0,0,128,201	MODIFIER	NONE	intron_variant	Erbb4	c.1872-3064A>G
chr1	68293417	T	C	7787	232	0.943965	0	0,0,80,152	MODIFIER	NONE	intron_variant	Erbb4	c.1872-3100A>G
chr1	68293517	C	T	5590	160	0.96875	0	0,0,64,96	MODIFIER	NONE	intron_variant	Erbb4	c.1872-3200G>A
chr1	68293613	T	C	4427	128	0.960938	0	0,0,60,68	MODIFIER	NONE	intron_variant	Erbb4	c.1872-3296A>G
chr1	68293642	T	G	4302	125	0.96	0	0,0,60,65	MODIFIER	NONE	intron_variant	Erbb4	c.1872-3325A>C
chr1	68293759	C	A	2296	65	0.969231	0	0,0,9,56	MODIFIER	NONE	intron_variant	Erbb4	c.1872-3442G>T
chr1	68309581	C	T	2277	64	0.953125	0	0,0,34,30	MODIFIER	NONE	intron_variant	Erbb4	c.1622+14G>A
chr1	68331272	G	A	5161	142	0.971831	0	0,0,80,62	LOW	NONE	synonymous_variant	Erbb4	c.1146C>T
chr1	68331339	T	A	3161	86	1	0	0,0,19,67	MODIFIER	NONE	intron_variant	Erbb4	c.1125-46A>T
chr1	68339431	T	C	5258	151	0.953642	0	0,0,69,82	LOW	NONE	synonymous_variant	Erbb4	c.1050A>G
chr1	68343795	T	C	1984	55	0.981818	0	0,0,51,4	MODIFIER	NONE	intron_variant	Erbb4	c.997+45A>G
chr1	68343856	G	A	3863	117	0.923077	0	0,0,76,40	LOW	NONE	synonymous_variant	Erbb4	c.981C>T
chr1	68343987	C	T	1994	59	0.915254	0	0,0,4,55	MODIFIER	NONE	intron_variant	Erbb4	c.884-34G>A
chr1	68346646	T	C	4370	118	0.991525	0	0,0,61,57	LOW	NONE	synonymous_variant	Erbb4	c.783A>G
chr1	68349291	A	C	2935	84	0.952381	0	0,0,49,35	MODIFIER	NONE	intron_variant	Erbb4	c.741+10T>G
chr1	68349468	A	G	2683	85	0.882353	0	0,0,24,61	MODIFIER	NONE	intron_variant	Erbb4	c.623-49T>C
chr1	68370432	G	A	1801	52	0.942308	0	0,0,37,14	MODIFIER	NONE	intron_variant	Erbb4	c.622+23C>T
chr1	68370444	T	C	2202	62	0.967742	0	0,0,43,19	MODIFIER	NONE	intron_variant	Erbb4	c.622+11A>G
chr1	68370541	T	C	2014	62	0.919355	0	0,0,18,44	MODIFIER	NONE	intron_variant	Erbb4	c.557-21A>G
chr1	68370542	G	A	2053	60	0.966667	0	0,0,16,44	MODIFIER	NONE	intron_variant	Erbb4	c.557-22C>T
chr1	68595631	G	A	2135	60	0.983333	0	0,0,11,49	MODIFIER	NONE	intron_variant	Erbb4	c.235-34949C>T
chr1	71278758	TTATTC	T	1221	103	0.349515	1	58,10,32,4	MODIFIER	NONE	intron_variant	Abca12	c.5562+49_5562+53delGAATA
chr1	71599264	T	C	908	101	0.316832	0	31,37,14,19	LOW	LOW	LOW	LOW	LOW
chr1	71612627	G	A	927	103	0.31068	0	33,37,16,17	HIGH	HIGH	HIGH	HIGH	HIGH
chr1	71626295	T	G	612	78	0.282051	3	14,40,9,15	MODIFIER	MODIFIER	MODIFIER	MODIFIER	MODIFIER
chr1	71650712	GA	G	512	75	0.373333	4	20,29,8,20	MODIFIER	MODIFIER	MODIFIER	MODIFIER	MODIFIER
chr1	71714692	T	G	1356	139	0.338129	0	42,46,25,25	MODIFIER	NONE	intergenic_region	Apol7d-Gm8883	n.71714692T>G
chr1	71855272	T	C	99	124	0.040323	4	84,35,5,0	MODIFIER	NONE	intergenic_region	Apol7d-Gm8883	n.71855272T>C
chr1	71855301	T	C	183	170	0.052941	0	90,71,5,4	MODIFIER	NONE	intergenic_region	Apol7d-Gm8883	n.71855301T>C
chr1	72088252	C	T	113	270	0.025926	17	143,120,7,0	MODIFIER	NONE	intergenic_region	4933417E11Rik-Mreg	n.72088252C>T
chr1	72088407	C	T	835	188	0.218085	7	41,104,7,35	MODIFIER	NONE	intergenic_region	4933417E11Rik-Mreg	n.72088407C>T
chr1	72088425	T	C	410	142	0.161972	23	29,88,0,24	MODIFIER	NONE	intergenic_region	4933417E11Rik-Mreg	n.72088425T>C
chr1	72088441	T	G	271	120	0.125	11	19,85,0,16	MODIFIER	NONE	intergenic_region	4933417E11Rik-Mreg	n.72088441T>G
chr1	72088448	T	G	159	108	0.092593	6	18,79,0,11	MODIFIER	NONE	intergenic_region	4933417E11Rik-Mreg	n.72088448T>G
chr1	72274825	TC	T	978	132	0.386364	6	67,17,45,6	MODIFIER	NONE	intron_variant	Pecr	c.506+60delG
chr1	72459478	A	G	116	156	0.038462	7	107,43,6,0	MODIFIER	NONE	intron_variant	2022-03-04	c.514-6881T>C
chr1	72459506	G	A	554	203	0.1133	25	109,70,22,2	MODIFIER	NONE	intron_variant	2022-03-04	c.514-6909C>T
chr1	72459525	C	A	986	234	0.17094	32	108,86,34,6	MODIFIER	NONE	intron_variant	2022-03-04	c.514-6928G>T
chr1	72459547	A	G	870	271	0.140221	30	109,117,34,11	MODIFIER	NONE	intron_variant	2022-03-04	c.514-6950T>C
chr1	72459574	G	A	853	287	0.12892	9	124,124,25,14	MODIFIER	NONE	intron_variant	2022-03-04	c.514-6977C>T
chr1	72459581	T	C	610	271	0.103321	0	124,119,15,13	MODIFIER	NONE	intron_variant	2022-03-04	c.514-6984A>G
chr1	72459583	C	A	583	272	0.099265	0	124,120,15,13	MODIFIER	NONE	intron_variant	2022-03-04	c.514-6986G>T
chr1	72620059	C	T	1969	203	0.330049	7	67,65,43,28	LOW	NONE	synonymous_variant	Smarcal1	c.2043C>T
chr1	72874091	C	G	94	89	0.05618	0	40,42,3,4	MODERATE	NONE	missense_variant	Igfbp5	c.49G>C
chr1	72934084	T	TA	70	149	0.060403	0	119,21,8,1	MODIFIER	NONE	intergenic_region	Igfbp5-Tnp1	n.72934084_72934085insA
chr1	72934084	TA	T	678	149	0.315436	0	84,14,40,7	MODIFIER	NONE	intergenic_region	Igfbp5-Tnp1	n.72934085delA
chr1	74079143	CCAA	C	80	92	0.032609	0	78,12,3,0	MODIFIER	MODIFIER	NONE	NONE	intron_variant
chr1	74251234	TTC	T	172	89	0.067416	4	57,26,3,3	MODIFIER	NONE	intron_variant	Arpc2	c.223-19_223-18delTC
chr1	74332572	G	C	591	60	0.366667	2	35,1,22,2	MODIFIER	MODIFIER	NONE	NONE	upstream_gene_variant
chr1	74368085	C	T	579	68	0.294118	1	32,16,12,8	MODIFIER	NONE	intron_variant	Catip	c.737-49C>T
chr1	74380550	CT	C	175	89	0.157303	4	66,9,11,3	MODIFIER	NONE	intron_variant	Slc11a1	c.563-58delT
chr1	74575851	TG	T	72	162	0.018519	5	107,54,1,2	HIGH	HIGH	NONE	NONE	frameshift_variant
chr1	74595777	A	G	903	141	0.234043	0	59,44,21,17	MODIFIER	MODIFIER	MODIFIER	MODIFIER	NONE
chr1	74904730	G	C	190	307	0.032573	0	198,99,7,3	MODERATE	MODIFIER	NONE	NONE	missense_variant
chr1	74918418	T	G	1537	146	0.369863	0	36,54,21,35	MODERATE	NONE	missense_variant	Ccdc108	c.2991A>C
chr1	75190391	G	C	915	95	0.336842	4	23,39,9,24	MODERATE	MODERATE	MODIFIER	MODIFIER	MODIFIER
chr1	75275682	TC	T	76	125	0.024	0	55,68,1,2	HIGH	MODIFIER	NONE	NONE	frameshift_variant
chr1	75383301	A	AC	506	135	0.214815	6	0,111,1,28	MODIFIER	MODIFIER	MODIFIER	NONE	NONE
chr1	75403679	TTG	T	234	60	0.15	2	45,6,7,2	MODIFIER	MODIFIER	MODIFIER	MODIFIER	NONE
chr1	75443207	TG	T	360	87	0.287356	11	53,38,9,16	MODIFIER	MODIFIER	NONE	NONE	downstream_gene_variant
chr1	75475490	T	C	801	85	0.329412	1	26,31,15,13	MODERATE	MODERATE	MODIFIER	MODIFIER	NONE
chr1	75486756	G	A	5950	181	0.900553	0	0,0,88,92	MODERATE	MODIFIER	NONE	NONE	missense_variant
chr1	75502212	T	C	1807	50	0.96	0	0,0,23,27	LOW	LOW	MODIFIER	NONE	NONE
chr1	75525040	A	C	880	123	0.268293	1	65,24,27,7	MODIFIER	NONE	intron_variant	Stk11ip	c.268-48A>C
chr1	75624807	T	G	1253	127	0.338583	0	43,39,23,22	MODIFIER	NONE	intergenic_region	Slc4a3-Gm17751	n.75624807T>G
chr1	77050272	CAAAACA	C	85	50	0.12	0	38,6,6,0	MODIFIER	NONE	intergenic_region	Mir6343-Epha4	n.77050273_77050278delAAAACA
chr1	77050277	CA	C	728	51	0.666667	10	16,0,27,7	MODIFIER	NONE	intergenic_region	Mir6343-Epha4	n.77050278delA
chr1	77380875	A	G	1710	205	0.297561	0	75,64,35,31	MODERATE	NONE	missense_variant	Epha4	c.2485T>C
chr1	77387780	TG	T	2123	71	0.957747	0	3,0,54,14	MODIFIER	NONE	intron_variant	Epha4	c.2074+16delC
chr1	77388376	CG	C	2057	58	1	0	0,0,57,1	MODIFIER	NONE	intron_variant	Epha4	c.1888+96delC
chr1	78015462	C	T	104	51	0.156863	8	25,18,2,6	MODIFIER	NONE	intergenic_region	Epha4-Pax3	n.78015462C>T
chr1	78360209	A	G	1174	116	0.344828	0	30,40,19,27	MODERATE	NONE	missense_variant	Sgpp2	c.223A>G
chr1	78390677	TA	T	71	218	0.045872	14	69,137,0,10	MODIFIER	NONE	intron_variant	Sgpp2	c.423+24delA
chr1	78390678	AC	A	455	215	0.15814	3	50,90,9,25	MODIFIER	NONE	intron_variant	Sgpp2	c.423+25delC
chr1	78390678	ACC	A	532	215	0.176744	20	50,90,5,33	MODIFIER	NONE	intron_variant	Sgpp2	c.423+25_423+26delCC
chr1	78416946	T	C	4824	147	0.904762	0	0,0,69,78	LOW	MODIFIER	NONE	NONE	synonymous_variant
chr1	78425302	T	C	2715	83	0.927711	0	0,0,48,35	LOW	LOW	MODIFIER	MODIFIER	NONE
chr1	78471193	TA	T	178	136	0.117647	3	21,99,1,15	LOW	LOW	LOW	LOW	NONE
chr1	78523621	A	G	3012	91	0.923077	0	0,0,57,34	LOW	NONE	synonymous_variant	Mogat1	c.321A>G
chr1	78523681	A	G	4105	118	0.966102	0	0,0,66,52	LOW	NONE	synonymous_variant	Mogat1	c.381A>G
chr1	78527505	T	G	540	73	0.273973	0	40,12,16,5	MODIFIER	NONE	intron_variant	Mogat1	c.479-65T>G
chr1	78527506	A	T	603	78	0.307692	1	42,12,18,6	MODIFIER	NONE	intron_variant	Mogat1	c.479-64A>T
chr1	78529266	C	T	3062	85	1	0	0,0,18,67	MODIFIER	NONE	intron_variant	Mogat1	c.853+14C>T
chr1	78529276	G	A	2475	72	0.944444	0	0,0,11,61	MODIFIER	NONE	intron_variant	Mogat1	c.853+24G>A
chr1	78537954	C	T	2020	64	0.875	0	0,0,33,31	LOW	NONE	synonymous_variant	Mogat1	c.864C>T
chr1	78537971	C	T	2499	71	0.943662	0	0,0,37,34	MODERATE	NONE	missense_variant	Mogat1	c.881C>T
chr1	78664818	C	T	3909	112	0.9375	0	0,0,52,59	LOW	LOW	MODIFIER	MODIFIER	MODIFIER
chr1	78664914	G	A	2319	66	0.954545	0	0,0,24,42	LOW	LOW	MODIFIER	MODIFIER	MODIFIER
chr1	78664956	G	T	1876	56	0.910714	0	0,0,21,35	LOW	LOW	MODIFIER	MODIFIER	MODIFIER
chr1	78665012	G	A	3047	85	0.988235	0	0,0,61,24	MODERATE	MODERATE	MODIFIER	MODIFIER	MODIFIER
chr1	78665608	C	A	3199	94	0.93617	0	0,0,47,47	LOW	LOW	MODIFIER	MODIFIER	MODIFIER
chr1	78665646	G	A	3563	99	0.969697	0	0,0,51,48	LOW	LOW	MODIFIER	MODIFIER	MODIFIER
chr1	78666149	T	C	3581	98	0.979592	0	0,0,51,47	MODERATE	MODERATE	MODIFIER	MODIFIER	MODIFIER
chr1	78666462	G	A	2025	56	0.982143	0	0,0,24,32	LOW	LOW	MODIFIER	MODIFIER	MODIFIER
chr1	78699749	T	C	3190	94	0.93617	0	1,0,56,37	LOW	LOW	LOW	NONE	NONE
chr1	78783231	G	C	1425	54	0.907407	0	0,0,35,19	MODIFIER	NONE	intergenic_region	Acsl3-Kcne4	n.78783231G>C
chr1	78783238	G	A	1656	57	0.982456	0	0,0,36,21	MODIFIER	NONE	intergenic_region	Acsl3-Kcne4	n.78783238G>A
chr1	78783678	T	C	2047	58	0.982759	0	0,0,43,15	MODIFIER	NONE	intergenic_region	Acsl3-Kcne4	n.78783678T>C
chr1	78783735	G	C	2751	78	0.974359	0	0,0,48,30	MODIFIER	NONE	intergenic_region	Acsl3-Kcne4	n.78783735G>C
chr1	78783747	G	A	2951	83	0.975904	0	0,0,48,35	MODIFIER	NONE	intergenic_region	Acsl3-Kcne4	n.78783747G>A
chr1	78784402	C	A	2264	66	0.969697	0	0,0,47,19	MODIFIER	NONE	intergenic_region	Acsl3-Kcne4	n.78784402C>A
chr1	78784519	T	C	3818	104	0.990385	0	0,0,51,53	MODIFIER	NONE	intergenic_region	Acsl3-Kcne4	n.78784519T>C
chr1	78784600	T	C	3321	96	0.947917	0	0,0,43,53	MODIFIER	NONE	intergenic_region	Acsl3-Kcne4	n.78784600T>C
chr1	78784616	C	G	2915	80	1	0	0,0,36,44	MODIFIER	NONE	intergenic_region	Acsl3-Kcne4	n.78784616C>G
chr1	78784618	A	C	2903	79	1	0	0,0,34,45	MODIFIER	NONE	intergenic_region	Acsl3-Kcne4	n.78784618A>C
chr1	78784634	G	A	2964	86	0.94186	0	0,0,39,47	MODIFIER	NONE	intergenic_region	Acsl3-Kcne4	n.78784634G>A
chr1	78784640	C	A	3020	85	0.976471	0	0,0,39,46	MODIFIER	NONE	intergenic_region	Acsl3-Kcne4	n.78784640C>A
chr1	78784726	T	TA	2305	71	0.887324	12	6,2,22,41	MODIFIER	NONE	intergenic_region	Acsl3-Kcne4	n.78784726_78784727insA
chr1	78784734	G	A	2407	70	0.971429	0	0,0,22,48	MODIFIER	NONE	intergenic_region	Acsl3-Kcne4	n.78784734G>A
chr1	78967833	C	T	5065	147	0.952381	0	0,0,109,38	MODIFIER	NONE	intergenic_region	Kcne4-Scg2	n.78967833C>T
chr1	79435347	G	T	5779	165	0.957576	0	0,0,75,90	MODERATE	MODERATE	NONE	NONE	missense_variant
chr1	79436937	G	C	906	96	0.354167	1	12,50,5,29	MODERATE	MODERATE	NONE	NONE	missense_variant
chr1	79609164	C	G	4255	123	0.951219	0	0,0,67,56	MODIFIER	NONE	3_prime_UTR_variant	Ap1s3	c.*3G>C
chr1	79671815	C	A	8325	243	0.938272	0	0,0,142,101	MODIFIER	NONE	intron_variant	Ap1s3	c.3+35G>T
chr1	79671866	T	C	7827	243	0.893004	0	0,1,98,143	MODIFIER	NONE	5_prime_UTR_variant	Ap1s3	c.-14A>G
chr1	79776115	T	C	4241	123	0.943089	0	0,0,84,39	MODIFIER	NONE	5_prime_UTR_variant	Mrpl44	c.-18T>C
chr1	79776180	A	C	4210	129	0.899225	0	0,0,62,67	LOW	NONE	synonymous_variant	Mrpl44	c.48A>C
chr1	79776265	C	T	2444	77	0.857143	0	0,0,19,58	LOW	NONE	synonymous_variant	Mrpl44	c.133C>T
chr1	79777834	C	CCG	1756	55	0.890909	0	5,1,36,13	MODIFIER	NONE	intron_variant	Mrpl44	c.180-24_180-23insCG
chr1	79778056	C	T	5463	152	0.967105	0	0,0,63,89	LOW	NONE	synonymous_variant	Mrpl44	c.378C>T
chr1	79778269	G	A	3790	106	0.962264	0	0,0,40,66	LOW	NONE	synonymous_variant	Mrpl44	c.591G>A
chr1	79779598	T	C	2153	66	0.924242	0	1,0,36,28	LOW	NONE	synonymous_variant	Mrpl44	c.759T>C
chr1	79796795	C	T	2617	77	0.935065	0	0,0,53,24	MODIFIER	NONE	intron_variant	Serpine2	c.1156+31G>A
chr1	79799601	A	T	1711	52	0.942308	0	0,0,10,42	MODIFIER	NONE	intron_variant	Serpine2	c.986-47T>A
chr1	79821559	TA	T	623	51	0.588235	0	6,16,9,21	LOW	NONE	splice_region_variant&intron_variant	Serpine2	c.-22-3delT
chr1	79922454	G	C	2577	75	0.986667	0	0,0,50,25	MODIFIER	NONE	intergenic_region	Serpine2-Fam124b	n.79922454G>C
chr1	79922766	C	T	4456	129	0.945736	0	0,1,62,66	MODIFIER	NONE	intergenic_region	Serpine2-Fam124b	n.79922766C>T
chr1	79922976	A	C	2834	84	0.928571	0	0,0,40,44	MODIFIER	NONE	intergenic_region	Serpine2-Fam124b	n.79922976A>C
chr1	79923288	A	C	4313	128	0.9375	0	0,0,39,89	MODIFIER	NONE	intergenic_region	Serpine2-Fam124b	n.79923288A>C
chr1	80383608	G	A	105	77	0.064935	11	39,33,5,0	MODIFIER	NONE	intergenic_region	Cul3-1700016L21Rik	n.80383608G>A
chr1	80383615	G	A	107	83	0.060241	11	42,36,5,0	MODIFIER	NONE	intergenic_region	Cul3-1700016L21Rik	n.80383615G>A
chr1	80383647	G	A	172	93	0.086022	16	49,36,8,0	MODIFIER	NONE	intergenic_region	Cul3-1700016L21Rik	n.80383647G>A
chr1	80383658	T	A	172	86	0.093023	16	46,32,8,0	MODIFIER	NONE	intergenic_region	Cul3-1700016L21Rik	n.80383658T>A
chr1	80383664	G	A	170	85	0.094118	16	46,31,8,0	MODIFIER	NONE	intergenic_region	Cul3-1700016L21Rik	n.80383664G>A
chr1	80383666	A	G	171	84	0.095238	16	45,31,8,0	MODIFIER	NONE	intergenic_region	Cul3-1700016L21Rik	n.80383666A>G
chr1	80383683	A	C	123	83	0.072289	11	45,32,6,0	MODIFIER	NONE	intergenic_region	Cul3-1700016L21Rik	n.80383683A>C
chr1	80383684	G	A	126	83	0.072289	11	45,32,6,0	MODIFIER	NONE	intergenic_region	Cul3-1700016L21Rik	n.80383684G>A
chr1	80383690	G	A	115	88	0.068182	11	47,35,6,0	MODIFIER	NONE	intergenic_region	Cul3-1700016L21Rik	n.80383690G>A
chr1	80383692	C	T	116	86	0.069767	14	45,34,7,0	MODIFIER	NONE	intergenic_region	Cul3-1700016L21Rik	n.80383692C>T
chr1	80383707	C	A	156	99	0.080808	1	53,37,6,3	MODIFIER	NONE	intergenic_region	Cul3-1700016L21Rik	n.80383707C>A
chr1	80383713	G	A	191	103	0.087379	1	55,39,6,3	MODIFIER	NONE	intergenic_region	Cul3-1700016L21Rik	n.80383713G>A
chr1	80383727	CT	C	213	114	0.078947	2	61,47,4,5	MODIFIER	NONE	intergenic_region	Cul3-1700016L21Rik	n.80383728delT
chr1	80383734	C	CT	228	117	0.076923	1	59,50,4,5	MODIFIER	NONE	intergenic_region	Cul3-1700016L21Rik	n.80383734_80383735insT
chr1	80383770	C	G	715	168	0.172619	0	70,68,14,16	MODIFIER	NONE	intergenic_region	Cul3-1700016L21Rik	n.80383770C>G
chr1	80383792	G	A	664	161	0.167702	3	62,71,10,18	MODIFIER	NONE	intergenic_region	Cul3-1700016L21Rik	n.80383792G>A
chr1	80383796	T	G	665	158	0.170886	2	57,73,10,18	MODIFIER	NONE	intergenic_region	Cul3-1700016L21Rik	n.80383796T>G
chr1	80383807	G	A	493	152	0.138158	3	55,75,7,15	MODIFIER	NONE	intergenic_region	Cul3-1700016L21Rik	n.80383807G>A
chr1	80383811	C	T	470	147	0.136054	1	52,74,7,14	MODIFIER	NONE	intergenic_region	Cul3-1700016L21Rik	n.80383811C>T
chr1	80383814	A	T	460	139	0.143885	1	48,70,7,14	MODIFIER	NONE	intergenic_region	Cul3-1700016L21Rik	n.80383814A>T
chr1	80383821	T	A	470	124	0.153226	0	42,61,7,13	MODIFIER	NONE	intergenic_region	Cul3-1700016L21Rik	n.80383821T>A
chr1	80383823	C	G	470	122	0.155738	0	41,61,7,13	MODIFIER	NONE	intergenic_region	Cul3-1700016L21Rik	n.80383823C>G
chr1	80383840	C	T	499	109	0.192661	4	37,51,6,15	MODIFIER	NONE	intergenic_region	Cul3-1700016L21Rik	n.80383840C>T
chr1	80383851	A	G	129	81	0.074074	0	27,46,3,5	MODIFIER	NONE	intergenic_region	Cul3-1700016L21Rik	n.80383851A>G
chr1	80383854	G	A	152	79	0.088608	1	26,46,3,4	MODIFIER	NONE	intergenic_region	Cul3-1700016L21Rik	n.80383854G>A
chr1	80383859	G	T	111	72	0.069444	0	22,45,2,3	MODIFIER	NONE	intergenic_region	Cul3-1700016L21Rik	n.80383859G>T
chr1	80383863	A	G	110	69	0.072464	0	21,43,2,3	MODIFIER	NONE	intergenic_region	Cul3-1700016L21Rik	n.80383863A>G
chr1	80383865	CAA	C	136	65	0.076923	0	21,40,2,3	MODIFIER	NONE	intergenic_region	Cul3-1700016L21Rik	n.80383866_80383867delAA
chr1	80383872	C	T	111	63	0.079365	1	18,40,2,3	MODIFIER	NONE	intergenic_region	Cul3-1700016L21Rik	n.80383872C>T
chr1	80383890	T	C	228	63	0.142857	11	21,33,7,2	MODIFIER	NONE	intergenic_region	Cul3-1700016L21Rik	n.80383890T>C
chr1	80383894	A	G	251	63	0.15873	14	21,32,8,2	MODIFIER	NONE	intergenic_region	Cul3-1700016L21Rik	n.80383894A>G
chr1	80383898	C	T	347	64	0.21875	14	22,28,11,3	MODIFIER	NONE	intergenic_region	Cul3-1700016L21Rik	n.80383898C>T
chr1	80383917	A	G	353	62	0.209677	6	27,22,10,3	MODIFIER	NONE	intergenic_region	Cul3-1700016L21Rik	n.80383917A>G
chr1	80383923	G	A	287	62	0.177419	7	28,23,9,2	MODIFIER	NONE	intergenic_region	Cul3-1700016L21Rik	n.80383923G>A
chr1	80383928	C	T	358	61	0.213115	6	27,21,10,3	MODIFIER	NONE	intergenic_region	Cul3-1700016L21Rik	n.80383928C>T
chr1	80383933	C	G	293	63	0.174603	6	28,22,10,3	MODIFIER	NONE	intergenic_region	Cul3-1700016L21Rik	n.80383933C>G
chr1	80383938	A	G	393	67	0.223881	8	29,23,12,3	MODIFIER	NONE	intergenic_region	Cul3-1700016L21Rik	n.80383938A>G
chr1	80383942	G	A	427	72	0.222222	7	31,24,13,4	MODIFIER	NONE	intergenic_region	Cul3-1700016L21Rik	n.80383942G>A
chr1	80383958	TCTGA	T	654	80	0.25	0	38,23,12,8	MODIFIER	NONE	intergenic_region	Cul3-1700016L21Rik	n.80383959_80383962delCTGA
chr1	80383978	G	T	617	96	0.239583	0	39,34,12,11	MODIFIER	NONE	intergenic_region	Cul3-1700016L21Rik	n.80383978G>T
chr1	80384010	G	A	418	93	0.172043	2	31,46,5,11	MODIFIER	NONE	intergenic_region	Cul3-1700016L21Rik	n.80384010G>A
chr1	80384017	T	G	407	91	0.175824	1	29,46,5,11	MODIFIER	NONE	intergenic_region	Cul3-1700016L21Rik	n.80384017T>G
chr1	80384042	G	T	139	79	0.075949	1	23,50,1,5	MODIFIER	NONE	intergenic_region	Cul3-1700016L21Rik	n.80384042G>T
chr1	80384043	T	C	139	78	0.076923	1	22,50,1,5	MODIFIER	NONE	intergenic_region	Cul3-1700016L21Rik	n.80384043T>C
chr1	80384047	C	T	142	74	0.081081	1	21,47,1,5	MODIFIER	NONE	intergenic_region	Cul3-1700016L21Rik	n.80384047C>T
chr1	80384052	T	C	142	74	0.081081	1	20,48,1,5	MODIFIER	NONE	intergenic_region	Cul3-1700016L21Rik	n.80384052T>C
chr1	80384056	A	T	142	70	0.085714	0	18,46,1,5	MODIFIER	NONE	intergenic_region	Cul3-1700016L21Rik	n.80384056A>T
chr1	80384065	T	A	148	57	0.105263	0	12,39,1,5	MODIFIER	NONE	intergenic_region	Cul3-1700016L21Rik	n.80384065T>A
chr1	80384067	C	T	149	55	0.109091	0	11,38,1,5	MODIFIER	NONE	intergenic_region	Cul3-1700016L21Rik	n.80384067C>T
chr1	80384857	T	C	263	57	0.175439	0	31,16,7,3	MODIFIER	NONE	intergenic_region	Cul3-1700016L21Rik	n.80384857T>C
chr1	80384865	C	T	205	55	0.145455	10	31,16,8,0	MODIFIER	NONE	intergenic_region	Cul3-1700016L21Rik	n.80384865C>T
chr1	80384866	C	A	233	55	0.163636	0	25,13,6,3	MODIFIER	NONE	intergenic_region	Cul3-1700016L21Rik	n.80384866C>A
chr1	80384866	C	G	203	55	0.145455	10	25,13,8,0	MODIFIER	NONE	intergenic_region	Cul3-1700016L21Rik	n.80384866C>G
chr1	80384871	G	C	492	56	0.303571	4	26,13,14,3	MODIFIER	NONE	intergenic_region	Cul3-1700016L21Rik	n.80384871G>C
chr1	80384876	G	C	201	58	0.137931	10	34,16,8,0	MODIFIER	NONE	intergenic_region	Cul3-1700016L21Rik	n.80384876G>C
chr1	80384881	T	C	348	56	0.232143	8	29,14,12,1	MODIFIER	NONE	intergenic_region	Cul3-1700016L21Rik	n.80384881T>C
chr1	80384885	G	C	107	60	0.083333	0	39,16,4,1	MODIFIER	NONE	intergenic_region	Cul3-1700016L21Rik	n.80384885G>C
chr1	80384888	T	C	92	57	0.070175	2	38,15,4,0	MODIFIER	NONE	intergenic_region	Cul3-1700016L21Rik	n.80384888T>C
chr1	80384890	C	T	177	57	0.122807	10	34,15,8,0	MODIFIER	NONE	intergenic_region	Cul3-1700016L21Rik	n.80384890C>T
chr1	80384895	C	T	297	55	0.218182	19	27,16,12,0	MODIFIER	NONE	intergenic_region	Cul3-1700016L21Rik	n.80384895C>T
chr1	80384897	A	G	242	53	0.169811	16	26,17,10,0	MODIFIER	NONE	intergenic_region	Cul3-1700016L21Rik	n.80384897A>G
chr1	80384932	A	G	94	56	0.071429	8	22,30,0,4	MODIFIER	NONE	intergenic_region	Cul3-1700016L21Rik	n.80384932A>G
chr1	80384938	G	C	274	57	0.175439	23	22,25,0,10	MODIFIER	NONE	intergenic_region	Cul3-1700016L21Rik	n.80384938G>C
chr1	80384941	T	A	94	56	0.071429	5	21,31,0,4	MODIFIER	NONE	intergenic_region	Cul3-1700016L21Rik	n.80384941T>A
chr1	80384948	G	C	95	56	0.071429	5	20,32,0,4	MODIFIER	NONE	intergenic_region	Cul3-1700016L21Rik	n.80384948G>C
chr1	80384958	G	T	234	59	0.152542	16	20,30,0,9	MODIFIER	NONE	intergenic_region	Cul3-1700016L21Rik	n.80384958G>T
chr1	80385197	G	T	514	65	0.276923	10	17,30,11,7	MODIFIER	NONE	intergenic_region	Cul3-1700016L21Rik	n.80385197G>T
chr1	80385225	A	G	437	53	0.320755	14	7,28,9,9	MODIFIER	NONE	intergenic_region	Cul3-1700016L21Rik	n.80385225A>G
chr1	80575955	GAC	G	288	66	0.151515	16	20,33,0,10	MODIFIER	MODIFIER	NONE	NONE	intron_variant
chr1	80585019	C	A	106	281	0.021352	39	133,134,0,14	LOW	LOW	NONE	NONE	synonymous_variant
chr1	82532988	GGA	G	291	98	0.102041	0	34,55,4,6	MODIFIER	NONE	intron_variant	Col4a4	c.571-11_571-10delTC
chr1	82649827	CTG	C	142	60	0.1	1	13,41,2,4	MODIFIER	NONE	intron_variant	Col4a3	c.324+28_324+29delTG
chr1	83188033	A	C	423	58	0.258621	0	6,37,2,13	MODIFIER	MODIFIER	NONE	NONE	intron_variant
chr1	83384866	C	T	1382	156	0.307692	0	71,35,34,16	MODIFIER	NONE	intron_variant	Sphkap	c.33-22538G>A
chr1	84730498	T	G	908	83	0.385542	2	36,15,25,7	MODIFIER	NONE	intron_variant	Trip12	c.5403+34A>C
chr1	84751758	GA	G	196	67	0.223881	3	36,11,13,2	MODIFIER	NONE	intron_variant	Trip12	c.3182-46delT
chr1	84754288	C	T	1536	197	0.274112	0	84,59,32,22	LOW	NONE	synonymous_variant	Trip12	c.3063G>A
chr1	84754419	T	TG	1260	181	0.265193	9	54,80,13,35	HIGH	NONE	frameshift_variant	Trip12	c.2931dupC
chr1	84763793	C	CA	111	126	0.071429	0	99,19,8,1	MODIFIER	NONE	intron_variant	Trip12	c.1698+45_1698+46insT
chr1	84963930	C	A	534	345	0.15942	0	286,0,59,0	MODIFIER	NONE	intergenic_region	Slc16a14-A530032D15Rik	n.84963930C>A
chr1	84963955	C	T	295	533	0.080675	0	486,0,47,0	MODIFIER	NONE	intergenic_region	Slc16a14-A530032D15Rik	n.84963955C>T
chr1	84963959	G	A	340	596	0.083893	0	542,0,54,0	MODIFIER	NONE	intergenic_region	Slc16a14-A530032D15Rik	n.84963959G>A
chr1	84963963	A	G	449	651	0.095238	0	587,0,64,0	MODIFIER	NONE	intergenic_region	Slc16a14-A530032D15Rik	n.84963963A>G
chr1	84963968	G	C	5084	705	0.479433	0	358,0,347,0	MODIFIER	NONE	intergenic_region	Slc16a14-A530032D15Rik	n.84963968G>C
chr1	84964002	G	A	167	1089	0.037649	0	1046,0,42,0	MODIFIER	NONE	intergenic_region	Slc16a14-A530032D15Rik	n.84964002G>A
chr1	84964053	G	C	3223	2700	0.121111	0	1389971200140	MODIFIER	NONE	intergenic_region	Slc16a14-A530032D15Rik	n.84964053G>C
chr1	84964112	T	A	4692	2952	0.142954	31	10101499140302	MODIFIER	NONE	intergenic_region	Slc16a14-A530032D15Rik	n.84964112T>A
chr1	84964150	C	T	2867	1820	0.142857	3	465,1086,74,194	MODIFIER	NONE	intergenic_region	Slc16a14-A530032D15Rik	n.84964150C>T
chr1	84964261	G	C	704	690	0.114493	0	361,249,47,33	MODIFIER	NONE	intergenic_region	Slc16a14-A530032D15Rik	n.84964261G>C
chr1	84964279	G	A	784	873	0.101947	0	560,219,69,25	MODIFIER	NONE	intergenic_region	Slc16a14-A530032D15Rik	n.84964279G>A
chr1	84964286	G	A	104	953	0.028332	14	698,228,25,2	MODIFIER	NONE	intergenic_region	Slc16a14-A530032D15Rik	n.84964286G>A
chr1	84964347	C	G	907	1265	0.088538	60	681,466,42,76	MODIFIER	NONE	intergenic_region	Slc16a14-A530032D15Rik	n.84964347C>G
chr1	84964355	G	A	135	1269	0.028369	32	688,544,10,27	MODIFIER	NONE	intergenic_region	Slc16a14-A530032D15Rik	n.84964355G>A
chr1	84964539	C	T	1503	729	0.163237	8	62,539,7,115	MODIFIER	NONE	intergenic_region	Slc16a14-A530032D15Rik	n.84964539C>T
chr1	84964546	A	G	107	633	0.030016	4	51,562,0,20	MODIFIER	NONE	intergenic_region	Slc16a14-A530032D15Rik	n.84964546A>G
chr1	84964611	AC	A	214	133	0.135338	4	11,109,0,18	MODIFIER	NONE	intergenic_region	Slc16a14-A530032D15Rik	n.84964612delC
chr1	84990519	T	A	267	54	0.37037	3	32,0,21,1	MODIFIER	NONE	intergenic_region	Slc16a14-A530032D15Rik	n.84990519T>A
chr1	84990522	G	C	275	62	0.33871	0	36,1,24,0	MODIFIER	NONE	intergenic_region	Slc16a14-A530032D15Rik	n.84990522G>C
chr1	84990532	G	C	382	103	0.349515	0	63,1,38,0	MODIFIER	NONE	intergenic_region	Slc16a14-A530032D15Rik	n.84990532G>C
chr1	84990542	CAG	C	399	129	0.170543	0	104,3,22,0	MODIFIER	NONE	intergenic_region	Slc16a14-A530032D15Rik	n.84990543_84990544delAG
chr1	84990552	CAG	C	518	172	0.122093	0	136,15,19,2	MODIFIER	NONE	intergenic_region	Slc16a14-A530032D15Rik	n.84990553_84990554delAG
chr1	84990554	G	GAGAGAGAC	136	185	0.037838	0	157,22,7,0	MODIFIER	NONE	intergenic_region	Slc16a14-A530032D15Rik	n.84990554_84990555insAGAGAGAC
chr1	84990591	C	T	2060	361	0.227147	1	204,69,68,20	MODIFIER	NONE	intergenic_region	Slc16a14-A530032D15Rik	n.84990591C>T
chr1	84990595	C	T	130	391	0.023018	9	279,103,9,0	MODIFIER	NONE	intergenic_region	Slc16a14-A530032D15Rik	n.84990595C>T
chr1	84990596	G	T	1895	399	0.195489	0	231,83,63,22	MODIFIER	NONE	intergenic_region	Slc16a14-A530032D15Rik	n.84990596G>T
chr1	84990601	A	C	157	424	0.025943	13	299,114,11,0	MODIFIER	NONE	intergenic_region	Slc16a14-A530032D15Rik	n.84990601A>C
chr1	84990615	A	G	428	456	0.057018	38	273,154,27,1	MODIFIER	NONE	intergenic_region	Slc16a14-A530032D15Rik	n.84990615A>G
chr1	84990622	G	A	5005	466	0.396996	1	166,107,121,72	MODIFIER	NONE	intergenic_region	Slc16a14-A530032D15Rik	n.84990622G>A
chr1	84990766	T	C	429	107	0.233645	9	9,71,0,27	MODIFIER	NONE	intergenic_region	Slc16a14-A530032D15Rik	n.84990766T>C
chr1	84990794	A	G	547	60	0.433333	0	0,33,0,27	MODIFIER	NONE	intergenic_region	Slc16a14-A530032D15Rik	n.84990794A>G
chr1	85012164	G	C	260	80	0.1625	9	38,27,4,9	MODIFIER	NONE	intergenic_region	Slc16a14-A530032D15Rik	n.85012164G>C
chr1	85012254	T	C	970	69	0.565217	0	13,15,17,24	MODIFIER	NONE	intergenic_region	Slc16a14-A530032D15Rik	n.85012254T>C
chr1	85012294	G	A	380	63	0.301587	5	22,18,9,14	MODIFIER	NONE	intergenic_region	Slc16a14-A530032D15Rik	n.85012294G>A
chr1	85012315	C	A	112	68	0.102941	11	37,23,2,6	MODIFIER	NONE	intergenic_region	Slc16a14-A530032D15Rik	n.85012315C>A
chr1	85012348	A	G	154	79	0.139241	46	55,12,2,10	MODIFIER	NONE	intergenic_region	Slc16a14-A530032D15Rik	n.85012348A>G
chr1	85012628	G	A	90	88	0.056818	1	44,38,4,2	MODIFIER	NONE	intergenic_region	Slc16a14-A530032D15Rik	n.85012628G>A
chr1	85012630	T	C	136	92	0.076087	21	42,42,8,0	MODIFIER	NONE	intergenic_region	Slc16a14-A530032D15Rik	n.85012630T>C
chr1	85012787	TAA	T	275	61	0.295082	8	9,32,1,17	MODIFIER	NONE	intergenic_region	Slc16a14-A530032D15Rik	n.85012788_85012789delAA
chr1	85028339	G	A	662	288	0.204861	16	197,32,57,2	MODIFIER	NONE	intergenic_region	Slc16a14-A530032D15Rik	n.85028339G>A
chr1	85028396	C	T	1403	738	0.174797	33	562,40,136,0	MODIFIER	NONE	intergenic_region	Slc16a14-A530032D15Rik	n.85028396C>T
chr1	85028524	A	T	10034	1703	0.343511	18	260824116503	MODIFIER	NONE	intergenic_region	Slc16a14-A530032D15Rik	n.85028524A>T
chr1	85028557	C	T	1932	854	0.167447	11	106,597,14,137	MODIFIER	NONE	intergenic_region	Slc16a14-A530032D15Rik	n.85028557C>T
chr1	85028610	A	G	120	144	0.069444	11	36,97,0,10	MODIFIER	NONE	intergenic_region	Slc16a14-A530032D15Rik	n.85028610A>G
chr1	85041867	G	A	2360	312	0.429487	4	84,88,76,64	MODIFIER	NONE	intergenic_region	Slc16a14-A530032D15Rik	n.85041867G>A
chr1	85061132	G	GA	845	393	0.152672	2	303,26,57,3	MODIFIER	NONE	intergenic_region	Slc16a14-A530032D15Rik	n.85061132_85061133insA
chr1	85061133	AAAAAAAAAAG	A	2027	407	0.211302	7	291,30,82,4	MODIFIER	NONE	intergenic_region	Slc16a14-A530032D15Rik	n.85061134_85061143delAAAAAAAAAG
chr1	85061197	T	C	4254	614	0.298046	2	232,185,104,91	MODIFIER	NONE	intergenic_region	Slc16a14-A530032D15Rik	n.85061197T>C
chr1	85061209	G	T	3324	610	0.252459	0	207,238,77,88	MODIFIER	NONE	intergenic_region	Slc16a14-A530032D15Rik	n.85061209G>T
chr1	85067452	C	T	201	95	0.147368	20	27,53,11,4	MODIFIER	NONE	intergenic_region	Slc16a14-A530032D15Rik	n.85067452C>T
chr1	85067689	A	G	330	286	0.118881	8	213,39,25,9	MODIFIER	NONE	intergenic_region	Slc16a14-A530032D15Rik	n.85067689A>G
chr1	85067736	A	G	904	304	0.243421	2	131,97,40,36	MODIFIER	NONE	intergenic_region	Slc16a14-A530032D15Rik	n.85067736A>G
chr1	85067855	A	T	391	107	0.252336	1	4,76,2,25	MODIFIER	NONE	intergenic_region	Slc16a14-A530032D15Rik	n.85067855A>T
chr1	85068932	A	C	598	210	0.180952	6	69,102,11,28	MODIFIER	NONE	intergenic_region	Slc16a14-A530032D15Rik	n.85068932A>C
chr1	85074915	T	A	95	50	0.14	0	43,0,7,0	MODIFIER	NONE	intergenic_region	Slc16a14-A530032D15Rik	n.85074915T>A
chr1	85074939	G	T	145	92	0.119565	0	81,0,11,0	MODIFIER	NONE	intergenic_region	Slc16a14-A530032D15Rik	n.85074939G>T
chr1	85074990	G	T	575	282	0.138298	0	239,0,43,0	MODIFIER	NONE	intergenic_region	Slc16a14-A530032D15Rik	n.85074990G>T
chr1	85075007	T	C	1848	410	0.243902	2	290,18,98,4	MODIFIER	NONE	intergenic_region	Slc16a14-A530032D15Rik	n.85075007T>C
chr1	85075021	AC	A	1818	571	0.182137	6	422,48,89,15	MODIFIER	NONE	intergenic_region	Slc16a14-A530032D15Rik	n.85075022delC
chr1	85075027	T	C	4438	651	0.330261	23	358,73,201,19	MODIFIER	NONE	intergenic_region	Slc16a14-A530032D15Rik	n.85075027T>C
chr1	85075029	T	A	213	685	0.032117	2	560,101,21,2	MODIFIER	NONE	intergenic_region	Slc16a14-A530032D15Rik	n.85075029T>A
chr1	85075059	A	C	18935	1005	0.703483	12	194,81,559,171	MODIFIER	NONE	intergenic_region	Slc16a14-A530032D15Rik	n.85075059A>C
chr1	85075098	G	T	3556	1417	0.155963	65	699,493,172,53	MODIFIER	NONE	intergenic_region	Slc16a14-A530032D15Rik	n.85075098G>T
chr1	85075112	T	G	997	1453	0.0585	3	715,651,49,37	MODIFIER	NONE	intergenic_region	Slc16a14-A530032D15Rik	n.85075112T>G
chr1	85075163	C	T	1127	1126	0.077265	4	294,743,29,60	MODIFIER	NONE	intergenic_region	Slc16a14-A530032D15Rik	n.85075163C>T
chr1	85075164	G	A	829	1112	0.06205	1	295,747,21,49	MODIFIER	NONE	intergenic_region	Slc16a14-A530032D15Rik	n.85075164G>A
chr1	85075189	T	C	2610	808	0.183168	30	79,579,5,145	MODIFIER	NONE	intergenic_region	Slc16a14-A530032D15Rik	n.85075189T>C
chr1	85075200	C	T	322	659	0.044006	8	44,586,4,25	MODIFIER	NONE	intergenic_region	Slc16a14-A530032D15Rik	n.85075200C>T
chr1	85075240	C	A	804	314	0.156051	0	13,252,2,47	MODIFIER	NONE	intergenic_region	Slc16a14-A530032D15Rik	n.85075240C>A
chr1	85075245	T	C	501	288	0.118056	0	12,241,1,34	MODIFIER	NONE	intergenic_region	Slc16a14-A530032D15Rik	n.85075245T>C
chr1	85075268	T	C	163	192	0.067708	3	7,171,1,12	MODIFIER	NONE	intergenic_region	Slc16a14-A530032D15Rik	n.85075268T>C
chr1	85075297	C	A	184	124	0.096774	0	4,107,0,13	MODIFIER	NONE	intergenic_region	Slc16a14-A530032D15Rik	n.85075297C>A
chr1	85075325	C	T	158	55	0.145455	0	1,46,0,8	MODIFIER	NONE	intergenic_region	Slc16a14-A530032D15Rik	n.85075325C>T
chr1	85075327	C	G	212	52	0.192308	0	1,41,0,10	MODIFIER	NONE	intergenic_region	Slc16a14-A530032D15Rik	n.85075327C>G
chr1	85080202	A	T	228	223	0.071749	14	107,100,13,3	MODIFIER	NONE	intergenic_region	Slc16a14-A530032D15Rik	n.85080202A>T
chr1	85080227	C	A	299	202	0.094059	28	74,109,15,4	MODIFIER	NONE	intergenic_region	Slc16a14-A530032D15Rik	n.85080227C>A
chr1	85084976	T	TAC	95	121	0.066116	0	105,7,8,0	MODIFIER	MODIFIER	NONE	NONE	downstream_gene_variant
chr1	85085007	C	G	557	249	0.128514	21	181,30,38,0	MODIFIER	MODIFIER	NONE	NONE	downstream_gene_variant
chr1	85085062	T	G	947	426	0.138498	3	283,77,49,17	MODIFIER	MODIFIER	NONE	NONE	downstream_gene_variant
chr1	85085068	A	G	1253	443	0.164786	25	258,107,68,10	MODIFIER	MODIFIER	NONE	NONE	downstream_gene_variant
chr1	85085131	G	A	1178	457	0.153173	9	138,241,20,56	MODIFIER	MODIFIER	NONE	NONE	downstream_gene_variant
chr1	85085168	G	A	1114	353	0.186969	15	35,251,2,65	MODIFIER	MODIFIER	NONE	NONE	downstream_gene_variant
chr1	85085190	C	T	904	257	0.206226	5	12,191,1,53	MODIFIER	MODIFIER	NONE	NONE	downstream_gene_variant
chr1	85085231	T	A	179	116	0.112069	0	2,101,0,13	MODIFIER	MODIFIER	NONE	NONE	downstream_gene_variant
chr1	85085235	T	C	377	107	0.242991	0	2,79,0,26	MODIFIER	MODIFIER	NONE	NONE	downstream_gene_variant
chr1	85089512	C	T	238	306	0.065359	11	202,84,10,10	MODIFIER	NONE	intron_variant	A530032D15Rik	c.597+15G>A
chr1	85089575	C	G	1824	431	0.220418	1	135,195,44,57	LOW	NONE	synonymous_variant	A530032D15Rik	c.549G>C
chr1	85089584	A	G	6002	403	0.57072	12	49103106145	LOW	NONE	splice_region_variant&intron_variant	A530032D15Rik	c.544-4T>C
chr1	85091036	C	A	576	67	0.477612	6	30,2,35,0	MODIFIER	NONE	intron_variant	A530032D15Rik	c.543+41G>T
chr1	85094146	A	T	123	50	0.14	0	41,1,8,0	MODIFIER	NONE	intron_variant	A530032D15Rik	c.430+151T>A
chr1	85094217	T	C	97	99	0.10101	20	83,6,6,4	MODIFIER	NONE	intron_variant	A530032D15Rik	c.430+80A>G
chr1	85094316	G	A	560	613	0.101142	2	297,251,38,27	LOW	NONE	synonymous_variant	A530032D15Rik	c.411C>T
chr1	85094364	A	G	813	358	0.195531	3	8,278,3,69	LOW	NONE	splice_region_variant&intron_variant	A530032D15Rik	c.368-5T>C
chr1	85094399	C	T	306	205	0.136585	0	0,176,0,29	MODIFIER	NONE	intron_variant	A530032D15Rik	c.368-40G>A
chr1	85094413	AG	A	76	170	0.058824	0	0,162,0,10	MODIFIER	NONE	intron_variant	A530032D15Rik	c.368-55delC
chr1	85097146	TA	T	132	60	0.15	8	29,22,8,1	MODIFIER	NONE	intron_variant	A530032D15Rik	c.367+2330delT
chr1	85097306	C	G	175	51	0.235294	0	2,37,0,12	MODIFIER	NONE	intron_variant	A530032D15Rik	c.367+2171G>C
chr1	85099347	G	T	136	51	0.137255	0	36,3,12,0	MODIFIER	NONE	intron_variant	A530032D15Rik	c.367+130C>A
chr1	85099399	CGG	C	112	60	0.15	0	56,0,9,0	MODIFIER	NONE	intron_variant	A530032D15Rik	c.367+76_367+77delCC
chr1	85099401	G	A	137	63	0.31746	3	31,0,22,1	MODIFIER	NONE	intron_variant	A530032D15Rik	c.367+76C>T
chr1	85099429	G	A	297	259	0.177606	17	154,33,67,4	MODIFIER	NONE	intron_variant	A530032D15Rik	c.367+48C>T
chr1	85099484	G	A	3794	965	0.201036	2	474,278,129,84	LOW	NONE	synonymous_variant	A530032D15Rik	c.360C>T
chr1	85099523	C	T	4478	1201	0.190674	9	493473106129	LOW	NONE	synonymous_variant	A530032D15Rik	c.321G>A
chr1	85099553	C	A	2655	800	0.175	7	215,440,38,105	LOW	NONE	synonymous_variant	A530032D15Rik	c.291G>T
chr1	85099723	A	G	233	130	0.146154	0	0,111,0,19	MODIFIER	NONE	intron_variant	A530032D15Rik	c.196-75T>C
chr1	85100198	A	T	88	255	0.027451	22	118,130,7,0	MODIFIER	NONE	intron_variant	A530032D15Rik	c.195+334T>A
chr1	85100296	C	T	107	191	0.052356	33	80,101,10,0	MODIFIER	NONE	intron_variant	A530032D15Rik	c.195+236G>A
chr1	85100322	G	A	107	197	0.050761	13	102,85,9,1	MODIFIER	NONE	intron_variant	A530032D15Rik	c.195+210C>T
chr1	85100420	A	G	1207	333	0.219219	11	140,113,53,26	MODIFIER	NONE	intron_variant	A530032D15Rik	c.195+112T>C
chr1	85100449	T	C	2960	276	0.496377	2	85,48,87,56	MODIFIER	NONE	intron_variant	A530032D15Rik	c.195+83A>G
chr1	85100567	G	A	919	107	0.514019	0	0,52,0,55	HIGH	NONE	stop_gained	A530032D15Rik	c.160C>T
chr1	85100636	G	T	105	51	0.176471	0	3,39,0,9	MODERATE	NONE	missense_variant	A530032D15Rik	c.91C>A
chr1	85112340	G	A	204	122	0.081967	0	109,2,11,0	MODIFIER	MODIFIER	NONE	NONE	upstream_gene_variant
chr1	85112363	G	T	1707	211	0.308057	0	143,1,67,0	MODIFIER	MODIFIER	NONE	NONE	upstream_gene_variant
chr1	85112378	G	T	650	264	0.117424	0	232,1,31,0	MODIFIER	MODIFIER	NONE	NONE	upstream_gene_variant
chr1	85112393	T	C	320	360	0.05	0	340,2,18,0	MODIFIER	MODIFIER	NONE	NONE	upstream_gene_variant
chr1	85112395	T	A	1114	378	0.134921	0	322,2,54,0	MODIFIER	MODIFIER	NONE	NONE	upstream_gene_variant
chr1	85112398	T	C	11060	392	0.84949	6	42,1,348,1	MODIFIER	MODIFIER	NONE	NONE	upstream_gene_variant
chr1	85112475	C	G	3384	1342	0.111028	1	816,372,108,45	MODIFIER	MODIFIER	NONE	NONE	upstream_gene_variant
chr1	85112482	G	A	3150	1359	0.103017	2	789,421,100,47	MODIFIER	MODIFIER	NONE	NONE	upstream_gene_variant
chr1	85112557	T	C	1978	900	0.108889	19	163,632,11,94	MODIFIER	MODIFIER	NONE	NONE	upstream_gene_variant
chr1	85112566	ACT	A	1247	753	0.079681	29	88,612,0,60	MODIFIER	MODIFIER	NONE	NONE	upstream_gene_variant
chr1	85112615	A	T	673	505	0.079208	18	51,411,0,42	MODIFIER	MODIFIER	NONE	NONE	upstream_gene_variant
chr1	85112676	C	G	211	192	0.0625	0	5,175,0,12	MODIFIER	MODIFIER	NONE	NONE	upstream_gene_variant
chr1	85112712	T	A	205	93	0.107527	0	1,82,0,10	MODIFIER	MODIFIER	NONE	NONE	upstream_gene_variant
chr1	85112725	G	A	195	65	0.138462	0	2,53,0,10	MODIFIER	MODIFIER	NONE	NONE	upstream_gene_variant
chr1	85112976	G	A	461	179	0.145251	0	144,7,27,1	MODIFIER	MODIFIER	NONE	NONE	upstream_gene_variant
chr1	85113010	C	T	1791	419	0.190931	2	286,53,70,10	MODIFIER	MODIFIER	NONE	NONE	upstream_gene_variant
chr1	85113011	G	T	293	435	0.043678	1	354,61,18,2	MODIFIER	MODIFIER	NONE	NONE	upstream_gene_variant
chr1	85113012	C	A	310	447	0.044743	1	363,63,19,2	MODIFIER	MODIFIER	NONE	NONE	upstream_gene_variant
chr1	85113047	G	A	1720	752	0.109043	3	532,131,73,14	MODIFIER	MODIFIER	NONE	NONE	upstream_gene_variant
chr1	85113065	A	C	778	925	0.046486	2	662,218,32,13	MODIFIER	MODIFIER	NONE	NONE	upstream_gene_variant
chr1	85113067	T	A	1982	948	0.097046	5	627,223,77,20	MODIFIER	MODIFIER	NONE	NONE	upstream_gene_variant
chr1	85113083	A	C	2330	1134	0.106702	18	685,326,97,26	MODIFIER	MODIFIER	NONE	NONE	upstream_gene_variant
chr1	85113155	GGAGT	G	774	1100	0.066364	10	395,642,20,53	MODIFIER	MODIFIER	NONE	NONE	upstream_gene_variant
chr1	85113211	T	C	865	483	0.134576	0	0,417,0,66	MODIFIER	MODIFIER	NONE	NONE	upstream_gene_variant
chr1	85113254	C	T	170	280	0.064286	0	0,261,0,19	MODIFIER	MODIFIER	NONE	NONE	upstream_gene_variant
chr1	85113274	C	T	377	207	0.140097	0	0,177,0,30	MODIFIER	MODIFIER	NONE	NONE	upstream_gene_variant
chr1	85115420	A	G	619	177	0.163842	11	87,60,12,18	MODIFIER	NONE	intergenic_region	A530032D15Rik-Gm7609	n.85115420A>G
chr1	85115440	A	G	631	205	0.146341	9	92,81,12,20	MODIFIER	NONE	intergenic_region	A530032D15Rik-Gm7609	n.85115440A>G
chr1	85115519	G	A	213	117	0.094017	9	26,80,0,11	MODIFIER	NONE	intergenic_region	A530032D15Rik-Gm7609	n.85115519G>A
chr1	85117096	C	G	105	55	0.109091	0	47,2,6,0	MODIFIER	NONE	intergenic_region	A530032D15Rik-Gm7609	n.85117096C>G
chr1	85117243	G	A	312	249	0.072289	20	88,141,14,6	MODIFIER	NONE	intergenic_region	A530032D15Rik-Gm7609	n.85117243G>A
chr1	85117313	G	GTC	392	129	0.131783	3	18,94,1,16	MODIFIER	NONE	intergenic_region	A530032D15Rik-Gm7609	n.85117313_85117314insTC
chr1	85117335	G	C	224	70	0.171429	0	3,51,0,14	MODIFIER	NONE	intergenic_region	A530032D15Rik-Gm7609	n.85117335G>C
chr1	85122973	G	T	461	66	0.454545	0	25,11,20,10	MODIFIER	NONE	intergenic_region	A530032D15Rik-Gm7609	n.85122973G>T
chr1	85123068	G	A	411	59	0.40678	0	0,34,0,25	MODIFIER	NONE	intergenic_region	A530032D15Rik-Gm7609	n.85123068G>A
chr1	85164010	C	A	105	85	0.105882	10	29,46,1,9	MODIFIER	NONE	intergenic_region	A530032D15Rik-Gm7609	n.85164010C>A
chr1	85164054	C	T	173	64	0.1875	9	12,39,0,13	MODIFIER	NONE	intergenic_region	A530032D15Rik-Gm7609	n.85164054C>T
chr1	85180481	GA	G	231	213	0.103286	17	155,37,22,0	MODIFIER	NONE	intergenic_region	A530032D15Rik-Gm7609	n.85180482delA
chr1	85180481	G	T	356	214	0.140187	24	146,37,31,0	MODIFIER	NONE	intergenic_region	A530032D15Rik-Gm7609	n.85180481G>T
chr1	85180506	T	A	425	296	0.128378	21	222,36,38,0	MODIFIER	NONE	intergenic_region	A530032D15Rik-Gm7609	n.85180506T>A
chr1	85180519	C	T	590	313	0.159744	20	224,39,49,1	MODIFIER	NONE	intergenic_region	A530032D15Rik-Gm7609	n.85180519C>T
chr1	85180525	G	A	1046	350	0.22	7	202,67,67,14	MODIFIER	NONE	intergenic_region	A530032D15Rik-Gm7609	n.85180525G>A
chr1	85180539	C	A	644	407	0.140049	4	210,136,41,20	MODIFIER	NONE	intergenic_region	A530032D15Rik-Gm7609	n.85180539C>A
chr1	85180551	G	A	674	464	0.12931	0	200,202,31,31	MODIFIER	NONE	intergenic_region	A530032D15Rik-Gm7609	n.85180551G>A
chr1	85180555	C	G	1512	469	0.232409	3	172,184,49,63	MODIFIER	NONE	intergenic_region	A530032D15Rik-Gm7609	n.85180555C>G
chr1	85180667	T	C	382	76	0.315789	0	1,51,0,24	MODIFIER	NONE	intergenic_region	A530032D15Rik-Gm7609	n.85180667T>C
chr1	85180668	G	A	128	72	0.138889	0	1,61,0,10	MODIFIER	NONE	intergenic_region	A530032D15Rik-Gm7609	n.85180668G>A
chr1	85185443	A	G	145	50	0.14	31	42,1,3,4	MODIFIER	NONE	intergenic_region	A530032D15Rik-Gm7609	n.85185443A>G
chr1	85185458	T	C	112	55	0.109091	32	47,2,2,4	MODIFIER	NONE	intergenic_region	A530032D15Rik-Gm7609	n.85185458T>C
chr1	85185588	C	A	240	345	0.055072	0	161,165,10,9	MODIFIER	NONE	intergenic_region	A530032D15Rik-Gm7609	n.85185588C>A
chr1	85185604	A	G	219	345	0.052174	4	134,192,10,9	MODIFIER	NONE	intergenic_region	A530032D15Rik-Gm7609	n.85185604A>G
chr1	85185617	C	T	162	334	0.041916	0	121,198,6,9	MODIFIER	NONE	intergenic_region	A530032D15Rik-Gm7609	n.85185617C>T
chr1	85185621	G	A	133	320	0.0375	4	112,196,6,6	MODIFIER	NONE	intergenic_region	A530032D15Rik-Gm7609	n.85185621G>A
chr1	85185638	T	C	429	228	0.122807	7	59,140,5,24	MODIFIER	NONE	intergenic_region	A530032D15Rik-Gm7609	n.85185638T>C
chr1	85191431	T	A	262	177	0.073446	14	101,63,12,1	MODIFIER	NONE	intergenic_region	A530032D15Rik-Gm7609	n.85191431T>A
chr1	85191457	G	A	420	183	0.103825	15	77,87,14,5	MODIFIER	NONE	intergenic_region	A530032D15Rik-Gm7609	n.85191457G>A
chr1	85191498	C	T	584	147	0.170068	14	40,82,14,11	MODIFIER	NONE	intergenic_region	A530032D15Rik-Gm7609	n.85191498C>T
chr1	85192139	A	G	101	285	0.024561	16	121,157,0,7	MODIFIER	NONE	intergenic_region	A530032D15Rik-Gm7609	n.85192139A>G
chr1	85192372	A	T	95	58	0.12069	0	38,13,6,1	MODIFIER	NONE	intergenic_region	A530032D15Rik-Gm7609	n.85192372A>T
chr1	85199563	A	G	317	56	0.321429	0	36,0,20,0	MODIFIER	MODIFIER	NONE	NONE	upstream_gene_variant
chr1	85199641	G	T	781	236	0.199153	0	154,30,43,9	LOW	MODIFIER	NONE	NONE	5_prime_UTR_premature_start_codon_gain_variant
chr1	85199709	A	G	809	461	0.106291	64	216,194,8,43	MODIFIER	NONE	5_prime_UTR_variant	Gm7609	c.-400A>G
chr1	85199711	C	G	90	457	0.019694	13	214,234,1,8	MODIFIER	NONE	5_prime_UTR_variant	Gm7609	c.-398C>G
chr1	85199763	C	G	156	350	0.031429	2	104,234,2,10	MODIFIER	NONE	intron_variant	Gm7609	c.-387+41C>G
chr1	85199775	T	C	159	298	0.036913	1	77,209,2,10	MODIFIER	NONE	intron_variant	Gm7609	c.-387+53T>C
chr1	85199821	C	T	1740	127	0.464567	1	6,62,4,55	MODIFIER	NONE	intron_variant	Gm7609	c.-387+99C>T
chr1	85246819	C	T	88	68	0.073529	0	60,3,5,0	MODIFIER	MODIFIER	NONE	NONE	3_prime_UTR_variant
chr1	85246866	T	C	150	180	0.055556	2	157,13,9,1	MODIFIER	MODIFIER	NONE	NONE	3_prime_UTR_variant
chr1	85246898	C	T	1144	305	0.196721	0	212,32,53,8	MODIFIER	MODIFIER	NONE	NONE	3_prime_UTR_variant
chr1	85246950	G	A	1253	691	0.11288	2	506,100,68,16	MODERATE	MODERATE	NONE	NONE	missense_variant
chr1	85247114	T	C	2074	1081	0.112858	12	394,560,41,86	LOW	LOW	NONE	NONE	synonymous_variant
chr1	85247125	G	C	1974	955	0.112042	5	340,500,40,74	MODERATE	MODERATE	NONE	NONE	missense_variant
chr1	85247131	G	C	2129	896	0.120536	3	312,467,42,74	MODERATE	MODERATE	NONE	NONE	missense_variant
chr1	85247147	A	G	348	837	0.029869	9	267,541,5,24	MODIFIER	MODIFIER	NONE	NONE	intron_variant
chr1	85247282	C	A	1906	142	0.478873	8	3,63,9,67	MODIFIER	MODIFIER	NONE	NONE	intron_variant
chr1	85247322	G	A	267	62	0.193548	0	3,45,0,14	MODIFIER	MODIFIER	NONE	NONE	intron_variant
chr1	85254030	T	A	330	54	0.296296	3	31,6,16,1	MODIFIER	MODIFIER	NONE	NONE	intron_variant
chr1	85254434	C	G	489	94	0.308511	0	63,1,30,0	MODIFIER	MODIFIER	NONE	NONE	intron_variant
chr1	85254459	A	G	91	178	0.050562	0	165,4,9,0	MODIFIER	MODIFIER	NONE	NONE	intron_variant
chr1	85254630	AG	A	309	316	0.079114	0	46,251,4,21	MODIFIER	MODIFIER	NONE	NONE	intron_variant
chr1	85254641	G	A	479	259	0.127413	1	22,202,4,31	MODIFIER	MODIFIER	NONE	NONE	intron_variant
chr1	85254665	A	G	137	142	0.084507	0	7,123,0,12	MODIFIER	MODIFIER	NONE	NONE	intron_variant
chr1	85254681	A	G	91	95	0.073684	0	1,87,0,7	MODIFIER	MODIFIER	NONE	NONE	intron_variant
chr1	85257268	A	G	173	73	0.136986	0	62,0,11,0	MODIFIER	MODIFIER	NONE	NONE	intron_variant
chr1	85257270	A	ACGTGCG	89	73	0.082192	0	65,0,6,0	MODIFIER	MODIFIER	NONE	NONE	intron_variant
chr1	85257270	A	T	105	73	0.09589	0	64,0,9,0	MODIFIER	MODIFIER	NONE	NONE	intron_variant
chr1	85257271	CGTGTGT	C	126	73	0.109589	0	62,0,8,0	MODIFIER	MODIFIER	NONE	NONE	intron_variant
chr1	85257320	T	A	194	159	0.09434	0	119,23,14,3	MODIFIER	MODIFIER	NONE	NONE	intron_variant
chr1	85257337	C	A	201	253	0.075099	5	186,42,17,7	MODIFIER	MODIFIER	NONE	NONE	intron_variant
chr1	85257346	AG	A	242	292	0.078767	3	216,53,17,6	MODIFIER	MODIFIER	NONE	NONE	intron_variant
chr1	85257346	A	T	172	292	0.061644	2	217,57,16,2	MODIFIER	MODIFIER	NONE	NONE	intron_variant
chr1	85257385	C	T	160	463	0.047516	73	352,89,5,17	HIGH	MODIFIER	NONE	NONE	splice_donor_variant&intron_variant
chr1	85257449	G	A	322	453	0.07947	1	131,283,11,28	MODERATE	MODIFIER	NONE	NONE	missense_variant
chr1	85257458	G	A	273	419	0.073986	5	83,303,10,23	MODERATE	MODIFIER	NONE	NONE	missense_variant
chr1	85257513	C	T	123	220	0.072727	0	3,201,0,16	MODIFIER	MODIFIER	NONE	NONE	intron_variant
chr1	85257519	C	T	87	192	0.0625	0	3,177,0,12	MODIFIER	MODIFIER	NONE	NONE	intron_variant
chr1	85257547	T	A	424	88	0.306818	0	2,59,0,27	MODIFIER	MODIFIER	NONE	NONE	intron_variant
chr1	85259628	GAAA	G	123	112	0.133929	11	74,1,13,2	MODIFIER	MODIFIER	NONE	NONE	intron_variant
chr1	85259698	T	A	153	266	0.06391	27	178,65,23,0	MODERATE	MODERATE	NONE	NONE	missense_variant
chr1	85259732	G	A	196	304	0.072368	5	172,109,17,6	LOW	LOW	NONE	NONE	synonymous_variant
chr1	85259779	C	T	168	371	0.056604	18	150,200,15,6	MODERATE	MODERATE	NONE	NONE	missense_variant
chr1	85259789	C	A	164	394	0.053299	15	177,195,16,6	MODERATE	MODERATE	NONE	NONE	missense_variant
chr1	85259813	G	A	925	435	0.167816	21	192,168,53,22	LOW	LOW	NONE	NONE	synonymous_variant
chr1	85259821	C	T	92	420	0.035714	8	245,157,7,10	MODERATE	MODERATE	NONE	NONE	missense_variant
chr1	85259840	C	A	202	339	0.067847	4	212,104,13,10	LOW	LOW	NONE	NONE	synonymous_variant
chr1	85259869	T	G	302	291	0.103093	3	143,115,21,12	LOW	LOW	NONE	NONE	splice_region_variant&intron_variant
chr1	85259925	C	G	203	299	0.076923	2	14,261,0,24	MODIFIER	MODIFIER	NONE	NONE	intron_variant
chr1	85259981	C	T	140	170	0.082353	0	0,155,0,15	MODIFIER	MODIFIER	NONE	NONE	intron_variant
chr1	85259983	A	T	157	162	0.092593	0	0,147,0,15	MODIFIER	MODIFIER	NONE	NONE	intron_variant
chr1	85260254	C	T	107	139	0.071942	4	107,22,10,0	MODIFIER	MODIFIER	NONE	NONE	intron_variant
chr1	85269865	C	T	104	82	0.109756	0	72,1,9,0	MODIFIER	MODIFIER	NONE	NONE	intron_variant
chr1	85269895	C	A	224	83	0.192771	0	65,1,17,0	MODIFIER	MODIFIER	NONE	NONE	intron_variant
chr1	85269955	C	A	250	55	0.290909	1	16,22,6,11	MODIFIER	MODIFIER	NONE	NONE	intron_variant
chr1	85270115	C	T	113	108	0.092593	10	38,60,1,9	MODIFIER	MODIFIER	NONE	NONE	5_prime_UTR_variant
chr1	85281611	A	C	184	476	0.029412	41	106,354,11,4	MODIFIER	NONE	intergenic_region	C130026I21Rik-Sp110	n.85281611A>C
chr1	85281678	C	A	1986	163	0.453988	0	3,82,2,76	MODIFIER	NONE	intergenic_region	C130026I21Rik-Sp110	n.85281678C>A
chr1	85283968	C	G	216	279	0.050179	21	184,80,15,0	MODIFIER	NONE	intergenic_region	C130026I21Rik-Sp110	n.85283968C>G
chr1	85284014	C	T	1751	457	0.207877	43	181,162,84,29	MODIFIER	NONE	intergenic_region	C130026I21Rik-Sp110	n.85284014C>T
chr1	85284053	C	T	3927	575	0.33913	40	167,205,126,77	MODIFIER	NONE	intergenic_region	C130026I21Rik-Sp110	n.85284053C>T
chr1	85340888	C	T	683	271	0.188192	11	121,95,23,32	MODIFIER	NONE	intergenic_region	C130026I21Rik-Sp110	n.85340888C>T
chr1	85340958	C	T	139	190	0.073684	0	9,167,0,14	MODIFIER	NONE	intergenic_region	C130026I21Rik-Sp110	n.85340958C>T
chr1	85341127	C	A	136	90	0.133333	9	60,15,14,0	MODIFIER	NONE	intergenic_region	C130026I21Rik-Sp110	n.85341127C>A
chr1	85341764	T	A	123	56	0.160714	0	46,0,10,0	MODIFIER	NONE	intergenic_region	C130026I21Rik-Sp110	n.85341764T>A
chr1	85341791	G	C	306	100	0.2	0	76,3,21,0	MODIFIER	NONE	intergenic_region	C130026I21Rik-Sp110	n.85341791G>C
chr1	85448235	C	G	222	62	0.209677	0	49,0,13,0	MODIFIER	NONE	intergenic_region	C130026I21Rik-Sp110	n.85448235C>G
chr1	85448322	A	G	204	421	0.04038	29	264,139,18,0	MODIFIER	NONE	intergenic_region	C130026I21Rik-Sp110	n.85448322A>G
chr1	85448382	G	A	1290	477	0.142558	6	188,219,27,43	MODIFIER	NONE	intergenic_region	C130026I21Rik-Sp110	n.85448382G>A
chr1	85448399	T	C	962	417	0.1247	10	125,239,25,28	MODIFIER	NONE	intergenic_region	C130026I21Rik-Sp110	n.85448399T>C
chr1	85448419	G	A	872	325	0.138462	11	79,196,21,29	MODIFIER	NONE	intergenic_region	C130026I21Rik-Sp110	n.85448419G>A
chr1	85448426	CTCTATT	C	577	259	0.111969	11	65,174,3,26	MODIFIER	NONE	intergenic_region	C130026I21Rik-Sp110	n.85448427_85448432delTCTATT
chr1	85448432	T	C	2710	230	0.452174	3	19,77,26,79	MODIFIER	NONE	intergenic_region	C130026I21Rik-Sp110	n.85448432T>C
chr1	85448476	G	C	485	122	0.204918	0	6,87,1,28	MODIFIER	NONE	intergenic_region	C130026I21Rik-Sp110	n.85448476G>C
chr1	85448480	C	G	206	108	0.111111	0	6,84,1,17	MODIFIER	NONE	intergenic_region	C130026I21Rik-Sp110	n.85448480C>G
chr1	85448492	C	G	394	88	0.340909	0	4,47,3,34	MODIFIER	NONE	intergenic_region	C130026I21Rik-Sp110	n.85448492C>G
chr1	85448508	CTCTCTCTCTCTGTGTG	C	196	70	0.157143	0	4,55,0,11	MODIFIER	NONE	intergenic_region	C130026I21Rik-Sp110	n.85448509_85448524delTCTCTCTCTCTGTGTG
chr1	85448518	CTGTGTGTGTG	C	130	53	0.150943	0	3,41,0,8	MODIFIER	NONE	intergenic_region	C130026I21Rik-Sp110	n.85448519_85448528delTGTGTGTGTG
chr1	85484337	T	G	1098	1029	0.107872	41	824,87,91,27	MODIFIER	NONE	intergenic_region	C130026I21Rik-Sp110	n.85484337T>G
chr1	85484390	G	T	89	1790	0.018994	5	1126,628,20,16	MODIFIER	NONE	intergenic_region	C130026I21Rik-Sp110	n.85484390G>T
chr1	85484456	C	T	464	1085	0.061751	4	23,992,0,70	MODIFIER	NONE	intergenic_region	C130026I21Rik-Sp110	n.85484456C>T
chr1	85484791	C	T	581	534	0.102996	26	191,282,37,23	MODIFIER	NONE	intergenic_region	C130026I21Rik-Sp110	n.85484791C>T
chr1	85485103	G	T	157	61	0.163934	0	28,21,7,5	MODIFIER	NONE	intergenic_region	C130026I21Rik-Sp110	n.85485103G>T
chr1	85485181	A	G	390	99	0.232323	22	24,49,17,9	MODIFIER	NONE	intergenic_region	C130026I21Rik-Sp110	n.85485181A>G
chr1	85485245	G	T	127	53	0.169811	4	7,34,0,11	MODIFIER	NONE	intergenic_region	C130026I21Rik-Sp110	n.85485245G>T
chr1	85488275	T	C	550	73	0.410959	1	39,4,29,1	MODIFIER	NONE	intergenic_region	C130026I21Rik-Sp110	n.85488275T>C
chr1	85491229	T	G	1584	116	0.491379	0	53,0,63,0	MODIFIER	NONE	intergenic_region	C130026I21Rik-Sp110	n.85491229T>G
chr1	85491279	A	T	306	249	0.068273	3	161,71,10,7	MODIFIER	NONE	intergenic_region	C130026I21Rik-Sp110	n.85491279A>T
chr1	85491301	C	T	1657	299	0.227425	9	136,91,35,37	MODIFIER	NONE	intergenic_region	C130026I21Rik-Sp110	n.85491301C>T
chr1	85491312	A	G	2657	320	0.325	0	107,107,53,53	MODIFIER	NONE	intergenic_region	C130026I21Rik-Sp110	n.85491312A>G
chr1	85491344	C	G	2085	319	0.247649	3	78,160,22,59	MODIFIER	NONE	intergenic_region	C130026I21Rik-Sp110	n.85491344C>G
chr1	85496116	A	C	92	65	0.123077	0	57,0,8,0	MODIFIER	NONE	intergenic_region	C130026I21Rik-Sp110	n.85496116A>C
chr1	85496177	T	A	97	72	0.125	2	58,4,9,1	MODIFIER	NONE	intergenic_region	C130026I21Rik-Sp110	n.85496177T>A
chr1	85500973	T	C	312	124	0.185484	2	97,3,23,1	MODIFIER	NONE	intergenic_region	C130026I21Rik-Sp110	n.85500973T>C
chr1	85501143	G	A	149	297	0.053872	23	194,86,5,11	MODIFIER	NONE	intergenic_region	C130026I21Rik-Sp110	n.85501143G>A
chr1	85512748	T	G	184	112	0.098214	15	96,4,9,3	MODIFIER	NONE	intergenic_region	C130026I21Rik-Sp110	n.85512748T>G
chr1	85513098	C	T	120	521	0.026871	21	339,168,14,0	MODIFIER	NONE	intergenic_region	C130026I21Rik-Sp110	n.85513098C>T
chr1	85513131	G	A	1032	670	0.110448	19	379,215,59,16	MODIFIER	NONE	intergenic_region	C130026I21Rik-Sp110	n.85513131G>A
chr1	85513171	A	T	4231	661	0.326778	6	225,213,126,97	MODIFIER	NONE	intergenic_region	C130026I21Rik-Sp110	n.85513171A>T
chr1	85513250	C	T	1334	261	0.295019	21	15,167,0,79	MODIFIER	NONE	intergenic_region	C130026I21Rik-Sp110	n.85513250C>T
chr1	85513254	C	A	1250	248	0.290323	23	16,160,0,72	MODIFIER	NONE	intergenic_region	C130026I21Rik-Sp110	n.85513254C>A
chr1	85513347	C	T	367	60	0.35	0	1,37,0,22	MODIFIER	NONE	intergenic_region	C130026I21Rik-Sp110	n.85513347C>T
chr1	85526716	A	G	1218	278	0.208633	44	89,130,42,17	MODIFIER	NONE	intergenic_region	C130026I21Rik-Sp110	n.85526716A>G
chr1	85526807	C	T	86	127	0.055118	21	25,93,6,3	MODIFIER	NONE	intergenic_region	C130026I21Rik-Sp110	n.85526807C>T
chr1	85549648	T	C	489	104	0.317308	20	50,21,31,2	MODIFIER	NONE	intergenic_region	C130026I21Rik-Sp110	n.85549648T>C
chr1	85550343	C	T	900	529	0.117202	5	306,156,38,27	MODIFIER	NONE	intergenic_region	C130026I21Rik-Sp110	n.85550343C>T
chr1	85550423	G	A	139	376	0.042553	4	85,275,2,14	MODIFIER	NONE	intergenic_region	C130026I21Rik-Sp110	n.85550423G>A
chr1	85550548	C	T	224	143	0.132867	27	73,51,18,1	MODIFIER	NONE	intergenic_region	C130026I21Rik-Sp110	n.85550548C>T
chr1	85550564	A	G	166	136	0.110294	25	80,40,16,0	MODIFIER	NONE	intergenic_region	C130026I21Rik-Sp110	n.85550564A>G
chr1	85550686	A	G	169	110	0.136364	0	1,93,0,16	MODIFIER	NONE	intergenic_region	C130026I21Rik-Sp110	n.85550686A>G
chr1	85550711	T	C	116	94	0.117021	0	1,82,0,11	MODIFIER	NONE	intergenic_region	C130026I21Rik-Sp110	n.85550711T>C
chr1	85577204	T	G	174	74	0.121622	0	52,7,11,1	MODIFIER	MODIFIER	NONE	NONE	3_prime_UTR_variant
chr1	85577222	GAC	G	106	108	0.055556	0	84,18,5,1	MODIFIER	MODIFIER	NONE	NONE	3_prime_UTR_variant
chr1	85577249	C	T	522	167	0.137725	17	98,39,14,16	MODIFIER	MODIFIER	NONE	NONE	3_prime_UTR_variant
chr1	85577269	A	G	652	194	0.149485	13	108,55,14,17	MODIFIER	MODIFIER	NONE	NONE	3_prime_UTR_variant
chr1	85577329	A	C	144	160	0.05	5	59,93,1,7	MODERATE	MODERATE	NONE	NONE	missense_variant
chr1	85579028	T	G	120	190	0.057895	13	121,58,4,7	MODIFIER	MODIFIER	NONE	NONE	intron_variant
chr1	85579079	T	G	187	294	0.054422	20	124,153,2,15	MODERATE	MODERATE	NONE	NONE	missense_variant
chr1	85579092	G	A	166	271	0.051661	15	107,149,2,13	MODERATE	MODERATE	NONE	NONE	missense_variant
chr1	85579128	C	T	105	225	0.04	1	58,156,2,9	MODERATE	MODERATE	NONE	NONE	missense_variant
chr1	85579153	A	T	293	120	0.133333	4	23,79,2,16	LOW	LOW	NONE	NONE	synonymous_variant
chr1	85588944	C	A	134	63	0.190476	15	49,1,10,3	MODIFIER	MODIFIER	NONE	NONE	intron_variant
chr1	85588969	C	A	164	91	0.164835	0	59,2,15,0	MODIFIER	MODIFIER	NONE	NONE	intron_variant
chr1	85588969	C	T	134	91	0.142857	13	59,2,12,3	MODIFIER	MODIFIER	NONE	NONE	intron_variant
chr1	85589100	C	A	350	188	0.170213	14	58,96,20,14	MODIFIER	MODIFIER	NONE	NONE	intron_variant
chr1	85589118	C	G	386	192	0.166667	19	45,111,19,17	MODERATE	MODERATE	NONE	NONE	missense_variant
chr1	85589148	T	A	391	177	0.175141	14	49,92,20,16	LOW	LOW	NONE	NONE	synonymous_variant
chr1	85589192	C	A	86	149	0.053691	9	41,100,0,8	HIGH	HIGH	NONE	NONE	splice_acceptor_variant&intron_variant
chr1	85601172	T	G	303	954	0.026205	36	481,444,25,4	MODERATE	MODIFIER	MODIFIER	NONE	NONE
chr1	85601206	C	T	1082	944	0.07839	28	367,501,46,29	MODIFIER	MODIFIER	MODIFIER	NONE	NONE
chr1	85601210	T	A	15143	932	0.585837	35	178179217358	MODIFIER	MODIFIER	MODIFIER	NONE	NONE
chr1	85601257	C	A	686	586	0.087031	3	134,398,16,36	MODIFIER	MODIFIER	MODIFIER	NONE	NONE
chr1	85601266	T	A	123	507	0.027613	30	108,385,9,5	MODIFIER	MODIFIER	MODIFIER	NONE	NONE
chr1	85601338	C	T	145	176	0.068182	0	2,161,0,12	MODIFIER	MODIFIER	MODIFIER	NONE	NONE
chr1	85601352	C	T	150	134	0.089552	0	2,119,0,13	MODIFIER	MODIFIER	MODIFIER	NONE	NONE
chr1	85601359	G	A	191	116	0.12069	0	0,101,0,15	MODIFIER	MODIFIER	MODIFIER	NONE	NONE
chr1	85610636	A	T	991	144	0.395833	0	85,1,58,0	MODIFIER	NONE	intron_variant	Sp140	c.196-103A>T
chr1	85610664	T	C	85	339	0.041298	0	323,2,14,0	MODIFIER	NONE	intron_variant	Sp140	c.196-75T>C
chr1	85610672	G	C	205	408	0.066176	0	374,7,27,0	MODIFIER	NONE	intron_variant	Sp140	c.196-67G>C
chr1	85610733	T	A	2200	1352	0.137574	0	786,372,132,62	LOW	NONE	splice_region_variant&intron_variant	Sp140	c.196-6T>A
chr1	85610753	A	C	528	1670	0.044311	6	938,655,40,37	LOW	NONE	synonymous_variant	Sp140	c.210A>C
chr1	85610774	GGA	G	898	1849	0.056247	18	892,864,40,64	HIGH	NONE	frameshift_variant	Sp140	c.237_238delAG
chr1	85610791	A	G	697	1860	0.046774	30	836,937,25,62	MODERATE	NONE	missense_variant	Sp140	c.248A>G
chr1	85610808	CAGA	C	2554	1661	0.125226	77	603,864,129,79	MODERATE	NONE	conservative_inframe_deletion	Sp140	c.271_273delAAG
chr1	85610828	T	A	2778	1343	0.159345	12	470654107112	MODERATE	NONE	missense_variant	Sp140	c.285T>A
chr1	85610834	G	T	181	1234	0.026742	5	519,680,12,23	LOW	NONE	synonymous_variant	Sp140	c.291G>T
chr1	85614934	G	A	296	77	0.168831	61	8,56,11,2	MODIFIER	NONE	intron_variant	Sp140	c.418+80G>A
chr1	85615204	T	C	910	129	0.255814	3	56,38,18,17	LOW	NONE	synonymous_variant	Sp140	c.435T>C
chr1	85615212	C	G	993	137	0.262774	3	55,43,19,20	MODERATE	NONE	missense_variant	Sp140	c.443C>G
chr1	85615280	G	T	473	102	0.186275	0	34,47,8,13	MODIFIER	NONE	intron_variant	Sp140	c.502+9G>T
chr1	85615292	G	A	344	89	0.157303	0	25,47,6,11	MODIFIER	NONE	intron_variant	Sp140	c.502+21G>A
chr1	85615314	T	C	158	64	0.125	1	16,40,1,7	MODIFIER	NONE	intron_variant	Sp140	c.502+43T>C
chr1	85615316	G	A	130	63	0.095238	4	16,41,0,6	MODIFIER	NONE	intron_variant	Sp140	c.502+45G>A
chr1	85619965	T	A	378	53	0.339623	14	35,0,15,3	MODIFIER	NONE	intron_variant	Sp140	c.503-91T>A
chr1	85620051	C	T	113	156	0.057692	35	102,44,1,9	LOW	NONE	splice_region_variant&intron_variant	Sp140	c.503-5C>T
chr1	85620099	A	G	118	242	0.03719	18	127,106,1,8	MODERATE	NONE	missense_variant	Sp140	c.546A>G
chr1	85621644	C	T	4154	282	0.663121	0	56,38,113,75	MODIFIER	NONE	intron_variant	Sp140	c.605-10C>T
chr1	85621722	G	A	96	170	0.058824	0	25,134,1,10	MODIFIER	NONE	intron_variant	Sp140	c.658+15G>A
chr1	85626133	G	A	100	173	0.040462	1	96,67,5,5	MODERATE	NONE	missense_variant	Sp140	c.692G>A
chr1	85635420	A	G	207	58	0.172414	7	48,0,9,1	MODIFIER	NONE	intron_variant	Sp140	c.973-139A>G
chr1	85635443	A	G	114	64	0.09375	7	57,1,5,1	MODIFIER	NONE	intron_variant	Sp140	c.973-116A>G
chr1	85635605	A	G	425	393	0.071247	23	179,184,23,7	MODERATE	NONE	missense_variant&splice_region_variant	Sp140	c.1019A>G
chr1	85635618	C	T	406	367	0.073569	17	145,194,19,9	MODIFIER	NONE	intron_variant	Sp140	c.1020+12C>T
chr1	85635624	C	G	2691	347	0.334294	15	79,148,56,63	MODIFIER	NONE	intron_variant	Sp140	c.1020+18C>G
chr1	85635628	T	G	2412	349	0.30659	9	80,160,46,62	MODIFIER	NONE	intron_variant	Sp140	c.1020+22T>G
chr1	85635658	A	T	167	284	0.045775	1	63,208,2,11	MODIFIER	NONE	intron_variant	Sp140	c.1020+52A>T
chr1	85642692	G	T	182	50	0.26	6	10,27,1,12	MODIFIER	NONE	intron_variant	Sp140	c.1284+45G>T
chr1	85642854	T	C	196	100	0.15	4	76,8,13,3	MODIFIER	NONE	intron_variant	Sp140	c.1285-81T>C
chr1	85643220	G	A	673	497	0.082495	50	255,199,9,34	LOW	NONE	synonymous_variant	Sp140	c.1380G>A
chr1	85643221	A	G	652	493	0.081136	57	252,198,7,34	MODERATE	NONE	missense_variant	Sp140	c.1381A>G
chr1	85649959	C	T	130	59	0.101695	6	51,1,6,1	MODIFIER	MODIFIER	MODIFIER	MODIFIER	MODIFIER
chr1	85650053	T	C	85	169	0.029586	7	109,55,5,0	MODIFIER	MODIFIER	MODIFIER	MODIFIER	NONE
chr1	85650131	A	G	1562	270	0.237037	16	78,125,37,30	LOW	LOW	LOW	LOW	NONE
chr1	85650213	T	C	545	104	0.230769	12	11,67,0,25	MODIFIER	MODIFIER	MODIFIER	MODIFIER	NONE
chr1	85650219	C	T	524	94	0.244681	9	9,61,0,24	MODIFIER	MODIFIER	MODIFIER	MODIFIER	NONE
chr1	86304994	C	T	646	74	0.297297	8	46,4,19,5	MODIFIER	NONE	intron_variant	B3gnt7	c.12-51C>T
chr1	86638703	T	G	762	104	0.259615	2	40,34,14,16	MODIFIER	NONE	intergenic_region	Cops7b-Nppc	n.86638703T>G
chr1	86908869	A	G	453	142	0.169014	23	41,74,18,9	MODIFIER	MODIFIER	NONE	NONE	intron_variant
chr1	86908923	C	T	563	130	0.230769	34	57,43,6,24	MODIFIER	MODIFIER	NONE	NONE	intron_variant
chr1	86909027	A	G	112	301	0.033223	2	172,116,9,4	MODIFIER	MODIFIER	NONE	NONE	intron_variant
chr1	86909240	T	G	2756	284	0.341549	16	79,105,29,71	MODIFIER	MODIFIER	NONE	NONE	intron_variant
chr1	86909328	T	G	941	180	0.238889	1	64,69,24,23	MODIFIER	MODIFIER	NONE	NONE	intron_variant
chr1	86909331	T	C	215	181	0.071823	25	87,81,1,12	MODIFIER	MODIFIER	NONE	NONE	intron_variant
chr1	86909391	G	A	123	241	0.041494	13	126,105,2,8	MODIFIER	MODIFIER	NONE	NONE	intron_variant
chr1	87420259	CT	C	247	89	0.202247	12	68,2,15,3	MODIFIER	MODIFIER	NONE	NONE	intron_variant
chr1	87698263	GCTC	G	75	138	0.021739	2	43,94,0,3	MODIFIER	MODIFIER	MODIFIER	MODIFIER	NONE
chr1	87844020	TTAAA	T	1136	96	0.333333	13	63,1,28,4	MODIFIER	NONE	intron_variant	Sag	c.1094-91_1094-88delTAAA
chr1	88015842	T	A	231	261	0.045977	4	93,156,6,6	MODIFIER	NONE	intergenic_region	Usp40-Ugt1a10	n.88015842T>A
chr1	88015889	T	G	158	170	0.047059	0	55,107,3,5	MODIFIER	NONE	intergenic_region	Usp40-Ugt1a10	n.88015889T>G
chr1	88015902	C	G	115	146	0.041096	10	50,90,0,6	MODIFIER	NONE	intergenic_region	Usp40-Ugt1a10	n.88015902C>G
chr1	88211842	C	T	651	99	0.262626	16	70,1,24,4	MODIFIER	MODIFIER	MODIFIER	MODIFIER	MODIFIER
chr1	88211867	C	T	649	143	0.174825	2	112,6,25,0	MODIFIER	MODIFIER	MODIFIER	MODIFIER	MODIFIER
chr1	88211871	G	A	657	155	0.167742	2	122,6,27,0	MODIFIER	MODIFIER	MODIFIER	MODIFIER	MODIFIER
chr1	88211889	A	G	179	210	0.042857	0	193,7,10,0	MODIFIER	MODIFIER	MODIFIER	MODIFIER	MODIFIER
chr1	88211898	G	A	5280	237	0.670886	1	64,2,163,8	MODIFIER	MODIFIER	MODIFIER	MODIFIER	MODIFIER
chr1	88211915	A	G	810	302	0.115894	1	241,24,32,4	MODIFIER	MODIFIER	MODIFIER	MODIFIER	MODIFIER
chr1	88211922	A	C	3025	346	0.317919	2	202,30,96,17	MODIFIER	MODIFIER	MODIFIER	MODIFIER	MODIFIER
[truncated: 102,615 more rows]
